# Supplementary material for: Cytotoxic CD8+ Temra cells show loss of chromatin accessibility at genes associated with T cell activation
Source: Front Immunol. 2024 Feb 2;15:1285798. doi: 10.3389/fimmu.2024.1285798 (PMC10870784; doi:10.3389/fimmu.2024.1285798)
Supplement: Supplementary Table 1 — Lists of differentially expressed genes between CD8+ T cell subsets. [file Table_1.xlsx]

## Sheet: NAvsMEM
ID	NA Avg (log2)	MEM Avg (log2)	Fold Change	P-val	FDR P-val	Gene Symbol	Description	Group
TC1200009847.hg.1	5.06	9.69	-24.79	2.17e-18	2.85e-16	A2M	alpha-2-macroglobulin	Multiple_Complex
TC1900006508.hg.1	8.83	9.87	-2.06	1.44e-05	0.0002	ABCA7	ATP binding cassette subfamily A member 7	Multiple_Complex
TC0600008087.hg.1	7.44	8.91	-2.77	4.31e-05	0.0004	ABCC10	ATP binding cassette subfamily C member 10	Multiple_Complex
TC1700012324.hg.1	8.02	9.04	-2.03	4.87e-05	0.0005	ABR	active BCR-related	Multiple_Complex
TC0200011219.hg.1	7.86	6.61	2.38	3.45e-05	0.0004	ACKR3	atypical chemokine receptor 3	Multiple_Complex
TC0X00007574.hg.1	5.47	6.52	-2.06	5.69e-05	0.0005	ACRC	acidic repeat containing	Multiple_Complex
TC0400012621.hg.1	4.23	5.25	-2.03	0.0001	0.0009	ACSL1	acyl-CoA synthetase long-chain family member 1	Multiple_Complex
TC1000008926.hg.1	9.41	10.68	-2.41	5.83e-09	1.59e-07	ACSL5	acyl-CoA synthetase long-chain family member 5	Multiple_Complex
TC1600011362.hg.1	7.31	5.41	3.73	1.35e-10	5.24e-09	ACSM3	acyl-CoA synthetase medium-chain family member 3	Multiple_Complex
TC1000011370.hg.1	8.8	10.48	-3.2	4.85e-14	3.35e-12	ACTA2	actin, alpha 2, smooth muscle, aorta	Multiple_Complex
TC1400009529.hg.1	13.22	6.04	144.92	6.06e-38	1.63e-34	ACTN1; HMGN1P3	actinin, alpha 1; high mobility group nucleosome binding domain 1 pseudogene 3	Multiple_Complex
TC1900008020.hg.1	9.52	11.65	-4.36	1.02e-14	7.95e-13	ACTN4	actinin, alpha 4	Multiple_Complex
TC0200014694.hg.1	8.01	6.75	2.39	5.33e-07	9.31e-06	ACVR1C	activin A receptor type IC	Multiple_Complex
TC0500012599.hg.1	4.59	7.07	-5.57	1.45e-16	1.46e-14	ADAM19	ADAM metallopeptidase domain 19	Multiple_Complex
TC0700008265.hg.1	5.59	6.67	-2.11	6.83e-05	0.0006	ADAM22	ADAM metallopeptidase domain 22	Multiple_Complex
TC0200010577.hg.1	3.21	4.26	-2.07	1.87e-06	2.81e-05	ADAM23	ADAM metallopeptidase domain 23	Multiple_Complex
TC1600011569.hg.1	7.65	8.74	-2.12	4.07e-05	0.0004	ADAT1	adenosine deaminase, tRNA-specific 1	Multiple_Complex
TC0600013425.hg.1	7.45	8.94	-2.81	4.07e-05	0.0004	ADAT2	adenosine deaminase, tRNA-specific 2	Multiple_Complex
TC0200013001.hg.1	5.82	4.48	2.53	1.36e-13	8.68e-12	ADD2	adducin 2 (beta)	Multiple_Complex
TC1600008005.hg.1	3.89	8.94	-33.08	3.89e-21	8.09e-19	ADGRG1	adhesion G protein-coupled receptor G1	Multiple_Complex
TC1600008003.hg.1	4.27	7.68	-10.67	1.5e-19	2.51e-17	ADGRG5	adhesion G protein-coupled receptor G5	Multiple_Complex
TC0800012308.hg.1	7.99	9.42	-2.69	2.4e-09	7.16e-08	ADHFE1; C8orf46	alcohol dehydrogenase, iron containing 1; chromosome 8 open reading frame 46	Multiple_Complex
TC1700006877.hg.1	11.55	9.37	4.54	7.29e-23	2.08e-20	ADPRM	ADP-ribose/CDP-alcohol diphosphatase, manganese-dependent	Multiple_Complex
TC0500009046.hg.1	5.01	6.99	-3.94	5.93e-12	2.81e-10	ADRB2	adrenoceptor beta 2, surface	Coding
TC0700007370.hg.1	6.69	5.37	2.48	2.49e-09	7.37e-08	AEBP1; MIR4649	AE binding protein 1; microRNA 4649	Multiple_Complex
TC0200011188.hg.1	4.71	6.03	-2.49	1.3e-08	3.3e-07	AGAP1	ArfGAP with GTPase domain, ankyrin repeat and PH domain 1	Multiple_Complex
TC1000010509.hg.1	11.25	12.39	-2.21	0.0002	0.0017	AGAP4	ArfGAP with GTPase domain, ankyrin repeat and PH domain 4	Multiple_Complex
TC1000007598.hg.1	11.54	12.59	-2.07	0.001	0.0058	AGAP6	ArfGAP with GTPase domain, ankyrin repeat and PH domain 6	Multiple_Complex
TC0700008552.hg.1	8.91	10.4	-2.82	5.86e-08	1.29e-06	AGFG2	ArfGAP with FG repeats 2	Multiple_Complex
TC0100007784.hg.1	5.81	8.43	-6.15	1.58e-18	2.19e-16	AGO4	argonaute RISC catalytic component 4	Multiple_Complex
TC0600013794.hg.1	4.11	6.09	-3.97	6.07e-10	2.1e-08	AGPAT4	1-acylglycerol-3-phosphate O-acyltransferase 4	Multiple_Complex
TC1100011083.hg.1	4.82	6.82	-4	4.75e-12	2.3e-10	AHNAK	AHNAK nucleoprotein	Multiple_Complex
TC0600007598.hg.1	11.12	6.27	28.77	2.44e-24	8.87e-22	AIF1	allograft inflammatory factor 1	Multiple_Complex
TC0600008981.hg.1	7.59	8.99	-2.64	1e-09	3.26e-08	AIM1	absent in melanoma 1	Multiple_Complex
TC0100016086.hg.1	6.69	10.42	-13.28	2.53e-24	9.06e-22	AIM2	absent in melanoma 2	Multiple_Complex
TC0900012277.hg.1	9.85	12.09	-4.74	1.22e-07	2.48e-06	AK1	adenylate kinase 1	Coding
TC0100008618.hg.1	8.43	7.31	2.17	1.78e-05	0.0002	AK4	adenylate kinase 4	Multiple_Complex
TC0100008797.hg.1	5.84	4.82	2.02	8.33e-06	0.0001	AK5	adenylate kinase 5	Multiple_Complex
TC1500008187.hg.1	11.42	12.94	-2.85	3.1e-14	2.21e-12	AKAP13; MIR7706	A kinase (PRKA) anchor protein 13; microRNA 7706	Multiple_Complex
TC0600009446.hg.1	6.03	4.8	2.35	5.99e-09	1.63e-07	AKAP7	A kinase (PRKA) anchor protein 7	Multiple_Complex
TC0900011284.hg.1	11.54	12.74	-2.3	1.25e-08	3.19e-07	AKNA	AT-hook transcription factor	Multiple_Complex
TC1000006604.hg.1	5.42	3.81	3.04	1.72e-06	2.61e-05	AKR1E2	aldo-keto reductase family 1, member E2	Multiple_Complex
TC1900006796.hg.1	8.74	7.32	2.69	2.77e-06	3.96e-05	ALKBH7	alkB homolog 7	Multiple_Complex
TC1300006770.hg.1	12.83	15.83	-7.99	5.02e-21	1.02e-18	ALOX5AP	arachidonate 5-lipoxygenase-activating protein	Multiple_Complex
TC0400008429.hg.1	7.05	5.56	2.81	1.63e-09	5.08e-08	ALPK1	alpha kinase 1	Multiple_Complex
TC0100015200.hg.1	7.43	6.06	2.58	2.32e-13	1.41e-11	AMIGO1	adhesion molecule with Ig-like domain 1	Coding
TC0100018260.hg.1	8.04	7.03	2.01	0.0061	0.0255	AMPD2	adenosine monophosphate deaminase 2	Multiple_Complex
TC0800010252.hg.1	4.8	6.33	-2.9	2.92e-08	6.9e-07	ANK1	ankyrin 1, erythrocytic	Multiple_Complex
TC1000010727.hg.1	9.06	11.31	-4.76	1.25e-05	0.0001	ANK3	ankyrin 3, node of Ranvier (ankyrin G)	Multiple_Complex
TC1000010728.hg.1	4.79	6.19	-2.63	2.28e-05	0.0002	ANK3	Transcript Identified by AceView, Entrez Gene ID(s) 288	Unassigned
TC0500008854.hg.1	9	10.07	-2.09	0.0002	0.0014	ANKHD1; EIF4EBP3; ANKHD1-EIF4EBP3	ankyrin repeat and KH domain containing 1; eukaryotic translation initiation factor 4E binding protein 3; ANKHD1-EIF4EBP3 readthrough	Multiple_Complex
TC1100008126.hg.1	10.41	11.68	-2.42	2.85e-11	1.25e-09	ANKRD13D	ankyrin repeat domain 13 family, member D	Multiple_Complex
TC0900010056.hg.1	5.46	6.76	-2.46	4.87e-06	6.5e-05	ANKRD18A; FAM95C	ankyrin repeat domain 18A; family with sequence similarity 95, member C	Multiple_Complex
TC1000011368.hg.1	5.83	4.81	2.03	0.0051	0.022	ANKRD22	ankyrin repeat domain 22	Multiple_Complex
TC0200016712.hg.1	5.43	6.62	-2.27	1.16e-07	2.37e-06	ANKRD23	ankyrin repeat domain 23	Multiple_Complex
TC0300010413.hg.1	6.2	7.98	-3.42	3.9e-07	7.06e-06	ANKRD28	ankyrin repeat domain 28	Multiple_Complex
TC0200008534.hg.1	10.07	11.87	-3.49	1.3e-12	7.01e-11	ANKRD36	ankyrin repeat domain 36	Multiple_Complex
TC0200008536.hg.1	7.67	8.78	-2.16	3.93e-05	0.0004	ANKRD36	Transcript Identified by AceView, Entrez Gene ID(s) 375248	Unassigned
TC0200013567.hg.1	11.15	12.68	-2.87	5.29e-10	1.85e-08	ANKRD36B	ankyrin repeat domain 36B	Multiple_Complex
TC0200016710.hg.1	11.28	13.1	-3.53	1.08e-09	3.47e-08	ANKRD36C	ankyrin repeat domain 36C	Multiple_Complex
TC1200010902.hg.1	6.62	7.79	-2.25	5.3e-05	0.0005	ANKRD52	ankyrin repeat domain 52	Multiple_Complex
TC0400011144.hg.1	7.02	8.51	-2.79	1.38e-05	0.0002	ANTXR2	anthrax toxin receptor 2	Multiple_Complex
TC0900007576.hg.1	14.06	16.56	-5.65	8.31e-15	6.65e-13	ANXA1	annexin A1	Multiple_Complex
TC1500009636.hg.1	5.84	9.28	-10.84	4.32e-22	1.06e-19	ANXA2	annexin A2	Multiple_Complex
TC0500010628.hg.1	14.06	12.65	2.66	1.36e-15	1.23e-13	ANXA2R	annexin A2 receptor	Coding
TC0400011744.hg.1	8.04	9.5	-2.74	1.46e-08	3.65e-07	ANXA5	annexin A5	Multiple_Complex
TC0700010751.hg.1	8.04	12.25	-18.48	6.63e-23	1.92e-20	AOAH	acyloxyacyl hydrolase (neutrophil)	Multiple_Complex
TC1600010794.hg.1	7.84	8.98	-2.19	4.13e-08	9.55e-07	AP1G1	adaptor-related protein complex 1, gamma 1 subunit	Multiple_Complex
TC1400010718.hg.1	7.24	8.66	-2.69	7.25e-08	1.55e-06	AP1G2	adaptor-related protein complex 1, gamma 2 subunit	Multiple_Complex
TC1700007599.hg.1	9.57	10.74	-2.25	1.08e-08	2.79e-07	AP2B1	adaptor-related protein complex 2, beta 1 subunit	Multiple_Complex
TC1900009208.hg.1	8.09	9.4	-2.47	7.63e-06	9.63e-05	AP3D1	adaptor-related protein complex 3, delta 1 subunit	Multiple_Complex
TC0800007431.hg.1	9.14	11.06	-3.77	1.38e-11	6.3e-10	AP3M2	adaptor-related protein complex 3, mu 2 subunit	Multiple_Complex
TC1200008574.hg.1	6.37	7.48	-2.16	2.1e-07	4.04e-06	APAF1	apoptotic peptidase activating factor 1	Multiple_Complex
TC1500006683.hg.1	10.97	9.44	2.89	2.37e-08	5.72e-07	APBA2	amyloid beta (A4) precursor protein-binding, family A, member 2	Multiple_Complex
TC1100009969.hg.1	8.06	6.89	2.25	3.83e-09	1.1e-07	APBB1	amyloid beta (A4) precursor protein-binding, family B, member 1 (Fe65)	Multiple_Complex
TC0300007386.hg.1	4.81	5.94	-2.19	3.57e-07	6.53e-06	APEH	acylaminoacyl-peptide hydrolase	Multiple_Complex
TC0200016464.hg.1	9.32	8.15	2.25	0.0001	0.0009	APLF	aprataxin and PNKP like factor	Multiple_Complex
TC1100009521.hg.1	6.72	7.9	-2.26	8.55e-05	0.0008	APLP2	amyloid beta (A4) precursor-like protein 2	Multiple_Complex
TC2000008721.hg.1	8.7	11.96	-9.57	2.16e-26	1.05e-23	APMAP	adipocyte plasma membrane associated protein	Multiple_Complex
TC2200009271.hg.1	11.35	13.57	-4.65	8.35e-21	1.63e-18	APOBEC3C	apolipoprotein B mRNA editing enzyme, catalytic polypeptide-like 3C	Multiple_Complex
TC2200009272.hg.1	8.13	10.27	-4.41	3.03e-17	3.37e-15	APOBEC3D	apolipoprotein B mRNA editing enzyme, catalytic polypeptide-like 3D	Coding
TC2200009274.hg.1	9.59	12.34	-6.7	4.91e-22	1.2e-19	APOBEC3G	apolipoprotein B mRNA editing enzyme, catalytic polypeptide-like 3G	Multiple_Complex
TC2200007382.hg.1	4.88	6.95	-4.21	1.41e-09	4.46e-08	APOBEC3H	apolipoprotein B mRNA editing enzyme, catalytic polypeptide-like 3H	Multiple_Complex
TC2100007803.hg.1	8.73	7.61	2.17	1.26e-06	1.99e-05	APP	amyloid beta (A4) precursor protein	Multiple_Complex
TC0900009860.hg.1	8.6	7.33	2.4	1.59e-11	7.21e-10	AQP3	aquaporin 3 (Gill blood group)	Multiple_Complex
TC0400012917.hg.1	9.58	11.88	-4.92	2.26e-18	2.93e-16	ARAP2	ArfGAP with RhoGAP domain, ankyrin repeat and PH domain 2	Multiple_Complex
TC0400012916.hg.1	6.21	8.35	-4.41	4.64e-10	1.65e-08	ARAP2	ArfGAP with RhoGAP domain, ankyrin repeat and PH domain 2	NonCoding
TC2200009356.hg.1	8.99	10.06	-2.1	1.43e-05	0.0002	ARFGAP3	ADP-ribosylation factor GTPase activating protein 3	Multiple_Complex
TC1500010707.hg.1	5.42	7.46	-4.12	6.74e-13	3.83e-11	ARHGAP11B	Rho GTPase activating protein 11B	Multiple_Complex
TC1500010709.hg.1	4.57	6.09	-2.87	2.52e-09	7.45e-08	ARHGAP11B	Rho GTPase activating protein 11B	NonCoding
TC1500006785.hg.1	5.05	6.49	-2.71	6.05e-09	1.64e-07	ARHGAP11B; ARHGAP11A	Rho GTPase activating protein 11B; Rho GTPase activating protein 11A	Multiple_Complex
TC0600013147.hg.1	4.67	6.62	-3.86	8.78e-13	4.89e-11	ARHGAP18	Rho GTPase activating protein 18	Multiple_Complex
TC1000010065.hg.1	6.13	7.39	-2.4	4.25e-08	9.73e-07	ARHGAP21	Rho GTPase activating protein 21	Multiple_Complex
TC0200007900.hg.1	9.36	11.28	-3.8	2.92e-12	1.46e-10	ARHGAP25	Rho GTPase activating protein 25	Multiple_Complex
TC0500008941.hg.1	7.99	10.34	-5.09	1.24e-22	3.29e-20	ARHGAP26	Rho GTPase activating protein 26	Multiple_Complex
TC1900008399.hg.1	7.34	9.4	-4.16	4.27e-17	4.61e-15	ARHGAP35	Rho GTPase activating protein 35	Multiple_Complex
TC1200010967.hg.1	9.94	11.17	-2.36	4.5e-06	6.06e-05	ARHGAP9	Rho GTPase activating protein 9	Multiple_Complex
TC1100009287.hg.1	5.53	7.11	-2.98	2.08e-08	5.08e-07	ARHGEF12	Rho guanine nucleotide exchange factor (GEF) 12	Multiple_Complex
TC1000007761.hg.1	7.68	11.45	-13.67	8.67e-26	3.96e-23	ARID5B	AT rich interactive domain 5B (MRF1-like)	Multiple_Complex
TC1100013037.hg.1	11.71	10.37	2.54	1.8e-09	5.56e-08	ARL2	ADP-ribosylation factor like GTPase 2	Multiple_Complex
TC0200016739.hg.1	4.44	5.52	-2.11	4.85e-05	0.0005	ARL5A	ADP-ribosylation factor like GTPase 5A	NonCoding
TC1100011643.hg.1	9.85	7.93	3.79	2.83e-09	8.32e-08	ARRB1	arrestin, beta 1	Multiple_Complex
TC1900007358.hg.1	9.15	6.53	6.17	5.07e-15	4.25e-13	ARRDC2	arrestin domain containing 2	Multiple_Complex
TC1200007594.hg.1	6.35	3.88	5.55	2.37e-21	5.08e-19	ASIC1	acid sensing ion channel 1	Multiple_Complex
TC0200016645.hg.1	10.27	11.42	-2.23	9.64e-09	2.52e-07	ASXL2	additional sex combs like transcriptional regulator 2	Multiple_Complex
TC0600014267.hg.1	11.6	12.72	-2.17	9.46e-08	1.97e-06	ATF6B	activating transcription factor 6 beta	Multiple_Complex
TC1200006935.hg.1	10.31	12	-3.23	1.75e-13	1.09e-11	ATF7IP	activating transcription factor 7 interacting protein	Multiple_Complex
TSUnmapped00000109.hg.1	9.28	10.5	-2.32	6.45e-05	0.0006	ATG16L1	autophagy related 16-like 1	NonCoding
TC1400010100.hg.1	6.86	7.98	-2.17	0.0001	0.001	ATG2B	autophagy related 2B	Multiple_Complex
TC1100008985.hg.1	13.99	12.81	2.27	5.01e-07	8.82e-06	ATM	ATM serine/threonine kinase	Multiple_Complex
TC0100010543.hg.1	5.12	6.13	-2.01	0.0005	0.0035	ATP1B1	ATPase, Na+/K+ transporting, beta 1 polypeptide	Multiple_Complex
TC1200008835.hg.1	7.25	8.29	-2.05	3.98e-05	0.0004	ATP2A2	ATPase, Ca++ transporting, cardiac muscle, slow twitch 2	Multiple_Complex
TC1700006602.hg.1	5.75	6.78	-2.04	6.12e-06	7.95e-05	ATP2A3	Memczak2013 ANTISENSE, CDS, coding, INTERNAL best transcript NM_174956	NonCoding
TC1200011474.hg.1	7.61	8.61	-2	0.0003	0.0023	ATP2B1	ATPase, Ca++ transporting, plasma membrane 1	Multiple_Complex
TC0100011267.hg.1	12.42	15.21	-6.9	4.71e-21	9.62e-19	ATP2B4	ATPase, Ca++ transporting, plasma membrane 4	Multiple_Complex
TC0600010921.hg.1	7.52	9.26	-3.35	5.46e-12	2.62e-10	ATXN1	ataxin 1	Multiple_Complex
TC0600010936.hg.1	5.27	6.52	-2.38	1.94e-05	0.0002	ATXN1	Memczak2013 ALT_ACCEPTOR, ALT_DONOR, coding, INTERNAL, intronic best transcript NM_000332	NonCoding
TC1600011426.hg.1	9.38	11.06	-3.2	3.64e-12	1.8e-10	ATXN1L	ataxin 1-like	Multiple_Complex
TC0700012165.hg.1	7.8	9.04	-2.36	1.06e-08	2.76e-07	ATXN7L1	ataxin 7-like 1	Multiple_Complex
TC0700007905.hg.1	6.15	10.97	-28.14	1.94e-30	1.54e-27	AUTS2	autism susceptibility candidate 2	Multiple_Complex
TC0100016794.hg.1	5.63	7.63	-3.98	7.04e-11	2.88e-09	B3GALT2	UDP-Gal:betaGlcNAc beta 1,3-galactosyltransferase 2	Coding
TC1100012930.hg.1	3.97	5.29	-2.5	8.1e-08	1.72e-06	B3GAT1	beta-1,3-glucuronyltransferase 1	Multiple_Complex
TC2000009392.hg.1	5.43	7.22	-3.46	1.04e-13	6.79e-12	B4GALT5	UDP-Gal:betaGlcNAc beta 1,4- galactosyltransferase, polypeptide 5	Multiple_Complex
TC0600012562.hg.1	6.55	5.55	2	0.0002	0.0013	BACH2	Memczak2013 ALT_ACCEPTOR, ALT_DONOR, coding, INTERNAL, intronic best transcript NM_001170794	NonCoding
TC0600012554.hg.1	7.45	6.31	2.2	6.32e-07	1.09e-05	BACH2	BTB and CNC homology 1, basic leucine zipper transcription factor 2	Multiple_Complex
TC0600012556.hg.1	7.48	6.2	2.43	1.41e-05	0.0002	BACH2	Transcript Identified by AceView, Entrez Gene ID(s) 60468	Unassigned
TC1600008799.hg.1	10.57	11.64	-2.09	1.43e-09	4.5e-08	BANP	BTG3 associated nuclear protein	Multiple_Complex
TC0200014719.hg.1	6.61	8.69	-4.22	1.29e-14	9.92e-13	BAZ2B	bromodomain adjacent to zinc finger domain 2B	Multiple_Complex
TC0200014725.hg.1	5.89	6.99	-2.15	9.48e-08	1.97e-06	BAZ2B	bromodomain adjacent to zinc finger domain 2B	NonCoding
TC1400007712.hg.1	9.6	10.8	-2.3	9.83e-06	0.0001	BATF	basic leucine zipper transcription factor, ATF-like	Multiple_Complex
TC1500010184.hg.1	11.5	9.95	2.92	9.92e-07	1.61e-05	BCL2A1	BCL2-related protein A1	Coding
TC0100009788.hg.1	10.26	9.11	2.23	1.04e-12	5.63e-11	BCL9	B-cell CLL/lymphoma 9	Multiple_Complex
TC0X00009427.hg.1	8.54	9.63	-2.12	1.54e-06	2.36e-05	BCOR	BCL6 corepressor	Multiple_Complex
TC0X00008394.hg.1	8.22	9.42	-2.29	2.34e-05	0.0003	BCORL1	BCL6 corepressor-like 1	Multiple_Complex
TC0X00010409.hg.1	8.74	7.49	2.38	3.42e-08	8.01e-07	BEX2	brain expressed X-linked 2	Coding
TC0X00007999.hg.1	9.94	7.85	4.25	7.85e-16	7.32e-14	BEX4	brain expressed X-linked 4	Multiple_Complex
TC0X00010382.hg.1	10.24	8.57	3.19	1.5e-14	1.13e-12	BEX5	brain expressed X-linked 5	Multiple_Complex
TC0300006483.hg.1	11.73	12.78	-2.06	5.88e-08	1.29e-06	BHLHE40	basic helix-loop-helix family, member e40	Multiple_Complex
TC1200010703.hg.1	10.94	11.97	-2.04	6.07e-08	1.33e-06	BIN2	bridging integrator 2	Multiple_Complex
TC1000008315.hg.1	7.71	9.19	-2.8	2.06e-13	1.27e-11	BMPR1A	bone morphogenetic protein receptor type IA	Multiple_Complex
TC0500013283.hg.1	9.05	10.19	-2.21	9.57e-06	0.0001	BRD9	bromodomain containing 9	Multiple_Complex
TC0100011695.hg.1	10.12	11.15	-2.05	2.42e-07	4.59e-06	BROX	BRO1 domain and CAAX motif containing	Multiple_Complex
TC0700006781.hg.1	7.52	6.05	2.77	1.93e-10	7.28e-09	BZW2	basic leucine zipper and W2 domains 2	Multiple_Complex
TC1200008743.hg.1	8.46	6.95	2.83	2.88e-09	8.42e-08	BTBD11	BTB (POZ) domain containing 11	Multiple_Complex
TC0600007307.hg.1	8.06	9.24	-2.26	4.51e-06	6.08e-05	BTN2A1	butyrophilin, subfamily 2, member A1	Multiple_Complex
TC0600007301.hg.1	16.5	17.53	-2.04	2.51e-08	6.05e-07	BTN3A2	butyrophilin, subfamily 3, member A2	Multiple_Complex
TC1000010483.hg.1	5.74	4.6	2.2	1.55e-09	4.87e-08	C10orf25	chromosome 10 open reading frame 25	Multiple_Complex
TC1000011662.hg.1	7.62	8.65	-2.05	0.0004	0.003	C10orf76	chromosome 10 open reading frame 76	Multiple_Complex
TC1100009040.hg.1	10.68	8.65	4.09	1.75e-17	2.03e-15	C11orf1	chromosome 11 open reading frame 1	Coding
TC1100009335.hg.1	5.79	7.23	-2.71	2.36e-09	7.08e-08	C11orf63	chromosome 11 open reading frame 63	Multiple_Complex
TC1200006656.hg.1	15.71	13.83	3.67	1.42e-18	2.02e-16	C12orf57; RNU7-1	chromosome 12 open reading frame 57; RNA, U7 small nuclear 1	Multiple_Complex
TC1200009235.hg.1	12.97	11.89	2.11	2.93e-09	8.54e-08	C12orf65	chromosome 12 open reading frame 65	Multiple_Complex
TC1200012700.hg.1	6.71	10.8	-17.04	2.31e-25	9.93e-23	C12orf75	chromosome 12 open reading frame 75	Multiple_Complex
TC1700011205.hg.1	7.39	8.77	-2.59	2.84e-08	6.74e-07	C17orf67	chromosome 17 open reading frame 67	Multiple_Complex
TC1800007218.hg.1	7.94	9.03	-2.12	0.002	0.0106	C18orf25	chromosome 18 open reading frame 25	Multiple_Complex
TC1800006891.hg.1	9.38	10.89	-2.85	6.88e-13	3.89e-11	C18orf8	chromosome 18 open reading frame 8	Multiple_Complex
TC1900011675.hg.1	14.96	13.89	2.09	1.27e-08	3.23e-07	C19orf53	chromosome 19 open reading frame 53	Coding
TC0100010887.hg.1	6.22	10.8	-23.83	7.22e-32	6.74e-29	C1orf21	chromosome 1 open reading frame 21	Multiple_Complex
TC1700012341.hg.1	10.22	8.82	2.65	4.78e-11	2.01e-09	C1QBP	complement component 1, q subcomponent binding protein	Multiple_Complex
TC1200012745.hg.1	6.49	7.51	-2.02	0.0011	0.0065	C1RL	complement component 1, r subcomponent-like	Multiple_Complex
TC2000008218.hg.1	5.71	7.28	-2.97	4.93e-08	1.11e-06	C20orf194	chromosome 20 open reading frame 194	Multiple_Complex
TC0200009350.hg.1	6.71	5.57	2.2	1.85e-06	2.79e-05	C2orf27A	chromosome 2 open reading frame 27A	Multiple_Complex
TC1200009807.hg.1	5.27	6.63	-2.57	8.02e-07	1.34e-05	C3AR1	complement component 3a receptor 1	Coding
TC0400008424.hg.1	9.38	7.48	3.73	1.13e-11	5.21e-10	C4orf32	chromosome 4 open reading frame 32	Coding
TC0600013144.hg.1	4.23	5.31	-2.11	2.25e-07	4.29e-06	C6orf191andARHGAP18; RP1-69D17.4; RP1-69D17.3; TCONS_l2_00025470; TCONS_l2_00024911; LAMA2	Transcript Identified by AceView, Entrez Gene ID(s) 93663; 253582; Jeck2013 ALT_ACCEPTOR, ALT_DONOR, downstream_end, ncRNA, OVEXON, upstream_start best transcript TCONS_l2_00025470; Jeck2013 ALT_ACCEPTOR, ncRNA, OVEXON, upstream_start best transcript TCONS_l2_00024911; Salzman2013 ANTISENSE, CDS, coding, downstream_end, intronic, OVCODE, OVEXON, UTR3 best transcript NM_000426; Salzman2013 ANNOTAT…	NonCoding
TC0600007617.hg.1	16.68	15.66	2.04	1.17e-13	7.57e-12	C6orf48; SNORD52; SNORD48	chromosome 6 open reading frame 48; small nucleolar RNA, C/D box 52; small nucleolar RNA, C/D box 48	Multiple_Complex
TC0100006761.hg.1	7.01	5.03	3.96	5.01e-13	2.88e-11	CA6	carbonic anhydrase VI	Multiple_Complex
TC0100008602.hg.1	4.41	3.11	2.45	2.23e-11	9.89e-10	CACHD1	cache domain containing 1	Multiple_Complex
TC1700010563.hg.1	8.13	10.03	-3.73	3.5e-15	2.98e-13	CACNB1	calcium channel, voltage-dependent, beta 1 subunit	Multiple_Complex
TC1200007535.hg.1	6.56	8.64	-4.24	2.25e-13	1.37e-11	CACNB3	calcium channel, voltage-dependent, beta 3 subunit	Multiple_Complex
TC1100012389.hg.1	4.32	7.92	-12.16	1.44e-18	2.04e-16	CADM1	cell adhesion molecule 1	Multiple_Complex
TC1200010812.hg.1	9.02	10.54	-2.86	4.82e-12	2.33e-10	CALCOCO1	calcium binding and coiled-coil domain 1	Multiple_Complex
TC1000011718.hg.1	6.63	8.72	-4.26	3.53e-17	3.86e-15	CALHM2	calcium homeostasis modulator 2	Multiple_Complex
TC0100013182.hg.1	8.67	9.73	-2.09	4.68e-07	8.34e-06	CAMK2N1	calcium/calmodulin-dependent protein kinase II inhibitor 1	Multiple_Complex
TC0100011721.hg.1	9.67	11.71	-4.11	2.48e-12	1.27e-10	CAPN2	calpain 2, (m/II) large subunit	Multiple_Complex
TC1500010725.hg.1	6.89	8.08	-2.27	0.0025	0.0128	CAPN3	calpain 3	Multiple_Complex
TC1200010265.hg.1	9.78	10.97	-2.29	6.1e-11	2.51e-09	CAPRIN2	caprin family member 2	Multiple_Complex
TC1100013221.hg.1	9.72	10.72	-2.01	1.06e-06	1.72e-05	CASP1	caspase 1	Multiple_Complex
TC0200010445.hg.1	8.47	6.21	4.78	2.64e-13	1.59e-11	CASP10	caspase 10	Multiple_Complex
TC0700009488.hg.1	10.46	11.69	-2.35	0.0001	0.0012	CASP2	caspase 2	Multiple_Complex
TC1400010776.hg.1	4.65	6.7	-4.15	4.89e-10	1.73e-08	CATSPERB	catsper channel auxiliary subunit beta	Multiple_Complex
TC0300011899.hg.1	12.08	13.18	-2.15	5.32e-09	1.47e-07	CBLB	Cbl proto-oncogene B, E3 ubiquitin protein ligase	Multiple_Complex
TC2100007037.hg.1	8.94	6.99	3.86	2.04e-14	1.5e-12	CBR3	carbonyl reductase 3	Multiple_Complex
TC1900007150.hg.1	6.22	7.52	-2.45	3.26e-06	4.56e-05	CC2D1A	coiled-coil and C2 domain containing 1A	Multiple_Complex
TC0700009065.hg.1	4.93	6.31	-2.61	9.77e-08	2.03e-06	CCDC136	coiled-coil domain containing 136	Multiple_Complex
TC0300012216.hg.1	8.77	9.89	-2.18	2.28e-07	4.36e-06	CCDC14	coiled-coil domain containing 14	Multiple_Complex
TC0700013394.hg.1	7.11	8.27	-2.24	1.22e-05	0.0001	CCDC146	coiled-coil domain containing 146	Multiple_Complex
TC0300012186.hg.1	10.9	9.8	2.16	6.87e-05	0.0006	CCDC58	coiled-coil domain containing 58	Multiple_Complex
TSUnmapped00000725.hg.1	5.15	6.66	-2.84	4.21e-05	0.0004	CCDC84	coiled-coil domain containing 84	NonCoding
TSUnmapped00000268.hg.1	7.35	8.67	-2.5	0.0004	0.0028	CCDC84	coiled-coil domain containing 84	NonCoding
TSUnmapped00000104.hg.1	9.69	10.83	-2.2	0.0008	0.005	CCDC84	coiled-coil domain containing 84	Coding
TSUnmapped00000045.hg.1	8.72	9.8	-2.1	0.0012	0.0071	CCDC84	coiled-coil domain containing 84	Coding
TSUnmapped00000747.hg.1	5.66	6.68	-2.02	0.0014	0.0078	CCDC84	coiled-coil domain containing 84	NonCoding
TC1700010461.hg.1	4.97	6.32	-2.55	1.19e-05	0.0001	CCL3L3; CCL3L1	chemokine (C-C motif) ligand 3-like 3; chemokine (C-C motif) ligand 3-like 1	Multiple_Complex
TC1700007620.hg.1	5.46	9.08	-12.31	3.92e-19	6e-17	CCL4L2; CCL4; CCL4L1	chemokine (C-C motif) ligand 4-like 2; chemokine (C-C motif) ligand 4; chemokine (C-C motif) ligand 4-like 1	Multiple_Complex
TC1700007626.hg.1	5.97	7.52	-2.93	7.4e-05	0.0007	CCL4L2; CCL4L1	chemokine (C-C motif) ligand 4-like 2; chemokine (C-C motif) ligand 4-like 1	Multiple_Complex
TC1700010447.hg.1	7.79	12.67	-29.48	3.16e-30	2.42e-27	CCL5	chemokine (C-C motif) ligand 5	Coding
TC0600011809.hg.1	14.27	12.97	2.47	2.72e-11	1.2e-09	CCND3	cyclin D3	Multiple_Complex
TC1900007688.hg.1	6.65	5.23	2.68	6.49e-09	1.75e-07	CCNE1	cyclin E1	Multiple_Complex
TC0300007256.hg.1	4.31	5.54	-2.36	2.17e-09	6.61e-08	CCR2	chemokine (C-C motif) receptor 2	Multiple_Complex
TC0300006985.hg.1	4.61	10.17	-47.16	2.56e-26	1.22e-23	CCR4	chemokine (C-C motif) receptor 4	Coding
TC0300007257.hg.1	5.23	9.8	-23.85	3.06e-27	1.69e-24	CCR5	chemokine (C-C motif) receptor 5 (gene/pseudogene)	Multiple_Complex
TC1700010630.hg.1	18.23	15.85	5.19	5e-14	3.43e-12	CCR7	chemokine (C-C motif) receptor 7	Coding
TC0300007259.hg.1	5.79	6.82	-2.03	0.0001	0.0009	CCRL2	chemokine (C-C motif) receptor-like 2	Multiple_Complex
TC1100006494.hg.1	4.65	5.84	-2.28	0.0006	0.0037	CD151	CD151 molecule (Raph blood group)	Multiple_Complex
TC0100009742.hg.1	4.23	5.35	-2.17	5.11e-05	0.0005	CD160	CD160 molecule	Multiple_Complex
TC1800008977.hg.1	6.73	9.03	-4.89	1.32e-08	3.34e-07	CD226	CD226 molecule	Multiple_Complex
TC0100016145.hg.1	4.66	6.74	-4.22	1.57e-13	1e-11	CD244	CD244 molecule, natural killer cell receptor 2B4	Multiple_Complex
TC1100011282.hg.1	10.57	5.74	28.45	9.21e-40	3.29e-36	CD248	CD248 molecule, endosialin	Coding
TC1200012583.hg.1	11.27	9.65	3.06	2.37e-10	8.75e-09	CD27	CD27 molecule	Multiple_Complex
TC1700008852.hg.1	7.26	9.63	-5.17	8.32e-11	3.35e-09	CD300A	CD300a molecule	Multiple_Complex
TC0100011406.hg.1	15.12	13.77	2.55	8.37e-15	6.67e-13	CD55	CD55 molecule, decay accelerating factor for complement (Cromer blood group)	Multiple_Complex
TC0100015397.hg.1	8.45	11.7	-9.57	6e-27	3.14e-24	CD58	CD58 molecule	Multiple_Complex
TC1200010866.hg.1	12.76	14.11	-2.56	1.93e-10	7.28e-09	CD63	CD63 molecule	Multiple_Complex
TC1900009439.hg.1	4.32	6.44	-4.34	2.07e-16	2.03e-14	CD70	CD70 molecule	Multiple_Complex
TC0900009944.hg.1	4.69	6.23	-2.91	3.47e-07	6.36e-06	CD72	CD72 molecule	Multiple_Complex
TC0500012470.hg.1	12.3	13.5	-2.29	1.41e-08	3.55e-07	CD74	CD74 molecule, major histocompatibility complex, class II invariant chain	Multiple_Complex
TC1900008166.hg.1	7	5.96	2.06	3.93e-11	1.69e-09	CD79A	CD79a molecule, immunoglobulin-associated alpha	Multiple_Complex
TC1100006576.hg.1	8.5	9.81	-2.48	1.07e-08	2.77e-07	CD81	CD81 molecule	Multiple_Complex
TC1100007394.hg.1	6.27	7.37	-2.14	0.0002	0.0015	CD82	CD82 molecule	Multiple_Complex
TC0100016137.hg.1	8.37	10.9	-5.75	9.18e-14	6.06e-12	CD84	CD84 molecule	Multiple_Complex
TC0200013323.hg.1	10.61	12.07	-2.75	1.39e-10	5.38e-09	CD8A	CD8a molecule	Multiple_Complex
TC0Y00006476.hg.1	11.93	13.61	-3.2	6.73e-19	9.96e-17	CD99	Homo sapiens CD99 molecule (CD99), transcript variant 2, mRNA.; Homo sapiens CD99 molecule (CD99), transcript variant 3, mRNA.; Homo sapiens CD99 molecule (CD99), transcript variant 1, mRNA.; CD99 molecule [Source:HGNC Symbol;Acc:HGNC:7082]; Homo sapiens CD99 molecule, mRNA (cDNA clone MGC:2282 IMAGE:3161673), complete cds.; Homo sapiens CD99 molecule, mRNA (cDNA clone MGC:3938 IMAGE:2906143), co…	Multiple_Complex
TC0X00006477.hg.1	12.34	13.97	-3.08	2.22e-18	2.9e-16	CD99	CD99 molecule	Multiple_Complex
TC0100009215.hg.1	11.75	12.75	-2.01	6.2e-05	0.0006	CDC14A	cell division cycle 14A	Multiple_Complex
TC0900012256.hg.1	6.07	8.11	-4.1	9.64e-11	3.84e-09	CDC14B	cell division cycle 14B	Multiple_Complex
TC0200016648.hg.1	8.4	9.52	-2.18	3.86e-12	1.89e-10	CDC42EP3	CDC42 effector protein (Rho GTPase binding) 3	Coding
TC0200016649.hg.1	8.1	5.33	6.83	0.003	0.0147	CDC42EP3	CDC42 effector protein (Rho GTPase binding) 3	NonCoding
TC0500013227.hg.1	11.2	12.72	-2.86	0.0002	0.0015	CDC42SE2	CDC42 small effector 2	NonCoding
TC0500013225.hg.1	10.27	11.42	-2.22	1.18e-08	3.02e-07	CDC42SE2	CDC42 small effector 2	NonCoding
TC0100009020.hg.1	6.75	8.07	-2.51	2.99e-07	5.56e-06	CDC7	cell division cycle 7	Multiple_Complex
TC0200009994.hg.1	3.68	5.63	-3.86	3.98e-13	2.33e-11	CDCA7	cell division cycle associated 7	Multiple_Complex
TC0700010435.hg.1	9.34	6.18	8.95	1.06e-22	2.87e-20	CDCA7L	cell division cycle associated 7-like	Multiple_Complex
TC1600008209.hg.1	4.39	6.19	-3.47	2.78e-09	8.17e-08	CDH1	cadherin 1, type 1	Multiple_Complex
TC0X00007132.hg.1	7	8.24	-2.36	1.08e-05	0.0001	CDK16	cyclin-dependent kinase 16	Multiple_Complex
TC1700012277.hg.1	6.07	7.63	-2.94	2.49e-07	4.72e-06	CDK5RAP3	CDK5 regulatory subunit associated protein 3	Multiple_Complex
TC0700011785.hg.1	7.34	8.4	-2.09	8e-09	2.12e-07	CDK6	cyclin-dependent kinase 6	Multiple_Complex
TC1400009128.hg.1	6.3	7.58	-2.43	1.59e-07	3.12e-06	CDKL1	cyclin-dependent kinase-like 1 (CDC2-related kinase)	Multiple_Complex
TC0600007847.hg.1	6.1	7.54	-2.71	1.29e-08	3.26e-07	CDKN1A	cyclin-dependent kinase inhibitor 1A (p21, Cip1)	Multiple_Complex
TC0900012219.hg.1	4.53	6.4	-3.67	1.66e-13	1.05e-11	CDKN2A	cyclin-dependent kinase inhibitor 2A	Multiple_Complex
TC1000006768.hg.1	12.23	13.61	-2.6	0.0015	0.0083	CELF2	Transcript Identified by AceView, Entrez Gene ID(s) 10659	Unassigned
TC1000006754.hg.1	13.48	14.78	-2.45	1.53e-08	3.82e-07	CELF2	CUGBP, Elav-like family member 2	Multiple_Complex
TC1600010656.hg.1	6.65	8.33	-3.2	8.26e-09	2.18e-07	CENPT	centromere protein T	Multiple_Complex
TC1400009829.hg.1	4.47	6.43	-3.89	6.8e-10	2.32e-08	CEP128	centrosomal protein 128kDa	Multiple_Complex
TC1100009175.hg.1	7.29	8.31	-2.02	3.39e-07	6.24e-06	CEP164	centrosomal protein 164kDa	Multiple_Complex
TC0300013719.hg.1	8.02	6.86	2.23	1.05e-05	0.0001	CEP19	centrosomal protein 19kDa	Multiple_Complex
TC0700012602.hg.1	6	4.99	2.01	7.31e-07	1.24e-05	CEP41	centrosomal protein 41kDa	Multiple_Complex
TC0900007663.hg.1	7.16	8.37	-2.31	6.82e-06	8.73e-05	CEP78	centrosomal protein 78kDa	Multiple_Complex
TC0200009895.hg.1	10.01	6.24	13.59	7.44e-25	2.9e-22	CERS6	ceramide synthase 6	Multiple_Complex
TC1600008139.hg.1	6.07	7.15	-2.11	0.0038	0.0174	CES4A	carboxylesterase 4A	Multiple_Complex
TC0100011064.hg.1	4.57	6.04	-2.76	3.23e-09	9.34e-08	CFH	complement factor H	Multiple_Complex
TC0200010443.hg.1	13.59	15.7	-4.33	4.88e-19	7.42e-17	CFLAR	CASP8 and FADD like apoptosis regulator	Multiple_Complex
TC0800007697.hg.1	11.94	10.68	2.38	5.86e-08	1.29e-06	CHCHD7	coiled-coil-helix-coiled-coil-helix domain containing 7	Multiple_Complex
TC1600007874.hg.1	7.95	9.03	-2.12	2.32e-07	4.41e-06	CHD9	chromodomain helicase DNA binding protein 9	Multiple_Complex
TC2200009365.hg.1	9.33	10.77	-2.72	1.24e-06	1.97e-05	CHKB	choline kinase beta	Multiple_Complex
TC0800007013.hg.1	9.67	7.64	4.1	3.07e-17	3.4e-15	CHMP7	charged multivesicular body protein 7	Multiple_Complex
TC0200015002.hg.1	4.76	6.22	-2.74	2.86e-06	4.06e-05	CHN1	chimerin 1	Multiple_Complex
TC1500010841.hg.1	4.99	6.22	-2.33	4.87e-08	1.1e-06	CHRFAM7A	CHRNA7 (cholinergic receptor, nicotinic, alpha 7, exons 5-10) and FAM7A (family with sequence similarity 7A, exons A-E) fusion	Multiple_Complex
TC0800010297.hg.1	5.38	4.05	2.51	8.86e-08	1.85e-06	CHRNA6	cholinergic receptor, nicotinic alpha 6	Multiple_Complex
TC1200008683.hg.1	9.41	11.76	-5.09	3.24e-15	2.8e-13	CHST11	carbohydrate (chondroitin 4) sulfotransferase 11	Multiple_Complex
TC1200008685.hg.1	5.15	7.29	-4.38	7.64e-11	3.11e-09	CHST11	Transcript Identified by AceView, Entrez Gene ID(s) 50515	Unassigned
TC1200008686.hg.1	6.3	8.22	-3.79	5.89e-09	1.6e-07	CHST11	Transcript Identified by AceView, Entrez Gene ID(s) 50515	Unassigned
TC0700013327.hg.1	7.78	9.73	-3.85	2.78e-15	2.43e-13	CHST12	carbohydrate (chondroitin 4) sulfotransferase 12	Coding
TC0100009900.hg.1	6.88	4.87	4.03	2.5e-12	1.27e-10	CIART	circadian associated repressor of transcription	Multiple_Complex
TC1400008752.hg.1	9.7	10.74	-2.05	4.78e-07	8.48e-06	CIDEB	cell death-inducing DFFA-like effector b	Multiple_Complex
TC1600006888.hg.1	5.91	8.42	-5.68	2.48e-17	2.77e-15	CIITA	class II, major histocompatibility complex, transactivator	Multiple_Complex
TC1900006524.hg.1	12.76	11.41	2.54	1.24e-07	2.52e-06	CIRBP	cold inducible RNA binding protein	Multiple_Complex
TC0100010100.hg.1	10.06	8.64	2.68	1.3e-06	2.04e-05	CKS1B	CDC28 protein kinase regulatory subunit 1B	Multiple_Complex
TC0200014091.hg.1	10.09	11.11	-2.03	2.31e-05	0.0002	CLASP1	cytoplasmic linker associated protein 1	Multiple_Complex
TC1100013192.hg.1	4.63	6.18	-2.93	4.7e-10	1.67e-08	CLCF1	cardiotrophin-like cytokine factor 1	Coding
TC0300014020.hg.1	15.07	17.08	-4.03	1.37e-19	2.32e-17	CLDND1	claudin domain containing 1	Multiple_Complex
TC1900012017.hg.1	6.52	7.59	-2.1	1.39e-08	3.51e-07	CLDND2	claudin domain containing 2	Coding
TC1200009875.hg.1	6.42	8.18	-3.38	2.06e-10	7.74e-09	CLECL1	C-type lectin-like 1	Coding
TC0600014265.hg.1	11.91	13.08	-2.25	1.46e-08	3.65e-07	CLIC1	chloride intracellular channel 1	Coding
TC0900012024.hg.1	4.73	5.9	-2.25	7.37e-05	0.0007	CLIC3	chloride intracellular channel 3	Multiple_Complex
TC1200012234.hg.1	6.81	8.15	-2.52	2.86e-12	1.44e-10	CLIP1	CAP-GLY domain containing linker protein 1	Multiple_Complex
TC1300007549.hg.1	9.65	7.44	4.61	2.12e-16	2.08e-14	CLN5	ceroid-lipofuscinosis, neuronal 5	Multiple_Complex
TC1100011719.hg.1	14.28	13.1	2.26	2.12e-12	1.11e-10	CLNS1A	chloride channel, nucleotide-sensitive, 1A	Multiple_Complex
TC1200006670.hg.1	8.91	10.39	-2.79	2.16e-17	2.45e-15	CLSTN3	calsyntenin 3	Multiple_Complex
TC1600011343.hg.1	6.99	5.51	2.79	4.09e-09	1.16e-07	CLUAP1	clusterin associated protein 1	Multiple_Complex
TC0300006894.hg.1	9.9	14	-17.1	2.15e-23	6.87e-21	CMC1	C-x(9)-C motif containing 1	Multiple_Complex
TC1600008585.hg.1	12.3	13.72	-2.67	1.96e-05	0.0002	CMIP	c-Maf inducing protein	Multiple_Complex
TC1200011838.hg.1	4.33	5.39	-2.09	0.0012	0.0069	CMKLR1	chemerin chemokine-like receptor 1	Multiple_Complex
TC1600011407.hg.1	6.97	8.43	-2.74	7.88e-13	4.41e-11	CMTM1	CKLF-like MARVEL transmembrane domain containing 1	Coding
TC0X00006758.hg.1	9.11	7.02	4.27	2.02e-18	2.7e-16	CNKSR2	connector enhancer of kinase suppressor of Ras 2	Multiple_Complex
TC0100014995.hg.1	8.05	4.23	14.14	3.63e-27	1.95e-24	CNN3	calponin 3, acidic	Multiple_Complex
TC0200016496.hg.1	7	8.41	-2.66	5.47e-08	1.22e-06	CNNM3	cyclin and CBS domain divalent metal cation transport mediator 3	Multiple_Complex
TC0100016664.hg.1	4.29	5.98	-3.22	4.6e-08	1.05e-06	COLGALT2	collagen beta(1-O)galactosyltransferase 2	Multiple_Complex
TC1600011060.hg.1	8.62	10.35	-3.33	2.42e-09	7.19e-08	COTL1	coactosin-like F-actin binding protein 1	Multiple_Complex
TC1600008709.hg.1	12.53	11.05	2.79	5.78e-11	2.39e-09	COX4I1	cytochrome c oxidase subunit IV isoform 1	Multiple_Complex
TC1200010397.hg.1	6.38	8.25	-3.65	1.51e-10	5.82e-09	CPNE8	copine VIII	Multiple_Complex
TC0300014021.hg.1	7.54	8.97	-2.7	5.22e-09	1.44e-07	CPOX	coproporphyrinogen oxidase	Multiple_Complex
TC0700012734.hg.1	6.93	8.66	-3.31	6.74e-15	5.52e-13	CREB3L2	cAMP responsive element binding protein 3-like 2	Multiple_Complex
TC0200007237.hg.1	5.35	8.01	-6.35	2.49e-23	7.74e-21	CRIM1	cysteine rich transmembrane BMP regulator 1 (chordin-like)	Multiple_Complex
TC0400006519.hg.1	8.27	9.92	-3.13	6.71e-06	8.62e-05	CRIPAK	cysteine-rich PAK1 inhibitor	Coding
TC1500008317.hg.1	11.19	9.92	2.41	1.56e-12	8.28e-11	CRTC3	CREB regulated transcription coactivator 3	Multiple_Complex
TC0300014084.hg.1	6.82	8.39	-2.98	3.5e-05	0.0004	CRYGS	crystallin gamma S	Multiple_Complex
TC0800009782.hg.1	5.12	6.13	-2.02	0.0005	0.0033	CSGALNACT1	chondroitin sulfate N-acetylgalactosaminyltransferase 1	Multiple_Complex
TC2000007005.hg.1	6.87	13.43	-94.45	1.27e-38	3.9e-35	CST7	cystatin F (leukocystatin)	Coding
TC0200010525.hg.1	5.28	6.28	-2.01	0.0138	0.0475	CTLA4	cytotoxic T-lymphocyte-associated protein 4	Multiple_Complex
TC0500008794.hg.1	3.57	5.24	-3.19	2.1e-06	3.09e-05	CTNNA1	catenin (cadherin-associated protein), alpha 1	Multiple_Complex
TC1100011888.hg.1	7.63	8.93	-2.47	8.7e-11	3.5e-09	CTSC	cathepsin C	Multiple_Complex
TC0300010775.hg.1	3.66	6.88	-9.32	2.48e-13	1.5e-11	CX3CR1	chemokine (C-X3-C motif) receptor 1	Coding
TC1700009528.hg.1	8.57	7.39	2.27	5.26e-05	0.0005	CXCL16	chemokine (C-X-C motif) ligand 16	Multiple_Complex
TC0X00010005.hg.1	8.58	10.09	-2.84	2.27e-10	8.44e-09	CXCR3	chemokine (C-X-C motif) receptor 3	Coding
TC1100009225.hg.1	4.94	6.65	-3.27	2.25e-11	9.97e-10	CXCR5	chemokine (C-X-C motif) receptor 5	Coding
TC0300007251.hg.1	5.99	8.78	-6.91	8.85e-22	2e-19	CXCR6	chemokine (C-X-C motif) receptor 6	Multiple_Complex
TC0X00009328.hg.1	6.97	5.33	3.1	2.26e-09	6.82e-08	CXorf21	chromosome X open reading frame 21	Coding
TC0X00009980.hg.1	10.33	11.42	-2.12	0.0049	0.0213	CXorf65	chromosome X open reading frame 65	Multiple_Complex
TC1800009029.hg.1	12.66	11.26	2.64	1.35e-09	4.28e-08	CYB5A	cytochrome b5 type A (microsomal)	Multiple_Complex
TC1600011220.hg.1	12.92	14.24	-2.5	3.39e-17	3.73e-15	CYBA	cytochrome b-245, alpha polypeptide	Multiple_Complex
TC0100014365.hg.1	5.61	4.07	2.91	2.84e-12	1.43e-10	CYP2J2	cytochrome P450, family 2, subfamily J, polypeptide 2	Multiple_Complex
TC0400012874.hg.1	6.66	7.99	-2.52	2.21e-05	0.0002	CYP4V2	cytochrome P450, family 4, subfamily V, polypeptide 2	Multiple_Complex
TC0X00010141.hg.1	5.12	6.49	-2.57	4.61e-05	0.0005	CYSLTR1	cysteinyl leukotriene receptor 1	Multiple_Complex
TC0700010189.hg.1	6.14	10	-14.55	1.52e-19	2.53e-17	CYTH3	cytohesin 3	Multiple_Complex
TC1400007328.hg.1	6.58	8.01	-2.7	3.15e-09	9.12e-08	DAAM1	dishevelled associated activator of morphogenesis 1	Multiple_Complex
TC1200009590.hg.1	9.69	11.05	-2.56	2.3e-12	1.19e-10	DCP1B	decapping mRNA 1B	Multiple_Complex
TC1100009689.hg.1	7.35	6.31	2.04	9.53e-06	0.0001	DEAF1	DEAF1 transcription factor	Multiple_Complex
TC0100016839.hg.1	6.37	8.24	-3.67	2.21e-12	1.15e-10	DENND1B	DENN/MADD domain containing 1B	Multiple_Complex
TC0800009094.hg.1	6.59	8.78	-4.58	6.02e-15	4.99e-13	DENND3	DENN/MADD domain containing 3	Multiple_Complex
TC1100010058.hg.1	8.12	6.89	2.35	5.7e-07	9.85e-06	DENND5A	DENN/MADD domain containing 5A	Multiple_Complex
TC2200007109.hg.1	6.24	7.27	-2.04	0.0001	0.0011	DEPDC5	DEP domain containing 5	Multiple_Complex
TC1100007220.hg.1	6.6	5.43	2.25	5.59e-07	9.69e-06	DEPDC7	DEP domain containing 7	Multiple_Complex
TC0900011286.hg.1	6.63	8.85	-4.66	1.39e-14	1.06e-12	DFNB31	deafness, autosomal recessive 31	Multiple_Complex
TC0100012921.hg.1	10.34	7.6	6.68	1.37e-22	3.6e-20	DHRS3; MIR6730	dehydrogenase/reductase (SDR family) member 3; microRNA 6730	Multiple_Complex
TC1000012164.hg.1	7.42	6.09	2.52	2.17e-09	6.61e-08	DHX32	DEAH (Asp-Glu-Ala-His) box polypeptide 32	Multiple_Complex
TC0500012280.hg.1	9.22	10.27	-2.06	4.7e-07	8.37e-06	DIAPH1	diaphanous-related formin 1	Multiple_Complex
TC0X00007889.hg.1	8.1	9.51	-2.65	8.37e-12	3.93e-10	DIAPH2	diaphanous-related formin 2	Multiple_Complex
TC1100010123.hg.1	5.92	6.97	-2.08	0.0006	0.0042	DKK3	dickkopf WNT signaling pathway inhibitor 3	Multiple_Complex
TC1300007197.hg.1	4.74	6.1	-2.56	2.91e-07	5.43e-06	DLEU1	deleted in lymphocytic leukemia 1 (non-protein coding)	Multiple_Complex
TC1300008938.hg.1	6.72	8.25	-2.88	5.96e-08	1.31e-06	DLEU2; MIR15A; MIR16-1; MIR3613	deleted in lymphocytic leukemia 2 (non-protein coding); microRNA 15a; microRNA 16-1; microRNA 3613	Multiple_Complex
TC0X00007540.hg.1	6.81	7.92	-2.15	1.1e-05	0.0001	DLG3	discs, large homolog 3 (Drosophila)	Multiple_Complex
TC1700009619.hg.1	7.66	6.35	2.49	3.06e-08	7.21e-07	DLG4	discs, large homolog 4 (Drosophila)	Multiple_Complex
TC0600014031.hg.1	7	5.7	2.47	1.66e-08	4.11e-07	DLL1	delta-like 1 (Drosophila)	Multiple_Complex
TC1900011984.hg.1	4.57	6.23	-3.15	1.45e-09	4.56e-08	DMPK	dystrophia myotonica-protein kinase	Multiple_Complex
TC0300007474.hg.1	9.01	10.16	-2.22	2.51e-07	4.75e-06	DNAH1	dynein, axonemal, heavy chain 1	Multiple_Complex
TC0200016643.hg.1	9.94	8.44	2.83	6.83e-10	2.33e-08	DNMT3A	DNA (cytosine-5-)-methyltransferase 3 alpha	Multiple_Complex
TC0600011870.hg.1	13.08	11.28	3.46	1.62e-09	5.04e-08	DNPH1	2-deoxynucleoside 5-phosphate N-hydrolase 1	Multiple_Complex
TC0100014408.hg.1	7.07	8.45	-2.6	7.72e-08	1.64e-06	DOCK7	dedicator of cytokinesis 7	Multiple_Complex
TC0800009819.hg.1	7.22	11.71	-22.45	3.49e-33	4.06e-30	DOK2	docking protein 2	Multiple_Complex
TC0700010716.hg.1	6.6	7.84	-2.36	1.52e-07	3.01e-06	DPY19L1	dpy-19-like 1 (C. elegans)	Multiple_Complex
TC0800007086.hg.1	7.02	8.93	-3.76	2.55e-12	1.3e-10	DPYSL2	dihydropyrimidinase-like 2	Multiple_Complex
TC1800008387.hg.1	5.29	4.18	2.16	5.18e-08	1.16e-06	DSC1	desmocollin 1	Coding
TC0400007225.hg.1	4.88	9.53	-25.06	3.47e-29	2.4e-26	DTHD1	death domain containing 1	Multiple_Complex
TC0100017420.hg.1	8.34	10.53	-4.57	6.51e-17	6.88e-15	DUSP10	dual specificity phosphatase 10	Multiple_Complex
TC1200009967.hg.1	10.31	11.76	-2.73	4.25e-12	2.07e-10	DUSP16	dual specificity phosphatase 16	Multiple_Complex
TSUnmapped00000374.hg.1	10.97	12.34	-2.59	3.63e-10	1.32e-08	DUSP16	dual specificity phosphatase 16	Coding
TSUnmapped00000088.hg.1	9.11	10.47	-2.56	3.12e-11	1.35e-09	DUSP16	dual specificity phosphatase 16	Coding
TSUnmapped00000107.hg.1	12.42	13.76	-2.52	7.14e-08	1.53e-06	DUSP16	dual specificity phosphatase 16	Coding
TSUnmapped00000353.hg.1	8.76	10.06	-2.47	1.23e-10	4.83e-09	DUSP16	dual specificity phosphatase 16	Coding
TC0200013511.hg.1	8.88	12.12	-9.44	1.8e-20	3.38e-18	DUSP2	dual specificity phosphatase 2	Multiple_Complex
TC0600006441.hg.1	8.33	9.67	-2.52	5.83e-06	7.64e-05	DUSP22	dual specificity phosphatase 22	Multiple_Complex
TC0800010002.hg.1	6.74	11.02	-19.34	6.8e-22	1.57e-19	DUSP4	dual specificity phosphatase 4	Multiple_Complex
TC1000008891.hg.1	6.54	8.87	-5.05	5.94e-15	4.94e-13	DUSP5	dual specificity phosphatase 5	Multiple_Complex
TC0300009692.hg.1	6.7	7.77	-2.1	2.58e-05	0.0003	DVL3	dishevelled segment polarity protein 3	Multiple_Complex
TC1400008341.hg.1	9.43	10.44	-2	0.0011	0.0064	DYNC1H1	dynein, cytoplasmic 1, heavy chain 1	Multiple_Complex
TC1100008927.hg.1	4.88	6.05	-2.24	0.0016	0.0088	DYNC2H1	dynein, cytoplasmic 2, heavy chain 1	Multiple_Complex
TC0600007138.hg.1	6.85	8.02	-2.25	1.89e-11	8.5e-10	E2F3	E2F transcription factor 3	Multiple_Complex
TC0100012093.hg.1	5.08	6.97	-3.71	2.13e-14	1.56e-12	EDARADD	EDAR-associated death domain	Multiple_Complex
TC0200010567.hg.1	14.08	12.31	3.43	3.85e-12	1.89e-10	EEF1B2; SNORA41	eukaryotic translation elongation factor 1 beta 2; small nucleolar RNA, H/ACA box 41	Multiple_Complex
TC0X00009493.hg.1	5.2	4.08	2.17	2.18e-07	4.18e-06	EFHC2	EF-hand domain (C-terminal) containing 2	Multiple_Complex
TC0100006982.hg.1	7.48	9.75	-4.83	6.6e-17	6.94e-15	EFHD2	EF-hand domain family member D2	Coding
TC0100010111.hg.1	5.64	4.64	2	8.98e-05	0.0008	EFNA1	ephrin-A1	Multiple_Complex
TC0500011648.hg.1	3.82	5.3	-2.79	1.49e-06	2.28e-05	EFNA5	ephrin-A5	Multiple_Complex
TC1400010731.hg.1	7.49	5.8	3.23	2.66e-07	5e-06	EGLN3	egl-9 family hypoxia-inducible factor 3	NonCoding
TC1500007174.hg.1	9.32	10.57	-2.38	1.75e-09	5.41e-08	EID1	EP300 interacting inhibitor of differentiation 1	Multiple_Complex
TC0100017100.hg.1	10.87	9.41	2.75	1.43e-16	1.44e-14	EIF2D	eukaryotic translation initiation factor 2D	Multiple_Complex
TC2000008910.hg.1	6.8	8.22	-2.69	5.68e-05	0.0005	EIF2S2	Zhang2013 ALT_ACCEPTOR, ALT_DONOR, coding, INTERNAL, intronic best transcript NM_003908	NonCoding
TC0800012451.hg.1	14.18	12.86	2.51	1.31e-07	2.64e-06	EIF3E	eukaryotic translation initiation factor 3, subunit E	Multiple_Complex
TC0800007316.hg.1	6.66	7.75	-2.12	0.0005	0.0033	EIF4EBP1	eukaryotic translation initiation factor 4E binding protein 1	Multiple_Complex
TC1000007925.hg.1	11.99	13.38	-2.61	3.97e-08	9.2e-07	EIF4EBP2	eukaryotic translation initiation factor 4E binding protein 2	Multiple_Complex
TC0100013194.hg.1	7.91	9.33	-2.68	3.06e-10	1.12e-08	EIF4G3	eukaryotic translation initiation factor 4 gamma, 3	Multiple_Complex
TC0X00010799.hg.1	7.39	8.61	-2.32	5.35e-08	1.19e-06	ELF4	E74-like factor 4 (ets domain transcription factor)	Multiple_Complex
TC1900010017.hg.1	6.81	7.87	-2.09	7.6e-08	1.62e-06	ELL	elongation factor RNA polymerase II	Multiple_Complex
TC0600012072.hg.1	9.85	11.08	-2.36	3.85e-09	1.1e-07	ELOVL5	ELOVL fatty acid elongase 5	Multiple_Complex
TC0500010670.hg.1	10.18	11.25	-2.1	1.25e-08	3.19e-07	EMB	embigin	Multiple_Complex
TC1600006566.hg.1	6.47	8.07	-3.04	8.46e-10	2.81e-08	EME2	essential meiotic structure-specific endonuclease subunit 2	Multiple_Complex
TC0200007353.hg.1	13.52	15.69	-4.5	5.17e-14	3.52e-12	EML4	echinoderm microtubule associated protein like 4	Multiple_Complex
TC0500011146.hg.1	4.41	5.51	-2.16	1.19e-07	2.43e-06	ENC1	ectodermal-neural cortex 1 (with BTB domain)	Multiple_Complex
TC0600011943.hg.1	5.71	7.6	-3.69	8.22e-08	1.74e-06	ENPP5	ectonucleotide pyrophosphatase/phosphodiesterase 5 (putative)	Multiple_Complex
TC1000012482.hg.1	5.08	7.91	-7.13	1.16e-07	2.37e-06	ENTPD1	ectonucleoside triphosphate diphosphohydrolase 1	Multiple_Complex
TC0300011448.hg.1	5.72	6.93	-2.31	2.55e-07	4.82e-06	EOGT	EGF domain-specific O-linked N-acetylglucosamine (GlcNAc) transferase	Multiple_Complex
TC0300010566.hg.1	7.02	12.29	-38.54	5.7e-33	6.11e-30	EOMES	eomesodermin	Coding
TC1200009461.hg.1	8.92	10.3	-2.6	2.82e-05	0.0003	EP400; SNORA49	E1A binding protein p400; small nucleolar RNA, H/ACA box 49	Multiple_Complex
TC0600013165.hg.1	10.32	9.19	2.18	8.35e-06	0.0001	EPB41L2	erythrocyte membrane protein band 4.1-like 2	Multiple_Complex
TC0700012886.hg.1	6.22	5.19	2.04	5.15e-05	0.0005	EPHA1	EPH receptor A1	Multiple_Complex
TC0200015815.hg.1	5.35	7.1	-3.37	5.13e-13	2.94e-11	EPHA4	EPH receptor A4	Multiple_Complex
TC0200015816.hg.1	4.08	5.27	-2.29	1.63e-05	0.0002	EPHA4	Transcript Identified by AceView, Entrez Gene ID(s) 2043	Unassigned
TC0800007110.hg.1	7.32	5.19	4.39	1.47e-14	1.11e-12	EPHX2	epoxide hydrolase 2, cytoplasmic	Multiple_Complex
TC1700012207.hg.1	4.84	6.05	-2.31	1.04e-06	1.68e-05	EPN2; EPN2-IT1	epsin 2; EPN2 intronic transcript 1	Multiple_Complex
TC0100014175.hg.1	7.06	9.21	-4.44	2.88e-16	2.78e-14	EPS15	epidermal growth factor receptor pathway substrate 15	Multiple_Complex
TC0800009331.hg.1	14.38	13.19	2.28	6.31e-07	1.08e-05	ERICH1	glutamate rich 1	Multiple_Complex
TC1700011436.hg.1	7.66	11.62	-15.59	6.19e-32	6.03e-29	ERN1	endoplasmic reticulum to nucleus signaling 1	Multiple_Complex
TC0700011318.hg.1	6.73	8.23	-2.82	3.44e-08	8.04e-07	ERV3-1; ZNF117	endogenous retrovirus group 3, member 1; zinc finger protein 117	Multiple_Complex
TC1300008855.hg.1	11.42	9.99	2.69	1.28e-10	5.01e-09	ESD	esterase D	Multiple_Complex
TC0700012959.hg.1	8.27	9.47	-2.31	5.19e-08	1.16e-06	EZH2	enhancer of zeste 2 polycomb repressive complex 2 subunit	Multiple_Complex
TC1900010851.hg.1	8.85	7.84	2.02	3.24e-06	4.53e-05	ETHE1	ethylmalonic encephalopathy 1	Multiple_Complex
TC1200006850.hg.1	11.67	13	-2.51	3.95e-06	5.41e-05	ETV6	ets variant 6	Multiple_Complex
TC2200007013.hg.1	10.28	11.29	-2.01	1.13e-05	0.0001	EWSR1	EWS RNA binding protein 1	Multiple_Complex
TC1900010746.hg.1	6.24	5.21	2.05	8.41e-06	0.0001	EXOSC5	exosome component 5	Multiple_Complex
TC0300013822.hg.1	11.03	10.01	2.02	1.95e-07	3.79e-06	EXOSC7	exosome component 7	Multiple_Complex
TC0500007831.hg.1	6.62	8.87	-4.75	5.41e-22	1.29e-19	F2R	coagulation factor II (thrombin) receptor	Multiple_Complex
TC0500011194.hg.1	5.29	7.29	-4	6.44e-10	2.21e-08	F2RL2	coagulation factor II (thrombin) receptor-like 2	Coding
TC0100016356.hg.1	5.33	6.34	-2.02	0.0012	0.0069	F5	coagulation factor V (proaccelerin, labile factor)	Multiple_Complex
TC0X00011226.hg.1	4.56	6.28	-3.28	8.16e-09	2.16e-07	F8	coagulation factor VIII, procoagulant component	Multiple_Complex
TC1100011050.hg.1	4.97	6.16	-2.29	0.0001	0.001	FADS1; MIR1908	fatty acid desaturase 1; microRNA 1908	Multiple_Complex
TC1100011052.hg.1	5.98	7	-2.03	5.24e-07	9.18e-06	FADS3	fatty acid desaturase 3	Multiple_Complex
TC1000009865.hg.1	6.69	8.02	-2.51	6.32e-08	1.37e-06	FAM107B	Memczak2013 ALT_ACCEPTOR, ALT_DONOR, coding, INTERNAL, intronic best transcript NM_031453	NonCoding
TC1100007728.hg.1	9.28	10.63	-2.55	1.95e-06	2.9e-05	FAM111A	family with sequence similarity 111, member A	Multiple_Complex
TC0200010502.hg.1	12.85	10.78	4.18	2.61e-12	1.32e-10	FAM117B	family with sequence similarity 117, member B	Multiple_Complex
TC0100016678.hg.1	6.5	11.96	-43.91	5.06e-36	8.35e-33	FAM129A	family with sequence similarity 129, member A	Multiple_Complex
TC0500010199.hg.1	7.08	4.98	4.28	1.57e-15	1.4e-13	FAM134B	family with sequence similarity 134, member B	Multiple_Complex
TC0400011299.hg.1	6.72	7.97	-2.38	7.97e-07	1.34e-05	FAM13A	family with sequence similarity 13, member A	Multiple_Complex
TC0500013418.hg.1	7.65	6.03	3.08	1.26e-06	1.99e-05	FAM153A	family with sequence similarity 153, member A	Multiple_Complex
TC0500013417.hg.1	10.36	8.58	3.44	0.0018	0.0098	FAM153A	family with sequence similarity 153, member A	NonCoding
TC0500013268.hg.1	7.49	5.82	3.19	7.05e-06	8.97e-05	FAM153B	family with sequence similarity 153, member B	Multiple_Complex
TC0500013269.hg.1	7.84	6.02	3.51	7.92e-06	9.97e-05	FAM153B	family with sequence similarity 153, member B	NonCoding
TC0500013273.hg.1	8.11	6.33	3.43	7.76e-06	9.78e-05	FAM153C	family with sequence similarity 153, member C, pseudogene	Multiple_Complex
TC1100009962.hg.1	7.53	8.77	-2.35	4.26e-11	1.81e-09	FAM160A2	family with sequence similarity 160, member A2	Multiple_Complex
TC1000008984.hg.1	5.42	6.46	-2.06	8.14e-09	2.15e-07	FAM160B1	family with sequence similarity 160, member B1	Multiple_Complex
TC0400011208.hg.1	8.98	7.8	2.26	1.26e-08	3.2e-07	FAM175A	family with sequence similarity 175, member A	Multiple_Complex
TC0500012980.hg.1	8.65	10.07	-2.66	4.16e-05	0.0004	FAM193B	family with sequence similarity 193, member B	Multiple_Complex
TC1600011322.hg.1	10.11	8.35	3.39	2.92e-11	1.27e-09	FAM195A	family with sequence similarity 195, member A	Multiple_Complex
TC1000008234.hg.1	8.44	6.85	3.01	3.18e-12	1.59e-10	FAM213A	family with sequence similarity 213, member A	Multiple_Complex
TC1200008843.hg.1	9.6	8.11	2.81	9.29e-11	3.72e-09	FAM216A	family with sequence similarity 216, member A	Multiple_Complex
TC0100013610.hg.1	6	7.25	-2.38	3.56e-07	6.52e-06	FAM229A	family with sequence similarity 229, member A	Multiple_Complex
TC0600009169.hg.1	7.15	5.66	2.8	1.25e-08	3.18e-07	FAM229B	family with sequence similarity 229, member B	Coding
TC0600014318.hg.1	6.91	5.87	2.06	7.43e-07	1.26e-05	FAM46A	family with sequence similarity 46, member A	Coding
TC0100009572.hg.1	6.18	7.96	-3.43	1.04e-16	1.06e-14	FAM46C	family with sequence similarity 46, member C	Coding
TC0200011837.hg.1	6.58	8.48	-3.72	7.11e-11	2.9e-09	FAM49A	family with sequence similarity 49, member A	Multiple_Complex
TC1000012130.hg.1	6.43	9.48	-8.28	3.67e-19	5.67e-17	FAM53B	Memczak2013 ALT_ACCEPTOR, ALT_DONOR, coding, INTERNAL, intronic best transcript NM_014661	NonCoding
TC1000012603.hg.1	6	8.97	-7.88	1.06e-17	1.27e-15	FAM53B	family with sequence similarity 53, member B	Multiple_Complex
TC0800008758.hg.1	7.15	8.2	-2.07	1.34e-05	0.0002	FAM91A1	family with sequence similarity 91, member A1	Multiple_Complex
TC1100006906.hg.1	8.64	9.78	-2.21	1.41e-06	2.18e-05	FAR1	fatty acyl CoA reductase 1	Multiple_Complex
TC0200015838.hg.1	10.39	9.2	2.28	4.35e-09	1.22e-07	FARSB	phenylalanyl-tRNA synthetase beta subunit	Multiple_Complex
TC1000008388.hg.1	8.3	10.77	-5.53	4.44e-20	7.88e-18	FAS	Fas cell surface death receptor	Multiple_Complex
TC0100010625.hg.1	4.64	6.46	-3.52	4.25e-12	2.07e-10	FASLG	Fas ligand (TNF superfamily, member 6)	Coding
TSUnmapped00000162.hg.1	14.79	13.79	2	3.45e-09	9.93e-08	FBL	fibrillarin	Coding
TSUnmapped00000380.hg.1	13.15	12.11	2.05	3.66e-11	1.57e-09	FBL	fibrillarin	Coding
TSUnmapped00000344.hg.1	15.36	14.28	2.11	1.87e-15	1.65e-13	FBL	fibrillarin	Coding
TSUnmapped00000776.hg.1	15.55	14.44	2.16	4.03e-15	3.4e-13	FBL	fibrillarin	Coding
TC1900010675.hg.1	14.97	13.85	2.18	1.52e-12	8.09e-11	FBL	fibrillarin	Multiple_Complex
TSUnmapped00000427.hg.1	15.49	14.34	2.23	9.16e-17	9.4e-15	FBL	fibrillarin	Coding
TSUnmapped00000349.hg.1	15.57	14.4	2.25	2.17e-17	2.45e-15	FBL	fibrillarin	Coding
TC1700010565.hg.1	8.44	9.67	-2.34	6.78e-05	0.0006	FBXL20	F-box and leucine-rich repeat protein 20	Multiple_Complex
TC0900012227.hg.1	5.23	6.34	-2.16	3e-09	8.72e-08	FBXO10	F-box protein 10	Multiple_Complex
TC1800009026.hg.1	5.42	3.97	2.74	2.57e-11	1.14e-09	FBXO15	F-box protein 15	Multiple_Complex
TC0400012143.hg.1	8.24	9.26	-2.03	1.06e-05	0.0001	FBXW7	F-box and WD repeat domain containing 7, E3 ubiquitin protein ligase	Multiple_Complex
TC0100010341.hg.1	8.32	6.45	3.65	8.77e-07	1.45e-05	FCER1G	Fc fragment of IgE, high affinity I, receptor for; gamma polypeptide	Multiple_Complex
TC1900010676.hg.1	7.96	6.62	2.52	6.94e-08	1.49e-06	FCGBP	Fc fragment of IgG binding protein	Multiple_Complex
TSUnmapped00000392.hg.1	7.16	5.81	2.53	4.02e-09	1.14e-07	FCGBP	Fc fragment of IgG binding protein	Coding
TC0100016185.hg.1	4.61	5.83	-2.33	0.0002	0.0016	FCGR3A	Fc fragment of IgG, low affinity IIIa, receptor (CD16a)	Multiple_Complex
TC0500007758.hg.1	4.46	5.97	-2.84	2.08e-10	7.81e-09	FCHO2	FCH domain only 2	Multiple_Complex
TC0100017110.hg.1	14.33	11.96	5.18	6.67e-15	5.48e-13	FCMR	Fc fragment of IgM receptor	Multiple_Complex
TC0100016049.hg.1	5.95	11.21	-38.48	6.89e-17	7.17e-15	FCRL3	Fc receptor-like 3	Multiple_Complex
TC1100007938.hg.1	6.89	8.07	-2.27	1.77e-05	0.0002	FERMT3	fermitin family member 3	Multiple_Complex
TC1100012708.hg.1	3.9	5.38	-2.79	1.52e-06	2.33e-05	FEZ1	fasciculation and elongation protein zeta 1	Multiple_Complex
TC1700012183.hg.1	7.7	4.63	8.39	5.66e-23	1.66e-20	FGF11	fibroblast growth factor 11	Multiple_Complex
TC0400012902.hg.1	8.77	13.51	-26.8	7.14e-14	4.79e-12	FGFBP2	fibroblast growth factor binding protein 2	Coding
TC0700011584.hg.1	5.55	7.11	-2.96	0.0001	0.0009	FGL2	fibrinogen-like 2	Multiple_Complex
TC0100013761.hg.1	6.93	5.81	2.16	1.99e-06	2.96e-05	FHL3	four and a half LIM domains 3	Multiple_Complex
TC0700012044.hg.1	13.18	11.97	2.31	1.07e-07	2.2e-06	FIS1	fission, mitochondrial 1	Multiple_Complex
TC1100007941.hg.1	8.38	7.29	2.14	0.003	0.0144	FKBP2	FK506 binding protein 2	Multiple_Complex
TC0X00011194.hg.1	10.57	12.64	-4.21	5.85e-13	3.35e-11	FLNA	filamin A, alpha	Multiple_Complex
TC0X00008826.hg.1	8.16	9.9	-3.34	1.28e-06	2.02e-05	FLNA	Jeck2013 ANTISENSE, CDS, coding, INTERNAL, OVCODE, OVEXON best transcript NM_001110556	NonCoding
TC0X00008827.hg.1	5.65	7.17	-2.88	4.27e-07	7.65e-06	FLNA	Memczak2013 ANTISENSE, CDS, coding, INTERNAL best transcript NM_001456	NonCoding
TC0200007096.hg.1	7.37	10.07	-6.51	3.89e-12	1.9e-10	FOSL2	FOS-like antigen 2	Multiple_Complex
TC0300011502.hg.1	8	6.82	2.27	0.0054	0.0232	FOXP1; RP11-298C2.1	Transcript Identified by AceView, Entrez Gene ID(s) 27086; novel transcript, sense intronic to FOXP1	NonCoding
TC0X00009667.hg.1	4.39	5.49	-2.15	2.42e-06	3.51e-05	FOXP3	forkhead box P3	Coding
TC0600008006.hg.1	5.72	7.77	-4.13	1.7e-13	1.07e-11	FOXP4; MIR4641	forkhead box P4; microRNA 4641	Multiple_Complex
TC0X00008070.hg.1	4.39	6.89	-5.67	3.56e-20	6.41e-18	FRMPD3	FERM and PDZ domain containing 3	Multiple_Complex
TC0300010933.hg.1	8.41	10.83	-5.33	2.74e-18	3.52e-16	FYCO1	FYVE and coiled-coil domain containing 1	Multiple_Complex
TC0600012875.hg.1	12.47	14.73	-4.8	5.14e-19	7.76e-17	FYN	FYN proto-oncogene, Src family tyrosine kinase	Multiple_Complex
TC0X00011221.hg.1	6.87	11.05	-18.16	8.82e-34	1.18e-30	GAB3	GRB2-associated binding protein 3	Multiple_Complex
TC1200006787.hg.1	12.43	13.98	-2.93	1.85e-16	1.84e-14	GABARAPL1	GABA(A) receptor-associated protein like 1	Multiple_Complex
TC0700011977.hg.1	5.97	4.16	3.52	3.3e-19	5.27e-17	GAL3ST4	galactose-3-O-sulfotransferase 4	Multiple_Complex
TC0200007296.hg.1	6.36	9.53	-9	1.15e-21	2.58e-19	GALM	galactose mutarotase (aldose 1-epimerase)	Multiple_Complex
TC1600011235.hg.1	7.78	9.06	-2.42	5.03e-07	8.84e-06	GALNS	galactosamine (N-acetyl)-6-sulfatase	Multiple_Complex
TC0200014809.hg.1	4	6.34	-5.06	5.07e-20	8.91e-18	GALNT3	polypeptide N-acetylgalactosaminyltransferase 3	Multiple_Complex
TC1000006707.hg.1	8.26	9.41	-2.22	1.79e-11	8.09e-10	GATA3	GATA binding protein 3	Multiple_Complex
TC1500010864.hg.1	6.06	4.78	2.43	4.36e-07	7.79e-06	GATM	glycine amidinotransferase (L-arginine:glycine amidinotransferase)	Multiple_Complex
TC1000008716.hg.1	10.4	11.58	-2.28	1.01e-06	1.64e-05	GBF1	golgi brefeldin A resistant guanine nucleotide exchange factor 1	Multiple_Complex
TC0900012141.hg.1	3.82	5.13	-2.49	6.85e-10	2.33e-08	GCNT1	glucosaminyl (N-acetyl) transferase 1, core 2	Multiple_Complex
TC0300011988.hg.1	9.25	8.14	2.15	0.003	0.0144	GCSAM	germinal center-associated, signaling and motility	Coding
TC0100015434.hg.1	7.43	8.5	-2.09	4e-05	0.0004	GDAP2	ganglioside induced differentiation associated protein 2	Multiple_Complex
TC1600009953.hg.1	8.02	9.12	-2.14	0.0017	0.009	GDPD3	glycerophosphodiester phosphodiesterase domain containing 3	Multiple_Complex
TC1100011652.hg.1	5.1	6.44	-2.53	2.31e-09	6.97e-08	GDPD5	glycerophosphodiester phosphodiesterase domain containing 5	Multiple_Complex
TC0200007297.hg.1	9.16	8.12	2.05	1.01e-05	0.0001	GEMIN6	gem nuclear organelle associated protein 6	Multiple_Complex
TC0500013089.hg.1	3.92	5.03	-2.17	5.83e-05	0.0005	GFPT2	glutamine-fructose-6-phosphate transaminase 2	Multiple_Complex
TC1600009737.hg.1	11.63	13.52	-3.7	1.5e-15	1.35e-13	GGA2	golgi-associated, gamma adaptin ear containing, ARF binding protein 2	Multiple_Complex
TC2200008078.hg.1	8.71	10.64	-3.8	2.83e-12	1.43e-10	GGT2	gamma-glutamyltransferase 2	Multiple_Complex
TC0600012502.hg.1	5.7	7.04	-2.53	1.31e-07	2.64e-06	GJB7	gap junction protein beta 7	Multiple_Complex
TC0X00006891.hg.1	5.75	6.83	-2.11	2.53e-07	4.78e-06	GK	glycerol kinase	Multiple_Complex
TC0300012664.hg.1	6.93	8.52	-3.01	3.83e-09	1.1e-07	GK5	glycerol kinase 5 (putative)	Multiple_Complex
TC0900010580.hg.1	9.77	8.77	2.01	0.0004	0.003	GKAP1	G kinase anchoring protein 1	Multiple_Complex
TC1100009618.hg.1	5.49	6.85	-2.57	1.98e-07	3.84e-06	GLB1L2	galactosidase beta 1 like 2	Multiple_Complex
TC0700013338.hg.1	6.6	8.03	-2.69	1.93e-12	1.02e-10	GLCCI1	glucocorticoid induced 1	Multiple_Complex
TC1200008224.hg.1	10.05	11.9	-3.61	1.65e-17	1.94e-15	GLIPR1	GLI pathogenesis-related 1	Multiple_Complex
TC0900007115.hg.1	6.13	8.81	-6.42	7.3e-20	1.25e-17	GLIPR2	GLI pathogenesis-related 2	Multiple_Complex
TC0500011497.hg.1	10.37	9.12	2.37	3.02e-08	7.13e-07	GLRX	glutaredoxin	Multiple_Complex
TC1200011885.hg.1	8.27	9.3	-2.04	2.81e-06	4.01e-05	GLTP	glycolipid transfer protein	Coding
TC0600014126.hg.1	7.73	8.82	-2.12	6.06e-06	7.9e-05	GLTSCR1L	GLTSCR1-like	Multiple_Complex
TC1900008433.hg.1	15.37	14.32	2.07	6.64e-05	0.0006	GLTSCR2; SNORD23	glioma tumor suppressor candidate region gene 2; small nucleolar RNA, C/D box 23	Multiple_Complex
TC0100016625.hg.1	7.5	10.26	-6.75	2.6e-24	9.15e-22	GLUL	glutamate-ammonia ligase	Multiple_Complex
TC0600014215.hg.1	8.99	7.99	2.01	1.55e-07	3.05e-06	GMDS	GDP-mannose 4,6-dehydratase	Multiple_Complex
TC0200010852.hg.1	7.63	9.04	-2.66	5.19e-10	1.82e-08	GMPPA	GDP-mannose pyrophosphorylase A	Multiple_Complex
TC0300013980.hg.1	6.13	7.14	-2	3.4e-05	0.0003	GMPPB	GDP-mannose pyrophosphorylase B	Multiple_Complex
TC1900006616.hg.1	7.74	6.02	3.28	3.7e-13	2.18e-11	GNA11	guanine nucleotide binding protein (G protein), alpha 11 (Gq class)	Multiple_Complex
TC1900006620.hg.1	5.05	6.16	-2.15	0.0002	0.0014	GNA15	guanine nucleotide binding protein (G protein), alpha 15 (Gq class)	Multiple_Complex
TC1600007944.hg.1	7.09	10.37	-9.73	8.71e-25	3.33e-22	GNAO1	guanine nucleotide binding protein (G protein), alpha activating activity polypeptide O	Multiple_Complex
TC1400007154.hg.1	10.25	12.3	-4.13	7.62e-23	2.15e-20	GNG2	guanine nucleotide binding protein (G protein), gamma 2	Multiple_Complex
TC1900009240.hg.1	9.23	7.38	3.6	1.07e-07	2.2e-06	GNG7	guanine nucleotide binding protein (G protein), gamma 7	Coding
TC1700011032.hg.1	5.67	7.44	-3.41	1.12e-10	4.43e-09	GNGT2	guanine nucleotide binding protein (G protein), gamma transducing activity polypeptide 2	Coding
TC0600011368.hg.1	8.31	7.2	2.16	2.08e-05	0.0002	GNL1	guanine nucleotide binding protein-like 1	Multiple_Complex
TC0200008268.hg.1	8.02	16.36	-323.93	1.77e-43	1.26e-39	GNLY	granulysin	Multiple_Complex
TC1200011711.hg.1	9.51	10.81	-2.47	5.4e-09	1.49e-07	GNPTAB	N-acetylglucosamine-1-phosphate transferase, alpha and beta subunits	Multiple_Complex
TC1500008183.hg.1	9.72	10.99	-2.41	3.21e-05	0.0003	GOLGA6L3	golgin A6 family-like 3	Multiple_Complex
TC1500008988.hg.1	9.68	11.77	-4.24	3.75e-05	0.0004	GOLGA8A; GOLGA8B	golgin A8 family, member A; golgin A8 family, member B	Multiple_Complex
TC1500008995.hg.1	9.47	11.65	-4.52	1.03e-05	0.0001	GOLGA8B	golgin A8 family, member B	Multiple_Complex
TC2000008295.hg.1	7.73	8.96	-2.36	6.53e-05	0.0006	GPCPD1	glycerophosphocholine phosphodiesterase 1	Multiple_Complex
TC0200016548.hg.1	4.34	5.61	-2.42	0.0008	0.0047	GPD2	glycerol-3-phosphate dehydrogenase 2	Multiple_Complex
TC1900009445.hg.1	10.72	12.31	-3.02	8.9e-13	4.95e-11	GPR108; MIR6791	G protein-coupled receptor 108; microRNA 6791	Multiple_Complex
TC0100012089.hg.1	7.44	8.87	-2.69	2.07e-10	7.78e-09	GPR137B	G protein-coupled receptor 137B	Multiple_Complex
TC0700013354.hg.1	4.54	6.64	-4.3	7.42e-08	1.58e-06	GPR141	G protein-coupled receptor 141	Multiple_Complex
TC0300008114.hg.1	6.17	8.3	-4.39	1.28e-10	5.01e-09	GPR15	G protein-coupled receptor 15	Coding
TC0300012812.hg.1	8.3	10.32	-4.06	3.33e-16	3.19e-14	GPR171	G protein-coupled receptor 171	Coding
TC1300009597.hg.1	10.36	9.13	2.34	5.85e-07	1.01e-05	GPR18	G protein-coupled receptor 18	Coding
TC1300009598.hg.1	11.22	13	-3.45	1.08e-07	2.22e-06	GPR183	G protein-coupled receptor 183	Coding
TC1200009972.hg.1	4.97	6.05	-2.11	1.71e-05	0.0002	GPR19	G protein-coupled receptor 19	Multiple_Complex
TC0100010674.hg.1	5.82	8.59	-6.83	2.89e-14	2.07e-12	GPR52	G protein-coupled receptor 52	Coding
TC0400012947.hg.1	8.61	11.44	-7.13	5.66e-20	9.87e-18	GPRIN3	GPRIN family member 3	Coding
TC0300011059.hg.1	12.42	10.41	4.03	6.82e-17	7.14e-15	GPX1	glutathione peroxidase 1	Multiple_Complex
TC0500009109.hg.1	6.02	8.27	-4.77	6.19e-11	2.54e-09	GPX3	glutathione peroxidase 3	Multiple_Complex
TC1900006510.hg.1	12.01	10.43	2.99	2.53e-14	1.83e-12	GPX4	glutathione peroxidase 4	Multiple_Complex
TC1100013109.hg.1	5.29	7.97	-6.43	9.41e-15	7.39e-13	GRAMD1B	GRAM domain containing 1B	Multiple_Complex
TC1700009995.hg.1	7.68	5.48	4.61	1.72e-15	1.53e-13	GRAP	GRB2-related adaptor protein	Multiple_Complex
TC1700007153.hg.1	8.08	6.49	3.01	3.09e-12	1.54e-10	GRAPL	GRB2-related adaptor protein-like	Coding
TC0700013424.hg.1	8.28	7.16	2.17	7.04e-13	3.97e-11	GS1-259H13.2; TCONS_l2_00026125; TCONS_l2_00026126; ZNF655	transmembrane protein 225-like; Jeck2013 ALT_ACCEPTOR, ALT_DONOR, ncRNA, OVCODE, OVEXON, upstream_start best transcript TCONS_l2_00026125; Salzman2013 ANNOTATED, INTERNAL, ncRNA, OVCODE, OVEXON best transcript TCONS_l2_00026126; novel transcript; Transcript Identified by AceView, Entrez Gene ID(s) 79027	Multiple_Complex
TC0700009485.hg.1	10.38	11.5	-2.17	1.51e-07	2.99e-06	GSTK1	glutathione S-transferase kappa 1	Multiple_Complex
TC0100015211.hg.1	9.1	6.75	5.09	1.04e-05	0.0001	GSTM3	glutathione S-transferase mu 3 (brain)	Multiple_Complex
TC1000008800.hg.1	10.54	9.51	2.04	5.07e-05	0.0005	GSTO1	glutathione S-transferase omega 1	Multiple_Complex
TC0500007413.hg.1	6.53	13.4	-117.21	3.3e-42	1.77e-38	GZMA	granzyme A	Multiple_Complex
TC1400008764.hg.1	7.72	11.03	-9.92	3.52e-19	5.51e-17	GZMB	granzyme B	Coding
TC1400008763.hg.1	5.67	12.16	-89.91	1.51e-41	6.46e-38	GZMH	granzyme H	Coding
TC0500007408.hg.1	8.74	14.24	-45.2	1.69e-19	2.79e-17	GZMK	granzyme K	Multiple_Complex
TC1800008988.hg.1	8.12	4.49	12.45	4.51e-25	1.83e-22	GTSCR1	Gilles de la Tourette syndrome chromosome region, candidate 1 (non-protein coding)	Multiple_Complex
TC0200009189.hg.1	11.92	10.73	2.29	5.59e-12	2.67e-10	GYPC	glycophorin C (Gerbich blood group)	Multiple_Complex
TC0200014154.hg.1	11.13	8.93	4.6	6.06e-10	2.1e-08	GYPC	Memczak2013 ANTISENSE, coding, INTERNAL, UTR3 best transcript NM_016815	NonCoding
TC0900009685.hg.1	8.26	9.86	-3.02	6.42e-09	1.73e-07	HACD4	3-hydroxyacyl-CoA dehydratase 4	Multiple_Complex
TC1500010368.hg.1	9.54	8.09	2.73	3.01e-07	5.59e-06	HAPLN3	hyaluronan and proteoglycan link protein 3	Multiple_Complex
TC1100009917.hg.1	11.43	8.84	6.05	0.0061	0.0253	HBB	hemoglobin, beta	Multiple_Complex
TC0600008043.hg.1	5.12	6.72	-3.03	3.14e-09	9.11e-08	HCRP1	Transcript Identified by AceView, Entrez Gene ID(s) 387535	Unassigned
TC2200009360.hg.1	4.86	5.86	-2	8.06e-08	1.71e-06	HDAC10	histone deacetylase 10	Multiple_Complex
TC0200016252.hg.1	9.91	11.54	-3.08	1.75e-10	6.66e-09	HDAC4	histone deacetylase 4	Multiple_Complex
TC0X00007205.hg.1	7.72	8.74	-2.03	0.0001	0.001	HDAC6	histone deacetylase 6	Multiple_Complex
TC1700011305.hg.1	6.76	7.77	-2.02	3.05e-07	5.66e-06	HEATR6	HEAT repeat containing 6	Multiple_Complex
TC1700010445.hg.1	4.54	5.71	-2.24	9.26e-10	3.04e-08	HEATR9	HEAT repeat containing 9	Multiple_Complex
TC1200009981.hg.1	7.44	6.21	2.35	6.85e-10	2.33e-08	HEBP1	heme binding protein 1	Multiple_Complex
TC0100013998.hg.1	8.13	9.6	-2.76	3.45e-10	1.26e-08	HECTD3	HECT domain containing E3 ubiquitin protein ligase 3	Multiple_Complex
TC1200011968.hg.1	8.43	9.52	-2.13	3.21e-06	4.5e-05	HECTD4; MIR6861	HECT domain containing E3 ubiquitin protein ligase 4; microRNA 6861	Multiple_Complex
TC1700011519.hg.1	8.74	10.21	-2.78	1.97e-06	2.94e-05	HELZ	helicase with zinc finger	Multiple_Complex
TC1500008616.hg.1	7.15	8.39	-2.38	7.22e-05	0.0007	HERC2P3	hect domain and RLD 2 pseudogene 3	Multiple_Complex
TC0400011291.hg.1	8.76	9.96	-2.3	9.61e-10	3.14e-08	HERC6	Memczak2013 ANTISENSE, coding, INTERNAL, intronic best transcript NM_001165136	NonCoding
TC0700010728.hg.1	10.6	11.74	-2.2	1.83e-13	1.13e-11	HERPUD2	HERPUD family member 2	Multiple_Complex
TC1700009189.hg.1	7.68	9.26	-3	1.82e-07	3.54e-06	HGS	hepatocyte growth factor-regulated tyrosine kinase substrate	Multiple_Complex
TC0800007460.hg.1	10.81	11.93	-2.16	2.08e-06	3.07e-05	HGSNAT	heparan-alpha-glucosaminide N-acetyltransferase	Multiple_Complex
TC0100011472.hg.1	4.67	6.23	-2.95	1.68e-09	5.21e-08	HHAT	hedgehog acyltransferase	Multiple_Complex
TC0100008696.hg.1	7.42	6.41	2.01	2.87e-06	4.08e-05	HHLA3	HERV-H LTR-associating 3	Multiple_Complex
TC0700013458.hg.1	10.2	8.37	3.56	6.9e-10	2.34e-08	HILPDA	hypoxia inducible lipid droplet-associated	Multiple_Complex
TC0600007377.hg.1	9.87	11.59	-3.3	1.91e-05	0.0002	HIST1H2BM	histone cluster 1, H2bm	Coding
TC0600014074.hg.1	10.17	9.11	2.09	5.79e-06	7.61e-05	HIVEP1	human immunodeficiency virus type I enhancer binding protein 1	Multiple_Complex
TC0100013873.hg.1	5.4	6.43	-2.04	1.67e-05	0.0002	HIVEP3	human immunodeficiency virus type I enhancer binding protein 3	Multiple_Complex
TC1900011722.hg.1	8.55	9.66	-2.16	0.0003	0.0021	HKR1	HKR1, GLI-Kruppel zinc finger family member	Multiple_Complex
TC0600014277.hg.1	8.97	10.44	-2.77	6.87e-09	1.84e-07	HLA-DMA	major histocompatibility complex, class II, DM alpha	Multiple_Complex
TC0600014276.hg.1	8.08	9.33	-2.37	2.56e-08	6.14e-07	HLA-DMB	major histocompatibility complex, class II, DM beta	Multiple_Complex
TC0600011516.hg.1	5.72	4.05	3.19	1.42e-12	7.6e-11	HLA-DOA	major histocompatibility complex, class II, DO alpha	Multiple_Complex
TC0600011517.hg.1	9.87	12.38	-5.67	3.18e-22	8.12e-20	HLA-DPA1	major histocompatibility complex, class II, DP alpha 1	Multiple_Complex
TC0600007677.hg.1	12.58	14.02	-2.72	8.65e-07	1.43e-05	HLA-DPB1	major histocompatibility complex, class II, DP beta 1	Multiple_Complex
TC0600007657.hg.1	7.31	8.88	-2.95	0.0005	0.0032	HLA-DQA1	major histocompatibility complex, class II, DQ alpha 1	Multiple_Complex
TC0600007650.hg.1	7.11	8.28	-2.25	0.0018	0.0096	HLA-DRA	major histocompatibility complex, class II, DR alpha	Coding
TC0600014273.hg.1	6.19	8.69	-5.67	2.23e-10	8.3e-09	HLA-DRB1	major histocompatibility complex, class II, DR beta 1	Multiple_Complex
TC2100008087.hg.1	5.1	6.11	-2.02	2.1e-05	0.0002	HLCS	holocarboxylase synthetase (biotin-(proprionyl-CoA-carboxylase (ATP-hydrolysing)) ligase)	Multiple_Complex
TC0600007748.hg.1	10.94	9.78	2.25	3.15e-10	1.15e-08	HMGA1	high mobility group AT-hook 1	Multiple_Complex
TC1900006509.hg.1	8.07	6.74	2.51	1.88e-08	4.61e-07	HMHA1	histocompatibility (minor) HA-1	Multiple_Complex
TC1700012468.hg.1	9.51	10.64	-2.18	1.4e-09	4.44e-08	HN1	hematological and neurological expressed 1	Multiple_Complex
TC0200012288.hg.1	6.41	8.96	-5.87	1.39e-18	1.99e-16	HNRNPLL	heterogeneous nuclear ribonucleoprotein L-like	Multiple_Complex
TC0100008503.hg.1	9.76	8.54	2.33	3.02e-05	0.0003	HOOK1	hook microtubule-tethering protein 1	Multiple_Complex
TC1700012434.hg.1	4.35	5.37	-2.03	4.1e-05	0.0004	HOXB7	homeobox B7	Multiple_Complex
TC0200006687.hg.1	7.93	6.64	2.45	9.28e-13	5.13e-11	HPCAL1	hippocalcin-like 1	Multiple_Complex
TC0300009131.hg.1	10.15	11.22	-2.09	3.17e-07	5.88e-06	HPS3	Hermansky-Pudlak syndrome 3	Multiple_Complex
TC1800007829.hg.1	8.54	7.08	2.74	1.42e-07	2.83e-06	HSBP1L1	heat shock factor binding protein 1-like 1	Multiple_Complex
TC1100012992.hg.1	7.08	6.02	2.09	9.42e-05	0.0008	HSD17B12	hydroxysteroid (17-beta) dehydrogenase 12	Multiple_Complex
TC1900011099.hg.1	5.1	3.92	2.27	2.79e-11	1.23e-09	HSD17B14	hydroxysteroid (17-beta) dehydrogenase 14	Multiple_Complex
TC0600009322.hg.1	10.18	8.94	2.37	2.57e-08	6.16e-07	HSF2	heat shock transcription factor 2	Multiple_Complex
TC1600008146.hg.1	6.46	8.5	-4.09	3.58e-13	2.11e-11	HSF4; FBXL8	heat shock transcription factor 4; F-box and leucine-rich repeat protein 8	Multiple_Complex
TC0100013229.hg.1	6.07	4.11	3.9	1.39e-14	1.06e-12	HSPG2	heparan sulfate proteoglycan 2	Multiple_Complex
TC1500007977.hg.1	5.02	4	2.03	3.46e-07	6.35e-06	HYKK	hydroxylysine kinase	Multiple_Complex
TSUnmapped00000327.hg.1	7.8	9.63	-3.55	2.78e-08	6.63e-07	HYOU1	hypoxia up-regulated 1	Coding
TSUnmapped00000558.hg.1	9.66	11.3	-3.11	1.23e-08	3.15e-07	HYOU1	hypoxia up-regulated 1	NonCoding
TC1100012510.hg.1	12.37	13.92	-2.94	4.51e-09	1.26e-07	HYOU1	hypoxia up-regulated 1	Multiple_Complex
TSUnmapped00000310.hg.1	7.06	8.5	-2.72	2.47e-07	4.68e-06	HYOU1	hypoxia up-regulated 1	Coding
TSUnmapped00000244.hg.1	11.22	12.63	-2.66	2.48e-09	7.36e-08	HYOU1	hypoxia up-regulated 1	Coding
TSUnmapped00000484.hg.1	10.51	11.64	-2.19	2.34e-08	5.65e-07	HYOU1	hypoxia up-regulated 1	Coding
TC0200006627.hg.1	8.34	10.23	-3.71	2.85e-11	1.25e-09	ID2	inhibitor of DNA binding 2, dominant negative helix-loop-helix protein	Multiple_Complex
TC0100013293.hg.1	9.42	5.9	11.48	1.86e-18	2.51e-16	ID3	inhibitor of DNA binding 3, dominant negative helix-loop-helix protein	Multiple_Complex
TC0X00011404.hg.1	11.48	12.58	-2.15	9.51e-12	4.45e-10	IDS	iduronate 2-sulfatase	Multiple_Complex
TC1000008396.hg.1	8.47	7.36	2.16	0.0049	0.0212	IFIT2	interferon-induced protein with tetratricopeptide repeats 2	Coding
TC1200011177.hg.1	5.31	8.12	-7.04	6.48e-07	1.11e-05	IFNG	interferon, gamma	Multiple_Complex
TC0600013300.hg.1	7.77	8.85	-2.12	5.89e-06	7.69e-05	IFNGR1	interferon gamma receptor 1	Multiple_Complex
TC2100006968.hg.1	7.71	6.6	2.16	0.0002	0.0014	IFNGR2	Memczak2013 ALT_ACCEPTOR, ALT_DONOR, coding, INTERNAL, intronic best transcript NM_005534	NonCoding
TC2100006967.hg.1	10.07	7	8.41	5.99e-22	1.41e-19	IFNGR2	interferon gamma receptor 2 (interferon gamma transducer 1)	Multiple_Complex
TC1500008485.hg.1	11.81	7.11	25.87	1.69e-33	2.13e-30	IGF1R	insulin-like growth factor 1 receptor	Multiple_Complex
TC0600010066.hg.1	7.91	9.41	-2.83	5.62e-08	1.24e-06	IGF2R	insulin-like growth factor 2 receptor	Multiple_Complex
TC0200010745.hg.1	7.14	5.49	3.13	3.22e-14	2.28e-12	IGFBP2	insulin like growth factor binding protein 2	Multiple_Complex
TC1100012906.hg.1	7.43	9.25	-3.52	1.91e-06	2.85e-05	IGSF9B	immunoglobulin superfamily, member 9B	Multiple_Complex
TC0X00008844.hg.1	5.4	6.57	-2.25	0.0007	0.0045	IKBKG	inhibitor of kappa light polypeptide gene enhancer in B-cells, kinase gamma	Multiple_Complex
TC1100009191.hg.1	10.18	12.21	-4.08	4.99e-13	2.88e-11	IL10RA	interleukin 10 receptor, alpha	Multiple_Complex
TC0100008653.hg.1	5.96	8.45	-5.61	1.57e-10	6.03e-09	IL12RB2	interleukin 12 receptor, beta 2	Multiple_Complex
TC0400008861.hg.1	5.99	7.84	-3.58	8.81e-09	2.31e-07	IL15	interleukin 15	Multiple_Complex
TC1000012519.hg.1	8.12	9.18	-2.08	9.79e-08	2.03e-06	IL15RA	interleukin 15 receptor, alpha	Multiple_Complex
TC0200016502.hg.1	6.5	9.05	-5.88	1.6e-14	1.19e-12	IL18R1	interleukin 18 receptor 1	Multiple_Complex
TC0200008675.hg.1	4.13	10.05	-60.66	5.33e-22	1.28e-19	IL18RAP	interleukin 18 receptor accessory protein	Multiple_Complex
TC0200013916.hg.1	12.67	10.88	3.47	0.0099	0.0371	IL1B	interleukin 1 beta	Multiple_Complex
TC0100008648.hg.1	4.18	5.58	-2.64	0.0003	0.002	IL23R	interleukin 23 receptor	Multiple_Complex
TC0100011391.hg.1	8.3	7.14	2.23	8.06e-11	3.26e-09	IL24	interleukin 24	Multiple_Complex
TC1200011178.hg.1	4	5.85	-3.61	3.91e-09	1.11e-07	IL26	interleukin 26	Coding
TC1000009691.hg.1	6.73	10.01	-9.65	6.69e-13	3.81e-11	IL2RA	interleukin 2 receptor, alpha	Coding
TC2200008637.hg.1	9.96	11.37	-2.66	5.54e-14	3.73e-12	IL2RB	interleukin 2 receptor, beta	Multiple_Complex
TC0100010078.hg.1	7.32	5.78	2.92	1.57e-08	3.9e-07	IL6R	interleukin 6 receptor	Multiple_Complex
TC0500010788.hg.1	11.66	9.54	4.34	5.01e-10	1.76e-08	IL6ST	interleukin 6 signal transducer	Multiple_Complex
TC0500007138.hg.1	14.15	15.16	-2.01	0.0003	0.0023	IL7R	interleukin 7 receptor	Multiple_Complex
TC0X00011336.hg.1	4.94	7.22	-4.86	5.97e-16	5.61e-14	IL9R	interleukin 9 receptor	Multiple_Complex
TC0Y00007332.hg.1	4.94	7.22	-4.86	5.97e-16	5.61e-14	IL9R	Homo sapiens interleukin 9 receptor (IL9R), transcript variant 1, mRNA.; Homo sapiens interleukin 9 receptor (IL9R), transcript variant 2, mRNA.; interleukin 9 receptor [Source:HGNC Symbol;Acc:HGNC:6030]; Homo sapiens interleukin 9 receptor, mRNA (cDNA clone MGC:59852 IMAGE:6304829), complete cds.; Transcript Identified by AceView, Entrez Gene ID(s) 3581, RefSeq ID(s) NM_002186; Transcript Identi…	Multiple_Complex
TC0300011047.hg.1	14.33	12.98	2.54	5.69e-18	7.14e-16	IMPDH2	IMP (inosine 5-monophosphate) dehydrogenase 2	Multiple_Complex
TC1000009414.hg.1	6.48	5.28	2.29	4.43e-07	7.9e-06	INPP5A	inositol polyphosphate-5-phosphatase A	Multiple_Complex
TSUnmapped00000290.hg.1	6.46	8.39	-3.82	4.5e-08	1.03e-06	INPP5D	inositol polyphosphate-5-phosphatase D	NonCoding
TSUnmapped00000401.hg.1	8.33	10.15	-3.54	1.11e-06	1.79e-05	INPP5D	inositol polyphosphate-5-phosphatase D	NonCoding
TSUnmapped00000135.hg.1	11.67	13	-2.53	1.42e-07	2.82e-06	INPP5D	inositol polyphosphate-5-phosphatase D	Coding
TSUnmapped00000580.hg.1	5.67	6.98	-2.48	3.88e-08	9.04e-07	INPP5D	inositol polyphosphate-5-phosphatase D	NonCoding
TSUnmapped00000661.hg.1	10.18	11.39	-2.32	2.16e-06	3.18e-05	INPP5D	inositol polyphosphate-5-phosphatase D	Coding
TSUnmapped00000446.hg.1	8.04	9.21	-2.25	2.59e-05	0.0003	INPP5D	inositol polyphosphate-5-phosphatase D	Coding
TC0200011121.hg.1	11.07	12.15	-2.12	1.44e-07	2.87e-06	INPP5D	inositol polyphosphate-5-phosphatase D	Multiple_Complex
TC0700007811.hg.1	10.06	11.07	-2.01	9.47e-05	0.0008	INTS4P2	integrator complex subunit 4 pseudogene 2	Multiple_Complex
TC0100017229.hg.1	5.24	6.35	-2.17	3.58e-06	4.94e-05	INTS7	integrator complex subunit 7	Multiple_Complex
TC0200016166.hg.1	5.16	3.83	2.53	5.69e-10	1.98e-08	IQCA1	IQ motif containing with AAA domain 1	Multiple_Complex
TC1500008312.hg.1	10.63	12	-2.59	8.62e-15	6.85e-13	IQGAP1	IQ motif containing GTPase activating protein 1	Multiple_Complex
TC0500007826.hg.1	7.38	9.61	-4.67	2.01e-16	1.98e-14	IQGAP2	IQ motif containing GTPase activating protein 2	Multiple_Complex
TC0300010315.hg.1	5.11	6.16	-2.07	2.65e-08	6.34e-07	IQSEC1	IQ motif and Sec7 domain 1	Multiple_Complex
TC0200015912.hg.1	6.64	5.17	2.79	9.98e-15	7.82e-13	IRS1	insulin receptor substrate 1	Multiple_Complex
TC1900010016.hg.1	9.68	8.35	2.52	4.97e-08	1.12e-06	ISYNA1	inositol-3-phosphate synthase 1	Multiple_Complex
TC0200010157.hg.1	8.09	10.2	-4.3	2.17e-10	8.12e-09	ITGA4	integrin alpha 4	Multiple_Complex
TC1200010839.hg.1	8.18	9.76	-2.98	4.08e-11	1.75e-09	ITGA5	integrin alpha 5	Multiple_Complex
TC1600007470.hg.1	5.91	8.13	-4.66	4.14e-11	1.77e-09	ITGAL	integrin alpha L	Multiple_Complex
TC1000010265.hg.1	11.17	14.89	-13.16	4.05e-21	8.35e-19	ITGB1	integrin beta 1	Multiple_Complex
TC2100008392.hg.1	7.52	9.05	-2.88	7.11e-09	1.9e-07	ITGB2	integrin, beta 2 (complement component 3 receptor 3 and 4 subunit)	Multiple_Complex
TC0300013994.hg.1	7.57	9.21	-3.12	7.21e-10	2.44e-08	ITIH4	inter-alpha-trypsin inhibitor heavy chain family, member 4	Multiple_Complex
TC0600007711.hg.1	7.38	8.7	-2.5	4.61e-08	1.05e-06	ITPR3	inositol 1,4,5-trisphosphate receptor, type 3	Multiple_Complex
TC0200008501.hg.1	5.18	8.88	-13.08	3.17e-26	1.48e-23	ITPRIPL1	inositol 1,4,5-trisphosphate receptor interacting protein-like 1	Coding
TC0400009897.hg.1	4.68	8.07	-10.44	9.74e-23	2.68e-20	JAKMIP1	janus kinase and microtubule interacting protein 1	Multiple_Complex
TC0500012390.hg.1	4.35	7.01	-6.31	7.93e-15	6.4e-13	JAKMIP2	janus kinase and microtubule interacting protein 2	Multiple_Complex
TC1100009611.hg.1	7.27	6.19	2.1	3.9e-08	9.06e-07	JAM3	junctional adhesion molecule 3	Multiple_Complex
TC0700007031.hg.1	5.19	6.61	-2.68	2.04e-06	3.01e-05	JAZF1	Memczak2013 ANTISENSE, coding, INTERNAL, intronic best transcript NM_175061	NonCoding
TC0300006791.hg.1	9.94	11.57	-3.09	1.88e-17	2.17e-15	KAT2B	K(lysine) acetyltransferase 2B	Multiple_Complex
TC0300006793.hg.1	5.8	6.94	-2.19	4.23e-06	5.74e-05	KAT2B	Transcript Identified by AceView, Entrez Gene ID(s) 8850	Unassigned
TC1300008511.hg.1	4.21	5.78	-2.98	6.35e-08	1.38e-06	KATNAL1	katanin p60 subunit A-like 1	Multiple_Complex
TC0100015246.hg.1	10.57	11.59	-2.03	3.73e-07	6.77e-06	KCNA3	potassium channel, voltage gated shaker related subfamily A, member 3	Multiple_Complex
TC1100012786.hg.1	4.33	5.37	-2.05	1.14e-06	1.83e-05	KCNJ1	potassium channel, inwardly rectifying subfamily J, member 1	Multiple_Complex
TC1200008165.hg.1	5.79	4.62	2.25	5.89e-12	2.8e-10	KCNMB4	potassium channel subfamily M regulatory beta subunit 4	Multiple_Complex
TC1100006580.hg.1	6.74	5.47	2.41	8.89e-15	7.03e-13	KCNQ1	potassium channel, voltage gated KQT-like subfamily Q, member 1	Multiple_Complex
TC0600008509.hg.1	6.48	5.18	2.46	9.86e-09	2.57e-07	KCNQ5	potassium channel, voltage gated KQT-like subfamily Q, member 5	Multiple_Complex
TC1200011870.hg.1	7.54	8.62	-2.12	1.6e-06	2.44e-05	KCTD10	potassium channel tetramerization domain containing 10	Multiple_Complex
TC1600009944.hg.1	9.51	11.23	-3.31	1.28e-06	2.02e-05	KCTD13	potassium channel tetramerization domain containing 13	Multiple_Complex
TC1100011742.hg.1	7.11	8.29	-2.27	2.52e-05	0.0003	KCTD21	potassium channel tetramerization domain containing 21	Coding
TC1200012206.hg.1	10.55	11.83	-2.42	5.66e-05	0.0005	KDM2B	lysine (K)-specific demethylase 2B	Multiple_Complex
TC1200009550.hg.1	6.75	8.05	-2.45	9.85e-07	1.6e-05	KDM5A	lysine (K)-specific demethylase 5A	Multiple_Complex
TC0100013692.hg.1	9.97	11.36	-2.61	2.28e-08	5.53e-07	KIAA0319L	KIAA0319-like	Multiple_Complex
TC0500011478.hg.1	4.8	6.16	-2.57	1.06e-09	3.4e-08	KIAA0825	KIAA0825	Multiple_Complex
TC0400008609.hg.1	7.83	9.07	-2.38	1.67e-07	3.27e-06	KIAA1109	KIAA1109	Multiple_Complex
TC1900010008.hg.1	6.89	8.36	-2.77	4.06e-05	0.0004	KIAA1683	KIAA1683	Multiple_Complex
TC0200016454.hg.1	4.79	6.18	-2.62	2.73e-09	8.06e-08	KIAA1841	KIAA1841	Multiple_Complex
TC0900012201.hg.1	5.18	6.62	-2.71	1.16e-08	2.99e-07	KIAA2026	KIAA2026	NonCoding
TC0900012202.hg.1	10.04	11.2	-2.24	2.22e-09	6.71e-08	KIAA2026	KIAA2026	Multiple_Complex
TC0200016624.hg.1	8.06	9.07	-2.01	9.41e-06	0.0001	KIDINS220	kinase D-interacting substrate 220kDa	Multiple_Complex
TC0100006812.hg.1	4.27	6.29	-4.05	2.75e-08	6.56e-07	KIF1B	kinesin family member 1B	Multiple_Complex
TC1200010407.hg.1	5.54	7.89	-5.08	8.1e-17	8.39e-15	KIF21A	kinesin family member 21A	Multiple_Complex
TC0100016899.hg.1	6.88	7.95	-2.1	5.34e-06	7.05e-05	KIF21B	kinesin family member 21B	Multiple_Complex
TC1600007425.hg.1	6.94	7.94	-2.01	3.62e-06	5e-05	KIF22	kinesin family member 22	Multiple_Complex
TC0200006674.hg.1	5.18	6.4	-2.33	1.66e-05	0.0002	KLF11	Kruppel-like factor 11	Multiple_Complex
TC1000009612.hg.1	12.97	15.03	-4.18	4.42e-15	3.71e-13	KLF6	Kruppel-like factor 6	Multiple_Complex
TC0200015538.hg.1	12.65	11.27	2.61	3.57e-06	4.94e-05	KLF7	Kruppel-like factor 7 (ubiquitous)	Multiple_Complex
TC1200009910.hg.1	4.25	5.96	-3.28	6.5e-07	1.11e-05	KLRAP1	killer cell lectin-like receptor subfamily A pseudogene 1	Multiple_Complex
TC1200009872.hg.1	5.28	10.83	-46.82	9.35e-26	4.18e-23	KLRB1	killer cell lectin-like receptor subfamily B, member 1	Coding
TC1200012754.hg.1	4.53	5.6	-2.09	0.0018	0.0096	KLRC1	killer cell lectin-like receptor subfamily C, member 1	Multiple_Complex
TC1200012753.hg.1	7.1	9.17	-4.19	3.09e-06	4.36e-05	KLRC2	killer cell lectin-like receptor subfamily C, member 2	Coding
TC1200006788.hg.1	6.12	11.84	-52.78	9.03e-33	9.22e-30	KLRD1	killer cell lectin-like receptor subfamily D, member 1	Multiple_Complex
TC1200006773.hg.1	5.7	7.45	-3.38	2.97e-11	1.29e-09	KLRF1	killer cell lectin-like receptor subfamily F, member 1	Multiple_Complex
TC1200006738.hg.1	6.51	12.01	-45.4	2.1e-28	1.34e-25	KLRG1	killer cell lectin-like receptor subfamily G, member 1	Multiple_Complex
TC0700013102.hg.1	10.36	11.42	-2.09	0.0012	0.0069	KMT2C	lysine (K)-specific methyltransferase 2C	Multiple_Complex
TC1200010764.hg.1	5.45	3.98	2.77	2.21e-09	6.69e-08	KRT73	keratin 73, type II	Multiple_Complex
TC1100009746.hg.1	6.34	7.75	-2.66	9.78e-12	4.55e-10	KRTAP5-2	keratin associated protein 5-2	Coding
TC1100013127.hg.1	5.96	6.98	-2.03	2.72e-07	5.1e-06	KRTAP5-4	keratin associated protein 5-4	Coding
TC1700012215.hg.1	8.58	9.99	-2.65	5.05e-08	1.13e-06	KSR1	kinase suppressor of ras 1	Multiple_Complex
TC0300013336.hg.1	8.56	7.14	2.69	0.0025	0.0127	LAMP3	lysosomal-associated membrane protein 3	Multiple_Complex
TC0800008321.hg.1	4.55	3.5	2.08	8.74e-08	1.83e-06	LAPTM4B	lysosomal protein transmembrane 4 beta	Multiple_Complex
TC1700007725.hg.1	11.82	12.89	-2.1	4.08e-07	7.36e-06	LASP1	LIM and SH3 protein 1	Multiple_Complex
TC0100011270.hg.1	6.86	8.81	-3.87	1.46e-09	4.59e-08	LAX1	lymphocyte transmembrane adaptor 1	Multiple_Complex
TC1100009024.hg.1	7.19	3.91	9.72	4.4e-23	1.31e-20	LAYN	layilin	Multiple_Complex
TC0400010168.hg.1	9.61	10.91	-2.47	1.02e-08	2.65e-07	LCORL	ligand dependent nuclear receptor corepressor like	Multiple_Complex
TC1300008840.hg.1	15.15	16.23	-2.1	4.6e-13	2.67e-11	LCP1	lymphocyte cytosolic protein 1 (L-plastin)	Multiple_Complex
TC1200010109.hg.1	13.06	11.22	3.58	3.11e-23	9.4e-21	LDHB	lactate dehydrogenase B	Multiple_Complex
TC1800006757.hg.1	11.98	10.72	2.4	0.0006	0.004	LDLRAD4	low density lipoprotein receptor class A domain containing 4	Multiple_Complex
TC0100007406.hg.1	12.92	9.93	7.93	1.32e-23	4.34e-21	LDLRAP1	low density lipoprotein receptor adaptor protein 1	Multiple_Complex
TC0X00010989.hg.1	7.35	6.14	2.32	2.25e-05	0.0002	LDOC1	leucine zipper, down-regulated in cancer 1	Multiple_Complex
TC0400011548.hg.1	15.22	12.31	7.53	4.29e-22	1.06e-19	LEF1	lymphoid enhancer-binding factor 1	Multiple_Complex
TC1900008860.hg.1	14.1	15.37	-2.4	4.04e-06	5.52e-05	LENG8	leukocyte receptor cluster (LRC) member 8	Multiple_Complex
TC2200007312.hg.1	11.55	13.91	-5.14	1.51e-14	1.13e-12	LGALS1	lectin, galactoside-binding, soluble, 1	Multiple_Complex
TC1400007227.hg.1	6.45	7.95	-2.83	7.69e-10	2.59e-08	LGALS3	lectin, galactoside-binding, soluble, 3	Multiple_Complex
TC1400010012.hg.1	8.39	6.43	3.88	3.03e-14	2.16e-12	LGMN	legumain	Multiple_Complex
TC0100011215.hg.1	4.64	5.81	-2.25	4.81e-07	8.52e-06	LGR6	leucine-rich repeat containing G protein-coupled receptor 6	Multiple_Complex
TC1900011799.hg.1	6.14	7.93	-3.46	4.19e-08	9.62e-07	LILRB1	leukocyte immunoglobulin-like receptor, subfamily B (with TM and ITIM domains), member 1	Multiple_Complex
TC1900012039.hg.1	6.59	5.58	2.02	6.99e-06	8.9e-05	LILRB2	leukocyte immunoglobulin-like receptor, subfamily B (with TM and ITIM domains), member 2	Multiple_Complex
TC0300007237.hg.1	6.88	7.98	-2.15	5.02e-05	0.0005	LIMD1	LIM domains containing 1	Multiple_Complex
TC0700011508.hg.1	9.16	10.16	-2	0.002	0.0106	LIMK1	Memczak2013 ANTISENSE, CDS, coding, INTERNAL best transcript NM_001204426	NonCoding
TC0200008806.hg.1	6.75	7.83	-2.12	1e-07	2.07e-06	LIMS1	LIM and senescent cell antigen-like domains 1	Multiple_Complex
TC0100011269.hg.1	6.72	9.61	-7.4	1.82e-13	1.13e-11	LINC00260	long intergenic non-protein coding RNA 260	Multiple_Complex
TC1300008998.hg.1	5.6	4.07	2.89	2.31e-12	1.19e-10	LINC00282	long intergenic non-protein coding RNA 282	NonCoding
TC2000009895.hg.1	12.84	11.4	2.71	1.14e-11	5.23e-10	LINC00493	long intergenic non-protein coding RNA 493	Multiple_Complex
TC1200009846.hg.1	6.82	11.84	-32.56	1.9e-21	4.12e-19	LINC00612	long intergenic non-protein coding RNA 612	Multiple_Complex
TC0500012965.hg.1	12.02	13.03	-2.02	1.42e-10	5.5e-09	LMAN2	lectin, mannose-binding 2	Multiple_Complex
TC2200009161.hg.1	6.52	7.53	-2.02	3.54e-05	0.0004	LMF2	lipase maturation factor 2	Multiple_Complex
TC0100010152.hg.1	5.16	6.59	-2.69	7.93e-06	9.98e-05	LMNA	lamin A/C	Multiple_Complex
TC1300009980.hg.1	8.39	6.43	3.88	1.97e-08	4.81e-07	LMO7	LIM domain 7	Multiple_Complex
TC1100012443.hg.1	6.64	7.66	-2.02	4.43e-06	5.99e-05	LOC100652768; PCSK7	uncharacterized LOC100652768; Salzman2013 ANNOTATED, ncRNA, OVCODE, OVERLAPTX, OVEXON best transcript NR_045215; Transcript Identified by AceView, Entrez Gene ID(s) 9159	Multiple_Complex
TC2200009352.hg.1	6.79	8.44	-3.14	3.13e-05	0.0003	LOC400927; CSNK1E	TPTE and PTEN homologous inositol lipid phosphatase pseudogene; Transcript Identified by AceView, Entrez Gene ID(s) 1454; 400927	Multiple_Complex
TC0100009112.hg.1	6.92	5.19	3.33	6.51e-17	6.88e-15	LOC729970; RP4-639F20.1	hCG2028352-like; novel transcript	NonCoding
TC0600013780.hg.1	6.32	7.75	-2.71	5.59e-09	1.53e-07	LPAL2	lipoprotein, Lp(a)-like 2, pseudogene	Multiple_Complex
TC1300008892.hg.1	9.87	13.2	-10.06	6.92e-21	1.36e-18	LPAR6	lysophosphatidic acid receptor 6	Multiple_Complex
TC0500009863.hg.1	4.13	5.78	-3.14	1.66e-08	4.11e-07	LPCAT1	lysophosphatidylcholine acyltransferase 1	Multiple_Complex
TC1500008986.hg.1	7.87	9.39	-2.86	1.5e-07	2.97e-06	LPCAT4	lysophosphatidylcholine acyltransferase 4	Multiple_Complex
TC0100017223.hg.1	5.44	6.62	-2.26	3.67e-10	1.33e-08	LPGAT1	lysophosphatidylglycerol acyltransferase 1	Multiple_Complex
TC0300009815.hg.1	7.89	9.33	-2.72	3.58e-10	1.31e-08	LPP	LIM domain containing preferred translocation partner in lipoma	Multiple_Complex
TC0300011423.hg.1	6.48	8.3	-3.53	5.84e-08	1.29e-06	LRIG1	leucine-rich repeats and immunoglobulin-like domains 1	Multiple_Complex
TSUnmapped00000527.hg.1	8.74	10.53	-3.47	2.94e-10	1.08e-08	LRIG1		Coding
TSUnmapped00000585.hg.1	7.49	9.09	-3.04	2.08e-09	6.36e-08	LRIG1		NonCoding
TSUnmapped00000620.hg.1	4.61	5.62	-2.01	2.41e-05	0.0003	LRIG1		NonCoding
TSUnmapped00000012.hg.1	4.6	3.53	2.1	1.89e-07	3.68e-06	LRP6	LDL receptor related protein 6	Coding
TC1200009959.hg.1	5.73	4.55	2.27	8.9e-11	3.57e-09	LRP6	LDL receptor related protein 6	Multiple_Complex
TSUnmapped00000106.hg.1	5.87	4.62	2.38	9.5e-11	3.79e-09	LRP6	LDL receptor related protein 6	NonCoding
TSUnmapped00000267.hg.1	5.8	3.97	3.56	1.35e-13	8.62e-12	LRP6	LDL receptor related protein 6	Coding
TSUnmapped00000154.hg.1	7.05	4.62	5.4	2.98e-18	3.81e-16	LRP6	LDL receptor related protein 6	Coding
TC0100014228.hg.1	6.78	8.64	-3.62	2.17e-11	9.68e-10	LRP8	LDL receptor related protein 8	Multiple_Complex
TC1700008095.hg.1	12.59	13.62	-2.03	0.0002	0.0016	LRRC37A	leucine rich repeat containing 37A	Multiple_Complex
TC0100018247.hg.1	10.87	9.56	2.47	9.33e-07	1.53e-05	LRRC8D	leucine rich repeat containing 8 family, member D	Multiple_Complex
TC0300006465.hg.1	5.53	4.5	2.04	9.82e-07	1.6e-05	LRRN1	leucine rich repeat neuronal 1	Multiple_Complex
TC0700008809.hg.1	12.26	7.45	28.07	4.79e-25	1.9e-22	LRRN3	leucine rich repeat neuronal 3	Multiple_Complex
TC0900008805.hg.1	5.68	7.26	-2.98	7.37e-07	1.25e-05	LRSAM1	leucine rich repeat and sterile alpha motif containing 1	Multiple_Complex
TC0700010678.hg.1	10.44	9.02	2.68	8.58e-08	1.8e-06	LSM5	LSM5 homolog, U6 small nuclear RNA and mRNA degradation associated	Multiple_Complex
TC1900007844.hg.1	7.69	6.64	2.06	1.84e-08	4.53e-07	LSR	lipolysis stimulated lipoprotein receptor	Multiple_Complex
TC1200011599.hg.1	11.73	10.68	2.07	1.34e-09	4.26e-08	LTA4H	leukotriene A4 hydrolase	Multiple_Complex
TC0600011438.hg.1	15.26	12.86	5.27	1.22e-09	3.89e-08	LTB	lymphotoxin beta (TNF superfamily, member 3)	Multiple_Complex
TC0600011445.hg.1	4.87	5.89	-2.02	0.0004	0.0028	LY6G5C	lymphocyte antigen 6 complex, locus G5C	Multiple_Complex
TC0800007978.hg.1	7.59	6.12	2.77	1.2e-06	1.91e-05	LY96	lymphocyte antigen 96	Coding
TC0400009856.hg.1	10.75	12.01	-2.39	2.89e-08	6.86e-07	LYAR	Ly1 antibody reactive	Multiple_Complex
TC1900010847.hg.1	5.53	4.47	2.09	8.42e-10	2.8e-08	LYPD3	LY6/PLAUR domain containing 3	Multiple_Complex
TC1200007105.hg.1	8.9	7.28	3.06	1.13e-09	3.61e-08	LYRM5	LYR motif containing 5	Multiple_Complex
TC1500009438.hg.1	7.74	6.68	2.09	9.03e-07	1.49e-05	LYSMD2	LysM, putative peptidoglycan-binding, domain containing 2	Coding
TC0100017836.hg.1	12.05	14.84	-6.89	1.96e-17	2.24e-15	LYST	lysosomal trafficking regulator	Multiple_Complex
TC0100007898.hg.1	13.28	14.76	-2.8	2.52e-06	3.64e-05	MACF1; KIAA0754	microtubule-actin crosslinking factor 1; KIAA0754	Multiple_Complex
TC1600010951.hg.1	5.26	9.77	-22.79	1.91e-37	4.55e-34	MAF	v-maf avian musculoaponeurotic fibrosarcoma oncogene homolog	Coding
TC0300013400.hg.1	8.47	7.03	2.71	1.32e-15	1.2e-13	MAGEF1	MAGE family member F1	Coding
TC0200008452.hg.1	12.54	9.56	7.9	1.32e-17	1.56e-15	MAL	mal, T-cell differentiation protein	Multiple_Complex
TC0700006915.hg.1	10.63	9.51	2.18	2.49e-08	6e-07	MALSU1	mitochondrial assembly of ribosomal large subunit 1	Multiple_Complex
TC0500013277.hg.1	9.69	10.8	-2.16	0.0002	0.0016	MAML1	mastermind-like transcriptional coactivator 1	Multiple_Complex
TC1100012037.hg.1	10.36	9.35	2	8.31e-08	1.76e-06	MAML2	mastermind-like transcriptional coactivator 2	Multiple_Complex
TC0X00008712.hg.1	3.85	5.27	-2.68	1.03e-08	2.67e-07	MAMLD1	mastermind-like domain containing 1	Multiple_Complex
TC0100007412.hg.1	11.42	9.65	3.41	2.3e-10	8.55e-09	MAN1C1	mannosidase, alpha, class 1C, member 1	Multiple_Complex
TC0400006689.hg.1	8.49	9.73	-2.35	4.74e-07	8.43e-06	MAN2B2	mannosidase, alpha, class 2B, member 2	Multiple_Complex
TC0600013280.hg.1	7.03	9.09	-4.17	8.81e-17	9.08e-15	MAP3K5	mitogen-activated protein kinase kinase kinase 5	Multiple_Complex
TC1000007176.hg.1	7.15	10.61	-11.02	2.97e-20	5.48e-18	MAP3K8	mitogen-activated protein kinase kinase kinase 8	Multiple_Complex
TC0300010999.hg.1	9.31	10.63	-2.49	1.71e-09	5.32e-08	MAP4	microtubule associated protein 4	Multiple_Complex
TC1900010612.hg.1	10.57	12.05	-2.79	6.35e-10	2.19e-08	MAP4K1	mitogen-activated protein kinase kinase kinase kinase 1	Multiple_Complex
TC1400009131.hg.1	8.99	10.42	-2.69	2.17e-13	1.33e-11	MAP4K5	mitogen-activated protein kinase kinase kinase kinase 5	Multiple_Complex
TC0100011384.hg.1	9.94	11.03	-2.13	8.27e-07	1.38e-05	MAPKAPK2	mitogen-activated protein kinase-activated protein kinase 2	Multiple_Complex
TC0500011935.hg.1	6.37	5.11	2.4	1.39e-06	2.16e-05	MARCH3	membrane associated ring finger 3	Multiple_Complex
TC1400008397.hg.1	9.02	10.03	-2.03	0.0028	0.0136	MARK3	MAP/microtubule affinity-regulating kinase 3	Multiple_Complex
TC1200012650.hg.1	7.74	8.9	-2.22	5.03e-05	0.0005	MARS; MIR6758	methionyl-tRNA synthetase; microRNA 6758	Multiple_Complex
TC0600012293.hg.1	6.89	8.17	-2.43	7.43e-09	1.98e-07	MB21D1	Mab-21 domain containing 1	Multiple_Complex
TC0600010991.hg.1	5.66	7.18	-2.88	5.43e-09	1.49e-07	MBOAT1	membrane bound O-acyltransferase domain containing 1	Multiple_Complex
TC1800009112.hg.1	8.08	10.53	-5.48	3.29e-21	6.91e-19	MBP	myelin basic protein	Multiple_Complex
TC0100014768.hg.1	4.64	7.9	-9.6	2.5e-15	2.18e-13	MCOLN2	mucolipin 2	Multiple_Complex
TC0100014769.hg.1	4.61	6.5	-3.7	8.72e-08	1.83e-06	MCOLN3	mucolipin 3	Multiple_Complex
TC1500010792.hg.1	5.29	7.2	-3.76	1.32e-13	8.47e-12	MCTP2	multiple C2 domains, transmembrane 2	Multiple_Complex
TC2200009194.hg.1	11.74	12.74	-2	1.28e-05	0.0002	MED15	mediator complex subunit 15	Multiple_Complex
TC0400006990.hg.1	10.95	9.79	2.24	4.2e-07	7.53e-06	MED28	mediator complex subunit 28	Multiple_Complex
TC1700009293.hg.1	8.42	11.94	-11.45	6.93e-18	8.59e-16	METRNL	meteorin, glial cell differentiation regulator-like	Multiple_Complex
TC1200008318.hg.1	9.86	8.81	2.07	1.76e-05	0.0002	METTL25	methyltransferase like 25	Multiple_Complex
TC1400008636.hg.1	7.96	8.99	-2.03	1.46e-06	2.25e-05	METTL3	methyltransferase like 3	Multiple_Complex
TC0200014899.hg.1	7.04	8.34	-2.46	2.55e-07	4.82e-06	METTL8	methyltransferase like 8	Multiple_Complex
TC0400009790.hg.1	10.34	12.59	-4.75	8.88e-21	1.72e-18	MFSD10	major facilitator superfamily domain containing 10	Multiple_Complex
TC0400011815.hg.1	9.46	10.47	-2	0.0028	0.0137	MFSD8	major facilitator superfamily domain containing 8	Multiple_Complex
TC1000011660.hg.1	8.99	10.39	-2.65	0.0008	0.0048	MGEA5	Salzman2013 ALT_ACCEPTOR, ALT_DONOR, coding, INTERNAL, intronic best transcript NM_012215	NonCoding
TC0600009095.hg.1	9.57	11.13	-2.95	0.0001	0.0012	MICAL1	Jeck2013 ANTISENSE, coding, INTERNAL, intronic best transcript NM_022765	NonCoding
TC1100012966.hg.1	6.52	8.38	-3.64	9.99e-13	5.45e-11	MICAL2	microtubule associated monooxygenase, calponin and LIM domain containing 2	Multiple_Complex
TC0800006860.hg.1	5.85	4.13	3.3	1.06e-11	4.93e-10	MICU3	mitochondrial calcium uptake family, member 3	Multiple_Complex
TC1900006522.hg.1	9.25	10.47	-2.33	5.39e-09	1.49e-07	MIDN	midnolin	Multiple_Complex
TC1700006646.hg.1	8.83	10.39	-2.94	2.49e-08	5.99e-07	MINK1	misshapen-like kinase 1	Multiple_Complex
TC0900006569.hg.1	6.36	7.85	-2.81	2.26e-06	3.31e-05	MLANA	melan-A	Multiple_Complex
TC0600010235.hg.1	4.9	6.34	-2.71	2.2e-09	6.69e-08	MLLT4	myeloid/lymphoid or mixed-lineage leukemia; translocated to, 4	Multiple_Complex
TC1200009196.hg.1	8.09	6.97	2.18	4.8e-08	1.08e-06	MLXIP	MLX interacting protein	Multiple_Complex
TSUnmapped00000502.hg.1	10.76	9.48	2.43	2.83e-16	2.74e-14	MLXIP	MLX interacting protein	NonCoding
TSUnmapped00000103.hg.1	11.93	10.55	2.6	1.52e-15	1.36e-13	MLXIP	MLX interacting protein	NonCoding
TC1600009165.hg.1	8.37	10.33	-3.89	9.12e-10	3e-08	MMP25-AS1	MMP25 antisense RNA 1	NonCoding
TC1700010440.hg.1	5.12	3.76	2.56	2.6e-12	1.32e-10	MMP28	matrix metallopeptidase 28	Multiple_Complex
TC2200007277.hg.1	4.2	5.49	-2.43	9.85e-10	3.21e-08	MPST	mercaptopyruvate sulfurtransferase	Multiple_Complex
TC1100012473.hg.1	10.47	12.33	-3.62	3.73e-13	2.19e-11	MPZL3	myelin protein zero-like 3	Multiple_Complex
TC1700010960.hg.1	6.49	7.76	-2.42	3.97e-08	9.2e-07	MRPL10	mitochondrial ribosomal protein L10	Multiple_Complex
TC1100009983.hg.1	11.71	10.55	2.23	1.74e-09	5.4e-08	MRPL17	mitochondrial ribosomal protein L17	Multiple_Complex
TC0100016021.hg.1	9.84	8.68	2.24	4.44e-07	7.93e-06	MRPL24	mitochondrial ribosomal protein L24	Multiple_Complex
TC1900007319.hg.1	9.5	8.49	2.02	1.83e-05	0.0002	MRPL34	mitochondrial ribosomal protein L34	Multiple_Complex
TC1200009735.hg.1	13.18	12.11	2.11	6.98e-05	0.0006	MRPL51	mitochondrial ribosomal protein L51	Multiple_Complex
TC0700012824.hg.1	10.28	8.64	3.13	1.32e-14	1.01e-12	MRPS33	mitochondrial ribosomal protein S33	Multiple_Complex
TC0800010783.hg.1	5.04	7.03	-3.97	2.97e-13	1.78e-11	MSC	musculin	Multiple_Complex
TC0600007610.hg.1	5.21	6.61	-2.64	8.58e-09	2.26e-07	MSH5; MSH5-SAPCD1; SAPCD1	mutS homolog 5; MSH5-SAPCD1 readthrough (NMD candidate); suppressor APC domain containing 1	Multiple_Complex
TC1000007010.hg.1	9.31	8.25	2.08	1.47e-09	4.62e-08	MSRB2	methionine sulfoxide reductase B2	Multiple_Complex
TC0100010133.hg.1	10.47	11.57	-2.14	1.22e-05	0.0001	MSTO1; MSTO2P	misato 1, mitochondrial distribution and morphology regulator; misato family member 2, pseudogene	Multiple_Complex
TC1600007957.hg.1	11.95	10.44	2.84	0.0006	0.0042	MT2A	metallothionein 2A	Multiple_Complex
TC1600007955.hg.1	8.9	7.81	2.14	6.25e-09	1.69e-07	MT3	metallothionein 3	Multiple_Complex
TC1500010900.hg.1	8.49	7.36	2.18	1.63e-06	2.48e-05	MTHFS	5,10-methenyltetrahydrofolate synthetase (5-formyltetrahydrofolate cyclo-ligase)	Multiple_Complex
TC0800011713.hg.1	6.2	8.66	-5.52	4.45e-09	1.25e-07	MTSS1	metastasis suppressor 1	Multiple_Complex
TC1600011560.hg.1	7.7	4.98	6.57	1.47e-18	2.04e-16	MTSS1L	metastasis suppressor 1-like	Multiple_Complex
TC0800009735.hg.1	8.16	5.65	5.69	1.77e-19	2.89e-17	MTUS1	microtubule associated tumor suppressor 1	Multiple_Complex
TC0300009974.hg.1	6.06	7.4	-2.54	0.0002	0.0014	MUC20; SDHAP2; MIR570; LINC00969	mucin 20, cell surface associated; succinate dehydrogenase complex subunit A, flavoprotein pseudogene 2; microRNA 570; long intergenic non-protein coding RNA 969	Multiple_Complex
TC0900008776.hg.1	11.63	12.82	-2.28	9.24e-10	3.03e-08	MVB12B	multivesicular body subunit 12B	Multiple_Complex
TC0400009765.hg.1	7.75	8.84	-2.13	1.11e-09	3.54e-08	MXD4; MIR4800	MAX dimerization protein 4; microRNA 4800	Multiple_Complex
TC1700011815.hg.1	10.02	12.75	-6.65	1.64e-17	1.93e-15	MXRA7	matrix-remodelling associated 7	Multiple_Complex
TC1900011382.hg.1	7.72	8.88	-2.23	2.62e-06	3.76e-05	MYADM	Memczak2013 ANTISENSE, CDS, coding, INTERNAL best transcript NM_001020819	NonCoding
TC0600009534.hg.1	10.94	7.87	8.4	9.62e-19	1.4e-16	MYB	v-myb avian myeloblastosis viral oncogene homolog	Multiple_Complex
TC0600013255.hg.1	5.82	4.7	2.17	8.4e-09	2.21e-07	MYB-AS1; MYB; RP1-32B1.3; rawjer	MYB antisense RNA 1 [Source:HGNC Symbol;Acc:HGNC:37457]; Memczak2013 ANTISENSE, coding, INTERNAL, intronic best transcript NM_005375; putative novel transcript; Transcript Identified by AceView	NonCoding
TC0800010685.hg.1	5.31	9	-12.88	1.08e-24	4.05e-22	MYBL1	v-myb avian myeloblastosis viral oncogene homolog-like 1	Multiple_Complex
TC0800008845.hg.1	10.52	7.91	6.07	6.33e-19	9.43e-17	MYC	v-myc avian myelocytomatosis viral oncogene homolog	Multiple_Complex
TC0400006472.hg.1	8.51	6.82	3.23	1.07e-13	6.97e-12	MYL5	myosin light chain 5	Multiple_Complex
TC1700010358.hg.1	6.57	8.64	-4.2	5.16e-10	1.81e-08	MYO1D	myosin ID	Multiple_Complex
TC1900009548.hg.1	7.08	12.21	-34.81	1.16e-36	2.49e-33	MYO1F	myosin IF	Multiple_Complex
TC1900006904.hg.1	6.53	8.18	-3.14	5.24e-12	2.52e-10	MYO1F	Memczak2013 ANTISENSE, CDS, coding, INTERNAL best transcript NM_012335	NonCoding
TC0700010941.hg.1	8.75	11.03	-4.84	6.59e-16	6.17e-14	MYO1G	myosin IG	Multiple_Complex
TC1500009457.hg.1	5.86	7.84	-3.93	4.3e-10	1.54e-08	MYO5A	myosin VA	Multiple_Complex
TC0600008569.hg.1	5.9	7.55	-3.13	9.31e-14	6.13e-12	MYO6	myosin VI	Multiple_Complex
TC1900007305.hg.1	8.79	10.02	-2.35	3.83e-12	1.89e-10	MYO9B	myosin IXB	Multiple_Complex
TC1100007922.hg.1	6.72	7.81	-2.13	0.0002	0.0018	NAA40	N(alpha)-acetyltransferase 40, NatD catalytic subunit	Multiple_Complex
TC0300012029.hg.1	12.49	14.23	-3.35	1.45e-18	2.04e-16	NAA50	N(alpha)-acetyltransferase 50, NatE catalytic subunit	Multiple_Complex
TC1100011199.hg.1	7.71	6.56	2.22	3.53e-08	8.25e-07	NAALADL1	N-acetylated alpha-linked acidic dipeptidase-like 1	Multiple_Complex
TC0200010273.hg.1	6.74	8.06	-2.5	2.61e-07	4.91e-06	NAB1	NGFI-A binding protein 1	Multiple_Complex
TC0200016582.hg.1	10.06	11.74	-3.21	4.9e-07	8.65e-06	NABP1	nucleic acid binding protein 1	Multiple_Complex
TC0500011049.hg.1	8.88	10.07	-2.27	0.0113	0.0409	NAIP	NLR family, apoptosis inhibitory protein	Multiple_Complex
TC0500013322.hg.1	7.57	8.63	-2.09	0.0006	0.0037	NAIP	NLR family, apoptosis inhibitory protein	Multiple_Complex
TC0X00010278.hg.1	6.64	5.59	2.08	2.36e-06	3.44e-05	NAP1L3	nucleosome assembly protein 1-like 3	Coding
TC2000008666.hg.1	9.08	10.09	-2.01	2.29e-05	0.0002	NAPB	N-ethylmaleimide-sensitive factor attachment protein, beta	Multiple_Complex
TC0300007278.hg.1	5.52	9.23	-13.08	1.73e-18	2.37e-16	NBEAL2	neurobeachin like 2	Multiple_Complex
TC0200008502.hg.1	4.16	7.19	-8.18	8.04e-24	2.69e-21	NCAPH	non-SMC condensin I complex subunit H	Multiple_Complex
TC1700009490.hg.1	7.17	8.88	-3.25	1.41e-08	3.54e-07	NCBP3	nuclear cap binding subunit 3	Multiple_Complex
TC2200007271.hg.1	5.77	6.78	-2.01	6.42e-06	8.27e-05	NCF4	neutrophil cytosolic factor 4	Multiple_Complex
TC1200007767.hg.1	9.04	10.12	-2.11	8.07e-06	0.0001	NCKAP1L	NCK-associated protein 1-like	Multiple_Complex
TC0800010749.hg.1	8.62	10.22	-3.03	4.11e-10	1.48e-08	NCOA2	nuclear receptor coactivator 2	Multiple_Complex
TC2000010002.hg.1	9.39	10.58	-2.28	1.66e-05	0.0002	NCOA6	nuclear receptor coactivator 6	Multiple_Complex
TC0600011439.hg.1	5.67	7.55	-3.69	4.87e-08	1.1e-06	NCR3	natural cytotoxicity triggering receptor 3	Multiple_Complex
TC0900008949.hg.1	5.12	6.3	-2.27	0.0002	0.0016	NCS1	neuronal calcium sensor 1	Multiple_Complex
TC1300007592.hg.1	4.41	5.65	-2.35	2.83e-08	6.72e-07	NDFIP2	Nedd4 family interacting protein 2	Multiple_Complex
TC0800012330.hg.1	6.34	7.37	-2.05	0.0001	0.0011	NDUFAF6	NADH dehydrogenase (ubiquinone) complex I, assembly factor 6	NonCoding
TC0300009610.hg.1	12.23	11.15	2.11	1.1e-05	0.0001	NDUFB5	NADH dehydrogenase (ubiquinone) 1 beta subcomplex, 5, 16kDa	Multiple_Complex
TC0600010810.hg.1	6.56	7.87	-2.49	2.29e-08	5.54e-07	NEDD9	neural precursor cell expressed, developmentally down-regulated 9	Multiple_Complex
TC0900008716.hg.1	5.4	7.08	-3.2	1.01e-18	1.46e-16	NEK6	NIMA-related kinase 6	Multiple_Complex
TC0100011096.hg.1	6.53	8.26	-3.31	2.43e-09	7.2e-08	NEK7	NIMA-related kinase 7	Multiple_Complex
TC1200010490.hg.1	13.39	11.35	4.12	4.09e-08	9.47e-07	NELL2	neural EGFL like 2	Multiple_Complex
TC1600010181.hg.1	5.3	7.61	-4.95	6.97e-15	5.66e-13	NETO2	neuropilin (NRP) and tolloid (TLL)-like 2	Multiple_Complex
TC2000009458.hg.1	10.66	13.74	-8.47	3.25e-29	2.32e-26	NFATC2	nuclear factor of activated T-cells, cytoplasmic, calcineurin-dependent 2	Multiple_Complex
TC0700006977.hg.1	8.47	9.66	-2.3	0.0001	0.001	NFE2L3	nuclear factor, erythroid 2-like 3	Multiple_Complex
TC0900010769.hg.1	8.16	9.21	-2.07	7.37e-05	0.0007	NFIL3	nuclear factor, interleukin 3 regulated	Coding
TC1900007115.hg.1	9.14	6.69	5.45	1.01e-17	1.22e-15	NFIX	nuclear factor I/X (CCAAT-binding transcription factor)	Multiple_Complex
TC0X00008002.hg.1	12.54	9.35	9.16	1.37e-21	3.04e-19	NGFRAP1	nerve growth factor receptor (TNFRSF16) associated protein 1	Multiple_Complex
TC1000008961.hg.1	11.11	12.41	-2.46	8.07e-10	2.7e-08	NHLRC2	NHL repeat containing 2	Multiple_Complex
TC0X00011305.hg.1	3.33	5.48	-4.44	1.24e-10	4.87e-09	NHSL2	NHS-like 2	Multiple_Complex
TC1200009558.hg.1	6.19	7.25	-2.08	1.98e-07	3.84e-06	NINJ2	ninjurin 2	Multiple_Complex
TC0800011211.hg.1	3.76	5.07	-2.48	1.21e-07	2.47e-06	NIPAL2	NIPA-like domain containing 2	Multiple_Complex
TC0300007482.hg.1	7.07	8.21	-2.2	1.31e-07	2.64e-06	NISCH	nischarin	Multiple_Complex
TC0300007483.hg.1	8.44	9.46	-2.02	7.41e-05	0.0007	NISCH	Zhang2013 ALT_DONOR, coding, INTERNAL, intronic best transcript NM_007184	NonCoding
TC1900011251.hg.1	10.23	17.41	-145.28	1.4e-45	2.14e-43	NKG7	natural killer cell granule protein 7	Coding
TC0300007165.hg.1	12.41	13.49	-2.12	7.56e-05	0.0007	NKTR	natural killer cell triggering receptor	Multiple_Complex
TC1600009198.hg.1	8.25	9.91	-3.16	1.31e-07	2.64e-06	NLRC3	NLR family, CARD domain containing 3	Multiple_Complex
TC1600007986.hg.1	10.71	11.97	-2.39	0.0034	0.0162	NLRC5	NLR family, CARD domain containing 5	Multiple_Complex
TC1700008282.hg.1	13.27	11.74	2.88	2.09e-10	7.81e-09	NME1; NME1-NME2; NME2	NME/NM23 nucleoside diphosphate kinase 1; NME1-NME2 readthrough; NME/NM23 nucleoside diphosphate kinase 2	Multiple_Complex
TC1600011317.hg.1	11.87	10.68	2.28	9.65e-08	2e-06	NME4	NME/NM23 nucleoside diphosphate kinase 4	Multiple_Complex
TC1600007827.hg.1	5.36	6.88	-2.88	7.48e-11	3.05e-09	NOD2	nucleotide-binding oligomerization domain containing 2	Multiple_Complex
TC1700008350.hg.1	8.02	4.65	10.35	1.09e-31	9.74e-29	NOG	noggin	Coding
TC1500008984.hg.1	12.96	11.96	2	3.5e-07	6.42e-06	NOP10	NOP10 ribonucleoprotein	Multiple_Complex
TC0200008627.hg.1	6.9	4.61	4.89	1.01e-18	1.46e-16	NPAS2	neuronal PAS domain protein 2	Multiple_Complex
TC1800008285.hg.1	8.21	11.06	-7.2	8.63e-20	1.47e-17	NPC1	Niemann-Pick disease, type C1	Multiple_Complex
TC1400009697.hg.1	8.53	7.37	2.24	8.26e-07	1.38e-05	NPC2; MIR4709	Niemann-Pick disease, type C2; microRNA 4709	Multiple_Complex
TC0900012291.hg.1	6.54	7.69	-2.21	9.83e-07	1.6e-05	NPDC1	neural proliferation, differentiation and control, 1	Multiple_Complex
TC1600011355.hg.1	10.83	12.15	-2.5	0.0002	0.0013	NPIPA1	nuclear pore complex interacting protein family, member A1	Multiple_Complex
TC1600011354.hg.1	11.34	12.59	-2.39	6.04e-05	0.0006	NPIPA2	nuclear pore complex interacting protein family, member A2	Coding
TC1600011353.hg.1	11.34	12.63	-2.44	4.04e-05	0.0004	NPIPA3	nuclear pore complex interacting protein family, member A3	Multiple_Complex
TC1600009524.hg.1	11.66	13.08	-2.68	9.37e-05	0.0008	NPIPA5	nuclear pore complex interacting protein family, member A5	Coding
TC1600007037.hg.1	14.13	15.33	-2.29	5.5e-05	0.0005	NPIPA7	nuclear pore complex interacting protein family, member A7	Coding
TC1600007030.hg.1	10.81	11.92	-2.16	5.21e-05	0.0005	NPIPA7; NPIPA8; PKD1P1	nuclear pore complex interacting protein family, member A7; nuclear pore complex interacting protein family, member A8; polycystic kidney disease 1 (autosomal dominant) pseudogene 1	Multiple_Complex
TC1600011487.hg.1	12.31	13.49	-2.28	0.0001	0.001	NPIPA8	nuclear pore complex interacting protein family, member A8	Coding
TC1600009916.hg.1	13.98	15.59	-3.05	9.48e-06	0.0001	NPIPB11	nuclear pore complex interacting protein family, member B11	Coding
TC1600008407.hg.1	11.36	12.7	-2.52	4.42e-05	0.0004	NPIPB15	nuclear pore complex interacting protein family, member B15	Multiple_Complex
TC1600011501.hg.1	13.3	14.9	-3.02	2.33e-06	3.4e-05	NPIPB3	nuclear pore complex interacting protein family, member B3	Multiple_Complex
TC1600011505.hg.1	13.39	15.07	-3.19	5.49e-06	7.24e-05	NPIPB4	nuclear pore complex interacting protein family, member B4	Multiple_Complex
TC1600009958.hg.1	13.19	14.87	-3.19	2.84e-06	4.05e-05	NPIPB4	nuclear pore complex interacting protein family, member B4	Multiple_Complex
TC1600011364.hg.1	13.22	14.7	-2.8	5.87e-06	7.68e-05	NPIPB5	nuclear pore complex interacting protein family, member B5	Multiple_Complex
TC1600009855.hg.1	12.84	14.11	-2.42	3.21e-05	0.0003	NPIPB6	nuclear pore complex interacting protein family, member B6	Coding
TC1600007353.hg.1	14.16	15.56	-2.64	1.22e-05	0.0001	NPIPB8	nuclear pore complex interacting protein family, member B8	Coding
TC1600011365.hg.1	11.56	12.85	-2.45	3.25e-05	0.0003	NPIPB9	nuclear pore complex interacting protein family, member B9	Coding
TC1000011658.hg.1	9.42	7.76	3.15	5.35e-14	3.62e-12	NPM3	nucleophosmin/nucleoplasmin 3	Multiple_Complex
TC0600014055.hg.1	7.69	8.87	-2.27	1.92e-05	0.0002	NQO2	NAD(P)H dehydrogenase, quinone 2	Multiple_Complex
TC0300006694.hg.1	11.3	12.37	-2.11	0.0005	0.0031	NR2C2	nuclear receptor subfamily 2, group C, member 2	Multiple_Complex
TC0500012340.hg.1	11.06	12.79	-3.31	5.74e-20	9.93e-18	NR3C1	nuclear receptor subfamily 3, group C, member 1 (glucocorticoid receptor)	Multiple_Complex
TC0700012230.hg.1	9.46	7.07	5.22	7.76e-23	2.16e-20	NRCAM	neuronal cell adhesion molecule	Multiple_Complex
TC0500011705.hg.1	8.69	5.87	7.08	2.95e-23	9.04e-21	NREP	neuronal regeneration related protein	Multiple_Complex
TC2100008545.hg.1	7.61	6.29	2.49	3.61e-09	1.04e-07	NRIP1	nuclear receptor interacting protein 1	Multiple_Complex
TC0600011377.hg.1	7.99	9.58	-3.02	4.47e-12	2.17e-10	NRM	nurim (nuclear envelope membrane protein)	Multiple_Complex
TC1600009829.hg.1	7.42	6.41	2.01	2.11e-06	3.11e-05	NSMCE1	NSE1 homolog, SMC5-SMC6 complex component	Multiple_Complex
TC0700013391.hg.1	8.28	9.29	-2.02	0.0018	0.0096	NSUN5P1	NOP2/Sun domain family, member 5 pseudogene 1	Multiple_Complex
TC0300011173.hg.1	6.98	9.09	-4.31	2.18e-07	4.18e-06	NT5DC2	5-nucleotidase domain containing 2	Multiple_Complex
TC0600008697.hg.1	7.93	6.39	2.91	3.56e-09	1.02e-07	NT5E	5-nucleotidase, ecto (CD73)	Multiple_Complex
TC0100017064.hg.1	6.26	4.88	2.61	2.27e-09	6.84e-08	NUAK2	NUAK family, SNF1-like kinase, 2	Multiple_Complex
TC1100012976.hg.1	13.22	11.01	4.6	4.08e-08	9.44e-07	NUCB2	nucleobindin 2	Multiple_Complex
TC1700008895.hg.1	9.22	10.31	-2.14	5.34e-07	9.33e-06	NUP85	nucleoporin 85kDa	Multiple_Complex
TC1500006999.hg.1	4.53	5.82	-2.45	1.41e-07	2.81e-06	NUSAP1	nucleolar and spindle associated protein 1	Multiple_Complex
TC1100011101.hg.1	9.79	11.11	-2.49	1.38e-06	2.14e-05	NXF1	nuclear RNA export factor 1	Multiple_Complex
TC2000006956.hg.1	9.53	8.42	2.16	1.43e-10	5.53e-09	NXT1	nuclear transport factor 2-like export factor 1	Multiple_Complex
TC1200012190.hg.1	7.75	10.66	-7.47	3.19e-19	5.18e-17	OASL	2-5-oligoadenylate synthetase-like	Multiple_Complex
TC1000011736.hg.1	10.99	9.36	3.1	4.54e-14	3.15e-12	OBFC1	oligonucleotide/oligosaccharide-binding fold containing 1	Multiple_Complex
TC0400010636.hg.1	13.47	12.26	2.32	4.01e-09	1.14e-07	OCIAD2	OCIA domain containing 2	Multiple_Complex
TC0700006632.hg.1	6.29	5.14	2.22	1.1e-05	0.0001	OCM	oncomodulin	Coding
TC0900008869.hg.1	8.43	9.55	-2.17	4.18e-05	0.0004	ODF2	outer dense fiber of sperm tails 2	Multiple_Complex
TC0100014794.hg.1	11.11	12.63	-2.87	5.56e-11	2.31e-09	ODF2L	outer dense fiber of sperm tails 2-like	Multiple_Complex
TC0700007392.hg.1	9.99	11.35	-2.57	5.42e-11	2.26e-09	OGDH	oxoglutarate (alpha-ketoglutarate) dehydrogenase (lipoamide)	Multiple_Complex
TC0600008486.hg.1	6.24	7.58	-2.53	7.99e-07	1.34e-05	OGFRL1	opioid growth factor receptor-like 1	Multiple_Complex
TC0X00007573.hg.1	11.62	12.89	-2.41	0.0004	0.003	OGT	O-linked N-acetylglucosamine (GlcNAc) transferase	Multiple_Complex
TC1900009603.hg.1	6.74	5.46	2.43	5.26e-08	1.17e-06	OLFM2	olfactomedin 2	Multiple_Complex
TC0100017947.hg.1	7.12	5.77	2.55	7.27e-07	1.23e-05	OPN3	opsin 3	Multiple_Complex
TC1000006816.hg.1	10.12	11.67	-2.93	3.76e-13	2.21e-11	OPTN	optineurin	Multiple_Complex
TC0900012163.hg.1	4.55	5.63	-2.11	3.8e-05	0.0004	ORM2	orosomucoid 2	Multiple_Complex
TC1200007895.hg.1	10.04	11.11	-2.11	7.54e-09	2.01e-07	OS9	osteosarcoma amplified 9, endoplasmic reticulum lectin	Multiple_Complex
TC0700010504.hg.1	5.54	7.94	-5.27	1.37e-12	7.35e-11	OSBPL3	oxysterol binding protein-like 3	Multiple_Complex
TC1700010959.hg.1	5.2	7.23	-4.08	2.7e-13	1.62e-11	OSBPL7	oxysterol binding protein-like 7	Multiple_Complex
TC0900007604.hg.1	9.77	10.77	-2	5.77e-11	2.39e-09	OSTF1	osteoclast stimulating factor 1	Multiple_Complex
TC0500006822.hg.1	10.94	12.3	-2.55	7.88e-07	1.33e-05	OTULIN	OTU deubiquitinase with linear linkage specificity	Multiple_Complex
TC0300013795.hg.1	7.4	6.36	2.05	2.76e-08	6.59e-07	OXNAD1	oxidoreductase NAD-binding domain containing 1	Multiple_Complex
TC1700012337.hg.1	5.75	7.7	-3.87	1.82e-08	4.48e-07	P2RX5	purinergic receptor P2X, ligand gated ion channel, 5	Multiple_Complex
TC1700012338.hg.1	6.09	7.32	-2.35	2.33e-07	4.44e-06	P2RX5-TAX1BP3	P2RX5-TAX1BP3 readthrough (NMD candidate)	Multiple_Complex
TC0300012813.hg.1	5.43	7.35	-3.78	4.27e-08	9.78e-07	P2RY14	purinergic receptor P2Y, G-protein coupled, 14	Coding
TC0X00008911.hg.1	10.79	12.08	-2.45	1.18e-05	0.0001	P2RY8	purinergic receptor P2Y, G-protein coupled, 8	Multiple_Complex
TC0Y00006887.hg.1	10.79	12.08	-2.45	1.18e-05	0.0001	P2RY8	Homo sapiens purinergic receptor P2Y, G-protein coupled, 8 (P2RY8), mRNA.; purinergic receptor P2Y, G-protein coupled, 8 [Source:HGNC Symbol;Acc:HGNC:15524]; Homo sapiens purinergic receptor P2Y, G-protein coupled, 8, mRNA (cDNA clone MGC:50878 IMAGE:5787268), complete cds.	Multiple_Complex
TC0100013796.hg.1	11.25	10.24	2.02	7.49e-09	2e-07	PABPC4	poly(A) binding protein, cytoplasmic 4 (inducible form)	Multiple_Complex
TC0400007592.hg.1	9.62	8.47	2.22	8.36e-07	1.39e-05	PAICS	phosphoribosylaminoimidazole carboxylase, phosphoribosylaminoimidazole succinocarboxamide synthetase	Multiple_Complex
TC0400009258.hg.1	5.38	6.56	-2.27	2.36e-05	0.0003	PALLD	palladin, cytoskeletal associated protein	Multiple_Complex
TC1000011382.hg.1	3.99	5.13	-2.2	6.69e-07	1.14e-05	PANK1	pantothenate kinase 1	Multiple_Complex
TC0300008561.hg.1	12.87	13.92	-2.07	0.0004	0.0029	PARP14	poly(ADP-ribose) polymerase family member 14	Multiple_Complex
TC0300008559.hg.1	9.72	12.26	-5.83	1.16e-11	5.31e-10	PARP15	poly(ADP-ribose) polymerase family member 15	Multiple_Complex
TC1300008359.hg.1	8.33	9.46	-2.19	1.51e-06	2.31e-05	PARP4	poly(ADP-ribose) polymerase family member 4	Multiple_Complex
TC1500009263.hg.1	8.29	10.7	-5.33	1.5e-10	5.8e-09	PATL2	protein associated with topoisomerase II homolog 2 (yeast)	Multiple_Complex
TC1900010067.hg.1	7.99	9.31	-2.49	4.46e-08	1.02e-06	PBX4	pre-B-cell leukemia homeobox 4	Multiple_Complex
TC0300013988.hg.1	6.84	8.75	-3.77	1.05e-10	4.15e-09	PCBP4	poly(rC) binding protein 4	Multiple_Complex
TC2100007465.hg.1	4.48	5.67	-2.28	0.0022	0.0112	PCNT	pericentrin	Multiple_Complex
TC0900007618.hg.1	7.12	4.8	4.99	1e-17	1.22e-15	PCSK5	proprotein convertase subtilisin/kexin type 5	Multiple_Complex
TC1100012444.hg.1	9.98	11.02	-2.07	0.0003	0.0024	PCSK7	proprotein convertase subtilisin/kexin type 7	Multiple_Complex
TC0500009061.hg.1	10.16	9	2.25	2.23e-06	3.27e-05	PCYOX1L	prenylcysteine oxidase 1 like	Multiple_Complex
TSUnmapped00000819.hg.1	9.41	10.89	-2.79	1.04e-10	4.13e-09	PCYT1A	phosphate cytidylyltransferase 1, choline, alpha	Coding
TC0300014093.hg.1	9.78	11.21	-2.71	7.64e-08	1.63e-06	PCYT1A	phosphate cytidylyltransferase 1, choline, alpha	Multiple_Complex
TC1900011708.hg.1	12.07	9.94	4.37	1.74e-17	2.03e-15	PDCD2L	programmed cell death 2-like	Multiple_Complex
TC1100006923.hg.1	12.32	11.03	2.46	9.57e-07	1.57e-05	PDE3B	phosphodiesterase 3B, cGMP-inhibited	Multiple_Complex
TC0100008625.hg.1	9.45	11.81	-5.15	4.96e-14	3.41e-12	PDE4B	phosphodiesterase 4B, cAMP-specific	Multiple_Complex
TC2100007263.hg.1	8.01	4.95	8.35	5.13e-14	3.5e-12	PDE9A	phosphodiesterase 9A	Multiple_Complex
TC0200011731.hg.1	9.87	11.65	-3.45	2.32e-14	1.69e-12	PDIA6	protein disulfide isomerase family A, member 6	Multiple_Complex
TC0200009978.hg.1	10.47	9.26	2.3	4.12e-07	7.42e-06	PDK1	pyruvate dehydrogenase kinase, isozyme 1	Multiple_Complex
TC0X00011174.hg.1	3.33	5	-3.18	6.28e-08	1.37e-06	PDZD4	PDZ domain containing 4	Multiple_Complex
TC1000011948.hg.1	8.2	9.24	-2.06	6.5e-05	0.0006	PDZD8	PDZ domain containing 8	Multiple_Complex
TC1700011442.hg.1	10.82	8.94	3.67	3.25e-09	9.38e-08	PECAM1	platelet/endothelial cell adhesion molecule 1	Multiple_Complex
TC0600013326.hg.1	6.18	8.13	-3.85	9.03e-16	8.35e-14	PERP	PERP, TP53 apoptosis effector	Coding
TC0600012432.hg.1	7.52	8.58	-2.08	1.85e-05	0.0002	PGM3	phosphoglucomutase 3	Multiple_Complex
TC0600014188.hg.1	7.65	10.25	-6.05	3.28e-19	5.27e-17	PHACTR2	phosphatase and actin regulator 2	Multiple_Complex
TC0600009697.hg.1	4.63	6.59	-3.88	5.27e-11	2.2e-09	PHACTR2	Jeck2013 ALT_ACCEPTOR, ALT_DONOR, coding, INTERNAL, intronic best transcript NM_001100164	NonCoding
TC1100010688.hg.1	11.78	12.84	-2.09	3.39e-07	6.24e-06	PHF21A	PHD finger protein 21A	Multiple_Complex
TC0100009621.hg.1	6.45	4.84	3.05	7.36e-18	9.08e-16	PHGDH	phosphoglycerate dehydrogenase	Multiple_Complex
TC1500006948.hg.1	9.25	8.21	2.05	1.66e-06	2.52e-05	PHGR1	proline/histidine/glycine-rich 1	Multiple_Complex
TC1200011310.hg.1	7.96	8.96	-2.01	3.36e-06	4.68e-05	PHLDA1	pleckstrin homology-like domain, family A, member 1	Multiple_Complex
TC0300008324.hg.1	5.25	6.8	-2.93	1.87e-08	4.6e-07	PHLDB2; PLCXD2	pleckstrin homology-like domain, family B, member 2; phosphatidylinositol-specific phospholipase C, X domain containing 2	Multiple_Complex
TC0700008149.hg.1	6.32	7.34	-2.03	0.0005	0.0033	PHTF2	putative homeodomain transcription factor 2	Multiple_Complex
TC0100015591.hg.1	8.59	9.67	-2.11	8.27e-06	0.0001	PIAS3	protein inhibitor of activated STAT 3	Multiple_Complex
TC1100011838.hg.1	10.88	12.65	-3.42	2.1e-25	9.2e-23	PICALM	phosphatidylinositol binding clathrin assembly protein	Multiple_Complex
TC1600011228.hg.1	7.12	9.51	-5.25	3.75e-17	4.09e-15	PIEZO1	piezo-type mechanosensitive ion channel component 1	Multiple_Complex
TC1000011524.hg.1	7.58	9.3	-3.3	8.53e-14	5.66e-12	PIK3AP1	phosphoinositide-3-kinase adaptor protein 1	Multiple_Complex
TC0700008743.hg.1	8.54	9.8	-2.39	4.88e-10	1.73e-08	PIK3CG	phosphatidylinositol-4,5-bisphosphate 3-kinase, catalytic subunit gamma	Multiple_Complex
TC2200008475.hg.1	15	13.83	2.25	5.41e-08	1.21e-06	PIK3IP1	phosphoinositide-3-kinase interacting protein 1	Multiple_Complex
TC0500007641.hg.1	10.41	13.28	-7.3	6.26e-18	7.8e-16	PIK3R1	phosphoinositide-3-kinase, regulatory subunit 1 (alpha)	Multiple_Complex
TC1700009707.hg.1	4.29	5.53	-2.36	8.91e-07	1.47e-05	PIK3R6	phosphoinositide-3-kinase, regulatory subunit 6	Multiple_Complex
TC1000010026.hg.1	7.12	8.27	-2.22	0.0014	0.0079	PIP4K2A	phosphatidylinositol-5-phosphate 4-kinase, type II, alpha	NonCoding
TC0800008028.hg.1	9.54	7.86	3.2	1.16e-08	2.99e-07	PKIA	protein kinase (cAMP-dependent, catalytic) inhibitor alpha	Multiple_Complex
TC2000007457.hg.1	6.54	5.42	2.17	4.15e-08	9.55e-07	PKIG	protein kinase (cAMP-dependent, catalytic) inhibitor gamma	Multiple_Complex
TC1100011126.hg.1	5.38	7.59	-4.63	7.68e-15	6.22e-13	PLA2G16	phospholipase A2, group XVI	Multiple_Complex
TC0400011192.hg.1	16.79	15.31	2.79	3.26e-14	2.3e-12	PLAC8	placenta specific 8	Multiple_Complex
TC0800010506.hg.1	9.6	6.22	10.39	2.21e-17	2.48e-15	PLAG1	pleiomorphic adenoma gene 1	Multiple_Complex
TC2000009887.hg.1	5.05	6.96	-3.74	7.04e-10	2.39e-08	PLCB1	phospholipase C, beta 1 (phosphoinositide-specific)	Multiple_Complex
TC1500009089.hg.1	6.32	7.47	-2.22	0.0002	0.0016	PLCB2	phospholipase C, beta 2	Multiple_Complex
TC0300010739.hg.1	5.93	7.12	-2.28	4.09e-10	1.47e-08	PLCD1	phospholipase C, delta 1	Multiple_Complex
TC1600008607.hg.1	4.33	7.12	-6.91	2.02e-11	9.01e-10	PLCG2	phospholipase C, gamma 2 (phosphatidylinositol-specific)	Multiple_Complex
TC0800012176.hg.1	6.22	7.27	-2.08	0.002	0.0107	PLEC	plectin	Multiple_Complex
TC0200007895.hg.1	5.32	9.66	-20.17	2.03e-29	1.5e-26	PLEK	pleckstrin	Multiple_Complex
TC0800007362.hg.1	9.88	10.9	-2.03	1.1e-07	2.25e-06	PLEKHA2	pleckstrin homology domain containing, family A (phosphoinositide binding specific) member 2	Multiple_Complex
TC1200007010.hg.1	4.28	7.38	-8.58	2.36e-20	4.4e-18	PLEKHA5	pleckstrin homology domain containing, family A member 5	Multiple_Complex
TC0600009843.hg.1	4.27	5.62	-2.54	2.9e-10	1.07e-08	PLEKHG1	pleckstrin homology domain containing, family G (with RhoGef domain) member 1	Multiple_Complex
TC1900008058.hg.1	6.3	8.07	-3.39	3.49e-14	2.45e-12	PLEKHG2	pleckstrin homology domain containing, family G (with RhoGef domain) member 2	Multiple_Complex
TC1400007445.hg.1	4.13	5.52	-2.61	4.92e-10	1.73e-08	PLEKHG3	pleckstrin homology domain containing, family G (with RhoGef domain) member 3	Multiple_Complex
TC0X00008836.hg.1	6.2	8.03	-3.56	8.13e-15	6.53e-13	PLXNA3	plexin A3	Multiple_Complex
TC2200009152.hg.1	7.33	5.09	4.73	3.31e-19	5.27e-17	PLXNB2	plexin B2	Multiple_Complex
TC0300012397.hg.1	4.74	8.72	-15.73	2.61e-21	5.55e-19	PLXND1	plexin D1	Multiple_Complex
TC0X00009018.hg.1	8.04	6.16	3.67	4.54e-14	3.15e-12	PNPLA4	patatin-like phospholipase domain containing 4	Coding
TC0100015787.hg.1	5.5	6.65	-2.22	0.0015	0.0082	POGZ	Transcript Identified by AceView, Entrez Gene ID(s) 23126	Unassigned
TC1900011787.hg.1	7.08	5.95	2.19	1.88e-06	2.82e-05	POLD1	polymerase (DNA directed), delta 1, catalytic subunit	Multiple_Complex
TC0900009003.hg.1	7.09	8.09	-2.01	2.51e-07	4.76e-06	POMT1	protein-O-mannosyltransferase 1	Multiple_Complex
TC0500009072.hg.1	6.63	5.24	2.63	1.46e-12	7.83e-11	PPARGC1B	peroxisome proliferator-activated receptor gamma, coactivator 1 beta	Multiple_Complex
TC0400011013.hg.1	8	6.33	3.19	4.3e-07	7.68e-06	PPBP	pro-platelet basic protein	Coding
TC1100006760.hg.1	6.37	4.19	4.55	1.76e-16	1.76e-14	PPFIBP2	PTPRF interacting protein, binding protein 2 (liprin beta 2)	Multiple_Complex
TC1500009223.hg.1	5.35	6.37	-2.03	2.46e-06	3.56e-05	PPIP5K1	diphosphoinositol pentakisphosphate kinase 1	Multiple_Complex
TC2000007336.hg.1	8.34	10.46	-4.36	2.08e-17	2.37e-15	PPP1R16B	protein phosphatase 1, regulatory subunit 16B	Multiple_Complex
TC2000007337.hg.1	7.91	8.94	-2.04	6.45e-08	1.4e-06	PPP1R16B	Transcript Identified by AceView, Entrez Gene ID(s) 26051	Unassigned
TC1900011765.hg.1	4.72	5.97	-2.37	0.0002	0.0018	PPP1R37	protein phosphatase 1, regulatory subunit 37	Multiple_Complex
TC0500013384.hg.1	5.65	8.86	-9.26	7.17e-28	4.27e-25	PPP2R2B	protein phosphatase 2, regulatory subunit B, beta	Multiple_Complex
TC0100011520.hg.1	8.89	10.12	-2.34	1.99e-07	3.84e-06	PPP2R5A	protein phosphatase 2, regulatory subunit B, alpha	Multiple_Complex
TC0400011440.hg.1	8.41	9.88	-2.76	5.83e-06	7.64e-05	PPP3CA	protein phosphatase 3, catalytic subunit, alpha isozyme	Multiple_Complex
TC0600007635.hg.1	9.32	8.31	2.01	7.61e-05	0.0007	PPT2; EGFL8; PPT2-EGFL8	palmitoyl-protein thioesterase 2; EGF-like-domain, multiple 8; PPT2-EGFL8 readthrough (NMD candidate)	Multiple_Complex
TC0200006715.hg.1	7.89	9.19	-2.47	8.34e-12	3.92e-10	PQLC3	PQ loop repeat containing 3	Multiple_Complex
TC1500010463.hg.1	4.64	6.3	-3.17	1.14e-06	1.83e-05	PRC1	protein regulator of cytokinesis 1	Multiple_Complex
TC0600008972.hg.1	7.07	13.89	-113.01	1.4e-45	5.45e-43	PRDM1	PR domain containing 1, with ZNF domain	Multiple_Complex
TC2100008227.hg.1	7.67	8.68	-2.01	0.0039	0.0178	PRDM15	PR domain containing 15	Multiple_Complex
TC2000009357.hg.1	11.52	13.24	-3.29	1.2e-11	5.47e-10	PREX1	phosphatidylinositol-3,4,5-trisphosphate-dependent Rac exchange factor 1	Multiple_Complex
TC1000010925.hg.1	6.21	11.96	-53.96	3.41e-36	6.65e-33	PRF1	perforin 1 (pore forming protein)	Multiple_Complex
TC0100015627.hg.1	6.44	7.6	-2.23	1.63e-08	4.04e-07	PRKAB2	protein kinase, AMP-activated, beta 2 non-catalytic subunit	Multiple_Complex
TC1700008661.hg.1	7.78	6.5	2.43	8.62e-10	2.86e-08	PRKCA	protein kinase C, alpha	Multiple_Complex
TC1600007240.hg.1	8.74	10.04	-2.46	1.32e-10	5.14e-09	PRKCB	protein kinase C, beta	Multiple_Complex
TC1000009714.hg.1	10.24	11.85	-3.06	5.64e-10	1.96e-08	PRKCQ	protein kinase C, theta	Multiple_Complex
TC0800010360.hg.1	7.56	8.91	-2.55	7.71e-05	0.0007	PRKDC	protein kinase, DNA-activated, catalytic polypeptide	Multiple_Complex
TC0X00008945.hg.1	8.34	9.95	-3.04	1.14e-12	6.18e-11	PRKX	protein kinase, X-linked	Multiple_Complex
TC2100007474.hg.1	12.65	11.09	2.95	3.98e-16	3.8e-14	PRMT2	protein arginine methyltransferase 2	Multiple_Complex
TC0300011517.hg.1	5.72	8.8	-8.46	3.06e-11	1.33e-09	PROK2	prokineticin 2	Coding
TC1900008547.hg.1	8.42	9.42	-2.01	0.0019	0.0102	PRR12	proline rich 12	Multiple_Complex
TC1100007301.hg.1	4.8	9.25	-21.87	1.17e-28	7.87e-26	PRR5L	proline rich 5 like	Multiple_Complex
TC0600014269.hg.1	6.35	5.32	2.04	3.32e-11	1.44e-09	PRRT1	proline-rich transmembrane protein 1	Multiple_Complex
TC1400008689.hg.1	9.14	7.62	2.87	4.66e-08	1.06e-06	PSMB5	proteasome subunit beta 5	Multiple_Complex
TC1500007929.hg.1	6.39	7.86	-2.77	1.59e-10	6.05e-09	PSTPIP1	proline-serine-threonine phosphatase interacting protein 1	Multiple_Complex
TC1200009852.hg.1	4.5	7.16	-6.34	4.61e-13	2.67e-11	PZP	pregnancy-zone protein	Multiple_Complex
TC1900006488.hg.1	10.81	11.86	-2.07	0.0002	0.0014	PTBP1; MIR4745	polypyrimidine tract binding protein 1; microRNA 4745	Multiple_Complex
TC0800008295.hg.1	11.77	10.72	2.08	1.07e-09	3.43e-08	PTDSS1	phosphatidylserine synthase 1	Multiple_Complex
TC1400007161.hg.1	4.34	7.35	-8.07	3.73e-18	4.7e-16	PTGDR	prostaglandin D2 receptor (DP)	Coding
TC1400007165.hg.1	7.31	9.78	-5.53	2.32e-13	1.41e-11	PTGER2	prostaglandin E receptor 2	Coding
TC0500007231.hg.1	9.61	11.02	-2.65	0.0001	0.001	PTGER4	prostaglandin E receptor 4 (subtype EP4)	Multiple_Complex
TC0800007102.hg.1	9.52	10.54	-2.02	1.18e-06	1.87e-05	PTK2B	protein tyrosine kinase 2 beta	Multiple_Complex
TC1200006643.hg.1	5.88	8.46	-6.01	4.27e-17	4.61e-15	PTMS	parathymosin	Multiple_Complex
TC0700008141.hg.1	6.03	7.55	-2.88	1.22e-08	3.12e-07	PTPN12	protein tyrosine phosphatase, non-receptor type 12	Multiple_Complex
TC0100015333.hg.1	8.76	11.33	-5.93	6.08e-21	1.22e-18	PTPN22	protein tyrosine phosphatase, non-receptor type 22 (lymphoid)	Multiple_Complex
TC1200006657.hg.1	9.02	7.73	2.45	5.52e-07	9.58e-06	PTPN6	protein tyrosine phosphatase, non-receptor type 6	Multiple_Complex
TC1500010893.hg.1	4.55	5.6	-2.06	1.93e-05	0.0002	PTPN9	protein tyrosine phosphatase, non-receptor type 9	Multiple_Complex
TC1100007507.hg.1	7	9.26	-4.8	1.81e-12	9.58e-11	PTPRJ	protein tyrosine phosphatase, receptor type, J	Multiple_Complex
TC0600013126.hg.1	6.61	3.75	7.25	1.58e-22	4.09e-20	PTPRK	protein tyrosine phosphatase, receptor type, K	Multiple_Complex
TC1800006589.hg.1	4.54	9.73	-36.67	1.33e-20	2.52e-18	PTPRM	protein tyrosine phosphatase, receptor type, M	Multiple_Complex
TC0200011990.hg.1	9.91	8.55	2.56	7.72e-07	1.3e-05	PTRHD1	peptidyl-tRNA hydrolase domain containing 1	Multiple_Complex
TC0500009281.hg.1	6.6	7.76	-2.25	4.02e-06	5.49e-05	PTTG1	pituitary tumor-transforming 1	Multiple_Complex
TC1100012535.hg.1	5.11	6.35	-2.35	0.0019	0.0101	PVRL1	poliovirus receptor-related 1 (herpesvirus entry mediator C)	Multiple_Complex
TC0100010243.hg.1	8.82	13.04	-18.64	1.55e-26	7.71e-24	PYHIN1	pyrin and HIN domain family, member 1	Multiple_Complex
TC1900006893.hg.1	9.58	11.02	-2.73	1.52e-05	0.0002	RAB11B	RAB11B, member RAS oncogene family	Multiple_Complex
TC0800010138.hg.1	5.96	7.85	-3.71	1.81e-15	1.6e-13	RAB11FIP1	RAB11 family interacting protein 1 (class I)	Multiple_Complex
TC0100015895.hg.1	8.79	6.78	4.04	2.54e-14	1.84e-12	RAB13	RAB13, member RAS oncogene family	Multiple_Complex
TC1500010866.hg.1	7.81	9.39	-2.99	1.11e-11	5.13e-10	RAB27A	RAB27A, member RAS oncogene family	Multiple_Complex
TC1800007360.hg.1	4.87	7.59	-6.59	1.8e-18	2.44e-16	RAB27B	RAB27B, member RAS oncogene family	Multiple_Complex
TC0X00008401.hg.1	10.04	7.83	4.61	3.46e-15	2.96e-13	RAB33A	RAB33A, member RAS oncogene family	Coding
TC1700010207.hg.1	7.35	5.92	2.71	0.0006	0.004	RAB34	RAB34, member RAS oncogene family	Multiple_Complex
TC0300014042.hg.1	10.15	8.11	4.12	1.66e-13	1.05e-11	RAB43	RAB43, member RAS oncogene family	Coding
TC0100010672.hg.1	8.54	10.07	-2.9	8.76e-10	2.89e-08	RABGAP1L	RAB GTPase activating protein 1-like	Multiple_Complex
TC1200010650.hg.1	6.35	7.62	-2.41	8.35e-06	0.0001	RACGAP1	Rac GTPase activating protein 1	Multiple_Complex
TC0800011137.hg.1	5.35	4.27	2.11	7.24e-05	0.0007	RAD54B; FSBP	RAD54 homolog B (S. cerevisiae); fibrinogen silencer binding protein	Multiple_Complex
TC0X00009179.hg.1	5.53	4.29	2.37	2.92e-15	2.54e-13	RAI2	retinoic acid induced 2	Multiple_Complex
TC0700007271.hg.1	10.91	9.78	2.18	8.95e-12	4.19e-10	RALA	v-ral simian leukemia viral oncogene homolog A (ras related)	Multiple_Complex
TC1400008945.hg.1	9.65	10.74	-2.13	1.63e-08	4.04e-07	RALGAPA1	Ral GTPase activating protein, alpha subunit 1 (catalytic)	Multiple_Complex
TC0100010755.hg.1	5.53	4.5	2.03	1.86e-06	2.8e-05	RALGPS2	Ral GEF with PH domain and SH3 binding motif 2	Multiple_Complex
TC0200008807.hg.1	6.72	7.87	-2.22	0.0002	0.0016	RANBP2	RAN binding protein 2	Multiple_Complex
TC1700006569.hg.1	3.89	5.29	-2.64	2.05e-07	3.95e-06	RAP1GAP2	RAP1 GTPase activating protein 2	Multiple_Complex
TC0900011778.hg.1	8.69	10.52	-3.54	1.97e-09	6.05e-08	RAPGEF1	Rap guanine nucleotide exchange factor 1	Multiple_Complex
TC0500009353.hg.1	11.39	10.33	2.07	9.92e-05	0.0009	RARS	arginyl-tRNA synthetase	Multiple_Complex
TC1900009872.hg.1	9.54	11.08	-2.91	1.2e-08	3.08e-07	RASAL3	RAS protein activator like 3	Multiple_Complex
TC1000010432.hg.1	5.79	7.01	-2.34	5.06e-09	1.4e-07	RASGEF1A	RasGEF domain family member 1A	Multiple_Complex
TC0400012938.hg.1	6.74	5.7	2.06	0.0002	0.0017	RASGEF1B	RasGEF domain family member 1B	Multiple_Complex
TC0500007925.hg.1	9.15	7.8	2.55	4.45e-07	7.94e-06	RASGRF2	Ras protein-specific guanine nucleotide-releasing factor 2	Multiple_Complex
TC1500009056.hg.1	11.3	13.11	-3.52	2.15e-15	1.89e-13	RASGRP1	RAS guanyl releasing protein 1 (calcium and DAG-regulated)	Multiple_Complex
TC1100011180.hg.1	7.4	6.28	2.18	6.98e-06	8.9e-05	RASGRP2	RAS guanyl releasing protein 2 (calcium and DAG-regulated)	Multiple_Complex
TC0100008607.hg.1	4.95	6.63	-3.21	5.05e-07	8.88e-06	RAVER2	ribonucleoprotein, PTB-binding 2	Multiple_Complex
TC2100006585.hg.1	8.26	6.4	3.64	9.16e-14	6.06e-12	RBM11	RNA binding motif protein 11	Multiple_Complex
TC1300009332.hg.1	6.72	5.68	2.05	9.39e-05	0.0008	RBM26	Transcript Identified by AceView, Entrez Gene ID(s) 64062	Unassigned
TC0300013828.hg.1	12.98	14.33	-2.55	1.39e-07	2.78e-06	RBM6	RNA binding motif protein 6	Multiple_Complex
TC0600011945.hg.1	4.76	9.08	-19.94	3.33e-20	6.06e-18	RCAN2	regulator of calcineurin 2	Coding
TC0100007370.hg.1	11.22	9.6	3.09	3.42e-07	6.3e-06	RCAN3	RCAN family member 3	Multiple_Complex
TC1300008894.hg.1	4.24	5.81	-2.97	1.63e-13	1.03e-11	RCBTB2	regulator of chromosome condensation (RCC1) and BTB (POZ) domain containing protein 2	Multiple_Complex
TC1100008101.hg.1	5.48	6.71	-2.35	1.94e-11	8.69e-10	RCE1; C11orf80	Ras converting CAAX endopeptidase 1; chromosome 11 open reading frame 80	Multiple_Complex
TC0800007957.hg.1	4.47	6.83	-5.13	6.07e-15	5e-13	RDH10	retinol dehydrogenase 10 (all-trans)	Multiple_Complex
TC1900012046.hg.1	7.23	8.49	-2.38	6.66e-07	1.14e-05	RDH13	retinol dehydrogenase 13 (all-trans/9-cis)	Multiple_Complex
TC1700010451.hg.1	5.42	7.15	-3.34	3.2e-07	5.93e-06	RDM1	RAD52 motif containing 1	Multiple_Complex
TC1100012262.hg.1	6.18	7.53	-2.56	7.08e-06	9e-05	RDX	radixin	Multiple_Complex
TC1400006723.hg.1	6.16	7.32	-2.23	2.62e-06	3.77e-05	REC8	REC8 meiotic recombination protein	Multiple_Complex
TC1200010105.hg.1	8.69	9.76	-2.1	0.0004	0.0026	RECQL	RecQ helicase-like	Multiple_Complex
TC0800009830.hg.1	5.9	7.61	-3.27	2.67e-07	5.01e-06	REEP4	receptor accessory protein 4	Multiple_Complex
TC0200013261.hg.1	7.51	8.55	-2.06	1.96e-08	4.8e-07	RETSAT	retinol saturase (all-trans-retinol 13,14-reductase)	Multiple_Complex
TC0600011535.hg.1	6.79	8.53	-3.35	1e-06	1.62e-05	RGL2	ral guanine nucleotide dissociation stimulator-like 2	Multiple_Complex
TC0200013351.hg.1	7.47	8.87	-2.64	9.18e-05	0.0008	RGPD1; RGPD2	RANBP2-like and GRIP domain containing 1; RANBP2-like and GRIP domain containing 2	Multiple_Complex
TC0200016484.hg.1	8.47	10.09	-3.06	8.12e-06	0.0001	RGPD2; RGPD1	RANBP2-like and GRIP domain containing 2; RANBP2-like and GRIP domain containing 1	Multiple_Complex
TC0100011012.hg.1	6.89	10.13	-9.44	1.07e-13	6.97e-12	RGS1	regulator of G-protein signaling 1	Multiple_Complex
TC1000012011.hg.1	16.28	14.02	4.79	2.64e-27	1.49e-24	RGS10	regulator of G-protein signaling 10	Multiple_Complex
TC0500009620.hg.1	10.86	9.84	2.03	0.0006	0.0042	RGS14	regulator of G-protein signaling 14	Multiple_Complex
TC0100011022.hg.1	7.74	10.15	-5.28	7.39e-14	4.94e-12	RGS2	regulator of G-protein signaling 2	Multiple_Complex
TC1700008635.hg.1	4.39	8.02	-12.37	2.4e-23	7.55e-21	RGS9	regulator of G-protein signaling 9	Multiple_Complex
TC1700011802.hg.1	10.53	14.11	-11.98	1.87e-27	1.09e-24	RHBDF2	rhomboid 5 homolog 2 (Drosophila)	Multiple_Complex
TC0100018463.hg.1	6.35	7.96	-3.05	7.43e-10	2.51e-08	RHOC	ras homolog family member C	Multiple_Complex
TC0400007311.hg.1	11.52	10.4	2.17	7.68e-07	1.3e-05	RHOH	ras homolog family member H	Multiple_Complex
TC1600006485.hg.1	8.62	10.51	-3.7	8.81e-07	1.45e-05	RHOT2	ras homolog family member T2	Multiple_Complex
TC0100018355.hg.1	5.16	6.55	-2.63	4.49e-11	1.9e-09	RHOU	ras homolog family member U	Multiple_Complex
TC0100018356.hg.1	4.67	6.05	-2.6	5.93e-15	4.94e-13	RHOU	ras homolog family member U	NonCoding
TC1200012270.hg.1	8.64	9.69	-2.07	2.29e-06	3.35e-05	RILPL2	Rab interacting lysosomal protein-like 2	Multiple_Complex
TC1400008014.hg.1	9.01	7.54	2.77	2.39e-09	7.13e-08	RIN3	Ras and Rab interactor 3	Multiple_Complex
TC0600006653.hg.1	8.53	9.61	-2.12	8.3e-09	2.19e-07	RIPK1	receptor (TNFRSF)-interacting serine-threonine kinase 1	Multiple_Complex
TC1600006904.hg.1	5.14	4.07	2.09	6.11e-08	1.33e-06	RMI2	RecQ mediated genome instability 2	Multiple_Complex
TC1100008328.hg.1	8.94	10.03	-2.13	3.19e-12	1.59e-10	RNF121	ring finger protein 121	Multiple_Complex
TC1800009223.hg.1	9.21	8.01	2.3	1.47e-09	4.62e-08	RNF138	ring finger protein 138, E3 ubiquitin protein ligase	Multiple_Complex
TC1700011787.hg.1	7.15	5.87	2.42	4.75e-08	1.08e-06	RNF157	ring finger protein 157	Multiple_Complex
TC0800011249.hg.1	8.93	11.48	-5.83	3.73e-20	6.67e-18	RNF19A	ring finger protein 19A, RBR E3 ubiquitin protein ligase	Multiple_Complex
TC1700009123.hg.1	8.24	10.14	-3.71	9.48e-10	3.1e-08	RNF213	ring finger protein 213	Multiple_Complex
TC0300011628.hg.1	5.42	3.72	3.24	1.02e-14	7.95e-13	ROBO1	roundabout guidance receptor 1	Multiple_Complex
TC0200011745.hg.1	7.12	8.44	-2.51	1.64e-05	0.0002	ROCK2	Rho-associated, coiled-coil containing protein kinase 2	Multiple_Complex
TC1500009641.hg.1	13.9	15.01	-2.16	3.48e-08	8.14e-07	RORA	RAR-related orphan receptor A	Multiple_Complex
TC1000012430.hg.1	6.39	7.75	-2.57	2.76e-06	3.94e-05	RP11-295P9.3; PRPF18	novel transcript; Transcript Identified by AceView, Entrez Gene ID(s) 8559; RP11-295P9.3 (from geneSymbol)	NonCoding
TC1700010363.hg.1	4.56	5.63	-2.11	6.98e-05	0.0006	RP11-466A19.5; MYO1D	Transcript Identified by AceView, Entrez Gene ID(s) 4642; novel transcript, sense intronic MYO1D	NonCoding
TC0600007800.hg.1	14.69	13.51	2.27	1.15e-15	1.05e-13	RPL10A	ribosomal protein L10a	Multiple_Complex
TC1600008888.hg.1	15.67	14.58	2.13	1.58e-10	6.04e-09	RPL13; SNORD68	ribosomal protein L13; small nucleolar RNA, C/D box 68	Multiple_Complex
TC0300013103.hg.1	10.12	9.04	2.12	0.0019	0.0103	RPL22L1	ribosomal protein L22-like 1	Multiple_Complex
TC1100013147.hg.1	16.41	15.08	2.51	7.22e-10	2.44e-08	RPS13; SNORD14B	ribosomal protein S13; small nucleolar RNA, C/D box 14B	Multiple_Complex
TC1900006532.hg.1	15.79	14.73	2.08	2.66e-08	6.36e-07	RPS15	ribosomal protein S15	Multiple_Complex
TC0100007469.hg.1	5.4	6.56	-2.22	9.88e-06	0.0001	RPS6KA1	ribosomal protein S6 kinase, 90kDa, polypeptide 1	Multiple_Complex
TC1400009973.hg.1	6.41	7.63	-2.33	1.87e-06	2.81e-05	RPS6KA5	ribosomal protein S6 kinase, 90kDa, polypeptide 5	Multiple_Complex
TC0600012544.hg.1	9.33	7.98	2.57	5.96e-07	1.03e-05	RRAGD	Ras-related GTP binding D	Multiple_Complex
TC2000008499.hg.1	8.73	10.2	-2.77	5.79e-10	2.01e-08	RRBP1	ribosome binding protein 1	Multiple_Complex
TC1600009420.hg.1	10.34	8.88	2.76	1.13e-10	4.48e-09	RSL1D1	ribosomal L1 domain containing 1	Multiple_Complex
TC0600013740.hg.1	5.17	6.25	-2.11	7.92e-09	2.1e-07	RSPH3	radial spoke 3 homolog (Chlamydomonas)	Multiple_Complex
TC2200008514.hg.1	11.57	10.43	2.21	8.92e-09	2.34e-07	RTCB	RNA 2,3-cyclic phosphate and 5-OH ligase	Multiple_Complex
TC1100007906.hg.1	9.92	11.21	-2.46	4.97e-09	1.38e-07	RTN3	reticulon 3	Multiple_Complex
TC0200011431.hg.1	4.51	6.08	-2.96	2.76e-11	1.22e-09	RTP5	receptor (chemosensory) transporter protein 5 (putative)	Coding
TC0300013763.hg.1	10.52	11.52	-2	6.07e-05	0.0006	RUBCN; MIR922	RUN domain and cysteine-rich domain containing, Beclin 1-interacting protein; microRNA 922	Multiple_Complex
TC2100008562.hg.1	13.22	14.5	-2.42	2.09e-11	9.3e-10	RUNX1	runt-related transcription factor 1	Multiple_Complex
TC0600008146.hg.1	9.24	10.94	-3.25	9.24e-07	1.52e-05	RUNX2	runt-related transcription factor 2	Multiple_Complex
TC0100013339.hg.1	13.42	14.45	-2.03	2.43e-10	8.98e-09	RUNX3	runt-related transcription factor 3	Multiple_Complex
TC0100015866.hg.1	9.24	10.6	-2.56	2.56e-06	3.69e-05	S100A4	S100 calcium binding protein A4	Multiple_Complex
TC2100008477.hg.1	8.85	4.33	23.01	7.49e-22	1.71e-19	S100B	S100 calcium binding protein B	Coding
TC1900009633.hg.1	4.52	8.84	-19.93	2.1e-23	6.83e-21	S1PR5	sphingosine-1-phosphate receptor 5	Coding
TC0800011601.hg.1	6.12	4.37	3.35	2.07e-09	6.35e-08	SAMD12	sterile alpha motif domain containing 12	Multiple_Complex
TC0600013160.hg.1	9.56	12.01	-5.48	3.63e-18	4.6e-16	SAMD3	sterile alpha motif domain containing 3	Multiple_Complex
TC2100007599.hg.1	11.11	13.93	-7.09	1.07e-15	9.84e-14	SAMSN1	SAM domain, SH3 domain and nuclear localization signals 1	Multiple_Complex
TC0200014192.hg.1	11.42	12.68	-2.38	2.63e-08	6.3e-07	SAP130	Sin3A associated protein 130kDa	Multiple_Complex
TC0400009330.hg.1	7.48	8.74	-2.39	1.81e-10	6.88e-09	SAP30	Sin3A associated protein 30kDa	Multiple_Complex
TC0X00006715.hg.1	9.7	6.34	10.28	1.85e-21	4.06e-19	SCML1	sex comb on midleg-like 1 (Drosophila)	Multiple_Complex
TC0400012437.hg.1	3.8	4.81	-2.01	9.85e-07	1.6e-05	SCRG1	stimulator of chondrogenesis 1	Coding
TC0700010619.hg.1	8.13	5.66	5.54	4.95e-10	1.74e-08	SCRN1	secernin 1	Multiple_Complex
TC0700008430.hg.1	10.87	9.83	2.06	4.05e-05	0.0004	SDHAF3	succinate dehydrogenase complex assembly factor 3	Multiple_Complex
TC1700011653.hg.1	10.59	5.26	40.32	3.61e-25	1.52e-22	SDK2	sidekick cell adhesion molecule 2	Multiple_Complex
TC2200009252.hg.1	6.85	5.71	2.2	1.39e-07	2.79e-06	SEC14L2	SEC14-like lipid binding 2	Multiple_Complex
TC1000008045.hg.1	7.65	8.69	-2.04	6.32e-05	0.0006	SEC24C	SEC24 homolog C, COPII coat complex component	Multiple_Complex
TC0400011695.hg.1	9.6	11.12	-2.86	2.37e-13	1.44e-11	SEC24D	SEC24 homolog D, COPII coat complex component	Multiple_Complex
TC1000012586.hg.1	7.93	9.26	-2.51	0.0001	0.0009	SEC31B	SEC31 homolog B, COPII coat complex component	Multiple_Complex
TC0300008713.hg.1	5.89	7.66	-3.4	2.96e-09	8.62e-08	SEC61A1	Sec61 translocon alpha 1 subunit	Multiple_Complex
TC1000006796.hg.1	5.99	7.33	-2.55	1.75e-07	3.42e-06	SEC61A2	Sec61 translocon alpha 2 subunit	Multiple_Complex
TC0100016359.hg.1	15.33	13.13	4.62	5.29e-14	3.59e-12	SELL	selectin L	Multiple_Complex
TC0500011260.hg.1	8.96	7.41	2.92	3.64e-11	1.57e-09	SERINC5	serine incorporator 5	Multiple_Complex
TC0600014220.hg.1	11.39	12.58	-2.29	0.0074	0.0296	SERPINB9	serpin peptidase inhibitor, clade B (ovalbumin), member 9	Multiple_Complex
TC0600012801.hg.1	6.79	7.82	-2.05	0.0024	0.0121	SESN1	sestrin 1	Multiple_Complex
TC1100012020.hg.1	6.3	7.64	-2.54	0.005	0.0218	SESN3	Transcript Identified by AceView, Entrez Gene ID(s) 143686	Unassigned
TC1800007186.hg.1	5.12	8.87	-13.48	7.51e-24	2.56e-21	SETBP1	SET binding protein 1	Multiple_Complex
TC1000008668.hg.1	8.92	10.14	-2.32	3.28e-06	4.58e-05	SFXN3	sideroflexin 3	Multiple_Complex
TC0600013231.hg.1	7.43	5.92	2.84	1.4e-06	2.17e-05	SGK1	serum/glucocorticoid regulated kinase 1	Multiple_Complex
TC0800009511.hg.1	6.35	4.52	3.57	1.13e-17	1.35e-15	SGK223	homolog of rat pragma of Rnd2; Tyrosine-protein kinase SgK223 [Source:UniProtKB/Swiss-Prot;Acc:Q86YV5]	Coding
TC0200010897.hg.1	6.14	7.74	-3.04	1.85e-08	4.54e-07	SGPP2	sphingosine-1-phosphate phosphatase 2	Multiple_Complex
TC1700006547.hg.1	10.4	11.64	-2.36	0.0003	0.0021	SGSM2	small G protein signaling modulator 2	Multiple_Complex
TC1200008873.hg.1	5.69	6.76	-2.1	0.0004	0.0029	SH2B3	SH2B adaptor protein 3	Multiple_Complex
TC0X00008344.hg.1	9.76	11.78	-4.05	2.62e-14	1.88e-12	SH2D1A	SH2 domain containing 1A	Multiple_Complex
TC0100016024.hg.1	8.9	12.32	-10.68	7.62e-31	6.3e-28	SH2D2A	SH2 domain containing 2A	Multiple_Complex
TC0600008622.hg.1	5.73	4.52	2.32	4.58e-10	1.64e-08	SH3BGRL2	SH3 domain binding glutamate-rich protein like 2	Multiple_Complex
TC0400006578.hg.1	6.04	7.4	-2.56	1.42e-06	2.2e-05	SH3BP2	SH3-domain binding protein 2	Multiple_Complex
TC0X00009205.hg.1	11.34	12.86	-2.87	1.25e-14	9.66e-13	SH3KBP1	SH3-domain kinase binding protein 1	Multiple_Complex
TC1100009168.hg.1	8.54	10.08	-2.91	2e-10	7.55e-09	SIDT2	SID1 transmembrane family, member 2	Multiple_Complex
TC1100012424.hg.1	8.45	9.59	-2.2	3.37e-09	9.72e-08	SIK3	SIK family kinase 3	Multiple_Complex
TC2000009971.hg.1	7.34	5.24	4.27	6.97e-15	5.66e-13	SIRPG	signal-regulatory protein gamma	Multiple_Complex
TC2000009013.hg.1	6.83	8.85	-4.07	1.75e-13	1.09e-11	SLA2	Src-like-adaptor 2	Coding
TC1300007565.hg.1	11.14	10.11	2.04	2.13e-06	3.13e-05	SLAIN1	SLAIN motif family member 1	Multiple_Complex
TC0100016138.hg.1	7.68	9.72	-4.12	8.11e-10	2.7e-08	SLAMF1	signaling lymphocytic activation molecule family member 1	Multiple_Complex
TC0100010303.hg.1	5.84	9.38	-11.6	1.19e-14	9.22e-13	SLAMF6	Memczak2013 ANTISENSE, coding, INTERNAL, intronic best transcript NM_052931	NonCoding
TC0100016135.hg.1	10.05	12.25	-4.59	1.91e-16	1.9e-14	SLAMF6	SLAM family member 6	Coding
TC0100010310.hg.1	7.59	11.34	-13.5	7.95e-36	1.22e-32	SLAMF7	SLAM family member 7	Multiple_Complex
TC1200010686.hg.1	7.4	8.43	-2.04	0.0073	0.0292	SLC11A2	solute carrier family 11 (proton-coupled divalent metal ion transporter), member 2	Multiple_Complex
TC1100011014.hg.1	6.16	4.47	3.24	4.61e-13	2.67e-11	SLC15A3	solute carrier family 15 (oligopeptide transporter), member 3	Multiple_Complex
TC1200012417.hg.1	7.54	10.17	-6.2	6.66e-21	1.32e-18	SLC15A4	solute carrier family 15 (oligopeptide transporter), member 4	Multiple_Complex
TC0600009143.hg.1	6.25	4.87	2.6	1.19e-12	6.44e-11	SLC16A10	solute carrier family 16 (aromatic amino acid transporter), member 10	Multiple_Complex
TC0100015234.hg.1	5.74	6.84	-2.15	9.58e-07	1.57e-05	SLC16A4	solute carrier family 16, member 4	Multiple_Complex
TC2000008037.hg.1	6.11	7.13	-2.02	4.76e-05	0.0005	SLC17A9	solute carrier family 17 (vesicular nucleotide transporter), member 9	Multiple_Complex
TC0200007821.hg.1	5.87	7.47	-3.02	4.58e-11	1.93e-09	SLC1A4	solute carrier family 1 (glutamate/neutral amino acid transporter), member 4	Multiple_Complex
TC1900011004.hg.1	6.75	8.44	-3.22	3.37e-15	2.89e-13	SLC1A5	solute carrier family 1 (neutral amino acid transporter), member 5	Multiple_Complex
TC0200008930.hg.1	6.69	8.13	-2.71	2.37e-09	7.08e-08	SLC20A1	solute carrier family 20 (phosphate transporter), member 1	Multiple_Complex
TC1400008714.hg.1	8.78	7.35	2.69	1.38e-16	1.4e-14	SLC22A17	solute carrier family 22, member 17	Multiple_Complex
TSUnmapped00000762.hg.1	5.66	7.6	-3.83	8.63e-10	2.86e-08	SLC25A26	solute carrier family 25 (S-adenosylmethionine carrier), member 26	Coding
TSUnmapped00000635.hg.1	8.22	9.26	-2.05	1.28e-06	2.02e-05	SLC25A26	solute carrier family 25 (S-adenosylmethionine carrier), member 26	Coding
TC1500007196.hg.1	3.96	5.63	-3.19	1.01e-05	0.0001	SLC27A2	solute carrier family 27 (fatty acid transporter), member 2	Multiple_Complex
TC1200009796.hg.1	13.45	14.84	-2.61	3.26e-06	4.56e-05	SLC2A14	solute carrier family 2 (facilitated glucose transporter), member 14	Multiple_Complex
TC1200009800.hg.1	12.85	14.36	-2.83	8.03e-06	0.0001	SLC2A3	solute carrier family 2 (facilitated glucose transporter), member 3	Multiple_Complex
TC1700011059.hg.1	10.18	11.45	-2.41	0.0002	0.0014	SLC35B1	solute carrier family 35, member B1	Multiple_Complex
TC1900011901.hg.1	8.86	9.96	-2.13	6.36e-06	8.22e-05	SLC35E1	solute carrier family 35, member E1	Multiple_Complex
TC0300008919.hg.1	4.74	6.42	-3.19	2.12e-08	5.17e-07	SLC35G2	solute carrier family 35, member G2	Multiple_Complex
TC0400007799.hg.1	4.31	5.61	-2.46	5.88e-09	1.6e-07	SLC4A4	solute carrier family 4 (sodium bicarbonate cotransporter), member 4	Multiple_Complex
TC0300010561.hg.1	9.77	11.23	-2.76	3.44e-11	1.48e-09	SLC4A7	solute carrier family 4, sodium bicarbonate cotransporter, member 7	Multiple_Complex
TC0300013919.hg.1	7.65	9.14	-2.81	1.32e-07	2.66e-06	SLC51A	solute carrier family 51, alpha subunit	NonCoding
TC2100008496.hg.1	11.38	9.83	2.94	3.52e-13	2.08e-11	SLC5A3; MRPS6	solute carrier family 5 (sodium/myo-inositol cotransporter), member 3; mitochondrial ribosomal protein S6	Multiple_Complex
TC0300006677.hg.1	9.72	11.42	-3.24	9.3e-13	5.13e-11	SLC6A6	solute carrier family 6 (neurotransmitter transporter), member 6	Multiple_Complex
TC1600011186.hg.1	5.79	9.42	-12.45	2.33e-12	1.2e-10	SLC7A5	solute carrier family 7 (amino acid transporter light chain, L system), member 5	Multiple_Complex
TC1400008705.hg.1	6.85	3.81	8.24	6.34e-22	1.48e-19	SLC7A8	solute carrier family 7 (amino acid transporter light chain, L system), member 8	Multiple_Complex
TC1200011993.hg.1	10.85	9.68	2.26	1.13e-06	1.81e-05	SLC8B1	solute carrier family 8 (sodium/lithium/calcium exchanger), member B1	Multiple_Complex
TC0100013417.hg.1	6.73	7.78	-2.06	3.87e-05	0.0004	SLC9A1	solute carrier family 9, subfamily A (NHE1, cation proton antiporter 1), member 1	Multiple_Complex
TC0X00009541.hg.1	3.74	5.29	-2.94	1.1e-09	3.51e-08	SLC9A7	solute carrier family 9, subfamily A (NHE7, cation proton antiporter 7), member 7	Multiple_Complex
TC1500008360.hg.1	8.01	9.02	-2	8.09e-05	0.0007	SLCO3A1	solute carrier organic anion transporter family, member 3A1	Multiple_Complex
TC0500008107.hg.1	6.62	8.11	-2.82	4.08e-14	2.85e-12	SLF1	SMC5-SMC6 complex localization factor 1	Multiple_Complex
TC1700010420.hg.1	8.03	10.22	-4.54	3.28e-15	2.83e-13	SLFN11	schlafen family member 11	Multiple_Complex
TC1700012387.hg.1	7.02	9.42	-5.28	1.99e-18	2.67e-16	SLFN12L	schlafen family member 12-like	Multiple_Complex
TC1700010426.hg.1	8.99	10.83	-3.59	1.38e-06	2.14e-05	SLFN13	schlafen family member 13	Multiple_Complex
TC1600007449.hg.1	9.23	10.68	-2.74	1.42e-10	5.5e-09	SLX1A; SLX1B; SLX1A-SULT1A3; SLX1B-SULT1A4; SULT1A3	SLX1 homolog A, structure-specific endonuclease subunit; SLX1 homolog B, structure-specific endonuclease subunit; SLX1A-SULT1A3 readthrough (NMD candidate); SLX1B-SULT1A4 readthrough (NMD candidate); sulfotransferase family 1A member 3	Multiple_Complex
TC1600011373.hg.1	7.49	8.82	-2.51	2.57e-06	3.71e-05	SLX1A-SULT1A3	SLX1A-SULT1A3 readthrough (NMD candidate)	Multiple_Complex
TC1600009199.hg.1	7.32	8.51	-2.28	5.44e-07	9.47e-06	SLX4	SLX4 structure-specific endonuclease subunit	Multiple_Complex
TC0500013232.hg.1	8.58	9.81	-2.34	9.19e-08	1.92e-06	SMAD5	SMAD family member 5	Multiple_Complex
TC1800008650.hg.1	7.26	9.15	-3.71	1.83e-11	8.22e-10	SMAD7	SMAD family member 7	Multiple_Complex
TC1700011424.hg.1	10.05	11.09	-2.05	0.0006	0.0039	SMARCD2	SWI/SNF related, matrix associated, actin dependent regulator of chromatin, subfamily d, member 2	Multiple_Complex
TC0300009337.hg.1	7.99	9.85	-3.63	3.85e-10	1.4e-08	SMC4	structural maintenance of chromosomes 4	Multiple_Complex
TC0200016637.hg.1	5.57	6.92	-2.54	1.22e-05	0.0001	SMC6	structural maintenance of chromosomes 6	Multiple_Complex
TC2200009279.hg.1	13.44	11.61	3.55	4.24e-09	1.2e-07	SMDT1	single-pass membrane protein with aspartate-rich tail 1	Multiple_Complex
TC1600009620.hg.1	10.88	12.49	-3.05	2.05e-06	3.04e-05	SMG1	SMG1 phosphatidylinositol 3-kinase-related kinase	Multiple_Complex
TC1400010620.hg.1	9.8	8.61	2.28	1.79e-06	2.7e-05	SNAPC1	small nuclear RNA activating complex polypeptide 1	Multiple_Complex
TC0900011998.hg.1	12.59	11.08	2.86	1.19e-10	4.71e-09	SNORA17A; SNORA17B; SNHG7	small nucleolar RNA, H/ACA box 17A; small nucleolar RNA, H/ACA box 17B; small nucleolar RNA host gene 7	Multiple_Complex
TC1700007017.hg.1	14.07	13.01	2.08	1.69e-11	7.67e-10	SNORD49A; SNORD65; LRRC75A-AS1	small nucleolar RNA, C/D box 49A; small nucleolar RNA, C/D box 65; LRRC75A antisense RNA 1	Multiple_Complex
TC1500010698.hg.1	13.53	12.35	2.27	4.63e-11	1.95e-09	SNRPN; SNURF; SNORD107; PWARSN	small nuclear ribonucleoprotein polypeptide N; SNRPN upstream reading frame; small nucleolar RNA, C/D box 107; Prader Willi/Angelman region RNA, SNRPN neighbor	Multiple_Complex
TC1600010276.hg.1	4.96	5.98	-2.03	3.1e-06	4.38e-05	SNX20	sorting nexin 20	Multiple_Complex
TC0500008483.hg.1	4.84	6.23	-2.64	4.74e-10	1.68e-08	SNX24	sorting nexin 24	Multiple_Complex
TC2000009986.hg.1	9.65	10.72	-2.11	2.21e-08	5.39e-07	SNX5	sorting nexin 5	Multiple_Complex
TC2000008515.hg.1	6.16	7.17	-2	7.59e-05	0.0007	SNX5	Jeck2013 ALT_DONOR, coding, INTERNAL, intronic best transcript NM_152227	NonCoding
TC0600014196.hg.1	12.67	11.03	3.13	6.85e-08	1.47e-06	SNX9	sorting nexin 9	Multiple_Complex
TC1200008474.hg.1	4.95	6.29	-2.55	1.06e-06	1.72e-05	SOCS2	suppressor of cytokine signaling 2	Coding
TC0600013119.hg.1	5.78	6.93	-2.21	1.02e-08	2.66e-07	SOGA3; KIAA0408	SOGA family member 3; KIAA0408	Multiple_Complex
TC0200012307.hg.1	8.85	10.34	-2.81	5.42e-08	1.21e-06	SOS1	SOS Ras/Rac guanine nucleotide exchange factor 1	Multiple_Complex
TC0200011020.hg.1	10.1	12.27	-4.51	5.88e-13	3.35e-11	SP140	SP140 nuclear body protein	Multiple_Complex
TC0100014127.hg.1	6.74	5.34	2.64	6.9e-11	2.83e-09	SPATA6	spermatogenesis associated 6	Multiple_Complex
TC1700007204.hg.1	4.56	5.8	-2.37	7.29e-08	1.56e-06	SPECC1	sperm antigen with calponin homology and coiled-coil domains 1	Multiple_Complex
TC2200009234.hg.1	9.64	8.42	2.34	2.57e-06	3.71e-05	SPECC1L-ADORA2A	SPECC1L-ADORA2A readthrough (NMD candidate)	Multiple_Complex
TC1300008614.hg.1	10.12	7.62	5.67	1.77e-12	9.41e-11	SPG20	spastic paraplegia 20 (Troyer syndrome)	Multiple_Complex
TC0800007529.hg.1	7.72	9.2	-2.79	7.46e-12	3.53e-10	SPIDR	scaffolding protein involved in DNA repair	Multiple_Complex
TC0400010780.hg.1	7.05	5.17	3.67	3.16e-16	3.04e-14	SPINK2	serine peptidase inhibitor, Kazal type 2 (acrosin-trypsin inhibitor)	Multiple_Complex
TC1900011725.hg.1	9.38	6.54	7.18	2.59e-18	3.35e-16	SPINT2	serine peptidase inhibitor, Kunitz type, 2	Multiple_Complex
TC1600009935.hg.1	9.31	11.63	-5.02	3.73e-12	1.84e-10	SPN	Memczak2013 ANTISENSE, CDS, coding, INTERNAL best transcript NM_003123	NonCoding
TC0200009487.hg.1	6.56	7.7	-2.21	1.28e-06	2.02e-05	SPOPL	speckle-type POZ protein-like	Multiple_Complex
TC0400008091.hg.1	7.49	6.25	2.36	0.0017	0.0094	SPP1	secreted phosphoprotein 1	Multiple_Complex
TC0400008628.hg.1	5.97	4.73	2.36	6.5e-08	1.41e-06	SPRY1	sprouty RTK signaling antagonist 1	Multiple_Complex
TC0200007609.hg.1	12.59	11.37	2.33	1.61e-09	5.03e-08	SPTBN1	spectrin, beta, non-erythrocytic 1	Multiple_Complex
TC1700009949.hg.1	11.64	9.88	3.38	3.04e-11	1.32e-09	SREBF1	sterol regulatory element binding transcription factor 1	Multiple_Complex
TC0100011364.hg.1	7.69	9.6	-3.77	5.93e-17	6.32e-15	SRGAP2	SLIT-ROBO Rho GTPase activating protein 2	Multiple_Complex
TC0100015572.hg.1	7.33	9.49	-4.47	1.81e-14	1.33e-12	SRGAP2B	SLIT-ROBO Rho GTPase activating protein 2B	Multiple_Complex
TC0100009658.hg.1	8.18	10.12	-3.83	3.32e-12	1.65e-10	SRGAP2C	SLIT-ROBO Rho GTPase activating protein 2C	Multiple_Complex
TC1000010870.hg.1	16	17.06	-2.08	5.19e-16	4.93e-14	SRGN	Memczak2013 ANTISENSE, coding, INTERNAL, UTR3 best transcript NM_002727	NonCoding
TC1700011820.hg.1	10.94	12.2	-2.4	0.0003	0.0021	SRSF2; MIR636	serine/arginine-rich splicing factor 2; microRNA 636	Multiple_Complex
TC1200012841.hg.1	6.91	8.19	-2.43	1.25e-06	1.98e-05	SSH1	slingshot protein phosphatase 1	Multiple_Complex
TC0100008061.hg.1	7.33	8.47	-2.2	1.85e-06	2.78e-05	SZT2	seizure threshold 2 homolog (mouse)	Multiple_Complex
TC1500010899.hg.1	9.51	8.25	2.4	3.56e-07	6.52e-06	ST20-MTHFS	ST20-MTHFS readthrough	Multiple_Complex
TC1100009453.hg.1	3.86	5.15	-2.45	1.07e-06	1.73e-05	ST3GAL4	ST3 beta-galactoside alpha-2,3-sialyltransferase 4	Multiple_Complex
TC0700008882.hg.1	5.14	6.44	-2.46	6.39e-10	2.2e-08	ST7; ST7-OT4; ST7-OT3; MIR6132	suppression of tumorigenicity 7; ST7 overlapping transcript 4; ST7 overlapping transcript 3; microRNA 6132	Multiple_Complex
TC1200012775.hg.1	5	7.16	-4.47	9.31e-13	5.13e-11	ST8SIA1	ST8 alpha-N-acetyl-neuraminide alpha-2,8-sialyltransferase 1	Multiple_Complex
TC0500011579.hg.1	5.57	6.66	-2.14	9.49e-06	0.0001	ST8SIA4	ST8 alpha-N-acetyl-neuraminide alpha-2,8-sialyltransferase 4	Multiple_Complex
TC1000009927.hg.1	4.64	6.14	-2.83	6.33e-08	1.37e-06	ST8SIA6	ST8 alpha-N-acetyl-neuraminide alpha-2,8-sialyltransferase 6	Multiple_Complex
TC0300012534.hg.1	7.84	8.91	-2.09	1.13e-05	0.0001	STAG1	stromal antigen 1	Multiple_Complex
TC1000006907.hg.1	6.75	7.99	-2.36	9.32e-05	0.0008	STAM	Memczak2013 ALT_ACCEPTOR, ALT_DONOR, INTERNAL, intronic, ncRNA best transcript NR_037774	NonCoding
TC0400007713.hg.1	4.61	3.59	2.02	2.2e-05	0.0002	STAP1	signal transducing adaptor family member 1	Coding
TC1900009333.hg.1	4.85	3.78	2.1	2.31e-10	8.55e-09	STAP2	signal transducing adaptor family member 2	Multiple_Complex
TC1500007038.hg.1	6.62	8.33	-3.28	2.09e-12	1.1e-10	STARD9	StAR-related lipid transfer domain containing 9	Multiple_Complex
TC0200015242.hg.1	14.99	13.81	2.26	8.4e-07	1.4e-05	STAT1	signal transducer and activator of transcription 1	Multiple_Complex
TC0200015246.hg.1	10.52	11.57	-2.07	0.0005	0.0036	STAT4	signal transducer and activator of transcription 4	Multiple_Complex
TC0500012818.hg.1	13.74	14.78	-2.06	9.45e-06	0.0001	STK10	serine/threonine kinase 10	Multiple_Complex
TC0800011216.hg.1	5.97	7.45	-2.79	1.19e-06	1.89e-05	STK3	serine/threonine kinase 3	Multiple_Complex
TC0200010806.hg.1	4.9	6.07	-2.25	5.61e-08	1.24e-06	STK36	serine/threonine kinase 36	Multiple_Complex
TC0200014834.hg.1	10.8	12.01	-2.32	9.72e-13	5.33e-11	STK39	serine threonine kinase 39	Multiple_Complex
TC0100013369.hg.1	10.6	9.23	2.58	2.9e-08	6.87e-07	STMN1; MIR3917	stathmin 1; microRNA 3917	Multiple_Complex
TC0900011404.hg.1	7.97	10.55	-5.98	2.55e-16	2.49e-14	STOM	stomatin	Multiple_Complex
TC1100013110.hg.1	12.47	13.71	-2.35	7.82e-12	3.69e-10	STT3A	STT3A, subunit of the oligosaccharyltransferase complex (catalytic)	Multiple_Complex
TC0600009710.hg.1	8.59	9.89	-2.47	2.01e-09	6.17e-08	STX11	syntaxin 11	Coding
TC0600011927.hg.1	11.67	10.59	2.11	1.14e-06	1.82e-05	SUPT3H	SPT3 homolog, SAGA and STAGA complex component	Multiple_Complex
TC0900011842.hg.1	6.53	7.87	-2.53	1e-09	3.26e-08	SURF4	surfeit 4	Multiple_Complex
TSUnmapped00000489.hg.1	8.34	9.48	-2.2	1.52e-08	3.81e-07	SURF4	surfeit 4	NonCoding
TC0900011220.hg.1	6.21	7.37	-2.24	1.3e-06	2.04e-05	SUSD1	sushi domain containing 1	Multiple_Complex
TC1100010349.hg.1	11.53	10.32	2.31	6.38e-09	1.72e-07	SVIP	small VCP/p97-interacting protein	Multiple_Complex
TC0100014772.hg.1	6.32	5.25	2.11	3.48e-06	4.83e-05	SYDE2	synapse defective 1, Rho GTPase, homolog 2 (C. elegans)	Multiple_Complex
TC0600013588.hg.1	5.03	7.36	-5.05	4.61e-14	3.19e-12	SYNE1	spectrin repeat containing, nuclear envelope 1	Multiple_Complex
TC1400007430.hg.1	10.63	11.99	-2.56	8.17e-07	1.37e-05	SYNE2	spectrin repeat containing, nuclear envelope 2	Multiple_Complex
TC1500010796.hg.1	4.31	6.94	-6.19	9.55e-12	4.45e-10	SYNM	synemin, intermediate filament protein	Multiple_Complex
TC0700012180.hg.1	7.29	6.12	2.25	2.32e-09	6.97e-08	SYPL1	synaptophysin-like 1	Multiple_Complex
TC2000009923.hg.1	9.93	8.65	2.44	4.14e-07	7.44e-06	SYS1	Sys1 golgi trafficking protein	Multiple_Complex
TC0100010140.hg.1	8.62	10.37	-3.37	1.62e-18	2.23e-16	SYT11	synaptotagmin XI	Coding
TC0600010021.hg.1	9.51	11.11	-3.03	4.88e-12	2.35e-10	SYTL3	synaptotagmin-like 3	Multiple_Complex
TC1100013186.hg.1	10.01	11.53	-2.88	2.17e-09	6.61e-08	SYVN1	synovial apoptosis inhibitor 1, synoviolin	Multiple_Complex
TC2000009602.hg.1	4.93	6.21	-2.43	1.72e-09	5.32e-08	ZBP1	Z-DNA binding protein 1	Multiple_Complex
TC0800008062.hg.1	7.06	5.91	2.22	0.0003	0.0023	ZBTB10	zinc finger and BTB domain containing 10	Coding
TC0100012211.hg.1	6.86	5.72	2.21	1.72e-10	6.54e-09	ZBTB18	zinc finger and BTB domain containing 18	Multiple_Complex
TC0300012048.hg.1	12.17	13.25	-2.11	0.0013	0.0074	ZBTB20; MIR568	zinc finger and BTB domain containing 20; microRNA 568	Multiple_Complex
TC0300008999.hg.1	8.81	12.02	-9.26	1.1e-22	2.95e-20	ZBTB38	zinc finger and BTB domain containing 38	Multiple_Complex
TC0100010104.hg.1	6.8	7.93	-2.2	2.21e-09	6.7e-08	ZBTB7B	zinc finger and BTB domain containing 7B	Multiple_Complex
TC0X00009890.hg.1	10.49	9.36	2.19	1.85e-05	0.0002	ZC4H2	zinc finger, C4H2 domain containing	Multiple_Complex
TC0500013282.hg.1	4.1	5.16	-2.08	0.0059	0.0247	ZDHHC11	zinc finger, DHHC-type containing 11	Multiple_Complex
TC0600009980.hg.1	5.17	6.34	-2.24	5.61e-07	9.73e-06	ZDHHC14	zinc finger, DHHC-type containing 14	Multiple_Complex
TC0100007484.hg.1	9.03	10.36	-2.52	4.02e-10	1.45e-08	ZDHHC18	zinc finger, DHHC-type containing 18	Multiple_Complex
TC1000007199.hg.1	12.24	11.22	2.02	0.0146	0.0496	ZEB1	zinc finger E-box binding homeobox 1	Multiple_Complex
TC0200014512.hg.1	5.66	10.96	-39.61	2.12e-28	1.34e-25	ZEB2	zinc finger E-box binding homeobox 2	Multiple_Complex
TC1900009001.hg.1	7.54	6.09	2.73	0.0001	0.001	ZIK1	zinc finger protein interacting with K protein 1	Multiple_Complex
TC1900007447.hg.1	11.34	9.59	3.37	3.41e-13	2.03e-11	ZNF101	zinc finger protein 101	Multiple_Complex
TC1900009022.hg.1	5.73	4.1	3.09	4.41e-13	2.57e-11	ZNF135	zinc finger protein 135	Multiple_Complex
TC0200015739.hg.1	7.96	9.03	-2.11	9.95e-07	1.61e-05	ZNF142	zinc finger protein 142	Multiple_Complex
TC1600011562.hg.1	9.43	10.44	-2.01	1.7e-05	0.0002	ZNF19	zinc finger protein 19	Multiple_Complex
TC1900012025.hg.1	6.12	7.22	-2.15	2.29e-05	0.0002	ZNF28	zinc finger protein 28	Multiple_Complex
TC1000010452.hg.1	8.82	7.8	2.03	1.69e-07	3.33e-06	ZNF32	zinc finger protein 32	Multiple_Complex
TC2000009253.hg.1	8.65	9.94	-2.43	5.97e-08	1.31e-06	ZNF335	zinc finger protein 335	Multiple_Complex
TC1000007776.hg.1	4.41	6.24	-3.54	2.2e-13	1.35e-11	ZNF365	zinc finger protein 365	Multiple_Complex
TC1800009086.hg.1	4.9	3.89	2.02	4.22e-10	1.51e-08	ZNF516	zinc finger protein 516	Multiple_Complex
TC1800007440.hg.1	3.96	5.57	-3.05	5.85e-08	1.29e-06	ZNF532	zinc finger protein 532	Multiple_Complex
TC1900009729.hg.1	7.11	5.71	2.63	7.47e-10	2.52e-08	ZNF563	zinc finger protein 563	Multiple_Complex
TC1900012024.hg.1	6.5	7.63	-2.19	2.82e-06	4.02e-05	ZNF600	zinc finger protein 600	Multiple_Complex
TC1900011312.hg.1	13.21	14.75	-2.9	9.76e-13	5.34e-11	ZNF611	zinc finger protein 611	Multiple_Complex
TC1900011524.hg.1	5.96	4.63	2.51	1.79e-11	8.1e-10	ZNF667	zinc finger protein 667	Multiple_Complex
TC0100013384.hg.1	5.35	6.77	-2.67	5.44e-05	0.0005	ZNF683	zinc finger protein 683	Coding
TC0900008804.hg.1	8.45	9.88	-2.7	1.95e-12	1.03e-10	ZNF79	zinc finger protein 79	Multiple_Complex
TC0300012047.hg.1	6.88	9.75	-7.32	9.56e-16	8.8e-14	ZNF80	zinc finger protein 80	Coding
TC1900011793.hg.1	11.43	12.79	-2.56	6.55e-12	3.1e-10	ZNF808; RPL39P34	zinc finger protein 808; ribosomal protein L39 pseudogene 34	Multiple_Complex
TC2000007928.hg.1	7.12	8.36	-2.37	1.01e-09	3.27e-08	ZNF831	zinc finger protein 831	Coding
TC1900007061.hg.1	7.84	6.59	2.39	2.27e-06	3.33e-05	ZNF844	zinc finger protein 844	Coding
TC1600008427.hg.1	9.26	10.92	-3.14	4.12e-07	7.42e-06	ZNRF1	zinc and ring finger 1, E3 ubiquitin protein ligase	Multiple_Complex
TC2000007507.hg.1	8.74	7.37	2.59	7.09e-13	3.99e-11	ZSWIM1	zinc finger, SWIM-type containing 1	Multiple_Complex
TC1700009877.hg.1	9.85	8.58	2.41	3.01e-09	8.76e-08	ZSWIM7	zinc finger, SWIM-type containing 7	Multiple_Complex
TC1800006937.hg.1	7.79	6.3	2.82	1.34e-06	2.1e-05	TAF4B	TAF4b RNA polymerase II, TATA box binding protein (TBP)-associated factor, 105kDa	Multiple_Complex
TC1100009169.hg.1	4.8	6.05	-2.37	2.81e-08	6.69e-07	TAGLN	transgelin	Multiple_Complex
TC0200009806.hg.1	10.45	11.81	-2.57	1.27e-08	3.23e-07	TANK	TRAF family member-associated NFKB activator	Multiple_Complex
TC0400007128.hg.1	7.61	9.37	-3.37	8.9e-10	2.93e-08	TBC1D19	TBC1 domain family, member 19	Multiple_Complex
TC1600011329.hg.1	7.57	8.89	-2.51	9.64e-06	0.0001	TBC1D24	TBC1 domain family, member 24	Multiple_Complex
TC1500010128.hg.1	10.51	12.02	-2.84	4.55e-08	1.04e-06	TBC1D2B	TBC1 domain family, member 2B	Multiple_Complex
TC1300009271.hg.1	10.25	8.64	3.05	4.18e-11	1.78e-09	TBC1D4	TBC1 domain family, member 4	Multiple_Complex
TC1700009277.hg.1	7.81	9.87	-4.18	5.01e-08	1.13e-06	TBCD	tubulin folding cofactor D	Multiple_Complex
TC1200008003.hg.1	7.36	8.98	-3.07	2.84e-09	8.33e-08	TBK1	TANK-binding kinase 1	Multiple_Complex
TC1700008134.hg.1	4.79	5.9	-2.15	2.89e-06	4.1e-05	TBKBP1	TBK1 binding protein 1	Coding
TC1700008135.hg.1	4.92	6.11	-2.28	9e-15	7.09e-13	TBX21	T-box 21	Multiple_Complex
TC1900009297.hg.1	6.38	4.64	3.34	1.46e-14	1.1e-12	TBXA2R	thromboxane A2 receptor	Multiple_Complex
TC1400010777.hg.1	10.56	12.19	-3.1	7.67e-11	3.11e-09	TC2N	tandem C2 domains, nuclear	Multiple_Complex
TC0100013278.hg.1	11.12	7.34	13.75	1.22e-20	2.34e-18	TCEA3	transcription elongation factor A (SII), 3	Multiple_Complex
TC0X00011317.hg.1	8.7	7.57	2.19	7.22e-07	1.23e-05	TCEAL1	transcription elongation factor A (SII)-like 1	Multiple_Complex
TC0X00007965.hg.1	5.88	4.26	3.08	1.68e-14	1.25e-12	TCEAL2	transcription elongation factor A (SII)-like 2	Multiple_Complex
TC0X00011315.hg.1	8.6	7.42	2.27	5.83e-12	2.78e-10	TCEAL3	transcription elongation factor A (SII)-like 3	Coding
TC0X00010406.hg.1	7.99	6.87	2.18	4.38e-09	1.23e-07	TCEAL8	transcription elongation factor A (SII)-like 8	Multiple_Complex
TC1600011451.hg.1	10.53	11.59	-2.08	8.38e-06	0.0001	TCF25	transcription factor 25 (basic helix-loop-helix)	Multiple_Complex
TC0500008684.hg.1	11.03	9.31	3.29	6.14e-19	9.21e-17	TCF7	transcription factor 7 (T-cell specific, HMG-box)	Multiple_Complex
TC1200012704.hg.1	5.95	7.14	-2.29	1.42e-06	2.19e-05	TCHP	trichoplein, keratin filament binding	Multiple_Complex
TC1100013057.hg.1	10.95	12.63	-3.2	1.21e-13	7.79e-12	TCIRG1	T-cell, immune regulator 1, ATPase, H+ transporting, lysosomal V0 subunit A3	Multiple_Complex
TC1400008588.hg.1	8.9	10.23	-2.51	1.25e-07	2.52e-06	TEP1	telomerase-associated protein 1	Multiple_Complex
TC0900007085.hg.1	12.05	13.5	-2.72	4.43e-11	1.88e-09	TESK1; MIR4667	testis-specific kinase 1; microRNA 4667	Multiple_Complex
TC1200010850.hg.1	12.15	10.39	3.38	2.24e-12	1.17e-10	TESPA1	thymocyte expressed, positive selection associated 1	Multiple_Complex
TC0300013684.hg.1	6.51	7.72	-2.31	0.0004	0.0027	TFRC	transferrin receptor	Multiple_Complex
TC1900010743.hg.1	8.49	9.78	-2.44	1.36e-06	2.12e-05	TGFB1	transforming growth factor beta 1	Multiple_Complex
TC0900008202.hg.1	6.39	7.72	-2.51	5.13e-08	1.15e-06	TGFBR1	transforming growth factor, beta receptor 1	Multiple_Complex
TC0100014910.hg.1	8.56	13.16	-24.17	3.59e-33	4.06e-30	TGFBR3	transforming growth factor beta receptor III	Multiple_Complex
TC1500006925.hg.1	7.52	9.31	-3.45	0.0006	0.0041	THBS1	thrombospondin 1	Multiple_Complex
TC0100015817.hg.1	10.49	9.37	2.17	0.0003	0.0019	THEM4	thioesterase superfamily member 4	Multiple_Complex
TC0500009223.hg.1	7.65	6.52	2.18	6.59e-07	1.13e-05	THG1L	tRNA-histidine guanylyltransferase 1-like	Multiple_Complex
TC1700010230.hg.1	6.37	7.94	-2.97	5.51e-12	2.64e-10	TIAF1; MYO18A	TGFB1-induced anti-apoptotic factor 1; myosin XVIIIA	Multiple_Complex
TC0300008385.hg.1	6.73	11.19	-21.97	3.76e-22	9.49e-20	TIGIT	T-cell immunoreceptor with Ig and ITIM domains	Multiple_Complex
TC1900011840.hg.1	9.32	8.11	2.31	2.62e-06	3.77e-05	TIMM13	translocase of inner mitochondrial membrane 13 homolog (yeast)	Coding
TC1400009315.hg.1	10.02	8.72	2.46	8.26e-11	3.33e-09	TIMM9	translocase of inner mitochondrial membrane 9 homolog (yeast)	Multiple_Complex
TC0400009543.hg.1	4.72	6.33	-3.06	1.03e-09	3.31e-08	TLR3	toll-like receptor 3	Multiple_Complex
TC0400012922.hg.1	4.13	5.88	-3.37	1.36e-06	2.12e-05	TLR6	toll-like receptor 6	Multiple_Complex
TC1200011567.hg.1	4.05	5.76	-3.29	6.75e-09	1.81e-07	TMCC3; MIR7844	transmembrane and coiled-coil domain family 3; microRNA 7844	Multiple_Complex
TC1100007785.hg.1	10.94	12.26	-2.49	6.03e-05	0.0006	TMEM109	transmembrane protein 109	Multiple_Complex
TC0300013997.hg.1	6.47	7.7	-2.35	4.2e-10	1.51e-08	TMEM110	transmembrane protein 110	Multiple_Complex
TC0300013996.hg.1	4.84	6.28	-2.7	3.88e-09	1.11e-07	TMEM110-MUSTN1; TMEM110	TMEM110-MUSTN1 readthrough; transmembrane protein 110	Multiple_Complex
TC0600014068.hg.1	10.42	8.86	2.96	2.17e-08	5.29e-07	TMEM14C	transmembrane protein 14C	Multiple_Complex
TC0300012834.hg.1	7.77	8.84	-2.11	0.0012	0.0068	TMEM14EP	transmembrane protein 14E, pseudogene	Coding
TC0400007559.hg.1	8.62	9.77	-2.22	0.0001	0.001	TMEM165	transmembrane protein 165	Multiple_Complex
TC0500007761.hg.1	4.04	5.33	-2.44	8.93e-08	1.86e-06	TMEM171	transmembrane protein 171	Coding
TC0500012210.hg.1	9.78	11.17	-2.61	6.16e-06	8e-05	TMEM173	transmembrane protein 173	Multiple_Complex
TC0600010017.hg.1	7.5	8.82	-2.5	8.55e-16	7.93e-14	TMEM181	transmembrane protein 181	Multiple_Complex
TC2200008687.hg.1	5.57	7.17	-3.04	1.86e-05	0.0002	TMEM184B	transmembrane protein 184B	Multiple_Complex
TC0900010386.hg.1	8.88	10.89	-4.02	7.91e-13	4.42e-11	TMEM2	transmembrane protein 2	Multiple_Complex
TC0900010388.hg.1	4.9	6.44	-2.91	6.81e-06	8.72e-05	TMEM2	Transcript Identified by AceView, Entrez Gene ID(s) 23670	Unassigned
TC1600006550.hg.1	10.3	8.05	4.77	5.06e-17	5.43e-15	TMEM204	transmembrane protein 204	Coding
TC1700009750.hg.1	8.27	5.55	6.56	6e-28	3.68e-25	TMEM220	transmembrane protein 220	Multiple_Complex
TC1900009128.hg.1	11.58	12.83	-2.38	6.47e-05	0.0006	TMEM259	transmembrane protein 259	Multiple_Complex
TC0900009513.hg.1	11.14	9.69	2.73	4.22e-12	2.06e-10	TMEM261	transmembrane protein 261	Multiple_Complex
TC0900008318.hg.1	9.02	7.65	2.58	1.05e-06	1.7e-05	TMEM38B	transmembrane protein 38B	Multiple_Complex
TC0300012118.hg.1	8.32	9.42	-2.13	1.41e-05	0.0002	TMEM39A	transmembrane protein 39A	Multiple_Complex
TC0300013793.hg.1	9.21	10.32	-2.17	4.62e-10	1.65e-08	TMEM43	transmembrane protein 43	Multiple_Complex
TC1500010726.hg.1	4.69	5.69	-2	1.24e-05	0.0001	TMEM62	transmembrane protein 62	Multiple_Complex
TC1700007811.hg.1	6.97	5.95	2.02	2.43e-05	0.0003	TMEM99	transmembrane protein 99	Multiple_Complex
TC1900009330.hg.1	8.94	6.93	4.02	3.44e-19	5.43e-17	TMIGD2	transmembrane and immunoglobulin domain containing 2	Coding
TC0600009597.hg.1	14.97	16.8	-3.55	3.99e-14	2.8e-12	TNFAIP3	tumor necrosis factor, alpha-induced protein 3	Multiple_Complex
TC0800009872.hg.1	8.37	6.16	4.64	1.28e-10	5.01e-09	TNFRSF10D	tumor necrosis factor receptor superfamily, member 10d, decoy with truncated death domain	Coding
TC0100012452.hg.1	5.14	6.51	-2.59	4.89e-07	8.63e-06	TNFRSF18	tumor necrosis factor receptor superfamily, member 18	Coding
TC0100006881.hg.1	9.28	12.45	-8.99	1.69e-14	1.25e-12	TNFRSF1B; MIR4632; MIR7846	tumor necrosis factor receptor superfamily, member 1B; microRNA 4632; microRNA 7846	Multiple_Complex
TC0100012453.hg.1	5.74	8.31	-5.93	1.71e-13	1.07e-11	TNFRSF4	tumor necrosis factor receptor superfamily, member 4	Multiple_Complex
TC0100012734.hg.1	7.45	10.56	-8.65	2.33e-09	7.01e-08	TNFRSF9	tumor necrosis factor receptor superfamily, member 9	Coding
TC0300013146.hg.1	8.41	9.66	-2.38	5.51e-10	1.92e-08	TNFSF10	tumor necrosis factor (ligand) superfamily, member 10	Multiple_Complex
TC1900009442.hg.1	6.41	9.48	-8.42	1.22e-26	6.21e-24	TNFSF14	tumor necrosis factor (ligand) superfamily, member 14	Multiple_Complex
TC0300013108.hg.1	8.68	10.49	-3.5	6.02e-09	1.63e-07	TNIK	TRAF2 and NCK interacting kinase	Multiple_Complex
TC0400011735.hg.1	4.35	6.39	-4.1	5.96e-11	2.46e-09	TNIP3	TNFAIP3 interacting protein 3	Multiple_Complex
TC0300011172.hg.1	8.57	7.02	2.93	7.83e-10	2.62e-08	TNNC1	troponin C type 1 (slow)	Multiple_Complex
TC1600007262.hg.1	9.95	11.14	-2.27	0.0002	0.0019	TNRC6A	trinucleotide repeat containing 6A	Multiple_Complex
TC2200008112.hg.1	9.36	10.65	-2.44	1.13e-05	0.0001	TOP3B	topoisomerase (DNA) III beta	Multiple_Complex
TC0800010558.hg.1	5.28	9.83	-23.31	4.64e-36	8.3e-33	TOX	thymocyte selection-associated high mobility group box	Multiple_Complex
TC1100010639.hg.1	7.61	9.25	-3.1	1e-12	5.45e-11	TP53I11	tumor protein p53 inducible protein 11	Multiple_Complex
TC0800011150.hg.1	6.19	7.67	-2.79	4.47e-11	1.89e-09	TP53INP1	tumor protein p53 inducible nuclear protein 1	Multiple_Complex
TC0900009949.hg.1	6.56	8.18	-3.06	1.98e-05	0.0002	TPM2	tropomyosin 2 (beta)	Multiple_Complex
TC0300013914.hg.1	6.76	13.34	-95.74	8.34e-35	1.19e-31	TPRG1	tumor protein p63 regulated 1	NonCoding
TC0300013915.hg.1	3.86	8.83	-31.25	7.63e-31	6.3e-28	TPRG1	tumor protein p63 regulated 1	Multiple_Complex
TC0200016699.hg.1	9.66	6.42	9.48	1.77e-24	6.56e-22	TRABD2A	TraB domain containing 2A	Multiple_Complex
TC0600012871.hg.1	8.22	7.21	2.01	3.67e-06	5.06e-05	TRAF3IP2	TRAF3 interacting protein 2	Multiple_Complex
TC1100010551.hg.1	8.71	10	-2.44	1.11e-09	3.54e-08	TRAF6	TNF receptor-associated factor 6, E3 ubiquitin protein ligase	Multiple_Complex
TC0200015425.hg.1	8.97	10.03	-2.09	0.0002	0.0017	TRAK2	trafficking protein, kinesin binding 2	Multiple_Complex
TC2100007336.hg.1	8.5	9.69	-2.28	9.9e-08	2.05e-06	TRAPPC10	trafficking protein particle complex 10	Multiple_Complex
TC1900011658.hg.1	10.2	9.15	2.07	5.86e-06	7.67e-05	TRAPPC5	trafficking protein particle complex 5	Multiple_Complex
TC0300008290.hg.1	8.32	10.96	-6.22	7.48e-13	4.2e-11	TRAT1	T cell receptor associated transmembrane adaptor 1	Multiple_Complex
TC0600011823.hg.1	9.06	10.89	-3.54	1.46e-14	1.1e-12	TRERF1	transcriptional regulating factor 1	Multiple_Complex
TC0700013538.hg.1	9.39	12.87	-11.14	3.23e-20	5.93e-18	TRGJ1; TRGC2; TRGJ2; TRGV9; TRGC1; TRGJP; TRGJP2	T cell receptor gamma joining 1; T cell receptor gamma constant 2; T cell receptor gamma joining 2; T cell receptor gamma variable 9; T cell receptor gamma constant 1; T cell receptor gamma joining P; T cell receptor gamma joining P2	Multiple_Complex
TC1300007187.hg.1	9.2	10.71	-2.86	5.54e-11	2.31e-09	TRIM13; KCNRG	tripartite motif containing 13; potassium channel regulator	Multiple_Complex
TC0300014075.hg.1	9.07	10.46	-2.62	5.2e-05	0.0005	TRIM59	tripartite motif containing 59	Coding
TC2200007313.hg.1	4.51	5.6	-2.13	3.88e-05	0.0004	TRIOBP; NOL12	TRIO and F-actin binding protein; nucleolar protein 12	Multiple_Complex
TC2000008955.hg.1	9.37	10.68	-2.47	6.57e-10	2.25e-08	TRPC4AP	transient receptor potential cation channel, subfamily C, member 4 associated protein	Multiple_Complex
TC0300006627.hg.1	7.84	6.53	2.48	1.31e-07	2.64e-06	TSEN2	TSEN2 tRNA splicing endonuclease subunit	Multiple_Complex
TC2000007760.hg.1	7	5.46	2.91	2.57e-05	0.0003	TSHZ2	teashirt zinc finger homeobox 2	Coding
TC1900010334.hg.1	4.32	5.45	-2.19	2.99e-06	4.23e-05	TSHZ3	teashirt zinc finger homeobox 3	Multiple_Complex
TC1100007400.hg.1	4.87	5.92	-2.06	1.33e-08	3.35e-07	TSPAN18	tetraspanin 18	Multiple_Complex
TC0100015364.hg.1	5	6.67	-3.16	7.7e-10	2.59e-08	TSPAN2	tetraspanin 2	Multiple_Complex
TC0X00010329.hg.1	6.57	5.22	2.56	4.34e-09	1.22e-07	TSPAN6	tetraspanin 6	Multiple_Complex
TC0100018207.hg.1	7.32	8.99	-3.18	1.51e-05	0.0002	TSSK3	testis-specific serine kinase 3	Coding
TC1100007366.hg.1	10.61	11.81	-2.3	1.67e-05	0.0002	TTC17	tetratricopeptide repeat domain 17	Multiple_Complex
TC0200016746.hg.1	6.12	7.48	-2.56	8.92e-08	1.86e-06	TTC21B	tetratricopeptide repeat domain 21B	NonCoding
TC0100014275.hg.1	6.88	8.17	-2.46	1.05e-11	4.89e-10	TTC22	tetratricopeptide repeat domain 22	Multiple_Complex
TC1400007584.hg.1	9.72	7.71	4.01	5.97e-10	2.07e-08	TTC9	tetratricopeptide repeat domain 9	Coding
TC0300013787.hg.1	9.48	10.78	-2.47	1.15e-08	2.96e-07	TTLL3	tubulin tyrosine ligase-like family member 3	Multiple_Complex
TC2000007456.hg.1	7.29	8.33	-2.05	2.23e-05	0.0002	TTPAL	tocopherol (alpha) transfer protein-like	Multiple_Complex
TC0600014198.hg.1	11.31	12.35	-2.05	8.64e-05	0.0008	TULP4	tubby like protein 4	Multiple_Complex
TC0400010615.hg.1	9.4	6.75	6.31	3.12e-14	2.21e-12	TXK	TXK tyrosine kinase	Multiple_Complex
TC1600009412.hg.1	8.56	9.67	-2.16	1.4e-06	2.16e-05	TXNDC11	thioredoxin domain containing 11	Multiple_Complex
TC0100015598.hg.1	13.87	12.8	2.11	2.34e-08	5.65e-07	TXNIP	thioredoxin interacting protein	Multiple_Complex
TC0300014039.hg.1	5.74	3.55	4.54	2.14e-18	2.83e-16	TXNRD3	thioredoxin reductase 3	Multiple_Complex
TC1500009781.hg.1	5.28	6.36	-2.11	3.99e-06	5.44e-05	UBAP1L	ubiquitin associated protein 1 like	Multiple_Complex
TC2100007254.hg.1	14.19	13.16	2.04	3.48e-08	8.14e-07	UBASH3A	ubiquitin associated and SH3 domain containing A	Multiple_Complex
TC0300006827.hg.1	9.38	5.82	11.76	3.69e-25	1.52e-22	UBE2E2	ubiquitin conjugating enzyme E2E 2	Multiple_Complex
TC1500008135.hg.1	7.25	8.43	-2.26	1.31e-08	3.32e-07	UBE2Q2L	ubiquitin conjugating enzyme E2Q family member 2-like	Coding
TC0100016952.hg.1	9.6	8.6	2	0.0001	0.001	UBE2T	ubiquitin conjugating enzyme E2T	Multiple_Complex
TC0600008050.hg.1	9.09	10.36	-2.41	3.94e-09	1.12e-07	UBR2	ubiquitin protein ligase E3 component n-recognin 2	Multiple_Complex
TC0100018315.hg.1	6.9	8.26	-2.57	1.81e-11	8.16e-10	UCK2; MIR3658	uridine-cytidine kinase 2; microRNA 3658	Multiple_Complex
TC1100010271.hg.1	4.72	6.02	-2.46	2.96e-05	0.0003	UEVLD	UEV and lactate/malate dehyrogenase domains	Multiple_Complex
TC1200009457.hg.1	7.77	9.05	-2.41	4.76e-05	0.0005	ULK1	unc-51 like autophagy activating kinase 1	Multiple_Complex
TC0700007477.hg.1	9.1	10.39	-2.43	8.46e-11	3.4e-09	UPP1	uridine phosphorylase 1	Multiple_Complex
TC0100008152.hg.1	12.02	10.96	2.08	9.89e-06	0.0001	UQCRH	ubiquinol-cytochrome c reductase hinge protein	Multiple_Complex
TC0100013013.hg.1	7.92	6.86	2.09	2.07e-07	3.99e-06	UQCRHL	ubiquinol-cytochrome c reductase hinge protein like	Multiple_Complex
TC1900007313.hg.1	12.02	10.74	2.43	9.64e-11	3.84e-09	USE1	unconventional SNARE in the ER 1 homolog (S. cerevisiae)	Multiple_Complex
TC0300012027.hg.1	7.5	8.74	-2.35	1.98e-07	3.84e-06	USF3	upstream transcription factor family member 3	Multiple_Complex
TC1100012358.hg.1	6.56	8.88	-5	2.46e-12	1.26e-10	USP28	ubiquitin specific peptidase 28	Multiple_Complex
TC1100008557.hg.1	7.76	8.91	-2.23	8.48e-05	0.0008	USP35	ubiquitin specific peptidase 35	Multiple_Complex
TC1700011917.hg.1	12.44	13.47	-2.04	3.01e-08	7.1e-07	USP36	ubiquitin specific peptidase 36	Multiple_Complex
TC1200011588.hg.1	7.27	5.08	4.55	1.06e-17	1.27e-15	USP44	ubiquitin specific peptidase 44	Multiple_Complex
TC0400010688.hg.1	4.05	5.14	-2.13	4.08e-06	5.56e-05	USP46	ubiquitin specific peptidase 46	Multiple_Complex
TC0600009712.hg.1	9.83	11.65	-3.54	7.84e-14	5.22e-12	UTRN	utrophin	Multiple_Complex
TC0X00009582.hg.1	15.13	14.08	2.07	1.14e-11	5.25e-10	UXT	ubiquitously expressed prefoldin like chaperone	Multiple_Complex
TC0100009524.hg.1	3.72	5.3	-2.99	9.63e-13	5.3e-11	VANGL1	VANGL planar cell polarity protein 1	Multiple_Complex
TC0X00008001.hg.1	6.77	5.33	2.71	3.09e-13	1.85e-11	WBP5	WW domain binding protein 5	Coding
TC1000008056.hg.1	7.03	8.67	-3.11	1.04e-13	6.79e-12	VCL	vinculin	Multiple_Complex
TC0200007111.hg.1	10.27	9.23	2.07	1.57e-09	4.92e-08	WDR43; SNORD53	WD repeat domain 43; small nucleolar RNA, C/D box 53	Multiple_Complex
TC0100008897.hg.1	5.39	7.05	-3.16	1.38e-07	2.77e-06	WDR63	WD repeat domain 63	Multiple_Complex
TC1900007087.hg.1	7.53	8.55	-2.03	0.0008	0.005	WDR83	WD repeat domain 83	Multiple_Complex
TC1100006815.hg.1	4.67	7.74	-8.42	5.57e-24	1.93e-21	WEE1	WEE1 G2 checkpoint kinase	Multiple_Complex
TC0200014995.hg.1	13.81	14.88	-2.09	6.79e-09	1.82e-07	WIPF1	WAS/WASL interacting protein family, member 1	Multiple_Complex
TC1700011561.hg.1	5.92	7.61	-3.22	1.88e-10	7.11e-09	WIPI1	WD repeat domain, phosphoinositide interacting 1	Multiple_Complex
TC0900006481.hg.1	4.95	6.28	-2.52	3.01e-07	5.59e-06	VLDLR	very low density lipoprotein receptor	Multiple_Complex
TC1200006450.hg.1	10.65	12.6	-3.85	4.14e-08	9.55e-07	WNK1	WNK lysine deficient protein kinase 1	Multiple_Complex
TC1200006454.hg.1	7.48	8.83	-2.54	1.79e-07	3.48e-06	WNK1	Transcript Identified by AceView, Entrez Gene ID(s) 378465; 65125	Unassigned
TC0700011139.hg.1	7.77	8.78	-2.02	3.72e-07	6.77e-06	VOPP1	vesicular, overexpressed in cancer, prosurvival protein 1	Multiple_Complex
TC0800008352.hg.1	9.8	11.09	-2.44	3.52e-05	0.0004	VPS13B	vacuolar protein sorting 13 homolog B (yeast)	Multiple_Complex
TC1200012862.hg.1	8.35	9.57	-2.31	2.58e-05	0.0003	VPS33A	vacuolar protein sorting 33 homolog A (S. cerevisiae)	Multiple_Complex
TC1200012105.hg.1	9.62	10.82	-2.29	1.97e-09	6.05e-08	WSB2	WD repeat and SOCS box containing 2	Multiple_Complex
TC0X00008080.hg.1	10.84	8.3	5.79	3.57e-19	5.55e-17	VSIG1	V-set and immunoglobulin domain containing 1	Multiple_Complex
TC0X00006590.hg.1	7.92	9.05	-2.2	4.8e-09	1.33e-07	WWC3	WWC family member 3	Multiple_Complex
TC0100010532.hg.1	4.9	8.34	-10.83	3.89e-15	3.3e-13	XCL1	chemokine (C motif) ligand 1	Coding
TC0100016337.hg.1	5.08	9	-15.18	9.52e-19	1.4e-16	XCL2	chemokine (C motif) ligand 2	Coding
TC1200007906.hg.1	10.98	9.91	2.1	7.46e-06	9.44e-05	XRCC6BP1	XRCC6 binding protein 1	Multiple_Complex
TC0100013630.hg.1	6.55	8.09	-2.91	7.39e-05	0.0007	YARS	Transcript Identified by AceView, Entrez Gene ID(s) 8565	Unassigned
TC0100013629.hg.1	10.7	12.08	-2.59	1.98e-12	1.04e-10	YARS	tyrosyl-tRNA synthetase	Multiple_Complex
TC1200008134.hg.1	7.96	6.9	2.08	7.86e-05	0.0007	YEATS4	YEATS domain containing 4	Multiple_Complex
TC1900011689.hg.1	6.85	7.98	-2.18	1.05e-07	2.17e-06	YJEFN3	YjeF N-terminal domain containing 3	Coding
TC2200008103.hg.1	5.61	7.55	-3.85	9.23e-18	1.13e-15	YPEL1	yippee like 1	Multiple_Complex
TC1600009952.hg.1	9.57	10.83	-2.4	3.91e-09	1.11e-07	YPEL3	yippee like 3	Multiple_Complex
TC1100010903.hg.1	7.42	6.1	2.5	5.88e-05	0.0006	YPEL4	yippee like 4	Multiple_Complex
TC2200007114.hg.1	11.87	13.2	-2.51	2.27e-08	5.51e-07	YWHAH	tyrosine 3-monooxygenase/tryptophan 5-monooxygenase activation protein, eta	Multiple_Complex

## Sheet: NAvsTEM
ID	NA Avg (log2)	TEM Avg (log2)	Fold Change	P-val	FDR P-val	Gene Symbol	Description	Group
TC0700007178.hg.1	11.97	13.18	-2.32	4.87e-09	8.98e-08	SEPT7	septin 7	Multiple_Complex
TC1200009847.hg.1	5.06	10.87	-56.21	4.28e-25	7.17e-23	A2M	alpha-2-macroglobulin	Multiple_Complex
TC1600007022.hg.1	10.62	9.54	2.12	3.16e-05	0.0003	ABCC1	ATP binding cassette subfamily C member 1	Multiple_Complex
TC0600008087.hg.1	7.44	8.81	-2.59	0.0002	0.0014	ABCC10	ATP binding cassette subfamily C member 10	Multiple_Complex
TC0400008902.hg.1	11.13	9.99	2.19	0.0001	0.0008	ABCE1	ATP binding cassette subfamily E member 1	Multiple_Complex
TC1900009192.hg.1	7.75	8.92	-2.26	3.48e-05	0.0003	ABHD17A	abhydrolase domain containing 17A	Multiple_Complex
TC1500008245.hg.1	8.07	9.42	-2.54	5.07e-13	1.7e-11	ABHD2	abhydrolase domain containing 2	Multiple_Complex
TC1700008194.hg.1	7.16	8.41	-2.36	1.47e-07	2.11e-06	ABI3	ABI family, member 3	Multiple_Complex
TC1000011904.hg.1	16.43	15.06	2.58	6.11e-08	9.28e-07	ABLIM1	actin binding LIM protein 1	Multiple_Complex
TC1700012324.hg.1	8.02	9.35	-2.52	3.38e-07	4.48e-06	ABR	active BCR-related	Multiple_Complex
TC0100018540.hg.1	10.72	9.67	2.07	6.06e-08	9.23e-07	ACBD6	acyl-CoA binding domain containing 6	Multiple_Complex
TC0400012621.hg.1	4.23	5.39	-2.24	6.11e-06	5.98e-05	ACSL1	acyl-CoA synthetase long-chain family member 1	Multiple_Complex
TC1000008926.hg.1	9.41	11.09	-3.2	4.56e-13	1.54e-11	ACSL5	acyl-CoA synthetase long-chain family member 5	Multiple_Complex
TC1600011362.hg.1	7.31	5.52	3.45	3.89e-09	7.29e-08	ACSM3	acyl-CoA synthetase medium-chain family member 3	Multiple_Complex
TC1000011370.hg.1	8.8	11.01	-4.62	1.25e-21	1.42e-19	ACTA2	actin, alpha 2, smooth muscle, aorta	Multiple_Complex
TC1400009529.hg.1	13.22	5.63	192.14	4.62e-38	3.81e-35	ACTN1; HMGN1P3	actinin, alpha 1; high mobility group nucleosome binding domain 1 pseudogene 3	Multiple_Complex
TC1900008020.hg.1	9.52	11.97	-5.48	4.09e-18	2.72e-16	ACTN4	actinin, alpha 4	Multiple_Complex
TC0200014694.hg.1	8.01	5.85	4.46	1.23e-14	5.22e-13	ACVR1C	activin A receptor type IC	Multiple_Complex
TC0700008265.hg.1	5.59	6.76	-2.24	1.67e-06	1.89e-05	ADAM22	ADAM metallopeptidase domain 22	Multiple_Complex
TC0700013500.hg.1	6.32	7.65	-2.52	3.29e-09	6.24e-08	ADAP1	ArfGAP with dual PH domains 1	Multiple_Complex
TC0600013425.hg.1	7.45	8.88	-2.7	0.0003	0.0017	ADAT2	adenosine deaminase, tRNA-specific 2	Multiple_Complex
TC1600009210.hg.1	6.63	7.88	-2.38	3.56e-11	9.18e-10	ADCY9	adenylate cyclase 9	Multiple_Complex
TC0200013001.hg.1	5.82	4.44	2.6	3.51e-15	1.64e-13	ADD2	adducin 2 (beta)	Multiple_Complex
TC1000008875.hg.1	6.02	7.16	-2.2	0.0001	0.001	ADD3	adducin 3 (gamma)	Multiple_Complex
TC1600008005.hg.1	3.89	11.91	-260.15	2e-33	9.53e-31	ADGRG1	adhesion G protein-coupled receptor G1	Multiple_Complex
TC1600008003.hg.1	4.27	9.74	-44.4	2.93e-32	1.23e-29	ADGRG5	adhesion G protein-coupled receptor G5	Multiple_Complex
TC0800012308.hg.1	7.99	9.91	-3.77	8.24e-14	3.09e-12	ADHFE1; C8orf46	alcohol dehydrogenase, iron containing 1; chromosome 8 open reading frame 46	Multiple_Complex
TC1000008063.hg.1	10.37	9.14	2.35	3.34e-09	6.32e-08	ADK; MRPL35P3	adenosine kinase; mitochondrial ribosomal protein L35 pseudogene 3	Multiple_Complex
TC1700006877.hg.1	11.55	8.85	6.51	2.22e-28	5.12e-26	ADPRM	ADP-ribose/CDP-alcohol diphosphatase, manganese-dependent	Multiple_Complex
TC0500009046.hg.1	5.01	7.98	-7.83	5.64e-24	8.35e-22	ADRB2	adrenoceptor beta 2, surface	Coding
TC2200009275.hg.1	8.06	7.01	2.08	3.03e-11	7.92e-10	ADSL	adenylosuccinate lyase	Multiple_Complex
TC1400008452.hg.1	7.48	6.47	2.02	8.15e-07	9.86e-06	ADSSL1	adenylosuccinate synthase like 1	Multiple_Complex
TC0700007370.hg.1	6.69	5.12	2.97	1.77e-13	6.3e-12	AEBP1; MIR4649	AE binding protein 1; microRNA 4649	Multiple_Complex
TC0200011188.hg.1	4.71	6.14	-2.7	1.2e-09	2.46e-08	AGAP1	ArfGAP with GTPase domain, ankyrin repeat and PH domain 1	Multiple_Complex
TC1000010509.hg.1	11.25	12.39	-2.2	0.0001	0.0008	AGAP4	ArfGAP with GTPase domain, ankyrin repeat and PH domain 4	Multiple_Complex
TC1000007598.hg.1	11.54	12.55	-2.01	0.0011	0.0053	AGAP6	ArfGAP with GTPase domain, ankyrin repeat and PH domain 6	Multiple_Complex
TC0700008552.hg.1	8.91	10.57	-3.17	1.67e-08	2.79e-07	AGFG2	ArfGAP with FG repeats 2	Multiple_Complex
TC0100013003.hg.1	5.17	4.09	2.12	6.17e-07	7.68e-06	AGMAT	agmatinase	Coding
TC0100007784.hg.1	5.81	8.54	-6.63	1.38e-19	1.16e-17	AGO4	argonaute RISC catalytic component 4	Multiple_Complex
TC0600013794.hg.1	4.11	8.06	-15.5	1.79e-21	2.01e-19	AGPAT4	1-acylglycerol-3-phosphate O-acyltransferase 4	Multiple_Complex
TC0600013797.hg.1	5.77	7.82	-4.14	4.76e-13	1.61e-11	AGPAT4-IT1	AGPAT4 intronic transcript 1	NonCoding
TC0100006865.hg.1	7.73	8.86	-2.19	4.1e-09	7.66e-08	AGTRAP	angiotensin II receptor-associated protein	Multiple_Complex
TC1100011083.hg.1	4.82	7.62	-6.95	5.37e-19	4e-17	AHNAK	AHNAK nucleoprotein	Multiple_Complex
TC0700006795.hg.1	11.54	10.2	2.53	8.98e-08	1.33e-06	AHR	aryl hydrocarbon receptor	Multiple_Complex
TC0200007717.hg.1	10.52	11.93	-2.66	4e-05	0.0003	AHSA2	AHA1, activator of heat shock 90kDa protein ATPase homolog 2 (yeast)	Multiple_Complex
TC0600007598.hg.1	11.12	4.86	76.77	6.11e-31	1.99e-28	AIF1	allograft inflammatory factor 1	Multiple_Complex
TC0100016086.hg.1	6.69	9.99	-9.87	2.02e-21	2.24e-19	AIM2	absent in melanoma 2	Multiple_Complex
TC0900012277.hg.1	9.85	12.77	-7.56	2.17e-10	5.06e-09	AK1	adenylate kinase 1	Coding
TC0100008618.hg.1	8.43	6.17	4.79	6.84e-17	3.9e-15	AK4	adenylate kinase 4	Multiple_Complex
TC0100008797.hg.1	5.84	4.26	2.99	1.07e-10	2.61e-09	AK5	adenylate kinase 5	Multiple_Complex
TC1500008187.hg.1	11.42	12.98	-2.94	7.99e-16	4.02e-14	AKAP13; MIR7706	A kinase (PRKA) anchor protein 13; microRNA 7706	Multiple_Complex
TC0600009446.hg.1	6.03	4.6	2.71	1.31e-10	3.15e-09	AKAP7	A kinase (PRKA) anchor protein 7	Multiple_Complex
TC0600012514.hg.1	6.64	7.66	-2.03	3.01e-08	4.82e-07	AKIRIN2	akirin 2	Multiple_Complex
TC0900011284.hg.1	11.54	13.47	-3.83	4.37e-17	2.51e-15	AKNA	AT-hook transcription factor	Multiple_Complex
TC1000006604.hg.1	5.42	3.45	3.92	1.3e-09	2.66e-08	AKR1E2	aldo-keto reductase family 1, member E2	Multiple_Complex
TC1900011932.hg.1	8.19	9.56	-2.58	0.0002	0.0014	ALKBH6	alkB homolog 6	Multiple_Complex
TC1900006796.hg.1	8.74	7.39	2.55	2.42e-06	2.64e-05	ALKBH7	alkB homolog 7	Multiple_Complex
TC1300006770.hg.1	12.83	15.09	-4.78	8.02e-16	4.02e-14	ALOX5AP	arachidonate 5-lipoxygenase-activating protein	Multiple_Complex
TC0400008429.hg.1	7.05	4.91	4.4	3.71e-17	2.16e-15	ALPK1	alpha kinase 1	Multiple_Complex
TC1800008804.hg.1	4.52	5.72	-2.3	7.34e-05	0.0005	ALPK2	alpha kinase 2	Multiple_Complex
TC1100012471.hg.1	13	11.76	2.36	6.02e-06	5.9e-05	AMICA1	adhesion molecule, interacts with CXADR antigen 1	Multiple_Complex
TC0100015200.hg.1	7.43	5.98	2.74	6.99e-14	2.66e-12	AMIGO1	adhesion molecule with Ig-like domain 1	Coding
TC0X00010532.hg.1	5.2	6.22	-2.03	1.71e-08	2.85e-07	AMOT; MIR4329	angiomotin; microRNA 4329	Multiple_Complex
TC1200012202.hg.1	9.94	10.98	-2.04	0.0013	0.0063	ANAPC5	anaphase promoting complex subunit 5	Multiple_Complex
TC1100008126.hg.1	10.41	11.75	-2.54	2.62e-12	8e-11	ANKRD13D	ankyrin repeat domain 13 family, member D	Multiple_Complex
TC0900012126.hg.1	4.06	5.27	-2.32	0.0003	0.0016	ANKRD20A3; ANKRD20A2	ankyrin repeat domain 20 family, member A3; ankyrin repeat domain 20 family, member A2	Multiple_Complex
TC1800009218.hg.1	5.33	6.39	-2.08	0.0014	0.0065	ANKRD20A5P; RHOT1P1	ankyrin repeat domain 20 family, member A5, pseudogene; ras homolog family member T1 pseudogene 1	Multiple_Complex
TC0200016712.hg.1	5.43	6.46	-2.03	2.14e-07	2.95e-06	ANKRD23	ankyrin repeat domain 23	Multiple_Complex
TC0300010413.hg.1	6.2	7.97	-3.39	4.22e-07	5.46e-06	ANKRD28	ankyrin repeat domain 28	Multiple_Complex
TC0500011160.hg.1	5.72	4.55	2.26	4.67e-08	7.26e-07	ANKRD31	ankyrin repeat domain 31	Multiple_Complex
TC0200008534.hg.1	10.07	11.38	-2.47	4.47e-10	9.91e-09	ANKRD36	ankyrin repeat domain 36	Multiple_Complex
TC0200016710.hg.1	11.28	12.67	-2.62	9.23e-08	1.37e-06	ANKRD36C	ankyrin repeat domain 36C	Multiple_Complex
TC1200010902.hg.1	6.62	7.69	-2.1	0.0004	0.0023	ANKRD52	ankyrin repeat domain 52	Multiple_Complex
TC0900007576.hg.1	14.06	16.7	-6.21	9.46e-15	4.12e-13	ANXA1	annexin A1	Multiple_Complex
TC1500009636.hg.1	5.84	8.76	-7.59	1.33e-16	7.31e-15	ANXA2	annexin A2	Multiple_Complex
TC0500010628.hg.1	14.06	12.9	2.23	3.27e-12	9.84e-11	ANXA2R	annexin A2 receptor	Coding
TC0200016469.hg.1	5.66	6.79	-2.19	9.58e-09	1.68e-07	ANXA4	annexin A4	Multiple_Complex
TC0400011744.hg.1	8.04	9.49	-2.72	2.82e-08	4.53e-07	ANXA5	annexin A5	Multiple_Complex
TC0700010751.hg.1	8.04	13.73	-51.52	3.91e-32	1.58e-29	AOAH	acyloxyacyl hydrolase (neutrophil)	Multiple_Complex
TC1400010718.hg.1	7.24	8.54	-2.46	6.47e-07	8.04e-06	AP1G2	adaptor-related protein complex 1, gamma 2 subunit	Multiple_Complex
TC1900009208.hg.1	8.09	9.24	-2.21	0.0008	0.004	AP3D1	adaptor-related protein complex 3, delta 1 subunit	Multiple_Complex
TC1200008574.hg.1	6.37	7.47	-2.15	1.9e-07	2.64e-06	APAF1	apoptotic peptidase activating factor 1	Multiple_Complex
TC1100009969.hg.1	8.06	6.86	2.29	5.05e-09	9.29e-08	APBB1	amyloid beta (A4) precursor protein-binding, family B, member 1 (Fe65)	Multiple_Complex
TC0300007386.hg.1	4.81	5.9	-2.13	3.87e-06	4.01e-05	APEH	acylaminoacyl-peptide hydrolase	Multiple_Complex
TC1400006519.hg.1	11.67	10.5	2.25	1.31e-16	7.21e-15	APEX1	APEX nuclease (multifunctional DNA repair enzyme) 1	Multiple_Complex
TC0200016464.hg.1	9.32	8.21	2.16	0.0003	0.0017	APLF	aprataxin and PNKP like factor	Multiple_Complex
TC1100009521.hg.1	6.72	8.03	-2.48	4.25e-07	5.51e-06	APLP2	amyloid beta (A4) precursor-like protein 2	Multiple_Complex
TC2000008721.hg.1	8.7	13.07	-20.67	3.54e-37	2.38e-34	APMAP	adipocyte plasma membrane associated protein	Multiple_Complex
TC2200009271.hg.1	11.35	14.22	-7.29	1.57e-28	3.86e-26	APOBEC3C	apolipoprotein B mRNA editing enzyme, catalytic polypeptide-like 3C	Multiple_Complex
TC2200009272.hg.1	8.13	10.67	-5.82	2.43e-20	2.31e-18	APOBEC3D	apolipoprotein B mRNA editing enzyme, catalytic polypeptide-like 3D	Coding
TC2200009273.hg.1	10.3	11.72	-2.68	1.08e-11	3.03e-10	APOBEC3F	apolipoprotein B mRNA editing enzyme, catalytic polypeptide-like 3F	Multiple_Complex
TC2200009274.hg.1	9.59	13.01	-10.66	1.66e-27	3.39e-25	APOBEC3G	apolipoprotein B mRNA editing enzyme, catalytic polypeptide-like 3G	Multiple_Complex
TC2200007382.hg.1	4.88	7.49	-6.12	1.41e-13	5.15e-12	APOBEC3H	apolipoprotein B mRNA editing enzyme, catalytic polypeptide-like 3H	Multiple_Complex
TC2200008588.hg.1	9.41	8.31	2.15	1.72e-07	2.43e-06	APOL3	apolipoprotein L, 3	Multiple_Complex
TC2100007803.hg.1	8.73	6.29	5.43	1e-20	1e-18	APP	amyloid beta (A4) precursor protein	Multiple_Complex
TC0300007572.hg.1	10.16	11.24	-2.11	6.08e-08	9.24e-07	APPL1	adaptor protein, phosphotyrosine interaction, PH domain and leucine zipper containing 1	Multiple_Complex
TC0900009860.hg.1	8.6	6.58	4.05	8.34e-21	8.52e-19	AQP3	aquaporin 3 (Gill blood group)	Multiple_Complex
TC0400012917.hg.1	9.58	12.17	-6.02	3.85e-21	4.11e-19	ARAP2	ArfGAP with RhoGAP domain, ankyrin repeat and PH domain 2	Multiple_Complex
TC0400012916.hg.1	6.21	8.76	-5.89	1.14e-10	2.78e-09	ARAP2	ArfGAP with RhoGAP domain, ankyrin repeat and PH domain 2	NonCoding
TC1400007098.hg.1	14.14	15.45	-2.47	1.58e-18	1.12e-16	ARF6	ADP-ribosylation factor 6	Multiple_Complex
TC1100010712.hg.1	9.96	11.03	-2.1	8.31e-07	1e-05	ARHGAP1	Rho GTPase activating protein 1	Multiple_Complex
TC1500010707.hg.1	5.42	7.52	-4.29	1.86e-12	5.79e-11	ARHGAP11B	Rho GTPase activating protein 11B	Multiple_Complex
TC1500010709.hg.1	4.57	6.01	-2.71	4.7e-09	8.71e-08	ARHGAP11B	Rho GTPase activating protein 11B	NonCoding
TC1500006785.hg.1	5.05	6.94	-3.69	3.87e-12	1.16e-10	ARHGAP11B; ARHGAP11A	Rho GTPase activating protein 11B; Rho GTPase activating protein 11A	Multiple_Complex
TC0600013147.hg.1	4.67	6.76	-4.26	1.04e-13	3.83e-12	ARHGAP18	Rho GTPase activating protein 18	Multiple_Complex
TC1000010065.hg.1	6.13	7.33	-2.28	7.49e-07	9.14e-06	ARHGAP21	Rho GTPase activating protein 21	Multiple_Complex
TC0200007900.hg.1	9.36	11.41	-4.16	8.32e-13	2.71e-11	ARHGAP25	Rho GTPase activating protein 25	Multiple_Complex
TC0500008941.hg.1	7.99	11.01	-8.1	1.66e-30	5.09e-28	ARHGAP26	Rho GTPase activating protein 26	Multiple_Complex
TC1900008399.hg.1	7.34	9.6	-4.79	2.17e-18	1.52e-16	ARHGAP35	Rho GTPase activating protein 35	Multiple_Complex
TC2200009284.hg.1	4.22	5.66	-2.72	1.03e-05	9.51e-05	ARHGAP8	Rho GTPase activating protein 8	Multiple_Complex
TC1200010967.hg.1	9.94	11.5	-2.96	5.13e-10	1.13e-08	ARHGAP9	Rho GTPase activating protein 9	Multiple_Complex
TC1100009287.hg.1	5.53	7.77	-4.71	1.12e-11	3.14e-10	ARHGEF12	Rho guanine nucleotide exchange factor (GEF) 12	Multiple_Complex
TC0300011259.hg.1	8.78	10.21	-2.7	1.57e-08	2.63e-07	ARHGEF3	Rho guanine nucleotide exchange factor 3	Multiple_Complex
TC0X00009869.hg.1	10.21	11.66	-2.73	6.61e-10	1.42e-08	ARHGEF9; ARHGEF9-IT1	Cdc42 guanine nucleotide exchange factor 9; ARHGEF9 intronic transcript 1	Multiple_Complex
TC0100007477.hg.1	9.84	10.84	-2.01	2.2e-05	0.0002	ARID1A	AT rich interactive domain 1A (SWI-like)	Multiple_Complex
TC0200008507.hg.1	11.61	9.72	3.69	6.17e-11	1.55e-09	ARID5A	AT rich interactive domain 5A (MRF1-like)	Multiple_Complex
TC1000007761.hg.1	7.68	10.94	-9.61	1.91e-21	2.13e-19	ARID5B	AT rich interactive domain 5B (MRF1-like)	Multiple_Complex
TC1100007168.hg.1	11.08	10.06	2.04	0.0002	0.0014	ARL14EP	ADP-ribosylation factor like GTPase 14 effector protein	Multiple_Complex
TC0500010731.hg.1	6.13	7.28	-2.23	2.23e-06	2.45e-05	ARL15	ADP-ribosylation factor like GTPase 15	Multiple_Complex
TC1100013037.hg.1	11.71	10.49	2.33	1.59e-08	2.67e-07	ARL2	ADP-ribosylation factor like GTPase 2	Multiple_Complex
TC0200016739.hg.1	4.44	5.6	-2.24	7.91e-06	7.51e-05	ARL5A	ADP-ribosylation factor like GTPase 5A	NonCoding
TC0200010788.hg.1	13.91	14.91	-2	5.61e-12	1.64e-10	ARPC2	actin related protein 2/3 complex subunit 2	Multiple_Complex
TC0900008742.hg.1	8.24	9.41	-2.24	1.35e-09	2.74e-08	ARPC5L	actin related protein 2/3 complex subunit 5-like	Multiple_Complex
TC1100011643.hg.1	9.85	8.74	2.16	0.0004	0.0024	ARRB1	arrestin, beta 1	Multiple_Complex
TC1700006638.hg.1	11.32	12.56	-2.37	4.16e-12	1.25e-10	ARRB2	arrestin, beta 2	Multiple_Complex
TC1900007358.hg.1	9.15	6.67	5.56	6.21e-15	2.8e-13	ARRDC2	arrestin domain containing 2	Multiple_Complex
TC1200007594.hg.1	6.35	3.65	6.51	4.78e-24	7.11e-22	ASIC1	acid sensing ion channel 1	Multiple_Complex
TC0700013380.hg.1	7	8.08	-2.12	4.7e-06	4.75e-05	ASL	argininosuccinate lyase	Multiple_Complex
TC0200016645.hg.1	10.27	11.43	-2.24	2.18e-08	3.57e-07	ASXL2	additional sex combs like transcriptional regulator 2	Multiple_Complex
TC0600014267.hg.1	11.6	12.89	-2.44	6.26e-10	1.35e-08	ATF6B	activating transcription factor 6 beta	Multiple_Complex
TC1200006935.hg.1	10.31	12.19	-3.68	7.94e-15	3.5e-13	ATF7IP	activating transcription factor 7 interacting protein	Multiple_Complex
TSUnmapped00000109.hg.1	9.28	10.41	-2.18	2.02e-05	0.0002	ATG16L1	autophagy related 16-like 1	NonCoding
TC1100008370.hg.1	5.77	7.06	-2.44	4.7e-05	0.0004	ATG16L2	autophagy related 16-like 2	Multiple_Complex
TC0200011419.hg.1	6.78	7.97	-2.28	3.29e-07	4.37e-06	ATG4B	autophagy related 4B, cysteine peptidase	Multiple_Complex
TC0200010713.hg.1	10.72	9.52	2.29	1.77e-07	2.49e-06	ATIC	5-aminoimidazole-4-carboxamide ribonucleotide formyltransferase/IMP cyclohydrolase	Multiple_Complex
TC1100008985.hg.1	13.99	12.72	2.42	2.82e-08	4.53e-07	ATM	ATM serine/threonine kinase	Multiple_Complex
TC0100010543.hg.1	5.12	6.24	-2.16	9.17e-05	0.0006	ATP1B1	ATPase, Na+/K+ transporting, beta 1 polypeptide	Multiple_Complex
TC1700009498.hg.1	11.38	12.51	-2.19	2.72e-06	2.93e-05	ATP2A3	ATPase, Ca++ transporting, ubiquitous	Multiple_Complex
TC1200011474.hg.1	7.61	8.72	-2.15	0.0007	0.0035	ATP2B1	ATPase, Ca++ transporting, plasma membrane 1	Multiple_Complex
TC0100011267.hg.1	12.42	15.66	-9.47	1.79e-24	2.82e-22	ATP2B4	ATPase, Ca++ transporting, plasma membrane 4	Multiple_Complex
TC1900010748.hg.1	7.57	8.62	-2.06	2e-05	0.0002	ATP5SL	ATP5S-like	Multiple_Complex
TC1700007890.hg.1	8.45	7.43	2.03	0.0001	0.0008	ATP6V0A1; MIR5010	ATPase, H+ transporting, lysosomal V0 subunit a1; microRNA 5010	Multiple_Complex
TC0900008515.hg.1	12.8	11.46	2.54	2.11e-10	4.93e-09	ATP6V1G1	ATPase, H+ transporting, lysosomal 13kDa, V1 subunit G1	Multiple_Complex
TC0600010936.hg.1	5.27	7.01	-3.35	1.25e-08	2.14e-07	ATXN1	Memczak2013 ALT_ACCEPTOR, ALT_DONOR, coding, INTERNAL, intronic best transcript NM_000332	NonCoding
TC0600010921.hg.1	7.52	9.2	-3.21	9.24e-12	2.62e-10	ATXN1	ataxin 1	Multiple_Complex
TC1600011426.hg.1	9.38	11.36	-3.94	7.22e-15	3.21e-13	ATXN1L	ataxin 1-like	Multiple_Complex
TC0700012165.hg.1	7.8	8.86	-2.09	1.71e-07	2.41e-06	ATXN7L1	ataxin 7-like 1	Multiple_Complex
TC0700007905.hg.1	6.15	12.41	-76.24	1.38e-37	1.02e-34	AUTS2	autism susceptibility candidate 2	Multiple_Complex
TC1100012930.hg.1	3.97	6.41	-5.42	4.35e-17	2.51e-15	B3GAT1	beta-1,3-glucuronyltransferase 1	Multiple_Complex
TC0300012112.hg.1	6.28	7.62	-2.54	4.63e-09	8.59e-08	B4GALT4	UDP-Gal:betaGlcNAc beta 1,4- galactosyltransferase, polypeptide 4	Multiple_Complex
TC2000009392.hg.1	5.43	8	-5.97	4.66e-23	6.28e-21	B4GALT5	UDP-Gal:betaGlcNAc beta 1,4- galactosyltransferase, polypeptide 5	Multiple_Complex
TC0600012562.hg.1	6.55	5.03	2.88	2.76e-08	4.46e-07	BACH2	Memczak2013 ALT_ACCEPTOR, ALT_DONOR, coding, INTERNAL, intronic best transcript NM_001170794	NonCoding
TC0600008787.hg.1	6.43	4.89	2.91	2.95e-06	3.14e-05	BACH2	Memczak2013 ANTISENSE, coding, INTERNAL, intronic best transcript NM_001170794	NonCoding
TC0600012560.hg.1	5.84	4.21	3.11	1.21e-07	1.75e-06	BACH2	Memczak2013 ALT_ACCEPTOR, ALT_DONOR, coding, INTERNAL, intronic best transcript NM_001170794	NonCoding
TC0600012556.hg.1	7.48	5.58	3.74	2.93e-11	7.69e-10	BACH2	Transcript Identified by AceView, Entrez Gene ID(s) 60468	Unassigned
TC0600012554.hg.1	7.45	4.86	6.02	3.98e-19	3.02e-17	BACH2	BTB and CNC homology 1, basic leucine zipper transcription factor 2	Multiple_Complex
TC1600008799.hg.1	10.57	11.61	-2.05	1.18e-08	2.04e-07	BANP	BTG3 associated nuclear protein	Multiple_Complex
TC0200014719.hg.1	6.61	8.97	-5.15	1.1e-15	5.41e-14	BAZ2B	bromodomain adjacent to zinc finger domain 2B	Multiple_Complex
TC0200014725.hg.1	5.89	7.04	-2.22	4.58e-08	7.13e-07	BAZ2B	bromodomain adjacent to zinc finger domain 2B	NonCoding
TC1400007712.hg.1	9.6	10.94	-2.54	2.48e-06	2.69e-05	BATF	basic leucine zipper transcription factor, ATF-like	Multiple_Complex
TC2000007707.hg.1	7.17	6.14	2.04	2.21e-10	5.14e-09	BCAS4	breast carcinoma amplified sequence 4	Multiple_Complex
TC1500010184.hg.1	11.5	10.13	2.58	5.62e-06	5.55e-05	BCL2A1	BCL2-related protein A1	Coding
TC2000008815.hg.1	6.28	7.39	-2.15	4.36e-08	6.81e-07	BCL2L1	BCL2-like 1	Multiple_Complex
TC0200008870.hg.1	9.31	10.86	-2.92	1.16e-08	2e-07	BCL2L11	BCL2-like 11 (apoptosis facilitator)	Multiple_Complex
TC1200009192.hg.1	5.41	4.33	2.11	1.71e-08	2.85e-07	BCL7A	B-cell CLL/lymphoma 7A	Multiple_Complex
TC0100009788.hg.1	10.26	8.87	2.63	2.38e-14	9.8e-13	BCL9	B-cell CLL/lymphoma 9	Multiple_Complex
TC0600013273.hg.1	9.15	10.22	-2.09	6.53e-06	6.34e-05	BCLAF1	Memczak2013 ALT_DONOR, coding, INTERNAL, intronic best transcript NM_014739	NonCoding
TC0X00009427.hg.1	8.54	9.59	-2.06	1.6e-06	1.82e-05	BCOR	BCL6 corepressor	Multiple_Complex
TC0X00008394.hg.1	8.22	9.28	-2.07	1.3e-05	0.0001	BCORL1	BCL6 corepressor-like 1	Multiple_Complex
TC0X00010409.hg.1	8.74	6.54	4.6	1.85e-16	9.97e-15	BEX2	brain expressed X-linked 2	Coding
TC0X00007999.hg.1	9.94	7.45	5.61	2.46e-19	1.94e-17	BEX4	brain expressed X-linked 4	Multiple_Complex
TC0X00010382.hg.1	10.24	7.56	6.4	1.88e-24	2.94e-22	BEX5	brain expressed X-linked 5	Multiple_Complex
TC0300006483.hg.1	11.73	13.5	-3.4	1.28e-15	6.26e-14	BHLHE40	basic helix-loop-helix family, member e40	Multiple_Complex
TC1200010703.hg.1	10.94	12.55	-3.06	3.43e-15	1.61e-13	BIN2	bridging integrator 2	Multiple_Complex
TC1100013088.hg.1	11.57	10.47	2.14	9.24e-05	0.0007	BIRC2	baculoviral IAP repeat containing 2	Multiple_Complex
TC2000010009.hg.1	7.21	8.45	-2.36	4.23e-06	4.33e-05	BLCAP	bladder cancer associated protein	NonCoding
TC1000008315.hg.1	7.71	9.36	-3.14	7.74e-16	3.91e-14	BMPR1A	bone morphogenetic protein receptor type IA	Multiple_Complex
TC1900010045.hg.1	8.32	9.55	-2.35	3.03e-05	0.0002	BORCS8; MEF2B; MEF2BNB-MEF2B	BLOC-1 related complex subunit 8; myocyte enhancer factor 2B; MEF2BNB-MEF2B readthrough	Multiple_Complex
TC0700009232.hg.1	9.52	10.68	-2.24	2.62e-07	3.55e-06	BPGM	2,3-bisphosphoglycerate mutase	Coding
TC1700008709.hg.1	12.73	13.74	-2.01	1.21e-06	1.42e-05	BPTF	bromodomain PHD finger transcription factor	Multiple_Complex
TC0200016421.hg.1	11.03	12.14	-2.16	1.63e-08	2.73e-07	BRE	brain and reproductive organ-expressed (TNFRSF1A modulator)	Multiple_Complex
TC0100011695.hg.1	10.12	11.43	-2.48	2.07e-08	3.41e-07	BROX	BRO1 domain and CAAX motif containing	Multiple_Complex
TC0700006781.hg.1	7.52	5.66	3.62	2.87e-14	1.17e-12	BZW2	basic leucine zipper and W2 domains 2	Multiple_Complex
TC1200008743.hg.1	8.46	5.94	5.74	9.13e-17	5.13e-15	BTBD11	BTB (POZ) domain containing 11	Multiple_Complex
TC1200011506.hg.1	9.41	7.8	3.06	3.8e-13	1.3e-11	BTG1; LINC01619	B-cell translocation gene 1, anti-proliferative; long intergenic non-protein coding RNA 1619	Multiple_Complex
TC0300011997.hg.1	7.08	5.78	2.45	0.0002	0.0012	BTLA	B and T lymphocyte associated	Multiple_Complex
TC0600007307.hg.1	8.06	9.52	-2.75	1.7e-08	2.84e-07	BTN2A1	butyrophilin, subfamily 2, member A1	Multiple_Complex
TC0600007303.hg.1	12.67	13.79	-2.18	1.34e-09	2.73e-08	BTN3A1	butyrophilin, subfamily 3, member A1	Multiple_Complex
TC0600007301.hg.1	16.5	17.83	-2.51	9.44e-14	3.51e-12	BTN3A2	butyrophilin, subfamily 3, member A2	Multiple_Complex
TC1000010593.hg.1	5.57	6.86	-2.44	9.42e-07	1.13e-05	C10orf128	chromosome 10 open reading frame 128	Multiple_Complex
TC1000010483.hg.1	5.74	4.68	2.08	2.2e-07	3.03e-06	C10orf25	chromosome 10 open reading frame 25	Multiple_Complex
TC1100009040.hg.1	10.68	8.39	4.88	1.29e-19	1.09e-17	C11orf1	chromosome 11 open reading frame 1	Coding
TC1100009335.hg.1	5.79	6.86	-2.09	1.53e-05	0.0001	C11orf63	chromosome 11 open reading frame 63	Multiple_Complex
TC1200008703.hg.1	8.49	7.33	2.24	1.91e-12	5.94e-11	C12orf45	chromosome 12 open reading frame 45	Multiple_Complex
TC1200006656.hg.1	15.71	13.84	3.66	1.41e-19	1.19e-17	C12orf57; RNU7-1	chromosome 12 open reading frame 57; RNA, U7 small nuclear 1	Multiple_Complex
TC1200009235.hg.1	12.97	11.63	2.53	9.01e-11	2.21e-09	C12orf65	chromosome 12 open reading frame 65	Multiple_Complex
TC1200011081.hg.1	8	6.71	2.46	2.9e-11	7.63e-10	C12orf66	chromosome 12 open reading frame 66	Multiple_Complex
TC1200012700.hg.1	6.71	11.9	-36.53	4.43e-33	1.98e-30	C12orf75	chromosome 12 open reading frame 75	Multiple_Complex
TC1700010101.hg.1	6.17	5.14	2.04	9.57e-07	1.14e-05	C17orf51	chromosome 17 open reading frame 51	Multiple_Complex
TC1800006891.hg.1	9.38	10.93	-2.94	1.13e-13	4.16e-12	C18orf8	chromosome 18 open reading frame 8	Multiple_Complex
TC1900011253.hg.1	3.88	5.36	-2.79	3.79e-10	8.52e-09	C19orf84	chromosome 19 open reading frame 84	Multiple_Complex
TC0100010887.hg.1	6.22	12.61	-83.95	8.97e-44	2.41e-40	C1orf21	chromosome 1 open reading frame 21	Multiple_Complex
TC1700012341.hg.1	10.22	8.34	3.69	7.99e-17	4.5e-15	C1QBP	complement component 1, q subcomponent binding protein	Multiple_Complex
TC0500013298.hg.1	5.53	6.63	-2.15	0.0002	0.0011	C1QTNF3	C1q and tumor necrosis factor related protein 3	Multiple_Complex
TC1200012745.hg.1	6.49	7.68	-2.28	0.0021	0.0092	C1RL	complement component 1, r subcomponent-like	Multiple_Complex
TC2000008218.hg.1	5.71	7.21	-2.84	5.04e-07	6.41e-06	C20orf194	chromosome 20 open reading frame 194	Multiple_Complex
TC1100011606.hg.1	8.84	10.01	-2.25	4e-06	4.12e-05	C2CD3	C2 calcium-dependent domain containing 3	Multiple_Complex
TC0200009350.hg.1	6.71	4.64	4.2	6.24e-14	2.4e-12	C2orf27A	chromosome 2 open reading frame 27A	Multiple_Complex
TC0200008749.hg.1	4.72	3.58	2.2	6.77e-06	6.54e-05	C2orf40	chromosome 2 open reading frame 40	Multiple_Complex
TC1200009807.hg.1	5.27	7.86	-6.02	1.02e-14	4.41e-13	C3AR1	complement component 3a receptor 1	Coding
TC0400008424.hg.1	9.38	6.97	5.3	2.35e-16	1.24e-14	C4orf32	chromosome 4 open reading frame 32	Coding
TC0500010511.hg.1	7.36	8.36	-2.01	2.64e-05	0.0002	C5orf42	chromosome 5 open reading frame 42	Multiple_Complex
TC0600013144.hg.1	4.23	5.6	-2.6	2.35e-09	4.53e-08	C6orf191andARHGAP18; RP1-69D17.4; RP1-69D17.3; TCONS_l2_00025470; TCONS_l2_00024911; LAMA2	Transcript Identified by AceView, Entrez Gene ID(s) 93663; 253582; Jeck2013 ALT_ACCEPTOR, ALT_DONOR, downstream_end, ncRNA, OVEXON, upstream_start best transcript TCONS_l2_00025470; Jeck2013 ALT_ACCEPTOR, ncRNA, OVEXON, upstream_start best transcript TCONS_l2_00024911; Salzman2013 ANTISENSE, CDS, coding, downstream_end, intronic, OVCODE, OVEXON, UTR3 best transcript NM_000426; Salzman2013 ANNOTAT…	NonCoding
TC0600007617.hg.1	16.68	15.28	2.65	5.35e-18	3.47e-16	C6orf48; SNORD52; SNORD48	chromosome 6 open reading frame 48; small nucleolar RNA, C/D box 52; small nucleolar RNA, C/D box 48	Multiple_Complex
TC0900009253.hg.1	9.49	10.65	-2.23	6.04e-06	5.92e-05	C9orf142	chromosome 9 open reading frame 142	Multiple_Complex
TC0900011232.hg.1	6.86	5.77	2.13	3.02e-06	3.21e-05	C9orf147; HSDL2	Transcript Identified by AceView, Entrez Gene ID(s) 100133204; Salzman2013 ANTISENSE, CDS, coding, downstream_end, intronic, OVCODE, OVERLAPTX, OVEXON, UTR3 best transcript NM_032303; chromosome 9 open reading frame 147; chromosome 9 open reading frame 147 [Source:HGNC Symbol;Acc:HGNC:31438]	NonCoding
TC0100006761.hg.1	7.01	4.3	6.56	3.48e-18	2.36e-16	CA6	carbonic anhydrase VI	Multiple_Complex
TC0100008602.hg.1	4.41	3.03	2.59	2.95e-12	8.98e-11	CACHD1	cache domain containing 1	Multiple_Complex
TC1700010563.hg.1	8.13	10.19	-4.18	9.31e-17	5.22e-15	CACNB1	calcium channel, voltage-dependent, beta 1 subunit	Multiple_Complex
TC1200007535.hg.1	6.56	8.52	-3.9	1.07e-11	3.03e-10	CACNB3	calcium channel, voltage-dependent, beta 3 subunit	Multiple_Complex
TC1100012389.hg.1	4.32	9.35	-32.71	5.59e-28	1.22e-25	CADM1	cell adhesion molecule 1	Multiple_Complex
TC1200010812.hg.1	9.02	10.76	-3.34	2.25e-14	9.28e-13	CALCOCO1	calcium binding and coiled-coil domain 1	Multiple_Complex
TC1000011718.hg.1	6.63	9.37	-6.68	2.51e-23	3.52e-21	CALHM2	calcium homeostasis modulator 2	Multiple_Complex
TC0100013182.hg.1	8.67	10.21	-2.91	1.44e-12	4.58e-11	CAMK2N1	calcium/calmodulin-dependent protein kinase II inhibitor 1	Multiple_Complex
TC0500008309.hg.1	11.77	9.58	4.57	4.18e-13	1.42e-11	CAMK4	calcium/calmodulin-dependent protein kinase IV	Multiple_Complex
TC0100011148.hg.1	5.8	4.61	2.28	3.72e-06	3.87e-05	CAMSAP2	calmodulin regulated spectrin-associated protein family, member 2	Multiple_Complex
TC0100011721.hg.1	9.67	12.01	-5.09	1.12e-14	4.79e-13	CAPN2	calpain 2, (m/II) large subunit	Multiple_Complex
TC1500010725.hg.1	6.89	8.07	-2.26	0.0037	0.0146	CAPN3	calpain 3	Multiple_Complex
TC1200010265.hg.1	9.78	11.06	-2.43	1.55e-12	4.92e-11	CAPRIN2	caprin family member 2	Multiple_Complex
TC1100013221.hg.1	9.72	11.29	-2.99	3.67e-13	1.26e-11	CASP1	caspase 1	Multiple_Complex
TC0200010445.hg.1	8.47	6.08	5.26	5.42e-14	2.09e-12	CASP10	caspase 10	Multiple_Complex
TC0400011578.hg.1	9.2	7.79	2.65	2.82e-06	3.03e-05	CASP6	caspase 6	Multiple_Complex
TC1400010776.hg.1	4.65	6.24	-3.02	6.53e-07	8.11e-06	CATSPERB	catsper channel auxiliary subunit beta	Multiple_Complex
TC0300011899.hg.1	12.08	13.33	-2.39	1.1e-11	3.08e-10	CBLB	Cbl proto-oncogene B, E3 ubiquitin protein ligase	Multiple_Complex
TC2100007037.hg.1	8.94	5.58	10.23	2.46e-27	4.84e-25	CBR3	carbonyl reductase 3	Multiple_Complex
TC2200008734.hg.1	8.73	9.82	-2.13	3.21e-06	3.39e-05	CBX7	chromobox homolog 7	Multiple_Complex
TC1900007150.hg.1	6.22	7.48	-2.4	1.96e-06	2.18e-05	CC2D1A	coiled-coil and C2 domain containing 1A	Multiple_Complex
TC0400008380.hg.1	10.37	9.19	2.26	3.2e-11	8.35e-10	CCDC109B	coiled-coil domain containing 109B	Multiple_Complex
TC0300010966.hg.1	10.1	11.21	-2.16	0.0004	0.0023	CCDC12	coiled-coil domain containing 12	Multiple_Complex
TC0700009065.hg.1	4.93	6.24	-2.48	3.82e-06	3.96e-05	CCDC136	coiled-coil domain containing 136	Multiple_Complex
TC0300012216.hg.1	8.77	10.19	-2.67	9.55e-09	1.68e-07	CCDC14	coiled-coil domain containing 14	Multiple_Complex
TC0700013394.hg.1	7.11	8.69	-2.99	1.9e-07	2.65e-06	CCDC146	coiled-coil domain containing 146	Multiple_Complex
TC0600011697.hg.1	7.29	8.29	-2.01	0.0001	0.0007	CCDC167	coiled-coil domain containing 167	Coding
TC0300009866.hg.1	3.96	5.11	-2.21	2.95e-08	4.73e-07	CCDC50	coiled-coil domain containing 50	Multiple_Complex
TC0300012186.hg.1	10.9	9.84	2.09	9.43e-05	0.0007	CCDC58	coiled-coil domain containing 58	Multiple_Complex
TC1200009111.hg.1	11.79	9.63	4.46	7.59e-13	2.48e-11	CCDC64	coiled-coil domain containing 64	Multiple_Complex
TC1200007536.hg.1	5.34	6.72	-2.6	2.98e-07	3.98e-06	CCDC65	coiled-coil domain containing 65	Multiple_Complex
TC1000007226.hg.1	9.43	10.57	-2.2	5.59e-10	1.22e-08	CCDC7	coiled-coil domain containing 7	Multiple_Complex
TSUnmapped00000725.hg.1	5.15	6.57	-2.67	7.26e-05	0.0005	CCDC84	coiled-coil domain containing 84	NonCoding
TSUnmapped00000313.hg.1	8.49	9.66	-2.25	0.0069	0.0244	CCDC84	coiled-coil domain containing 84	NonCoding
TSUnmapped00000104.hg.1	9.69	10.76	-2.1	0.003	0.0124	CCDC84	coiled-coil domain containing 84	Coding
TSUnmapped00000747.hg.1	5.66	6.71	-2.06	0.0078	0.027	CCDC84	coiled-coil domain containing 84	NonCoding
TSUnmapped00000268.hg.1	7.35	8.39	-2.05	0.0009	0.0044	CCDC84	coiled-coil domain containing 84	NonCoding
TSUnmapped00000045.hg.1	8.72	9.74	-2.02	0.0059	0.0217	CCDC84	coiled-coil domain containing 84	Coding
TC1700010459.hg.1	5.5	7.83	-5.01	1.79e-07	2.52e-06	CCL3	chemokine (C-C motif) ligand 3	Multiple_Complex
TC1700010461.hg.1	4.97	7.32	-5.08	6.56e-11	1.64e-09	CCL3L3; CCL3L1	chemokine (C-C motif) ligand 3-like 3; chemokine (C-C motif) ligand 3-like 1	Multiple_Complex
TC1700007620.hg.1	5.46	10.9	-43.63	1.38e-31	5.11e-29	CCL4L2; CCL4; CCL4L1	chemokine (C-C motif) ligand 4-like 2; chemokine (C-C motif) ligand 4; chemokine (C-C motif) ligand 4-like 1	Multiple_Complex
TC1700007626.hg.1	5.97	8.93	-7.76	3.61e-14	1.44e-12	CCL4L2; CCL4L1	chemokine (C-C motif) ligand 4-like 2; chemokine (C-C motif) ligand 4-like 1	Multiple_Complex
TC1700010447.hg.1	7.79	13.8	-64.72	2.33e-36	1.47e-33	CCL5	chemokine (C-C motif) ligand 5	Coding
TC0600011809.hg.1	14.27	13.09	2.27	8.54e-10	1.8e-08	CCND3	cyclin D3	Multiple_Complex
TC1900007688.hg.1	6.65	5.05	3.04	3.19e-11	8.32e-10	CCNE1	cyclin E1	Multiple_Complex
TC0300007257.hg.1	5.23	9.03	-13.95	8.59e-23	1.11e-20	CCR5	chemokine (C-C motif) receptor 5 (gene/pseudogene)	Multiple_Complex
TC1700010630.hg.1	18.23	11.19	132.08	2.23e-43	4.79e-40	CCR7	chemokine (C-C motif) receptor 7	Coding
TC0200012755.hg.1	10.92	9.74	2.27	4.08e-11	1.05e-09	CCT4	chaperonin containing TCP1, subunit 4 (delta)	Multiple_Complex
TC1100006494.hg.1	4.65	5.71	-2.09	0.0066	0.0236	CD151	CD151 molecule (Raph blood group)	Multiple_Complex
TC0100009742.hg.1	4.23	5.96	-3.32	3.69e-09	6.93e-08	CD160	CD160 molecule	Multiple_Complex
TC1800008977.hg.1	6.73	9.67	-7.67	6.19e-11	1.55e-09	CD226	CD226 molecule	Multiple_Complex
TC0100016145.hg.1	4.66	8.99	-20.19	8.6e-34	4.29e-31	CD244	CD244 molecule, natural killer cell receptor 2B4	Multiple_Complex
TC1100011282.hg.1	10.57	5.08	45.13	3.21e-43	6.27e-40	CD248	CD248 molecule, endosialin	Coding
TC1200012583.hg.1	11.27	7.5	13.59	2.09e-28	4.87e-26	CD27	CD27 molecule	Multiple_Complex
TC0200010523.hg.1	10.38	7.59	6.9	9.56e-18	5.92e-16	CD28	CD28 molecule	Coding
TC1700008852.hg.1	7.26	11.24	-15.77	4.77e-21	4.96e-19	CD300A	CD300a molecule	Multiple_Complex
TC1100009202.hg.1	10.37	11.87	-2.83	1.23e-10	2.98e-09	CD3G	CD3g molecule, gamma (CD3-TCR complex)	Multiple_Complex
TC0100011406.hg.1	15.12	11.87	9.49	9.26e-35	5.09e-32	CD55	CD55 molecule, decay accelerating factor for complement (Cromer blood group)	Multiple_Complex
TC0100015397.hg.1	8.45	11.8	-10.19	4.23e-27	8.17e-25	CD58	CD58 molecule	Multiple_Complex
TC1100013161.hg.1	8.73	7.5	2.34	4.43e-08	6.92e-07	CD59	CD59 molecule, complement regulatory protein	Multiple_Complex
TC1200010866.hg.1	12.76	14.58	-3.54	3.73e-15	1.73e-13	CD63	CD63 molecule	Multiple_Complex
TC1700012109.hg.1	14.54	13.05	2.81	5.59e-13	1.86e-11	CD7	CD7 molecule	Multiple_Complex
TC1900009439.hg.1	4.32	6.55	-4.7	2.19e-16	1.16e-14	CD70	CD70 molecule	Multiple_Complex
TC0900009944.hg.1	4.69	7.13	-5.43	2.5e-13	8.75e-12	CD72	CD72 molecule	Multiple_Complex
TC0500012470.hg.1	12.3	13.77	-2.77	1.11e-12	3.57e-11	CD74	CD74 molecule, major histocompatibility complex, class II invariant chain	Multiple_Complex
TC1900008166.hg.1	7	5.96	2.06	1.64e-10	3.87e-09	CD79A	CD79a molecule, immunoglobulin-associated alpha	Multiple_Complex
TC1700011430.hg.1	7.38	6.33	2.06	7.01e-06	6.74e-05	CD79B	CD79b molecule, immunoglobulin-associated beta	Multiple_Complex
TC1100006576.hg.1	8.5	10.08	-3	1.82e-12	5.67e-11	CD81	CD81 molecule	Multiple_Complex
TC0100016137.hg.1	8.37	10.73	-5.14	3.96e-14	1.56e-12	CD84	CD84 molecule	Multiple_Complex
TC0200013323.hg.1	10.61	12.65	-4.1	6.49e-16	3.28e-14	CD8A	CD8a molecule	Multiple_Complex
TC0Y00006476.hg.1	11.93	13.83	-3.73	2.53e-22	3.14e-20	CD99	Homo sapiens CD99 molecule (CD99), transcript variant 2, mRNA.; Homo sapiens CD99 molecule (CD99), transcript variant 3, mRNA.; Homo sapiens CD99 molecule (CD99), transcript variant 1, mRNA.; CD99 molecule [Source:HGNC Symbol;Acc:HGNC:7082]; Homo sapiens CD99 molecule, mRNA (cDNA clone MGC:2282 IMAGE:3161673), complete cds.; Homo sapiens CD99 molecule, mRNA (cDNA clone MGC:3938 IMAGE:2906143), co…	Multiple_Complex
TC0X00006477.hg.1	12.34	14.13	-3.45	1.93e-21	2.14e-19	CD99	CD99 molecule	Multiple_Complex
TC1500009199.hg.1	5.79	6.86	-2.1	1.33e-05	0.0001	CDAN1	codanin 1	Multiple_Complex
TC0900012256.hg.1	6.07	8.86	-6.9	2.34e-15	1.11e-13	CDC14B	cell division cycle 14B	Multiple_Complex
TC1300008171.hg.1	8.79	9.87	-2.1	6.3e-08	9.53e-07	CDC16	cell division cycle 16	Multiple_Complex
TC1400010289.hg.1	6.21	4.65	2.94	1.06e-08	1.86e-07	CDC42BPB	CDC42 binding protein kinase beta (DMPK-like)	Multiple_Complex
TC0200016648.hg.1	8.4	9.82	-2.67	1.53e-15	7.39e-14	CDC42EP3	CDC42 effector protein (Rho GTPase binding) 3	Coding
TC0200016649.hg.1	8.1	5.63	5.55	0.0087	0.0294	CDC42EP3	CDC42 effector protein (Rho GTPase binding) 3	NonCoding
TC0500013227.hg.1	11.2	12.45	-2.38	0.0003	0.0017	CDC42SE2	CDC42 small effector 2	NonCoding
TC0100009020.hg.1	6.75	8.26	-2.85	9.42e-09	1.66e-07	CDC7	cell division cycle 7	Multiple_Complex
TC0200009994.hg.1	3.68	5.47	-3.46	9.11e-11	2.23e-09	CDCA7	cell division cycle associated 7	Multiple_Complex
TC0700010435.hg.1	9.34	5.94	10.55	1.61e-25	2.82e-23	CDCA7L	cell division cycle associated 7-like	Multiple_Complex
TC1600011448.hg.1	7.02	8.02	-2.01	0.0002	0.0011	CDK10	cyclin-dependent kinase 10	Multiple_Complex
TC0100018387.hg.1	8.82	9.96	-2.21	1.91e-05	0.0002	CDK11B	cyclin-dependent kinase 11B	Multiple_Complex
TC0X00007132.hg.1	7	8.27	-2.4	5.45e-05	0.0004	CDK16	cyclin-dependent kinase 16	Multiple_Complex
TC1700012277.hg.1	6.07	7.4	-2.51	1.36e-05	0.0001	CDK5RAP3	CDK5 regulatory subunit associated protein 3	Multiple_Complex
TC1400009128.hg.1	6.3	7.66	-2.57	1.23e-09	2.52e-08	CDKL1	cyclin-dependent kinase-like 1 (CDC2-related kinase)	Multiple_Complex
TC0900012219.hg.1	4.53	6.94	-5.33	8.01e-16	4.02e-14	CDKN2A	cyclin-dependent kinase inhibitor 2A	Multiple_Complex
TC1600011508.hg.1	7.93	6.39	2.91	2.92e-10	6.67e-09	CDR2	cerebellar degeneration related protein 2	Multiple_Complex
TC1000006768.hg.1	12.23	14.09	-3.62	1.21e-06	1.42e-05	CELF2	Transcript Identified by AceView, Entrez Gene ID(s) 10659	Unassigned
TC1000006754.hg.1	13.48	15.2	-3.29	1.06e-12	3.4e-11	CELF2	CUGBP, Elav-like family member 2	Multiple_Complex
TC1600010656.hg.1	6.65	8.41	-3.37	7.85e-09	1.41e-07	CENPT	centromere protein T	Multiple_Complex
TC1100008899.hg.1	5.08	6.08	-2	4.45e-06	4.52e-05	CEP126	centrosomal protein 126kDa	Coding
TC1400009829.hg.1	4.47	5.86	-2.62	1.01e-06	1.2e-05	CEP128	centrosomal protein 128kDa	Multiple_Complex
TC1500009353.hg.1	6.63	7.69	-2.08	1.23e-05	0.0001	CEP152	centrosomal protein 152kDa	Multiple_Complex
TC1100009175.hg.1	7.29	8.57	-2.42	4.81e-09	8.89e-08	CEP164	centrosomal protein 164kDa	Multiple_Complex
TC0300013719.hg.1	8.02	6.52	2.81	4.1e-08	6.45e-07	CEP19	centrosomal protein 19kDa	Multiple_Complex
TC0600009080.hg.1	5.56	6.62	-2.08	2.68e-05	0.0002	CEP57L1	centrosomal protein 57kDa-like 1	Multiple_Complex
TC0900007663.hg.1	7.16	9.1	-3.82	4.75e-11	1.21e-09	CEP78	centrosomal protein 78kDa	Multiple_Complex
TC0900008865.hg.1	5.92	7.02	-2.15	1.37e-06	1.59e-05	CERCAM	cerebral endothelial cell adhesion molecule	Multiple_Complex
TC0200009895.hg.1	10.01	5.8	18.52	3.25e-28	7.34e-26	CERS6	ceramide synthase 6	Multiple_Complex
TC0200007636.hg.1	10.55	9.24	2.49	5.91e-07	7.38e-06	CFAP36	cilia and flagella associated protein 36	Multiple_Complex
TC0100011064.hg.1	4.57	6.22	-3.13	1.72e-11	4.66e-10	CFH	complement factor H	Multiple_Complex
TC0200010443.hg.1	13.59	16.06	-5.54	8.64e-22	1.01e-19	CFLAR	CASP8 and FADD like apoptosis regulator	Multiple_Complex
TC0800007697.hg.1	11.94	10.56	2.6	1.78e-11	4.8e-10	CHCHD7	coiled-coil-helix-coiled-coil-helix domain containing 7	Multiple_Complex
TC1600007874.hg.1	7.95	9.17	-2.33	4.88e-08	7.58e-07	CHD9	chromodomain helicase DNA binding protein 9	Multiple_Complex
TC2200009365.hg.1	9.33	10.72	-2.63	6.97e-06	6.72e-05	CHKB	choline kinase beta	Multiple_Complex
TC0800007013.hg.1	9.67	7.27	5.28	1.58e-20	1.54e-18	CHMP7	charged multivesicular body protein 7	Multiple_Complex
TC1500010841.hg.1	4.99	6.46	-2.76	4.2e-10	9.33e-09	CHRFAM7A	CHRNA7 (cholinergic receptor, nicotinic, alpha 7, exons 5-10) and FAM7A (family with sequence similarity 7A, exons A-E) fusion	Multiple_Complex
TC0800010297.hg.1	5.38	3.75	3.11	1.52e-10	3.62e-09	CHRNA6	cholinergic receptor, nicotinic alpha 6	Multiple_Complex
TC1200008683.hg.1	9.41	12.21	-6.95	2.01e-17	1.21e-15	CHST11	carbohydrate (chondroitin 4) sulfotransferase 11	Multiple_Complex
TC1200008685.hg.1	5.15	7.07	-3.77	3.95e-10	8.85e-09	CHST11	Transcript Identified by AceView, Entrez Gene ID(s) 50515	Unassigned
TC1200008686.hg.1	6.3	8.13	-3.56	1.15e-11	3.21e-10	CHST11	Transcript Identified by AceView, Entrez Gene ID(s) 50515	Unassigned
TC0700013327.hg.1	7.78	10.86	-8.45	1.62e-24	2.59e-22	CHST12	carbohydrate (chondroitin 4) sulfotransferase 12	Coding
TC0700013328.hg.1	4.55	6.15	-3.03	8.56e-12	2.45e-10	CHST12	carbohydrate (chondroitin 4) sulfotransferase 12	NonCoding
TC0100009900.hg.1	6.88	4.64	4.71	5.47e-13	1.82e-11	CIART	circadian associated repressor of transcription	Multiple_Complex
TC1400008752.hg.1	9.7	11.79	-4.24	1.63e-20	1.58e-18	CIDEB	cell death-inducing DFFA-like effector b	Multiple_Complex
TC1600006888.hg.1	5.91	8.92	-8.04	9e-22	1.04e-19	CIITA	class II, major histocompatibility complex, transactivator	Multiple_Complex
TC1900006524.hg.1	12.76	11.47	2.44	7.98e-07	9.68e-06	CIRBP	cold inducible RNA binding protein	Multiple_Complex
TC1100010713.hg.1	8	9.05	-2.06	4.09e-07	5.32e-06	CKAP5; SNORD67	cytoskeleton associated protein 5; small nucleolar RNA, C/D box 67	Multiple_Complex
TC0100010100.hg.1	10.06	8.43	3.11	5.49e-09	1.01e-07	CKS1B	CDC28 protein kinase regulatory subunit 1B	Multiple_Complex
TC0200014091.hg.1	10.09	11.24	-2.23	5.97e-07	7.45e-06	CLASP1	cytoplasmic linker associated protein 1	Multiple_Complex
TC1900008303.hg.1	8.42	9.63	-2.31	3.08e-05	0.0002	CLASRP	CLK4-associating serine/arginine rich protein	Multiple_Complex
TC1100013192.hg.1	4.63	6.5	-3.65	1.55e-15	7.47e-14	CLCF1	cardiotrophin-like cytokine factor 1	Coding
TC1900012017.hg.1	6.52	8.49	-3.93	1.5e-19	1.24e-17	CLDND2	claudin domain containing 2	Coding
TC1200009881.hg.1	14.36	15.43	-2.11	3.05e-09	5.81e-08	CLEC2B	C-type lectin domain family 2, member B	Multiple_Complex
TC0600014265.hg.1	11.91	13.27	-2.57	1.53e-10	3.63e-09	CLIC1	chloride intracellular channel 1	Coding
TC0900012024.hg.1	4.73	6.54	-3.49	1.5e-09	3e-08	CLIC3	chloride intracellular channel 3	Multiple_Complex
TC2100006997.hg.1	6.22	5.02	2.3	6.96e-10	1.49e-08	CLIC6	chloride intracellular channel 6	Coding
TC1200012234.hg.1	6.81	8.24	-2.68	2.52e-14	1.03e-12	CLIP1	CAP-GLY domain containing linker protein 1	Multiple_Complex
TC1300007549.hg.1	9.65	6.42	9.41	3.42e-28	7.64e-26	CLN5	ceroid-lipofuscinosis, neuronal 5	Multiple_Complex
TC1100011719.hg.1	14.28	12.74	2.89	1.8e-19	1.47e-17	CLNS1A	chloride channel, nucleotide-sensitive, 1A	Multiple_Complex
TC1200006670.hg.1	8.91	10.71	-3.5	5.56e-23	7.32e-21	CLSTN3	calsyntenin 3	Multiple_Complex
TC1600011343.hg.1	6.99	5.21	3.43	1.42e-11	3.91e-10	CLUAP1	clusterin associated protein 1	Multiple_Complex
TC0300006894.hg.1	9.9	14.96	-33.31	1.88e-31	6.49e-29	CMC1	C-x(9)-C motif containing 1	Multiple_Complex
TC1600008585.hg.1	12.3	14.26	-3.87	4.89e-11	1.24e-09	CMIP	c-Maf inducing protein	Multiple_Complex
TC1200011838.hg.1	4.33	6.67	-5.07	7.04e-10	1.5e-08	CMKLR1	chemerin chemokine-like receptor 1	Multiple_Complex
TC1600011407.hg.1	6.97	8.54	-2.95	1.57e-13	5.66e-12	CMTM1	CKLF-like MARVEL transmembrane domain containing 1	Coding
TC0300006961.hg.1	7.14	4.86	4.84	9.26e-14	3.45e-12	CMTM8	CKLF-like MARVEL transmembrane domain containing 8	Coding
TC2000009912.hg.1	5.42	6.65	-2.35	2.33e-06	2.55e-05	CNBD2	cyclic nucleotide binding domain containing 2	Coding
TC0X00006758.hg.1	9.11	5.75	10.3	1.74e-27	3.52e-25	CNKSR2	connector enhancer of kinase suppressor of Ras 2	Multiple_Complex
TC0100014995.hg.1	8.05	3.87	18.19	1.84e-29	4.99e-27	CNN3	calponin 3, acidic	Multiple_Complex
TC0200016496.hg.1	7	8.42	-2.69	3.62e-07	4.77e-06	CNNM3	cyclin and CBS domain divalent metal cation transport mediator 3	Multiple_Complex
TC0700008524.hg.1	9.66	8.63	2.04	0.0007	0.0037	CNPY4	canopy FGF signaling regulator 4	Multiple_Complex
TC1600009731.hg.1	9.1	10.22	-2.17	0.0002	0.0011	COG7	component of oligomeric golgi complex 7	Multiple_Complex
TC0100016664.hg.1	4.29	6.8	-5.69	9.91e-14	3.67e-12	COLGALT2	collagen beta(1-O)galactosyltransferase 2	Multiple_Complex
TC1700010973.hg.1	6.03	7.24	-2.31	3.75e-07	4.93e-06	COPZ2	coatomer protein complex subunit zeta 2	Multiple_Complex
TC1200011846.hg.1	6.55	7.88	-2.52	1.21e-06	1.41e-05	CORO1C	coronin, actin binding protein, 1C	Multiple_Complex
TC1600008709.hg.1	12.53	11.17	2.58	7.66e-12	2.21e-10	COX4I1	cytochrome c oxidase subunit IV isoform 1	Multiple_Complex
TC0400006930.hg.1	5.97	7.03	-2.08	3.67e-07	4.83e-06	CPEB2	cytoplasmic polyadenylation element binding protein 2	Multiple_Complex
TC1600007988.hg.1	8.28	6.24	4.09	3.62e-16	1.87e-14	CPNE2	copine II	Multiple_Complex
TC1200010397.hg.1	6.38	8.72	-5.06	6.25e-15	2.81e-13	CPNE8	copine VIII	Multiple_Complex
TC1600009446.hg.1	6.53	7.67	-2.2	1.8e-07	2.53e-06	CPPED1	calcineurin-like phosphoesterase domain containing 1	Multiple_Complex
TC0700012734.hg.1	6.93	8.68	-3.36	8.22e-14	3.09e-12	CREB3L2	cAMP responsive element binding protein 3-like 2	Multiple_Complex
TC1100011829.hg.1	10.04	11.17	-2.19	0.0002	0.0013	CREBZF	CREB/ATF bZIP transcription factor	Multiple_Complex
TC0200007237.hg.1	5.35	7.95	-6.09	3.43e-22	4.2e-20	CRIM1	cysteine rich transmembrane BMP regulator 1 (chordin-like)	Multiple_Complex
TC1400010704.hg.1	10.05	11.11	-2.08	2.75e-07	3.71e-06	CRIP1	cysteine-rich protein 1 (intestinal)	Multiple_Complex
TC0400006519.hg.1	8.27	9.94	-3.18	7.18e-06	6.89e-05	CRIPAK	cysteine-rich PAK1 inhibitor	Coding
TC1500008317.hg.1	11.19	9.53	3.14	1.69e-16	9.17e-15	CRTC3	CREB regulated transcription coactivator 3	Multiple_Complex
TC0300014084.hg.1	6.82	8.45	-3.1	0.0001	0.001	CRYGS	crystallin gamma S	Multiple_Complex
TC1300008253.hg.1	8.99	7.94	2.07	3.02e-06	3.21e-05	CRYL1	crystallin lambda 1	Multiple_Complex
TC2000007005.hg.1	6.87	14.58	-209.02	4.76e-44	1.45e-40	CST7	cystatin F (leukocystatin)	Coding
TC0500008794.hg.1	3.57	5.22	-3.14	9.76e-07	1.16e-05	CTNNA1	catenin (cadherin-associated protein), alpha 1	Multiple_Complex
TC1100011888.hg.1	7.63	9.55	-3.78	2.42e-19	1.91e-17	CTSC	cathepsin C	Multiple_Complex
TC1100008041.hg.1	6.53	7.94	-2.66	1.3e-08	2.23e-07	CTSW	cathepsin W	Multiple_Complex
TC0300010775.hg.1	3.66	8.96	-39.35	4.05e-25	6.84e-23	CX3CR1	chemokine (C-X3-C motif) receptor 1	Coding
TC1700009528.hg.1	8.57	6.44	4.4	1.36e-11	3.76e-10	CXCL16	chemokine (C-X-C motif) ligand 16	Multiple_Complex
TC0X00010005.hg.1	8.58	10.03	-2.71	1.5e-09	3e-08	CXCR3	chemokine (C-X-C motif) receptor 3	Coding
TC0300007251.hg.1	5.99	8.35	-5.13	1.79e-17	1.08e-15	CXCR6	chemokine (C-X-C motif) receptor 6	Multiple_Complex
TC0X00009328.hg.1	6.97	5.45	2.86	6.81e-09	1.23e-07	CXorf21	chromosome X open reading frame 21	Coding
TC0X00009980.hg.1	10.33	11.58	-2.38	0.0033	0.0133	CXorf65	chromosome X open reading frame 65	Multiple_Complex
TC1800009029.hg.1	12.66	11.05	3.06	2.47e-10	5.72e-09	CYB5A	cytochrome b5 type A (microsomal)	Multiple_Complex
TC1600011220.hg.1	12.92	14.43	-2.86	1.69e-19	1.39e-17	CYBA	cytochrome b-245, alpha polypeptide	Multiple_Complex
TC1700012476.hg.1	5.83	4.59	2.36	4.22e-11	1.08e-09	CYGB	cytoglobin	Multiple_Complex
TC1700012477.hg.1	7.41	6.39	2.02	0.0003	0.0019	CYGB; RP11-666A8.8	Transcript Identified by AceView, Entrez Gene ID(s) 114757; novel transcript, antisense to PRCD	Multiple_Complex
TC0100014365.hg.1	5.61	3.85	3.38	6.48e-15	2.89e-13	CYP2J2	cytochrome P450, family 2, subfamily J, polypeptide 2	Multiple_Complex
TC1900007233.hg.1	4.74	5.77	-2.04	1.74e-06	1.96e-05	CYP4F22	cytochrome P450, family 4, subfamily F, polypeptide 22	Coding
TC0400012874.hg.1	6.66	7.86	-2.3	0.0006	0.003	CYP4V2	cytochrome P450, family 4, subfamily V, polypeptide 2	Multiple_Complex
TC0700010189.hg.1	6.14	9.72	-11.96	8.52e-19	6.21e-17	CYTH3	cytohesin 3	Multiple_Complex
TC0200014693.hg.1	12.45	11.39	2.09	1.56e-06	1.78e-05	CYTIP	cytohesin 1 interacting protein	Multiple_Complex
TC1400007328.hg.1	6.58	8.27	-3.22	4.31e-12	1.29e-10	DAAM1	dishevelled associated activator of morphogenesis 1	Multiple_Complex
TC0400008240.hg.1	5.52	4.31	2.31	7.69e-07	9.34e-06	DAPP1	dual adaptor of phosphotyrosine and 3-phosphoinositides	Multiple_Complex
TC0300011815.hg.1	5.6	4.48	2.18	1.42e-06	1.63e-05	DCBLD2	discoidin, CUB and LCCL domain containing 2	Multiple_Complex
TC1200009590.hg.1	9.69	11.64	-3.85	1.07e-18	7.77e-17	DCP1B	decapping mRNA 1B	Multiple_Complex
TC0800012288.hg.1	11.66	10.4	2.4	4.15e-06	4.26e-05	DCTN6	dynactin 6	Multiple_Complex
TC0500013228.hg.1	7.88	8.89	-2.01	7.28e-05	0.0005	DDX46	DEAD (Asp-Glu-Ala-Asp) box polypeptide 46	Multiple_Complex
TC1100009689.hg.1	7.35	6.04	2.46	1.61e-07	2.28e-06	DEAF1	DEAF1 transcription factor	Multiple_Complex
TC0100016839.hg.1	6.37	8.38	-4.03	1.62e-13	5.81e-12	DENND1B	DENN/MADD domain containing 1B	Multiple_Complex
TC0800009094.hg.1	6.59	9.36	-6.81	8.36e-19	6.12e-17	DENND3	DENN/MADD domain containing 3	Multiple_Complex
TC1100010058.hg.1	8.12	6.12	4	2.12e-14	8.77e-13	DENND5A	DENN/MADD domain containing 5A	Multiple_Complex
TC2200007109.hg.1	6.24	7.42	-2.27	4.55e-06	4.6e-05	DEPDC5	DEP domain containing 5	Multiple_Complex
TC1100007220.hg.1	6.6	5.32	2.43	4.91e-07	6.26e-06	DEPDC7	DEP domain containing 7	Multiple_Complex
TC0900011286.hg.1	6.63	8.83	-4.59	1.46e-13	5.33e-12	DFNB31	deafness, autosomal recessive 31	Multiple_Complex
TC2200006637.hg.1	6.61	7.81	-2.3	5.78e-05	0.0004	DGCR8	Memczak2013 ALT_ACCEPTOR, ALT_DONOR, coding, INTERNAL, intronic best transcript NM_022720	NonCoding
TC2200006636.hg.1	7.91	8.94	-2.04	3.02e-06	3.21e-05	DGCR8; MIR1306; MIR3618	DGCR8 microprocessor complex subunit; microRNA 1306; microRNA 3618	Multiple_Complex
TSUnmapped00000513.hg.1	6.2	8.28	-4.24	7.5e-07	9.15e-06	DGKD	diacylglycerol kinase, delta 130kDa	NonCoding
TSUnmapped00000328.hg.1	6.28	7.73	-2.73	2.9e-07	3.89e-06	DGKD	diacylglycerol kinase, delta 130kDa	NonCoding
TC0200011130.hg.1	8.33	9.65	-2.5	7.11e-06	6.83e-05	DGKD	diacylglycerol kinase, delta 130kDa	Multiple_Complex
TC1300008997.hg.1	9.45	8.04	2.65	8.47e-07	1.02e-05	DHRS12	dehydrogenase/reductase (SDR family) member 12	Multiple_Complex
TC0100012921.hg.1	10.34	6.95	10.47	2.49e-27	4.86e-25	DHRS3; MIR6730	dehydrogenase/reductase (SDR family) member 3; microRNA 6730	Multiple_Complex
TC0500012280.hg.1	9.22	10.64	-2.67	1.82e-11	4.92e-10	DIAPH1	diaphanous-related formin 1	Multiple_Complex
TC0X00007889.hg.1	8.1	9.63	-2.88	3.99e-12	1.2e-10	DIAPH2	diaphanous-related formin 2	Multiple_Complex
TC1300008938.hg.1	6.72	8.34	-3.07	1.47e-08	2.48e-07	DLEU2; MIR15A; MIR16-1; MIR3613	deleted in lymphocytic leukemia 2 (non-protein coding); microRNA 15a; microRNA 16-1; microRNA 3613	Multiple_Complex
TC0X00007540.hg.1	6.81	8.26	-2.73	2.28e-09	4.41e-08	DLG3	discs, large homolog 3 (Drosophila)	Multiple_Complex
TC1700009619.hg.1	7.66	6.39	2.41	8.74e-08	1.3e-06	DLG4	discs, large homolog 4 (Drosophila)	Multiple_Complex
TC0600014031.hg.1	7	5.27	3.33	1.22e-14	5.2e-13	DLL1	delta-like 1 (Drosophila)	Multiple_Complex
TC1900011984.hg.1	4.57	6.09	-2.87	5.32e-10	1.17e-08	DMPK	dystrophia myotonica-protein kinase	Multiple_Complex
TC0300007474.hg.1	9.01	10.05	-2.07	2.89e-06	3.09e-05	DNAH1	dynein, axonemal, heavy chain 1	Multiple_Complex
TC0200010840.hg.1	10.84	11.94	-2.14	0.0011	0.0053	DNAJB2	DnaJ (Hsp40) homolog, subfamily B, member 2	Multiple_Complex
TC0200016643.hg.1	9.94	7.96	3.93	2.3e-15	1.1e-13	DNMT3A	DNA (cytosine-5-)-methyltransferase 3 alpha	Multiple_Complex
TC0600011870.hg.1	13.08	10.38	6.49	8.13e-18	5.13e-16	DNPH1	2-deoxynucleoside 5-phosphate N-hydrolase 1	Multiple_Complex
TC0800007057.hg.1	5.19	6.26	-2.1	6.31e-06	6.14e-05	DOCK5	dedicator of cytokinesis 5	Multiple_Complex
TC1300009583.hg.1	11.3	9.34	3.9	1.21e-10	2.93e-09	DOCK9	dedicator of cytokinesis 9	Multiple_Complex
TC0800009819.hg.1	7.22	12.35	-35.06	1.49e-37	1.07e-34	DOK2	docking protein 2	Multiple_Complex
TC0100015082.hg.1	10.09	8.94	2.22	2.06e-15	9.82e-14	DPH5	diphthamide biosynthesis 5	Multiple_Complex
TC0200014764.hg.1	6.22	4.89	2.51	0.0003	0.0018	DPP4	dipeptidyl-peptidase 4	Multiple_Complex
TC1900009361.hg.1	9.37	10.51	-2.21	7.36e-07	9.01e-06	DPP9	dipeptidyl-peptidase 9	Multiple_Complex
TC0700010716.hg.1	6.6	8.3	-3.25	1.71e-11	4.66e-10	DPY19L1	dpy-19-like 1 (C. elegans)	Multiple_Complex
TC0800007086.hg.1	7.02	9.21	-4.56	2.52e-16	1.32e-14	DPYSL2	dihydropyrimidinase-like 2	Multiple_Complex
TC1800008387.hg.1	5.29	4.14	2.22	9.47e-09	1.67e-07	DSC1	desmocollin 1	Coding
TC0400007225.hg.1	4.88	9.99	-34.46	3.08e-31	1.02e-28	DTHD1	death domain containing 1	Multiple_Complex
TC0100017420.hg.1	8.34	10.96	-6.14	2.2e-21	2.42e-19	DUSP10	dual specificity phosphatase 10	Multiple_Complex
TC0200013511.hg.1	8.88	12.33	-10.92	5.69e-22	6.78e-20	DUSP2	dual specificity phosphatase 2	Multiple_Complex
TC0600006441.hg.1	8.33	9.8	-2.75	3.05e-08	4.88e-07	DUSP22	dual specificity phosphatase 22	Multiple_Complex
TC0800010002.hg.1	6.74	10.02	-9.67	3.07e-14	1.23e-12	DUSP4	dual specificity phosphatase 4	Multiple_Complex
TC1000008891.hg.1	6.54	9.14	-6.08	4.83e-18	3.15e-16	DUSP5	dual specificity phosphatase 5	Multiple_Complex
TC0300009692.hg.1	6.7	8.01	-2.48	4.02e-07	5.24e-06	DVL3	dishevelled segment polarity protein 3	Multiple_Complex
TC1100008927.hg.1	4.88	6.77	-3.68	1.87e-07	2.61e-06	DYNC2H1	dynein, cytoplasmic 2, heavy chain 1	Multiple_Complex
TC0X00009384.hg.1	8.31	7.05	2.41	6.21e-06	6.06e-05	DYNLT3	dynein, light chain, Tctex-type 3	Coding
TSUnmapped00000019.hg.1	5.55	6.94	-2.62	2.02e-09	3.96e-08	DYRK1B	dual specificity tyrosine-(Y)-phosphorylation regulated kinase 1B	Coding
TC1500010870.hg.1	5.16	4.03	2.19	1.96e-08	3.23e-07	DYX1C1	dyslexia susceptibility 1 candidate 1	Multiple_Complex
TC0600007138.hg.1	6.85	8.08	-2.34	1.15e-11	3.2e-10	E2F3	E2F transcription factor 3	Multiple_Complex
TC0300006714.hg.1	6.02	7.72	-3.25	2.29e-13	8.06e-12	EAF1	ELL associated factor 1	Multiple_Complex
TC0200013815.hg.1	4.86	3.82	2.06	2.12e-09	4.14e-08	EDAR	ectodysplasin A receptor	Coding
TC0100012093.hg.1	5.08	6.26	-2.26	8.87e-08	1.32e-06	EDARADD	EDAR-associated death domain	Multiple_Complex
TC0200010567.hg.1	14.08	11.97	4.33	2.01e-14	8.34e-13	EEF1B2; SNORA41	eukaryotic translation elongation factor 1 beta 2; small nucleolar RNA, H/ACA box 41	Multiple_Complex
TC1900009316.hg.1	17.44	16.26	2.27	1.52e-09	3.03e-08	EEF2; SNORD37	eukaryotic translation elongation factor 2; small nucleolar RNA, C/D box 37	Multiple_Complex
TC0X00009493.hg.1	5.2	4.16	2.06	3.75e-06	3.89e-05	EFHC2	EF-hand domain (C-terminal) containing 2	Multiple_Complex
TC0100006982.hg.1	7.48	11.82	-20.25	4.22e-33	1.95e-30	EFHD2	EF-hand domain family member D2	Coding
TC0500011648.hg.1	3.82	6.28	-5.5	6.88e-13	2.25e-11	EFNA5	ephrin-A5	Multiple_Complex
TC1900011736.hg.1	11.19	10.18	2.02	5.25e-07	6.64e-06	EGLN2	egl-9 family hypoxia-inducible factor 2	Multiple_Complex
TC1400010731.hg.1	7.49	4.69	6.99	2.07e-14	8.59e-13	EGLN3	egl-9 family hypoxia-inducible factor 3	NonCoding
TC1500007174.hg.1	9.32	10.66	-2.53	1.17e-09	2.42e-08	EID1	EP300 interacting inhibitor of differentiation 1	Multiple_Complex
TC0300007115.hg.1	9.55	8.51	2.04	1.56e-06	1.78e-05	EIF1B	eukaryotic translation initiation factor 1B	Multiple_Complex
TC0100017100.hg.1	10.87	9.34	2.87	2.2e-17	1.31e-15	EIF2D	eukaryotic translation initiation factor 2D	Multiple_Complex
TC2000008910.hg.1	6.8	7.92	-2.17	0.0003	0.0017	EIF2S2	Zhang2013 ALT_ACCEPTOR, ALT_DONOR, coding, INTERNAL, intronic best transcript NM_003908	NonCoding
TC0800012451.hg.1	14.18	12.27	3.76	2.52e-15	1.19e-13	EIF3E	eukaryotic translation initiation factor 3, subunit E	Multiple_Complex
TC0800011561.hg.1	14.48	13.35	2.19	1.64e-10	3.87e-09	EIF3H	eukaryotic translation initiation factor 3, subunit H	Multiple_Complex
TC2200009262.hg.1	11.06	9.95	2.16	3.45e-09	6.51e-08	EIF3L	eukaryotic translation initiation factor 3, subunit L	Multiple_Complex
TC0300011516.hg.1	10.36	11.64	-2.44	1.24e-07	1.8e-06	EIF4E3	eukaryotic translation initiation factor 4E family member 3	Multiple_Complex
TC0800007316.hg.1	6.66	7.95	-2.43	2.08e-06	2.31e-05	EIF4EBP1	eukaryotic translation initiation factor 4E binding protein 1	Multiple_Complex
TC1000007925.hg.1	11.99	13.74	-3.35	1.07e-14	4.59e-13	EIF4EBP2	eukaryotic translation initiation factor 4E binding protein 2	Multiple_Complex
TC0100013194.hg.1	7.91	9.9	-3.99	1.28e-17	7.82e-16	EIF4G3	eukaryotic translation initiation factor 4 gamma, 3	Multiple_Complex
TC0X00010799.hg.1	7.39	8.93	-2.9	4.8e-11	1.22e-09	ELF4	E74-like factor 4 (ets domain transcription factor)	Multiple_Complex
TC1900010017.hg.1	6.81	8.22	-2.65	1.71e-12	5.37e-11	ELL	elongation factor RNA polymerase II	Multiple_Complex
TC0400012956.hg.1	4.87	6.09	-2.33	1.33e-05	0.0001	ELOVL6	ELOVL fatty acid elongase 6	Multiple_Complex
TC1600006566.hg.1	6.47	8.02	-2.93	1.92e-07	2.67e-06	EME2	essential meiotic structure-specific endonuclease subunit 2	Multiple_Complex
TC1900008337.hg.1	7	8.59	-3.02	8.2e-09	1.46e-07	EML2-AS1	EML2 antisense RNA 1	Multiple_Complex
TC0200007353.hg.1	13.52	15.35	-3.54	1.79e-11	4.84e-10	EML4	echinoderm microtubule associated protein like 4	Multiple_Complex
TC0500011146.hg.1	4.41	6.59	-4.54	1.96e-17	1.17e-15	ENC1	ectodermal-neural cortex 1 (with BTB domain)	Multiple_Complex
TC0600008156.hg.1	6.92	8.43	-2.84	2.91e-11	7.65e-10	ENPP4	ectonucleotide pyrophosphatase/phosphodiesterase 4 (putative)	Coding
TC0600011943.hg.1	5.71	8.7	-7.93	5.58e-18	3.61e-16	ENPP5	ectonucleotide pyrophosphatase/phosphodiesterase 5 (putative)	Multiple_Complex
TC0300010566.hg.1	7.02	13.08	-66.61	1.24e-38	1.11e-35	EOMES	eomesodermin	Coding
TC2200007457.hg.1	10.26	11.32	-2.08	1.38e-05	0.0001	EP300; MIR1281	E1A binding protein p300; microRNA 1281	Multiple_Complex
TC1200009461.hg.1	8.92	10.1	-2.26	0.0002	0.0012	EP400; SNORA49	E1A binding protein p400; small nucleolar RNA, H/ACA box 49	Multiple_Complex
TC0600013165.hg.1	10.32	8.51	3.48	3.41e-11	8.83e-10	EPB41L2	erythrocyte membrane protein band 4.1-like 2	Multiple_Complex
TC0500011712.hg.1	4.7	6.57	-3.64	9.73e-15	4.23e-13	EPB41L4A	erythrocyte membrane protein band 4.1 like 4A	Multiple_Complex
TC0800007110.hg.1	7.32	4.8	5.76	4.03e-18	2.68e-16	EPHX2	epoxide hydrolase 2, cytoplasmic	Multiple_Complex
TC1700012207.hg.1	4.84	6.42	-3	9.3e-09	1.64e-07	EPN2; EPN2-IT1	epsin 2; EPN2 intronic transcript 1	Multiple_Complex
TC0100014175.hg.1	7.06	9.59	-5.78	4.31e-20	3.96e-18	EPS15	epidermal growth factor receptor pathway substrate 15	Multiple_Complex
TC1000010602.hg.1	7.48	8.53	-2.07	8.72e-05	0.0006	ERCC6; ERCC6-PGBD3; PGBD3	excision repair cross-complementation group 6; ERCC6-PGBD3 readthrough; piggyBac transposable element derived 3	Multiple_Complex
TC0800009331.hg.1	14.38	12.59	3.45	2.39e-11	6.33e-10	ERICH1	glutamate rich 1	Multiple_Complex
TC1700011436.hg.1	7.66	10.8	-8.79	1.2e-25	2.11e-23	ERN1	endoplasmic reticulum to nucleus signaling 1	Multiple_Complex
TC0100018403.hg.1	4.36	5.42	-2.08	3.04e-05	0.0002	ERRFI1	ERBB receptor feedback inhibitor 1	Multiple_Complex
TC0700011318.hg.1	6.73	8.62	-3.7	2.95e-10	6.73e-09	ERV3-1; ZNF117	endogenous retrovirus group 3, member 1; zinc finger protein 117	Multiple_Complex
TC1300008855.hg.1	11.42	9.49	3.82	6.89e-17	3.92e-15	ESD	esterase D	Multiple_Complex
TC0400009132.hg.1	6.13	7.2	-2.1	1.69e-06	1.91e-05	ETFDH	electron-transferring-flavoprotein dehydrogenase	Multiple_Complex
TC0100017018.hg.1	7.08	5.97	2.15	9.52e-05	0.0007	ETNK2	ethanolamine kinase 2	Multiple_Complex
TC2100006922.hg.1	8.76	9.77	-2.01	2.27e-05	0.0002	EVA1C	eva-1 homolog C (C. elegans)	Multiple_Complex
TC2200007013.hg.1	10.28	11.31	-2.04	4.24e-07	5.49e-06	EWSR1	EWS RNA binding protein 1	Multiple_Complex
TC1900010746.hg.1	6.24	4.86	2.61	5.09e-08	7.84e-07	EXOSC5	exosome component 5	Multiple_Complex
TC0500007831.hg.1	6.62	9.53	-7.52	1.24e-28	3.08e-26	F2R	coagulation factor II (thrombin) receptor	Multiple_Complex
TC0500007834.hg.1	6.39	5.2	2.28	1.69e-09	3.36e-08	F2RL1	coagulation factor II (thrombin) receptor-like 1	Multiple_Complex
TC0500011194.hg.1	5.29	7.38	-4.26	1.71e-11	4.66e-10	F2RL2	coagulation factor II (thrombin) receptor-like 2	Coding
TC0X00011226.hg.1	4.56	6.23	-3.17	4.87e-09	8.98e-08	F8	coagulation factor VIII, procoagulant component	Multiple_Complex
TC0X00007416.hg.1	9.08	5.76	9.95	8.93e-24	1.3e-21	FAAH2	fatty acid amide hydrolase 2	Multiple_Complex
TC1100011050.hg.1	4.97	6.47	-2.83	1.16e-05	0.0001	FADS1; MIR1908	fatty acid desaturase 1; microRNA 1908	Multiple_Complex
TC1700009318.hg.1	8.28	7.24	2.05	9.53e-06	8.89e-05	FAM101B	family with sequence similarity 101, member B	Multiple_Complex
TC0900008836.hg.1	10.55	9.3	2.38	1.28e-07	1.85e-06	FAM102A	Memczak2013 ANTISENSE, CDS, coding, INTERNAL, intronic, UTR3 best transcript NM_203305	NonCoding
TC0900011613.hg.1	13.77	12.18	3	5.06e-08	7.81e-07	FAM102A	family with sequence similarity 102, member A	Multiple_Complex
TC1100007728.hg.1	9.28	10.89	-3.07	3.24e-08	5.16e-07	FAM111A	family with sequence similarity 111, member A	Multiple_Complex
TC1700011060.hg.1	9.11	10.22	-2.16	1.35e-06	1.56e-05	FAM117A	family with sequence similarity 117, member A	Multiple_Complex
TC0200010502.hg.1	12.85	10.67	4.53	2.45e-12	7.52e-11	FAM117B	family with sequence similarity 117, member B	Multiple_Complex
TC0100016678.hg.1	6.5	11.23	-26.48	1.59e-30	4.94e-28	FAM129A	family with sequence similarity 129, member A	Multiple_Complex
TC0500010199.hg.1	7.08	4.18	7.48	3.6e-23	4.91e-21	FAM134B	family with sequence similarity 134, member B	Multiple_Complex
TC0400011299.hg.1	6.72	8.23	-2.85	3.93e-09	7.36e-08	FAM13A	family with sequence similarity 13, member A	Multiple_Complex
TC0500012153.hg.1	7.19	8.28	-2.13	8.79e-06	8.25e-05	FAM13B	family with sequence similarity 13, member B	Multiple_Complex
TC0500013418.hg.1	7.65	4.61	8.24	3.98e-15	1.85e-13	FAM153A	family with sequence similarity 153, member A	Multiple_Complex
TC0500013417.hg.1	10.36	6.57	13.85	2.4e-10	5.55e-09	FAM153A	family with sequence similarity 153, member A	NonCoding
TC0500013268.hg.1	7.49	4.38	8.62	7.64e-14	2.89e-12	FAM153B	family with sequence similarity 153, member B	Multiple_Complex
TC0500013269.hg.1	7.84	4.65	9.13	1.92e-12	5.95e-11	FAM153B	family with sequence similarity 153, member B	NonCoding
TC0500013273.hg.1	8.11	4.62	11.24	8.35e-15	3.66e-13	FAM153C	family with sequence similarity 153, member C, pseudogene	Multiple_Complex
TC0400009001.hg.1	5.22	3.29	3.81	1.25e-14	5.3e-13	FAM160A1	family with sequence similarity 160, member A1	Multiple_Complex
TC1100009962.hg.1	7.53	9.02	-2.79	6.01e-14	2.31e-12	FAM160A2	family with sequence similarity 160, member A2	Multiple_Complex
TC0800006970.hg.1	6.89	7.93	-2.07	1.44e-05	0.0001	FAM160B2	family with sequence similarity 160, member B2	Multiple_Complex
TC0500011470.hg.1	9.21	10.4	-2.27	2.8e-08	4.51e-07	FAM172A; POU5F2; MIR2277	family with sequence similarity 172, member A; POU domain class 5, transcription factor 2; microRNA 2277	Multiple_Complex
TC0400011208.hg.1	8.98	7.57	2.65	3.95e-11	1.02e-09	FAM175A	family with sequence similarity 175, member A	Multiple_Complex
TC0500012980.hg.1	8.65	10.53	-3.68	7.3e-08	1.09e-06	FAM193B	family with sequence similarity 193, member B	Multiple_Complex
TC1600011322.hg.1	10.11	7.44	6.37	4.09e-19	3.09e-17	FAM195A	family with sequence similarity 195, member A	Multiple_Complex
TC1000008234.hg.1	8.44	6.39	4.16	1.22e-17	7.5e-16	FAM213A	family with sequence similarity 213, member A	Multiple_Complex
TC1200008843.hg.1	9.6	8.02	2.99	7.1e-14	2.69e-12	FAM216A	family with sequence similarity 216, member A	Multiple_Complex
TC0200016414.hg.1	6.67	7.74	-2.11	0.0005	0.0028	FAM228B	family with sequence similarity 228, member B	Multiple_Complex
TC0100013610.hg.1	6	7.58	-3	2.26e-08	3.69e-07	FAM229A	family with sequence similarity 229, member A	Multiple_Complex
TC0600009169.hg.1	7.15	5.82	2.5	1.16e-06	1.36e-05	FAM229B	family with sequence similarity 229, member B	Coding
TC0100009572.hg.1	6.18	7.85	-3.18	7.88e-17	4.45e-15	FAM46C	family with sequence similarity 46, member C	Coding
TC0200011837.hg.1	6.58	10.22	-12.45	4.12e-26	7.68e-24	FAM49A	family with sequence similarity 49, member A	Multiple_Complex
TC1000012130.hg.1	6.43	10.79	-20.51	8.34e-28	1.77e-25	FAM53B	Memczak2013 ALT_ACCEPTOR, ALT_DONOR, coding, INTERNAL, intronic best transcript NM_014661	NonCoding
TC1000012603.hg.1	6	9.72	-13.18	4.01e-24	6.01e-22	FAM53B	family with sequence similarity 53, member B	Multiple_Complex
TC1200010281.hg.1	11.96	10.8	2.23	5.38e-15	2.45e-13	FAM60A	family with sequence similarity 60, member A	Multiple_Complex
TC1500007379.hg.1	6.36	7.72	-2.58	6.2e-10	1.34e-08	FAM63B	family with sequence similarity 63, member B	Multiple_Complex
TC0200012684.hg.1	5.26	6.32	-2.09	4.97e-10	1.1e-08	FANCL	Fanconi anemia complementation group L	Multiple_Complex
TC0200015838.hg.1	10.39	8.81	3	3.17e-15	1.5e-13	FARSB	phenylalanyl-tRNA synthetase beta subunit	Multiple_Complex
TC1000008388.hg.1	8.3	9.98	-3.21	5.37e-13	1.79e-11	FAS	Fas cell surface death receptor	Multiple_Complex
TC0100010625.hg.1	4.64	7.15	-5.72	9.32e-20	7.99e-18	FASLG	Fas ligand (TNF superfamily, member 6)	Coding
TC1900010675.hg.1	14.97	13.94	2.04	4.46e-12	1.32e-10	FBL	fibrillarin	Multiple_Complex
TSUnmapped00000776.hg.1	15.55	14.48	2.1	1.57e-14	6.58e-13	FBL	fibrillarin	Coding
TSUnmapped00000349.hg.1	15.57	14.47	2.14	8.3e-16	4.15e-14	FBL	fibrillarin	Coding
TSUnmapped00000427.hg.1	15.49	14.37	2.18	3.46e-15	1.62e-13	FBL	fibrillarin	Coding
TC0500011655.hg.1	7.29	8.5	-2.32	1.1e-06	1.3e-05	FBXL17	F-box and leucine-rich repeat protein 17	Multiple_Complex
TC1700010565.hg.1	8.44	9.76	-2.51	9.68e-07	1.15e-05	FBXL20	F-box and leucine-rich repeat protein 20	Multiple_Complex
TC0900012227.hg.1	5.23	6.29	-2.08	1.91e-08	3.16e-07	FBXO10	F-box protein 10	Multiple_Complex
TC1800009026.hg.1	5.42	3.87	2.92	3.07e-12	9.32e-11	FBXO15	F-box protein 15	Multiple_Complex
TC0600013462.hg.1	5.45	6.5	-2.07	5.12e-06	5.1e-05	FBXO30	F-box protein 30	Coding
TC0900012021.hg.1	8.04	9.2	-2.23	0.0016	0.0072	FBXW5	F-box and WD repeat domain containing 5	Multiple_Complex
TC0400012143.hg.1	8.24	9.38	-2.2	6.05e-08	9.23e-07	FBXW7	F-box and WD repeat domain containing 7, E3 ubiquitin protein ligase	Multiple_Complex
TC0100010341.hg.1	8.32	7.01	2.49	5.69e-05	0.0004	FCER1G	Fc fragment of IgE, high affinity I, receptor for; gamma polypeptide	Multiple_Complex
TC1900010676.hg.1	7.96	6.74	2.32	6.39e-06	6.21e-05	FCGBP	Fc fragment of IgG binding protein	Multiple_Complex
TSUnmapped00000392.hg.1	7.16	5.84	2.49	1.17e-08	2.02e-07	FCGBP	Fc fragment of IgG binding protein	Coding
TC0100018308.hg.1	7.11	8.28	-2.25	5.54e-07	6.97e-06	FCGR2A	Fc fragment of IgG, low affinity IIa, receptor (CD32)	Multiple_Complex
TC0100018310.hg.1	5.04	6.34	-2.46	2.52e-07	3.43e-06	FCGR2B	Fc fragment of IgG, low affinity IIb, receptor (CD32)	Multiple_Complex
TC0100018309.hg.1	5.48	7.78	-4.91	9.08e-12	2.58e-10	FCGR2C	Fc fragment of IgG, low affinity IIc, receptor for (CD32) (gene/pseudogene)	Multiple_Complex
TC0100016185.hg.1	4.61	7.57	-7.78	3.34e-14	1.34e-12	FCGR3A	Fc fragment of IgG, low affinity IIIa, receptor (CD16a)	Multiple_Complex
TC0100016189.hg.1	4.44	6.96	-5.74	3.3e-15	1.56e-13	FCGR3B	Fc fragment of IgG, low affinity IIIb, receptor (CD16b)	Multiple_Complex
TC0500007758.hg.1	4.46	6.94	-5.55	6.06e-20	5.44e-18	FCHO2	FCH domain only 2	Multiple_Complex
TC0500012285.hg.1	9.41	10.46	-2.07	2.19e-05	0.0002	FCHSD1	FCH and double SH3 domains 1	Multiple_Complex
TC0100017110.hg.1	14.33	11.78	5.87	9.02e-18	5.66e-16	FCMR	Fc fragment of IgM receptor	Multiple_Complex
TC0100016049.hg.1	5.95	11.94	-63.79	3.56e-20	3.31e-18	FCRL3	Fc receptor-like 3	Multiple_Complex
TC0100010268.hg.1	8.19	10	-3.5	1.88e-16	1.01e-14	FCRL6	Fc receptor-like 6	Multiple_Complex
TC1100007938.hg.1	6.89	8.38	-2.82	7.9e-08	1.18e-06	FERMT3	fermitin family member 3	Multiple_Complex
TC1100012708.hg.1	3.9	6.52	-6.13	5.87e-13	1.94e-11	FEZ1	fasciculation and elongation protein zeta 1	Multiple_Complex
TC1700012183.hg.1	7.7	4.8	7.43	2.86e-20	2.69e-18	FGF11	fibroblast growth factor 11	Multiple_Complex
TC1300006543.hg.1	8.05	7.04	2.01	0.0002	0.0015	FGF9	fibroblast growth factor 9	Multiple_Complex
TC0400012902.hg.1	8.77	15.81	-131.7	1.83e-23	2.64e-21	FGFBP2	fibroblast growth factor binding protein 2	Coding
TC0700011584.hg.1	5.55	8	-5.49	2.71e-08	4.37e-07	FGL2	fibrinogen-like 2	Multiple_Complex
TC0100013441.hg.1	5.97	8.26	-4.88	3.62e-18	2.44e-16	FGR	FGR proto-oncogene, Src family tyrosine kinase	Multiple_Complex
TC0300011324.hg.1	5.43	4.15	2.44	6.2e-08	9.4e-07	FHIT	fragile histidine triad	Multiple_Complex
TC1200010601.hg.1	10.72	12.06	-2.53	6.58e-10	1.42e-08	FKBP11; ARF3	FK506 binding protein 11; ADP-ribosylation factor 3	Multiple_Complex
TC0900011252.hg.1	8.2	9.31	-2.16	9.63e-11	2.36e-09	FKBP15	FK506 binding protein 15	Multiple_Complex
TC2000009965.hg.1	9.73	8.7	2.04	2.91e-13	1.01e-11	FKBP1A; MIR6869	FK506 binding protein 1A; microRNA 6869	Multiple_Complex
TC1100007941.hg.1	8.38	7.36	2.03	0.0046	0.0176	FKBP2	FK506 binding protein 2	Multiple_Complex
TC1700008218.hg.1	5.72	6.91	-2.28	1.51e-07	2.16e-06	FLJ45513; RP11-304F15.3	uncharacterized LOC729220; novel transcript antisense to TAC4	Multiple_Complex
TC0X00011194.hg.1	10.57	12.98	-5.32	2.81e-16	1.46e-14	FLNA	filamin A, alpha	Multiple_Complex
TC0X00008826.hg.1	8.16	10.28	-4.35	2.47e-08	4.01e-07	FLNA	Jeck2013 ANTISENSE, CDS, coding, INTERNAL, OVCODE, OVEXON best transcript NM_001110556	NonCoding
TC0X00008827.hg.1	5.65	7.45	-3.49	2.42e-09	4.66e-08	FLNA	Memczak2013 ANTISENSE, CDS, coding, INTERNAL best transcript NM_001456	NonCoding
TC0300007596.hg.1	7.11	5.94	2.24	6.98e-10	1.49e-08	FLNB	filamin B, beta	Multiple_Complex
TC1900011779.hg.1	9.62	8.29	2.52	1.12e-10	2.72e-09	FLT3LG	fms-related tyrosine kinase 3 ligand	Multiple_Complex
TC1700008049.hg.1	12.36	13.48	-2.17	1.51e-07	2.17e-06	FMNL1	formin like 1	Multiple_Complex
TC0300009500.hg.1	11.03	13.18	-4.44	2.48e-19	1.94e-17	FNDC3B	fibronectin type III domain containing 3B	Multiple_Complex
TC0200007096.hg.1	7.37	10.94	-11.9	2.48e-19	1.94e-17	FOSL2	FOS-like antigen 2	Multiple_Complex
TC0600009059.hg.1	10.42	11.61	-2.27	2.43e-12	7.47e-11	FOXO3	forkhead box O3	Multiple_Complex
TC0300011502.hg.1	8	6.83	2.25	0.0128	0.0401	FOXP1; RP11-298C2.1	Transcript Identified by AceView, Entrez Gene ID(s) 27086; novel transcript, sense intronic to FOXP1	NonCoding
TC0600008006.hg.1	5.72	8.05	-5.01	1.2e-15	5.87e-14	FOXP4; MIR4641	forkhead box P4; microRNA 4641	Multiple_Complex
TC0X00008070.hg.1	4.39	7.96	-11.89	7.14e-30	2.07e-27	FRMPD3	FERM and PDZ domain containing 3	Multiple_Complex
TC0X00010468.hg.1	4	5.18	-2.27	5.61e-10	1.22e-08	FRMPD3-AS1	FRMPD3 antisense RNA 1	NonCoding
TC1900006640.hg.1	8.79	9.84	-2.06	1.65e-05	0.0001	FZR1	fizzy/cell division cycle 20 related 1	Multiple_Complex
TC1900007839.hg.1	12.24	11.2	2.05	2.15e-09	4.18e-08	FXYD5	FXYD domain containing ion transport regulator 5	Multiple_Complex
TC0300010933.hg.1	8.41	10.61	-4.59	9.58e-17	5.34e-15	FYCO1	FYVE and coiled-coil domain containing 1	Multiple_Complex
TC0600012875.hg.1	12.47	14.7	-4.69	2.93e-18	2e-16	FYN	FYN proto-oncogene, Src family tyrosine kinase	Multiple_Complex
TC0X00011221.hg.1	6.87	12.14	-38.65	1.8e-40	2.27e-37	GAB3	GRB2-associated binding protein 3	Multiple_Complex
TC1200006787.hg.1	12.43	14.46	-4.08	2.85e-23	3.97e-21	GABARAPL1	GABA(A) receptor-associated protein like 1	Multiple_Complex
TC0100008664.hg.1	6.21	7.32	-2.15	0.007	0.0248	GADD45A	growth arrest and DNA-damage-inducible, alpha	Multiple_Complex
TC0700011977.hg.1	5.97	3.95	4.07	1.01e-21	1.16e-19	GAL3ST4	galactose-3-O-sulfotransferase 4	Multiple_Complex
TC0200007296.hg.1	6.36	8.25	-3.72	5.54e-11	1.4e-09	GALM	galactose mutarotase (aldose 1-epimerase)	Multiple_Complex
TC1600011235.hg.1	7.78	8.96	-2.25	9.8e-07	1.17e-05	GALNS	galactosamine (N-acetyl)-6-sulfatase	Multiple_Complex
TC0200014809.hg.1	4	7.18	-9.08	7.82e-28	1.68e-25	GALNT3	polypeptide N-acetylgalactosaminyltransferase 3	Multiple_Complex
TC0400009322.hg.1	7.87	8.88	-2.01	1.46e-05	0.0001	GALNT7	polypeptide N-acetylgalactosaminyltransferase 7	Multiple_Complex
TC1500010864.hg.1	6.06	4.98	2.11	9.04e-07	1.08e-05	GATM	glycine amidinotransferase (L-arginine:glycine amidinotransferase)	Multiple_Complex
TC1000008716.hg.1	10.4	11.42	-2.03	2.21e-06	2.43e-05	GBF1	golgi brefeldin A resistant guanine nucleotide exchange factor 1	Multiple_Complex
TC0100018451.hg.1	15.59	14.52	2.1	3.13e-06	3.31e-05	GBP2	guanylate binding protein 2, interferon-inducible	Multiple_Complex
TC0100014855.hg.1	12.57	11.51	2.1	3.77e-07	4.95e-06	GBP4	guanylate binding protein 4	Multiple_Complex
TC0200009829.hg.1	6.38	4.86	2.86	3.81e-07	5e-06	GCA	grancalcin, EF-hand calcium binding protein	Multiple_Complex
TC0900012141.hg.1	3.82	5.92	-4.31	1.18e-17	7.3e-16	GCNT1	glucosaminyl (N-acetyl) transferase 1, core 2	Multiple_Complex
TC0500011157.hg.1	8.53	6.1	5.38	6.34e-14	2.43e-12	GCNT4	glucosaminyl (N-acetyl) transferase 4, core 2	Coding
TC1100011652.hg.1	5.1	6.45	-2.54	5.3e-10	1.16e-08	GDPD5	glycerophosphodiester phosphodiesterase domain containing 5	Multiple_Complex
TC1900011764.hg.1	7.65	9.28	-3.09	9.19e-12	2.61e-10	GEMIN7	gem nuclear organelle associated protein 7	Multiple_Complex
TC0100014926.hg.1	6.39	7.47	-2.12	7.33e-06	7.03e-05	GFI1	growth factor independent 1 transcription repressor	Multiple_Complex
TC0500013089.hg.1	3.92	5.45	-2.9	4.03e-07	5.25e-06	GFPT2	glutamine-fructose-6-phosphate transaminase 2	Multiple_Complex
TC1600009737.hg.1	11.63	13.73	-4.28	2.3e-19	1.84e-17	GGA2	golgi-associated, gamma adaptin ear containing, ARF binding protein 2	Multiple_Complex
TC2200008078.hg.1	8.71	10.29	-2.98	2.13e-09	4.16e-08	GGT2	gamma-glutamyltransferase 2	Multiple_Complex
TC0300012664.hg.1	6.93	9.92	-7.91	9.24e-21	9.31e-19	GK5	glycerol kinase 5 (putative)	Multiple_Complex
TC1100009618.hg.1	5.49	8.33	-7.17	2.52e-17	1.49e-15	GLB1L2	galactosidase beta 1 like 2	Multiple_Complex
TC0700013338.hg.1	6.6	8.66	-4.18	6.04e-20	5.44e-18	GLCCI1	glucocorticoid induced 1	Multiple_Complex
TC1200008224.hg.1	10.05	12.28	-4.69	2.31e-21	2.51e-19	GLIPR1	GLI pathogenesis-related 1	Multiple_Complex
TC0900007115.hg.1	6.13	9.59	-11.04	3.13e-25	5.36e-23	GLIPR2	GLI pathogenesis-related 2	Multiple_Complex
TC0500011497.hg.1	10.37	9.3	2.1	5.35e-08	8.21e-07	GLRX	glutaredoxin	Multiple_Complex
TC1200011885.hg.1	8.27	9.72	-2.74	5.29e-13	1.77e-11	GLTP	glycolipid transfer protein	Coding
TC0600014126.hg.1	7.73	8.91	-2.26	2.84e-06	3.04e-05	GLTSCR1L	GLTSCR1-like	Multiple_Complex
TC0100016625.hg.1	7.5	11.14	-12.48	1.76e-31	6.19e-29	GLUL	glutamate-ammonia ligase	Multiple_Complex
TC0500009116.hg.1	8.33	7.28	2.08	0.0005	0.0028	GM2A	GM2 ganglioside activator	Multiple_Complex
TC0600014215.hg.1	8.99	7.94	2.07	5.81e-09	1.06e-07	GMDS	GDP-mannose 4,6-dehydratase	Multiple_Complex
TC0200010852.hg.1	7.63	8.98	-2.55	1.07e-08	1.87e-07	GMPPA	GDP-mannose pyrophosphorylase A	Multiple_Complex
TC1900006616.hg.1	7.74	5.73	4.01	2.24e-16	1.19e-14	GNA11	guanine nucleotide binding protein (G protein), alpha 11 (Gq class)	Multiple_Complex
TC1800006706.hg.1	4.04	5.17	-2.18	4.82e-07	6.17e-06	GNAL	guanine nucleotide binding protein (G protein), alpha activating activity polypeptide, olfactory type	Multiple_Complex
TC1600007944.hg.1	7.09	10.8	-13.04	1.07e-27	2.25e-25	GNAO1	guanine nucleotide binding protein (G protein), alpha activating activity polypeptide O	Multiple_Complex
TC1400007154.hg.1	10.25	13.06	-7.02	5.56e-32	2.13e-29	GNG2	guanine nucleotide binding protein (G protein), gamma 2	Multiple_Complex
TC1900009240.hg.1	9.23	6.26	7.84	2.39e-15	1.13e-13	GNG7	guanine nucleotide binding protein (G protein), gamma 7	Coding
TC1700011032.hg.1	5.67	8.27	-6.07	7.02e-18	4.46e-16	GNGT2	guanine nucleotide binding protein (G protein), gamma transducing activity polypeptide 2	Coding
TC0200008268.hg.1	8.02	18.16	-1125	1.4e-45	1.4e-45	GNLY	granulysin	Multiple_Complex
TC0500012302.hg.1	6.25	5.01	2.36	2.75e-10	6.32e-09	GNPDA1	glucosamine-6-phosphate deaminase 1	Multiple_Complex
TC1200011711.hg.1	9.51	11.75	-4.73	2.86e-18	1.96e-16	GNPTAB	N-acetylglucosamine-1-phosphate transferase, alpha and beta subunits	Multiple_Complex
TC1500008183.hg.1	9.72	11.3	-2.99	1.11e-06	1.31e-05	GOLGA6L3	golgin A6 family-like 3	Multiple_Complex
TC1500008139.hg.1	5.77	7.09	-2.49	1.53e-06	1.75e-05	GOLGA6L4	Homo sapiens golgin A6 family-like 4 (GOLGA6L4), mRNA.; golgin A6 family-like 4; golgin A6 family-like 4 [Source:HGNC Symbol;Acc:HGNC:27256]	Multiple_Complex
TC0800007414.hg.1	12.1	13.18	-2.11	6.84e-13	2.24e-11	GOLGA7	golgin A7	Multiple_Complex
TC1500008988.hg.1	9.68	11.52	-3.58	0.0002	0.0014	GOLGA8A; GOLGA8B	golgin A8 family, member A; golgin A8 family, member B	Multiple_Complex
TC1500008995.hg.1	9.47	11.41	-3.84	6.34e-05	0.0005	GOLGA8B	golgin A8 family, member B	Multiple_Complex
TC1500010846.hg.1	6.27	7.56	-2.46	6.04e-08	9.22e-07	GOLGA8K; ULK4P1	golgin A8 family, member K; ULK4 pseudogene 1	Multiple_Complex
TC1500010712.hg.1	9.52	11.08	-2.96	2.02e-05	0.0002	GOLGA8N	golgin A8 family, member N	Multiple_Complex
TC1500008933.hg.1	7.24	8.87	-3.1	2.78e-07	3.74e-06	GOLGA8O	golgin A8 family, member O	Multiple_Complex
TC1500010842.hg.1	5.14	6.39	-2.38	2.07e-06	2.29e-05	GOLGA8R	golgin A8 family, member R	Multiple_Complex
TC0300013599.hg.1	4.56	3.54	2.03	1.29e-07	1.86e-06	GP5	glycoprotein V (platelet)	Coding
TC0200016548.hg.1	4.34	5.65	-2.48	0.0003	0.0018	GPD2	glycerol-3-phosphate dehydrogenase 2	Multiple_Complex
TC1900009445.hg.1	10.72	12.66	-3.84	3.74e-16	1.93e-14	GPR108; MIR6791	G protein-coupled receptor 108; microRNA 6791	Multiple_Complex
TC0100012089.hg.1	7.44	9.24	-3.46	1.06e-14	4.56e-13	GPR137B	G protein-coupled receptor 137B	Multiple_Complex
TC0700013354.hg.1	4.54	8.26	-13.23	1.02e-15	5.03e-14	GPR141	G protein-coupled receptor 141	Multiple_Complex
TC0100012674.hg.1	6.4	8.55	-4.45	5.1e-15	2.33e-13	GPR153	G protein-coupled receptor 153	Multiple_Complex
TC0200014991.hg.1	10.1	8.59	2.84	2.97e-06	3.16e-05	GPR155	G protein-coupled receptor 155	Multiple_Complex
TC1300009597.hg.1	10.36	8.71	3.13	2.08e-09	4.08e-08	GPR18	G protein-coupled receptor 18	Coding
TC1300009598.hg.1	11.22	9.9	2.49	9.52e-06	8.88e-05	GPR183	G protein-coupled receptor 183	Coding
TC1200009972.hg.1	4.97	6	-2.04	3.25e-05	0.0003	GPR19	G protein-coupled receptor 19	Multiple_Complex
TC0100010674.hg.1	5.82	8.82	-8.01	3.93e-18	2.63e-16	GPR52	G protein-coupled receptor 52	Coding
TC0200016000.hg.1	6.89	5.67	2.33	0.001	0.0048	GPR55	G protein-coupled receptor 55	Multiple_Complex
TC0X00007977.hg.1	7.11	5.76	2.54	3.35e-08	5.33e-07	GPRASP1	G protein-coupled receptor associated sorting protein 1	Multiple_Complex
TC0400012947.hg.1	8.61	11.42	-7.02	6.48e-20	5.73e-18	GPRIN3	GPRIN family member 3	Coding
TC0300011059.hg.1	12.42	9.98	5.44	5.88e-23	7.69e-21	GPX1	glutathione peroxidase 1	Multiple_Complex
TC0500009109.hg.1	6.02	8.48	-5.5	2.27e-10	5.28e-09	GPX3	glutathione peroxidase 3	Multiple_Complex
TC1900006510.hg.1	12.01	10.08	3.81	2.75e-19	2.15e-17	GPX4	glutathione peroxidase 4	Multiple_Complex
TC1100013109.hg.1	5.29	7.53	-4.73	2.54e-12	7.75e-11	GRAMD1B	GRAM domain containing 1B	Multiple_Complex
TC0500008539.hg.1	7.61	6.38	2.35	6.75e-10	1.45e-08	GRAMD3	GRAM domain containing 3	Multiple_Complex
TC1700009995.hg.1	7.68	4.7	7.91	1.72e-22	2.17e-20	GRAP	GRB2-related adaptor protein	Multiple_Complex
TC1700007153.hg.1	8.08	5.99	4.25	1.8e-17	1.08e-15	GRAPL	GRB2-related adaptor protein-like	Coding
TC1000009067.hg.1	9.84	8.6	2.37	2.54e-07	3.45e-06	GRK5	G protein-coupled receptor kinase 5	Multiple_Complex
TC0700011586.hg.1	5.75	7.23	-2.8	2.8e-07	3.76e-06	GSAP	gamma-secretase activating protein	Multiple_Complex
TC1600008698.hg.1	6.75	7.95	-2.31	6.34e-09	1.15e-07	GSE1	Gse1 coiled-coil protein	Multiple_Complex
TC0800010034.hg.1	7.41	8.46	-2.07	7.41e-10	1.57e-08	GSR	glutathione reductase	Multiple_Complex
TC0100015211.hg.1	9.1	6.29	7.01	2.96e-07	3.96e-06	GSTM3	glutathione S-transferase mu 3 (brain)	Multiple_Complex
TC1000008800.hg.1	10.54	9.48	2.08	2.7e-06	2.91e-05	GSTO1	glutathione S-transferase omega 1	Multiple_Complex
TC0500007413.hg.1	6.53	14.25	-211.6	1.4e-45	2.05e-43	GZMA	granzyme A	Multiple_Complex
TC1400008764.hg.1	7.72	12.8	-33.91	3.1e-31	1.02e-28	GZMB	granzyme B	Coding
TC1400008763.hg.1	5.67	14.11	-347.62	1.4e-45	1.4e-45	GZMH	granzyme H	Coding
TC0500007408.hg.1	8.74	12.37	-12.35	3.65e-10	8.25e-09	GZMK	granzyme K	Multiple_Complex
TC1800008988.hg.1	8.12	4.14	15.79	1.85e-28	4.45e-26	GTSCR1	Gilles de la Tourette syndrome chromosome region, candidate 1 (non-protein coding)	Multiple_Complex
TC0200009189.hg.1	11.92	10.58	2.54	1.07e-12	3.44e-11	GYPC	glycophorin C (Gerbich blood group)	Multiple_Complex
TC0200014154.hg.1	11.13	8.96	4.49	1.79e-10	4.2e-09	GYPC	Memczak2013 ANTISENSE, coding, INTERNAL, UTR3 best transcript NM_016815	NonCoding
TC2200007318.hg.1	5.06	3.97	2.13	5.33e-11	1.35e-09	H1F0	H1 histone family, member 0	Multiple_Complex
TC0900008109.hg.1	8.94	7.62	2.5	1.43e-16	7.77e-15	HABP4	hyaluronan binding protein 4	Multiple_Complex
TC0900009685.hg.1	8.26	9.98	-3.29	1.94e-08	3.21e-07	HACD4	3-hydroxyacyl-CoA dehydratase 4	Multiple_Complex
TC1500010368.hg.1	9.54	6.7	7.16	7.45e-20	6.44e-18	HAPLN3	hyaluronan and proteoglycan link protein 3	Multiple_Complex
TC0600013251.hg.1	12.31	11.18	2.19	2.01e-09	3.96e-08	HBS1L	HBS1-like translational GTPase	Multiple_Complex
TC0600008043.hg.1	5.12	6.45	-2.51	1.72e-07	2.43e-06	HCRP1	Transcript Identified by AceView, Entrez Gene ID(s) 387535	Unassigned
TC2200009360.hg.1	4.86	5.87	-2.01	1.39e-08	2.35e-07	HDAC10	histone deacetylase 10	Multiple_Complex
TC0200016252.hg.1	9.91	11.38	-2.77	1.82e-10	4.27e-09	HDAC4	histone deacetylase 4	Multiple_Complex
TC1500010914.hg.1	6.02	7.41	-2.62	5.76e-05	0.0004	HDGFRP3	hepatoma-derived growth factor, related protein 3; Hepatoma-derived growth factor-related protein 3 [Source:UniProtKB/Swiss-Prot;Acc:Q9Y3E1]; Transcript Identified by AceView, Entrez Gene ID(s) 50810; Jeck2013, Memczak2013, Salzman2013 ANNOTATED, CDS, coding, INTERNAL, OVCODE, OVEXON best transcript NM_016073; Jeck2013 ALT_ACCEPTOR, ALT_DONOR, coding, INTERNAL, intronic best transcript NM_016073;…	Multiple_Complex
TC1400010728.hg.1	4.11	5.43	-2.5	0.0002	0.0011	HEATR5A	HEAT repeat containing 5A	Multiple_Complex
TC0200012256.hg.1	8.6	9.74	-2.2	1.33e-08	2.26e-07	HEATR5B	HEAT repeat containing 5B	Multiple_Complex
TC1700010445.hg.1	4.54	6.38	-3.58	2.43e-16	1.28e-14	HEATR9	HEAT repeat containing 9	Multiple_Complex
TC1200009981.hg.1	7.44	6.24	2.3	2.35e-10	5.44e-09	HEBP1	heme binding protein 1	Multiple_Complex
TC0100013998.hg.1	8.13	9.7	-2.96	3.54e-10	8e-09	HECTD3	HECT domain containing E3 ubiquitin protein ligase 3	Multiple_Complex
TC1200011968.hg.1	8.43	9.6	-2.25	6.98e-07	8.6e-06	HECTD4; MIR6861	HECT domain containing E3 ubiquitin protein ligase 4; microRNA 6861	Multiple_Complex
TC1700011519.hg.1	8.74	10.41	-3.18	2.09e-07	2.88e-06	HELZ	helicase with zinc finger	Multiple_Complex
TC0100015171.hg.1	9.3	10.67	-2.57	1.58e-10	3.75e-09	HENMT1	HEN1 methyltransferase homolog 1 (Arabidopsis)	Multiple_Complex
TC1500010689.hg.1	7.32	6.25	2.1	4.67e-09	8.66e-08	HERC2P2	hect domain and RLD 2 pseudogene 2	Multiple_Complex
TC0400011291.hg.1	8.76	10.2	-2.71	3.03e-13	1.05e-11	HERC6	Memczak2013 ANTISENSE, coding, INTERNAL, intronic best transcript NM_001165136	NonCoding
TC0700010728.hg.1	10.6	12.29	-3.22	6.52e-20	5.73e-18	HERPUD2	HERPUD family member 2	Multiple_Complex
TC0800009242.hg.1	6.43	7.5	-2.1	0.0014	0.0066	HGH1	HGH1 homolog	Multiple_Complex
TC1700009189.hg.1	7.68	9.11	-2.7	3.81e-07	5e-06	HGS	hepatocyte growth factor-regulated tyrosine kinase substrate	Multiple_Complex
TC0800007460.hg.1	10.81	11.85	-2.05	3.4e-06	3.56e-05	HGSNAT	heparan-alpha-glucosaminide N-acetyltransferase	Multiple_Complex
TC0100011472.hg.1	4.67	6.11	-2.71	2.73e-06	2.94e-05	HHAT	hedgehog acyltransferase	Multiple_Complex
TC0700013458.hg.1	10.2	8.36	3.58	2.9e-10	6.64e-09	HILPDA	hypoxia inducible lipid droplet-associated	Multiple_Complex
TC0500011984.hg.1	11.9	10.64	2.4	2.2e-11	5.87e-10	HINT1	histidine triad nucleotide binding protein 1	Multiple_Complex
TC0600007374.hg.1	7.12	8.14	-2.02	0.0001	0.001	HIST1H2AI	histone cluster 1, H2ai	Coding
TC0600014248.hg.1	5.58	6.59	-2.01	0.0001	0.0008	HIST1H2BB	histone cluster 1, H2bb	Coding
TC0600011185.hg.1	9.39	10.87	-2.79	0.0003	0.0017	HIST1H2BK	histone cluster 1, H2bk	Multiple_Complex
TC0600007377.hg.1	9.87	12.22	-5.11	1.51e-10	3.61e-09	HIST1H2BM	histone cluster 1, H2bm	Coding
TC0100011871.hg.1	5.15	6.17	-2.03	0.0005	0.0026	HIST3H2BB	histone cluster 3, H2bb	Coding
TC0600014074.hg.1	10.17	8.62	2.94	6.71e-10	1.44e-08	HIVEP1	human immunodeficiency virus type I enhancer binding protein 1	Multiple_Complex
TC0600013409.hg.1	11.01	9.88	2.19	1.06e-06	1.26e-05	HIVEP2	human immunodeficiency virus type I enhancer binding protein 2	Multiple_Complex
TC0100013873.hg.1	5.4	7.09	-3.23	1.44e-10	3.45e-09	HIVEP3	human immunodeficiency virus type I enhancer binding protein 3	Multiple_Complex
TC0200008099.hg.1	7.36	5.77	3	1.97e-13	6.99e-12	HK2	hexokinase 2	Multiple_Complex
TC1900011722.hg.1	8.55	9.59	-2.05	0.0003	0.0019	HKR1	HKR1, GLI-Kruppel zinc finger family member	Multiple_Complex
TC0600014277.hg.1	8.97	10.82	-3.6	7.42e-11	1.83e-09	HLA-DMA	major histocompatibility complex, class II, DM alpha	Multiple_Complex
TC0600014276.hg.1	8.08	9.45	-2.59	4.78e-08	7.41e-07	HLA-DMB	major histocompatibility complex, class II, DM beta	Multiple_Complex
TC0600011516.hg.1	5.72	3.77	3.87	1.41e-16	7.69e-15	HLA-DOA	major histocompatibility complex, class II, DO alpha	Multiple_Complex
TC0600011517.hg.1	9.87	13.08	-9.23	1.42e-29	4e-27	HLA-DPA1	major histocompatibility complex, class II, DP alpha 1	Multiple_Complex
TC0600007677.hg.1	12.58	14.84	-4.79	6.62e-14	2.53e-12	HLA-DPB1	major histocompatibility complex, class II, DP beta 1	Multiple_Complex
TC0600007657.hg.1	7.31	9.21	-3.72	8.05e-05	0.0006	HLA-DQA1	major histocompatibility complex, class II, DQ alpha 1	Multiple_Complex
TC0600007650.hg.1	7.11	8.69	-3	8.68e-05	0.0006	HLA-DRA	major histocompatibility complex, class II, DR alpha	Coding
TC0600014273.hg.1	6.19	9.91	-13.15	1.55e-14	6.49e-13	HLA-DRB1	major histocompatibility complex, class II, DR beta 1	Multiple_Complex
TC0600011491.hg.1	4.04	5.11	-2.1	0.0002	0.0014	HLA-DRB5	major histocompatibility complex, class II, DR beta 5	Multiple_Complex
TC2100008087.hg.1	5.1	6.16	-2.09	2.59e-05	0.0002	HLCS	holocarboxylase synthetase (biotin-(proprionyl-CoA-carboxylase (ATP-hydrolysing)) ligase)	Multiple_Complex
TC0600007748.hg.1	10.94	9.82	2.17	1.15e-09	2.38e-08	HMGA1	high mobility group AT-hook 1	Multiple_Complex
TC1900006509.hg.1	8.07	6.83	2.35	6.82e-07	8.44e-06	HMHA1	histocompatibility (minor) HA-1	Multiple_Complex
TC1700012468.hg.1	9.51	10.69	-2.26	4.34e-12	1.29e-10	HN1	hematological and neurological expressed 1	Multiple_Complex
TC0200012288.hg.1	6.41	7.65	-2.36	0.0012	0.006	HNRNPLL	heterogeneous nuclear ribonucleoprotein L-like	Multiple_Complex
TC0100008503.hg.1	9.76	7.31	5.46	8.72e-13	2.83e-11	HOOK1	hook microtubule-tethering protein 1	Multiple_Complex
TC0400010775.hg.1	4.19	5.82	-3.1	5.35e-09	9.81e-08	HOPX	HOP homeobox	Multiple_Complex
TC1700012432.hg.1	5.16	6.32	-2.23	4.56e-07	5.87e-06	HOXB3; HOXB4; MIR10A	homeobox B3; homeobox B4; microRNA 10a	Multiple_Complex
TC1700012434.hg.1	4.35	5.45	-2.15	1.97e-06	2.2e-05	HOXB7	homeobox B7	Multiple_Complex
TC0200006687.hg.1	7.93	6.33	3.03	4.37e-16	2.25e-14	HPCAL1	hippocalcin-like 1	Multiple_Complex
TC0100013802.hg.1	7.15	5.93	2.34	7.29e-10	1.55e-08	HPCAL4	hippocalcin like 4	Coding
TC0300009131.hg.1	10.15	11.65	-2.82	2.83e-12	8.63e-11	HPS3	Hermansky-Pudlak syndrome 3	Multiple_Complex
TC1800007829.hg.1	8.54	6.5	4.09	7.62e-12	2.2e-10	HSBP1L1	heat shock factor binding protein 1-like 1	Multiple_Complex
TC1100012992.hg.1	7.08	5.85	2.36	1.24e-05	0.0001	HSD17B12	hydroxysteroid (17-beta) dehydrogenase 12	Multiple_Complex
TC1900011099.hg.1	5.1	4.02	2.12	9.64e-11	2.36e-09	HSD17B14	hydroxysteroid (17-beta) dehydrogenase 14	Multiple_Complex
TC0600009322.hg.1	10.18	8.81	2.59	1.26e-09	2.58e-08	HSF2	heat shock transcription factor 2	Multiple_Complex
TC1600008146.hg.1	6.46	7.93	-2.76	6.48e-09	1.17e-07	HSF4; FBXL8	heat shock transcription factor 4; F-box and leucine-rich repeat protein 8	Multiple_Complex
TC0600008129.hg.1	15.78	14.6	2.27	1.01e-19	8.59e-18	HSP90AB1	heat shock protein 90kDa alpha (cytosolic), class B member 1	Multiple_Complex
TC0100013229.hg.1	6.07	4.03	4.11	8.91e-15	3.89e-13	HSPG2	heparan sulfate proteoglycan 2	Multiple_Complex
TC0800007366.hg.1	4.73	5.94	-2.31	7.48e-10	1.58e-08	HTRA4	HtrA serine peptidase 4	Coding
TC1500007977.hg.1	5.02	3.65	2.59	4.82e-12	1.42e-10	HYKK	hydroxylysine kinase	Multiple_Complex
TSUnmapped00000310.hg.1	7.06	8.32	-2.39	1.92e-07	2.68e-06	HYOU1	hypoxia up-regulated 1	Coding
TSUnmapped00000327.hg.1	7.8	8.83	-2.04	0.0003	0.0016	HYOU1	hypoxia up-regulated 1	Coding
TC0200010527.hg.1	8.53	6.5	4.07	1.34e-16	7.31e-15	ICOS	inducible T-cell co-stimulator	Coding
TC0200006627.hg.1	8.34	11.16	-7.06	3.43e-19	2.63e-17	ID2	inhibitor of DNA binding 2, dominant negative helix-loop-helix protein	Multiple_Complex
TC0100013293.hg.1	9.42	4.64	27.38	5.46e-26	9.84e-24	ID3	inhibitor of DNA binding 3, dominant negative helix-loop-helix protein	Multiple_Complex
TC1500010422.hg.1	10.23	11.29	-2.08	1.29e-08	2.2e-07	IDH2	isocitrate dehydrogenase 2 (NADP+), mitochondrial	Multiple_Complex
TC0X00011404.hg.1	11.48	12.63	-2.23	2.94e-13	1.02e-11	IDS	iduronate 2-sulfatase	Multiple_Complex
TC0100010244.hg.1	15	16.08	-2.11	3.97e-09	7.44e-08	IFI16	interferon, gamma-inducible protein 16	Multiple_Complex
TC0100008815.hg.1	8.33	6.59	3.33	0.0019	0.0085	IFI44L	interferon-induced protein 44-like	Multiple_Complex
TC1200011177.hg.1	5.31	7.15	-3.59	4.63e-05	0.0004	IFNG	interferon, gamma	Multiple_Complex
TC0600013300.hg.1	7.77	8.84	-2.11	2.05e-05	0.0002	IFNGR1	interferon gamma receptor 1	Multiple_Complex
TC2100006968.hg.1	7.71	5.82	3.7	1.12e-08	1.94e-07	IFNGR2	Memczak2013 ALT_ACCEPTOR, ALT_DONOR, coding, INTERNAL, intronic best transcript NM_005534	NonCoding
TC2100006967.hg.1	10.07	5.49	23.93	1.45e-33	7.05e-31	IFNGR2	interferon gamma receptor 2 (interferon gamma transducer 1)	Multiple_Complex
TC0200012082.hg.1	7.31	8.63	-2.49	1.45e-06	1.67e-05	IFT172	intraflagellar transport 172	Multiple_Complex
TC1500008485.hg.1	11.81	7.7	17.24	2.14e-29	5.67e-27	IGF1R	insulin-like growth factor 1 receptor	Multiple_Complex
TC0600010066.hg.1	7.91	9.71	-3.47	2.21e-12	6.82e-11	IGF2R	insulin-like growth factor 2 receptor	Multiple_Complex
TC0200010745.hg.1	7.14	5.6	2.91	1.27e-12	4.05e-11	IGFBP2	insulin like growth factor binding protein 2	Multiple_Complex
TC1100012906.hg.1	7.43	6.29	2.21	0.0002	0.0013	IGSF9B	immunoglobulin superfamily, member 9B	Multiple_Complex
TC0X00008844.hg.1	5.4	6.81	-2.67	5.82e-07	7.29e-06	IKBKG	inhibitor of kappa light polypeptide gene enhancer in B-cells, kinase gamma	Multiple_Complex
TC0200015631.hg.1	6.44	7.99	-2.94	8.14e-06	7.69e-05	IKZF2	IKAROS family zinc finger 2	Multiple_Complex
TC1100009191.hg.1	10.18	12.02	-3.58	2.02e-11	5.4e-10	IL10RA	interleukin 10 receptor, alpha	Multiple_Complex
TC0400008861.hg.1	5.99	7.57	-2.99	1.34e-06	1.55e-05	IL15	interleukin 15	Multiple_Complex
TC0200016502.hg.1	6.5	9.28	-6.89	9.59e-17	5.34e-15	IL18R1	interleukin 18 receptor 1	Multiple_Complex
TC0200008675.hg.1	4.13	10.06	-60.87	1.06e-21	1.21e-19	IL18RAP	interleukin 18 receptor accessory protein	Multiple_Complex
TC1200007838.hg.1	10.79	8.88	3.76	4.4e-17	2.52e-15	IL23A	interleukin 23, alpha subunit p19	Multiple_Complex
TC0100011391.hg.1	8.3	6.89	2.66	1.54e-14	6.48e-13	IL24	interleukin 24	Multiple_Complex
TC2200008637.hg.1	9.96	11.34	-2.61	7.75e-13	2.53e-11	IL2RB	interleukin 2 receptor, beta	Multiple_Complex
TC1600007312.hg.1	12.25	10.62	3.09	5.94e-09	1.08e-07	IL4R	interleukin 4 receptor	Multiple_Complex
TC0300013923.hg.1	6.08	7.86	-3.44	8.34e-12	2.39e-10	IL5RA	interleukin 5 receptor, alpha	Multiple_Complex
TC0100015916.hg.1	6.95	5.59	2.56	9.5e-08	1.4e-06	IL6R	Memczak2013 ANTISENSE, coding, INTERNAL, UTR3 best transcript NM_000565	NonCoding
TC0100010078.hg.1	7.32	4.72	6.09	1.02e-20	1.02e-18	IL6R	interleukin 6 receptor	Multiple_Complex
TC0500010788.hg.1	11.66	8.66	8.01	1.12e-18	8.1e-17	IL6ST	interleukin 6 signal transducer	Multiple_Complex
TC0300011047.hg.1	14.33	12.45	3.67	2.37e-26	4.45e-24	IMPDH2	IMP (inosine 5-monophosphate) dehydrogenase 2	Multiple_Complex
TC0100008536.hg.1	8.88	7.84	2.05	6.69e-07	8.3e-06	INADL	InaD-like (Drosophila)	Multiple_Complex
TC1000009414.hg.1	6.48	4.99	2.8	2.27e-09	4.41e-08	INPP5A	inositol polyphosphate-5-phosphatase A	Multiple_Complex
TSUnmapped00000401.hg.1	8.33	10.74	-5.32	4.51e-10	9.99e-09	INPP5D	inositol polyphosphate-5-phosphatase D	NonCoding
TSUnmapped00000290.hg.1	6.46	8.79	-5.01	2.86e-11	7.54e-10	INPP5D	inositol polyphosphate-5-phosphatase D	NonCoding
TSUnmapped00000135.hg.1	11.67	13.45	-3.45	1.58e-13	5.68e-12	INPP5D	inositol polyphosphate-5-phosphatase D	Coding
TSUnmapped00000661.hg.1	10.18	11.84	-3.16	4e-13	1.37e-11	INPP5D	inositol polyphosphate-5-phosphatase D	Coding
TSUnmapped00000446.hg.1	8.04	9.6	-2.94	2.79e-10	6.4e-09	INPP5D	inositol polyphosphate-5-phosphatase D	Coding
TSUnmapped00000580.hg.1	5.67	7.05	-2.6	3.46e-10	7.83e-09	INPP5D	inositol polyphosphate-5-phosphatase D	NonCoding
TSUnmapped00000419.hg.1	5.3	6.62	-2.49	1.32e-08	2.25e-07	INPP5D	inositol polyphosphate-5-phosphatase D	NonCoding
TC0200011121.hg.1	11.07	12.36	-2.45	1.38e-10	3.31e-09	INPP5D	inositol polyphosphate-5-phosphatase D	Multiple_Complex
TSUnmapped00000377.hg.1	11.72	12.83	-2.16	4.11e-10	9.16e-09	INPP5D	inositol polyphosphate-5-phosphatase D	NonCoding
TC0200016166.hg.1	5.16	3.74	2.68	4.92e-10	1.09e-08	IQCA1	IQ motif containing with AAA domain 1	Multiple_Complex
TC1500008312.hg.1	10.63	12.3	-3.17	3.61e-18	2.44e-16	IQGAP1	IQ motif containing GTPase activating protein 1	Multiple_Complex
TC0500007826.hg.1	7.38	9.53	-4.43	6.8e-15	3.03e-13	IQGAP2	IQ motif containing GTPase activating protein 2	Multiple_Complex
TC0300010315.hg.1	5.11	6.35	-2.36	6.84e-10	1.46e-08	IQSEC1	IQ motif and Sec7 domain 1	Multiple_Complex
TC1200006438.hg.1	6.9	5.44	2.76	1.19e-08	2.05e-07	IQSEC3	IQ motif and Sec7 domain 3	Multiple_Complex
TC0200015912.hg.1	6.64	5.17	2.77	3.55e-14	1.42e-12	IRS1	insulin receptor substrate 1	Multiple_Complex
TC1500008232.hg.1	14.15	13.14	2.01	8.13e-07	9.84e-06	ISG20	interferon stimulated exonuclease gene 20kDa	Multiple_Complex
TC1900010016.hg.1	9.68	7.57	4.32	2.92e-14	1.18e-12	ISYNA1	inositol-3-phosphate synthase 1	Multiple_Complex
TC0200010157.hg.1	8.09	10.61	-5.72	1.42e-13	5.18e-12	ITGA4	integrin alpha 4	Multiple_Complex
TC1200010839.hg.1	8.18	10.06	-3.67	3.17e-12	9.59e-11	ITGA5	integrin alpha 5	Multiple_Complex
TC1600007470.hg.1	5.91	8.68	-6.84	5.4e-15	2.45e-13	ITGAL	integrin alpha L	Multiple_Complex
TC1600007528.hg.1	5.31	6.44	-2.18	1.95e-07	2.7e-06	ITGAM	integrin, alpha M (complement component 3 receptor 3 subunit)	Multiple_Complex
TC1000010265.hg.1	11.17	15.12	-15.44	7.78e-22	9.12e-20	ITGB1	integrin beta 1	Multiple_Complex
TC2100008392.hg.1	7.52	9.68	-4.49	1.53e-15	7.39e-14	ITGB2	integrin, beta 2 (complement component 3 receptor 3 and 4 subunit)	Multiple_Complex
TC0300013994.hg.1	7.57	8.94	-2.58	1.52e-06	1.74e-05	ITIH4	inter-alpha-trypsin inhibitor heavy chain family, member 4	Multiple_Complex
TC0200011040.hg.1	14.41	12.67	3.34	2.26e-08	3.69e-07	ITM2C	integral membrane protein 2C	Multiple_Complex
TC0100017534.hg.1	8.67	7.36	2.48	1.72e-11	4.68e-10	ITPKB	inositol-trisphosphate 3-kinase B	Multiple_Complex
TC0600007711.hg.1	7.38	8.43	-2.08	2.6e-06	2.82e-05	ITPR3	inositol 1,4,5-trisphosphate receptor, type 3	Multiple_Complex
TC0200008501.hg.1	5.18	8.46	-9.72	1.05e-22	1.35e-20	ITPRIPL1	inositol 1,4,5-trisphosphate receptor interacting protein-like 1	Coding
TC0900006539.hg.1	7.24	8.29	-2.07	0.0082	0.0282	JAK2	Memczak2013 ALT_ACCEPTOR, ALT_DONOR, coding, INTERNAL, intronic best transcript NM_004972	NonCoding
TC0400009897.hg.1	4.68	8.67	-15.83	3.94e-28	8.71e-26	JAKMIP1	janus kinase and microtubule interacting protein 1	Multiple_Complex
TC0500012390.hg.1	4.35	8.26	-15.05	2.45e-23	3.5e-21	JAKMIP2	janus kinase and microtubule interacting protein 2	Multiple_Complex
TC1100009611.hg.1	7.27	6.03	2.37	3.34e-09	6.32e-08	JAM3	junctional adhesion molecule 3	Multiple_Complex
TC0700007031.hg.1	5.19	7.06	-3.68	4.71e-09	8.72e-08	JAZF1	Memczak2013 ANTISENSE, coding, INTERNAL, intronic best transcript NM_175061	NonCoding
TC0700010585.hg.1	7.64	8.95	-2.48	5.94e-12	1.73e-10	JAZF1	JAZF zinc finger 1	Multiple_Complex
TC0900006442.hg.1	5.51	4.47	2.06	1.06e-06	1.25e-05	KANK1	KN motif and ankyrin repeat domains 1	Multiple_Complex
TC1700010910.hg.1	11.59	12.65	-2.08	1.07e-08	1.87e-07	KANSL1	KAT8 regulatory NSL complex subunit 1	Multiple_Complex
TC0300006791.hg.1	9.94	11.88	-3.83	5.94e-22	7.03e-20	KAT2B	K(lysine) acetyltransferase 2B	Multiple_Complex
TC0300006793.hg.1	5.8	7.06	-2.39	2.8e-07	3.76e-06	KAT2B	Transcript Identified by AceView, Entrez Gene ID(s) 8850	Unassigned
TC1300008511.hg.1	4.21	5.7	-2.8	1.28e-07	1.85e-06	KATNAL1	katanin p60 subunit A-like 1	Multiple_Complex
TC0100015246.hg.1	10.57	11.62	-2.07	4.91e-07	6.26e-06	KCNA3	potassium channel, voltage gated shaker related subfamily A, member 3	Multiple_Complex
TC1200008165.hg.1	5.79	4.53	2.4	2.11e-12	6.53e-11	KCNMB4	potassium channel subfamily M regulatory beta subunit 4	Multiple_Complex
TC1900010864.hg.1	9.08	7.3	3.44	7.34e-11	1.82e-09	KCNN4	potassium channel, calcium activated intermediate/small conductance subfamily N alpha, member 4	Multiple_Complex
TC1100006580.hg.1	6.74	5.51	2.34	4.39e-15	2.02e-13	KCNQ1	potassium channel, voltage gated KQT-like subfamily Q, member 1	Multiple_Complex
TC0600008509.hg.1	6.48	5.46	2.03	2.92e-06	3.11e-05	KCNQ5	potassium channel, voltage gated KQT-like subfamily Q, member 5	Multiple_Complex
TC1200011870.hg.1	7.54	8.73	-2.29	7.37e-07	9.01e-06	KCTD10	potassium channel tetramerization domain containing 10	Multiple_Complex
TC1600009944.hg.1	9.51	11.32	-3.51	1.42e-07	2.04e-06	KCTD13	potassium channel tetramerization domain containing 13	Multiple_Complex
TC0700013382.hg.1	5.79	6.94	-2.22	5.76e-08	8.81e-07	KCTD7	potassium channel tetramerization domain containing 7	Multiple_Complex
TC1200012206.hg.1	10.55	12.28	-3.31	4.59e-09	8.52e-08	KDM2B	lysine (K)-specific demethylase 2B	Multiple_Complex
TC1200009550.hg.1	6.75	7.95	-2.29	3.6e-06	3.76e-05	KDM5A	lysine (K)-specific demethylase 5A	Multiple_Complex
TC1800008903.hg.1	8.69	7.17	2.86	7.9e-14	2.97e-12	KDSR	3-ketodihydrosphingosine reductase	Multiple_Complex
TC1400010595.hg.1	10.35	8.91	2.71	1.12e-11	3.12e-10	KIAA0391	KIAA0391	Multiple_Complex
TC1600007317.hg.1	6.64	7.64	-2	0.0001	0.001	KIAA0556	KIAA0556	Multiple_Complex
TC0500011478.hg.1	4.8	6.13	-2.52	1.28e-07	1.85e-06	KIAA0825	KIAA0825	Multiple_Complex
TC0400008609.hg.1	7.83	9.06	-2.35	6.45e-08	9.74e-07	KIAA1109	KIAA1109	Multiple_Complex
TC2200006908.hg.1	4.99	6	-2.02	1.74e-10	4.1e-09	KIAA1671	KIAA1671	Multiple_Complex
TC1900010008.hg.1	6.89	8.7	-3.52	6.87e-07	8.49e-06	KIAA1683	KIAA1683	Multiple_Complex
TC0200016454.hg.1	4.79	6.37	-2.99	1.9e-11	5.1e-10	KIAA1841	KIAA1841	Multiple_Complex
TC0900008467.hg.1	7.79	6.52	2.42	2.26e-08	3.69e-07	KIAA1958	KIAA1958	Multiple_Complex
TC0900012201.hg.1	5.18	6.57	-2.62	3.5e-08	5.55e-07	KIAA2026	KIAA2026	NonCoding
TC0900012202.hg.1	10.04	11.26	-2.34	2.75e-09	5.27e-08	KIAA2026	KIAA2026	Multiple_Complex
TC0200016624.hg.1	8.06	9.36	-2.46	2.23e-07	3.07e-06	KIDINS220	kinase D-interacting substrate 220kDa	Multiple_Complex
TC0100006812.hg.1	4.27	6.58	-4.95	3.4e-10	7.71e-09	KIF1B	kinesin family member 1B	Multiple_Complex
TC1200010407.hg.1	5.54	8.46	-7.56	6.77e-21	6.98e-19	KIF21A	kinesin family member 21A	Multiple_Complex
TC0100016899.hg.1	6.88	8.09	-2.32	2.39e-07	3.27e-06	KIF21B	kinesin family member 21B	Multiple_Complex
TC1600007425.hg.1	6.94	8.25	-2.48	1.25e-09	2.56e-08	KIF22	kinesin family member 22	Multiple_Complex
TC0200009616.hg.1	8.33	6.97	2.57	3.81e-07	5e-06	KIF5C	kinesin family member 5C	Multiple_Complex
TC1900008879.hg.1	5.6	8.5	-7.46	3.06e-13	1.06e-11	KIR2DS5; KIR3DL2; KIR2DL1; KIR3DL3; KIR3DL1; KIR2DS4; KIR2DL3; KIR3DS1; KIR2DS2; KIR2DP1; KIR3DP1	killer cell immunoglobulin-like receptor, two domains, short cytoplasmic tail, 5; killer cell immunoglobulin-like receptor, three domains, long cytoplasmic tail, 2; killer cell immunoglobulin-like receptor, two domains, long cytoplasmic tail, 1; killer cell immunoglobulin-like receptor, three domains, long cytoplasmic tail, 3; killer cell immunoglobulin-like receptor, three domains, long cytoplas…	Multiple_Complex
TC1900008864.hg.1	4.1	5.15	-2.06	9.77e-05	0.0007	KIR3DX1	killer cell immunoglobulin-like receptor, three domains, X1	Multiple_Complex
TC0200006674.hg.1	5.18	6.45	-2.41	0.0005	0.0027	KLF11	Kruppel-like factor 11	Multiple_Complex
TC1000009612.hg.1	12.97	14.86	-3.71	9.58e-14	3.56e-12	KLF6	Kruppel-like factor 6	Multiple_Complex
TC0200015538.hg.1	12.65	10.14	5.7	6.65e-13	2.18e-11	KLF7	Kruppel-like factor 7 (ubiquitous)	Multiple_Complex
TC1600011582.hg.1	6.92	7.99	-2.1	1.29e-08	2.21e-07	KLHDC4	kelch domain containing 4	Multiple_Complex
TC0300007290.hg.1	5.46	6.52	-2.09	0.0006	0.0034	KLHL18	kelch-like family member 18	Multiple_Complex
TC0300013344.hg.1	8.21	5.83	5.2	6.65e-14	2.54e-12	KLHL6	kelch-like family member 6	Multiple_Complex
TC1200009910.hg.1	4.25	7.55	-9.85	5.81e-18	3.74e-16	KLRAP1	killer cell lectin-like receptor subfamily A pseudogene 1	Multiple_Complex
TC1200009872.hg.1	5.28	12	-105.94	1.09e-30	3.44e-28	KLRB1	killer cell lectin-like receptor subfamily B, member 1	Coding
TC1200012754.hg.1	4.53	6.25	-3.29	1.58e-08	2.65e-07	KLRC1	killer cell lectin-like receptor subfamily C, member 1	Multiple_Complex
TC1200012753.hg.1	7.1	10.71	-12.22	5.18e-14	2e-12	KLRC2	killer cell lectin-like receptor subfamily C, member 2	Coding
TC1200012752.hg.1	8.8	11.69	-7.42	3.02e-09	5.75e-08	KLRC3	killer cell lectin-like receptor subfamily C, member 3	Coding
TC1200006788.hg.1	6.12	13.88	-216.46	1.12e-43	2.67e-40	KLRD1	killer cell lectin-like receptor subfamily D, member 1	Multiple_Complex
TC1200006773.hg.1	5.7	9.96	-19.13	4.76e-32	1.85e-29	KLRF1	killer cell lectin-like receptor subfamily F, member 1	Multiple_Complex
TC1200006738.hg.1	6.51	13.64	-140.47	8.28e-37	5.38e-34	KLRG1	killer cell lectin-like receptor subfamily G, member 1	Multiple_Complex
TC0700013102.hg.1	10.36	11.43	-2.1	2.68e-05	0.0002	KMT2C	lysine (K)-specific methyltransferase 2C	Multiple_Complex
TC1200007108.hg.1	8.26	9.31	-2.07	0.0002	0.0011	KRAS	Memczak2013 ANTISENSE, coding, INTERNAL, intronic best transcript NM_033360	NonCoding
TC1200007686.hg.1	6.32	4.7	3.07	1.11e-11	3.1e-10	KRT18	keratin 18, type I	Multiple_Complex
TC1200010764.hg.1	5.45	3.88	2.97	5.65e-09	1.03e-07	KRT73	keratin 73, type II	Multiple_Complex
TC1100009745.hg.1	7.86	8.95	-2.12	8.14e-06	7.69e-05	KRTAP5-1	keratin associated protein 5-1	Coding
TC1100011520.hg.1	7.19	8.2	-2.01	2.81e-09	5.38e-08	KRTAP5-11	keratin associated protein 5-11	Multiple_Complex
TC1100009746.hg.1	6.34	8.14	-3.5	4.25e-15	1.96e-13	KRTAP5-2	keratin associated protein 5-2	Coding
TC1100013127.hg.1	5.96	6.99	-2.04	1.85e-08	3.07e-07	KRTAP5-4	keratin associated protein 5-4	Coding
TC1400010757.hg.1	9.81	10.87	-2.08	0.0125	0.0394	L3HYPDH	L-3-hydroxyproline dehydratase (trans-)	Multiple_Complex
TC0600009436.hg.1	6.58	7.65	-2.1	0.0003	0.0019	L3MBTL3	l(3)mbt-like 3 (Drosophila)	Multiple_Complex
TC0800010766.hg.1	8.41	7.41	2	3.93e-07	5.13e-06	LACTB2	lactamase, beta 2	Multiple_Complex
TC1200006644.hg.1	4.9	6.15	-2.38	1.07e-09	2.23e-08	LAG3	lymphocyte-activation gene 3	Multiple_Complex
TC1900008862.hg.1	7.07	8.25	-2.28	0.0013	0.006	LAIR2	leukocyte-associated immunoglobulin-like receptor 2	Coding
TC0300013336.hg.1	8.56	6.22	5.06	6.63e-08	1e-06	LAMP3	lysosomal-associated membrane protein 3	Multiple_Complex
TC0400006987.hg.1	9.01	10.03	-2.03	0.0003	0.0018	LAP3	leucine aminopeptidase 3	Multiple_Complex
TC0800008321.hg.1	4.55	3.5	2.08	1.1e-07	1.61e-06	LAPTM4B	lysosomal protein transmembrane 4 beta	Multiple_Complex
TC1700007725.hg.1	11.82	12.94	-2.17	4.3e-08	6.72e-07	LASP1	LIM and SH3 protein 1	Multiple_Complex
TC0100011270.hg.1	6.86	9.35	-5.63	1.92e-13	6.84e-12	LAX1	lymphocyte transmembrane adaptor 1	Multiple_Complex
TC1100009024.hg.1	7.19	3.93	9.62	1.47e-22	1.87e-20	LAYN	layilin	Multiple_Complex
TC0200007144.hg.1	9.69	8.47	2.34	5.63e-06	5.56e-05	LCLAT1	lysocardiolipin acyltransferase 1	Multiple_Complex
TC0400010168.hg.1	9.61	11.53	-3.8	3.8e-15	1.77e-13	LCORL	ligand dependent nuclear receptor corepressor like	Multiple_Complex
TC1300008840.hg.1	15.15	16.47	-2.49	4.84e-16	2.48e-14	LCP1	lymphocyte cytosolic protein 1 (L-plastin)	Multiple_Complex
TC1200010109.hg.1	13.06	10.61	5.47	2.11e-31	7.19e-29	LDHB	lactate dehydrogenase B	Multiple_Complex
TC1800006757.hg.1	11.98	9.8	4.52	5.91e-09	1.07e-07	LDLRAD4	low density lipoprotein receptor class A domain containing 4	Multiple_Complex
TC0100007406.hg.1	12.92	8.89	16.31	4.25e-32	1.69e-29	LDLRAP1	low density lipoprotein receptor adaptor protein 1	Multiple_Complex
TC0X00010989.hg.1	7.35	5.3	4.16	1.09e-11	3.06e-10	LDOC1	leucine zipper, down-regulated in cancer 1	Multiple_Complex
TC0400011548.hg.1	15.22	10.03	36.53	1.66e-39	1.87e-36	LEF1	lymphoid enhancer-binding factor 1	Multiple_Complex
TC1900008860.hg.1	14.1	15.3	-2.29	1.29e-05	0.0001	LENG8	leukocyte receptor cluster (LRC) member 8	Multiple_Complex
TC0800012287.hg.1	14.39	12.86	2.89	1.96e-16	1.05e-14	LEPROTL1	leptin receptor overlapping transcript-like 1	Multiple_Complex
TC2200007312.hg.1	11.55	14.49	-7.71	2.9e-17	1.7e-15	LGALS1	lectin, galactoside-binding, soluble, 1	Multiple_Complex
TC1400010012.hg.1	8.39	5.99	5.26	2.39e-18	1.65e-16	LGMN	legumain	Multiple_Complex
TC0100011215.hg.1	4.64	7.05	-5.31	1.06e-16	5.84e-15	LGR6	leucine-rich repeat containing G protein-coupled receptor 6	Multiple_Complex
TC1900011799.hg.1	6.14	9.71	-11.9	1.1e-20	1.09e-18	LILRB1	leukocyte immunoglobulin-like receptor, subfamily B (with TM and ITIM domains), member 1	Multiple_Complex
TC0300007237.hg.1	6.88	8.24	-2.58	6.28e-07	7.81e-06	LIMD1	LIM domains containing 1	Multiple_Complex
TC0700011508.hg.1	9.16	10.92	-3.37	4.34e-10	9.64e-09	LIMK1	Memczak2013 ANTISENSE, CDS, coding, INTERNAL best transcript NM_001204426	NonCoding
TC0700007997.hg.1	7.73	8.99	-2.41	3.92e-08	6.19e-07	LIMK1	LIM domain kinase 1	Multiple_Complex
TC0100011269.hg.1	6.72	9.63	-7.53	4e-14	1.58e-12	LINC00260	long intergenic non-protein coding RNA 260	Multiple_Complex
TC1300008998.hg.1	5.6	4.16	2.71	1.67e-11	4.56e-10	LINC00282	long intergenic non-protein coding RNA 282	NonCoding
TC2000009895.hg.1	12.84	11.48	2.58	1.97e-11	5.29e-10	LINC00493	long intergenic non-protein coding RNA 493	Multiple_Complex
TC1200009846.hg.1	6.82	12.96	-70.63	1.45e-27	3.02e-25	LINC00612	long intergenic non-protein coding RNA 612	Multiple_Complex
TC1400010748.hg.1	6.71	8.12	-2.67	8.62e-07	1.04e-05	LINC01588	long intergenic non-protein coding RNA 1588	Multiple_Complex
TC1600011483.hg.1	12.04	13.12	-2.12	1.33e-08	2.26e-07	LITAF	lipopolysaccharide-induced TNF factor	Multiple_Complex
TC0100010152.hg.1	5.16	6.22	-2.08	3.49e-05	0.0003	LMNA	lamin A/C	Multiple_Complex
TC1300009980.hg.1	8.39	5.76	6.16	2.7e-13	9.41e-12	LMO7	LIM domain 7	Multiple_Complex
TC2200009352.hg.1	6.79	9.04	-4.76	5.51e-09	1.01e-07	LOC400927; CSNK1E	TPTE and PTEN homologous inositol lipid phosphatase pseudogene; Transcript Identified by AceView, Entrez Gene ID(s) 1454; 400927	Multiple_Complex
TC0500013271.hg.1	9.44	8.41	2.05	2.04e-07	2.83e-06	LOC728554; THOC3	THO complex 3 pseudogene; Homo sapiens THO complex 3, mRNA (cDNA clone MGC:5469 IMAGE:3451612), complete cds.; Homo sapiens THO complex 3, mRNA (cDNA clone MGC:87233 IMAGE:5262880), complete cds.; Salzman2013 ANNOTATED, INTERNAL, ncRNA, OVERLAPTX, OVEXON best transcript NR_003615; Transcript Identified by AceView, Entrez Gene ID(s) 728554	Multiple_Complex
TC0100009112.hg.1	6.92	4.94	3.97	2.27e-19	1.82e-17	LOC729970; RP4-639F20.1	hCG2028352-like; novel transcript	NonCoding
TC1700007152.hg.1	6.23	4.69	2.91	5.34e-10	1.17e-08	LOC79999; LOC388436; AC007952.5	Homo sapiens uncharacterized LOC79999 (LOC79999), mRNA.; uncharacterized protein ENSP00000382042; novel transcript	Multiple_Complex
TC1700010004.hg.1	7.76	5.88	3.68	2.3e-11	6.1e-10	LOC79999; LOC388436; AC007952.6	Homo sapiens uncharacterized LOC79999 (LOC79999), mRNA.; Homo sapiens uncharacterized protein ENSP00000382042 (LOC388436), mRNA.; novel transcript antisense to GRAPL	Multiple_Complex
TC1700012206.hg.1	7.41	5.19	4.68	9.42e-12	2.66e-10	LOC79999; LOC388436; RP11-744A16.4	uncharacterized LOC79999; Homo sapiens uncharacterized protein ENSP00000382042 (LOC388436), mRNA.; novel transcript	Multiple_Complex
TC1200009744.hg.1	5.8	6.9	-2.15	7.95e-06	7.54e-05	LPAR5	lysophosphatidic acid receptor 5	Multiple_Complex
TC1300008892.hg.1	9.87	13.13	-9.57	5.23e-20	4.77e-18	LPAR6	lysophosphatidic acid receptor 6	Multiple_Complex
TC0500009863.hg.1	4.13	6.37	-4.73	4.74e-14	1.85e-12	LPCAT1	lysophosphatidylcholine acyltransferase 1	Multiple_Complex
TC1500008986.hg.1	7.87	9.37	-2.82	3.23e-07	4.31e-06	LPCAT4	lysophosphatidylcholine acyltransferase 4	Multiple_Complex
TC0100017223.hg.1	5.44	6.97	-2.89	6.18e-15	2.79e-13	LPGAT1	lysophosphatidylglycerol acyltransferase 1	Multiple_Complex
TSUnmapped00000106.hg.1	5.87	4.51	2.57	7.1e-11	1.76e-09	LRP6	LDL receptor related protein 6	NonCoding
TSUnmapped00000012.hg.1	4.6	3.11	2.82	1.42e-09	2.87e-08	LRP6	LDL receptor related protein 6	Coding
TC1200009959.hg.1	5.73	3.94	3.47	1.74e-16	9.36e-15	LRP6	LDL receptor related protein 6	Multiple_Complex
TSUnmapped00000267.hg.1	5.8	3.74	4.19	9.9e-15	4.29e-13	LRP6	LDL receptor related protein 6	Coding
TSUnmapped00000154.hg.1	7.05	4.23	7.06	4.24e-23	5.76e-21	LRP6	LDL receptor related protein 6	Coding
TC0100014228.hg.1	6.78	8.19	-2.65	3.52e-06	3.68e-05	LRP8	LDL receptor related protein 8	Multiple_Complex
TC0200012418.hg.1	13.04	11.8	2.36	4.08e-06	4.19e-05	LRPPRC	leucine-rich pentatricopeptide repeat containing	Multiple_Complex
TC0600007231.hg.1	6.71	5.32	2.63	8.93e-09	1.58e-07	LRRC16A	leucine rich repeat containing 16A	Multiple_Complex
TC1700008095.hg.1	12.59	13.64	-2.07	0.0001	0.0007	LRRC37A	leucine rich repeat containing 37A	Multiple_Complex
TC0100018247.hg.1	10.87	8.34	5.76	2.62e-18	1.81e-16	LRRC8D	leucine rich repeat containing 8 family, member D	Multiple_Complex
TC0300006465.hg.1	5.53	4.43	2.15	4.55e-07	5.86e-06	LRRN1	leucine rich repeat neuronal 1	Multiple_Complex
TC0700008809.hg.1	12.26	6.75	45.53	1.65e-28	4.01e-26	LRRN3	leucine rich repeat neuronal 3	Multiple_Complex
TC0900008805.hg.1	5.68	6.92	-2.35	2.02e-05	0.0002	LRSAM1	leucine rich repeat and sterile alpha motif containing 1	Multiple_Complex
TC0700010678.hg.1	10.44	8.91	2.89	1.34e-09	2.72e-08	LSM5	LSM5 homolog, U6 small nuclear RNA and mRNA degradation associated	Multiple_Complex
TC1900007844.hg.1	7.69	5.48	4.62	3.43e-19	2.63e-17	LSR	lipolysis stimulated lipoprotein receptor	Multiple_Complex
TC1200011599.hg.1	11.73	10.38	2.56	2.99e-14	1.21e-12	LTA4H	leukotriene A4 hydrolase	Multiple_Complex
TC0600011438.hg.1	15.26	10.32	30.65	4.79e-27	9.17e-25	LTB	lymphotoxin beta (TNF superfamily, member 3)	Multiple_Complex
TC1900008113.hg.1	5.4	6.65	-2.38	1.24e-05	0.0001	LTBP4	latent transforming growth factor beta binding protein 4	Multiple_Complex
TC0700012712.hg.1	10.39	11.49	-2.14	3.34e-14	1.34e-12	LUZP6; MTPN	leucine zipper protein 6; myotrophin	Multiple_Complex
TC0600011445.hg.1	4.87	6.46	-3	5.52e-07	6.95e-06	LY6G5C	lymphocyte antigen 6 complex, locus G5C	Multiple_Complex
TC0200014728.hg.1	7.84	8.87	-2.05	2.03e-06	2.26e-05	LY75-CD302; CD302; LY75	LY75-CD302 readthrough; CD302 molecule; lymphocyte antigen 75	Multiple_Complex
TC0100010314.hg.1	7.82	9.35	-2.87	5.7e-10	1.24e-08	LY9	lymphocyte antigen 9	Multiple_Complex
TC0800007978.hg.1	7.59	4.47	8.66	6.52e-20	5.73e-18	LY96	lymphocyte antigen 96	Coding
TC0400009856.hg.1	10.75	12.3	-2.93	1.61e-11	4.4e-10	LYAR	Ly1 antibody reactive	Multiple_Complex
TC0800007688.hg.1	5.32	6.39	-2.11	5.87e-08	8.98e-07	LYN	LYN proto-oncogene, Src family tyrosine kinase	Multiple_Complex
TC1900010847.hg.1	5.53	4.16	2.59	2.37e-13	8.32e-12	LYPD3	LY6/PLAUR domain containing 3	Multiple_Complex
TC1200007105.hg.1	8.9	7.21	3.22	1.34e-10	3.21e-09	LYRM5	LYR motif containing 5	Multiple_Complex
TC0500008602.hg.1	9.48	8.36	2.16	3.36e-07	4.46e-06	LYRM7	LYR motif containing 7	Multiple_Complex
TC1500009438.hg.1	7.74	6.51	2.35	2.1e-08	3.45e-07	LYSMD2	LysM, putative peptidoglycan-binding, domain containing 2	Coding
TC0100017836.hg.1	12.05	15.62	-11.86	6.99e-24	1.03e-21	LYST	lysosomal trafficking regulator	Multiple_Complex
TC0100007898.hg.1	13.28	14.84	-2.95	1.18e-07	1.72e-06	MACF1; KIAA0754	microtubule-actin crosslinking factor 1; KIAA0754	Multiple_Complex
TC0600008102.hg.1	12.28	11.18	2.15	4.23e-10	9.38e-09	MAD2L1BP	MAD2L1 binding protein	Multiple_Complex
TC1600010951.hg.1	5.26	10.26	-31.94	2.69e-39	2.75e-36	MAF	v-maf avian musculoaponeurotic fibrosarcoma oncogene homolog	Coding
TC0300013400.hg.1	8.47	7.1	2.59	9.84e-17	5.47e-15	MAGEF1	MAGE family member F1	Coding
TC0X00007378.hg.1	9.66	8.5	2.22	1.35e-11	3.73e-10	MAGEH1	MAGE family member H1	Coding
TC0200008452.hg.1	12.54	6.23	79.24	2.98e-37	2.06e-34	MAL	mal, T-cell differentiation protein	Multiple_Complex
TC0700006915.hg.1	10.63	9.5	2.18	4.58e-08	7.13e-07	MALSU1	mitochondrial assembly of ribosomal large subunit 1	Multiple_Complex
TC0500013277.hg.1	9.69	10.79	-2.14	9.39e-05	0.0007	MAML1	mastermind-like transcriptional coactivator 1	Multiple_Complex
TC1100012037.hg.1	10.36	9.07	2.44	1.4e-08	2.36e-07	MAML2	mastermind-like transcriptional coactivator 2	Multiple_Complex
TC0X00008712.hg.1	3.85	4.92	-2.09	2.07e-06	2.29e-05	MAMLD1	mastermind-like domain containing 1	Multiple_Complex
TC0100007412.hg.1	11.42	8.02	10.58	1.12e-26	2.12e-24	MAN1C1	mannosidase, alpha, class 1C, member 1	Multiple_Complex
TC0400006689.hg.1	8.49	9.8	-2.48	1.6e-07	2.27e-06	MAN2B2	mannosidase, alpha, class 2B, member 2	Multiple_Complex
TC0600013280.hg.1	7.03	9.02	-3.96	9.09e-16	4.51e-14	MAP3K5	mitogen-activated protein kinase kinase kinase 5	Multiple_Complex
TC1000007176.hg.1	7.15	10.54	-10.54	2.11e-20	2.03e-18	MAP3K8	mitogen-activated protein kinase kinase kinase 8	Multiple_Complex
TC0300010999.hg.1	9.31	10.52	-2.32	4.02e-08	6.33e-07	MAP4	microtubule associated protein 4	Multiple_Complex
TC1900010612.hg.1	10.57	11.98	-2.66	1.31e-08	2.23e-07	MAP4K1	mitogen-activated protein kinase kinase kinase kinase 1	Multiple_Complex
TC1400009131.hg.1	8.99	10.92	-3.8	4.32e-20	3.96e-18	MAP4K5	mitogen-activated protein kinase kinase kinase kinase 5	Multiple_Complex
TC2200008105.hg.1	11.26	12.89	-3.1	6.1e-19	4.49e-17	MAPK1	mitogen-activated protein kinase 1	Multiple_Complex
TC0100011384.hg.1	9.94	11.23	-2.45	1.22e-12	3.88e-11	MAPKAPK2	mitogen-activated protein kinase-activated protein kinase 2	Multiple_Complex
TC0500011935.hg.1	6.37	4.91	2.75	3.6e-07	4.76e-06	MARCH3	membrane associated ring finger 3	Multiple_Complex
TC1400008397.hg.1	9.02	10.09	-2.1	9.93e-05	0.0007	MARK3	MAP/microtubule affinity-regulating kinase 3	Multiple_Complex
TC1900011766.hg.1	10.46	11.81	-2.55	8.67e-11	2.14e-09	MARK4	MAP/microtubule affinity-regulating kinase 4	Multiple_Complex
TC1200012650.hg.1	7.74	8.83	-2.12	0.0001	0.0008	MARS; MIR6758	methionyl-tRNA synthetase; microRNA 6758	Multiple_Complex
TC0500007676.hg.1	5.54	4.42	2.17	2.51e-07	3.42e-06	MARVELD2	MARVEL domain containing 2	Multiple_Complex
TC0500007623.hg.1	10.05	7.68	5.17	3.55e-21	3.81e-19	MAST4	microtubule associated serine/threonine kinase family member 4	Multiple_Complex
TC0600012293.hg.1	6.89	8.15	-2.4	5.92e-07	7.39e-06	MB21D1	Mab-21 domain containing 1	Multiple_Complex
TC0300013555.hg.1	5.52	3.98	2.9	1.88e-08	3.11e-07	MB21D2	Mab-21 domain containing 2	Coding
TC1400008963.hg.1	10.23	9.06	2.25	8.24e-08	1.23e-06	MBIP	MAP3K12 binding inhibitory protein 1	Multiple_Complex
TC0800010021.hg.1	6	4.84	2.23	1.84e-09	3.65e-08	MBOAT4	membrane bound O-acyltransferase domain containing 4	Coding
TC1800009112.hg.1	8.08	10.74	-6.31	3.91e-22	4.68e-20	MBP	myelin basic protein	Multiple_Complex
TC0100014768.hg.1	4.64	8.11	-11.04	1.38e-15	6.69e-14	MCOLN2	mucolipin 2	Multiple_Complex
TC0100014769.hg.1	4.61	6.12	-2.85	0.0008	0.004	MCOLN3	mucolipin 3	Multiple_Complex
TC1500010792.hg.1	5.29	8.09	-6.97	1.39e-20	1.37e-18	MCTP2	multiple C2 domains, transmembrane 2	Multiple_Complex
TC1000008005.hg.1	6.92	8.07	-2.21	1.51e-06	1.73e-05	MCU	mitochondrial calcium uniporter	Multiple_Complex
TC0700008857.hg.1	6.89	7.97	-2.12	1.25e-06	1.45e-05	MDFIC	MyoD family inhibitor domain containing	Multiple_Complex
TC0600011704.hg.1	4.84	6.55	-3.28	4.46e-05	0.0003	MDGA1	MAM domain containing glycosylphosphatidylinositol anchor 1	Multiple_Complex
TC2200009194.hg.1	11.74	12.87	-2.19	7.07e-07	8.69e-06	MED15	mediator complex subunit 15	Multiple_Complex
TC0400006990.hg.1	10.95	9.79	2.24	1.25e-06	1.46e-05	MED28	mediator complex subunit 28	Multiple_Complex
TC1700009293.hg.1	8.42	12.68	-19.14	7.89e-23	1.03e-20	METRNL	meteorin, glial cell differentiation regulator-like	Multiple_Complex
TC1400008636.hg.1	7.96	9.2	-2.35	1.83e-07	2.57e-06	METTL3	methyltransferase like 3	Multiple_Complex
TC1200007626.hg.1	6.16	7.85	-3.22	7.82e-06	7.44e-05	METTL7A	methyltransferase like 7A	Coding
TC1800008707.hg.1	8.22	9.49	-2.42	1.21e-09	2.48e-08	MEX3C	mex-3 RNA binding family member C	Multiple_Complex
TC0400009790.hg.1	10.34	12.37	-4.09	1.85e-18	1.3e-16	MFSD10	major facilitator superfamily domain containing 10	Multiple_Complex
TC0400011815.hg.1	9.46	10.65	-2.28	7.76e-05	0.0006	MFSD8	major facilitator superfamily domain containing 8	Multiple_Complex
TC1000011660.hg.1	8.99	10.33	-2.53	0.0003	0.0019	MGEA5	Salzman2013 ALT_ACCEPTOR, ALT_DONOR, coding, INTERNAL, intronic best transcript NM_012215	NonCoding
TC1000011659.hg.1	8.16	9.32	-2.24	2.63e-06	2.84e-05	MGEA5	meningioma expressed antigen 5 (hyaluronidase)	Multiple_Complex
TC2000006813.hg.1	6.73	7.99	-2.41	4e-06	4.12e-05	MGME1	mitochondrial genome maintenance exonuclease 1	Multiple_Complex
TC1100012966.hg.1	6.52	8.17	-3.15	1.29e-10	3.12e-09	MICAL2	microtubule associated monooxygenase, calponin and LIM domain containing 2	Multiple_Complex
TC0800006860.hg.1	5.85	3.78	4.2	3.43e-16	1.78e-14	MICU3	mitochondrial calcium uptake family, member 3	Multiple_Complex
TC0X00008078.hg.1	7.74	6.32	2.68	1.19e-07	1.73e-06	MID2	midline 2	Multiple_Complex
TC1900006522.hg.1	9.25	10.76	-2.86	2.8e-13	9.76e-12	MIDN	midnolin	Multiple_Complex
TC1700006646.hg.1	8.83	10.29	-2.74	3.36e-09	6.34e-08	MINK1	misshapen-like kinase 1	Multiple_Complex
TC1700012249.hg.1	4.45	5.63	-2.27	1.13e-07	1.65e-06	MIR4728; ERBB2	microRNA 4728; erb-b2 receptor tyrosine kinase 2	Multiple_Complex
TC0900006569.hg.1	6.36	7.82	-2.75	7.73e-06	7.36e-05	MLANA	melan-A	Multiple_Complex
TC1600010859.hg.1	8.23	9.41	-2.27	1.48e-06	1.7e-05	MLKL	mixed lineage kinase domain-like	Multiple_Complex
TC0600010235.hg.1	4.9	6.12	-2.34	7.79e-06	7.41e-05	MLLT4	myeloid/lymphoid or mixed-lineage leukemia; translocated to, 4	Multiple_Complex
TSUnmapped00000262.hg.1	5.55	4.5	2.07	3.47e-08	5.51e-07	MLXIP	MLX interacting protein	Coding
TSUnmapped00000050.hg.1	7.47	6.32	2.23	5.78e-09	1.05e-07	MLXIP	MLX interacting protein	Coding
TSUnmapped00000103.hg.1	11.93	10.57	2.58	7.71e-15	3.4e-13	MLXIP	MLX interacting protein	NonCoding
TC1200009196.hg.1	8.09	6.71	2.6	9.85e-10	2.05e-08	MLXIP	MLX interacting protein	Multiple_Complex
TSUnmapped00000502.hg.1	10.76	9.33	2.7	1.72e-16	9.31e-15	MLXIP	MLX interacting protein	NonCoding
TC1600009165.hg.1	8.37	10.09	-3.3	1.16e-08	2e-07	MMP25-AS1	MMP25 antisense RNA 1	NonCoding
TC1700010440.hg.1	5.12	3.9	2.32	9.19e-10	1.92e-08	MMP28	matrix metallopeptidase 28	Multiple_Complex
TC2200007277.hg.1	4.2	5.89	-3.22	4.26e-14	1.67e-12	MPST	mercaptopyruvate sulfurtransferase	Multiple_Complex
TC1100012474.hg.1	5.81	4.69	2.17	1.31e-08	2.23e-07	MPZL2	myelin protein zero-like 2	Multiple_Complex
TC1700010960.hg.1	6.49	8.32	-3.57	2.62e-13	9.15e-12	MRPL10	mitochondrial ribosomal protein L10	Multiple_Complex
TC1100009983.hg.1	11.71	10.43	2.44	9.54e-10	1.99e-08	MRPL17	mitochondrial ribosomal protein L17	Multiple_Complex
TC0100016021.hg.1	9.84	8.77	2.11	3.86e-07	5.05e-06	MRPL24	mitochondrial ribosomal protein L24	Multiple_Complex
TC0300012445.hg.1	9.5	8.33	2.25	5.8e-10	1.26e-08	MRPL3	mitochondrial ribosomal protein L3	Multiple_Complex
TC0700007334.hg.1	10.87	9.74	2.19	1.63e-06	1.85e-05	MRPL32	mitochondrial ribosomal protein L32	Multiple_Complex
TC1700007700.hg.1	10.49	9.08	2.65	5.92e-15	2.69e-13	MRPL45	mitochondrial ribosomal protein L45	Multiple_Complex
TC1200009735.hg.1	13.18	12.14	2.05	3e-05	0.0002	MRPL51	mitochondrial ribosomal protein L51	Multiple_Complex
TC0700012824.hg.1	10.28	8.42	3.64	2.7e-17	1.59e-15	MRPS33	mitochondrial ribosomal protein S33	Multiple_Complex
TC0800010783.hg.1	5.04	7.66	-6.17	1.42e-19	1.19e-17	MSC	musculin	Multiple_Complex
TC0600007610.hg.1	5.21	6.47	-2.39	1.57e-07	2.24e-06	MSH5; MSH5-SAPCD1; SAPCD1	mutS homolog 5; MSH5-SAPCD1 readthrough (NMD candidate); suppressor APC domain containing 1	Multiple_Complex
TC0X00006614.hg.1	11.58	10.4	2.28	3.28e-11	8.51e-10	MSL3	male-specific lethal 3 homolog (Drosophila)	Multiple_Complex
TC0100010133.hg.1	10.47	11.73	-2.38	5.46e-05	0.0004	MSTO1; MSTO2P	misato 1, mitochondrial distribution and morphology regulator; misato family member 2, pseudogene	Multiple_Complex
TC1600007957.hg.1	11.95	10.73	2.33	0.0011	0.0055	MT2A	metallothionein 2A	Multiple_Complex
TC1600007955.hg.1	8.9	7.85	2.07	8.86e-08	1.32e-06	MT3	metallothionein 3	Multiple_Complex
TC0200016344.hg.1	10.01	8.74	2.4	4.15e-06	4.26e-05	MTERF4	mitochondrial transcription termination factor 4	Multiple_Complex
TC1500010900.hg.1	8.49	7.37	2.16	1.05e-07	1.53e-06	MTHFS	5,10-methenyltetrahydrofolate synthetase (5-formyltetrahydrofolate cyclo-ligase)	Multiple_Complex
TC0800011713.hg.1	6.2	10.44	-18.89	7.66e-18	4.86e-16	MTSS1	metastasis suppressor 1	Multiple_Complex
TC1600011560.hg.1	7.7	4.92	6.88	4.74e-19	3.54e-17	MTSS1L	metastasis suppressor 1-like	Multiple_Complex
TC0800009735.hg.1	8.16	5.04	8.67	2.51e-23	3.52e-21	MTUS1	microtubule associated tumor suppressor 1	Multiple_Complex
TC0900008776.hg.1	11.63	13.3	-3.19	6.38e-15	2.85e-13	MVB12B	multivesicular body subunit 12B	Multiple_Complex
TC0400009765.hg.1	7.75	9.65	-3.73	5.28e-16	2.69e-14	MXD4; MIR4800	MAX dimerization protein 4; microRNA 4800	Multiple_Complex
TC1700011815.hg.1	10.02	13.83	-14.09	1.72e-24	2.72e-22	MXRA7	matrix-remodelling associated 7	Multiple_Complex
TC0600009534.hg.1	10.94	5.78	35.6	1.31e-34	7.01e-32	MYB	v-myb avian myeloblastosis viral oncogene homolog	Multiple_Complex
TC0600013255.hg.1	5.82	4.52	2.46	2.48e-11	6.56e-10	MYB-AS1; MYB; RP1-32B1.3; rawjer	MYB antisense RNA 1 [Source:HGNC Symbol;Acc:HGNC:37457]; Memczak2013 ANTISENSE, coding, INTERNAL, intronic best transcript NM_005375; putative novel transcript; Transcript Identified by AceView	NonCoding
TC0800010685.hg.1	5.31	10.02	-26.2	1.08e-31	4.05e-29	MYBL1	v-myb avian myeloblastosis viral oncogene homolog-like 1	Multiple_Complex
TC0800008845.hg.1	10.52	6.59	15.22	1.95e-28	4.64e-26	MYC	v-myc avian myelocytomatosis viral oncogene homolog	Multiple_Complex
TC0400006472.hg.1	8.51	6.75	3.38	5.44e-14	2.1e-12	MYL5	myosin light chain 5	Multiple_Complex
TC0600007060.hg.1	11.33	12.37	-2.06	0.0002	0.001	MYLIP; MIR4639	myosin regulatory light chain interacting protein; microRNA 4639	Multiple_Complex
TC1700010358.hg.1	6.57	7.99	-2.66	4.06e-05	0.0003	MYO1D	myosin ID	Multiple_Complex
TC1900009548.hg.1	7.08	13.41	-80.22	2.21e-42	3.64e-39	MYO1F	myosin IF	Multiple_Complex
TC1900006904.hg.1	6.53	8.38	-3.61	1.31e-14	5.56e-13	MYO1F	Memczak2013 ANTISENSE, CDS, coding, INTERNAL best transcript NM_012335	NonCoding
TC0700010941.hg.1	8.75	11.33	-5.95	1.3e-18	9.24e-17	MYO1G	myosin IG	Multiple_Complex
TC0200009927.hg.1	3.39	5.61	-4.67	8.15e-10	1.72e-08	MYO3B	myosin IIIB	Multiple_Complex
TC1500009457.hg.1	5.86	7.69	-3.56	1.38e-09	2.79e-08	MYO5A	myosin VA	Multiple_Complex
TC0600008569.hg.1	5.9	8.3	-5.27	2.91e-20	2.73e-18	MYO6	myosin VI	Multiple_Complex
TC1900007305.hg.1	8.79	10.05	-2.4	2.92e-12	8.89e-11	MYO9B	myosin IXB	Multiple_Complex
TC1100007819.hg.1	3.8	4.89	-2.12	5.81e-06	5.72e-05	MYRF	myelin regulatory factor	Multiple_Complex
TC0500009648.hg.1	5.65	4.61	2.07	1.78e-08	2.96e-07	N4BP3	NEDD4 binding protein 3	Coding
TC1100007922.hg.1	6.72	7.93	-2.31	5.62e-07	7.06e-06	NAA40	N(alpha)-acetyltransferase 40, NatD catalytic subunit	Multiple_Complex
TC0300012029.hg.1	12.49	14.74	-4.75	6.18e-25	1.01e-22	NAA50	N(alpha)-acetyltransferase 50, NatE catalytic subunit	Multiple_Complex
TC1100011199.hg.1	7.71	6.52	2.27	2.23e-09	4.33e-08	NAALADL1	N-acetylated alpha-linked acidic dipeptidase-like 1	Multiple_Complex
TC0200010273.hg.1	6.74	7.96	-2.34	1.69e-05	0.0001	NAB1	NGFI-A binding protein 1	Multiple_Complex
TC0200016582.hg.1	10.06	11.33	-2.41	0.0003	0.0016	NABP1	nucleic acid binding protein 1	Multiple_Complex
TC1200011311.hg.1	15.79	14.61	2.28	0.0002	0.0012	NAP1L1	nucleosome assembly protein 1-like 1	Multiple_Complex
TC0X00010278.hg.1	6.64	5.47	2.26	5.05e-08	7.79e-07	NAP1L3	nucleosome assembly protein 1-like 3	Coding
TC2000008666.hg.1	9.08	10.32	-2.35	1.92e-06	2.15e-05	NAPB	N-ethylmaleimide-sensitive factor attachment protein, beta	Multiple_Complex
TC1700009256.hg.1	10.27	11.3	-2.05	6.39e-05	0.0005	NARF	nuclear prelamin A recognition factor	Multiple_Complex
TC1700011716.hg.1	6.27	7.33	-2.09	4.39e-06	4.47e-05	NAT9	N-acetyltransferase 9 (GCN5-related, putative)	Multiple_Complex
TC1300006861.hg.1	4.72	3.48	2.36	1.48e-08	2.49e-07	NBEA	neurobeachin	Multiple_Complex
TC0200010511.hg.1	5.23	6.3	-2.11	0.001	0.0052	NBEAL1	neurobeachin like 1	Multiple_Complex
TC0300007278.hg.1	5.52	9.42	-14.97	2.26e-19	1.82e-17	NBEAL2	neurobeachin like 2	Multiple_Complex
TC0800011305.hg.1	5.53	6.54	-2.01	1.61e-07	2.29e-06	NCALD	neurocalcin delta	Multiple_Complex
TC1100009068.hg.1	4.53	6.98	-5.45	1.25e-10	3.02e-09	NCAM1	neural cell adhesion molecule 1	Multiple_Complex
TC0200008502.hg.1	4.16	6.68	-5.74	1.1e-18	7.94e-17	NCAPH	non-SMC condensin I complex subunit H	Multiple_Complex
TC1700009490.hg.1	7.17	9.09	-3.78	2.34e-09	4.52e-08	NCBP3	nuclear cap binding subunit 3	Multiple_Complex
TC0200008742.hg.1	11.17	9.86	2.48	1.02e-10	2.48e-09	NCK2	NCK adaptor protein 2	Multiple_Complex
TC0200016757.hg.1	4.28	5.53	-2.38	2.39e-07	3.27e-06	NCKAP1	NCK-associated protein 1	Multiple_Complex
TC1200007767.hg.1	9.04	10.3	-2.39	3.8e-08	6.01e-07	NCKAP1L	NCK-associated protein 1-like	Multiple_Complex
TC0800010749.hg.1	8.62	10.57	-3.86	4.95e-14	1.92e-12	NCOA2	nuclear receptor coactivator 2	Multiple_Complex
TC2000010002.hg.1	9.39	10.7	-2.48	3e-07	4.01e-06	NCOA6	nuclear receptor coactivator 6	Multiple_Complex
TC1900008882.hg.1	5.31	9.26	-15.44	3.22e-25	5.47e-23	NCR1	natural cytotoxicity triggering receptor 1	Multiple_Complex
TC0600011439.hg.1	5.67	7.05	-2.6	8.28e-06	7.82e-05	NCR3	natural cytotoxicity triggering receptor 3	Multiple_Complex
TC0900008949.hg.1	5.12	6.35	-2.35	8.43e-05	0.0006	NCS1	neuronal calcium sensor 1	Multiple_Complex
TC0500008921.hg.1	10.69	9.62	2.1	5.04e-15	2.31e-13	NDFIP1	Nedd4 family interacting protein 1	Multiple_Complex
TC0800011881.hg.1	9.76	11.06	-2.46	4.24e-11	1.09e-09	NDRG1	N-myc downstream regulated 1	Multiple_Complex
TC0600012628.hg.1	10.18	9.13	2.06	4.8e-07	6.15e-06	NDUFAF4	NADH dehydrogenase (ubiquinone) complex I, assembly factor 4	Multiple_Complex
TC0800012330.hg.1	6.34	7.37	-2.05	0.0008	0.004	NDUFAF6	NADH dehydrogenase (ubiquinone) complex I, assembly factor 6	NonCoding
TC0300008514.hg.1	9.59	8.56	2.03	4e-05	0.0003	NDUFB4	NADH dehydrogenase (ubiquinone) 1 beta subcomplex, 4, 15kDa	Multiple_Complex
TC0300009610.hg.1	12.23	11.19	2.06	3.27e-06	3.44e-05	NDUFB5	NADH dehydrogenase (ubiquinone) 1 beta subcomplex, 5, 16kDa	Multiple_Complex
TC1800009214.hg.1	13.24	11.73	2.85	5.86e-18	3.76e-16	NDUFV2	NADH dehydrogenase (ubiquinone) flavoprotein 2, 24kDa	Multiple_Complex
TC1800007411.hg.1	6.54	5.52	2.02	0.0023	0.01	NEDD4L	neural precursor cell expressed, developmentally down-regulated 4-like, E3 ubiquitin protein ligase	Multiple_Complex
TC0600010810.hg.1	6.56	8.28	-3.3	2.27e-12	6.99e-11	NEDD9	neural precursor cell expressed, developmentally down-regulated 9	Multiple_Complex
TC0600010817.hg.1	5.18	6.24	-2.08	8.3e-05	0.0006	NEDD9	Memczak2013 ALT_ACCEPTOR, ALT_DONOR, coding, INTERNAL, intronic best transcript NM_001142393	NonCoding
TC0900008716.hg.1	5.4	6.74	-2.53	4.04e-13	1.38e-11	NEK6	NIMA-related kinase 6	Multiple_Complex
TC1200010490.hg.1	13.39	8.68	26.13	2.21e-24	3.43e-22	NELL2	neural EGFL like 2	Multiple_Complex
TC1500007814.hg.1	5.54	6.67	-2.19	2.09e-05	0.0002	NEO1	neogenin 1	Multiple_Complex
TC1600010181.hg.1	5.3	6.97	-3.17	4.47e-09	8.31e-08	NETO2	neuropilin (NRP) and tolloid (TLL)-like 2	Multiple_Complex
TC1800007805.hg.1	7.38	6.33	2.08	4.38e-07	5.65e-06	NFATC1	nuclear factor of activated T-cells, cytoplasmic, calcineurin-dependent 1	Multiple_Complex
TC2000009458.hg.1	10.66	13.99	-10.11	1.52e-31	5.51e-29	NFATC2	nuclear factor of activated T-cells, cytoplasmic, calcineurin-dependent 2	Multiple_Complex
TC0900010769.hg.1	8.16	9.9	-3.32	6.55e-11	1.63e-09	NFIL3	nuclear factor, interleukin 3 regulated	Coding
TC1900007115.hg.1	9.14	6.33	7.04	4.18e-21	4.44e-19	NFIX	nuclear factor I/X (CCAAT-binding transcription factor)	Multiple_Complex
TC0X00008002.hg.1	12.54	6.82	52.93	1.17e-35	6.6e-33	NGFRAP1	nerve growth factor receptor (TNFRSF16) associated protein 1	Multiple_Complex
TC0200016772.hg.1	9.84	8.67	2.26	3.66e-06	3.81e-05	NHEJ1	nonhomologous end-joining factor 1	Multiple_Complex
TC1000008961.hg.1	11.11	12.72	-3.05	2.16e-13	7.62e-12	NHLRC2	NHL repeat containing 2	Multiple_Complex
TC0X00011305.hg.1	3.33	6.9	-11.89	1.72e-18	1.21e-16	NHSL2	NHS-like 2	Multiple_Complex
TC0200014108.hg.1	11.29	10.06	2.34	1.7e-07	2.39e-06	NIFK	nucleolar protein interacting with the FHA domain of MKI67	Multiple_Complex
TC1500010691.hg.1	9.45	10.49	-2.06	5.46e-07	6.89e-06	NIPA1	non imprinted in Prader-Willi/Angelman syndrome 1	Multiple_Complex
TC0800011211.hg.1	3.76	4.85	-2.13	1.72e-05	0.0001	NIPAL2	NIPA-like domain containing 2	Multiple_Complex
TC0300007483.hg.1	8.44	9.67	-2.35	1.11e-05	0.0001	NISCH	Zhang2013 ALT_DONOR, coding, INTERNAL, intronic best transcript NM_007184	NonCoding
TC0300007482.hg.1	7.07	8.18	-2.16	3.8e-08	6.01e-07	NISCH	nischarin	Multiple_Complex
TC1900011251.hg.1	10.23	18.4	-288.22	1.4e-45	1.4e-45	NKG7	natural killer cell granule protein 7	Coding
TC1600009198.hg.1	8.25	9.84	-2.99	1.02e-07	1.5e-06	NLRC3	NLR family, CARD domain containing 3	Multiple_Complex
TC1600007986.hg.1	10.71	12.06	-2.54	0.0006	0.003	NLRC5	NLR family, CARD domain containing 5	Multiple_Complex
TC1700008282.hg.1	13.27	11.6	3.17	2.53e-12	7.75e-11	NME1; NME1-NME2; NME2	NME/NM23 nucleoside diphosphate kinase 1; NME1-NME2 readthrough; NME/NM23 nucleoside diphosphate kinase 2	Multiple_Complex
TC0700013355.hg.1	3.65	5.23	-2.98	5.02e-10	1.11e-08	NME8	NME/NM23 family member 8	Multiple_Complex
TC0200016026.hg.1	4.37	5.89	-2.87	1.12e-10	2.72e-09	NMUR1	neuromedin U receptor 1	Coding
TC0400010784.hg.1	9.73	8.53	2.29	1.32e-09	2.69e-08	NOA1	nitric oxide associated 1	Multiple_Complex
TC1600010734.hg.1	11.44	10.39	2.07	1.31e-10	3.16e-09	NOB1	NIN1/RPN12 binding protein 1 homolog	Multiple_Complex
TC1600007827.hg.1	5.36	6.64	-2.44	1.42e-09	2.86e-08	NOD2	nucleotide-binding oligomerization domain containing 2	Multiple_Complex
TC1700008350.hg.1	8.02	4.49	11.51	1.85e-32	8.1e-30	NOG	noggin	Coding
TC0500012937.hg.1	9.55	8.49	2.09	8.82e-05	0.0006	NOP16	NOP16 nucleolar protein	Multiple_Complex
TC0200008627.hg.1	6.9	4.34	5.89	5.28e-21	5.47e-19	NPAS2	neuronal PAS domain protein 2	Multiple_Complex
TC1100012225.hg.1	11.93	10.89	2.06	0.0001	0.0009	NPAT	nuclear protein, ataxia-telangiectasia locus	Multiple_Complex
TC1800008285.hg.1	8.21	11.98	-13.68	1.88e-27	3.74e-25	NPC1	Niemann-Pick disease, type C1	Multiple_Complex
TC1400009697.hg.1	8.53	7.34	2.28	1.2e-08	2.08e-07	NPC2; MIR4709	Niemann-Pick disease, type C2; microRNA 4709	Multiple_Complex
TC2000009948.hg.1	6.37	7.55	-2.26	1.03e-05	9.54e-05	NPEPL1	aminopeptidase-like 1	Multiple_Complex
TC1600011355.hg.1	10.83	12.17	-2.53	4.16e-05	0.0003	NPIPA1	nuclear pore complex interacting protein family, member A1	Multiple_Complex
TC1600011354.hg.1	11.34	12.75	-2.65	1.51e-06	1.73e-05	NPIPA2	nuclear pore complex interacting protein family, member A2	Coding
TC1600011353.hg.1	11.34	12.79	-2.74	1.32e-06	1.53e-05	NPIPA3	nuclear pore complex interacting protein family, member A3	Multiple_Complex
TC1600009524.hg.1	11.66	13.27	-3.05	2.92e-06	3.11e-05	NPIPA5	nuclear pore complex interacting protein family, member A5	Coding
TC1600007037.hg.1	14.13	15.42	-2.45	2.39e-06	2.61e-05	NPIPA7	nuclear pore complex interacting protein family, member A7	Coding
TC1600007030.hg.1	10.81	12.04	-2.34	1.15e-05	0.0001	NPIPA7; NPIPA8; PKD1P1	nuclear pore complex interacting protein family, member A7; nuclear pore complex interacting protein family, member A8; polycystic kidney disease 1 (autosomal dominant) pseudogene 1	Multiple_Complex
TC1600011487.hg.1	12.31	13.61	-2.47	4.32e-06	4.41e-05	NPIPA8	nuclear pore complex interacting protein family, member A8	Coding
TC1600009916.hg.1	13.98	15.5	-2.86	6.26e-06	6.1e-05	NPIPB11	nuclear pore complex interacting protein family, member B11	Coding
TC1600008407.hg.1	11.36	12.55	-2.28	6.97e-05	0.0005	NPIPB15	nuclear pore complex interacting protein family, member B15	Multiple_Complex
TC1600011501.hg.1	13.3	14.76	-2.76	4.01e-06	4.12e-05	NPIPB3	nuclear pore complex interacting protein family, member B3	Multiple_Complex
TC1600011505.hg.1	13.39	15.17	-3.42	5.72e-06	5.64e-05	NPIPB4	nuclear pore complex interacting protein family, member B4	Multiple_Complex
TC1600009958.hg.1	13.19	14.79	-3.02	3.78e-06	3.92e-05	NPIPB4	nuclear pore complex interacting protein family, member B4	Multiple_Complex
TC1600011364.hg.1	13.22	14.58	-2.56	1.05e-05	9.68e-05	NPIPB5	nuclear pore complex interacting protein family, member B5	Multiple_Complex
TC1600009855.hg.1	12.84	13.93	-2.13	6.47e-05	0.0005	NPIPB6	nuclear pore complex interacting protein family, member B6	Coding
TC1600007353.hg.1	14.16	15.42	-2.4	6.86e-06	6.62e-05	NPIPB8	nuclear pore complex interacting protein family, member B8	Coding
TC1600011365.hg.1	11.56	12.64	-2.12	0.0001	0.0007	NPIPB9	nuclear pore complex interacting protein family, member B9	Coding
TC1000011658.hg.1	9.42	7.29	4.38	6.04e-19	4.47e-17	NPM3	nucleophosmin/nucleoplasmin 3	Multiple_Complex
TC0500012340.hg.1	11.06	12.62	-2.94	1.47e-17	8.91e-16	NR3C1	nuclear receptor subfamily 3, group C, member 1 (glucocorticoid receptor)	Multiple_Complex
TC0700012230.hg.1	9.46	6.93	5.77	3.34e-24	5.12e-22	NRCAM	neuronal cell adhesion molecule	Multiple_Complex
TC0500011705.hg.1	8.69	6.01	6.43	4.49e-21	4.72e-19	NREP	neuronal regeneration related protein	Multiple_Complex
TC2100008545.hg.1	7.61	6.15	2.75	2.43e-08	3.95e-07	NRIP1	nuclear receptor interacting protein 1	Multiple_Complex
TC0600011377.hg.1	7.99	9.5	-2.86	7.83e-12	2.25e-10	NRM	nurim (nuclear envelope membrane protein)	Multiple_Complex
TC0600010707.hg.1	5.87	4.81	2.09	5.88e-05	0.0004	NRN1	neuritin 1	Multiple_Complex
TC1600009829.hg.1	7.42	6.03	2.61	8.71e-12	2.49e-10	NSMCE1	NSE1 homolog, SMC5-SMC6 complex component	Multiple_Complex
TC0300011173.hg.1	6.98	8.55	-2.97	2.18e-06	2.41e-05	NT5DC2	5-nucleotidase domain containing 2	Multiple_Complex
TC0600008697.hg.1	7.93	5.67	4.81	7.64e-15	3.38e-13	NT5E	5-nucleotidase, ecto (CD73)	Multiple_Complex
TC0900009018.hg.1	6.2	7.46	-2.39	1.6e-12	5.06e-11	NTNG2	netrin G2	Multiple_Complex
TC0100017064.hg.1	6.26	5.22	2.06	5.15e-07	6.53e-06	NUAK2	NUAK family, SNF1-like kinase, 2	Multiple_Complex
TC1100012976.hg.1	13.22	11.17	4.12	7.34e-07	8.99e-06	NUCB2	nucleobindin 2	Multiple_Complex
TC0800011472.hg.1	9.29	8.21	2.12	0.0001	0.0007	NUDCD1	NudC domain containing 1	Multiple_Complex
TC1500006999.hg.1	4.53	5.7	-2.25	1.62e-07	2.29e-06	NUSAP1	nucleolar and spindle associated protein 1	Multiple_Complex
TC1100011101.hg.1	9.79	10.95	-2.24	3.34e-06	3.5e-05	NXF1	nuclear RNA export factor 1	Multiple_Complex
TC2000006956.hg.1	9.53	8.32	2.31	8.98e-13	2.9e-11	NXT1	nuclear transport factor 2-like export factor 1	Multiple_Complex
TC1200012190.hg.1	7.75	12.06	-19.71	9.74e-29	2.46e-26	OASL	2-5-oligoadenylate synthetase-like	Multiple_Complex
TC1000011736.hg.1	10.99	9.49	2.83	6.24e-13	2.06e-11	OBFC1	oligonucleotide/oligosaccharide-binding fold containing 1	Multiple_Complex
TC0400010636.hg.1	13.47	11.71	3.39	8.96e-16	4.46e-14	OCIAD2	OCIA domain containing 2	Multiple_Complex
TC0100010926.hg.1	6.45	7.47	-2.02	3.73e-05	0.0003	OCLM	Transcript Identified by AceView, Entrez Gene ID(s) 10896	Unassigned
TC0700006632.hg.1	6.29	4.88	2.67	9.5e-09	1.67e-07	OCM	oncomodulin	Coding
TC0700011886.hg.1	7.76	6.42	2.54	1.27e-11	3.53e-10	OCM2	oncomodulin 2	Multiple_Complex
TC0900008869.hg.1	8.43	9.47	-2.05	5.81e-05	0.0004	ODF2	outer dense fiber of sperm tails 2	Multiple_Complex
TC0100014794.hg.1	11.11	12.78	-3.18	2.09e-10	4.88e-09	ODF2L	outer dense fiber of sperm tails 2-like	Multiple_Complex
TC0X00006658.hg.1	13.19	14.36	-2.24	0.0001	0.001	OFD1	oral-facial-digital syndrome 1	Multiple_Complex
TC0600008486.hg.1	6.24	8.2	-3.89	2.51e-09	4.83e-08	OGFRL1	opioid growth factor receptor-like 1	Multiple_Complex
TC0X00007573.hg.1	11.62	12.86	-2.36	0.0002	0.0013	OGT	O-linked N-acetylglucosamine (GlcNAc) transferase	Multiple_Complex
TC1900009603.hg.1	6.74	5.49	2.37	2.4e-08	3.91e-07	OLFM2	olfactomedin 2	Multiple_Complex
TC0100017947.hg.1	7.12	5.53	3.01	1.42e-08	2.39e-07	OPN3	opsin 3	Multiple_Complex
TC1000006816.hg.1	10.12	11.98	-3.63	5.1e-16	2.61e-14	OPTN	optineurin	Multiple_Complex
TC0900012163.hg.1	4.55	6.16	-3.04	1.94e-09	3.83e-08	ORM2	orosomucoid 2	Multiple_Complex
TC1200007895.hg.1	10.04	11.27	-2.35	2.76e-10	6.35e-09	OS9	osteosarcoma amplified 9, endoplasmic reticulum lectin	Multiple_Complex
TC2200007069.hg.1	7.27	6.12	2.22	5.36e-06	5.32e-05	OSBP2	oxysterol binding protein 2	Multiple_Complex
TC0700010504.hg.1	5.54	7.71	-4.51	5.54e-11	1.4e-09	OSBPL3	oxysterol binding protein-like 3	Multiple_Complex
TC1700010959.hg.1	5.2	7.98	-6.87	5.63e-20	5.1e-18	OSBPL7	oxysterol binding protein-like 7	Multiple_Complex
TC0900007604.hg.1	9.77	11.53	-3.39	1.27e-18	9.11e-17	OSTF1	osteoclast stimulating factor 1	Multiple_Complex
TC0500006822.hg.1	10.94	12.36	-2.67	3.04e-06	3.22e-05	OTULIN	OTU deubiquitinase with linear linkage specificity	Multiple_Complex
TC0300013796.hg.1	8.12	6.96	2.24	7.24e-06	6.95e-05	OXNAD1	oxidoreductase NAD-binding domain containing 1	NonCoding
TC0300013795.hg.1	7.4	6.1	2.45	3.34e-11	8.65e-10	OXNAD1	oxidoreductase NAD-binding domain containing 1	Multiple_Complex
TC1700012337.hg.1	5.75	6.97	-2.33	0.0001	0.0008	P2RX5	purinergic receptor P2X, ligand gated ion channel, 5	Multiple_Complex
TC1200009157.hg.1	5.82	7	-2.27	0.0003	0.0017	P2RX7	purinergic receptor P2X, ligand gated ion channel, 7	Multiple_Complex
TC1700012073.hg.1	9.78	10.79	-2.02	8.69e-09	1.54e-07	P4HB	prolyl 4-hydroxylase, beta polypeptide	Multiple_Complex
TC0300013826.hg.1	5.53	6.61	-2.12	1.1e-06	1.3e-05	P4HTM	prolyl 4-hydroxylase, transmembrane (endoplasmic reticulum)	Multiple_Complex
TC0800012444.hg.1	12.82	10.17	6.26	1.22e-17	7.51e-16	PABPC1; MIR7705	poly(A) binding protein, cytoplasmic 1; microRNA 7705	Multiple_Complex
TC1300006633.hg.1	11.03	9.82	2.32	5.12e-16	2.62e-14	PABPC3	poly(A) binding protein, cytoplasmic 3	Coding
TC0100013796.hg.1	11.25	9.55	3.24	2.46e-16	1.29e-14	PABPC4	poly(A) binding protein, cytoplasmic 4 (inducible form)	Multiple_Complex
TC0800010926.hg.1	12.12	10.99	2.2	5e-05	0.0004	PAG1	phosphoprotein membrane anchor with glycosphingolipid microdomains 1	Multiple_Complex
TC0400007592.hg.1	9.62	7.55	4.2	1.13e-13	4.16e-12	PAICS	phosphoribosylaminoimidazole carboxylase, phosphoribosylaminoimidazole succinocarboxamide synthetase	Multiple_Complex
TC0400009258.hg.1	5.38	7.64	-4.81	3.44e-12	1.03e-10	PALLD	palladin, cytoskeletal associated protein	Multiple_Complex
TC1000011382.hg.1	3.99	5.34	-2.55	2.11e-08	3.46e-07	PANK1	pantothenate kinase 1	Multiple_Complex
TC0300008559.hg.1	9.72	12.75	-8.19	3.46e-15	1.62e-13	PARP15	poly(ADP-ribose) polymerase family member 15	Multiple_Complex
TC1300008359.hg.1	8.33	9.42	-2.13	9.27e-06	8.67e-05	PARP4	poly(ADP-ribose) polymerase family member 4	Multiple_Complex
TC0500007337.hg.1	12.54	13.55	-2.01	8.77e-14	3.28e-12	PARP8	poly(ADP-ribose) polymerase family member 8	Multiple_Complex
TC1500009263.hg.1	8.29	12.06	-13.65	6.72e-18	4.3e-16	PATL2	protein associated with topoisomerase II homolog 2 (yeast)	Multiple_Complex
TC2200008477.hg.1	11.31	10	2.47	7.86e-11	1.94e-09	PATZ1	POZ (BTB) and AT hook containing zinc finger 1	Multiple_Complex
TC1900010067.hg.1	7.99	9.13	-2.2	3.11e-06	3.29e-05	PBX4	pre-B-cell leukemia homeobox 4	Multiple_Complex
TC0300013988.hg.1	6.84	8.95	-4.34	5.68e-12	1.66e-10	PCBP4	poly(rC) binding protein 4	Multiple_Complex
TC2100007465.hg.1	4.48	5.82	-2.53	0.0002	0.0015	PCNT	pericentrin	Multiple_Complex
TC0900007618.hg.1	7.12	4.53	6.01	2.43e-20	2.31e-18	PCSK5	proprotein convertase subtilisin/kexin type 5	Multiple_Complex
TC1100012444.hg.1	9.98	11.03	-2.08	0.0002	0.0013	PCSK7	proprotein convertase subtilisin/kexin type 7	Multiple_Complex
TC1700008342.hg.1	6.68	8.4	-3.3	5.72e-08	8.78e-07	PCTP	phosphatidylcholine transfer protein	Multiple_Complex
TC0500009061.hg.1	10.16	8.61	2.93	1.57e-11	4.31e-10	PCYOX1L	prenylcysteine oxidase 1 like	Multiple_Complex
TC0300014093.hg.1	9.78	11.68	-3.74	3.86e-11	9.95e-10	PCYT1A	phosphate cytidylyltransferase 1, choline, alpha	Multiple_Complex
TSUnmapped00000819.hg.1	9.41	11.12	-3.27	1.32e-12	4.19e-11	PCYT1A	phosphate cytidylyltransferase 1, choline, alpha	Coding
TC1900011708.hg.1	12.07	9.7	5.15	8.95e-21	9.1e-19	PDCD2L	programmed cell death 2-like	Multiple_Complex
TC1200007769.hg.1	5.89	7.11	-2.33	6.3e-08	9.53e-07	PDE1B	phosphodiesterase 1B, calmodulin-dependent	Multiple_Complex
TC1100006923.hg.1	12.32	9.94	5.2	5.44e-16	2.76e-14	PDE3B	phosphodiesterase 3B, cGMP-inhibited	Multiple_Complex
TC1100006925.hg.1	8.73	6.32	5.3	4.45e-07	5.74e-06	PDE3B	phosphodiesterase 3B, cGMP-inhibited	NonCoding
TC1900006985.hg.1	5.19	6.4	-2.31	2.54e-07	3.45e-06	PDE4A	phosphodiesterase 4A, cAMP-specific	Multiple_Complex
TC0100008625.hg.1	9.45	11.18	-3.33	1.97e-08	3.24e-07	PDE4B	phosphodiesterase 4B, cAMP-specific	Multiple_Complex
TC2100007263.hg.1	8.01	4.28	13.21	1.27e-19	1.08e-17	PDE9A	phosphodiesterase 9A	Multiple_Complex
TC1500007072.hg.1	8.61	9.63	-2.03	0.0004	0.0023	PDIA3	protein disulfide isomerase family A member 3	Multiple_Complex
TC0200011731.hg.1	9.87	11.56	-3.23	1.63e-12	5.12e-11	PDIA6	protein disulfide isomerase family A, member 6	Multiple_Complex
TC0200009978.hg.1	10.47	9.43	2.05	0.0003	0.0016	PDK1	pyruvate dehydrogenase kinase, isozyme 1	Multiple_Complex
TC1000011485.hg.1	5.33	6.76	-2.69	9.05e-12	2.58e-10	PDLIM1	PDZ and LIM domain 1	Multiple_Complex
TC0800012280.hg.1	7.83	9.08	-2.37	8.99e-11	2.21e-09	PDLIM2	PDZ and LIM domain 2 (mystique)	Multiple_Complex
TC0X00011174.hg.1	3.33	6.43	-8.58	1.28e-16	7.04e-15	PDZD4	PDZ domain containing 4	Multiple_Complex
TC1000011948.hg.1	8.2	9.44	-2.36	1.41e-07	2.03e-06	PDZD8	PDZ domain containing 8	Multiple_Complex
TC1700011442.hg.1	10.82	8.52	4.93	8.34e-12	2.39e-10	PECAM1	platelet/endothelial cell adhesion molecule 1	Multiple_Complex
TC0200012809.hg.1	7.53	6.43	2.14	5.41e-07	6.83e-06	PELI1	pellino E3 ubiquitin protein ligase 1	Multiple_Complex
TC0600013326.hg.1	6.18	8.35	-4.47	1.57e-17	9.53e-16	PERP	PERP, TP53 apoptosis effector	Coding
TC0200015332.hg.1	8.68	7.31	2.59	4.43e-06	4.5e-05	PGAP1	post-GPI attachment to proteins 1	Multiple_Complex
TC0600014188.hg.1	7.65	9.33	-3.22	1.06e-08	1.85e-07	PHACTR2	phosphatase and actin regulator 2	Multiple_Complex
TC1100010688.hg.1	11.78	13.51	-3.33	2.25e-13	7.95e-12	PHF21A	PHD finger protein 21A	Multiple_Complex
TC0100009621.hg.1	6.45	4.79	3.16	6.39e-20	5.69e-18	PHGDH	phosphoglycerate dehydrogenase	Multiple_Complex
TC0300008324.hg.1	5.25	7.03	-3.44	2.03e-09	3.98e-08	PHLDB2; PLCXD2	pleckstrin homology-like domain, family B, member 2; phosphatidylinositol-specific phospholipase C, X domain containing 2	Multiple_Complex
TC1700011033.hg.1	5.47	6.71	-2.37	3.74e-10	8.42e-09	PHOSPHO1	phosphatase, orphan 1	Coding
TC0100015330.hg.1	4.76	5.79	-2.04	1.17e-05	0.0001	PHTF1	putative homeodomain transcription factor 1	Multiple_Complex
TC0100015591.hg.1	8.59	9.75	-2.24	4.45e-08	6.94e-07	PIAS3	protein inhibitor of activated STAT 3	Multiple_Complex
TC1100011838.hg.1	10.88	13.17	-4.9	1.6e-31	5.72e-29	PICALM	phosphatidylinositol binding clathrin assembly protein	Multiple_Complex
TC1600011228.hg.1	7.12	9.64	-5.72	4.33e-18	2.85e-16	PIEZO1	piezo-type mechanosensitive ion channel component 1	Multiple_Complex
TC1000011524.hg.1	7.58	10.45	-7.35	5.31e-26	9.66e-24	PIK3AP1	phosphoinositide-3-kinase adaptor protein 1	Multiple_Complex
TC0700008743.hg.1	8.54	10.74	-4.59	1.54e-19	1.28e-17	PIK3CG	phosphatidylinositol-4,5-bisphosphate 3-kinase, catalytic subunit gamma	Multiple_Complex
TC0700012197.hg.1	4.42	5.85	-2.69	8.04e-10	1.7e-08	PIK3CG	Memczak2013 ANTISENSE, CDS, coding, INTERNAL best transcript NM_002649	NonCoding
TC2200008475.hg.1	15	13.38	3.07	6.24e-12	1.82e-10	PIK3IP1	phosphoinositide-3-kinase interacting protein 1	Multiple_Complex
TC0500007641.hg.1	10.41	13.54	-8.73	2.75e-20	2.6e-18	PIK3R1	phosphoinositide-3-kinase, regulatory subunit 1 (alpha)	Multiple_Complex
TC0100014040.hg.1	4.06	5.29	-2.35	1.38e-09	2.79e-08	PIK3R3	phosphoinositide-3-kinase, regulatory subunit 3 (gamma)	Multiple_Complex
TC1700009708.hg.1	9.11	10.48	-2.57	3.03e-08	4.85e-07	PIK3R5	phosphoinositide-3-kinase, regulatory subunit 5	Multiple_Complex
TC1700009707.hg.1	4.29	5.93	-3.12	2.08e-10	4.85e-09	PIK3R6	phosphoinositide-3-kinase, regulatory subunit 6	Multiple_Complex
TC0X00009637.hg.1	15.24	13.88	2.57	3.59e-11	9.26e-10	PIM2	Pim-2 proto-oncogene, serine/threonine kinase	Multiple_Complex
TC1000010022.hg.1	14.44	15.52	-2.11	6.19e-13	2.04e-11	PIP4K2A	phosphatidylinositol-5-phosphate 4-kinase, type II, alpha	Multiple_Complex
TC0400008093.hg.1	5.24	6.26	-2.03	1.8e-06	2.02e-05	PKD2	polycystic kidney disease 2 (autosomal dominant)	Multiple_Complex
TC0800008028.hg.1	9.54	6.48	8.32	3.74e-17	2.17e-15	PKIA	protein kinase (cAMP-dependent, catalytic) inhibitor alpha	Multiple_Complex
TC2000007457.hg.1	6.54	5.15	2.62	3.03e-10	6.92e-09	PKIG	protein kinase (cAMP-dependent, catalytic) inhibitor gamma	Multiple_Complex
TC1100011126.hg.1	5.38	8.23	-7.2	1.19e-21	1.35e-19	PLA2G16	phospholipase A2, group XVI	Multiple_Complex
TC2200008682.hg.1	7.8	8.92	-2.17	1.78e-06	2.01e-05	PLA2G6	phospholipase A2, group VI (cytosolic, calcium-independent)	Multiple_Complex
TC0800010506.hg.1	9.6	5.64	15.54	1.86e-20	1.8e-18	PLAG1	pleiomorphic adenoma gene 1	Multiple_Complex
TC2000009887.hg.1	5.05	7.02	-3.92	2.14e-09	4.16e-08	PLCB1	phospholipase C, beta 1 (phosphoinositide-specific)	Multiple_Complex
TC1500009089.hg.1	6.32	7.95	-3.09	2.43e-07	3.32e-06	PLCB2	phospholipase C, beta 2	Multiple_Complex
TC0300010739.hg.1	5.93	6.98	-2.08	4.76e-08	7.39e-07	PLCD1	phospholipase C, delta 1	Multiple_Complex
TC1600008607.hg.1	4.33	8.27	-15.39	8.3e-21	8.52e-19	PLCG2	phospholipase C, gamma 2 (phosphatidylinositol-specific)	Multiple_Complex
TC0200007895.hg.1	5.32	11.48	-71.26	4.86e-41	6.95e-38	PLEK	pleckstrin	Multiple_Complex
TC0800007362.hg.1	9.88	11.3	-2.68	5.25e-12	1.54e-10	PLEKHA2	pleckstrin homology domain containing, family A (phosphoinositide binding specific) member 2	Multiple_Complex
TC1200007010.hg.1	4.28	7.87	-12.06	2.98e-23	4.1e-21	PLEKHA5	pleckstrin homology domain containing, family A member 5	Multiple_Complex
TC1100008392.hg.1	10.77	9.19	2.98	2.31e-14	9.5e-13	PLEKHB1	pleckstrin homology domain containing, family B (evectins) member 1	Multiple_Complex
TC1900007679.hg.1	9.18	10.41	-2.35	3.42e-06	3.58e-05	PLEKHF1	pleckstrin homology domain containing, family F (with FYVE domain) member 1	Coding
TC0600009843.hg.1	4.27	5.78	-2.84	7.26e-11	1.8e-09	PLEKHG1	pleckstrin homology domain containing, family G (with RhoGef domain) member 1	Multiple_Complex
TC1400007445.hg.1	4.13	6.01	-3.66	6.38e-15	2.85e-13	PLEKHG3	pleckstrin homology domain containing, family G (with RhoGef domain) member 3	Multiple_Complex
TC1500010754.hg.1	5.42	6.53	-2.16	2.26e-07	3.11e-06	PLEKHO2	pleckstrin homology domain containing, family O member 2	Multiple_Complex
TC0900012212.hg.1	9.69	10.7	-2.02	0.0002	0.0013	PLIN2	perilipin 2	Multiple_Complex
TC1600011546.hg.1	4.98	3.84	2.21	1.68e-12	5.27e-11	PLLP	plasmolipin	Multiple_Complex
TC0500010766.hg.1	8.25	7.23	2.02	6.23e-08	9.44e-07	PLPP1; RNF138P1	phospholipid phosphatase 1; ring finger protein 138, E3 ubiquitin protein ligase pseudogene 1	Multiple_Complex
TC1700010560.hg.1	6.27	5.04	2.34	1.13e-05	0.0001	PLXDC1	plexin domain containing 1	Multiple_Complex
TC0X00008836.hg.1	6.2	8	-3.47	5.54e-13	1.84e-11	PLXNA3	plexin A3	Multiple_Complex
TC2200009152.hg.1	7.33	4.89	5.42	1.96e-19	1.59e-17	PLXNB2	plexin B2	Multiple_Complex
TC1200008488.hg.1	6.05	7.07	-2.02	1.08e-05	9.94e-05	PLXNC1	plexin C1	Multiple_Complex
TC0300012397.hg.1	4.74	9.33	-24.09	2.76e-24	4.26e-22	PLXND1	plexin D1	Multiple_Complex
TC2000009604.hg.1	9.72	8.67	2.07	0.0072	0.0253	PMEPA1	prostate transmembrane protein, androgen induced 1	Multiple_Complex
TC0X00009018.hg.1	8.04	5.64	5.28	7.89e-18	4.99e-16	PNPLA4	patatin-like phospholipase domain containing 4	Coding
TC1900011787.hg.1	7.08	5.94	2.2	4.11e-05	0.0003	POLD1	polymerase (DNA directed), delta 1, catalytic subunit	Multiple_Complex
TC0700010910.hg.1	8.54	7.53	2.02	6.45e-06	6.27e-05	POLD2	polymerase (DNA directed), delta 2, accessory subunit	Multiple_Complex
TC0600008095.hg.1	9.42	8.42	2	1.38e-09	2.79e-08	POLR1C	polymerase (RNA) I polypeptide C	Multiple_Complex
TC1400009777.hg.1	5.68	6.89	-2.32	1.15e-06	1.36e-05	POMT2	protein-O-mannosyltransferase 2	Multiple_Complex
TC1000010914.hg.1	9.52	7.78	3.34	5.03e-13	1.69e-11	PPA1	pyrophosphatase (inorganic) 1	Multiple_Complex
TC0500009072.hg.1	6.63	5.04	3.01	1.72e-15	8.29e-14	PPARGC1B	peroxisome proliferator-activated receptor gamma, coactivator 1 beta	Multiple_Complex
TC1100006760.hg.1	6.37	4.13	4.74	2.4e-16	1.26e-14	PPFIBP2	PTPRF interacting protein, binding protein 2 (liprin beta 2)	Multiple_Complex
TC1500009223.hg.1	5.35	6.37	-2.02	0.0002	0.0012	PPIP5K1	diphosphoinositol pentakisphosphate kinase 1	Multiple_Complex
TC0300009353.hg.1	3.79	4.84	-2.08	1.07e-05	9.86e-05	PPM1L	protein phosphatase, Mg2+/Mn2+ dependent, 1L	Multiple_Complex
TC0100010336.hg.1	7.18	8.2	-2.04	2.2e-08	3.6e-07	PPOX	protoporphyrinogen oxidase	Multiple_Complex
TC1900008496.hg.1	11.45	10.05	2.63	7.97e-09	1.42e-07	PPP1R15A	protein phosphatase 1, regulatory subunit 15A	Multiple_Complex
TC2000007336.hg.1	8.34	10.65	-4.96	3.52e-19	2.69e-17	PPP1R16B	protein phosphatase 1, regulatory subunit 16B	Multiple_Complex
TC2000007337.hg.1	7.91	9.06	-2.23	5.91e-09	1.07e-07	PPP1R16B	Transcript Identified by AceView, Entrez Gene ID(s) 26051	Unassigned
TC0600011376.hg.1	11.39	12.63	-2.35	4.13e-09	7.71e-08	PPP1R18	protein phosphatase 1, regulatory subunit 18	Multiple_Complex
TC0X00011286.hg.1	7.26	6.06	2.29	4.57e-06	4.63e-05	PPP1R3F	protein phosphatase 1, regulatory subunit 3F	Multiple_Complex
TC0500013384.hg.1	5.65	10.27	-24.64	1.77e-38	1.52e-35	PPP2R2B	protein phosphatase 2, regulatory subunit B, beta	Multiple_Complex
TC0100011520.hg.1	8.89	10.1	-2.31	4.07e-06	4.19e-05	PPP2R5A	protein phosphatase 2, regulatory subunit B, alpha	Multiple_Complex
TC0400011440.hg.1	8.41	9.8	-2.62	1.5e-05	0.0001	PPP3CA	protein phosphatase 3, catalytic subunit, alpha isozyme	Multiple_Complex
TC0200006715.hg.1	7.89	9.6	-3.27	4.11e-18	2.72e-16	PQLC3	PQ loop repeat containing 3	Multiple_Complex
TC1500010463.hg.1	4.64	5.95	-2.49	2.29e-06	2.51e-05	PRC1	protein regulator of cytokinesis 1	Multiple_Complex
TC0600008972.hg.1	7.07	14.53	-176.54	1.4e-45	1.4e-45	PRDM1	PR domain containing 1, with ZNF domain	Multiple_Complex
TC0100006937.hg.1	12.82	11.57	2.38	1.98e-08	3.26e-07	PRDM2	PR domain containing 2, with ZNF domain	Multiple_Complex
TC1200011820.hg.1	10.15	11.29	-2.2	2.22e-12	6.85e-11	PRDM4	PR domain containing 4	Multiple_Complex
TC2000009357.hg.1	11.52	12.83	-2.48	8.64e-10	1.82e-08	PREX1	phosphatidylinositol-3,4,5-trisphosphate-dependent Rac exchange factor 1	Multiple_Complex
TC1000010925.hg.1	6.21	13.82	-195.75	9.81e-45	3.27e-41	PRF1	perforin 1 (pore forming protein)	Multiple_Complex
TC1200006816.hg.1	4.51	5.53	-2.04	4.72e-05	0.0004	PRH2	proline-rich protein HaeIII subfamily 2	Coding
TC0400009503.hg.1	7.47	8.52	-2.08	3.52e-06	3.68e-05	PRIMPOL	primase and DNA directed polymerase	Multiple_Complex
TC0100015627.hg.1	6.44	7.69	-2.38	1.12e-09	2.33e-08	PRKAB2	protein kinase, AMP-activated, beta 2 non-catalytic subunit	Multiple_Complex
TC0700009980.hg.1	5.9	4.75	2.23	1.34e-09	2.73e-08	PRKAR1B	protein kinase, cAMP-dependent, regulatory, type I, beta	Multiple_Complex
TC1700008668.hg.1	6.96	5.74	2.34	9.74e-06	9.06e-05	PRKCA	Jeck2013 ALT_ACCEPTOR, ALT_DONOR, coding, INTERNAL, intronic best transcript NM_002737	NonCoding
TC1700008661.hg.1	7.78	5.5	4.86	6.32e-20	5.65e-18	PRKCA	protein kinase C, alpha	Multiple_Complex
TC1600007240.hg.1	8.74	10.56	-3.52	2.69e-16	1.4e-14	PRKCB	protein kinase C, beta	Multiple_Complex
TC1400010617.hg.1	11.28	12.84	-2.94	9.8e-09	1.72e-07	PRKCH	protein kinase C, eta	Multiple_Complex
TC1000009714.hg.1	10.24	12.32	-4.22	1.16e-14	4.97e-13	PRKCQ	protein kinase C, theta	Multiple_Complex
TC0800010360.hg.1	7.56	8.71	-2.21	6.39e-05	0.0005	PRKDC	protein kinase, DNA-activated, catalytic polypeptide	Multiple_Complex
TC0200015080.hg.1	11.65	10.6	2.07	4.39e-11	1.12e-09	PRKRA	protein kinase, interferon-inducible double stranded RNA dependent activator	Multiple_Complex
TC2100007474.hg.1	12.65	11.04	3.05	3e-14	1.21e-12	PRMT2	protein arginine methyltransferase 2	Multiple_Complex
TC0300011517.hg.1	5.72	10.88	-35.77	8.37e-20	7.21e-18	PROK2	prokineticin 2	Coding
TC0100009902.hg.1	11.32	12.37	-2.07	5.84e-06	5.75e-05	PRPF3	pre-mRNA processing factor 3	Multiple_Complex
TC0600006731.hg.1	9.58	10.63	-2.06	0.0004	0.0024	PRPF4B	pre-mRNA processing factor 4B	Multiple_Complex
TC1700011795.hg.1	8.36	9.49	-2.2	1.83e-06	2.05e-05	PRPSAP1	phosphoribosyl pyrophosphate synthetase-associated protein 1	Multiple_Complex
TC1900008547.hg.1	8.42	9.52	-2.15	0.0003	0.0016	PRR12	proline rich 12	Multiple_Complex
TC1100007301.hg.1	4.8	10.39	-47.92	9.08e-36	5.27e-33	PRR5L	proline rich 5 like	Multiple_Complex
TC0600014268.hg.1	4.95	3.83	2.17	2.77e-10	6.36e-09	PRRT1	proline-rich transmembrane protein 1	Multiple_Complex
TC1000012590.hg.1	4.41	3.41	2.01	1.76e-13	6.3e-12	PSD	pleckstrin and Sec7 domain containing	Multiple_Complex
TC1400008689.hg.1	9.14	7.69	2.75	8.16e-09	1.45e-07	PSMB5	proteasome subunit beta 5	Multiple_Complex
TC0200012608.hg.1	8.94	10.09	-2.21	2e-09	3.93e-08	PSME4	proteasome activator subunit 4	Multiple_Complex
TC0600014060.hg.1	10.81	9.67	2.2	7.44e-12	2.15e-10	PSMG4	proteasome (prosome, macropain) assembly chaperone 4	Multiple_Complex
TC1500007929.hg.1	6.39	7.85	-2.75	1.88e-09	3.73e-08	PSTPIP1	proline-serine-threonine phosphatase interacting protein 1	Multiple_Complex
TC1800008580.hg.1	5.46	7.17	-3.27	9.39e-12	2.66e-10	PSTPIP2	proline-serine-threonine phosphatase interacting protein 2	Multiple_Complex
TC1200009852.hg.1	4.5	7.78	-9.73	3.04e-19	2.35e-17	PZP	pregnancy-zone protein	Multiple_Complex
TC0900010886.hg.1	9.24	11.45	-4.62	1.05e-15	5.18e-14	PTCH1	patched 1	Multiple_Complex
TC0800008295.hg.1	11.77	10.24	2.89	3.34e-17	1.95e-15	PTDSS1	phosphatidylserine synthase 1	Multiple_Complex
TC1400007161.hg.1	4.34	9.28	-30.63	3.57e-30	1.08e-27	PTGDR	prostaglandin D2 receptor (DP)	Coding
TC1400007165.hg.1	7.31	10.06	-6.7	1.45e-15	7.03e-14	PTGER2	prostaglandin E receptor 2	Coding
TC0500007231.hg.1	9.61	10.62	-2.01	0.0006	0.0033	PTGER4	prostaglandin E receptor 4 (subtype EP4)	Multiple_Complex
TC1400010624.hg.1	6.86	5.59	2.41	4.36e-06	4.44e-05	PTGR2	prostaglandin reductase 2	Multiple_Complex
TC0800012001.hg.1	5.34	4.06	2.43	5.63e-09	1.03e-07	PTK2	protein tyrosine kinase 2	Multiple_Complex
TC0800007102.hg.1	9.52	10.9	-2.6	7.24e-11	1.8e-09	PTK2B	protein tyrosine kinase 2 beta	Multiple_Complex
TC1200006643.hg.1	5.88	9.16	-9.72	2.46e-23	3.5e-21	PTMS	parathymosin	Multiple_Complex
TC0100013588.hg.1	14.01	15.26	-2.39	1.19e-20	1.18e-18	PTP4A2	protein tyrosine phosphatase type IVA, member 2	Multiple_Complex
TC0700008141.hg.1	6.03	8.94	-7.52	9.55e-18	5.92e-16	PTPN12	protein tyrosine phosphatase, non-receptor type 12	Multiple_Complex
TC0100015333.hg.1	8.76	12.23	-11.13	4.65e-30	1.37e-27	PTPN22	protein tyrosine phosphatase, non-receptor type 22 (lymphoid)	Multiple_Complex
TC0100016945.hg.1	6.89	8.15	-2.4	4.18e-12	1.25e-10	PTPN7	protein tyrosine phosphatase, non-receptor type 7	Multiple_Complex
TC1000009296.hg.1	7.71	9.31	-3.02	2.95e-14	1.19e-12	PTPRE	protein tyrosine phosphatase, receptor type, E	Multiple_Complex
TC1100007507.hg.1	7	9.85	-7.21	2.49e-16	1.3e-14	PTPRJ	protein tyrosine phosphatase, receptor type, J	Multiple_Complex
TC0600013126.hg.1	6.61	3.56	8.28	1.35e-22	1.73e-20	PTPRK	protein tyrosine phosphatase, receptor type, K	Multiple_Complex
TC1800006589.hg.1	4.54	10.39	-57.82	1e-21	1.15e-19	PTPRM	protein tyrosine phosphatase, receptor type, M	Multiple_Complex
TC0200011990.hg.1	9.91	8.85	2.08	5.22e-05	0.0004	PTRHD1	peptidyl-tRNA hydrolase domain containing 1	Multiple_Complex
TC0500009281.hg.1	6.6	8.03	-2.7	2.87e-07	3.86e-06	PTTG1	pituitary tumor-transforming 1	Multiple_Complex
TC1100012717.hg.1	9.77	8.76	2.02	1.93e-05	0.0002	PUS3	pseudouridylate synthase 3	Coding
TC1100012535.hg.1	5.11	6.57	-2.74	1.93e-05	0.0002	PVRL1	poliovirus receptor-related 1 (herpesvirus entry mediator C)	Multiple_Complex
TC0100010243.hg.1	8.82	14.09	-38.74	6.85e-34	3.5e-31	PYHIN1	pyrin and HIN domain family, member 1	Multiple_Complex
TC1900009116.hg.1	8.34	7.16	2.27	4.59e-10	1.02e-08	R3HDM4	R3H domain containing 4	Multiple_Complex
TC1900006893.hg.1	9.58	11.01	-2.7	3.28e-05	0.0003	RAB11B	RAB11B, member RAS oncogene family	Multiple_Complex
TC0800010138.hg.1	5.96	7.54	-2.99	2.27e-11	6.03e-10	RAB11FIP1	RAB11 family interacting protein 1 (class I)	Multiple_Complex
TC0100015895.hg.1	8.79	7.09	3.24	4.7e-11	1.19e-09	RAB13	RAB13, member RAS oncogene family	Multiple_Complex
TC0700009369.hg.1	6.43	5.27	2.25	1.12e-05	0.0001	RAB19	RAB19, member RAS oncogene family	Multiple_Complex
TC1500010866.hg.1	7.81	9.98	-4.52	2.26e-17	1.34e-15	RAB27A	RAB27A, member RAS oncogene family	Multiple_Complex
TC1800007360.hg.1	4.87	8.39	-11.47	9.79e-26	1.74e-23	RAB27B	RAB27B, member RAS oncogene family	Multiple_Complex
TC0X00008401.hg.1	10.04	8.49	2.93	3.11e-09	5.91e-08	RAB33A	RAB33A, member RAS oncogene family	Coding
TC1700010207.hg.1	7.35	5.43	3.8	3.93e-05	0.0003	RAB34	RAB34, member RAS oncogene family	Multiple_Complex
TC0200009431.hg.1	6.4	4.9	2.83	4.57e-11	1.17e-09	RAB3GAP1	RAB3 GTPase activating protein subunit 1 (catalytic)	Multiple_Complex
TC0300014042.hg.1	10.15	7.61	5.8	6.87e-18	4.39e-16	RAB43	RAB43, member RAS oncogene family	Coding
TC0X00006656.hg.1	5.86	7.38	-2.88	3.12e-12	9.44e-11	RAB9A	RAB9A, member RAS oncogene family	Multiple_Complex
TC1900010781.hg.1	11.88	12.93	-2.07	2.07e-10	4.85e-09	RABAC1	Rab acceptor 1 (prenylated)	Multiple_Complex
TC0100010672.hg.1	8.54	10.64	-4.31	7.63e-15	3.38e-13	RABGAP1L	RAB GTPase activating protein 1-like	Multiple_Complex
TC1400008749.hg.1	9.76	10.96	-2.29	2.26e-07	3.11e-06	RABGGTA	Rab geranylgeranyltransferase, alpha subunit	Multiple_Complex
TC1200010650.hg.1	6.35	7.72	-2.58	3.4e-05	0.0003	RACGAP1	Rac GTPase activating protein 1	Multiple_Complex
TC0800011137.hg.1	5.35	4.11	2.36	9.96e-07	1.18e-05	RAD54B; FSBP	RAD54 homolog B (S. cerevisiae); fibrinogen silencer binding protein	Multiple_Complex
TC0X00009179.hg.1	5.53	4.35	2.26	9.11e-14	3.4e-12	RAI2	retinoic acid induced 2	Multiple_Complex
TC0700007271.hg.1	10.91	9.16	3.36	3.3e-19	2.55e-17	RALA	v-ral simian leukemia viral oncogene homolog A (ras related)	Multiple_Complex
TC1400008945.hg.1	9.65	11	-2.54	6.77e-11	1.69e-09	RALGAPA1	Ral GTPase activating protein, alpha subunit 1 (catalytic)	Multiple_Complex
TC0900011829.hg.1	9.04	10.32	-2.42	8.12e-08	1.21e-06	RALGDS	ral guanine nucleotide dissociation stimulator	Multiple_Complex
TC0100010755.hg.1	5.53	3.91	3.07	1.9e-09	3.75e-08	RALGPS2	Ral GEF with PH domain and SH3 binding motif 2	Multiple_Complex
TC2200008819.hg.1	9.07	8.03	2.07	1.59e-05	0.0001	RANGAP1	Ran GTPase activating protein 1	Multiple_Complex
TC1700006569.hg.1	3.89	7.03	-8.8	6.6e-20	5.78e-18	RAP1GAP2	RAP1 GTPase activating protein 2	Multiple_Complex
TC1300007780.hg.1	5.82	6.82	-2	2.75e-07	3.71e-06	RAP2A	RAP2A, member of RAS oncogene family	Coding
TC0900011778.hg.1	8.69	10.86	-4.49	2.3e-12	7.07e-11	RAPGEF1	Rap guanine nucleotide exchange factor 1	Multiple_Complex
TC0400012857.hg.1	6.89	8.13	-2.36	1.35e-08	2.29e-07	RAPGEF2	Rap guanine nucleotide exchange factor 2	Multiple_Complex
TC0500013350.hg.1	6.83	5.8	2.03	0.001	0.0049	RAPGEF6	Rap guanine nucleotide exchange factor 6	Multiple_Complex
TC0700013601.hg.1	7.67	6.53	2.2	5.05e-09	9.29e-08	RASA4B; RASA4	RAS p21 protein activator 4B; RAS p21 protein activator 4	Multiple_Complex
TC1900009872.hg.1	9.54	11.26	-3.29	3.78e-10	8.5e-09	RASAL3	RAS protein activator like 3	Multiple_Complex
TC1000010432.hg.1	5.79	7.22	-2.69	1.25e-10	3.02e-09	RASGEF1A	RasGEF domain family member 1A	Multiple_Complex
TC0500007925.hg.1	9.15	6.17	7.88	3.08e-18	2.09e-16	RASGRF2	Ras protein-specific guanine nucleotide-releasing factor 2	Multiple_Complex
TC1500009056.hg.1	11.3	13.66	-5.16	6.74e-20	5.88e-18	RASGRP1	RAS guanyl releasing protein 1 (calcium and DAG-regulated)	Multiple_Complex
TC1100011180.hg.1	7.4	5.64	3.4	2.5e-10	5.78e-09	RASGRP2	RAS guanyl releasing protein 2 (calcium and DAG-regulated)	Multiple_Complex
TC1200008005.hg.1	8.21	7.09	2.17	3.82e-10	8.56e-09	RASSF3	Ras association (RalGDS/AF-6) domain family member 3	Multiple_Complex
TC0100008607.hg.1	4.95	6.45	-2.83	4.33e-07	5.6e-06	RAVER2	ribonucleoprotein, PTB-binding 2	Multiple_Complex
TC2100006585.hg.1	8.26	5.3	7.81	1.55e-24	2.5e-22	RBM11	RNA binding motif protein 11	Multiple_Complex
TC1300009332.hg.1	6.72	5.36	2.56	1.02e-06	1.22e-05	RBM26	Transcript Identified by AceView, Entrez Gene ID(s) 64062	Unassigned
TC0700013619.hg.1	6.18	7.2	-2.03	4.8e-07	6.14e-06	RBM28	RNA binding motif protein 28	Multiple_Complex
TC0300013828.hg.1	12.98	14.26	-2.43	1.07e-07	1.56e-06	RBM6	RNA binding motif protein 6	Multiple_Complex
TC0600011945.hg.1	4.76	10.02	-38.26	6.23e-25	1.01e-22	RCAN2	regulator of calcineurin 2	Coding
TC0100007370.hg.1	11.22	5.79	43.25	1.91e-32	8.21e-30	RCAN3	RCAN family member 3	Multiple_Complex
TC1300008894.hg.1	4.24	6.37	-4.38	3.85e-17	2.22e-15	RCBTB2	regulator of chromosome condensation (RCC1) and BTB (POZ) domain containing protein 2	Multiple_Complex
TC1100008101.hg.1	5.48	6.66	-2.28	6.42e-11	1.6e-09	RCE1; C11orf80	Ras converting CAAX endopeptidase 1; chromosome 11 open reading frame 80	Multiple_Complex
TC0900006531.hg.1	6.39	5.33	2.09	6.42e-07	7.99e-06	RCL1	RNA terminal phosphate cyclase-like 1	Multiple_Complex
TC0800007957.hg.1	4.47	7.49	-8.1	2.35e-20	2.25e-18	RDH10	retinol dehydrogenase 10 (all-trans)	Multiple_Complex
TC1900012046.hg.1	7.23	8.73	-2.82	6.26e-07	7.79e-06	RDH13	retinol dehydrogenase 13 (all-trans/9-cis)	Multiple_Complex
TC1700010451.hg.1	5.42	7.08	-3.18	1.24e-08	2.13e-07	RDM1	RAD52 motif containing 1	Multiple_Complex
TC1100012262.hg.1	6.18	7.57	-2.62	7.08e-08	1.06e-06	RDX	radixin	Multiple_Complex
TC1400006723.hg.1	6.16	7.29	-2.19	1.24e-05	0.0001	REC8	REC8 meiotic recombination protein	Multiple_Complex
TC1200010105.hg.1	8.69	9.78	-2.13	0.0005	0.0028	RECQL	RecQ helicase-like	Multiple_Complex
TC0800009830.hg.1	5.9	7.98	-4.21	3.2e-09	6.08e-08	REEP4	receptor accessory protein 4	Multiple_Complex
TC0200016452.hg.1	11.01	12.53	-2.86	7.36e-11	1.82e-09	REL	v-rel avian reticuloendotheliosis viral oncogene homolog	Multiple_Complex
TC1500009514.hg.1	8.56	9.59	-2.05	9.59e-09	1.68e-07	RFX7	regulatory factor X, 7	Multiple_Complex
TC1300006979.hg.1	10.13	8.98	2.22	8.17e-07	9.88e-06	RGCC	regulator of cell cycle	Multiple_Complex
TC0600011535.hg.1	6.79	8.65	-3.62	7.5e-07	9.15e-06	RGL2	ral guanine nucleotide dissociation stimulator-like 2	Multiple_Complex
TC0100011012.hg.1	6.89	8.56	-3.19	3.72e-05	0.0003	RGS1	regulator of G-protein signaling 1	Multiple_Complex
TC1000012011.hg.1	16.28	13.12	8.97	5.05e-38	4.01e-35	RGS10	regulator of G-protein signaling 10	Multiple_Complex
TC0100011022.hg.1	7.74	10.07	-5	1.3e-11	3.6e-10	RGS2	regulator of G-protein signaling 2	Multiple_Complex
TC1700008635.hg.1	4.39	9.33	-30.6	1.48e-29	4.06e-27	RGS9	regulator of G-protein signaling 9	Multiple_Complex
TC1700011802.hg.1	10.53	14.42	-14.83	3.69e-29	9.64e-27	RHBDF2	rhomboid 5 homolog 2 (Drosophila)	Multiple_Complex
TC0100018463.hg.1	6.35	8.96	-6.08	1.72e-19	1.41e-17	RHOC	ras homolog family member C	Multiple_Complex
TC0400007311.hg.1	11.52	10.13	2.62	3.58e-09	6.74e-08	RHOH	ras homolog family member H	Multiple_Complex
TC1600006485.hg.1	8.62	10.06	-2.71	0.0004	0.0022	RHOT2	ras homolog family member T2	Multiple_Complex
TC0100018355.hg.1	5.16	6.85	-3.23	5.21e-13	1.75e-11	RHOU	ras homolog family member U	Multiple_Complex
TC0100018356.hg.1	4.67	6.36	-3.22	4.72e-19	3.54e-17	RHOU	ras homolog family member U	NonCoding
TC1900010375.hg.1	6.77	5.37	2.64	3.2e-09	6.08e-08	RHPN2	rhophilin, Rho GTPase binding protein 2	Multiple_Complex
TC1100010023.hg.1	6.33	5.25	2.11	8.84e-08	1.31e-06	RIC3	RIC3 acetylcholine receptor chaperone	Multiple_Complex
TC0600006653.hg.1	8.53	9.66	-2.2	2.39e-09	4.62e-08	RIPK1	receptor (TNFRSF)-interacting serine-threonine kinase 1	Multiple_Complex
TC1600006904.hg.1	5.14	4.12	2.03	1.24e-08	2.13e-07	RMI2	RecQ mediated genome instability 2	Multiple_Complex
TC2000007666.hg.1	10.56	9.54	2.03	7.11e-07	8.74e-06	RNF114	ring finger protein 114	Multiple_Complex
TC0100015588.hg.1	9.53	10.82	-2.44	1.6e-13	5.75e-12	RNF115	ring finger protein 115	Multiple_Complex
TC1100008328.hg.1	8.94	10.19	-2.38	1.55e-13	5.61e-12	RNF121	ring finger protein 121	Multiple_Complex
TC1800009223.hg.1	9.21	8.08	2.19	3.87e-09	7.26e-08	RNF138	ring finger protein 138, E3 ubiquitin protein ligase	Multiple_Complex
TC1700011787.hg.1	7.15	4.67	5.58	5.46e-19	4.05e-17	RNF157	ring finger protein 157	Multiple_Complex
TC1600011225.hg.1	8.16	9.24	-2.1	9.89e-08	1.46e-06	RNF166	ring finger protein 166	Multiple_Complex
TC1100008435.hg.1	8.39	9.45	-2.09	6.17e-08	9.37e-07	RNF169	ring finger protein 169	Multiple_Complex
TC0800011249.hg.1	8.93	11.55	-6.12	6.83e-22	8.04e-20	RNF19A	ring finger protein 19A, RBR E3 ubiquitin protein ligase	Multiple_Complex
TC0400012886.hg.1	4.71	3.62	2.12	6.91e-09	1.24e-07	RNF212	ring finger protein 212	NonCoding
TC1700009123.hg.1	8.24	9.72	-2.78	1.36e-06	1.58e-05	RNF213	ring finger protein 213	Multiple_Complex
TC0300011628.hg.1	5.42	3.66	3.37	9.87e-15	4.29e-13	ROBO1	roundabout guidance receptor 1	Multiple_Complex
TC0200011745.hg.1	7.12	8.49	-2.59	2.97e-05	0.0002	ROCK2	Rho-associated, coiled-coil containing protein kinase 2	Multiple_Complex
TC1500009641.hg.1	13.9	15.47	-2.96	1.01e-12	3.24e-11	RORA	RAR-related orphan receptor A	Multiple_Complex
TC1000012430.hg.1	6.39	7.96	-2.96	5.16e-07	6.54e-06	RP11-295P9.3; PRPF18	novel transcript; Transcript Identified by AceView, Entrez Gene ID(s) 8559; RP11-295P9.3 (from geneSymbol)	NonCoding
TC0700010247.hg.1	11.56	10.51	2.07	2.05e-05	0.0002	RPA3	replication protein A3	Multiple_Complex
TC0600007800.hg.1	14.69	13.4	2.45	4.7e-18	3.08e-16	RPL10A	ribosomal protein L10a	Multiple_Complex
TC1600008888.hg.1	15.67	14.47	2.3	1.82e-13	6.5e-12	RPL13; SNORD68	ribosomal protein L13; small nucleolar RNA, C/D box 68	Multiple_Complex
TC0100012670.hg.1	17.08	15.94	2.2	2.91e-19	2.26e-17	RPL22	ribosomal protein L22	Multiple_Complex
TC0300013103.hg.1	10.12	8.93	2.27	7.83e-05	0.0006	RPL22L1	ribosomal protein L22-like 1	Multiple_Complex
TC0300013458.hg.1	7.78	8.92	-2.2	1.37e-05	0.0001	RPL39L	ribosomal protein L39-like	Coding
TC1500010884.hg.1	13.59	12.5	2.14	1.52e-13	5.52e-12	RPL4; SNORD16; SNORD18A; SNORD18B; SNORD18C	ribosomal protein L4; small nucleolar RNA, C/D box 16; small nucleolar RNA, C/D box 18A; small nucleolar RNA, C/D box 18B; small nucleolar RNA, C/D box 18C	Multiple_Complex
TC1100013147.hg.1	16.41	14.78	3.09	5.47e-13	1.82e-11	RPS13; SNORD14B	ribosomal protein S13; small nucleolar RNA, C/D box 14B	Multiple_Complex
TC1900006532.hg.1	15.79	14.52	2.41	1.58e-10	3.76e-09	RPS15	ribosomal protein S15	Multiple_Complex
TC0100007469.hg.1	5.4	6.72	-2.49	8.55e-09	1.52e-07	RPS6KA1	ribosomal protein S6 kinase, 90kDa, polypeptide 1	Multiple_Complex
TC0100011554.hg.1	5.4	6.58	-2.27	7.59e-07	9.25e-06	RPS6KC1	ribosomal protein S6 kinase, 52kDa, polypeptide 1	Multiple_Complex
TC1900011698.hg.1	7.45	6.4	2.08	5.11e-09	9.38e-08	RPSAP58; RPSA	ribosomal protein SA pseudogene 58; ribosomal protein SA	Multiple_Complex
TC0600012544.hg.1	9.33	7.4	3.82	3.52e-11	9.1e-10	RRAGD	Ras-related GTP binding D	Multiple_Complex
TC2000008499.hg.1	8.73	10.57	-3.58	7.94e-13	2.59e-11	RRBP1	ribosome binding protein 1	Multiple_Complex
TC1600009420.hg.1	10.34	8.76	3	2.66e-13	9.31e-12	RSL1D1	ribosomal L1 domain containing 1	Multiple_Complex
TC0600013740.hg.1	5.17	6.83	-3.17	4.56e-14	1.78e-12	RSPH3	radial spoke 3 homolog (Chlamydomonas)	Multiple_Complex
TC2200008514.hg.1	11.57	10.16	2.66	5.28e-11	1.33e-09	RTCB	RNA 2,3-cyclic phosphate and 5-OH ligase	Multiple_Complex
TC1100007906.hg.1	9.92	11.01	-2.13	5.04e-07	6.41e-06	RTN3	reticulon 3	Multiple_Complex
TC0200011431.hg.1	4.51	6.24	-3.32	1.48e-13	5.39e-12	RTP5	receptor (chemosensory) transporter protein 5 (putative)	Coding
TC2100008562.hg.1	13.22	15.01	-3.45	1.45e-18	1.03e-16	RUNX1	runt-related transcription factor 1	Multiple_Complex
TC0100013339.hg.1	13.42	14.61	-2.28	2.67e-14	1.09e-12	RUNX3	runt-related transcription factor 3	Multiple_Complex
TC0100015866.hg.1	9.24	11.14	-3.73	3.06e-10	6.97e-09	S100A4	S100 calcium binding protein A4	Multiple_Complex
TC2100008477.hg.1	8.85	4.38	22.14	1.44e-20	1.41e-18	S100B	S100 calcium binding protein B	Coding
TC1900009633.hg.1	4.52	11.26	-107.08	1.15e-38	1.07e-35	S1PR5	sphingosine-1-phosphate receptor 5	Coding
TC0800011601.hg.1	6.12	3.77	5.1	4.61e-15	2.11e-13	SAMD12	sterile alpha motif domain containing 12	Multiple_Complex
TC0600013160.hg.1	9.56	12.95	-10.49	5.47e-25	9.09e-23	SAMD3	sterile alpha motif domain containing 3	Multiple_Complex
TC2100007599.hg.1	11.11	13.01	-3.75	1.56e-07	2.22e-06	SAMSN1	SAM domain, SH3 domain and nuclear localization signals 1	Multiple_Complex
TC0200014192.hg.1	11.42	12.73	-2.47	6.14e-10	1.33e-08	SAP130	Sin3A associated protein 130kDa	Multiple_Complex
TC0400009330.hg.1	7.48	9.38	-3.73	7.14e-17	4.05e-15	SAP30	Sin3A associated protein 30kDa	Multiple_Complex
TC0800010016.hg.1	12.88	11.25	3.11	2.26e-19	1.82e-17	SARAF	store-operated calcium entry-associated regulatory factor	Multiple_Complex
TC0X00008388.hg.1	7.97	9.18	-2.31	1.16e-09	2.4e-08	SASH3	SAM and SH3 domain containing 3	Multiple_Complex
TC0300013949.hg.1	14.36	12.9	2.74	1.65e-10	3.9e-09	SATB1	SATB homeobox 1	Multiple_Complex
TC0200015364.hg.1	5.15	7.31	-4.46	9.12e-13	2.95e-11	SATB2	SATB homeobox 2	Multiple_Complex
TC1100009306.hg.1	9.12	7.9	2.33	2.57e-07	3.48e-06	SC5D	sterol-C5-desaturase	Multiple_Complex
TC0100012278.hg.1	7.89	6.63	2.41	1.35e-07	1.94e-06	SCCPDH	saccharopine dehydrogenase (putative)	Multiple_Complex
TC1000008643.hg.1	10.03	8.94	2.13	4.45e-06	4.52e-05	SCD	stearoyl-CoA desaturase (delta-9-desaturase)	Multiple_Complex
TC0400011180.hg.1	4.28	5.73	-2.74	8.81e-11	2.17e-09	SCD5	stearoyl-CoA desaturase 5	Coding
TC0X00006715.hg.1	9.7	4.45	38.1	4.27e-33	1.95e-30	SCML1	sex comb on midleg-like 1 (Drosophila)	Multiple_Complex
TC0X00009185.hg.1	5.15	4.01	2.21	2.74e-10	6.31e-09	SCML2	sex comb on midleg-like 2 (Drosophila)	Multiple_Complex
TC0600012763.hg.1	9.74	10.93	-2.28	1.1e-07	1.6e-06	SCML4	sex comb on midleg-like 4 (Drosophila)	Multiple_Complex
TC0400012437.hg.1	3.8	5.17	-2.58	5.33e-10	1.17e-08	SCRG1	stimulator of chondrogenesis 1	Coding
TC0700010619.hg.1	8.13	5.06	8.41	3.65e-14	1.45e-12	SCRN1	secernin 1	Multiple_Complex
TC2000009964.hg.1	6.89	5.75	2.2	5.74e-08	8.8e-07	SDCBP2	syndecan binding protein (syntenin) 2	Multiple_Complex
TC0700008430.hg.1	10.87	9.78	2.14	5.55e-07	6.98e-06	SDHAF3	succinate dehydrogenase complex assembly factor 3	Multiple_Complex
TC1700011653.hg.1	10.59	4.77	56.51	1.58e-27	3.26e-25	SDK2	sidekick cell adhesion molecule 2	Multiple_Complex
TC2200009252.hg.1	6.85	5.74	2.15	9.55e-07	1.14e-05	SEC14L2	SEC14-like lipid binding 2	Multiple_Complex
TC0400011695.hg.1	9.6	11.16	-2.95	8.7e-13	2.83e-11	SEC24D	SEC24 homolog D, COPII coat complex component	Multiple_Complex
TC1000012586.hg.1	7.93	9.33	-2.64	1.87e-05	0.0002	SEC31B	SEC31 homolog B, COPII coat complex component	Multiple_Complex
TC0300008713.hg.1	5.89	7.34	-2.72	6.63e-06	6.42e-05	SEC61A1	Sec61 translocon alpha 1 subunit	Multiple_Complex
TC1000006796.hg.1	5.99	7.15	-2.24	2.85e-05	0.0002	SEC61A2	Sec61 translocon alpha 2 subunit	Multiple_Complex
TC1700012110.hg.1	6.87	5.51	2.57	1.61e-06	1.83e-05	SECTM1	secreted and transmembrane 1	Multiple_Complex
TC1400009842.hg.1	8.43	9.46	-2.05	6.33e-05	0.0005	SEL1L	sel-1 suppressor of lin-12-like (C. elegans)	Multiple_Complex
TC0100016360.hg.1	7.45	4.87	5.98	5.02e-08	7.76e-07	SELL	Memczak2013 ALT_ACCEPTOR, ALT_DONOR, coding, INTERNAL, intronic best transcript NM_000655	NonCoding
TC0100016359.hg.1	15.33	9.72	48.96	1.05e-39	1.25e-36	SELL	selectin L	Multiple_Complex
TC2200008465.hg.1	7.82	6.77	2.07	1.65e-07	2.34e-06	SELM	selenoprotein M; selenoprotein M [Source:EntrezGene;Acc:140606]; Salzman2013 ANNOTATED, CDS, coding, OVCODE, OVERLAPTX, OVEXON, UTR3 best transcript NM_080430; Salzman2013 ANNOTATED, CDS, coding, OVCODE, OVERLAPTX, OVEXON, UTR3, UTR5 best transcript NM_080430; Transcript Identified by AceView, Entrez Gene ID(s) 140606	Multiple_Complex
TC0900007869.hg.1	15.24	14.21	2.04	0.0002	0.0013	SEMA4D	Memczak2013 ANTISENSE, coding, INTERNAL, UTR3 best transcript NM_006378	NonCoding
TC0100018200.hg.1	8	6.47	2.88	3.25e-11	8.43e-10	SEPN1	selenoprotein N, 1	Multiple_Complex
TC0500011263.hg.1	5.85	4.65	2.3	7.62e-08	1.14e-06	SERINC5	Memczak2013 ALT_ACCEPTOR, ALT_DONOR, coding, INTERNAL, intronic best transcript NM_001174072	NonCoding
TC0500011260.hg.1	8.96	5.96	8	1.11e-23	1.61e-21	SERINC5	serine incorporator 5	Multiple_Complex
TC0600014220.hg.1	11.39	12.49	-2.15	0.0005	0.0028	SERPINB9	serpin peptidase inhibitor, clade B (ovalbumin), member 9	Multiple_Complex
TC0300009412.hg.1	6.5	7.92	-2.69	1.39e-08	2.35e-07	SERPINI1	serpin peptidase inhibitor, clade I (neuroserpin), member 1	Multiple_Complex
TC0600012801.hg.1	6.79	8.14	-2.55	2.17e-06	2.4e-05	SESN1	sestrin 1	Multiple_Complex
TC0100007552.hg.1	5.71	7.19	-2.78	4.33e-08	6.77e-07	SESN2	sestrin 2	Multiple_Complex
TC1100012019.hg.1	8.3	6.15	4.46	1.01e-08	1.77e-07	SESN3	sestrin 3	Multiple_Complex
TC1100012020.hg.1	6.3	3.83	5.51	6.7e-07	8.3e-06	SESN3	Transcript Identified by AceView, Entrez Gene ID(s) 143686	Unassigned
TC1800007186.hg.1	5.12	10.85	-53.13	5.5e-36	3.28e-33	SETBP1	SET binding protein 1	Multiple_Complex
TC0100010525.hg.1	8.96	9.99	-2.03	1.61e-10	3.82e-09	SFT2D2	SFT2 domain containing 2	Multiple_Complex
TC1000008668.hg.1	8.92	10.18	-2.39	3.69e-06	3.84e-05	SFXN3	sideroflexin 3	Multiple_Complex
TC0600013231.hg.1	7.43	4.82	6.11	8.3e-15	3.65e-13	SGK1	serum/glucocorticoid regulated kinase 1	Multiple_Complex
TC0800009511.hg.1	6.35	4.65	3.25	1.78e-15	8.54e-14	SGK223	homolog of rat pragma of Rnd2; Tyrosine-protein kinase SgK223 [Source:UniProtKB/Swiss-Prot;Acc:Q86YV5]	Coding
TC0500010932.hg.1	9.16	7.75	2.66	1.99e-08	3.27e-07	SGTB	small glutamine-rich tetratricopeptide repeat (TPR)-containing, beta	Multiple_Complex
TC0X00008344.hg.1	9.76	11.33	-2.97	1e-11	2.83e-10	SH2D1A	SH2 domain containing 1A	Multiple_Complex
TC0100016206.hg.1	3.85	5.26	-2.65	2.6e-06	2.82e-05	SH2D1B	SH2 domain containing 1B	Multiple_Complex
TC0100016024.hg.1	8.9	13.12	-18.67	1e-37	7.66e-35	SH2D2A	SH2 domain containing 2A	Multiple_Complex
TC0600008622.hg.1	5.73	4.27	2.75	1.21e-14	5.15e-13	SH3BGRL2	SH3 domain binding glutamate-rich protein like 2	Multiple_Complex
TC0400006578.hg.1	6.04	7.8	-3.38	1.71e-10	4.02e-09	SH3BP2	SH3-domain binding protein 2	Multiple_Complex
TC0300010399.hg.1	7.25	8.29	-2.05	4.46e-09	8.29e-08	SH3BP5	SH3-domain binding protein 5 (BTK-associated)	Multiple_Complex
TC0X00009205.hg.1	11.34	12.91	-2.98	1.28e-15	6.26e-14	SH3KBP1	SH3-domain kinase binding protein 1	Multiple_Complex
TC0200008811.hg.1	5.14	4.01	2.18	2.07e-11	5.53e-10	SH3RF3	SH3 domain containing ring finger 3	Multiple_Complex
TC1100009168.hg.1	8.54	9.88	-2.53	7e-10	1.49e-08	SIDT2	SID1 transmembrane family, member 2	Multiple_Complex
TC1100009666.hg.1	7.62	8.93	-2.48	3.32e-09	6.29e-08	SIGIRR	single immunoglobulin and toll-interleukin 1 receptor (TIR) domain	Multiple_Complex
TC1900011255.hg.1	5.52	6.78	-2.41	1.2e-09	2.47e-08	SIGLEC10	sialic acid binding Ig-like lectin 10	Multiple_Complex
TC1100012424.hg.1	8.45	9.53	-2.12	1.88e-08	3.11e-07	SIK3	SIK family kinase 3	Multiple_Complex
TC2000009971.hg.1	7.34	4.45	7.39	2.96e-23	4.1e-21	SIRPG	signal-regulatory protein gamma	Multiple_Complex
TC1700012482.hg.1	5.82	6.85	-2.03	2.01e-05	0.0002	SIRT7	sirtuin 7	Multiple_Complex
TC1700011281.hg.1	7.86	8.93	-2.1	9.87e-08	1.45e-06	SKA2	spindle and kinetochore associated complex subunit 2	Multiple_Complex
TC0700013527.hg.1	5.9	7.43	-2.9	4.28e-11	1.1e-09	SKAP2	src kinase associated phosphoprotein 2	Multiple_Complex
TC2000009013.hg.1	6.83	9.62	-6.92	5.59e-20	5.08e-18	SLA2	Src-like-adaptor 2	Coding
TC0100010303.hg.1	5.84	10.17	-20.04	2.32e-19	1.85e-17	SLAMF6	Memczak2013 ANTISENSE, coding, INTERNAL, intronic best transcript NM_052931	NonCoding
TC0100016135.hg.1	10.05	13.18	-8.76	4.65e-26	8.59e-24	SLAMF6	SLAM family member 6	Coding
TC0100010310.hg.1	7.59	12.36	-27.29	1.12e-42	2.01e-39	SLAMF7	SLAM family member 7	Multiple_Complex
TC1800007198.hg.1	5.12	6.23	-2.16	5.49e-07	6.93e-06	SLC14A1	solute carrier family 14 (urea transporter), member 1 (Kidd blood group)	Multiple_Complex
TC1100011014.hg.1	6.16	4.65	2.85	4.27e-12	1.27e-10	SLC15A3	solute carrier family 15 (oligopeptide transporter), member 3	Multiple_Complex
TC1200012417.hg.1	7.54	11.72	-18.18	3.37e-32	1.39e-29	SLC15A4	solute carrier family 15 (oligopeptide transporter), member 4	Multiple_Complex
TC0600009143.hg.1	6.25	4.26	3.99	1.97e-18	1.38e-16	SLC16A10	solute carrier family 16 (aromatic amino acid transporter), member 10	Multiple_Complex
TC0100015234.hg.1	5.74	6.96	-2.33	2.06e-08	3.38e-07	SLC16A4	solute carrier family 16, member 4	Multiple_Complex
TC2000008037.hg.1	6.11	7.45	-2.53	2.92e-08	4.68e-07	SLC17A9	solute carrier family 17 (vesicular nucleotide transporter), member 9	Multiple_Complex
TC0200007821.hg.1	5.87	7.56	-3.22	1.47e-09	2.96e-08	SLC1A4	solute carrier family 1 (glutamate/neutral amino acid transporter), member 4	Multiple_Complex
TC1900011004.hg.1	6.75	8.66	-3.76	3.72e-17	2.16e-15	SLC1A5	solute carrier family 1 (neutral amino acid transporter), member 5	Multiple_Complex
TC0200008930.hg.1	6.69	8.95	-4.8	3.69e-15	1.72e-13	SLC20A1	solute carrier family 20 (phosphate transporter), member 1	Multiple_Complex
TC1400008714.hg.1	8.78	6.91	3.65	5.39e-23	7.14e-21	SLC22A17	solute carrier family 22, member 17	Multiple_Complex
TSUnmapped00000762.hg.1	5.66	6.91	-2.36	1.94e-06	2.17e-05	SLC25A26	solute carrier family 25 (S-adenosylmethionine carrier), member 26	Coding
TC0Y00006882.hg.1	13.01	11.96	2.08	4.68e-11	1.19e-09	SLC25A6	solute carrier family 25 (mitochondrial carrier; adenine nucleotide translocator), member 6	Multiple_Complex
TC0X00008908.hg.1	12.22	10.94	2.42	2.96e-11	7.78e-10	SLC25A6	solute carrier family 25 (mitochondrial carrier; adenine nucleotide translocator), member 6	Multiple_Complex
TC1500007196.hg.1	3.96	5.13	-2.26	0.0033	0.0135	SLC27A2	solute carrier family 27 (fatty acid transporter), member 2	Multiple_Complex
TC0100018299.hg.1	6.06	7.86	-3.49	7.05e-14	2.68e-12	SLC27A3	solute carrier family 27 (fatty acid transporter), member 3	Multiple_Complex
TC1900012062.hg.1	8.43	7.34	2.12	1.31e-08	2.23e-07	SLC27A5	solute carrier family 27 (fatty acid transporter), member 5	Multiple_Complex
TC0100013908.hg.1	10.6	11.79	-2.28	7.67e-08	1.15e-06	SLC2A1	solute carrier family 2 (facilitated glucose transporter), member 1	Multiple_Complex
TC1200009796.hg.1	13.45	14.91	-2.75	1.72e-07	2.42e-06	SLC2A14	solute carrier family 2 (facilitated glucose transporter), member 14	Multiple_Complex
TC1200009800.hg.1	12.85	14.33	-2.79	2.03e-07	2.8e-06	SLC2A3	solute carrier family 2 (facilitated glucose transporter), member 3	Multiple_Complex
TC1700011059.hg.1	10.18	11.64	-2.76	2.69e-06	2.9e-05	SLC35B1	solute carrier family 35, member B1	Multiple_Complex
TC0300008919.hg.1	4.74	6.1	-2.55	2.09e-06	2.32e-05	SLC35G2	solute carrier family 35, member G2	Multiple_Complex
TC1700011629.hg.1	4.92	6.02	-2.15	9.14e-06	8.55e-05	SLC39A11	solute carrier family 39, member 11	Multiple_Complex
TC0400012949.hg.1	10.24	8.7	2.9	6.94e-06	6.69e-05	SLC39A8	solute carrier family 39 (zinc transporter), member 8	Multiple_Complex
TC0400007799.hg.1	4.31	6.85	-5.81	2.97e-22	3.66e-20	SLC4A4	solute carrier family 4 (sodium bicarbonate cotransporter), member 4	Multiple_Complex
TC0300010561.hg.1	9.77	11.31	-2.92	4.78e-13	1.61e-11	SLC4A7	solute carrier family 4, sodium bicarbonate cotransporter, member 7	Multiple_Complex
TC1200007640.hg.1	6.1	7.36	-2.4	8.13e-10	1.71e-08	SLC4A8	solute carrier family 4, sodium bicarbonate cotransporter, member 8	Multiple_Complex
TC0300013919.hg.1	7.65	9.12	-2.77	4.86e-07	6.2e-06	SLC51A	solute carrier family 51, alpha subunit	NonCoding
TC2100008496.hg.1	11.38	9.35	4.08	2.93e-18	2e-16	SLC5A3; MRPS6	solute carrier family 5 (sodium/myo-inositol cotransporter), member 3; mitochondrial ribosomal protein S6	Multiple_Complex
TC0300006677.hg.1	9.72	11.52	-3.48	2.13e-13	7.54e-12	SLC6A6	solute carrier family 6 (neurotransmitter transporter), member 6	Multiple_Complex
TC1600011186.hg.1	5.79	8.88	-8.55	3.17e-10	7.21e-09	SLC7A5	solute carrier family 7 (amino acid transporter light chain, L system), member 5	Multiple_Complex
TC1600008190.hg.1	13.38	11.41	3.92	7.41e-20	6.44e-18	SLC7A6	solute carrier family 7 (amino acid transporter light chain, y+L system), member 6	Multiple_Complex
TC1400008705.hg.1	6.85	3.74	8.64	2.29e-21	2.51e-19	SLC7A8	solute carrier family 7 (amino acid transporter light chain, L system), member 8	Multiple_Complex
TC1200011993.hg.1	10.85	8.64	4.65	4.28e-13	1.46e-11	SLC8B1	solute carrier family 8 (sodium/lithium/calcium exchanger), member B1	Multiple_Complex
TC0X00009541.hg.1	3.74	5.05	-2.49	2.71e-07	3.66e-06	SLC9A7	solute carrier family 9, subfamily A (NHE7, cation proton antiporter 7), member 7	Multiple_Complex
TC0300012686.hg.1	5.14	6.21	-2.09	1.3e-05	0.0001	SLC9A9	solute carrier family 9, subfamily A (NHE9, cation proton antiporter 9), member 9	Multiple_Complex
TC2000008023.hg.1	5.07	3.79	2.43	6.87e-07	8.49e-06	SLCO4A1	solute carrier organic anion transporter family, member 4A1	Multiple_Complex
TC0500011596.hg.1	4.03	5.97	-3.84	1.91e-12	5.94e-11	SLCO4C1	solute carrier organic anion transporter family, member 4C1	Coding
TC0500008107.hg.1	6.62	7.87	-2.38	2.36e-11	6.28e-10	SLF1	SMC5-SMC6 complex localization factor 1	Multiple_Complex
TC1700010420.hg.1	8.03	10.18	-4.44	3.76e-14	1.49e-12	SLFN11	schlafen family member 11	Multiple_Complex
TC1700010425.hg.1	7.37	8.53	-2.23	3.05e-08	4.88e-07	SLFN12	schlafen family member 12	Multiple_Complex
TC1700012387.hg.1	7.02	9.87	-7.23	2.04e-22	2.56e-20	SLFN12L	schlafen family member 12-like	Multiple_Complex
TC1700010426.hg.1	8.99	11.43	-5.44	2.29e-10	5.31e-09	SLFN13	schlafen family member 13	Multiple_Complex
TC1600011371.hg.1	6.13	7.31	-2.26	4.44e-09	8.26e-08	SLX1A; SLX1B	SLX1 homolog A, structure-specific endonuclease subunit; SLX1 homolog B, structure-specific endonuclease subunit	Multiple_Complex
TC1600007449.hg.1	9.23	10.9	-3.19	1.01e-10	2.47e-09	SLX1A; SLX1B; SLX1A-SULT1A3; SLX1B-SULT1A4; SULT1A3	SLX1 homolog A, structure-specific endonuclease subunit; SLX1 homolog B, structure-specific endonuclease subunit; SLX1A-SULT1A3 readthrough (NMD candidate); SLX1B-SULT1A4 readthrough (NMD candidate); sulfotransferase family 1A member 3	Multiple_Complex
TC1600011373.hg.1	7.49	9.25	-3.39	2.4e-07	3.28e-06	SLX1A-SULT1A3	SLX1A-SULT1A3 readthrough (NMD candidate)	Multiple_Complex
TC1600009199.hg.1	7.32	8.84	-2.87	1.54e-10	3.66e-09	SLX4	SLX4 structure-specific endonuclease subunit	Multiple_Complex
TC0500013232.hg.1	8.58	10.4	-3.53	1.13e-12	3.61e-11	SMAD5	SMAD family member 5	Multiple_Complex
TC1800008650.hg.1	7.26	10.23	-7.87	8.9e-18	5.6e-16	SMAD7	SMAD family member 7	Multiple_Complex
TC0100007954.hg.1	15.37	14.11	2.4	1.48e-19	1.24e-17	SMAP2	small ArfGAP2	Multiple_Complex
TC0300009337.hg.1	7.99	9.25	-2.39	2.03e-06	2.26e-05	SMC4	structural maintenance of chromosomes 4	Multiple_Complex
TC0200016637.hg.1	5.57	7.41	-3.58	4.11e-10	9.16e-09	SMC6	structural maintenance of chromosomes 6	Multiple_Complex
TC2200009279.hg.1	13.44	11.31	4.37	2.63e-11	6.95e-10	SMDT1	single-pass membrane protein with aspartate-rich tail 1	Multiple_Complex
TC1600009620.hg.1	10.88	12.44	-2.96	1.89e-06	2.12e-05	SMG1	SMG1 phosphatidylinositol 3-kinase-related kinase	Multiple_Complex
TC1400010620.hg.1	9.8	8.48	2.5	7.25e-07	8.89e-06	SNAPC1	small nuclear RNA activating complex polypeptide 1	Multiple_Complex
TC0200011379.hg.1	8.76	6.14	6.18	8.96e-09	1.59e-07	SNED1	sushi, nidogen and EGF-like domains 1	Multiple_Complex
TC1600006926.hg.1	6.63	5.4	2.35	3.65e-13	1.26e-11	SNN	stannin	Coding
TC0900011998.hg.1	12.59	10.7	3.7	1.49e-13	5.41e-12	SNORA17A; SNORA17B; SNHG7	small nucleolar RNA, H/ACA box 17A; small nucleolar RNA, H/ACA box 17B; small nucleolar RNA host gene 7	Multiple_Complex
TC1700007017.hg.1	14.07	12.54	2.88	1.29e-17	7.89e-16	SNORD49A; SNORD65; LRRC75A-AS1	small nucleolar RNA, C/D box 49A; small nucleolar RNA, C/D box 65; LRRC75A antisense RNA 1	Multiple_Complex
TC0100011276.hg.1	14.24	13.05	2.27	2.88e-09	5.5e-08	SNRPE	small nuclear ribonucleoprotein polypeptide E	Multiple_Complex
TC1500010698.hg.1	13.53	12.19	2.54	4.29e-13	1.46e-11	SNRPN; SNURF; SNORD107; PWARSN	small nuclear ribonucleoprotein polypeptide N; SNRPN upstream reading frame; small nucleolar RNA, C/D box 107; Prader Willi/Angelman region RNA, SNRPN neighbor	Multiple_Complex
TC1600010276.hg.1	4.96	6.25	-2.45	8.79e-09	1.56e-07	SNX20	sorting nexin 20	Multiple_Complex
TC0500008483.hg.1	4.84	6.14	-2.47	4.29e-08	6.72e-07	SNX24	sorting nexin 24	Multiple_Complex
TC2000009986.hg.1	9.65	10.7	-2.08	1.42e-09	2.86e-08	SNX5	sorting nexin 5	Multiple_Complex
TC0600014196.hg.1	12.67	9.15	11.51	2.52e-22	3.14e-20	SNX9	sorting nexin 9	Multiple_Complex
TC1600009395.hg.1	7.82	6.8	2.02	3.81e-09	7.16e-08	SOCS1	suppressor of cytokine signaling 1	Coding
TC0100011282.hg.1	10.46	11.59	-2.19	3.27e-10	7.42e-09	SOX13	SRY box 13	Multiple_Complex
TC0200011020.hg.1	10.1	12.13	-4.08	1.44e-13	5.25e-12	SP140	SP140 nuclear body protein	Multiple_Complex
TC1700008144.hg.1	7.49	8.62	-2.19	1.48e-08	2.49e-07	SP2	Sp2 transcription factor	Multiple_Complex
TC0100014127.hg.1	6.74	5.44	2.46	5.63e-07	7.07e-06	SPATA6	spermatogenesis associated 6	Multiple_Complex
TC1700007204.hg.1	4.56	6.32	-3.4	1.59e-11	4.37e-10	SPECC1	sperm antigen with calponin homology and coiled-coil domains 1	Multiple_Complex
TC2200009234.hg.1	9.64	7.98	3.15	4.17e-09	7.77e-08	SPECC1L-ADORA2A	SPECC1L-ADORA2A readthrough (NMD candidate)	Multiple_Complex
TC0500007136.hg.1	5.18	6.37	-2.27	2.71e-07	3.65e-06	SPEF2	sperm flagellar 2	Multiple_Complex
TC1500009261.hg.1	8.21	9.3	-2.13	1.83e-05	0.0002	SPG11	spastic paraplegia 11 (autosomal recessive)	Multiple_Complex
TC1300008614.hg.1	10.12	6.43	12.98	1.76e-19	1.44e-17	SPG20	spastic paraplegia 20 (Troyer syndrome)	Multiple_Complex
TC0800007529.hg.1	7.72	9.32	-3.03	1.79e-12	5.59e-11	SPIDR	scaffolding protein involved in DNA repair	Multiple_Complex
TC0400010780.hg.1	7.05	4.84	4.6	2.2e-18	1.53e-16	SPINK2	serine peptidase inhibitor, Kazal type 2 (acrosin-trypsin inhibitor)	Multiple_Complex
TC1900011725.hg.1	9.38	5.25	17.6	7.48e-28	1.62e-25	SPINT2	serine peptidase inhibitor, Kunitz type, 2	Multiple_Complex
TC1600011449.hg.1	5.05	6.17	-2.18	9.14e-07	1.09e-05	SPIRE2	spire-type actin nucleation factor 2	NonCoding
TC1600009935.hg.1	9.31	11.85	-5.84	6.35e-15	2.85e-13	SPN	Memczak2013 ANTISENSE, CDS, coding, INTERNAL best transcript NM_003123	NonCoding
TC1600011374.hg.1	9.26	10.72	-2.74	3.75e-13	1.29e-11	SPN	sialophorin	Multiple_Complex
TC1000010976.hg.1	11.3	10.17	2.18	0.0001	0.0009	SPOCK2	sparc/osteonectin, cwcv and kazal-like domains proteoglycan (testican) 2	Multiple_Complex
TC1100006911.hg.1	4.86	3.8	2.08	2.05e-09	4.01e-08	SPON1	spondin 1, extracellular matrix protein	Multiple_Complex
TC0200009487.hg.1	6.56	8.02	-2.75	1.05e-08	1.83e-07	SPOPL	speckle-type POZ protein-like	Multiple_Complex
TC0400008628.hg.1	5.97	4.35	3.07	2.15e-12	6.63e-11	SPRY1	sprouty RTK signaling antagonist 1	Multiple_Complex
TC0200007609.hg.1	12.59	10.71	3.68	5.84e-16	2.96e-14	SPTBN1	spectrin, beta, non-erythrocytic 1	Multiple_Complex
TC1700009949.hg.1	11.64	9.41	4.67	5.36e-14	2.07e-12	SREBF1	sterol regulatory element binding transcription factor 1	Multiple_Complex
TC2200007495.hg.1	12.82	11.64	2.27	1.42e-05	0.0001	SREBF2	sterol regulatory element binding transcription factor 2	Multiple_Complex
TC0100011364.hg.1	7.69	9.62	-3.8	3.8e-18	2.55e-16	SRGAP2	SLIT-ROBO Rho GTPase activating protein 2	Multiple_Complex
TC0100015572.hg.1	7.33	9.53	-4.61	2.46e-14	1.01e-12	SRGAP2B	SLIT-ROBO Rho GTPase activating protein 2B	Multiple_Complex
TC0100009658.hg.1	8.18	10.16	-3.94	4.52e-13	1.53e-11	SRGAP2C	SLIT-ROBO Rho GTPase activating protein 2C	Multiple_Complex
TC1000010870.hg.1	16	17.33	-2.51	2.18e-18	1.52e-16	SRGN	Memczak2013 ANTISENSE, coding, INTERNAL, UTR3 best transcript NM_002727	NonCoding
TC1000007883.hg.1	11.15	12.37	-2.34	7.78e-12	2.24e-10	SRGN	serglycin	Multiple_Complex
TC0600012536.hg.1	7.5	8.53	-2.03	0.0002	0.0011	SRSF12	serine/arginine-rich splicing factor 12	Multiple_Complex
TC1700011820.hg.1	10.94	12.38	-2.72	0.0001	0.0008	SRSF2; MIR636	serine/arginine-rich splicing factor 2; microRNA 636	Multiple_Complex
TC1900007386.hg.1	6.93	8.31	-2.59	1.73e-13	6.21e-12	SSBP4	single stranded DNA binding protein 4	Multiple_Complex
TC1200012841.hg.1	6.91	8.6	-3.24	1.22e-08	2.09e-07	SSH1	slingshot protein phosphatase 1	Multiple_Complex
TC0100008061.hg.1	7.33	8.52	-2.28	4.9e-06	4.92e-05	SZT2	seizure threshold 2 homolog (mouse)	Multiple_Complex
TC1500010899.hg.1	9.51	8.39	2.18	9.24e-08	1.37e-06	ST20-MTHFS	ST20-MTHFS readthrough	Multiple_Complex
TC1100009453.hg.1	3.86	5.35	-2.82	4.92e-09	9.06e-08	ST3GAL4	ST3 beta-galactoside alpha-2,3-sialyltransferase 4	Multiple_Complex
TC0200013298.hg.1	8.47	9.53	-2.09	0.0008	0.0039	ST3GAL5	ST3 beta-galactoside alpha-2,3-sialyltransferase 5	Multiple_Complex
TC0100008779.hg.1	6.33	5.16	2.25	7.94e-08	1.18e-06	ST6GALNAC3	ST6 (alpha-N-acetyl-neuraminyl-2,3-beta-galactosyl-1,3)-N-acetylgalactosaminide alpha-2,6-sialyltransferase 3	Multiple_Complex
TC0900012278.hg.1	11.11	12.21	-2.15	5.59e-08	8.59e-07	ST6GALNAC6	ST6 (alpha-N-acetyl-neuraminyl-2,3-beta-galactosyl-1,3)-N-acetylgalactosaminide alpha-2,6-sialyltransferase 6	Multiple_Complex
TC0700008882.hg.1	5.14	6.99	-3.6	3.67e-14	1.46e-12	ST7; ST7-OT4; ST7-OT3; MIR6132	suppression of tumorigenicity 7; ST7 overlapping transcript 4; ST7 overlapping transcript 3; microRNA 6132	Multiple_Complex
TC1200012775.hg.1	5	6.66	-3.15	2.53e-07	3.44e-06	ST8SIA1	ST8 alpha-N-acetyl-neuraminide alpha-2,8-sialyltransferase 1	Multiple_Complex
TC0500011579.hg.1	5.57	6.99	-2.68	6.21e-10	1.34e-08	ST8SIA4	ST8 alpha-N-acetyl-neuraminide alpha-2,8-sialyltransferase 4	Multiple_Complex
TC1000009927.hg.1	4.64	6.72	-4.25	2.29e-13	8.06e-12	ST8SIA6	ST8 alpha-N-acetyl-neuraminide alpha-2,8-sialyltransferase 6	Multiple_Complex
TC0400007713.hg.1	4.61	3.48	2.18	4.67e-07	5.99e-06	STAP1	signal transducing adaptor family member 1	Coding
TC1900009333.hg.1	4.85	3.51	2.52	6.52e-13	2.15e-11	STAP2	signal transducing adaptor family member 2	Multiple_Complex
TC1500007038.hg.1	6.62	8.78	-4.48	3.18e-17	1.87e-15	STARD9	StAR-related lipid transfer domain containing 9	Multiple_Complex
TC0200015242.hg.1	14.99	13.35	3.11	8.89e-10	1.86e-08	STAT1	signal transducer and activator of transcription 1	Multiple_Complex
TC0200015246.hg.1	10.52	11.91	-2.62	5.12e-07	6.5e-06	STAT4	signal transducer and activator of transcription 4	Multiple_Complex
TC0500012818.hg.1	13.74	15.09	-2.57	2.62e-08	4.24e-07	STK10	serine/threonine kinase 10	Multiple_Complex
TC0800011216.hg.1	5.97	7.09	-2.18	8.08e-06	7.65e-05	STK3	serine/threonine kinase 3	Multiple_Complex
TC0200010806.hg.1	4.9	5.98	-2.11	3.51e-07	4.64e-06	STK36	serine/threonine kinase 36	Multiple_Complex
TC0600011661.hg.1	12.43	13.43	-2	3.3e-09	6.25e-08	STK38	serine/threonine kinase 38	Multiple_Complex
TC0200014834.hg.1	10.8	12.72	-3.78	5.09e-23	6.78e-21	STK39	serine threonine kinase 39	Multiple_Complex
TC0100013369.hg.1	10.6	8.94	3.15	5.06e-12	1.49e-10	STMN1; MIR3917	stathmin 1; microRNA 3917	Multiple_Complex
TC0900011404.hg.1	7.97	11.23	-9.54	3.73e-22	4.49e-20	STOM	stomatin	Multiple_Complex
TC2000009947.hg.1	9.04	10.09	-2.07	1.47e-05	0.0001	STX16-NPEPL1	STX16-NPEPL1 readthrough (NMD candidate)	Multiple_Complex
TC1600010000.hg.1	5.29	4.04	2.38	1.78e-09	3.53e-08	STX1B	syntaxin 1B	Multiple_Complex
TC1600011387.hg.1	7.7	8.84	-2.2	4.24e-06	4.34e-05	STX4	syntaxin 4	Multiple_Complex
TC0900008811.hg.1	8.4	6.63	3.42	3.05e-11	7.99e-10	STXBP1	syntaxin binding protein 1	Multiple_Complex
TC1900010037.hg.1	6.71	7.75	-2.05	0.0001	0.0008	SUGP2	SURP and G-patch domain containing 2	Multiple_Complex
TC1600011372.hg.1	9.26	10.36	-2.14	1.21e-06	1.42e-05	SULT1A4; SULT1A3	sulfotransferase family 1A member 4; sulfotransferase family 1A member 3	Multiple_Complex
TC0600011927.hg.1	11.67	10.03	3.11	1.74e-12	5.44e-11	SUPT3H	SPT3 homolog, SAGA and STAGA complex component	Multiple_Complex
TSUnmapped00000645.hg.1	12.47	11.44	2.04	6.38e-11	1.59e-09	SURF2	surfeit 2 [Source:HGNC Symbol;Acc:HGNC:11475]	Coding
TC0900011842.hg.1	6.53	7.72	-2.28	1.05e-06	1.24e-05	SURF4	surfeit 4	Multiple_Complex
TC0900011220.hg.1	6.21	8.17	-3.9	1.59e-14	6.63e-13	SUSD1	sushi domain containing 1	Multiple_Complex
TC0900007976.hg.1	10.43	8.86	2.97	5.51e-09	1.01e-07	SUSD3	sushi domain containing 3	Coding
TC0100017446.hg.1	5.75	4.69	2.08	1.04e-06	1.23e-05	SUSD4	sushi domain containing 4	Multiple_Complex
TC1100010349.hg.1	11.53	10.09	2.71	3.79e-14	1.5e-12	SVIP	small VCP/p97-interacting protein	Multiple_Complex
TC1200011710.hg.1	5.16	6.22	-2.08	0.0001	0.0008	SYCP3	synaptonemal complex protein 3	Multiple_Complex
TC0100014772.hg.1	6.32	4.73	3.01	4.44e-12	1.32e-10	SYDE2	synapse defective 1, Rho GTPase, homolog 2 (C. elegans)	Multiple_Complex
TC1900010957.hg.1	13.05	14.19	-2.21	9.87e-09	1.73e-07	SYMPK	symplekin	Multiple_Complex
TC0600013588.hg.1	5.03	8.13	-8.61	4.51e-21	4.72e-19	SYNE1	spectrin repeat containing, nuclear envelope 1	Multiple_Complex
TC0600013589.hg.1	5.78	6.88	-2.14	0.0004	0.0021	SYNE1	Memczak2013 ALT_ACCEPTOR, ALT_DONOR, coding, INTERNAL, intronic best transcript NM_033071	NonCoding
TC1500010796.hg.1	4.31	7.47	-8.95	4.89e-14	1.9e-12	SYNM	synemin, intermediate filament protein	Multiple_Complex
TC0700012180.hg.1	7.29	5.43	3.63	9.52e-16	4.72e-14	SYPL1	synaptophysin-like 1	Multiple_Complex
TC2000009923.hg.1	9.93	8.83	2.15	4.35e-07	5.62e-06	SYS1	Sys1 golgi trafficking protein	Multiple_Complex
TC0100010140.hg.1	8.62	10.5	-3.67	6.18e-19	4.54e-17	SYT11	synaptotagmin XI	Coding
TC0100007510.hg.1	6.59	7.7	-2.16	1.02e-07	1.51e-06	SYTL1	synaptotagmin like 1	Multiple_Complex
TC1100011833.hg.1	10.23	11.69	-2.75	4.38e-13	1.49e-11	SYTL2	synaptotagmin-like 2	Multiple_Complex
TC0600010021.hg.1	9.51	11.65	-4.39	4.12e-18	2.72e-16	SYTL3	synaptotagmin-like 3	Multiple_Complex
TC1100013186.hg.1	10.01	11.29	-2.43	9.51e-08	1.4e-06	SYVN1	synovial apoptosis inhibitor 1, synoviolin	Multiple_Complex
TC0200008556.hg.1	11.21	12.24	-2.05	1.61e-07	2.28e-06	ZAP70	zeta chain of T cell receptor associated protein kinase 70kDa	Multiple_Complex
TC2000009602.hg.1	4.93	7.39	-5.51	9.12e-18	5.71e-16	ZBP1	Z-DNA binding protein 1	Multiple_Complex
TC0800008062.hg.1	7.06	5.75	2.49	2.47e-05	0.0002	ZBTB10	zinc finger and BTB domain containing 10	Coding
TC0100012211.hg.1	6.86	5.46	2.63	7e-14	2.66e-12	ZBTB18	zinc finger and BTB domain containing 18	Multiple_Complex
TC0300012048.hg.1	12.17	13.21	-2.04	0.0003	0.0018	ZBTB20; MIR568	zinc finger and BTB domain containing 20; microRNA 568	Multiple_Complex
TC0100010664.hg.1	6.8	7.83	-2.04	2.08e-05	0.0002	ZBTB37	zinc finger and BTB domain containing 37	Multiple_Complex
TC0300008999.hg.1	8.81	12.74	-15.21	9.34e-31	2.99e-28	ZBTB38	zinc finger and BTB domain containing 38	Multiple_Complex
TC1900009320.hg.1	6.42	7.54	-2.16	4.89e-08	7.58e-07	ZBTB7A	zinc finger and BTB domain containing 7A	Multiple_Complex
TC0100010104.hg.1	6.8	8.13	-2.52	1.18e-09	2.44e-08	ZBTB7B	zinc finger and BTB domain containing 7B	Multiple_Complex
TC0600013519.hg.1	11.71	8.87	7.17	3.53e-22	4.3e-20	ZC3H12D	zinc finger CCCH-type containing 12D	Multiple_Complex
TC0X00009890.hg.1	10.49	8.89	3.05	3.64e-09	6.85e-08	ZC4H2	zinc finger, C4H2 domain containing	Multiple_Complex
TC1600011168.hg.1	8.72	7.71	2.01	8.65e-10	1.82e-08	ZCCHC14	zinc finger, CCHC domain containing 14	Multiple_Complex
TC0900010624.hg.1	8.37	9.5	-2.19	2.94e-09	5.6e-08	ZCCHC6	zinc finger, CCHC domain containing 6	Multiple_Complex
TC0200010572.hg.1	8.09	6.85	2.35	1.66e-11	4.52e-10	ZDBF2	zinc finger, DBF-type containing 2	Multiple_Complex
TC0600009980.hg.1	5.17	6.46	-2.44	7.78e-10	1.64e-08	ZDHHC14	zinc finger, DHHC-type containing 14	Multiple_Complex
TC0100007484.hg.1	9.03	10.08	-2.07	1.06e-06	1.26e-05	ZDHHC18	zinc finger, DHHC-type containing 18	Multiple_Complex
TC0900009579.hg.1	7.35	8.48	-2.2	1.09e-08	1.91e-07	ZDHHC21	zinc finger, DHHC-type containing 21	Multiple_Complex
TC1000007199.hg.1	12.24	10.3	3.84	1.77e-06	1.99e-05	ZEB1	zinc finger E-box binding homeobox 1	Multiple_Complex
TC0200014512.hg.1	5.66	12.78	-139.95	1.92e-39	2.06e-36	ZEB2	zinc finger E-box binding homeobox 2	Multiple_Complex
TC0800012435.hg.1	10.54	9.27	2.42	1.91e-06	2.14e-05	ZFAND1	zinc finger, AN1-type domain 1	Multiple_Complex
TC0100008308.hg.1	6.22	4.79	2.69	1.23e-08	2.11e-07	ZFYVE9	zinc finger, FYVE domain containing 9	Multiple_Complex
TC1900009001.hg.1	7.54	4.84	6.51	1.55e-11	4.28e-10	ZIK1	zinc finger protein interacting with K protein 1	Multiple_Complex
TC1000006434.hg.1	9.23	10.39	-2.24	3.2e-07	4.27e-06	ZMYND11	zinc finger, MYND-type containing 11	Multiple_Complex
TC1900007447.hg.1	11.34	8.9	5.44	3.73e-19	2.84e-17	ZNF101	zinc finger protein 101	Multiple_Complex
TC1900009022.hg.1	5.73	3.65	4.23	8.64e-16	4.31e-14	ZNF135	zinc finger protein 135	Multiple_Complex
TC1900010078.hg.1	7.66	6.53	2.19	0.0007	0.0039	ZNF14	zinc finger protein 14	Multiple_Complex
TC0200015739.hg.1	7.96	9.18	-2.34	8.36e-09	1.49e-07	ZNF142	zinc finger protein 142	Multiple_Complex
TC1900011581.hg.1	6.24	5.03	2.31	1.81e-12	5.64e-11	ZNF154	zinc finger protein 154	Multiple_Complex
TC1600011562.hg.1	9.43	10.44	-2.01	6.82e-06	6.58e-05	ZNF19	zinc finger protein 19	Multiple_Complex
TC1900011752.hg.1	7.26	5.7	2.96	1.85e-10	4.33e-09	ZNF223	zinc finger protein 223	Multiple_Complex
TC1900011594.hg.1	6.15	5.09	2.08	2.97e-05	0.0002	ZNF256	zinc finger protein 256	Coding
TC1900012025.hg.1	6.12	7.26	-2.21	1.02e-05	9.46e-05	ZNF28	zinc finger protein 28	Multiple_Complex
TC1900011606.hg.1	7.19	5.95	2.36	7.85e-12	2.25e-10	ZNF329	zinc finger protein 329	Multiple_Complex
TC2000009253.hg.1	8.65	10.14	-2.79	5.71e-09	1.04e-07	ZNF335	zinc finger protein 335	Multiple_Complex
TC1000007776.hg.1	4.41	6.7	-4.9	9.24e-18	5.76e-16	ZNF365	zinc finger protein 365	Multiple_Complex
TC0600014086.hg.1	5.53	4.41	2.17	2.12e-06	2.34e-05	ZNF391	zinc finger protein 391	Multiple_Complex
TC1900008967.hg.1	7.76	6.37	2.61	9.94e-06	9.23e-05	ZNF470	zinc finger protein 470	Multiple_Complex
TC1800009086.hg.1	4.9	3.65	2.38	6.44e-12	1.87e-10	ZNF516	zinc finger protein 516	Multiple_Complex
TC1800007440.hg.1	3.96	5.7	-3.35	1.73e-08	2.89e-07	ZNF532	zinc finger protein 532	Multiple_Complex
TC1900009729.hg.1	7.11	5.19	3.77	1.44e-14	6.06e-13	ZNF563	zinc finger protein 563	Multiple_Complex
TC1900011806.hg.1	9.19	8.09	2.13	0.0002	0.0013	ZNF582-AS1	ZNF582 antisense RNA 1 (head to head)	NonCoding
TC1900012024.hg.1	6.5	8.76	-4.82	2.78e-14	1.13e-12	ZNF600	zinc finger protein 600	Multiple_Complex
TC1900011312.hg.1	13.21	15.29	-4.22	5.21e-18	3.39e-16	ZNF611	zinc finger protein 611	Multiple_Complex
TC1900011524.hg.1	5.96	4.56	2.62	5.12e-10	1.13e-08	ZNF667	zinc finger protein 667	Multiple_Complex
TC1900010221.hg.1	9.94	8.78	2.23	4.04e-07	5.25e-06	ZNF681	zinc finger protein 681	Multiple_Complex
TC0100013384.hg.1	5.35	8.28	-7.61	3.2e-12	9.66e-11	ZNF683	zinc finger protein 683	Coding
TC1900011952.hg.1	11.21	10.18	2.04	2.18e-07	3.01e-06	ZNF780A	zinc finger protein 780A	Multiple_Complex
TC0900008804.hg.1	8.45	9.71	-2.4	1.62e-11	4.44e-10	ZNF79	zinc finger protein 79	Multiple_Complex
TC0300012047.hg.1	6.88	9.03	-4.43	4.32e-11	1.11e-09	ZNF80	zinc finger protein 80	Coding
TC1900011793.hg.1	11.43	13.07	-3.1	4e-15	1.85e-13	ZNF808; RPL39P34	zinc finger protein 808; ribosomal protein L39 pseudogene 34	Multiple_Complex
TC1900012057.hg.1	7.93	6.3	3.1	1.25e-18	9e-17	ZNF814	zinc finger protein 814	Multiple_Complex
TC1600010798.hg.1	5.2	6.39	-2.28	7.49e-07	9.14e-06	ZNF821	zinc finger protein 821	Multiple_Complex
TC1900011305.hg.1	7.29	8.41	-2.17	7.62e-07	9.27e-06	ZNF83	zinc finger protein 83	Multiple_Complex
TC2000007928.hg.1	7.12	8.23	-2.16	2.47e-09	4.76e-08	ZNF831	zinc finger protein 831	Coding
TC1900007061.hg.1	7.84	5.99	3.6	5.92e-11	1.48e-09	ZNF844	zinc finger protein 844	Coding
TC1900011605.hg.1	5.43	3.88	2.93	1.77e-13	6.3e-12	ZSCAN18	zinc finger and SCAN domain containing 18	Multiple_Complex
TC0600007410.hg.1	4.78	5.86	-2.12	5.23e-07	6.62e-06	ZSCAN9	zinc finger and SCAN domain containing 9	Multiple_Complex
TC2000007507.hg.1	8.74	6.54	4.61	6.17e-25	1.01e-22	ZSWIM1	zinc finger, SWIM-type containing 1	Multiple_Complex
TC1700009877.hg.1	9.85	8.35	2.83	4.62e-12	1.37e-10	ZSWIM7	zinc finger, SWIM-type containing 7	Multiple_Complex
TC0800007351.hg.1	8.48	9.54	-2.09	2.86e-06	3.06e-05	TACC1	transforming, acidic coiled-coil containing protein 1	Multiple_Complex
TC0200006665.hg.1	5.38	6.46	-2.12	2.27e-05	0.0002	TAF1B	TATA box binding protein (TBP)-associated factor, RNA polymerase I, B, 63kDa	Multiple_Complex
TC1800006937.hg.1	7.79	5.32	5.55	8.62e-15	3.77e-13	TAF4B	TAF4b RNA polymerase II, TATA box binding protein (TBP)-associated factor, 105kDa	Multiple_Complex
TC0X00010136.hg.1	11.35	10.18	2.25	6.69e-09	1.21e-07	TAF9B	TAF9B RNA polymerase II, TATA box binding protein (TBP)-associated factor, 31kDa	Multiple_Complex
TC1100009169.hg.1	4.8	5.96	-2.23	1.52e-07	2.17e-06	TAGLN	transgelin	Multiple_Complex
TC0200009806.hg.1	10.45	11.79	-2.54	1.54e-09	3.08e-08	TANK	TRAF family member-associated NFKB activator	Multiple_Complex
TC0400010132.hg.1	11.14	10.1	2.04	3.32e-07	4.41e-06	TAPT1	transmembrane anterior posterior transformation 1	Multiple_Complex
TC0800011710.hg.1	8.64	7.44	2.29	1.32e-09	2.7e-08	TATDN1; MIR6844	TatD DNase domain containing 1; microRNA 6844	Multiple_Complex
TC1200008184.hg.1	9.54	8.26	2.43	0.0002	0.0011	TBC1D15	TBC1 domain family, member 15	Multiple_Complex
TC0400007128.hg.1	7.61	9.26	-3.13	5.16e-08	7.95e-07	TBC1D19	TBC1 domain family, member 19	Multiple_Complex
TC2000008130.hg.1	9.11	10.14	-2.05	2.67e-08	4.32e-07	TBC1D20	TBC1 domain family, member 20	Multiple_Complex
TC1600011329.hg.1	7.57	8.58	-2.02	0.0004	0.0025	TBC1D24	TBC1 domain family, member 24	Multiple_Complex
TC0X00007194.hg.1	9.55	10.6	-2.08	3.93e-06	4.06e-05	TBC1D25	TBC1 domain family, member 25	Multiple_Complex
TC1500010128.hg.1	10.51	12.24	-3.32	4.09e-08	6.43e-07	TBC1D2B	TBC1 domain family, member 2B	Multiple_Complex
TC0800008726.hg.1	7.62	8.75	-2.2	6.72e-07	8.33e-06	TBC1D31	TBC1 domain family, member 31	Multiple_Complex
TC1300009271.hg.1	10.25	7.43	7.05	3.61e-22	4.38e-20	TBC1D4	TBC1 domain family, member 4	Multiple_Complex
TC1900007906.hg.1	10.54	11.55	-2.02	1.96e-07	2.72e-06	TBCB	tubulin folding cofactor B	Multiple_Complex
TC1700009277.hg.1	7.81	9.62	-3.5	4.35e-06	4.44e-05	TBCD	tubulin folding cofactor D	Multiple_Complex
TC1200008003.hg.1	7.36	9.39	-4.08	4.15e-14	1.63e-12	TBK1	TANK-binding kinase 1	Multiple_Complex
TC1700008134.hg.1	4.79	6.6	-3.5	1.36e-12	4.31e-11	TBKBP1	TBK1 binding protein 1	Coding
TC1100009395.hg.1	11.53	12.62	-2.13	0.0002	0.001	TBRG1	transforming growth factor beta regulator 1	Multiple_Complex
TC0700010947.hg.1	9.81	8.46	2.55	3e-11	7.87e-10	TBRG4; SNORA5B	transforming growth factor beta regulator 4; small nucleolar RNA, H/ACA box 5B	Multiple_Complex
TC1700008135.hg.1	4.92	7.24	-4.99	4.54e-29	1.16e-26	TBX21	T-box 21	Multiple_Complex
TC1900009297.hg.1	6.38	4.6	3.43	1.56e-14	6.52e-13	TBXA2R	thromboxane A2 receptor	Multiple_Complex
TC1400010777.hg.1	10.56	11.66	-2.15	5.5e-07	6.94e-06	TC2N	tandem C2 domains, nuclear	Multiple_Complex
TC2000008107.hg.1	8.86	7.61	2.38	1.53e-12	4.84e-11	TCEA2	transcription elongation factor A (SII), 2	Multiple_Complex
TC0100013278.hg.1	11.12	4.68	87	3.3e-36	2.02e-33	TCEA3	transcription elongation factor A (SII), 3	Multiple_Complex
TC0X00011317.hg.1	8.7	7.4	2.47	4.6e-10	1.02e-08	TCEAL1	transcription elongation factor A (SII)-like 1	Multiple_Complex
TC0X00007965.hg.1	5.88	4.21	3.19	2.29e-14	9.44e-13	TCEAL2	transcription elongation factor A (SII)-like 2	Multiple_Complex
TC0X00011315.hg.1	8.6	7.17	2.7	1.04e-13	3.84e-12	TCEAL3	transcription elongation factor A (SII)-like 3	Coding
TC0X00010406.hg.1	7.99	6.62	2.58	3.21e-12	9.67e-11	TCEAL8	transcription elongation factor A (SII)-like 8	Multiple_Complex
TC1600011451.hg.1	10.53	11.9	-2.58	3.74e-10	8.42e-09	TCF25	transcription factor 25 (basic helix-loop-helix)	Multiple_Complex
TC0500008684.hg.1	11.03	8.44	6.02	1.33e-29	3.81e-27	TCF7	transcription factor 7 (T-cell specific, HMG-box)	Multiple_Complex
TC1200012704.hg.1	5.95	7.43	-2.79	8.52e-07	1.03e-05	TCHP	trichoplein, keratin filament binding	Multiple_Complex
TC1100013057.hg.1	10.95	12.8	-3.6	1.54e-14	6.48e-13	TCIRG1	T-cell, immune regulator 1, ATPase, H+ transporting, lysosomal V0 subunit A3	Multiple_Complex
TC1200008726.hg.1	11.09	9.85	2.37	1e-10	2.45e-09	TCP11L2	t-complex 11, testis-specific-like 2	Multiple_Complex
TC0300014094.hg.1	9.42	10.51	-2.13	1.4e-05	0.0001	TCTEX1D2	Tctex1 domain containing 2	Multiple_Complex
TC1400008588.hg.1	8.9	10.53	-3.1	5.36e-10	1.17e-08	TEP1	telomerase-associated protein 1	Multiple_Complex
TC1200012080.hg.1	4.56	5.59	-2.04	1.98e-07	2.75e-06	TESC	tescalcin	Multiple_Complex
TC0900007085.hg.1	12.05	13.72	-3.17	4.73e-12	1.4e-10	TESK1; MIR4667	testis-specific kinase 1; microRNA 4667	Multiple_Complex
TC1200010850.hg.1	12.15	9.02	8.73	9.39e-26	1.68e-23	TESPA1	thymocyte expressed, positive selection associated 1	Multiple_Complex
TC0300012654.hg.1	9.57	10.8	-2.35	3.51e-09	6.61e-08	TFDP2	transcription factor Dp-2 (E2F dimerization partner 2)	Multiple_Complex
TC1900010743.hg.1	8.49	9.9	-2.66	2.67e-07	3.61e-06	TGFB1	transforming growth factor beta 1	Multiple_Complex
TC0900008202.hg.1	6.39	8.45	-4.19	1.62e-12	5.12e-11	TGFBR1	transforming growth factor, beta receptor 1	Multiple_Complex
TC0100014910.hg.1	8.56	14.27	-52.36	1.39e-40	1.86e-37	TGFBR3	transforming growth factor beta receptor III	Multiple_Complex
TC0400007876.hg.1	7.2	8.38	-2.27	4.69e-05	0.0004	THAP6	THAP domain containing 6	Multiple_Complex
TC1500006925.hg.1	7.52	9.65	-4.36	0.0002	0.0013	THBS1	thrombospondin 1	Multiple_Complex
TC0100015817.hg.1	10.49	8.72	3.41	4.02e-10	8.98e-09	THEM4	thioesterase superfamily member 4	Multiple_Complex
TC0500009223.hg.1	7.65	6.42	2.33	2.49e-08	4.04e-07	THG1L	tRNA-histidine guanylyltransferase 1-like	Multiple_Complex
TC1700010230.hg.1	6.37	8.11	-3.33	7.67e-14	2.89e-12	TIAF1; MYO18A	TGFB1-induced anti-apoptotic factor 1; myosin XVIIIA	Multiple_Complex
TC0300008385.hg.1	6.73	11.31	-23.8	2.78e-21	2.99e-19	TIGIT	T-cell immunoreceptor with Ig and ITIM domains	Multiple_Complex
TC1900011840.hg.1	9.32	8.17	2.22	2.22e-06	2.44e-05	TIMM13	translocase of inner mitochondrial membrane 13 homolog (yeast)	Coding
TC1400009315.hg.1	10.02	8.51	2.83	3.96e-14	1.56e-12	TIMM9	translocase of inner mitochondrial membrane 9 homolog (yeast)	Multiple_Complex
TC0400012921.hg.1	4.77	5.94	-2.25	0.0011	0.0053	TLR1	toll-like receptor 1	Multiple_Complex
TC0400009543.hg.1	4.72	6.56	-3.59	3.87e-10	8.67e-09	TLR3	toll-like receptor 3	Multiple_Complex
TC0400012922.hg.1	4.13	5.51	-2.6	2.68e-05	0.0002	TLR6	toll-like receptor 6	Multiple_Complex
TC0300014095.hg.1	4.84	5.94	-2.14	2.25e-05	0.0002	TM4SF19	transmembrane 4 L six family member 19	Multiple_Complex
TC0300014092.hg.1	5.25	6.58	-2.52	2.1e-08	3.45e-07	TM4SF19-TCTEX1D2	TM4SF19-TCTEX1D2 readthrough (NMD candidate)	Multiple_Complex
TC1500008114.hg.1	4.63	5.67	-2.05	1.47e-05	0.0001	TM6SF1	transmembrane 6 superfamily member 1	Multiple_Complex
TC1700009036.hg.1	5.81	7.33	-2.87	3.73e-07	4.91e-06	TMC8	transmembrane channel like 8	Multiple_Complex
TC1200011567.hg.1	4.05	7.51	-11.05	4.82e-18	3.15e-16	TMCC3; MIR7844	transmembrane and coiled-coil domain family 3; microRNA 7844	Multiple_Complex
TC1900009648.hg.1	7.21	8.32	-2.16	1.84e-07	2.57e-06	TMED1	transmembrane p24 trafficking protein 1	Multiple_Complex
TC1100007785.hg.1	10.94	12.54	-3.03	3.49e-08	5.54e-07	TMEM109	transmembrane protein 109	Multiple_Complex
TC0300013997.hg.1	6.47	7.61	-2.2	4.74e-09	8.77e-08	TMEM110	transmembrane protein 110	Multiple_Complex
TC1100012121.hg.1	16.82	15.54	2.43	6.82e-09	1.23e-07	TMEM123	transmembrane protein 123	Multiple_Complex
TC0400009855.hg.1	9.59	8.58	2.02	1.93e-05	0.0002	TMEM128	transmembrane protein 128	Multiple_Complex
TC0600014068.hg.1	10.42	8.28	4.42	5.05e-14	1.96e-12	TMEM14C	transmembrane protein 14C	Multiple_Complex
TC0400012150.hg.1	6.57	5.31	2.39	0.0001	0.0008	TMEM154	transmembrane protein 154	Multiple_Complex
TC0400007559.hg.1	8.62	9.9	-2.43	9.87e-05	0.0007	TMEM165	transmembrane protein 165	Multiple_Complex
TC0500011334.hg.1	6.11	7.3	-2.27	0.0016	0.0072	TMEM167A	Transcript Identified by AceView, Entrez Gene ID(s) 153339	Unassigned
TC0600010017.hg.1	7.5	9.41	-3.78	4.46e-21	4.71e-19	TMEM181	transmembrane protein 181	Multiple_Complex
TC2200008687.hg.1	5.57	7.22	-3.14	7.83e-06	7.44e-05	TMEM184B	transmembrane protein 184B	Multiple_Complex
TC2200006552.hg.1	5.21	6.24	-2.05	1.98e-06	2.21e-05	TMEM191B	transmembrane protein 191B	Multiple_Complex
TC0900010386.hg.1	8.88	11.13	-4.74	6.01e-15	2.72e-13	TMEM2	transmembrane protein 2	Multiple_Complex
TC0900010388.hg.1	4.9	6.33	-2.69	2.19e-05	0.0002	TMEM2	Transcript Identified by AceView, Entrez Gene ID(s) 23670	Unassigned
TC0900010387.hg.1	4.79	5.89	-2.14	2.84e-05	0.0002	TMEM2	Transcript Identified by AceView, Entrez Gene ID(s) 23670	Unassigned
TC1600006550.hg.1	10.3	6.7	12.11	2.57e-28	5.87e-26	TMEM204	transmembrane protein 204	Coding
TC1700009750.hg.1	8.27	5.43	7.15	1.48e-29	4.06e-27	TMEM220	transmembrane protein 220	Multiple_Complex
TC0700011698.hg.1	12.95	11.7	2.38	4.3e-12	1.28e-10	TMEM243	transmembrane protein 243, mitochondrial	Multiple_Complex
TC0X00010670.hg.1	5.18	7.39	-4.62	4.98e-17	2.85e-15	TMEM255A	transmembrane protein 255A	Multiple_Complex
TC1900009128.hg.1	11.58	12.71	-2.19	0.0002	0.0015	TMEM259	transmembrane protein 259	Multiple_Complex
TC0900009513.hg.1	11.14	9.5	3.11	1.59e-14	6.62e-13	TMEM261	transmembrane protein 261	Multiple_Complex
TC0900008318.hg.1	9.02	7.66	2.56	4.95e-07	6.31e-06	TMEM38B	transmembrane protein 38B	Multiple_Complex
TC0300012118.hg.1	8.32	9.49	-2.25	1.23e-06	1.43e-05	TMEM39A	transmembrane protein 39A	Multiple_Complex
TC0300013793.hg.1	9.21	10.35	-2.21	6.97e-12	2.02e-10	TMEM43	transmembrane protein 43	Multiple_Complex
TC1500010726.hg.1	4.69	5.92	-2.35	4.45e-07	5.74e-06	TMEM62	transmembrane protein 62	Multiple_Complex
TC1100006485.hg.1	9.07	10.25	-2.26	2.5e-05	0.0002	TMEM80	transmembrane protein 80	Multiple_Complex
TC1700008907.hg.1	5.26	6.43	-2.26	1.73e-09	3.43e-08	TMEM94; MIR6785	transmembrane protein 94; microRNA 6785	Multiple_Complex
TC1900009330.hg.1	8.94	6.93	4.02	1.24e-18	8.93e-17	TMIGD2	transmembrane and immunoglobulin domain containing 2	Coding
TC2000008345.hg.1	7.79	8.83	-2.06	3.13e-10	7.13e-09	TMX4	thioredoxin-related transmembrane protein 4	Multiple_Complex
TC0600009597.hg.1	14.97	16.79	-3.51	1.21e-14	5.15e-13	TNFAIP3	tumor necrosis factor, alpha-induced protein 3	Multiple_Complex
TC0500008437.hg.1	9.77	8.48	2.46	1.04e-05	9.59e-05	TNFAIP8	tumor necrosis factor, alpha-induced protein 8	Multiple_Complex
TC0800009875.hg.1	8.39	7.05	2.53	4.59e-11	1.17e-09	TNFRSF10A	tumor necrosis factor receptor superfamily, member 10a	Multiple_Complex
TC0800009872.hg.1	8.37	5.36	8.07	1.37e-17	8.35e-16	TNFRSF10D	tumor necrosis factor receptor superfamily, member 10d, decoy with truncated death domain	Coding
TC0100006881.hg.1	9.28	13.1	-14.07	4.11e-20	3.8e-18	TNFRSF1B; MIR4632; MIR7846	tumor necrosis factor receptor superfamily, member 1B; microRNA 4632; microRNA 7846	Multiple_Complex
TC0100018398.hg.1	11.01	8.46	5.85	2.05e-17	1.23e-15	TNFRSF25	tumor necrosis factor receptor superfamily, member 25	Multiple_Complex
TC0100012734.hg.1	7.45	10.42	-7.86	1.8e-08	3e-07	TNFRSF9	tumor necrosis factor receptor superfamily, member 9	Coding
TC1300010000.hg.1	7.71	6.25	2.75	1.77e-05	0.0002	TNFSF13B	tumor necrosis factor (ligand) superfamily, member 13b	Multiple_Complex
TC1900009442.hg.1	6.41	9.76	-10.18	1.85e-27	3.71e-25	TNFSF14	tumor necrosis factor (ligand) superfamily, member 14	Multiple_Complex
TC0900011302.hg.1	11.97	9.65	5.01	4.58e-13	1.55e-11	TNFSF8	tumor necrosis factor (ligand) superfamily, member 8	Multiple_Complex
TC0300013108.hg.1	8.68	10.09	-2.65	3.25e-06	3.42e-05	TNIK	TRAF2 and NCK interacting kinase	Multiple_Complex
TC0400011735.hg.1	4.35	6.05	-3.23	1.22e-08	2.11e-07	TNIP3	TNFAIP3 interacting protein 3	Multiple_Complex
TC0300011172.hg.1	8.57	6.68	3.72	1.05e-13	3.89e-12	TNNC1	troponin C type 1 (slow)	Multiple_Complex
TC0100017815.hg.1	14.65	13.53	2.17	4.91e-12	1.45e-10	TOMM20	translocase of outer mitochondrial membrane 20 homolog (yeast)	Multiple_Complex
TC2200008112.hg.1	9.36	10.85	-2.81	6.47e-07	8.04e-06	TOP3B	topoisomerase (DNA) III beta	Multiple_Complex
TC0300012475.hg.1	7.28	8.28	-2.01	0.0001	0.0008	TOPBP1	topoisomerase (DNA) II binding protein 1	Multiple_Complex
TC0800010558.hg.1	5.28	10.7	-42.81	2.87e-42	4.4e-39	TOX	thymocyte selection-associated high mobility group box	Multiple_Complex
TC1100010639.hg.1	7.61	9.23	-3.06	8.53e-14	3.19e-12	TP53I11	tumor protein p53 inducible protein 11	Multiple_Complex
TC1700007425.hg.1	5.02	6.07	-2.07	1.59e-07	2.26e-06	TP53I13	tumor protein p53 inducible protein 13	Multiple_Complex
TC0800011150.hg.1	6.19	7.27	-2.12	8.94e-09	1.58e-07	TP53INP1	tumor protein p53 inducible nuclear protein 1	Multiple_Complex
TC1200008933.hg.1	10.1	9	2.13	4.14e-06	4.25e-05	TPCN1	two pore segment channel 1	Multiple_Complex
TC0900009949.hg.1	6.56	8.31	-3.37	3.06e-06	3.25e-05	TPM2	tropomyosin 2 (beta)	Multiple_Complex
TC0100015899.hg.1	17.02	18.06	-2.05	3.16e-13	1.09e-11	TPM3	tropomyosin 3	Multiple_Complex
TC1100009981.hg.1	9.23	10.43	-2.3	1.71e-09	3.39e-08	TPP1	tripeptidyl peptidase I	Multiple_Complex
TC0300013914.hg.1	6.76	13.2	-86.78	6.35e-34	3.32e-31	TPRG1	tumor protein p63 regulated 1	NonCoding
TC0300013915.hg.1	3.86	8.77	-29.95	2.14e-29	5.67e-27	TPRG1	tumor protein p63 regulated 1	Multiple_Complex
TC2200008302.hg.1	8.5	9.59	-2.13	9.88e-13	3.19e-11	TPST2	tyrosylprotein sulfotransferase 2	Multiple_Complex
TC0200016699.hg.1	9.66	5.63	16.41	4.56e-30	1.36e-27	TRABD2A	TraB domain containing 2A	Multiple_Complex
TC0600012871.hg.1	8.22	6.69	2.91	2.02e-13	7.17e-12	TRAF3IP2	TRAF3 interacting protein 2	Multiple_Complex
TC1100010551.hg.1	8.71	10.13	-2.67	3.39e-10	7.69e-09	TRAF6	TNF receptor-associated factor 6, E3 ubiquitin protein ligase	Multiple_Complex
TC0600012040.hg.1	8.23	9.75	-2.86	5.7e-11	1.43e-09	TRAM2	translocation associated membrane protein 2	Multiple_Complex
TC2100007336.hg.1	8.5	9.82	-2.5	4.15e-09	7.74e-08	TRAPPC10	trafficking protein particle complex 10	Multiple_Complex
TC0400009467.hg.1	9.23	10.28	-2.06	0.0007	0.0035	TRAPPC11	trafficking protein particle complex 11	Multiple_Complex
TC1900011658.hg.1	10.2	9.17	2.04	3.32e-05	0.0003	TRAPPC5	trafficking protein particle complex 5	Multiple_Complex
TC0600011823.hg.1	9.06	11.1	-4.09	1.72e-16	9.32e-15	TRERF1	transcriptional regulating factor 1	Multiple_Complex
TC0700013538.hg.1	9.39	14.18	-27.72	4.37e-29	1.13e-26	TRGJ1; TRGC2; TRGJ2; TRGV9; TRGC1; TRGJP; TRGJP2	T cell receptor gamma joining 1; T cell receptor gamma constant 2; T cell receptor gamma joining 2; T cell receptor gamma variable 9; T cell receptor gamma constant 1; T cell receptor gamma joining P; T cell receptor gamma joining P2	Multiple_Complex
TC1300007187.hg.1	9.2	10.5	-2.46	6.41e-10	1.38e-08	TRIM13; KCNRG	tripartite motif containing 13; potassium channel regulator	Multiple_Complex
TC0600011357.hg.1	6.1	7.15	-2.07	1.56e-06	1.78e-05	TRIM26	tripartite motif containing 26	Multiple_Complex
TC1100007287.hg.1	10.54	9.53	2.02	3.79e-07	4.98e-06	TRIM44	tripartite motif containing 44	Multiple_Complex
TC0300014075.hg.1	9.07	10.28	-2.31	0.0001	0.0007	TRIM59	tripartite motif containing 59	Coding
TC2200007313.hg.1	4.51	5.63	-2.17	6.19e-06	6.05e-05	TRIOBP; NOL12	TRIO and F-actin binding protein; nucleolar protein 12	Multiple_Complex
TC0300008171.hg.1	10.44	9.29	2.22	0.0012	0.0058	TRMT10C	tRNA methyltransferase 10C, mitochondrial RNase P subunit	Coding
TC2000008955.hg.1	9.37	11.14	-3.41	9.98e-15	4.31e-13	TRPC4AP	transient receptor potential cation channel, subfamily C, member 4 associated protein	Multiple_Complex
TC1300008793.hg.1	7.92	9.2	-2.43	2.26e-08	3.69e-07	TSC22D1	TSC22 domain family, member 1	Multiple_Complex
TC0300006627.hg.1	7.84	6.59	2.38	7.87e-09	1.41e-07	TSEN2	TSEN2 tRNA splicing endonuclease subunit	Multiple_Complex
TC1700012307.hg.1	6.17	7.39	-2.32	6.32e-12	1.84e-10	TSEN54	TSEN54 tRNA splicing endonuclease subunit	Multiple_Complex
TC2000007760.hg.1	7	4.05	7.72	1.03e-16	5.69e-15	TSHZ2	teashirt zinc finger homeobox 2	Coding
TC1900010334.hg.1	4.32	5.96	-3.12	1.39e-10	3.33e-09	TSHZ3	teashirt zinc finger homeobox 3	Multiple_Complex
TC0100015364.hg.1	5	7.54	-5.79	4.01e-15	1.85e-13	TSPAN2	tetraspanin 2	Multiple_Complex
TC0700009079.hg.1	6.13	5.09	2.06	1.97e-09	3.88e-08	TSPAN33	tetraspanin 33	Multiple_Complex
TC0X00010329.hg.1	6.57	4.59	3.94	1.73e-15	8.29e-14	TSPAN6	tetraspanin 6	Multiple_Complex
TC0100018207.hg.1	7.32	8.83	-2.85	2.32e-05	0.0002	TSSK3	testis-specific serine kinase 3	Coding
TC0200016746.hg.1	6.12	7.58	-2.75	6.69e-07	8.3e-06	TTC21B	tetratricopeptide repeat domain 21B	NonCoding
TC0100014275.hg.1	6.88	8.86	-3.94	3.31e-20	3.09e-18	TTC22	tetratricopeptide repeat domain 22	Multiple_Complex
TC0200008084.hg.1	6.15	7.36	-2.31	4.72e-05	0.0004	TTC31	tetratricopeptide repeat domain 31	Multiple_Complex
TC1400007584.hg.1	9.72	5.48	18.78	3.82e-24	5.76e-22	TTC9	tetratricopeptide repeat domain 9	Coding
TC0300013787.hg.1	9.48	10.81	-2.51	7.24e-09	1.3e-07	TTLL3	tubulin tyrosine ligase-like family member 3	Multiple_Complex
TC0100014743.hg.1	3.72	4.87	-2.21	0.0004	0.0023	TTLL7	tubulin tyrosine ligase-like family member 7	Multiple_Complex
TC0200016752.hg.1	8.04	6.02	4.08	2.84e-06	3.04e-05	TTN	titin	Multiple_Complex
TC1100006773.hg.1	6.06	4.97	2.12	1.3e-07	1.88e-06	TUB	tubby bipartite transcription factor	Multiple_Complex
TC0700010396.hg.1	9.89	8.85	2.06	0.0019	0.0086	TWISTNB	TWIST neighbor	Multiple_Complex
TC0400010615.hg.1	9.4	5.97	10.84	2.46e-17	1.46e-15	TXK	TXK tyrosine kinase	Multiple_Complex
TC0100015598.hg.1	13.87	12.83	2.06	5.96e-09	1.08e-07	TXNIP	thioredoxin interacting protein	Multiple_Complex
TC0300014039.hg.1	5.74	3.74	3.99	2.15e-16	1.14e-14	TXNRD3	thioredoxin reductase 3	Multiple_Complex
TC1300007824.hg.1	10.93	9.87	2.09	2.58e-10	5.94e-09	UBAC2	UBA domain containing 2	Multiple_Complex
TC1500009781.hg.1	5.28	6.63	-2.55	1.34e-06	1.55e-05	UBAP1L	ubiquitin associated protein 1 like	Multiple_Complex
TC2100007254.hg.1	14.19	12.97	2.32	6.19e-08	9.4e-07	UBASH3A	ubiquitin associated and SH3 domain containing A	Multiple_Complex
TC1100009330.hg.1	7.23	6.09	2.21	2.35e-07	3.23e-06	UBASH3B	ubiquitin associated and SH3 domain containing B	Multiple_Complex
TC0300006827.hg.1	9.38	5.9	11.15	3.62e-24	5.5e-22	UBE2E2	ubiquitin conjugating enzyme E2E 2	Multiple_Complex
TC1500008135.hg.1	7.25	8.42	-2.25	4.19e-08	6.57e-07	UBE2Q2L	ubiquitin conjugating enzyme E2Q family member 2-like	Coding
TC0600008050.hg.1	9.09	10.56	-2.75	7e-10	1.49e-08	UBR2	ubiquitin protein ligase E3 component n-recognin 2	Multiple_Complex
TC0100018315.hg.1	6.9	8.27	-2.59	2.08e-11	5.54e-10	UCK2; MIR3658	uridine-cytidine kinase 2; microRNA 3658	Multiple_Complex
TC1100010271.hg.1	4.72	6.6	-3.68	6.26e-09	1.13e-07	UEVLD	UEV and lactate/malate dehyrogenase domains	Multiple_Complex
TC1200009457.hg.1	7.77	8.94	-2.25	2.09e-05	0.0002	ULK1	unc-51 like autophagy activating kinase 1	Multiple_Complex
TC0300010821.hg.1	7.6	8.65	-2.06	2.02e-06	2.25e-05	ULK4	unc-51 like kinase 4	Multiple_Complex
TC1300008179.hg.1	10.36	11.7	-2.52	2.72e-09	5.21e-08	UPF3A	UPF3 regulator of nonsense transcripts homolog A (yeast)	Multiple_Complex
TC0700007477.hg.1	9.1	10.92	-3.51	7.35e-14	2.78e-12	UPP1	uridine phosphorylase 1	Multiple_Complex
TC0100013013.hg.1	7.92	6.82	2.14	5.75e-08	8.8e-07	UQCRHL	ubiquinol-cytochrome c reductase hinge protein like	Multiple_Complex
TC1900007313.hg.1	12.02	10.8	2.33	3.78e-10	8.5e-09	USE1	unconventional SNARE in the ER 1 homolog (S. cerevisiae)	Multiple_Complex
TC0300012027.hg.1	7.5	9.06	-2.95	1.55e-09	3.09e-08	USF3	upstream transcription factor family member 3	Multiple_Complex
TC0100014284.hg.1	9.17	10.18	-2.02	2.12e-05	0.0002	USP24	ubiquitin specific peptidase 24	Multiple_Complex
TC1100012358.hg.1	6.56	9.99	-10.79	4.83e-23	6.47e-21	USP28	ubiquitin specific peptidase 28	Multiple_Complex
TC1200011588.hg.1	7.27	4.67	6.04	9.07e-21	9.17e-19	USP44	ubiquitin specific peptidase 44	Multiple_Complex
TC1000009792.hg.1	5.24	4.23	2.01	1.19e-06	1.39e-05	USP6NL	USP6 N-terminal like	Multiple_Complex
TC1700008283.hg.1	10.83	9.77	2.08	1.77e-11	4.8e-10	UTP18	UTP18 small subunit (SSU) processome component	Multiple_Complex
TC1600008220.hg.1	10.8	9.79	2.01	1.01e-07	1.49e-06	UTP4	UTP4 small subunit (SSU) processome component	Multiple_Complex
TC0600009712.hg.1	9.83	12.19	-5.14	4.41e-19	3.32e-17	UTRN	utrophin	Multiple_Complex
TC0200013765.hg.1	9.84	7.85	3.97	1.04e-15	5.14e-14	UXS1	UDP-glucuronate decarboxylase 1	Multiple_Complex
TC0X00009582.hg.1	15.13	14.07	2.07	2.04e-11	5.47e-10	UXT	ubiquitously expressed prefoldin like chaperone	Multiple_Complex
TC0100009524.hg.1	3.72	5.85	-4.38	7.82e-17	4.43e-15	VANGL1	VANGL planar cell polarity protein 1	Multiple_Complex
TC0100015155.hg.1	5.9	7.53	-3.11	2.49e-09	4.78e-08	VAV3	vav 3 guanine nucleotide exchange factor	Multiple_Complex
TC0X00008001.hg.1	6.77	5.09	3.19	2.77e-14	1.13e-12	WBP5	WW domain binding protein 5	Coding
TC1000008056.hg.1	7.03	9.23	-4.61	2e-19	1.62e-17	VCL	vinculin	Multiple_Complex
TC1000008092.hg.1	11.75	10.68	2.11	1.11e-11	3.09e-10	VDAC2	voltage-dependent anion channel 2	Multiple_Complex
TC1000006466.hg.1	9.63	11.02	-2.63	2.73e-11	7.22e-10	WDR37	WD repeat domain 37	Multiple_Complex
TC0200007111.hg.1	10.27	8.91	2.58	1.59e-12	5.01e-11	WDR43; SNORD53	WD repeat domain 43; small nucleolar RNA, C/D box 53	Multiple_Complex
TC0100008897.hg.1	5.39	7.07	-3.21	7.33e-08	1.1e-06	WDR63	WD repeat domain 63	Multiple_Complex
TC1900007087.hg.1	7.53	8.61	-2.12	1.82e-05	0.0002	WDR83	WD repeat domain 83	Multiple_Complex
TC0100007505.hg.1	10.51	11.53	-2.03	6.16e-07	7.68e-06	WDTC1	WD and tetratricopeptide repeats 1	Multiple_Complex
TC1100006815.hg.1	4.67	8	-10.1	5.21e-26	9.55e-24	WEE1	WEE1 G2 checkpoint kinase	Multiple_Complex
TC0200014995.hg.1	13.81	15.14	-2.5	5.64e-13	1.87e-11	WIPF1	WAS/WASL interacting protein family, member 1	Multiple_Complex
TC1700011561.hg.1	5.92	8.22	-4.9	1.98e-16	1.05e-14	WIPI1	WD repeat domain, phosphoinositide interacting 1	Multiple_Complex
TC0300007161.hg.1	7.03	5.43	3.04	8.82e-13	2.86e-11	VIPR1	vasoactive intestinal peptide receptor 1	Multiple_Complex
TC0700013313.hg.1	3.96	5.04	-2.11	2.63e-07	3.56e-06	VIPR2	vasoactive intestinal peptide receptor 2	Multiple_Complex
TC0900006481.hg.1	4.95	6.75	-3.47	1.65e-11	4.51e-10	VLDLR	very low density lipoprotein receptor	Multiple_Complex
TC1200006450.hg.1	10.65	12.49	-3.57	4.15e-09	7.74e-08	WNK1	WNK lysine deficient protein kinase 1	Multiple_Complex
TC1200006454.hg.1	7.48	8.57	-2.13	1.16e-06	1.36e-05	WNK1	Transcript Identified by AceView, Entrez Gene ID(s) 378465; 65125	Unassigned
TC0600013205.hg.1	9.24	10.27	-2.05	1.59e-05	0.0001	VNN2	vanin 2	Multiple_Complex
TC1300009013.hg.1	8.05	9.34	-2.44	9.16e-12	2.6e-10	VPS36	vacuolar protein sorting 36 homolog (S. cerevisiae)	Multiple_Complex
[truncated: 16 more rows]

## Sheet: TEMvsMEM
ID	TEM Avg (log2)	MEM Avg (log2)	Fold Change	P-val	FDR P-val	Gene Symbol	Description	Group
[truncated: 303 more rows]
