# Supplementary material for: Cytotoxic CD8+ Temra cells show loss of chromatin accessibility at genes associated with T cell activation
Source: Front Immunol. 2024 Feb 2;15:1285798. doi: 10.3389/fimmu.2024.1285798 (PMC10870784; doi:10.3389/fimmu.2024.1285798)
Supplement: Supplementary Table 2 — Lists of differentially expressed genes between Tcmv and resting (Tna, Tcm/em, Temra) CD8+ T cell subsets. [file Table_2.xlsx]

## Sheet: CMVvsNEG
ID	pos Avg (log2)	neg Avg (log2)	Fold Change	P-val	FDR P-val	Gene Symbol	Description	Group
TC1500010923.hg.1	5.59	6.8	-2.31	0.0002	0.0023	DET1	de-etiolated homolog 1 (Arabidopsis)	Multiple_Complex
TC0X00010643.hg.1	13.49	14.74	-2.37	2.66e-12	3.35e-10	SEPT6	septin 6	Multiple_Complex
TC1600010752.hg.1	12.76	11.76	2	9.88e-06	0.0002	AARS	alanyl-tRNA synthetase	Multiple_Complex
TC1900006508.hg.1	6.95	9.49	-5.83	4.57e-12	5.41e-10	ABCA7	ATP binding cassette subfamily A member 7	Multiple_Complex
TC1200010413.hg.1	7.45	8.98	-2.87	4.79e-09	2.64e-07	ABCD2	ATP binding cassette subfamily D member 2	Multiple_Complex
TC0400008902.hg.1	11.41	10.4	2.02	0.0063	0.0348	ABCE1	ATP binding cassette subfamily E member 1	Multiple_Complex
TC1000011904.hg.1	13.27	15.61	-5.08	7.01e-17	2.15e-14	ABLIM1	actin binding LIM protein 1	Multiple_Complex
TC0700013401.hg.1	6.63	8.12	-2.8	5.55e-07	1.61e-05	AC007566.10; GATAD1	Transcript Identified by AceView, Entrez Gene ID(s) 57798; novel transcript, antisense to ERVW-1 and PEX1	NonCoding
TC1200008795.hg.1	5.81	7.08	-2.41	0.0002	0.0024	ACACB	acetyl-CoA carboxylase beta	Multiple_Complex
TC1700006740.hg.1	12.61	13.81	-2.3	2.1e-11	2.06e-09	ACAP1	ArfGAP with coiled-coil, ankyrin repeat and PH domains 1	Multiple_Complex
TC0300013635.hg.1	9.57	10.77	-2.29	1.32e-08	6.49e-07	ACAP2	ArfGAP with coiled-coil, ankyrin repeat and PH domains 2	Multiple_Complex
TC0X00009250.hg.1	8.27	6.65	3.08	6.34e-18	2.47e-15	ACOT9	acyl-CoA thioesterase 9	Multiple_Complex
TC1700008254.hg.1	5.53	6.98	-2.72	2.15e-05	0.0004	ACSF2	acyl-CoA synthetase family member 2	Multiple_Complex
TC2000008722.hg.1	8.28	9.29	-2.02	9.65e-06	0.0002	ACSS1	acyl-CoA synthetase short-chain family member 1	Multiple_Complex
TC0700010167.hg.1	10.75	9.74	2.02	1.94e-06	4.71e-05	ACTB	actin, beta	Multiple_Complex
TC1700012052.hg.1	15.22	14.04	2.26	6.49e-12	7.33e-10	ACTG1	actin gamma 1	Multiple_Complex
TC1900008020.hg.1	13.06	11.46	3.04	4.7e-10	3.4e-08	ACTN4	actinin, alpha 4	Multiple_Complex
TC0500012599.hg.1	8.08	5.31	6.79	4.56e-15	9.28e-13	ADAM19	ADAM metallopeptidase domain 19	Multiple_Complex
TC0700013500.hg.1	9.06	7.16	3.73	5.49e-10	3.93e-08	ADAP1	ArfGAP with dual PH domains 1	Multiple_Complex
TC1600011569.hg.1	7.05	8.32	-2.41	4.06e-05	0.0006	ADAT1	adenosine deaminase, tRNA-specific 1	Multiple_Complex
TC0200011991.hg.1	5.64	4.61	2.05	8.2e-08	3.14e-06	ADCY3	adenylate cyclase 3	Multiple_Complex
TC1000008875.hg.1	5.56	6.6	-2.06	0.0034	0.0216	ADD3	adducin 3 (gamma)	Multiple_Complex
TC1600008003.hg.1	8.78	7.42	2.56	6.28e-05	0.0009	ADGRG5	adhesion G protein-coupled receptor G5	Multiple_Complex
TC0800012308.hg.1	7.86	9.16	-2.46	1.12e-08	5.61e-07	ADHFE1; C8orf46	alcohol dehydrogenase, iron containing 1; chromosome 8 open reading frame 46	Multiple_Complex
TC2000008001.hg.1	11.76	10.18	2.99	3.4e-09	1.95e-07	ADRM1	adhesion regulating molecule 1	Multiple_Complex
TC0400009953.hg.1	6.83	4.88	3.84	1.98e-07	6.67e-06	AFAP1	actin filament associated protein 1	Multiple_Complex
TC1200010976.hg.1	8.89	9.95	-2.09	1.04e-06	2.74e-05	AGAP2	ArfGAP with GTPase domain, ankyrin repeat and PH domain 2	Multiple_Complex
TC0800012474.hg.1	10.86	9.71	2.23	2.07e-06	4.99e-05	AGO2	argonaute RISC catalytic component 2	Multiple_Complex
TC0900011992.hg.1	8.2	7.12	2.11	1.45e-05	0.0003	AGPAT2	1-acylglycerol-3-phosphate O-acyltransferase 2	Multiple_Complex
TC0600013794.hg.1	4.84	6.06	-2.33	0.0096	0.0476	AGPAT4	1-acylglycerol-3-phosphate O-acyltransferase 4	Multiple_Complex
TC1100011083.hg.1	5.56	6.62	-2.1	0.0013	0.01	AHNAK	AHNAK nucleoprotein	Multiple_Complex
TC0700006795.hg.1	13.21	11.3	3.75	1.6e-10	1.3e-08	AHR	aryl hydrocarbon receptor	Multiple_Complex
TC0200007717.hg.1	9.34	11.42	-4.25	0.0013	0.01	AHSA2	AHA1, activator of heat shock 90kDa protein ATPase homolog 2 (yeast)	Multiple_Complex
TC0600008981.hg.1	9.39	8.36	2.04	1.43e-05	0.0002	AIM1	absent in melanoma 1	Multiple_Complex
TC0700006634.hg.1	9.43	8.36	2.1	6.46e-08	2.57e-06	AIMP2	aminoacyl tRNA synthetase complex-interacting multifunctional protein 2	Multiple_Complex
TC0900012277.hg.1	9.19	11.83	-6.2	9.99e-06	0.0002	AK1	adenylate kinase 1	Coding
TC1900009867.hg.1	11.2	12.51	-2.48	4.48e-08	1.91e-06	AKAP8L	A kinase (PRKA) anchor protein 8-like	Multiple_Complex
TC0900011284.hg.1	11.45	12.59	-2.2	4.9e-08	2.04e-06	AKNA	AT-hook transcription factor	Multiple_Complex
TC0100008126.hg.1	10.52	9.47	2.07	1.75e-09	1.1e-07	AKR1A1	aldo-keto reductase family 1, member A1 (aldehyde reductase)	Multiple_Complex
TC1600010341.hg.1	6.78	7.89	-2.16	0.0003	0.0031	AKTIP	AKT interacting protein	Multiple_Complex
TC1100011739.hg.1	8.76	7.62	2.21	0.0036	0.0224	ALG8	ALG8, alpha-1,3-glucosyltransferase	Multiple_Complex
TC0200015424.hg.1	6.73	7.95	-2.32	1.67e-06	4.16e-05	ALS2CR12	amyotrophic lateral sclerosis 2 chromosome region candidate 12	Multiple_Complex
TC1100012471.hg.1	11.04	12.98	-3.85	2.49e-07	8.19e-06	AMICA1	adhesion molecule, interacts with CXADR antigen 1	Multiple_Complex
TC0100018260.hg.1	6.24	7.28	-2.06	0.0032	0.0205	AMPD2	adenosine monophosphate deaminase 2	Multiple_Complex
TC1200012202.hg.1	9.58	10.66	-2.12	0.0004	0.0039	ANAPC5	anaphase promoting complex subunit 5	Multiple_Complex
TC0500010169.hg.1	7.09	8.14	-2.07	1.15e-05	0.0002	ANKH	ANKH inorganic pyrophosphate transport regulator	Multiple_Complex
TC1200012543.hg.1	8.31	7.31	2.01	1.54e-06	3.89e-05	ANKLE2	ankyrin repeat and LEM domain containing 2	Multiple_Complex
TC0500011125.hg.1	7.89	9.39	-2.83	1.58e-06	3.97e-05	ANKRA2	ankyrin repeat, family A (RFXANK-like), 2	Multiple_Complex
TC1100008126.hg.1	10.48	11.59	-2.16	0.0003	0.0029	ANKRD13D	ankyrin repeat domain 13 family, member D	Multiple_Complex
TC0200016712.hg.1	4.91	6.21	-2.47	1.13e-05	0.0002	ANKRD23	ankyrin repeat domain 23	Multiple_Complex
TC1000010113.hg.1	7.7	9.17	-2.76	8.94e-13	1.2e-10	ANKRD26	ankyrin repeat domain 26	Multiple_Complex
TC0200008536.hg.1	7.05	8.52	-2.77	0.0004	0.0037	ANKRD36	Transcript Identified by AceView, Entrez Gene ID(s) 375248	Unassigned
TC0200008534.hg.1	9.84	11.31	-2.76	5.08e-05	0.0007	ANKRD36	ankyrin repeat domain 36	Multiple_Complex
TC0200013567.hg.1	10.7	12.2	-2.83	1.32e-05	0.0002	ANKRD36B	ankyrin repeat domain 36B	Multiple_Complex
TC0200016710.hg.1	10.7	12.59	-3.71	0.0001	0.0014	ANKRD36C	ankyrin repeat domain 36C	Multiple_Complex
TC0200010837.hg.1	9.71	11.1	-2.63	5.36e-05	0.0007	ANKZF1	ankyrin repeat and zinc finger domain containing 1	Multiple_Complex
TC0900007576.hg.1	14.41	16.36	-3.86	6.61e-06	0.0001	ANXA1	annexin A1	Multiple_Complex
TC1500009636.hg.1	10.66	8.77	3.71	7.41e-15	1.42e-12	ANXA2	annexin A2	Multiple_Complex
TC0500010628.hg.1	11.44	13.09	-3.13	2.97e-17	9.97e-15	ANXA2R	annexin A2 receptor	Coding
TC0700010751.hg.1	10.32	11.91	-3.01	0.0055	0.0311	AOAH	acyloxyacyl hydrolase (neutrophil)	Multiple_Complex
TC1500006683.hg.1	8.27	10.03	-3.39	7.42e-05	0.001	APBA2	amyloid beta (A4) precursor protein-binding, family A, member 2	Multiple_Complex
TC2200009271.hg.1	14.76	13.33	2.7	4.21e-14	7.12e-12	APOBEC3C	apolipoprotein B mRNA editing enzyme, catalytic polypeptide-like 3C	Multiple_Complex
TC2200009272.hg.1	11.21	9.93	2.42	4.85e-08	2.03e-06	APOBEC3D	apolipoprotein B mRNA editing enzyme, catalytic polypeptide-like 3D	Coding
TC2200009273.hg.1	12.26	11.18	2.11	1.32e-07	4.7e-06	APOBEC3F	apolipoprotein B mRNA editing enzyme, catalytic polypeptide-like 3F	Multiple_Complex
TC2200009274.hg.1	13.95	11.9	4.16	1.75e-14	3.16e-12	APOBEC3G	apolipoprotein B mRNA editing enzyme, catalytic polypeptide-like 3G	Multiple_Complex
TC2200008588.hg.1	6.37	8.67	-4.95	3.61e-16	9.32e-14	APOL3	apolipoprotein L, 3	Multiple_Complex
TC1200011773.hg.1	6.2	7.46	-2.4	0.0005	0.0045	APPL2	adaptor protein, phosphotyrosine interaction, PH domain and leucine zipper containing 2	Multiple_Complex
TC1300009714.hg.1	11.7	12.99	-2.45	0.0002	0.002	ARGLU1	arginine and glutamate rich 1	Multiple_Complex
TC0300008467.hg.1	7.61	4.7	7.5	3.36e-14	5.8e-12	ARHGAP31	Rho GTPase activating protein 31	Multiple_Complex
TC1200010967.hg.1	9.94	11	-2.07	0.0004	0.0037	ARHGAP9	Rho GTPase activating protein 9	Multiple_Complex
TC1900011746.hg.1	6.95	8.73	-3.44	7.2e-10	4.97e-08	ARHGEF1	Rho guanine nucleotide exchange factor 1	Multiple_Complex
TC1900011745.hg.1	10.15	11.85	-3.25	3.68e-06	8.12e-05	ARHGEF1	Rho guanine nucleotide exchange factor 1	Multiple_Complex
TC1100009287.hg.1	8.51	6.94	2.95	0.0007	0.0061	ARHGEF12	Rho guanine nucleotide exchange factor (GEF) 12	Multiple_Complex
TC0300011259.hg.1	8.16	9.3	-2.22	2.91e-05	0.0005	ARHGEF3	Rho guanine nucleotide exchange factor 3	Multiple_Complex
TC0X00010933.hg.1	9.3	10.44	-2.2	2.84e-07	9.05e-06	ARHGEF6	Rac/Cdc42 guanine nucleotide exchange factor 6	Multiple_Complex
TC0X00009869.hg.1	9.61	11	-2.62	4.29e-06	9.15e-05	ARHGEF9; ARHGEF9-IT1	Cdc42 guanine nucleotide exchange factor 9; ARHGEF9 intronic transcript 1	Multiple_Complex
TC1000007761.hg.1	11.94	10.87	2.09	1.7e-09	1.07e-07	ARID5B	AT rich interactive domain 5B (MRF1-like)	Multiple_Complex
TC0600009076.hg.1	6.32	7.56	-2.37	2.25e-07	7.44e-06	ARMC2	armadillo repeat containing 2	Multiple_Complex
TC1100011643.hg.1	7.42	8.77	-2.55	2.66e-05	0.0004	ARRB1	arrestin, beta 1	Multiple_Complex
TC1700006638.hg.1	11.1	12.13	-2.04	2.07e-07	6.91e-06	ARRB2	arrestin, beta 2	Multiple_Complex
TC1900007358.hg.1	5.29	7.21	-3.79	1.1e-08	5.55e-07	ARRDC2	arrestin domain containing 2	Multiple_Complex
TC0500011448.hg.1	11.36	13.15	-3.45	8.34e-06	0.0002	ARRDC3	arrestin domain containing 3	Multiple_Complex
TC1900009371.hg.1	7.77	9.26	-2.79	4.8e-08	2.01e-06	ARRDC5	arrestin domain containing 5	Coding
TC0500011228.hg.1	9.77	8.25	2.87	1.95e-10	1.57e-08	ARSB	arylsulfatase B	Multiple_Complex
TC0700011876.hg.1	8.75	7.53	2.33	7.05e-07	1.95e-05	ASNS	asparagine synthetase (glutamine-hydrolyzing)	Multiple_Complex
TC0800011679.hg.1	5.82	7.23	-2.66	4.05e-08	1.76e-06	ATAD2	ATPase family, AAA domain containing 2	Multiple_Complex
TC0100018157.hg.1	7.82	6.61	2.32	2.9e-06	6.64e-05	ATAD3A	ATPase family, AAA domain containing 3A	Multiple_Complex
TC0100011533.hg.1	6.78	4.94	3.59	6.67e-12	7.49e-10	ATF3	activating transcription factor 3	Multiple_Complex
TC1400009256.hg.1	7.71	8.97	-2.39	0.0024	0.0162	ATG14	autophagy related 14	Multiple_Complex
TSUnmapped00000109.hg.1	8.99	10.17	-2.26	0.0002	0.0019	ATG16L1	autophagy related 16-like 1	NonCoding
TC0200010713.hg.1	11.18	10.03	2.23	4.85e-05	0.0007	ATIC	5-aminoimidazole-4-carboxamide ribonucleotide formyltransferase/IMP cyclohydrolase	Multiple_Complex
TC1100008985.hg.1	10.99	12.97	-3.96	5.96e-17	1.91e-14	ATM	ATM serine/threonine kinase	Multiple_Complex
TC0100010543.hg.1	7.02	5.87	2.22	1.16e-05	0.0002	ATP1B1	ATPase, Na+/K+ transporting, beta 1 polypeptide	Multiple_Complex
TC0300009016.hg.1	11.08	9	4.21	3.75e-13	5.32e-11	ATP1B3	ATPase, Na+/K+ transporting, beta 3 polypeptide	Multiple_Complex
TC1700008178.hg.1	10.27	8.9	2.58	6.43e-09	3.41e-07	ATP5G1	ATP synthase, H+ transporting, mitochondrial Fo complex subunit C1 (subunit 9)	Multiple_Complex
TC0600014260.hg.1	4.66	6.15	-2.81	4.66e-10	3.39e-08	ATP6V1G2	ATPase, H+ transporting, lysosomal 13kDa, V1 subunit G2	Multiple_Complex
TC0X00007707.hg.1	5.69	6.82	-2.18	3.36e-05	0.0005	ATP7A	ATPase, Cu++ transporting, alpha polypeptide	Multiple_Complex
TC0400010558.hg.1	5.93	8.33	-5.27	1.81e-09	1.12e-07	ATP8A1	ATPase, aminophospholipid transporter (APLT), class I, type 8A, member 1	Multiple_Complex
TC0300007679.hg.1	11.6	13.08	-2.79	1.1e-07	4.01e-06	ATXN7	ataxin 7	Multiple_Complex
TC0700012165.hg.1	7.06	8.66	-3.03	1.47e-08	7.13e-07	ATXN7L1	ataxin 7-like 1	Multiple_Complex
TC0100012471.hg.1	8.61	7.51	2.15	0.0003	0.0028	AURKAIP1	aurora kinase A interacting protein 1	Multiple_Complex
TC0100008082.hg.1	7.18	5.88	2.45	1.17e-11	1.22e-09	B4GALT2	UDP-Gal:betaGlcNAc beta 1,4- galactosyltransferase, polypeptide 2	Multiple_Complex
TC0600012560.hg.1	6.04	4.99	2.07	0.0043	0.0259	BACH2	Memczak2013 ALT_ACCEPTOR, ALT_DONOR, coding, INTERNAL, intronic best transcript NM_001170794	NonCoding
TC0200014719.hg.1	7.4	8.4	-2.01	0.0024	0.0163	BAZ2B	bromodomain adjacent to zinc finger domain 2B	Multiple_Complex
TC1400007712.hg.1	12.38	10.58	3.48	5.76e-13	7.97e-11	BATF	basic leucine zipper transcription factor, ATF-like	Multiple_Complex
TC0100017258.hg.1	12.56	7.88	25.58	1.03e-26	1.88e-23	BATF3	basic leucine zipper transcription factor, ATF-like 3	Multiple_Complex
TC0700007137.hg.1	7.18	8.49	-2.48	0.001	0.0082	BBS9	Bardet-Biedl syndrome 9	Multiple_Complex
TC1200010145.hg.1	5.83	4.72	2.16	1.66e-07	5.76e-06	BCAT1	branched chain amino-acid transaminase 1, cytosolic	Multiple_Complex
TC1500010184.hg.1	13.3	10.43	7.29	2.26e-17	7.96e-15	BCL2A1	BCL2-related protein A1	Coding
TC2000008815.hg.1	9.9	7.01	7.44	1.03e-22	8.81e-20	BCL2L1	BCL2-like 1	Multiple_Complex
TC0200008870.hg.1	11.36	10.17	2.28	6.64e-06	0.0001	BCL2L11	BCL2-like 11 (apoptosis facilitator)	Multiple_Complex
TC0300013471.hg.1	10.7	11.73	-2.05	0.0023	0.0162	BCL6	B-cell CLL/lymphoma 6	Multiple_Complex
TC1100013230.hg.1	8.18	10.67	-5.61	6.32e-18	2.47e-15	BCL9L	B-cell CLL/lymphoma 9-like	Multiple_Complex
TC0300006483.hg.1	14.33	12.77	2.95	5.06e-11	4.66e-09	BHLHE40	basic helix-loop-helix family, member e40	Multiple_Complex
TC0200014160.hg.1	8.68	10.2	-2.88	1.35e-09	8.67e-08	BIN1	bridging integrator 1	Multiple_Complex
TC1100012119.hg.1	10.2	8.8	2.63	3.38e-06	7.58e-05	BIRC3	Memczak2013 ANTISENSE, CDS, coding, INTERNAL best transcript NM_182962	NonCoding
TC1100013087.hg.1	13.45	12.02	2.69	6.2e-07	1.76e-05	BIRC3	baculoviral IAP repeat containing 3	Multiple_Complex
TC0200013095.hg.1	10.72	9.36	2.57	2.93e-09	1.74e-07	BOLA3	bolA family member 3	Multiple_Complex
TC0800012202.hg.1	8.31	6.52	3.47	3.53e-08	1.56e-06	BOP1; MIR7112	block of proliferation 1; microRNA 7112	Multiple_Complex
TC1700008709.hg.1	12.32	13.41	-2.12	9.87e-06	0.0002	BPTF	bromodomain PHD finger transcription factor	Multiple_Complex
TC0500012162.hg.1	8.5	9.67	-2.24	9.19e-05	0.0012	BRD8	bromodomain containing 8	Multiple_Complex
TC2100008165.hg.1	10.54	11.7	-2.23	4.96e-06	0.0001	BRWD1	bromodomain and WD repeat domain containing 1	Multiple_Complex
TC0700006781.hg.1	7.14	6.13	2.02	0.0027	0.0183	BZW2	basic leucine zipper and W2 domains 2	Multiple_Complex
TC0600007307.hg.1	7.95	9.22	-2.41	0.0002	0.0027	BTN2A1	butyrophilin, subfamily 2, member A1	Multiple_Complex
TC0600007303.hg.1	11.49	13.31	-3.53	5.21e-14	8.66e-12	BTN3A1	butyrophilin, subfamily 3, member A1	Multiple_Complex
TC0600007301.hg.1	15.69	17.41	-3.31	3.14e-16	8.49e-14	BTN3A2	butyrophilin, subfamily 3, member A2	Multiple_Complex
TC0600007306.hg.1	11.26	12.52	-2.4	2.98e-11	2.85e-09	BTN3A3	butyrophilin, subfamily 3, member A3	Multiple_Complex
TC1600011358.hg.1	8.2	6.42	3.42	5.02e-06	0.0001	C16orf45	chromosome 16 open reading frame 45	Multiple_Complex
TC1900009394.hg.1	11.84	10.73	2.16	2.06e-06	4.96e-05	C19orf70	chromosome 19 open reading frame 70	Multiple_Complex
TC0100009417.hg.1	6.84	7.98	-2.2	2.57e-06	5.97e-05	C1orf162	chromosome 1 open reading frame 162	Multiple_Complex
TC1700012341.hg.1	10.23	8.99	2.37	2.63e-08	1.21e-06	C1QBP	complement component 1, q subcomponent binding protein	Multiple_Complex
TC2200009346.hg.1	6.08	7.82	-3.35	5.9e-08	2.38e-06	C1QTNF6	C1q and tumor necrosis factor related protein 6	NonCoding
TC1200010119.hg.1	7.53	8.97	-2.71	0.0001	0.0013	C2CD5	C2 calcium-dependent domain containing 5	Multiple_Complex
TC1900009443.hg.1	5.34	4.1	2.36	7.83e-05	0.001	C3	complement component 3	Multiple_Complex
TC1200009807.hg.1	5.43	6.61	-2.27	0.0003	0.0028	C3AR1	complement component 3a receptor 1	Coding
TC0400008424.hg.1	9.23	7.67	2.95	0.0034	0.0217	C4orf32	chromosome 4 open reading frame 32	Coding
TC0500010511.hg.1	6.78	7.89	-2.15	0.0001	0.0014	C5orf42	chromosome 5 open reading frame 42	Multiple_Complex
TC0500013425.hg.1	5.11	6.11	-2	0.0002	0.002	C5orf45	chromosome 5 open reading frame 45	Multiple_Complex
TC0500008633.hg.1	8.7	10	-2.46	5.02e-13	7e-11	C5orf56	chromosome 5 open reading frame 56	Multiple_Complex
TC0700013543.hg.1	6.23	7.32	-2.14	0.0005	0.0046	C7orf25	chromosome 7 open reading frame 25	Coding
TC0700010510.hg.1	7.25	8.58	-2.53	1.28e-06	3.3e-05	C7orf31	chromosome 7 open reading frame 31	Multiple_Complex
TC0700012296.hg.1	7.69	8.78	-2.14	0.0001	0.0013	C7orf60	chromosome 7 open reading frame 60	Multiple_Complex
TC0900010586.hg.1	7.46	6.35	2.16	0.0001	0.0013	C9orf64	chromosome 9 open reading frame 64	Multiple_Complex
TC0900009779.hg.1	5.13	7.19	-4.16	8.24e-09	4.24e-07	C9orf72	chromosome 9 open reading frame 72	Multiple_Complex
TC1000011718.hg.1	7.28	8.62	-2.54	8.21e-05	0.0011	CALHM2	calcium homeostasis modulator 2	Multiple_Complex
TC1900007108.hg.1	14.41	13.3	2.15	2.35e-09	1.42e-07	CALR	calreticulin	Multiple_Complex
TC1000011040.hg.1	9.17	10.98	-3.51	1.12e-16	3.34e-14	CAMK2G	calcium/calmodulin-dependent protein kinase II gamma	Multiple_Complex
TC0500008309.hg.1	9.76	11.02	-2.39	5.49e-07	1.59e-05	CAMK4	calcium/calmodulin-dependent protein kinase IV	Multiple_Complex
TC1500010725.hg.1	6.35	7.84	-2.8	0.0008	0.007	CAPN3	calpain 3	Multiple_Complex
TC0300006702.hg.1	9.51	10.59	-2.12	0.002	0.0142	CAPN7	calpain 7	Multiple_Complex
TC1200010265.hg.1	9.48	10.7	-2.34	7.19e-07	1.98e-05	CAPRIN2	caprin family member 2	Multiple_Complex
TC1900011061.hg.1	8.74	9.93	-2.27	9.55e-10	6.38e-08	CARD8	caspase recruitment domain family, member 8	Multiple_Complex
TC0200010507.hg.1	4.68	5.74	-2.09	6.55e-06	0.0001	CARF	calcium responsive transcription factor	Multiple_Complex
TC0700008360.hg.1	6.99	8.21	-2.34	0.0002	0.0024	CASD1	CAS1 domain containing 1	Multiple_Complex
TC0200010445.hg.1	4.9	6.47	-2.97	4.6e-10	3.35e-08	CASP10	caspase 10	Multiple_Complex
TC0200010447.hg.1	9.84	11.69	-3.6	2.62e-05	0.0004	CASP8	caspase 8, apoptosis-related cysteine peptidase	Multiple_Complex
TC1400010776.hg.1	4.55	6	-2.72	3.89e-05	0.0006	CATSPERB	catsper channel auxiliary subunit beta	Multiple_Complex
TC0400012375.hg.1	7.44	8.65	-2.32	0.0003	0.0029	CBR4	carbonyl reductase 4	Multiple_Complex
TC1700011953.hg.1	6.41	7.92	-2.86	3.28e-06	7.38e-05	CBX4	chromobox homolog 4	Multiple_Complex
TC2200007360.hg.1	5.72	7.02	-2.46	8.5e-08	3.23e-06	CBY1	chibby homolog 1 (Drosophila)	Multiple_Complex
TC0500010998.hg.1	4.54	6.03	-2.81	1.6e-06	4.01e-05	CCDC125	coiled-coil domain containing 125	Multiple_Complex
TC0300012216.hg.1	8.53	9.83	-2.47	0.0001	0.0015	CCDC14	coiled-coil domain containing 14	Multiple_Complex
TC0700013394.hg.1	6.08	8.2	-4.35	9.34e-08	3.5e-06	CCDC146	coiled-coil domain containing 146	Multiple_Complex
TC0100018220.hg.1	4.93	6.04	-2.16	3.07e-05	0.0005	CCDC30	coiled-coil domain containing 30	Multiple_Complex
TC0300014078.hg.1	5.42	6.53	-2.15	0.0028	0.0185	CCDC39	coiled-coil domain containing 39	Coding
TC1000010725.hg.1	12.67	11.4	2.4	7.67e-11	6.83e-09	CCDC6	coiled-coil domain containing 6	Multiple_Complex
TSUnmapped00000313.hg.1	8.18	9.43	-2.38	0.002	0.0145	CCDC84	coiled-coil domain containing 84	NonCoding
TSUnmapped00000268.hg.1	7.21	8.43	-2.32	0.005	0.0292	CCDC84	coiled-coil domain containing 84	NonCoding
TSUnmapped00000246.hg.1	8.33	9.54	-2.32	0.0031	0.0202	CCDC84	coiled-coil domain containing 84	NonCoding
TC1100009233.hg.1	8.5	9.68	-2.27	0.0022	0.0153	CCDC84	coiled-coil domain containing 84	Multiple_Complex
TSUnmapped00000104.hg.1	9.48	10.63	-2.21	0.0013	0.0101	CCDC84	coiled-coil domain containing 84	Coding
TSUnmapped00000045.hg.1	8.52	9.56	-2.06	0.0037	0.023	CCDC84	coiled-coil domain containing 84	Coding
TC1400009980.hg.1	8.36	9.86	-2.82	1.33e-07	4.71e-06	CCDC88C	coiled-coil domain containing 88C	Multiple_Complex
TC1700010393.hg.1	6.54	5.47	2.09	1.18e-08	5.91e-07	CCL1	chemokine (C-C motif) ligand 1	Coding
TC0200010980.hg.1	8.04	5.09	7.71	1.64e-06	4.1e-05	CCL20	chemokine (C-C motif) ligand 20	Multiple_Complex
TC1700010459.hg.1	13.24	6.45	110.62	2.44e-26	3.73e-23	CCL3	chemokine (C-C motif) ligand 3	Multiple_Complex
TC1700010461.hg.1	9.45	6.29	8.89	5.43e-16	1.34e-13	CCL3L3; CCL3L1	chemokine (C-C motif) ligand 3-like 3; chemokine (C-C motif) ligand 3-like 1	Multiple_Complex
TC1700007620.hg.1	14.15	8.98	36.14	3.5e-28	1.17e-24	CCL4L2; CCL4; CCL4L1	chemokine (C-C motif) ligand 4-like 2; chemokine (C-C motif) ligand 4; chemokine (C-C motif) ligand 4-like 1	Multiple_Complex
TC1700007626.hg.1	12.15	7.61	23.27	2.92e-20	1.79e-17	CCL4L2; CCL4L1	chemokine (C-C motif) ligand 4-like 2; chemokine (C-C motif) ligand 4-like 1	Multiple_Complex
TC1200006555.hg.1	14.79	12.97	3.52	1.26e-14	2.37e-12	CCND2	cyclin D2	Multiple_Complex
TC0500009319.hg.1	9.89	10.97	-2.11	2.99e-08	1.35e-06	CCNG1	cyclin G1	Multiple_Complex
TC0200009428.hg.1	10.96	12.38	-2.67	3.71e-05	0.0006	CCNT2	cyclin T2	Multiple_Complex
TC0300006985.hg.1	8.78	5.81	7.85	0.0001	0.0016	CCR4	chemokine (C-C motif) receptor 4	Coding
TC0100015994.hg.1	11.08	9.49	3.02	6.12e-17	1.93e-14	CCT3	chaperonin containing TCP1, subunit 3 (gamma)	Multiple_Complex
TC0200012755.hg.1	11.24	10.21	2.04	6.76e-07	1.89e-05	CCT4	chaperonin containing TCP1, subunit 4 (delta)	Multiple_Complex
TC0500006730.hg.1	14.45	12.64	3.51	1.7e-16	4.87e-14	CCT5	chaperonin containing TCP1, subunit 5 (epsilon)	Multiple_Complex
TC0700007630.hg.1	13.81	12.69	2.17	2.15e-06	5.16e-05	CCT6A	chaperonin containing TCP1, subunit 6A (zeta 1)	Multiple_Complex
TC0200008041.hg.1	11.65	10.6	2.08	6.25e-09	3.33e-07	CCT7	chaperonin containing TCP1, subunit 7 (eta)	Multiple_Complex
TC0100009742.hg.1	6.68	5.19	2.81	3.53e-10	2.69e-08	CD160	CD160 molecule	Multiple_Complex
TC0300012007.hg.1	5.81	6.93	-2.18	0.005	0.0292	CD200R1	CD200 receptor 1	Coding
TC1800008977.hg.1	9.91	8.56	2.55	0.0004	0.0038	CD226	CD226 molecule	Multiple_Complex
TC0900006559.hg.1	9.94	7.66	4.85	4.4e-16	1.12e-13	CD274	CD274 molecule	Multiple_Complex
TC0200010523.hg.1	8.85	9.88	-2.04	0.0036	0.0227	CD28	CD28 molecule	Coding
TC1900008533.hg.1	12.73	14.38	-3.13	3.21e-14	5.6e-12	CD37	CD37 molecule	Multiple_Complex
TC1100007790.hg.1	9.72	11.02	-2.46	3.11e-08	1.39e-06	CD5	CD5 molecule	Multiple_Complex
TC0100007451.hg.1	6.67	7.71	-2.06	1.55e-05	0.0003	CD52	CD52 molecule	Multiple_Complex
TC1900009439.hg.1	7.63	5.99	3.12	6.85e-12	7.65e-10	CD70	CD70 molecule	Multiple_Complex
TC1100007394.hg.1	9.54	6.99	5.86	6.76e-14	1.09e-11	CD82	CD82 molecule	Multiple_Complex
TC0600007012.hg.1	10.38	6.98	10.5	2.83e-20	1.79e-17	CD83	CD83 molecule	Multiple_Complex
TC2000006559.hg.1	8.05	10.02	-3.92	1.77e-12	2.28e-10	CDC25B	cell division cycle 25B	Multiple_Complex
TC0200016649.hg.1	9.78	5.85	15.24	0.0003	0.0035	CDC42EP3	CDC42 effector protein (Rho GTPase binding) 3	NonCoding
TC0500013225.hg.1	8.58	10.98	-5.27	1.16e-11	1.22e-09	CDC42SE2	CDC42 small effector 2	NonCoding
TC0500013227.hg.1	10.72	12.33	-3.07	0.0026	0.0176	CDC42SE2	CDC42 small effector 2	NonCoding
TC0100009020.hg.1	6.67	7.81	-2.22	1.03e-05	0.0002	CDC7	cell division cycle 7	Multiple_Complex
TC1600011448.hg.1	6.61	7.72	-2.16	0.0008	0.007	CDK10	cyclin-dependent kinase 10	Multiple_Complex
TC1700012245.hg.1	6.82	8.27	-2.74	1.22e-05	0.0002	CDK12	cyclin-dependent kinase 12	NonCoding
TC1700012277.hg.1	6.14	7.16	-2.03	0.003	0.0197	CDK5RAP3	CDK5 regulatory subunit associated protein 3	Multiple_Complex
TC0700011785.hg.1	10.52	8.02	5.66	2.42e-22	1.92e-19	CDK6	cyclin-dependent kinase 6	Multiple_Complex
TC0600007847.hg.1	8.65	6.94	3.26	4.02e-09	2.26e-07	CDKN1A	cyclin-dependent kinase inhibitor 1A (p21, Cip1)	Multiple_Complex
TC0400009458.hg.1	6.27	7.85	-2.97	2.93e-06	6.69e-05	CDKN2AIP	CDKN2A interacting protein	Multiple_Complex
TC2200007894.hg.1	7.52	9.83	-4.96	1.19e-10	1.02e-08	CECR1	cat eye syndrome chromosome region, candidate 1	Multiple_Complex
TC1600010656.hg.1	6.29	8.19	-3.74	1.3e-07	4.62e-06	CENPT	centromere protein T	Multiple_Complex
TC1200010653.hg.1	10.5	9.46	2.05	6.64e-07	1.86e-05	CERS5	ceramide synthase 5	Multiple_Complex
TC0200010443.hg.1	16.67	15.56	2.16	5.12e-12	6e-10	CFLAR	CASP8 and FADD like apoptosis regulator	Multiple_Complex
TC1500010723.hg.1	7.56	5.18	5.2	3.89e-19	1.89e-16	CHAC1	ChaC glutathione-specific gamma-glutamylcyclotransferase 1	Multiple_Complex
TC2000007169.hg.1	10.1	8.71	2.63	1.57e-10	1.29e-08	CHMP4B	charged multivesicular body protein 4B	Multiple_Complex
TC1700007718.hg.1	8.71	7.37	2.53	2.8e-11	2.72e-09	CISD3	CDGSH iron sulfur domain 3	Multiple_Complex
TC0300011124.hg.1	10.62	8.47	4.45	3.8e-06	8.29e-05	CISH	cytokine inducible SH2-containing protein	Multiple_Complex
TC0600013361.hg.1	9.86	11.57	-3.27	5.41e-14	8.93e-12	CITED2	Cbp/p300-interacting transactivator, with Glu/Asp rich carboxy-terminal domain, 2	Coding
TC1300007248.hg.1	7.35	8.64	-2.43	8.76e-06	0.0002	CKAP2	cytoskeleton associated protein 2	Multiple_Complex
TC0900007863.hg.1	7.58	6.39	2.28	1.23e-05	0.0002	CKS2	CDC28 protein kinase regulatory subunit 2	Multiple_Complex
TC0700013396.hg.1	5.11	4.03	2.1	1.8e-05	0.0003	CLDN12	claudin 12	Multiple_Complex
TC0700012043.hg.1	6.77	8.01	-2.37	4.2e-05	0.0006	CLDN15	claudin 15	Multiple_Complex
TC1200009881.hg.1	13.7	14.94	-2.36	5.52e-08	2.26e-06	CLEC2B	C-type lectin domain family 2, member B	Multiple_Complex
TC0600014265.hg.1	14.38	13.11	2.41	2.91e-11	2.79e-09	CLIC1	chloride intracellular channel 1	Coding
TC0900012024.hg.1	4.76	5.79	-2.04	0.0076	0.0399	CLIC3	chloride intracellular channel 3	Multiple_Complex
TC0100007378.hg.1	8.54	7.44	2.14	0.0002	0.0018	CLIC4	chloride intracellular channel 4	Multiple_Complex
TC0600011938.hg.1	6.23	7.75	-2.87	1.7e-05	0.0003	CLIC5	chloride intracellular channel 5	Multiple_Complex
TC0200007115.hg.1	7.47	8.55	-2.11	0.0003	0.0027	CLIP4	CAP-GLY domain containing linker protein family, member 4	Multiple_Complex
TC0200015397.hg.1	14.24	15.36	-2.18	7.36e-05	0.001	CLK1	CDC like kinase 1	Multiple_Complex
TC0500013020.hg.1	9.53	11.04	-2.86	4.87e-06	0.0001	CLK4	CDC like kinase 4	Multiple_Complex
TC1600008585.hg.1	11.99	13.5	-2.85	3.03e-05	0.0005	CMIP	c-Maf inducing protein	Multiple_Complex
TC0300008133.hg.1	6.74	5.54	2.29	1.59e-05	0.0003	CMSS1	cms1 ribosomal small subunit homolog (yeast)	Multiple_Complex
TC1900006507.hg.1	5.53	6.58	-2.08	7.35e-06	0.0001	CNN2	calponin 2	Multiple_Complex
TC1000008758.hg.1	8.34	9.54	-2.31	5.25e-08	2.17e-06	CNNM2	cyclin and CBS domain divalent metal cation transport mediator 2	Multiple_Complex
TC0200016496.hg.1	6.82	8.26	-2.72	1.02e-09	6.75e-08	CNNM3	cyclin and CBS domain divalent metal cation transport mediator 3	Multiple_Complex
TC1200008162.hg.1	10.52	11.7	-2.27	5.29e-06	0.0001	CNOT2	CCR4-NOT transcription complex subunit 2	Multiple_Complex
TC0500009181.hg.1	9.98	11.1	-2.18	8.53e-06	0.0002	CNOT8	CCR4-NOT transcription complex subunit 8	Multiple_Complex
TC0700008524.hg.1	7.32	8.94	-3.08	1.1e-10	9.63e-09	CNPY4	canopy FGF signaling regulator 4	Multiple_Complex
TC1600010765.hg.1	4.97	6.08	-2.16	3.59e-05	0.0005	COG4	component of oligomeric golgi complex 4	Multiple_Complex
TC0200007739.hg.1	8.96	7.92	2.05	0.0001	0.0016	COMMD1	copper metabolism (Murr1) domain containing 1	Multiple_Complex
TC1700010327.hg.1	7.53	5.99	2.89	3.73e-10	2.83e-08	COPRS	coordinator of PRMT5, differentiation stimulator	Multiple_Complex
TC1400007663.hg.1	6.01	7.08	-2.09	4.53e-06	9.59e-05	COQ6	coenzyme Q6 monooxygenase	Multiple_Complex
TC0300014034.hg.1	14.59	13.59	2	2.82e-08	1.28e-06	COX17	COX17 cytochrome c oxidase copper chaperone	Multiple_Complex
TC0500009488.hg.1	8.29	9.75	-2.75	3.56e-06	7.95e-05	CREBRF	CREB3 regulatory factor	Multiple_Complex
TC1100011829.hg.1	9.43	10.83	-2.64	0.0003	0.003	CREBZF	CREB/ATF bZIP transcription factor	Multiple_Complex
TC2200007780.hg.1	7.55	6.42	2.19	5.81e-07	1.67e-05	CRELD2	cysteine rich with EGF-like domains 2	Multiple_Complex
TC1000007272.hg.1	13.33	11.65	3.21	2.8e-09	1.68e-07	CREM	cAMP responsive element modulator	Multiple_Complex
TC0400006519.hg.1	7.81	9.71	-3.73	0.0004	0.0042	CRIPAK	cysteine-rich PAK1 inhibitor	Coding
TC1100009334.hg.1	12.69	8.3	21.09	3.84e-22	2.84e-19	CRTAM	cytotoxic and regulatory T-cell molecule	Multiple_Complex
TC0300014084.hg.1	6.74	8.09	-2.55	0.0077	0.0402	CRYGS	crystallin gamma S	Multiple_Complex
TC0100009364.hg.1	12.03	9.05	7.88	2.94e-12	3.64e-10	CSF1	colony stimulating factor 1 (macrophage)	Multiple_Complex
TC0500008620.hg.1	7.46	4.68	6.89	1.19e-23	1.11e-20	CSF2	colony stimulating factor 2 (granulocyte-macrophage)	Coding
TC0300010770.hg.1	8.69	7.38	2.49	1.64e-05	0.0003	CSRNP1	cysteine-serine-rich nuclear protein 1	Multiple_Complex
TC0700009502.hg.1	8.06	9.08	-2.04	0.0057	0.0322	CTAGE15	CTAGE family, member 15	Coding
TC0700012896.hg.1	5.43	6.76	-2.52	0.0005	0.0045	CTAGE6	CTAGE family, member 6	Coding
TC0700012911.hg.1	4.72	5.81	-2.12	0.0072	0.0383	CTAGE8	CTAGE family, member 8	Coding
TC1700009681.hg.1	8.37	9.71	-2.53	5.33e-06	0.0001	CTC1	CTS telomere maintenance complex component 1	Multiple_Complex
TC1900008465.hg.1	6.3	7.42	-2.17	6.89e-05	0.0009	CTC-453G23.8; CARD8; nekera	Memczak2013 ANTISENSE, CDS, coding, INTERNAL best transcript NM_014959; Transcript Identified by AceView; novel transcript, antisense to CARD8	NonCoding
TC1200010984.hg.1	8.62	9.89	-2.41	6.53e-06	0.0001	CTDSP2	CTD small phosphatase 2	Multiple_Complex
TC0200010525.hg.1	6.91	5.34	2.97	5.64e-07	1.63e-05	CTLA4	cytotoxic T-lymphocyte-associated protein 4	Multiple_Complex
TC0X00009153.hg.1	7.79	8.87	-2.11	0.0002	0.0024	CTPS2	CTP synthase 2	Multiple_Complex
TC0100009441.hg.1	6.53	5.24	2.46	7.27e-07	2e-05	CTTNBP2NL	CTTNBP2 N-terminal like	Multiple_Complex
TC1600008836.hg.1	7.33	6.23	2.14	6.58e-08	2.61e-06	CTU2	cytosolic thiouridylase subunit 2 homolog (S. pombe)	Multiple_Complex
TC1000009916.hg.1	5.81	7.69	-3.68	7.15e-08	2.81e-06	CUBN	cubilin (intrinsic factor-cobalamin receptor)	Multiple_Complex
TC0600011546.hg.1	14.03	15.15	-2.17	6.71e-10	4.67e-08	CUTA	cutA divalent cation tolerance homolog (E. coli)	Multiple_Complex
TC0X00009980.hg.1	9.58	11.18	-3.03	4.34e-05	0.0006	CXorf65	chromosome X open reading frame 65	Multiple_Complex
TC1600011220.hg.1	13.05	14.12	-2.1	9.81e-06	0.0002	CYBA	cytochrome b-245, alpha polypeptide	Multiple_Complex
TC0700010509.hg.1	12.92	11.27	3.14	3.68e-14	6.32e-12	CYCS	cytochrome c, somatic	Coding
TC0500009211.hg.1	8.84	9.96	-2.18	3.39e-05	0.0005	CYFIP2	cytoplasmic FMR1 interacting protein 2	Multiple_Complex
TC1700012477.hg.1	5.78	6.82	-2.05	0.0002	0.0018	CYGB; RP11-666A8.8	Transcript Identified by AceView, Entrez Gene ID(s) 114757; novel transcript, antisense to PRCD	Multiple_Complex
TC1100010185.hg.1	8.16	9.38	-2.32	0.0009	0.0078	CYP2R1	cytochrome P450, family 2, subfamily R, polypeptide 1	Multiple_Complex
TC0400012874.hg.1	6.53	7.58	-2.08	0.0006	0.0054	CYP4V2	cytochrome P450, family 4, subfamily V, polypeptide 2	Multiple_Complex
TC0700013584.hg.1	10.42	8.2	4.64	3.2e-16	8.49e-14	CYP51A1	cytochrome P450, family 51, subfamily A, polypeptide 1	Multiple_Complex
TC0500008849.hg.1	8.03	6.85	2.27	5.59e-10	3.99e-08	CYSTM1	cysteine-rich transmembrane module containing 1	Multiple_Complex
TC1700011910.hg.1	10.6	12.09	-2.8	3.69e-08	1.62e-06	CYTH1	cytohesin 1	Multiple_Complex
TC2200007287.hg.1	7.66	9.29	-3.09	3.25e-09	1.88e-07	CYTH4	cytohesin 4	Multiple_Complex
TC0200009065.hg.1	13.24	12.01	2.34	9.11e-08	3.44e-06	DBI	diazepam binding inhibitor (GABA receptor modulator, acyl-CoA binding protein)	Multiple_Complex
TC1900011084.hg.1	6.46	8.31	-3.62	1.56e-13	2.35e-11	DBP	D site of albumin promoter (albumin D-box) binding protein	Multiple_Complex
TC1400009538.hg.1	11.14	12.27	-2.19	4.61e-07	1.37e-05	DCAF5	DDB1 and CUL4 associated factor 5	Multiple_Complex
TC0100018516.hg.1	6.25	7.27	-2.02	0.0015	0.0112	DCAF8	DDB1 and CUL4 associated factor 8	Multiple_Complex
TC1700010859.hg.1	8.36	9.88	-2.86	5.72e-08	2.32e-06	DCAKD	dephospho-CoA kinase domain containing	Multiple_Complex
TC1000009873.hg.1	7.74	8.8	-2.09	0.0065	0.0355	DCLRE1C	DNA cross-link repair 1C	Multiple_Complex
TC1200009590.hg.1	9.81	10.94	-2.19	4.6e-06	9.72e-05	DCP1B	decapping mRNA 1B	Multiple_Complex
TC1600009966.hg.1	9.48	7.45	4.07	1.61e-15	3.53e-13	DCTPP1	dCTP pyrophosphatase 1	Multiple_Complex
TC0800007330.hg.1	5.68	6.88	-2.29	0.0002	0.0022	DDHD2	DDHD domain containing 2	Multiple_Complex
TC2200008703.hg.1	14.92	16.01	-2.13	3.24e-06	7.32e-05	DDX17	DEAD (Asp-Glu-Ala-Asp) box helicase 17	Multiple_Complex
TC1000007876.hg.1	9.11	7.65	2.74	7.51e-06	0.0001	DDX21	DEAD (Asp-Glu-Ala-Asp) box helicase 21	Multiple_Complex
TC0600014261.hg.1	11.29	12.64	-2.55	3.26e-05	0.0005	DDX39B; SNORD84	DEAD (Asp-Glu-Ala-Asp) box polypeptide 39B; small nucleolar RNA, C/D box 84	Multiple_Complex
TC0100015265.hg.1	8.58	10.04	-2.75	2.16e-08	1.03e-06	DENND2D	DENN/MADD domain containing 2D	Multiple_Complex
TC0900006758.hg.1	8.15	9.61	-2.77	3.09e-07	9.73e-06	DENND4C	DENN/MADD domain containing 4C	Multiple_Complex
TC2200008832.hg.1	11.56	10.04	2.88	9.47e-16	2.17e-13	DESI1	desumoylating isopeptidase 1	Multiple_Complex
TC0100014276.hg.1	9.16	7.08	4.22	1.77e-10	1.44e-08	DHCR24	24-dehydrocholesterol reductase	Multiple_Complex
TC1600008328.hg.1	8	9.09	-2.13	6.92e-05	0.0009	DHODH	dihydroorotate dehydrogenase (quinone)	Multiple_Complex
TC1400008750.hg.1	8.82	9.86	-2.05	1.26e-06	3.25e-05	DHRS1	dehydrogenase/reductase (SDR family) member 1	Multiple_Complex
TC1700010707.hg.1	5.9	7.16	-2.4	8.63e-06	0.0002	DHX58	DEXH (Asp-Glu-X-His) box polypeptide 58	Multiple_Complex
TC0300008563.hg.1	6.07	7.72	-3.12	7.2e-09	3.76e-07	DIRC2	disrupted in renal carcinoma 2	Multiple_Complex
TC1300008938.hg.1	9.07	7.89	2.26	1.6e-07	5.58e-06	DLEU2; MIR15A; MIR16-1; MIR3613	deleted in lymphocytic leukemia 2 (non-protein coding); microRNA 15a; microRNA 16-1; microRNA 3613	Multiple_Complex
TC1700009619.hg.1	4.09	6.67	-6.01	6.67e-13	9.05e-11	DLG4	discs, large homolog 4 (Drosophila)	Multiple_Complex
TC0100008090.hg.1	6.09	7.39	-2.46	0.0018	0.0135	DMAP1	DNA methyltransferase 1 associated protein 1	Multiple_Complex
TC0900006961.hg.1	12.69	11.64	2.08	0.0015	0.0114	DNAJA1	DnaJ (Hsp40) homolog, subfamily A, member 1	Multiple_Complex
TC0300013911.hg.1	12.11	10.04	4.2	2.89e-12	3.62e-10	DNAJB11	DnaJ (Hsp40) homolog, subfamily B, member 11	Multiple_Complex
TC0200011992.hg.1	4.44	5.51	-2.09	2.98e-05	0.0005	DNAJC27	DnaJ (Hsp40) homolog, subfamily C, member 27	Multiple_Complex
TC2100007999.hg.1	5.77	7.14	-2.59	1.54e-05	0.0003	DNAJC28	DnaJ (Hsp40) homolog, subfamily C, member 28	Coding
TC1300007755.hg.1	7.82	6.78	2.05	5.16e-05	0.0007	DNAJC3	DnaJ (Hsp40) homolog, subfamily C, member 3	Multiple_Complex
TC1100013032.hg.1	10.66	12.14	-2.79	1.44e-11	1.48e-09	DNAJC4	DnaJ (Hsp40) homolog, subfamily C, member 4	Multiple_Complex
TC1000012565.hg.1	4.44	5.67	-2.36	8.12e-05	0.0011	DNAJC9	DnaJ (Hsp40) homolog, subfamily C, member 9	NonCoding
TC1600011345.hg.1	7.42	8.67	-2.38	4.06e-08	1.76e-06	DNASE1	deoxyribonuclease I	Multiple_Complex
TC0200015893.hg.1	10.23	11.23	-2	0.0026	0.0176	DOCK10	dedicator of cytokinesis 10	Multiple_Complex
TC0900006438.hg.1	10.8	12.2	-2.64	1.7e-05	0.0003	DOCK8	dedicator of cytokinesis 8	Multiple_Complex
TC0600008663.hg.1	7.2	8.27	-2.11	0.0012	0.0097	DOPEY1	dopey family member 1	Multiple_Complex
TC0300010424.hg.1	10.14	8.65	2.82	1.38e-12	1.79e-10	DPH3	diphthamide biosynthesis 3	Multiple_Complex
TC0100015023.hg.1	9.99	11.35	-2.57	3.25e-05	0.0005	DPYD	dihydropyrimidine dehydrogenase	Multiple_Complex
TC0800007086.hg.1	7.56	8.65	-2.14	0.0009	0.0073	DPYSL2	dihydropyrimidinase-like 2	Multiple_Complex
TC2000009016.hg.1	6.04	7.33	-2.43	7.88e-07	2.14e-05	DSN1	DSN1 homolog, MIS12 kinetochore complex component	Multiple_Complex
TC0300008289.hg.1	5.12	6.33	-2.31	4.65e-07	1.38e-05	DZIP3	DAZ interacting zinc finger protein 3	Multiple_Complex
TC0600010901.hg.1	9.67	10.71	-2.05	3.79e-07	1.15e-05	DTNBP1	dystrobrevin binding protein 1	Multiple_Complex
TC1200007891.hg.1	6.44	7.48	-2.07	0.0052	0.0302	DTX3	deltex 3, E3 ubiquitin ligase	Multiple_Complex
TC2200008449.hg.1	7.43	6.41	2.03	5.18e-06	0.0001	DUSP18	dual specificity phosphatase 18	Multiple_Complex
TC0800010002.hg.1	12.87	9.49	10.43	3.4e-16	8.88e-14	DUSP4	dual specificity phosphatase 4	Multiple_Complex
TC1000008891.hg.1	11.42	8.38	8.21	3.51e-19	1.79e-16	DUSP5	dual specificity phosphatase 5	Multiple_Complex
TC1200011470.hg.1	10.12	7.71	5.31	1.84e-09	1.14e-07	DUSP6	dual specificity phosphatase 6	Multiple_Complex
TC1500007163.hg.1	9.25	10.4	-2.22	2.65e-07	8.58e-06	DUT	deoxyuridine triphosphatase	Multiple_Complex
TC2100007082.hg.1	9.42	10.49	-2.1	2.21e-06	5.29e-05	DYRK1A	dual specificity tyrosine-(Y)-phosphorylation regulated kinase 1A	Multiple_Complex
TC1200008081.hg.1	6.42	7.62	-2.31	2.99e-05	0.0005	DYRK2	dual specificity tyrosine-(Y)-phosphorylation regulated kinase 2	Multiple_Complex
TC0100011382.hg.1	8.23	7	2.34	1.67e-07	5.78e-06	DYRK3	dual specificity tyrosine-(Y)-phosphorylation regulated kinase 3	Multiple_Complex
TC1400008908.hg.1	10.55	11.75	-2.3	9.14e-08	3.45e-06	EAPP	E2F-associated phosphoprotein	Multiple_Complex
TC0100018435.hg.1	8.95	7.41	2.92	3.96e-07	1.2e-05	EBNA1BP2; MIR6733	EBNA1 binding protein 2; microRNA 6733	Multiple_Complex
TC0100013205.hg.1	11.95	10.79	2.23	2.43e-08	1.14e-06	ECE1	endothelin converting enzyme 1	Multiple_Complex
TC0100008588.hg.1	5.01	6.19	-2.27	3.99e-05	0.0006	EFCAB7; DLEU2L	EF-hand calcium binding domain 7; deleted in lymphocytic leukemia 2-like	Multiple_Complex
TC0600008255.hg.1	5.3	6.42	-2.17	0.0002	0.0023	EFHC1	EF-hand domain (C-terminal) containing 1	Multiple_Complex
TC1400010731.hg.1	4.38	5.7	-2.5	9.17e-05	0.0012	EGLN3	egl-9 family hypoxia-inducible factor 3	NonCoding
TC1000010768.hg.1	13.94	6.58	165.03	3e-27	6.96e-24	EGR2	early growth response 2	Multiple_Complex
TC0800009856.hg.1	5.92	4.46	2.76	0.0049	0.0285	EGR3	early growth response 3	Multiple_Complex
TC2000008909.hg.1	14.04	13	2.05	9e-06	0.0002	EIF2S2	eukaryotic translation initiation factor 2, subunit 2 beta, 38kDa	Multiple_Complex
TC1600007354.hg.1	13.49	12.26	2.34	2.53e-07	8.28e-06	EIF3C; EIF3CL	eukaryotic translation initiation factor 3, subunit C; eukaryotic translation initiation factor 3, subunit C-like	Multiple_Complex
TC1200007687.hg.1	12.01	13.19	-2.26	9.41e-05	0.0012	EIF4B	eukaryotic translation initiation factor 4B	Multiple_Complex
TC2200008482.hg.1	10.54	9.32	2.33	1.53e-10	1.28e-08	EIF4ENIF1	eukaryotic translation initiation factor 4E nuclear import factor 1	Multiple_Complex
TC0X00010799.hg.1	7.37	8.4	-2.04	0.0037	0.0231	ELF4	E74-like factor 4 (ets domain transcription factor)	Multiple_Complex
TC0500011502.hg.1	12.64	11.32	2.49	2.23e-08	1.05e-06	ELL2	elongation factor, RNA polymerase II, 2	Multiple_Complex
TC0400012956.hg.1	7.53	5.62	3.76	3.91e-10	2.92e-08	ELOVL6	ELOVL fatty acid elongase 6	Multiple_Complex
TC1800007091.hg.1	7.43	8.5	-2.09	0.0008	0.0069	ELP2	elongator acetyltransferase complex subunit 2	Multiple_Complex
TC0200007353.hg.1	13.65	15.2	-2.92	2.16e-06	5.18e-05	EML4	echinoderm microtubule associated protein like 4	Multiple_Complex
TC0600011943.hg.1	5.75	7.47	-3.28	1.39e-06	3.53e-05	ENPP5	ectonucleotide pyrophosphatase/phosphodiesterase 5 (putative)	Multiple_Complex
TC1700012027.hg.1	5.32	6.35	-2.05	0.0003	0.0031	ENTHD2	ENTH domain containing 2	Multiple_Complex
TC0200007458.hg.1	6.64	5.45	2.28	2.29e-06	5.45e-05	EPAS1	endothelial PAS domain protein 1	Multiple_Complex
TC0100007574.hg.1	13.21	14.73	-2.87	5.57e-18	2.25e-15	EPB41	erythrocyte membrane protein band 4.1	Multiple_Complex
TC0700012886.hg.1	4.17	5.35	-2.27	6e-05	0.0008	EPHA1	EPH receptor A1	Multiple_Complex
TC0200015815.hg.1	5.28	6.34	-2.08	0.0003	0.003	EPHA4	EPH receptor A4	Multiple_Complex
TC0800007110.hg.1	4.06	5.39	-2.52	1.94e-08	9.26e-07	EPHX2	epoxide hydrolase 2, cytoplasmic	Multiple_Complex
TC1300009994.hg.1	7.88	8.93	-2.08	7.61e-06	0.0001	ERCC5	excision repair cross-complementation group 5	Multiple_Complex
TC1200010023.hg.1	7.95	10.05	-4.27	4.24e-07	1.27e-05	ERP27	endoplasmic reticulum protein 27	Multiple_Complex
TC0100018403.hg.1	6.83	5.04	3.45	4.08e-11	3.84e-09	ERRFI1	ERBB receptor feedback inhibitor 1	Multiple_Complex
TC1700010738.hg.1	11.06	12.54	-2.78	1.8e-12	2.32e-10	EZH1	enhancer of zeste 1 polycomb repressive complex 2 subunit	Multiple_Complex
TC1100012775.hg.1	12.72	13.82	-2.15	0.0005	0.0047	ETS1	v-ets avian erythroblastosis virus E26 oncogene homolog 1	Multiple_Complex
TC2100007140.hg.1	8.2	6.86	2.53	3.4e-09	1.95e-07	ETS2	v-ets avian erythroblastosis virus E26 oncogene homolog 2	Multiple_Complex
TC1400008193.hg.1	12.33	14.1	-3.41	1.09e-16	3.28e-14	EVL	Enah/Vasp-like	Multiple_Complex
TC0400007572.hg.1	9.77	10.89	-2.17	1.7e-06	4.23e-05	EXOC1	exocyst complex component 1	Multiple_Complex
TC0100016356.hg.1	7.81	5.34	5.54	3.96e-10	2.94e-08	F5	coagulation factor V (proaccelerin, labile factor)	Multiple_Complex
TC0X00007416.hg.1	6.69	7.92	-2.35	0.0097	0.0478	FAAH2	fatty acid amide hydrolase 2	Multiple_Complex
TC0800008080.hg.1	12.82	9.69	8.73	2.66e-17	9.07e-15	FABP5	fatty acid binding protein 5 (psoriasis-associated)	Multiple_Complex
TC1100010987.hg.1	12.91	9.54	10.28	2.28e-23	2.04e-20	FABP5	fatty acid binding protein 5 (psoriasis-associated)	Multiple_Complex
TC0900011613.hg.1	11.6	13.06	-2.75	7.15e-09	3.75e-07	FAM102A	family with sequence similarity 102, member A	Multiple_Complex
TC0900008836.hg.1	8.68	10.06	-2.61	6.32e-08	2.53e-06	FAM102A	Memczak2013 ANTISENSE, CDS, coding, INTERNAL, intronic, UTR3 best transcript NM_203305	NonCoding
TC1100007728.hg.1	8.29	10.47	-4.56	1.73e-07	5.92e-06	FAM111A	family with sequence similarity 111, member A	Multiple_Complex
TC0200010502.hg.1	8.82	10.95	-4.36	5.22e-16	1.3e-13	FAM117B	family with sequence similarity 117, member B	Multiple_Complex
TC2200007614.hg.1	8.89	10.11	-2.34	9.69e-05	0.0012	FAM118A	family with sequence similarity 118, member A	Multiple_Complex
TC0X00008481.hg.1	8.55	9.69	-2.19	0.0001	0.0016	FAM122C	family with sequence similarity 122C	Multiple_Complex
TC0500012153.hg.1	6.84	8.01	-2.26	0.0013	0.0102	FAM13B	family with sequence similarity 13, member B	Multiple_Complex
TC0500013417.hg.1	6.38	8.08	-3.26	0.0003	0.0028	FAM153A	family with sequence similarity 153, member A	NonCoding
TC0500013418.hg.1	4.63	5.91	-2.43	8.11e-05	0.0011	FAM153A	family with sequence similarity 153, member A	Multiple_Complex
TC0500013269.hg.1	4.54	5.97	-2.69	4.16e-05	0.0006	FAM153B	family with sequence similarity 153, member B	NonCoding
TC0900009333.hg.1	7.48	8.5	-2.02	8.09e-06	0.0002	FAM157B	family with sequence similarity 157, member B	Multiple_Complex
TC0100008326.hg.1	8.25	10.22	-3.9	9.22e-18	3.41e-15	FAM159A	family with sequence similarity 159, member A	Multiple_Complex
TC0500010081.hg.1	4.81	5.89	-2.12	0.0007	0.0062	FAM173B	Transcript Identified by AceView, Entrez Gene ID(s) 134145	Unassigned
TC1500009460.hg.1	5.58	7.58	-4.01	2.28e-08	1.07e-06	FAM214A	family with sequence similarity 214, member A	Multiple_Complex
TC1200008843.hg.1	7.12	8.38	-2.4	1.32e-08	6.49e-07	FAM216A	family with sequence similarity 216, member A	Multiple_Complex
TC1000007483.hg.1	11.15	12.28	-2.2	5.34e-05	0.0007	FAM21C	family with sequence similarity 21, member C	Multiple_Complex
TC0100013610.hg.1	5.46	7.09	-3.11	3.82e-05	0.0006	FAM229A	family with sequence similarity 229, member A	Multiple_Complex
TC1000012600.hg.1	6.91	8.19	-2.43	6.03e-06	0.0001	FAM24B	family with sequence similarity 24, member B	Multiple_Complex
TC0700012427.hg.1	10.47	9.46	2.01	6.8e-07	1.89e-05	FAM3C	family with sequence similarity 3, member C	Multiple_Complex
TC0X00006789.hg.1	10.86	9.77	2.13	7.09e-08	2.79e-06	FAM3C2	FAM3C pseudogene	Multiple_Complex
TC0600014247.hg.1	11.92	13.66	-3.34	1.09e-09	7.14e-08	FAM65B	family with sequence similarity 65, member B	Multiple_Complex
TC0900011769.hg.1	5.97	7.23	-2.38	7.54e-08	2.94e-06	FAM78A	family with sequence similarity 78, member A	Multiple_Complex
TC0600007092.hg.1	7.35	8.63	-2.42	5.32e-08	2.18e-06	FAM8A1	family with sequence similarity 8, member A1	Multiple_Complex
TC0300006575.hg.1	5.44	6.57	-2.2	3.96e-05	0.0006	FANCD2	Fanconi anemia complementation group D2	Multiple_Complex
TC0200015838.hg.1	10.84	9.25	3.01	3.14e-14	5.52e-12	FARSB	phenylalanyl-tRNA synthetase beta subunit	Multiple_Complex
TC1700012093.hg.1	10.03	8.61	2.68	6.02e-05	0.0008	FASN	fatty acid synthase	Multiple_Complex
TC1100010491.hg.1	6.33	7.43	-2.14	1.28e-05	0.0002	FBXO3	F-box protein 3	Multiple_Complex
TC0800011683.hg.1	7.01	9.28	-4.84	4.97e-13	6.96e-11	FBXO32	F-box protein 32	Multiple_Complex
TC0500007758.hg.1	4.86	5.86	-2	0.0067	0.0363	FCHO2	FCH domain only 2	Multiple_Complex
TC0100017110.hg.1	9.87	12.58	-6.56	4.71e-18	1.94e-15	FCMR	Fc fragment of IgM receptor	Multiple_Complex
TC0100016049.hg.1	11.84	10.22	3.06	0.001	0.0082	FCRL3	Fc receptor-like 3	Multiple_Complex
TC0100010123.hg.1	10.94	9.82	2.17	2.1e-05	0.0003	FDPS	farnesyl diphosphate synthase	Multiple_Complex
TC1100012708.hg.1	10.73	5.3	43.2	8.64e-24	8.42e-21	FEZ1	fasciculation and elongation protein zeta 1	Multiple_Complex
TC0900007971.hg.1	9.96	11.42	-2.76	7.98e-13	1.08e-10	FGD3	FYVE, RhoGEF and PH domain containing 3	Multiple_Complex
TC1300006543.hg.1	5.99	7.4	-2.67	0.0017	0.0125	FGF9	fibroblast growth factor 9	Multiple_Complex
TC0400012902.hg.1	11.02	12.91	-3.71	0.0004	0.0037	FGFBP2	fibroblast growth factor binding protein 2	Coding
TC1100007941.hg.1	8.71	7.51	2.29	0.0006	0.0057	FKBP2	FK506 binding protein 2	Multiple_Complex
TC0600011635.hg.1	8.29	9.4	-2.16	2.57e-05	0.0004	FKBP5	FK506 binding protein 5	Multiple_Complex
TC1100009485.hg.1	9.47	10.64	-2.24	7.71e-10	5.27e-08	FLI1	Fli-1 proto-oncogene, ETS transcription factor	Multiple_Complex
TC0X00008826.hg.1	10.66	9.6	2.09	0.007	0.0376	FLNA	Jeck2013 ANTISENSE, CDS, coding, INTERNAL, OVCODE, OVEXON best transcript NM_001110556	NonCoding
TC1600006644.hg.1	7.42	8.74	-2.5	7.54e-05	0.001	FLYWCH1	FLYWCH-type zinc finger 1	Multiple_Complex
TC1100011259.hg.1	6.8	5.13	3.16	3.34e-11	3.16e-09	FOSL1	FOS-like antigen 1	Multiple_Complex
TC0300011502.hg.1	5.92	7	-2.11	2.67e-05	0.0004	FOXP1; RP11-298C2.1	Transcript Identified by AceView, Entrez Gene ID(s) 27086; novel transcript, sense intronic to FOXP1	NonCoding
TC0X00009667.hg.1	6.74	4.65	4.26	3.92e-10	2.92e-08	FOXP3	forkhead box P3	Coding
TC0600008006.hg.1	9.63	7.39	4.7	8.22e-15	1.56e-12	FOXP4; MIR4641	forkhead box P4; microRNA 4641	Multiple_Complex
TC0X00008070.hg.1	4.8	6.62	-3.52	3.75e-06	8.22e-05	FRMPD3	FERM and PDZ domain containing 3	Multiple_Complex
TC0X00008862.hg.1	11.27	9.91	2.56	3.27e-10	2.51e-08	FUNDC2	FUN14 domain containing 2	Multiple_Complex
TC1500008335.hg.1	10.32	7.65	6.33	4.25e-10	3.12e-08	FURIN	furin (paired basic amino acid cleaving enzyme)	Multiple_Complex
TC1600007521.hg.1	11.93	10.66	2.4	2.5e-07	8.2e-06	FUS	FUS RNA binding protein	Multiple_Complex
TC1900012001.hg.1	5.27	6.31	-2.06	0.0016	0.012	FUZ	fuzzy planar cell polarity protein	Multiple_Complex
TC1000008046.hg.1	8.18	9.21	-2.04	0.0008	0.007	FUT11	fucosyltransferase 11 (alpha (1,3) fucosyltransferase)	Multiple_Complex
TC0500010553.hg.1	12.98	14.83	-3.6	1.32e-11	1.37e-09	FYB	FYN binding protein	Multiple_Complex
TC0X00011221.hg.1	9.38	11.12	-3.33	0.0089	0.045	GAB3	GRB2-associated binding protein 3	Multiple_Complex
TC1500009386.hg.1	10.17	8.94	2.35	9.3e-10	6.27e-08	GABPB1	GA binding protein transcription factor, beta subunit 1	Multiple_Complex
TC0100008664.hg.1	8.79	7.01	3.44	1.94e-09	1.2e-07	GADD45A	growth arrest and DNA-damage-inducible, alpha	Multiple_Complex
TC0200007296.hg.1	9.56	8.2	2.55	0.0001	0.0015	GALM	galactose mutarotase (aldose 1-epimerase)	Multiple_Complex
TC0900012119.hg.1	7.9	9.33	-2.7	1.32e-09	8.55e-08	GALT	galactose-1-phosphate uridylyltransferase	Multiple_Complex
TC1500010724.hg.1	6.44	8.25	-3.5	5.35e-09	2.91e-07	GANC	glucosidase, alpha; neutral C	Multiple_Complex
TC0700007098.hg.1	13.98	12.23	3.37	2.59e-16	7.31e-14	GARS	glycyl-tRNA synthetase	Multiple_Complex
TC0700013400.hg.1	7.84	9.03	-2.28	1.78e-06	4.37e-05	GATAD1	GATA zinc finger domain containing 1	Multiple_Complex
TC0700011982.hg.1	8.21	9.23	-2.02	0.0002	0.0024	GATS	GATS, stromal antigen 3 opposite strand	Multiple_Complex
TC2200009337.hg.1	5.9	7.05	-2.22	2.85e-07	9.07e-06	GATSL3	GATS protein-like 3	Multiple_Complex
TC0100014849.hg.1	10.08	11.2	-2.17	2.97e-07	9.38e-06	GBP3	guanylate binding protein 3	Multiple_Complex
TC0200013805.hg.1	6.38	7.97	-3.01	1.28e-05	0.0002	GCC2	Jeck2013 ANTISENSE, CDS, coding, INTERNAL, intronic, OVCODE, OVEXON best transcript NM_181453	NonCoding
TC0200008803.hg.1	9.57	11.06	-2.81	0.0002	0.0018	GCC2	GRIP and coiled-coil domain containing 2	Multiple_Complex
TC0100014966.hg.1	7.58	6.47	2.16	1.69e-06	4.19e-05	GCLM	glutamate-cysteine ligase, modifier subunit	Multiple_Complex
TC0300011988.hg.1	10.02	8.53	2.8	0.009	0.0453	GCSAM	germinal center-associated, signaling and motility	Coding
TC1600009953.hg.1	6.36	9.02	-6.29	3.99e-07	1.21e-05	GDPD3	glycerophosphodiester phosphodiesterase domain containing 3	Multiple_Complex
TC1100011652.hg.1	4.66	6.01	-2.55	0.0003	0.0031	GDPD5	glycerophosphodiester phosphodiesterase domain containing 5	Multiple_Complex
TC0100012055.hg.1	9.12	10.17	-2.06	3.05e-06	6.94e-05	GGPS1	geranylgeranyl diphosphate synthase 1	Multiple_Complex
TC0700013491.hg.1	11.46	12.67	-2.31	1.03e-09	6.81e-08	GIMAP1-GIMAP5; GIMAP5; GIMAP1	GIMAP1-GIMAP5 readthrough; GTPase, IMAP family member 5; GTPase, IMAP family member 1	Multiple_Complex
TC0700009678.hg.1	8.96	10.63	-3.19	2.46e-08	1.15e-06	GIMAP2	GTPase, IMAP family member 2	Multiple_Complex
TC0700009677.hg.1	9.6	11.72	-4.33	3.86e-13	5.45e-11	GIMAP4	GTPase, IMAP family member 4	Multiple_Complex
TC0700009676.hg.1	11.11	13.28	-4.5	2.86e-15	5.96e-13	GIMAP7	GTPase, IMAP family member 7	Coding
TC0700009675.hg.1	5.81	7.03	-2.32	4.77e-08	2.01e-06	GIMAP8	GTPase, IMAP family member 8	Multiple_Complex
TC0300012664.hg.1	7.44	8.52	-2.12	0.003	0.0196	GK5	glycerol kinase 5 (putative)	Multiple_Complex
TC0900010580.hg.1	7.48	9.04	-2.94	4.57e-08	1.93e-06	GKAP1	G kinase anchoring protein 1	Multiple_Complex
TC1500007691.hg.1	5.56	6.67	-2.16	9.44e-06	0.0002	GLCE	glucuronic acid epimerase	Multiple_Complex
TC0500011497.hg.1	8.22	9.55	-2.51	2.81e-09	1.68e-07	GLRX	glutaredoxin	Multiple_Complex
TC0600014126.hg.1	7.4	8.59	-2.28	2.35e-05	0.0004	GLTSCR1L	GLTSCR1-like	Multiple_Complex
TC0200007929.hg.1	7.64	9.03	-2.62	2.42e-05	0.0004	GMCL1	germ cell-less, spermatogenesis associated 1	Multiple_Complex
TC0300013980.hg.1	7.84	6.75	2.13	9.24e-07	2.48e-05	GMPPB	GDP-mannose pyrophosphorylase B	Multiple_Complex
TC0700010075.hg.1	9.68	8.64	2.04	7.81e-06	0.0002	GNA12	guanine nucleotide binding protein (G protein) alpha 12	Multiple_Complex
TC1900006620.hg.1	6.64	5.45	2.28	7.57e-06	0.0001	GNA15	guanine nucleotide binding protein (G protein), alpha 15 (Gq class)	Multiple_Complex
TC0100017834.hg.1	7.3	4.21	8.48	5.39e-20	3.13e-17	GNG4	guanine nucleotide binding protein (G protein), gamma 4	Multiple_Complex
TC1900009240.hg.1	5.47	7.46	-3.98	6.35e-09	3.38e-07	GNG7	guanine nucleotide binding protein (G protein), gamma 7	Coding
TC0200008268.hg.1	15.41	16.92	-2.86	0.0032	0.0204	GNLY	granulysin	Multiple_Complex
TC1500008183.hg.1	9.63	10.89	-2.4	0.0021	0.0149	GOLGA6L3	golgin A6 family-like 3	Multiple_Complex
TC1500010780.hg.1	5.47	6.57	-2.14	1.17e-05	0.0002	GOLGA6L9	golgin A6 family-like 9	Multiple_Complex
TC1500008988.hg.1	9.16	11.25	-4.28	0.0023	0.0158	GOLGA8A; GOLGA8B	golgin A8 family, member A; golgin A8 family, member B	Multiple_Complex
TC1500008995.hg.1	9.06	11.09	-4.1	0.0013	0.0104	GOLGA8B	golgin A8 family, member B	Multiple_Complex
TC1500010712.hg.1	8.52	10.34	-3.52	1e-05	0.0002	GOLGA8N	golgin A8 family, member N	Multiple_Complex
TC1500008933.hg.1	6.87	7.87	-2.01	0.0019	0.0135	GOLGA8O	golgin A8 family, member O	Multiple_Complex
TC0300012170.hg.1	6.49	7.68	-2.27	0.0007	0.0059	GOLGB1	golgin B1	Multiple_Complex
TC1000011585.hg.1	10.24	8.95	2.44	4.05e-08	1.76e-06	GOT1	glutamic-oxaloacetic transaminase 1, soluble	Multiple_Complex
TC0100016006.hg.1	8.81	7.69	2.17	2.68e-07	8.63e-06	GPATCH4	G-patch domain containing 4	Multiple_Complex
TC0200014991.hg.1	7.09	9.12	-4.09	9.44e-12	1.02e-09	GPR155	G protein-coupled receptor 155	Multiple_Complex
TC0300012812.hg.1	10.88	9.29	3.01	9.15e-09	4.67e-07	GPR171	G protein-coupled receptor 171	Coding
TC0X00007977.hg.1	5.33	6.41	-2.11	2.34e-05	0.0004	GPRASP1	G protein-coupled receptor associated sorting protein 1	Multiple_Complex
TC0400009936.hg.1	12.38	11.33	2.07	2.48e-06	5.84e-05	GRPEL1	GrpE-like 1, mitochondrial (E. coli)	Multiple_Complex
TC1900011775.hg.1	8.1	7.04	2.09	6.72e-06	0.0001	GRWD1	glutamate-rich WD repeat containing 1	Multiple_Complex
TC1700010590.hg.1	9.25	11.07	-3.52	0.0002	0.0019	GSDMB	gasdermin B	Multiple_Complex
TC0700009485.hg.1	9.86	11.12	-2.39	9.22e-08	3.47e-06	GSTK1	glutathione S-transferase kappa 1	Multiple_Complex
TC0100018263.hg.1	5.85	6.87	-2.03	0.0012	0.0096	GSTM1	glutathione S-transferase mu 1	Multiple_Complex
TC0100018262.hg.1	4.87	6.45	-2.99	2.54e-07	8.3e-06	GSTM2	glutathione S-transferase mu 2 (muscle)	Multiple_Complex
TC0500007413.hg.1	12.21	13.61	-2.64	0.0004	0.0039	GZMA	granzyme A	Multiple_Complex
TC1400008764.hg.1	13.61	10.69	7.57	3.72e-17	1.21e-14	GZMB	granzyme B	Coding
TC0200009189.hg.1	9.63	10.98	-2.55	1.28e-10	1.09e-08	GYPC	glycophorin C (Gerbich blood group)	Multiple_Complex
TC0500012100.hg.1	13.05	11.97	2.1	1.34e-08	6.55e-07	H2AFY	H2A histone family, member Y	Multiple_Complex
TC0900009685.hg.1	8.18	9.7	-2.88	4.78e-06	0.0001	HACD4	3-hydroxyacyl-CoA dehydratase 4	Multiple_Complex
TC0500012588.hg.1	4.68	5.73	-2.06	2.34e-05	0.0004	HAVCR1	hepatitis A virus cellular receptor 1	Multiple_Complex
TC0500012238.hg.1	7.78	6	3.44	1.59e-10	1.3e-08	HBEGF	heparin-binding EGF-like growth factor	Multiple_Complex
TC0700008747.hg.1	10.39	11.44	-2.07	4.33e-05	0.0006	HBP1	HMG-box transcription factor 1	Multiple_Complex
TC0200016252.hg.1	9.8	11.13	-2.52	1.03e-06	2.72e-05	HDAC4	histone deacetylase 4	Multiple_Complex
TC1000008435.hg.1	7.54	6.21	2.51	1.91e-07	6.49e-06	HECTD2	HECT domain containing E3 ubiquitin protein ligase 2	Multiple_Complex
TC1500008616.hg.1	6.12	7.96	-3.58	2.15e-05	0.0004	HERC2P3	hect domain and RLD 2 pseudogene 3	Multiple_Complex
TC0400012826.hg.1	6.75	8.02	-2.42	3.64e-05	0.0005	HERC3	HECT and RLD domain containing E3 ubiquitin protein ligase 3	Multiple_Complex
TC0400011291.hg.1	8.54	9.79	-2.39	3.78e-05	0.0006	HERC6	Memczak2013 ANTISENSE, coding, INTERNAL, intronic best transcript NM_001165136	NonCoding
TC0600007270.hg.1	8.11	9.76	-3.15	6.09e-12	6.95e-10	HIST1H2AC	histone cluster 1, H2ac	Multiple_Complex
TC0600007285.hg.1	8.74	10.64	-3.72	2.59e-05	0.0004	HIST1H2AE	histone cluster 1, H2ae	Coding
TC0600014083.hg.1	12.3	14.35	-4.15	1.17e-09	7.61e-08	HIST1H2AG	histone cluster 1, H2ag	Coding
TC0600007374.hg.1	6.31	7.58	-2.42	1.3e-06	3.33e-05	HIST1H2AI	histone cluster 1, H2ai	Coding
TC0600011228.hg.1	4.93	6.24	-2.48	0.0004	0.0036	HIST1H2AK	histone cluster 1, H2ak	Coding
TC0600007274.hg.1	6.42	7.82	-2.64	1.95e-06	4.73e-05	HIST1H2BD	histone cluster 1, H2bd	Coding
TC0600007282.hg.1	7.55	8.94	-2.62	1.34e-05	0.0002	HIST1H2BF	histone cluster 1, H2bf	Coding
TC0600011136.hg.1	8.48	9.56	-2.11	0.0001	0.0017	HIST1H2BG	histone cluster 1, H2bg	Multiple_Complex
TC0600007268.hg.1	16.05	17.06	-2.02	2.76e-05	0.0004	HIST1H4C	histone cluster 1, H4c	Coding
TC0600011134.hg.1	7.37	8.5	-2.19	0.0099	0.0488	HIST1H4D	histone cluster 1, H4d	Coding
TC0600007284.hg.1	13.23	15.4	-4.5	3.42e-09	1.95e-07	HIST1H4E	histone cluster 1, H4e	Multiple_Complex
TC0600011145.hg.1	6.36	7.95	-3.02	7.72e-05	0.001	HIST1H4H	histone cluster 1, H4h	Coding
TC0100018483.hg.1	6.17	7.35	-2.27	2.43e-06	5.73e-05	HIST2H2BE	histone cluster 2, H2be	Coding
TC0100015696.hg.1	14.15	15.28	-2.2	1.12e-06	2.94e-05	HIST2H2BF	histone cluster 2, H2bf	Multiple_Complex
TC0100011871.hg.1	4.59	5.65	-2.09	0.0055	0.0311	HIST3H2BB	histone cluster 3, H2bb	Coding
TC0100013873.hg.1	7.9	6.25	3.14	9.39e-10	6.31e-08	HIVEP3	human immunodeficiency virus type I enhancer binding protein 3	Multiple_Complex
TC1900011722.hg.1	8.05	9.42	-2.58	0.0002	0.0024	HKR1	HKR1, GLI-Kruppel zinc finger family member	Multiple_Complex
TC0600014276.hg.1	7.56	9.09	-2.89	4.51e-06	9.56e-05	HLA-DMB	major histocompatibility complex, class II, DM beta	Multiple_Complex
TC0600007657.hg.1	9.63	8.47	2.23	0.0028	0.0186	HLA-DQA1	major histocompatibility complex, class II, DQ alpha 1	Multiple_Complex
TC2000009903.hg.1	13.31	12.11	2.3	2.84e-11	2.74e-09	HM13; MCTS2P	histocompatibility (minor) 13; malignant T-cell amplified sequence 2, pseudogene	Multiple_Complex
TSUnmapped00000438.hg.1	7.75	6.71	2.06	9.96e-07	2.65e-05	HMBS	hydroxymethylbilane synthase	Coding
TSUnmapped00000260.hg.1	7	5.81	2.27	1.42e-09	9.08e-08	HMBS	hydroxymethylbilane synthase	Coding
TSUnmapped00000307.hg.1	9.73	8.33	2.64	3.19e-10	2.46e-08	HMBS	hydroxymethylbilane synthase	Coding
TSUnmapped00000077.hg.1	9.59	8.03	2.95	7.72e-12	8.56e-10	HMBS	hydroxymethylbilane synthase	Coding
TC0500010635.hg.1	7.45	6.15	2.46	2.34e-06	5.55e-05	HMGCS1	3-hydroxy-3-methylglutaryl-CoA synthase 1 (soluble)	Multiple_Complex
TC0600012363.hg.1	8.95	10	-2.07	3.48e-05	0.0005	HMGN3	high mobility group nucleosomal binding domain 3	Multiple_Complex
TC0200012288.hg.1	8.73	7.67	2.09	0.0002	0.0019	HNRNPLL	heterogeneous nuclear ribonucleoprotein L-like	Multiple_Complex
TC0300009131.hg.1	10	11.11	-2.17	1.3e-05	0.0002	HPS3	Hermansky-Pudlak syndrome 3	Multiple_Complex
TC1800007829.hg.1	6.12	7.17	-2.07	3.95e-05	0.0006	HSBP1L1	heat shock factor binding protein 1-like 1	Multiple_Complex
TC0X00009762.hg.1	11.52	10.4	2.18	1.75e-05	0.0003	HSD17B10	hydroxysteroid (17-beta) dehydrogenase 10	Multiple_Complex
TC0400012945.hg.1	10.35	11.41	-2.09	1.48e-05	0.0003	HSD17B11	hydroxysteroid (17-beta) dehydrogenase 11	Multiple_Complex
TC1100012992.hg.1	7.38	6.22	2.23	2.09e-05	0.0003	HSD17B12	hydroxysteroid (17-beta) dehydrogenase 12	Multiple_Complex
TC0600008129.hg.1	16.73	15.06	3.17	2.07e-26	3.42e-23	HSP90AB1	heat shock protein 90kDa alpha (cytosolic), class B member 1	Multiple_Complex
TC0900011523.hg.1	11.12	9.99	2.19	1.41e-07	4.96e-06	HSPA5	heat shock 70kDa protein 5 (glucose-regulated protein, 78kDa)	Multiple_Complex
TC1100012613.hg.1	17.91	16.7	2.3	2.8e-15	5.88e-13	HSPA8; SNORD14C; SNORD14D	heat shock 70kDa protein 8; small nucleolar RNA, C/D box 14C; small nucleolar RNA, C/D box 14D	Multiple_Complex
TC0700008090.hg.1	10.17	8.71	2.74	4.38e-08	1.88e-06	HSPB1	heat shock 27kDa protein 1	Multiple_Complex
TC0200016584.hg.1	15.51	14.15	2.58	1.15e-10	9.97e-09	HSPE1	heat shock 10kDa protein 1	Multiple_Complex
TC1300008533.hg.1	13.19	11.39	3.48	5.17e-09	2.82e-07	HSPH1	heat shock 105kDa/110kDa protein 1	Multiple_Complex
TC0X00009767.hg.1	9.5	8.37	2.19	3.41e-07	1.06e-05	HUWE1	HECT, UBA and WWE domain containing 1, E3 ubiquitin protein ligase	Multiple_Complex
TSUnmapped00000558.hg.1	11.74	10.58	2.24	4.32e-06	9.2e-05	HYOU1	hypoxia up-regulated 1	NonCoding
TC1100012510.hg.1	14.4	13.22	2.26	7.64e-07	2.09e-05	HYOU1	hypoxia up-regulated 1	Multiple_Complex
TSUnmapped00000484.hg.1	12.27	11.08	2.29	3.84e-07	1.16e-05	HYOU1	hypoxia up-regulated 1	Coding
TSUnmapped00000322.hg.1	9.05	7.82	2.35	2.01e-05	0.0003	HYOU1	hypoxia up-regulated 1	Coding
TSUnmapped00000440.hg.1	9.81	8.57	2.36	1.15e-07	4.14e-06	HYOU1	hypoxia up-regulated 1	Coding
TSUnmapped00000244.hg.1	13.22	11.97	2.38	6.63e-07	1.86e-05	HYOU1	hypoxia up-regulated 1	Coding
TSUnmapped00000327.hg.1	10.22	8.92	2.45	3.06e-06	6.95e-05	HYOU1	hypoxia up-regulated 1	Coding
TSUnmapped00000383.hg.1	9.35	8.04	2.47	3.01e-07	9.48e-06	HYOU1	hypoxia up-regulated 1	Coding
TSUnmapped00000777.hg.1	12.11	10.62	2.82	2.05e-11	2.04e-09	HYOU1	hypoxia up-regulated 1	Coding
TSUnmapped00000138.hg.1	11.98	10.45	2.89	1.93e-11	1.93e-09	HYOU1	hypoxia up-regulated 1	Coding
TSUnmapped00000300.hg.1	12.83	11.18	3.15	4.43e-12	5.28e-10	HYOU1	hypoxia up-regulated 1	Coding
TC0900010789.hg.1	9.94	8.82	2.18	3.29e-06	7.39e-05	IARS	isoleucyl-tRNA synthetase	Multiple_Complex
TC0200006627.hg.1	11.38	9.91	2.78	3.23e-09	1.88e-07	ID2	inhibitor of DNA binding 2, dominant negative helix-loop-helix protein	Multiple_Complex
TC0100018323.hg.1	6.97	5.9	2.09	1.51e-05	0.0003	IER5	immediate early response 5	Coding
TC1000008400.hg.1	3.99	5.24	-2.38	0.0001	0.0017	IFIT1	interferon-induced protein with tetratricopeptide repeats 1	Coding
TC1000008396.hg.1	6.01	7.97	-3.9	5.74e-06	0.0001	IFIT2	interferon-induced protein with tetratricopeptide repeats 2	Coding
TC1100012949.hg.1	13.84	15.17	-2.52	1.32e-08	6.49e-07	IFITM1	interferon induced transmembrane protein 1	Multiple_Complex
TC1100009657.hg.1	10.9	12	-2.14	3.55e-06	7.91e-05	IFITM3	interferon induced transmembrane protein 3	Multiple_Complex
TC1200011177.hg.1	15.95	6.92	526.04	3.25e-27	6.96e-24	IFNG	interferon, gamma	Multiple_Complex
TC0300013981.hg.1	8.74	7.68	2.08	1.75e-06	4.31e-05	IFRD2	interferon-related developmental regulator 2	Multiple_Complex
TC0200012082.hg.1	6.88	8.17	-2.44	0.0004	0.0036	IFT172	intraflagellar transport 172	Multiple_Complex
TC1500008485.hg.1	6.79	8.05	-2.39	1.27e-09	8.26e-08	IGF1R	insulin-like growth factor 1 receptor	Multiple_Complex
TC0600010066.hg.1	10.68	9.04	3.1	5.52e-11	5.06e-09	IGF2R	insulin-like growth factor 2 receptor	Multiple_Complex
TC1900011929.hg.1	11.56	9.58	3.93	2.42e-10	1.9e-08	IGFLR1	IGF like family receptor 1	Multiple_Complex
TC0500008846.hg.1	8.76	10.11	-2.54	2.6e-06	6.02e-05	IGIP	IgA-inducing protein	Coding
TC0700007505.hg.1	10.02	11.31	-2.45	1.36e-05	0.0002	IKZF1	IKAROS family zinc finger 1	Multiple_Complex
TC0100008653.hg.1	10.6	7	12.06	5.53e-15	1.1e-12	IL12RB2	interleukin 12 receptor, beta 2	Multiple_Complex
TC0500008642.hg.1	5.75	3.5	4.75	6.39e-15	1.25e-12	IL13	interleukin 13	Multiple_Complex
TC1500010778.hg.1	11.79	13.65	-3.61	1.51e-25	2.02e-22	IL16	interleukin 16	Multiple_Complex
TC0200008675.hg.1	10.1	8.63	2.78	0.0002	0.0024	IL18RAP	interleukin 18 receptor accessory protein	Multiple_Complex
TC0400011754.hg.1	5.18	3.85	2.52	9.31e-12	1.01e-09	IL2	interleukin 2	Multiple_Complex
TC1600007315.hg.1	6.59	5.32	2.42	6.41e-07	1.82e-05	IL21R	interleukin 21 receptor	Multiple_Complex
TC0100008648.hg.1	5.65	4.6	2.07	0.001	0.0081	IL23R	interleukin 23 receptor	Multiple_Complex
TC1000009691.hg.1	15.39	7.64	215.82	4.06e-34	4.59e-30	IL2RA	interleukin 2 receptor, alpha	Coding
TC2200008637.hg.1	12.07	10.99	2.11	4.35e-08	1.87e-06	IL2RB	interleukin 2 receptor, beta	Multiple_Complex
TC1600007312.hg.1	13.03	11.81	2.33	0.0003	0.0033	IL4R	interleukin 4 receptor	Multiple_Complex
TC0500007138.hg.1	13.06	14.45	-2.62	6.69e-06	0.0001	IL7R	interleukin 7 receptor	Multiple_Complex
TC0200009299.hg.1	7.99	6.91	2.1	2.27e-05	0.0004	IMP4	IMP4 homolog, U3 small nucleolar ribonucleoprotein	Multiple_Complex
TC0400009462.hg.1	7.63	8.66	-2.04	9.12e-05	0.0012	ING2	inhibitor of growth family member 2	Coding
TC1200009747.hg.1	10.02	11.65	-3.09	1.2e-10	1.02e-08	ING4	inhibitor of growth family member 4	Multiple_Complex
TSUnmapped00000401.hg.1	8.12	9.88	-3.38	4.82e-05	0.0007	INPP5D	inositol polyphosphate-5-phosphatase D	NonCoding
TSUnmapped00000290.hg.1	6.52	8.16	-3.11	0.0002	0.002	INPP5D	inositol polyphosphate-5-phosphatase D	NonCoding
TSUnmapped00000446.hg.1	7.6	9.01	-2.66	2.58e-07	8.39e-06	INPP5D	inositol polyphosphate-5-phosphatase D	Coding
TSUnmapped00000661.hg.1	9.86	11.22	-2.57	3.6e-08	1.59e-06	INPP5D	inositol polyphosphate-5-phosphatase D	Coding
TSUnmapped00000135.hg.1	11.44	12.79	-2.56	3.14e-08	1.4e-06	INPP5D	inositol polyphosphate-5-phosphatase D	Coding
TSUnmapped00000377.hg.1	11.22	12.41	-2.27	3.29e-10	2.52e-08	INPP5D	inositol polyphosphate-5-phosphatase D	NonCoding
TC0200011121.hg.1	10.88	11.95	-2.1	1.15e-06	2.99e-05	INPP5D	inositol polyphosphate-5-phosphatase D	Multiple_Complex
TC1100011735.hg.1	6.5	8.32	-3.52	8.41e-07	2.28e-05	INTS4	integrator complex subunit 4	Multiple_Complex
TC1300007791.hg.1	6.56	5.48	2.12	2.15e-05	0.0004	IPO5	importin 5	Multiple_Complex
TC1200007406.hg.1	8.46	9.53	-2.09	0.001	0.0082	IRAK4	interleukin 1 receptor associated kinase 4	Multiple_Complex
TC0600006442.hg.1	13.99	10.42	11.83	5.39e-21	3.61e-18	IRF4	interferon regulatory factor 4	Multiple_Complex
TC1600008712.hg.1	5.48	4.34	2.22	2.34e-07	7.72e-06	IRF8	interferon regulatory factor 8	Multiple_Complex
TC1200012571.hg.1	11.34	12.65	-2.47	7.05e-05	0.0009	ITFG2	integrin alpha FG-GAP repeat containing 2	Multiple_Complex
TC0200009973.hg.1	8.65	10.16	-2.85	2.89e-05	0.0004	ITGA6	integrin alpha 6	Multiple_Complex
TC0300013994.hg.1	6.99	8.85	-3.62	0.0002	0.0021	ITIH4	inter-alpha-trypsin inhibitor heavy chain family, member 4	Multiple_Complex
TC0400009897.hg.1	9.03	7.6	2.68	1.81e-10	1.46e-08	JAKMIP1	janus kinase and microtubule interacting protein 1	Multiple_Complex
TC0500007881.hg.1	9.41	10.54	-2.19	0.0011	0.0087	JMY	junction mediating and regulatory protein, p53 cofactor	Multiple_Complex
TC1700012415.hg.1	8	9.59	-3.01	1.3e-06	3.33e-05	KAT2A	K(lysine) acetyltransferase 2A	Multiple_Complex
TSUnmapped00000389.hg.1	5.18	6.68	-2.83	1.96e-05	0.0003	KAT6B	K(lysine) acetyltransferase 6B	Coding
TSUnmapped00000492.hg.1	6.44	7.7	-2.39	1.95e-05	0.0003	KAT6B	K(lysine) acetyltransferase 6B	Coding
TSUnmapped00000364.hg.1	7.31	8.35	-2.05	8.51e-06	0.0002	KAT6B	K(lysine) acetyltransferase 6B	Coding
TC0100006675.hg.1	12.73	13.86	-2.19	2.73e-06	6.3e-05	KCNAB2	potassium channel, voltage gated subfamily A regulatory beta subunit 2	Multiple_Complex
TC0600011733.hg.1	5.71	4.04	3.2	3.62e-18	1.55e-15	KCNK5	potassium channel, two pore domain subfamily K, member 5	Multiple_Complex
TC0200015388.hg.1	6.41	7.49	-2.11	3.45e-07	1.07e-05	KCTD18	potassium channel tetramerization domain containing 18	Multiple_Complex
TC1100008120.hg.1	10.13	11.37	-2.37	5.93e-05	0.0008	KDM2A	lysine (K)-specific demethylase 2A	Multiple_Complex
TC1200012206.hg.1	10.02	11.51	-2.8	3.72e-06	8.19e-05	KDM2B	lysine (K)-specific demethylase 2B	Multiple_Complex
TC0900006597.hg.1	6.65	7.77	-2.18	4.1e-05	0.0006	KDM4C	lysine (K)-specific demethylase 4C	Multiple_Complex
TC1700006772.hg.1	12.63	11.15	2.78	5.7e-08	2.31e-06	KDM6B	lysine (K)-specific demethylase 6B	Multiple_Complex
TC0700012798.hg.1	10.83	12.14	-2.49	0.0002	0.0019	KDM7A	lysine (K)-specific demethylase 7A	Multiple_Complex
TC1400007310.hg.1	9.01	10.6	-3.01	1.58e-10	1.3e-08	KIAA0586	KIAA0586	Multiple_Complex
TC0400008609.hg.1	7.58	8.82	-2.36	0.0033	0.0209	KIAA1109	KIAA1109	Multiple_Complex
TC1200007251.hg.1	10.36	12.28	-3.79	4.98e-10	3.58e-08	KIAA1551	KIAA1551	Multiple_Complex
TC0900012201.hg.1	4.95	6.3	-2.54	9.45e-06	0.0002	KIAA2026	KIAA2026	NonCoding
TC0900012202.hg.1	9.75	10.94	-2.29	3.39e-05	0.0005	KIAA2026	KIAA2026	Multiple_Complex
TC0900010582.hg.1	5.61	6.7	-2.13	5.25e-06	0.0001	KIF27	kinesin family member 27	Multiple_Complex
TC2000006894.hg.1	9.06	10.07	-2.02	1.18e-08	5.91e-07	KIZ	kizuna centrosomal protein	Multiple_Complex
TC0400007264.hg.1	6.62	7.62	-2	0.0001	0.0015	KLF3	Kruppel-like factor 3 (basic)	Multiple_Complex
TC0200015538.hg.1	10.01	11.36	-2.55	7.65e-06	0.0002	KLF7	Kruppel-like factor 7 (ubiquitous)	Multiple_Complex
TC1400007093.hg.1	7.1	8.22	-2.17	4.76e-07	1.41e-05	KLHDC1	kelch domain containing 1	Multiple_Complex
TC0300009673.hg.1	9.09	10.55	-2.75	1.36e-10	1.15e-08	KLHL24	kelch-like family member 24	Multiple_Complex
TC1200006788.hg.1	13.48	11.7	3.42	5.93e-12	6.84e-10	KLRD1	killer cell lectin-like receptor subfamily D, member 1	Multiple_Complex
TC1700008719.hg.1	9.95	7.92	4.1	1.52e-17	5.54e-15	KPNA2	karyopherin alpha 2 (RAG cohort 1, importin alpha 1)	Multiple_Complex
TC1400010757.hg.1	8.84	10.59	-3.37	4.81e-05	0.0007	L3HYPDH	L-3-hydroxyproline dehydratase (trans-)	Multiple_Complex
TC1900011414.hg.1	8.36	6.86	2.85	2.69e-06	6.23e-05	LAIR1	leukocyte-associated immunoglobulin-like receptor 1	Multiple_Complex
TC0700007610.hg.1	9.11	7.13	3.94	1.21e-06	3.15e-05	LANCL2	LanC lantibiotic synthetase component C-like 2 (bacterial)	Multiple_Complex
TC0100013534.hg.1	11.4	13.18	-3.43	5.18e-14	8.66e-12	LAPTM5	lysosomal protein transmembrane 5	Multiple_Complex
TC0100007676.hg.1	7.87	9.36	-2.8	1.23e-08	6.12e-07	LCK	LCK proto-oncogene, Src family tyrosine kinase	Multiple_Complex
TC1000011669.hg.1	10.34	11.9	-2.94	2.32e-10	1.83e-08	LDB1	LIM domain binding 1	Multiple_Complex
TC1900007012.hg.1	8.6	6.74	3.64	6.43e-07	1.82e-05	LDLR; MIR6886	low density lipoprotein receptor; microRNA 6886	Multiple_Complex
TC0100007406.hg.1	8.22	10.16	-3.86	9.51e-16	2.17e-13	LDLRAP1	low density lipoprotein receptor adaptor protein 1	Multiple_Complex
TC0400011548.hg.1	10.81	12.39	-2.98	4.37e-11	4.07e-09	LEF1	lymphoid enhancer-binding factor 1	Multiple_Complex
TC1900008860.hg.1	13.99	15.1	-2.16	0.0019	0.0139	LENG8	leukocyte receptor cluster (LRC) member 8	Multiple_Complex
TC0800012287.hg.1	12.39	13.6	-2.32	1.9e-10	1.54e-08	LEPROTL1	leptin receptor overlapping transcript-like 1	Multiple_Complex
TC2200007312.hg.1	14.99	13.75	2.37	2.33e-06	5.52e-05	LGALS1	lectin, galactoside-binding, soluble, 1	Multiple_Complex
TC0600011387.hg.1	6.28	7.32	-2.06	5.68e-05	0.0008	LINC00243	long intergenic non-protein coding RNA 243	NonCoding
TC2000009957.hg.1	8.37	9.41	-2.05	4.54e-05	0.0007	LINC00266-1	long intergenic non-protein coding RNA 266-1	Multiple_Complex
TC1600010122.hg.1	4.94	3.89	2.07	0.0024	0.0166	LINC00273	long intergenic non-protein coding RNA 273	Multiple_Complex
TC2100006982.hg.1	5.55	7.11	-2.94	2.21e-06	5.29e-05	LINC00649	long intergenic non-protein coding RNA 649	Multiple_Complex
TC1200012860.hg.1	9.25	11.14	-3.7	7.02e-14	1.12e-11	LINC01089	long intergenic non-protein coding RNA 1089	NonCoding
TC1500010787.hg.1	13.05	14.06	-2.01	6e-08	2.41e-06	LINC01578	long intergenic non-protein coding RNA 1578	NonCoding
TC1400010748.hg.1	8.71	7.45	2.38	3.03e-06	6.91e-05	LINC01588	long intergenic non-protein coding RNA 1588	Multiple_Complex
TC1500010945.hg.1	8.68	9.77	-2.12	0.0033	0.0212	LINS1	lines homolog 1	Multiple_Complex
TC0200016498.hg.1	4.35	5.39	-2.04	8.96e-06	0.0002	LIPT1	lipoyltransferase 1	Multiple_Complex
TC1600008991.hg.1	5.89	8.06	-4.49	1.51e-13	2.3e-11	LMF1	lipase maturation factor 1	Multiple_Complex
TC0300010077.hg.1	4.44	5.48	-2.06	0.0005	0.0049	LMLN	leishmanolysin-like (metallopeptidase M8 family)	Multiple_Complex
TC0100010152.hg.1	8.27	6.08	4.55	2.04e-09	1.25e-07	LMNA	lamin A/C	Multiple_Complex
TC1300009980.hg.1	5.18	6.58	-2.65	2.75e-06	6.33e-05	LMO7	LIM domain 7	Multiple_Complex
TC0500008157.hg.1	13.66	14.75	-2.13	4.19e-09	2.35e-07	LNPEP	leucyl/cystinyl aminopeptidase	Multiple_Complex
TC1100012443.hg.1	6.22	7.24	-2.03	1.38e-06	3.52e-05	LOC100652768; PCSK7	uncharacterized LOC100652768; Salzman2013 ANNOTATED, ncRNA, OVCODE, OVERLAPTX, OVEXON best transcript NR_045215; Transcript Identified by AceView, Entrez Gene ID(s) 9159	Multiple_Complex
TC1700012242.hg.1	6.42	7.66	-2.36	0.0003	0.0032	LOC101060389; TBC1D3D	TBC1 domain family member-like; TBC1 domain family, member 3D [Source:HGNC Symbol;Acc:HGNC:28944]	Coding
TC0100015608.hg.1	7.36	8.47	-2.16	1.37e-06	3.49e-05	LOC105371242; AC243756.1	peptidyl-prolyl cis-trans isomerase A-like 4G; Peptidyl-prolyl cis-trans isomerase [Source:UniProtKB/TrEMBL;Acc:A0A075B767]	Coding
TC0100009696.hg.1	6.46	7.69	-2.35	1e-07	3.69e-06	LOC388692; FAM231D; RP11-403I13.7; RP11-403I13.8	Homo sapiens uncharacterized LOC388692 (LOC388692), long non-coding RNA.; Homo sapiens family with sequence similarity 231, member D (FAM231D), long non-coding RNA.; novel transcript	NonCoding
TC1700010004.hg.1	5.66	6.9	-2.36	0.001	0.0084	LOC79999; LOC388436; AC007952.6	Homo sapiens uncharacterized LOC79999 (LOC79999), mRNA.; Homo sapiens uncharacterized protein ENSP00000382042 (LOC388436), mRNA.; novel transcript antisense to GRAPL	Multiple_Complex
TC1700012206.hg.1	5.04	6.28	-2.37	0.001	0.008	LOC79999; LOC388436; RP11-744A16.4	uncharacterized LOC79999; Homo sapiens uncharacterized protein ENSP00000382042 (LOC388436), mRNA.; novel transcript	Multiple_Complex
TC1500008986.hg.1	7.92	8.93	-2.01	0.005	0.0292	LPCAT4	lysophosphatidylcholine acyltransferase 4	Multiple_Complex
TC0300010068.hg.1	9.07	10.2	-2.2	0.0008	0.0068	LRCH3	leucine-rich repeats and calponin homology (CH) domain containing 3	Multiple_Complex
TSUnmapped00000585.hg.1	9.18	8.12	2.08	0.0002	0.0024	LRIG1		NonCoding
TC2200008257.hg.1	5.77	6.85	-2.11	0.0054	0.031	LRP5L	LDL receptor related protein 5 like	Multiple_Complex
TC0100014228.hg.1	9.52	8.06	2.76	2.2e-10	1.75e-08	LRP8	LDL receptor related protein 8	Multiple_Complex
TC1200012590.hg.1	5.71	6.93	-2.33	3.31e-06	7.43e-05	LRRC23	leucine rich repeat containing 23	Multiple_Complex
TC1500008511.hg.1	7.32	8.36	-2.06	0.001	0.008	LRRC28	leucine rich repeat containing 28	Multiple_Complex
TC1100011694.hg.1	6.84	5.49	2.54	2.82e-08	1.28e-06	LRRC32	leucine rich repeat containing 32	Multiple_Complex
TC1700008095.hg.1	11.83	13.42	-3	3.71e-05	0.0006	LRRC37A	leucine rich repeat containing 37A	Multiple_Complex
TC1700008102.hg.1	11.59	12.82	-2.36	0.0042	0.0253	LRRC37A2	leucine rich repeat containing 37, member A2	Multiple_Complex
TC1700011465.hg.1	7.92	9.38	-2.75	6.7e-06	0.0001	LRRC37A3	leucine rich repeat containing 37, member A3	Multiple_Complex
TC1700012423.hg.1	7.02	8.2	-2.27	0.0008	0.0069	LRRC37A4P	leucine rich repeat containing 37, member A4, pseudogene	Multiple_Complex
TC1700012227.hg.1	6.74	8.56	-3.52	7.4e-11	6.62e-09	LRRC37B	leucine rich repeat containing 37B	NonCoding
TC1700012228.hg.1	7.91	8.94	-2.05	0.0008	0.0071	LRRC37B	leucine rich repeat containing 37B	Multiple_Complex
TC1700011097.hg.1	8.79	7.64	2.21	4.63e-07	1.37e-05	LRRC59	leucine rich repeat containing 59	Multiple_Complex
TC0600007595.hg.1	8.63	6.2	5.41	3.24e-19	1.69e-16	LTA	lymphotoxin alpha	Multiple_Complex
TC1600008932.hg.1	8.29	9.36	-2.09	0.0094	0.0469	LUC7L	LUC7-like	Multiple_Complex
TC1700012283.hg.1	13.65	15.06	-2.65	2.14e-05	0.0004	LUC7L3	LUC7-like 3 pre-mRNA splicing factor	Multiple_Complex
TC0100010314.hg.1	6.44	8.58	-4.39	4.18e-14	7.11e-12	LY9	lymphocyte antigen 9	Multiple_Complex
TC0600010688.hg.1	5.95	4.89	2.08	3.58e-06	7.97e-05	LYRM4	LYR motif containing 4	Multiple_Complex
TC1200007105.hg.1	6.16	7.52	-2.58	1.51e-07	5.28e-06	LYRM5	LYR motif containing 5	Multiple_Complex
TC1600010951.hg.1	10.93	9.76	2.26	2.87e-19	1.58e-16	MAF	v-maf avian musculoaponeurotic fibrosarcoma oncogene homolog	Coding
TC1100012037.hg.1	10.59	9.41	2.26	2.6e-05	0.0004	MAML2	mastermind-like transcriptional coactivator 2	Multiple_Complex
TC0X00008712.hg.1	7	4.75	4.75	1.36e-14	2.53e-12	MAMLD1	mastermind-like domain containing 1	Multiple_Complex
TC0100007412.hg.1	7.86	9.57	-3.26	2.32e-09	1.41e-07	MAN1C1	mannosidase, alpha, class 1C, member 1	Multiple_Complex
TC0300007437.hg.1	13.3	12.15	2.22	2.49e-08	1.16e-06	MANF	mesencephalic astrocyte-derived neurotrophic factor	Multiple_Complex
TC1200010806.hg.1	6.73	7.78	-2.08	7.83e-05	0.001	MAP3K12	mitogen-activated protein kinase kinase kinase 12	Multiple_Complex
TC1000007176.hg.1	11.62	9.76	3.62	1.54e-10	1.28e-08	MAP3K8	mitogen-activated protein kinase kinase kinase 8	Multiple_Complex
TC1900010612.hg.1	10.47	11.88	-2.65	4.71e-06	9.9e-05	MAP4K1	mitogen-activated protein kinase kinase kinase kinase 1	Multiple_Complex
TC0300007432.hg.1	10.69	9.3	2.63	9.49e-11	8.34e-09	MAPKAPK3	mitogen-activated protein kinase-activated protein kinase 3	Multiple_Complex
TC0600012293.hg.1	9.24	7.84	2.64	3.72e-09	2.11e-07	MB21D1	Mab-21 domain containing 1	Multiple_Complex
TC0200009601.hg.1	7.23	8.52	-2.45	1.87e-05	0.0003	MBD5	methyl-CpG binding domain protein 5	Multiple_Complex
TC0X00010837.hg.1	8.77	10.24	-2.77	1.38e-06	3.53e-05	MBNL3	muscleblind-like splicing regulator 3	Multiple_Complex
TC1700011131.hg.1	7.56	8.56	-2	5.79e-06	0.0001	MBTD1	mbt domain containing 1	Multiple_Complex
TC0700011969.hg.1	6.57	7.97	-2.64	2.33e-05	0.0004	MCM7	minichromosome maintenance complex component 7	Multiple_Complex
TC1000008005.hg.1	6.59	7.67	-2.11	0.0005	0.0045	MCU	mitochondrial calcium uniporter	Multiple_Complex
TC0700008857.hg.1	9.73	7.67	4.16	3.31e-11	3.14e-09	MDFIC	MyoD family inhibitor domain containing	Multiple_Complex
TC0X00007557.hg.1	10.65	11.89	-2.35	6.97e-06	0.0001	MED12	mediator complex subunit 12	Multiple_Complex
TC1200012815.hg.1	7.96	6.69	2.41	2.02e-07	6.78e-06	METTL1	methyltransferase like 1	Multiple_Complex
TC1200007626.hg.1	5.69	6.96	-2.42	0.0067	0.0362	METTL7A	methyltransferase like 7A	Coding
TC2200008654.hg.1	9.72	10.85	-2.18	0.0002	0.0024	MFNG	MFNG O-fucosylpeptide 3-beta-N-acetylglucosaminyltransferase	Multiple_Complex
TC0100007936.hg.1	6.1	4.84	2.4	3.79e-10	2.85e-08	MFSD2A	major facilitator superfamily domain containing 2A	Multiple_Complex
TC0800009266.hg.1	7.22	8.24	-2.02	0.0007	0.0065	MFSD3	major facilitator superfamily domain containing 3	Multiple_Complex
TC0400011815.hg.1	9.01	10.27	-2.4	2.29e-05	0.0004	MFSD8	major facilitator superfamily domain containing 8	Multiple_Complex
TC0200013595.hg.1	9.17	11.81	-6.24	1.32e-16	3.87e-14	MGAT4A	mannosyl (alpha-1,3-)-glycoprotein beta-1,4-N-acetylglucosaminyltransferase, isozyme A	Multiple_Complex
TC1400009709.hg.1	7.19	8.36	-2.25	2.22e-05	0.0004	MLH3	mutL homolog 3	Multiple_Complex
TC0900009679.hg.1	4.4	5.64	-2.37	0.0011	0.0086	MLLT3	Jeck2013 ALT_ACCEPTOR, ALT_DONOR, coding, INTERNAL, intronic best transcript NM_004529	NonCoding
TC0900009673.hg.1	13.16	14.24	-2.12	1.75e-08	8.41e-07	MLLT3	myeloid/lymphoid or mixed-lineage leukemia; translocated to, 3	Multiple_Complex
TC1200009196.hg.1	5.8	7.07	-2.41	9.79e-08	3.64e-06	MLXIP	MLX interacting protein	Multiple_Complex
TC0500010717.hg.1	6.99	8.35	-2.57	3.72e-07	1.14e-05	MOCS2	molybdenum cofactor synthesis 2	Multiple_Complex
TC1700006758.hg.1	8.77	7.4	2.58	3.61e-07	1.11e-05	MPDU1	mannose-P-dolichol utilization defect 1	Multiple_Complex
TC1000012536.hg.1	6.49	8.81	-5	3.33e-12	4.03e-10	MPP7	membrane protein, palmitoylated 7	Multiple_Complex
TC0100010514.hg.1	8.69	7.38	2.47	6.61e-08	2.62e-06	MPZL1	myelin protein zero-like 1	Multiple_Complex
TC0400006692.hg.1	10.91	11.92	-2.01	0.0004	0.0038	MRFAP1	Morf4 family associated protein 1	Multiple_Complex
TC1700012313.hg.1	8.84	7.53	2.47	1.07e-11	1.14e-09	MRPL12	mitochondrial ribosomal protein L12	Multiple_Complex
TC0800011633.hg.1	9.8	8.63	2.24	3.23e-06	7.3e-05	MRPL13	mitochondrial ribosomal protein L13	Multiple_Complex
TC0100016021.hg.1	10.17	8.97	2.29	1.25e-05	0.0002	MRPL24	mitochondrial ribosomal protein L24	Multiple_Complex
TC0300013270.hg.1	11.44	10.32	2.17	4.88e-07	1.43e-05	MRPL47	mitochondrial ribosomal protein L47	Multiple_Complex
TC0100017587.hg.1	10.91	12.04	-2.19	9.95e-05	0.0013	MRPL55	mitochondrial ribosomal protein L55	Multiple_Complex
TC0700013362.hg.1	9.95	8.72	2.35	2.13e-07	7.13e-06	MRPS17	mitochondrial ribosomal protein S17	Multiple_Complex
TC1700011233.hg.1	8.24	6.74	2.84	5.81e-07	1.67e-05	MRPS23	mitochondrial ribosomal protein S23	Multiple_Complex
TC0800012432.hg.1	10.3	9.05	2.38	1.15e-07	4.15e-06	MRPS28	mitochondrial ribosomal protein S28	Multiple_Complex
TC0100007160.hg.1	6.87	5.13	3.33	2.97e-14	5.27e-12	MRTO4	MRT4 homolog, ribosome maturation factor	Multiple_Complex
TC0300012527.hg.1	11.74	12.99	-2.38	4.04e-12	4.84e-10	MSL2	male-specific lethal 2 homolog (Drosophila)	Coding
TC0400009221.hg.1	12.53	10.9	3.1	3.23e-12	3.93e-10	MSMO1	methylsterol monooxygenase 1	Multiple_Complex
TC1600007957.hg.1	12.03	11.02	2	0.0019	0.0139	MT2A	metallothionein 2A	Multiple_Complex
TC1200011811.hg.1	8.28	9.32	-2.06	0.001	0.0083	MTERF2	mitochondrial transcription termination factor 2	Multiple_Complex
TC0200016344.hg.1	8.12	9.53	-2.66	0.0001	0.0014	MTERF4	mitochondrial transcription termination factor 4	Multiple_Complex
TC0600009851.hg.1	6.66	5.11	2.92	1.01e-09	6.7e-08	MTHFD1L	methylenetetrahydrofolate dehydrogenase (NADP+ dependent) 1-like	Multiple_Complex
TC0200008071.hg.1	8.21	7.06	2.22	4.48e-09	2.49e-07	MTHFD2	methylenetetrahydrofolate dehydrogenase (NADP+ dependent) 2, methenyltetrahydrofolate cyclohydrolase	Multiple_Complex
TC1300008439.hg.1	8.26	9.33	-2.1	6.46e-07	1.83e-05	MTIF3	mitochondrial translational initiation factor 3	Multiple_Complex
TC1300008720.hg.1	6.85	8.05	-2.28	3.01e-05	0.0005	MTRF1	mitochondrial translational release factor 1	Multiple_Complex
TC0100018304.hg.1	8.79	7.62	2.26	0.0015	0.0112	MTX1	metaxin 1	Multiple_Complex
TC0600011996.hg.1	6.07	7.22	-2.21	0.0023	0.0162	MUT	methylmalonyl-CoA mutase	Multiple_Complex
TC1900007325.hg.1	8.67	9.81	-2.21	1.04e-05	0.0002	MVB12A; BISPR	multivesicular body subunit 12A; BST2 interferon stimulated positive regulator (non-protein coding)	Multiple_Complex
TC0900008776.hg.1	11.41	12.8	-2.63	3.69e-08	1.62e-06	MVB12B	multivesicular body subunit 12B	Multiple_Complex
TC2100007208.hg.1	8.9	9.99	-2.13	0.0008	0.0066	MX1	MX dynamin-like GTPase 1	Multiple_Complex
TC2100007205.hg.1	7.49	8.66	-2.26	0.0003	0.0033	MX2	MX dynamin-like GTPase 2	Multiple_Complex
TC1000008881.hg.1	13.26	14.57	-2.48	2.68e-13	3.92e-11	MXI1	MAX interactor 1, dimerization protein	Multiple_Complex
TC0800008845.hg.1	10.49	7.96	5.81	1.22e-09	7.94e-08	MYC	v-myc avian myelocytomatosis viral oncogene homolog	Multiple_Complex
TC1900009357.hg.1	8.33	6.81	2.87	2.21e-07	7.36e-06	MYDGF	myeloid-derived growth factor	Multiple_Complex
TC0600007060.hg.1	9.84	11.83	-3.97	1.26e-08	6.25e-07	MYLIP; MIR4639	myosin regulatory light chain interacting protein; microRNA 4639	Multiple_Complex
TC1900009548.hg.1	9.89	12.35	-5.49	8.32e-05	0.0011	MYO1F	myosin IF	Multiple_Complex
TC1900006904.hg.1	6.85	7.94	-2.14	0.0006	0.0055	MYO1F	Memczak2013 ANTISENSE, CDS, coding, INTERNAL best transcript NM_012335	NonCoding
TC0700010941.hg.1	12.11	10.82	2.44	2.49e-08	1.16e-06	MYO1G	myosin IG	Multiple_Complex
TC1300010030.hg.1	14.84	16.41	-2.98	1.72e-05	0.0003	N4BP2L2	NEDD4 binding protein 2-like 2	Multiple_Complex
TC1900007125.hg.1	11.25	9.9	2.54	7.11e-10	4.92e-08	NACC1	nucleus accumbens associated 1, BEN and BTB (POZ) domain containing	Multiple_Complex
TC1100013061.hg.1	7.35	8.38	-2.04	9.81e-05	0.0012	NADSYN1	NAD synthetase 1	Multiple_Complex
TC0700012182.hg.1	10.3	7.19	8.64	2.3e-15	4.89e-13	NAMPT	nicotinamide phosphoribosyltransferase	Multiple_Complex
TC0400011298.hg.1	5.72	6.74	-2.02	0.0011	0.0089	NAP1L5	nucleosome assembly protein 1-like 5	Coding
TC1700009256.hg.1	9.5	10.93	-2.68	1.9e-08	9.1e-07	NARF	nuclear prelamin A recognition factor	Multiple_Complex
TC0100009770.hg.1	11.48	12.55	-2.1	3.45e-05	0.0005	NBPF12	neuroblastoma breakpoint family, member 12	Multiple_Complex
TC0100018285.hg.1	8.28	9.78	-2.83	4.11e-06	8.84e-05	NBPF19	neuroblastoma breakpoint family, member 19	Coding
TC0100018286.hg.1	10.66	11.84	-2.26	3.43e-05	0.0005	NBPF19	neuroblastoma breakpoint family, member 19	Coding
TC0100015580.hg.1	10.36	11.36	-2	9.36e-06	0.0002	NBPF20	neuroblastoma breakpoint family, member 20	Coding
TC0100015680.hg.1	7.32	8.55	-2.35	1.73e-06	4.29e-05	NBPF9	neuroblastoma breakpoint family, member 9	Multiple_Complex
TC0300011032.hg.1	8.46	9.51	-2.07	1.98e-07	6.67e-06	NCKIPSD	NCK interacting protein with SH3 domain	Multiple_Complex
TC0600011439.hg.1	7.99	6.93	2.09	5.75e-05	0.0008	NCR3	natural cytotoxicity triggering receptor 3	Multiple_Complex
TC1100006966.hg.1	7.8	5.97	3.56	3.04e-08	1.37e-06	NCR3LG1	natural killer cell cytotoxicity receptor 3 ligand 1	Multiple_Complex
TC0900008949.hg.1	10.44	5.91	23	1.12e-22	9.2e-20	NCS1	neuronal calcium sensor 1	Multiple_Complex
TC0M00006440.hg.1	10.04	11.13	-2.13	4.53e-06	9.58e-05	ND3	NADH dehydrogenase, subunit 3 (complex I)	Multiple_Complex
TC1300007592.hg.1	8.68	5.05	12.34	4.32e-30	1.85e-26	NDFIP2	Nedd4 family interacting protein 2	Multiple_Complex
TC2000009014.hg.1	9.47	11.01	-2.91	7.27e-11	6.55e-09	NDRG3	NDRG family member 3	Multiple_Complex
TC0500007542.hg.1	10.38	9.02	2.57	1.18e-08	5.9e-07	NDUFAF2	NADH dehydrogenase (ubiquinone) complex I, assembly factor 2	Multiple_Complex
TC0800012330.hg.1	5.74	7.12	-2.61	0.0003	0.0031	NDUFAF6	NADH dehydrogenase (ubiquinone) complex I, assembly factor 6	NonCoding
TC0600010810.hg.1	8.94	7.55	2.62	1.44e-05	0.0003	NEDD9	neural precursor cell expressed, developmentally down-regulated 9	Multiple_Complex
TC1200010490.hg.1	9.47	11.17	-3.25	4.29e-06	9.15e-05	NELL2	neural EGFL like 2	Multiple_Complex
TC1600010181.hg.1	8.55	6.77	3.43	5.75e-07	1.66e-05	NETO2	neuropilin (NRP) and tolloid (TLL)-like 2	Multiple_Complex
TC1600008231.hg.1	11.35	9.88	2.78	9.81e-07	2.62e-05	NFAT5	nuclear factor of activated T-cells 5, tonicity-responsive	Multiple_Complex
TC0100008517.hg.1	6.31	7.97	-3.16	5.95e-09	3.2e-07	NFIA	nuclear factor I/A	Multiple_Complex
TC0900010769.hg.1	11.68	9.27	5.31	4.59e-15	9.28e-13	NFIL3	nuclear factor, interleukin 3 regulated	Coding
TC0400008271.hg.1	9.7	7.76	3.85	1.31e-13	2.03e-11	NFKB1	nuclear factor of kappa light polypeptide gene enhancer in B-cells 1	Multiple_Complex
TC1400008940.hg.1	12.51	10.57	3.82	1.62e-11	1.65e-09	NFKBIA	nuclear factor of kappa light polypeptide gene enhancer in B-cells inhibitor, alpha	Multiple_Complex
TC1900010502.hg.1	8.05	6.19	3.62	8.47e-08	3.23e-06	NFKBID	nuclear factor of kappa light polypeptide gene enhancer in B-cells inhibitor, delta	Multiple_Complex
TC0X00008002.hg.1	8.03	9.54	-2.83	1.15e-05	0.0002	NGFRAP1	nerve growth factor receptor (TNFRSF16) associated protein 1	Multiple_Complex
TC0X00011305.hg.1	3.51	5.15	-3.13	2.01e-06	4.86e-05	NHSL2	NHS-like 2	Multiple_Complex
TC0200014108.hg.1	11.44	10.37	2.09	1.57e-05	0.0003	NIFK	nucleolar protein interacting with the FHA domain of MKI67	Multiple_Complex
TC0100007365.hg.1	6.25	7.53	-2.43	7.62e-08	2.96e-06	NIPAL3	NIPA-like domain containing 3	Multiple_Complex
TC0300007165.hg.1	11.94	13.32	-2.6	0.0026	0.0177	NKTR	natural killer cell triggering receptor	Multiple_Complex
TC1600009198.hg.1	7.76	9.39	-3.08	4.15e-08	1.79e-06	NLRC3	NLR family, CARD domain containing 3	Multiple_Complex
TC1600007986.hg.1	10.21	11.82	-3.05	0.0004	0.0043	NLRC5	NLR family, CARD domain containing 5	Multiple_Complex
TC1700009566.hg.1	8	10.36	-5.13	1.52e-10	1.27e-08	NLRP1	NLR family, pyrin domain containing 1	Multiple_Complex
TC1700008282.hg.1	13.65	12.07	2.99	1.36e-08	6.6e-07	NME1; NME1-NME2; NME2	NME/NM23 nucleoside diphosphate kinase 1; NME1-NME2 readthrough; NME/NM23 nucleoside diphosphate kinase 2	Multiple_Complex
TC0900010445.hg.1	10.75	12.14	-2.62	1.04e-06	2.74e-05	NMRK1	nicotinamide riboside kinase 1	Multiple_Complex
TC2000008852.hg.1	7.73	8.78	-2.08	2.7e-05	0.0004	NOL4L	nucleolar protein 4-like	Multiple_Complex
TC1600009608.hg.1	10.61	9.59	2.03	3.59e-06	7.97e-05	NOMO2	NODAL modulator 2	Multiple_Complex
TC0500012937.hg.1	11.62	8.88	6.72	4.56e-18	1.92e-15	NOP16	NOP16 nucleolar protein	Multiple_Complex
TC2000006518.hg.1	12.57	11.5	2.1	2.71e-07	8.72e-06	NOP56; SNORD57; SNORD56; SNORA51; SNORD110; SNORD86; MIR1292	NOP56 ribonucleoprotein; small nucleolar RNA, C/D box 57; small nucleolar RNA, C/D box 56; small nucleolar RNA, H/ACA box 51; small nucleolar RNA, C/D box 110; small nucleolar RNA, C/D box 86; microRNA 1292	Multiple_Complex
TC0100018479.hg.1	9.02	10.22	-2.29	1.22e-05	0.0002	NOTCH2NL	notch 2 N-terminal like	Multiple_Complex
TC0300014050.hg.1	7.24	8.43	-2.28	0.0013	0.01	NPHP3	nephronophthisis 3 (adolescent)	Multiple_Complex
TC0300014048.hg.1	5.6	6.63	-2.05	4.55e-05	0.0007	NPHP3-ACAD11	NPHP3-ACAD11 readthrough (NMD candidate)	Multiple_Complex
TC1600011354.hg.1	11.17	12.48	-2.47	0.002	0.014	NPIPA2	nuclear pore complex interacting protein family, member A2	Coding
TC1600011353.hg.1	11.24	12.46	-2.33	0.0017	0.0127	NPIPA3	nuclear pore complex interacting protein family, member A3	Multiple_Complex
TC1600009524.hg.1	11.56	12.93	-2.58	0.0006	0.0057	NPIPA5	nuclear pore complex interacting protein family, member A5	Coding
TC1600007030.hg.1	10.67	11.7	-2.03	0.0008	0.0069	NPIPA7; NPIPA8; PKD1P1	nuclear pore complex interacting protein family, member A7; nuclear pore complex interacting protein family, member A8; polycystic kidney disease 1 (autosomal dominant) pseudogene 1	Multiple_Complex
TC1600011487.hg.1	12.01	13.36	-2.56	0.0017	0.0125	NPIPA8	nuclear pore complex interacting protein family, member A8	Coding
TC1000011658.hg.1	9.62	7.83	3.45	2.37e-10	1.86e-08	NPM3	nucleophosmin/nucleoplasmin 3	Multiple_Complex
TC1600010732.hg.1	5.66	4.58	2.12	0.0001	0.0015	NQO1	NAD(P)H dehydrogenase, quinone 1	Multiple_Complex
TC0300006847.hg.1	7.27	8.88	-3.05	3.77e-08	1.65e-06	NR1D2	nuclear receptor subfamily 1, group D, member 2	Multiple_Complex
TC0300006694.hg.1	10.79	11.9	-2.16	1.88e-05	0.0003	NR2C2	nuclear receptor subfamily 2, group C, member 2	Multiple_Complex
TC0400012078.hg.1	6.58	8.48	-3.74	4.83e-10	3.49e-08	NR3C2	nuclear receptor subfamily 3, group C, member 2	Multiple_Complex
TC1200007653.hg.1	10.44	6.62	14.06	3.24e-17	1.07e-14	NR4A1	nuclear receptor subfamily 4, group A, member 1	Multiple_Complex
TC0200014672.hg.1	10.63	7.81	7.07	1.77e-07	6.03e-06	NR4A2	nuclear receptor subfamily 4, group A, member 2	Multiple_Complex
TC0900008219.hg.1	10.44	5.14	39.43	2.49e-20	1.62e-17	NR4A3	nuclear receptor subfamily 4, group A, member 3	Multiple_Complex
TC0700013391.hg.1	7.99	9.1	-2.15	0.0095	0.0472	NSUN5P1	NOP2/Sun domain family, member 5 pseudogene 1	Multiple_Complex
TC0600009228.hg.1	5.86	7.26	-2.64	0.0002	0.0027	NT5DC1	5-nucleotidase domain containing 1	Multiple_Complex
TC0300011173.hg.1	9.6	8.2	2.63	0.0008	0.0066	NT5DC2	5-nucleotidase domain containing 2	Multiple_Complex
TC1100011539.hg.1	7.66	8.95	-2.45	4.62e-06	9.76e-05	NUMA1	nuclear mitotic apparatus protein 1	Multiple_Complex
TC0900011668.hg.1	11.47	10.45	2.02	0.0062	0.0343	NUP188	Memczak2013 ANTISENSE, coding, INTERNAL, UTR3 best transcript NM_015354	NonCoding
TC0300010329.hg.1	10.2	11.4	-2.3	1.32e-05	0.0002	NUP210	nucleoporin 210kDa	Multiple_Complex
TC0600009261.hg.1	10.89	9.82	2.1	3.03e-05	0.0005	NUS1	NUS1 dehydrodolichyl diphosphate synthase subunit	Multiple_Complex
TC1200012708.hg.1	6.48	7.95	-2.78	0.0015	0.0112	OAS1	2-5-oligoadenylate synthetase 1	Multiple_Complex
TC0100014794.hg.1	11.08	12.5	-2.66	0.0009	0.0078	ODF2L	outer dense fiber of sperm tails 2-like	Multiple_Complex
TC0X00006658.hg.1	12.43	14	-2.98	0.0019	0.0139	OFD1	oral-facial-digital syndrome 1	Multiple_Complex
TC0100017947.hg.1	4.79	5.88	-2.13	7.19e-05	0.001	OPN3	opsin 3	Multiple_Complex
TC0200015401.hg.1	7.5	8.51	-2.01	2.22e-05	0.0004	ORC2	origin recognition complex subunit 2	Multiple_Complex
TC0700012131.hg.1	9.07	10.12	-2.07	0.0011	0.0086	ORC5	origin recognition complex subunit 5	Multiple_Complex
TC1200007810.hg.1	11.38	10.04	2.53	9.25e-08	3.48e-06	ORMDL2	ORMDL sphingolipid biosynthesis regulator 2	Multiple_Complex
TC2000009953.hg.1	11.16	12.23	-2.1	7.63e-06	0.0001	OSBPL2	oxysterol binding protein-like 2	Multiple_Complex
TC0700010504.hg.1	9.45	7.42	4.09	3.07e-12	3.76e-10	OSBPL3	oxysterol binding protein-like 3	Multiple_Complex
TC1700010959.hg.1	5.68	7	-2.49	0.0004	0.0038	OSBPL7	oxysterol binding protein-like 7	Multiple_Complex
TC0500010599.hg.1	10	8.58	2.66	1.98e-05	0.0003	OXCT1	3-oxoacid CoA-transferase 1	Multiple_Complex
TC0300012813.hg.1	7.14	5.98	2.23	0.0017	0.0129	P2RY14	purinergic receptor P2Y, G-protein coupled, 14	Coding
TC0800012444.hg.1	10.18	11.63	-2.71	0.0002	0.002	PABPC1; MIR7705	poly(A) binding protein, cytoplasmic 1; microRNA 7705	Multiple_Complex
TC1100008054.hg.1	10.47	11.56	-2.13	1.68e-07	5.82e-06	PACS1	phosphofurin acidic cluster sorting protein 1	Multiple_Complex
TC0600006926.hg.1	9.15	7.74	2.66	1.97e-07	6.66e-06	PAK1IP1	PAK1 interacting protein 1	Multiple_Complex
TC0500008229.hg.1	9.97	8.88	2.13	1.9e-05	0.0003	PAM	peptidylglycine alpha-amidating monooxygenase	Multiple_Complex
TC1200012802.hg.1	6.76	8.57	-3.52	3.17e-09	1.86e-07	PAN2; CNPY2	PAN2 poly(A) specific ribonuclease subunit; canopy FGF signaling regulator 2	Multiple_Complex
TC2000009886.hg.1	8.35	9.8	-2.72	0.0002	0.002	PANK2	pantothenate kinase 2	NonCoding
TC1600007811.hg.1	9.7	10.74	-2.05	3.59e-06	7.97e-05	PAPD5	PAP associated domain containing 5	Multiple_Complex
TC0100006729.hg.1	16.72	14.92	3.48	7.7e-16	1.81e-13	PARK7	parkinson protein 7	Multiple_Complex
TC0300008559.hg.1	10.82	11.99	-2.25	0.003	0.0198	PARP15	poly(ADP-ribose) polymerase family member 15	Multiple_Complex
TC1500010877.hg.1	4.79	5.82	-2.05	1.95e-05	0.0003	PARP16	poly(ADP-ribose) polymerase family member 16	Multiple_Complex
TC1300008359.hg.1	7.75	9.17	-2.67	0.0022	0.0155	PARP4	poly(ADP-ribose) polymerase family member 4	Multiple_Complex
TC0500010680.hg.1	10.98	12.12	-2.2	8.08e-05	0.0011	PARP8	Memczak2013 ANTISENSE, CDS, coding, INTERNAL, intronic best transcript NM_001178056	NonCoding
TC2200007574.hg.1	6.57	5.47	2.14	2.53e-05	0.0004	PARVB	parvin, beta	Multiple_Complex
TC1500009263.hg.1	8.35	10.39	-4.12	7.67e-08	2.98e-06	PATL2	protein associated with topoisomerase II homolog 2 (yeast)	Multiple_Complex
TC2200008477.hg.1	9.15	10.4	-2.37	4.68e-09	2.59e-07	PATZ1	POZ (BTB) and AT hook containing zinc finger 1	Multiple_Complex
TC0900008763.hg.1	7.15	8.15	-2	9.44e-06	0.0002	PBX3	pre-B-cell leukemia homeobox 3	Multiple_Complex
TC1900010067.hg.1	10.3	8.92	2.6	3.76e-06	8.22e-05	PBX4	pre-B-cell leukemia homeobox 4	Multiple_Complex
TC1000010930.hg.1	9.16	8.09	2.09	3.18e-08	1.41e-06	PCBD1	pterin-4 alpha-carbinolamine dehydratase/dimerization cofactor of hepatocyte nuclear factor 1 alpha	Multiple_Complex
TC2000008200.hg.1	9.33	10.77	-2.71	4.56e-08	1.93e-06	PCED1A	PC-esterase domain containing 1A	Multiple_Complex
TC1100008626.hg.1	12.56	13.88	-2.5	4.65e-06	9.8e-05	PCF11	PCF11 cleavage and polyadenylation factor subunit	Multiple_Complex
TC2000009956.hg.1	7.59	9.99	-5.27	1.19e-13	1.87e-11	PCMTD2	protein-L-isoaspartate (D-aspartate) O-methyltransferase domain containing 2	Multiple_Complex
TC0100017761.hg.1	10.07	11.41	-2.53	3.02e-08	1.36e-06	PCNXL2	pecanex-like 2 (Drosophila)	Multiple_Complex
TC1100012444.hg.1	9.43	10.84	-2.65	8.25e-06	0.0002	PCSK7	proprotein convertase subtilisin/kexin type 7	Multiple_Complex
TC1000008904.hg.1	9.16	10.84	-3.2	1.03e-11	1.11e-09	PDCD4; MIR4680	programmed cell death 4 (neoplastic transformation inhibitor); microRNA 4680	Multiple_Complex
TC1100006923.hg.1	8.72	10.98	-4.79	6.42e-12	7.29e-10	PDE3B	phosphodiesterase 3B, cGMP-inhibited	Multiple_Complex
TC1100006925.hg.1	6.17	7.34	-2.25	7.34e-05	0.001	PDE3B	phosphodiesterase 3B, cGMP-inhibited	NonCoding
TC1900006985.hg.1	6.93	5.88	2.07	3.8e-06	8.29e-05	PDE4A	phosphodiesterase 4A, cAMP-specific	Multiple_Complex
TC0100008625.hg.1	11.91	10.82	2.14	1.29e-05	0.0002	PDE4B	phosphodiesterase 4B, cAMP-specific	Multiple_Complex
TC0500010842.hg.1	11	12.41	-2.66	0.0004	0.0039	PDE4D	phosphodiesterase 4D, cAMP-specific	Multiple_Complex
TC0800010667.hg.1	6.07	7.15	-2.11	0.0011	0.0088	PDE7A	phosphodiesterase 7A	Multiple_Complex
TC0700009977.hg.1	5.79	3.57	4.66	5.33e-15	1.07e-12	PDGFA	platelet-derived growth factor alpha polypeptide	Multiple_Complex
TC0200011731.hg.1	12.42	11.26	2.23	5.77e-08	2.33e-06	PDIA6	protein disulfide isomerase family A, member 6	Multiple_Complex
TC0200009978.hg.1	8.37	9.58	-2.33	2.49e-05	0.0004	PDK1	pyruvate dehydrogenase kinase, isozyme 1	Multiple_Complex
TC0100010284.hg.1	12.08	10.74	2.54	7.66e-16	1.81e-13	PEA15	phosphoprotein enriched in astrocytes 15	Multiple_Complex
TC1700011442.hg.1	7.49	9.28	-3.44	1.59e-06	4e-05	PECAM1	platelet/endothelial cell adhesion molecule 1	Multiple_Complex
TC1700012353.hg.1	6.21	7.5	-2.43	2.45e-05	0.0004	PER1; MIR6883	period circadian clock 1; microRNA 6883	Multiple_Complex
TC1700006804.hg.1	8.09	7.06	2.04	9.3e-05	0.0012	PFAS	phosphoribosylformylglycinamidine synthase	Multiple_Complex
TC0300013970.hg.1	9.04	10.14	-2.16	0.0003	0.003	PFKFB4; MIR6823	6-phosphofructo-2-kinase/fructose-2,6-biphosphatase 4; microRNA 6823	Multiple_Complex
TC1700011045.hg.1	15.75	14.4	2.54	6.21e-10	4.35e-08	PHB	prohibitin	Multiple_Complex
TC0300013090.hg.1	12.85	14.32	-2.76	1.99e-13	2.97e-11	PHC3	polyhomeotic homolog 3 (Drosophila)	Multiple_Complex
TC0600014374.hg.1	11.99	13.12	-2.19	0.0005	0.0044	PHF10	PHD finger protein 10	Multiple_Complex
TC1700010222.hg.1	12.23	13.41	-2.26	1.68e-09	1.06e-07	PHF12	PHD finger protein 12	Multiple_Complex
TC0900011388.hg.1	8.58	9.76	-2.27	4.59e-08	1.94e-06	PHF19	PHD finger protein 19	Multiple_Complex
TC1100010688.hg.1	11.49	12.76	-2.42	9.78e-07	2.62e-05	PHF21A	PHD finger protein 21A	Multiple_Complex
TC0600014143.hg.1	10.54	11.78	-2.36	1.12e-05	0.0002	PHF3	PHD finger protein 3	Multiple_Complex
TC1600011384.hg.1	5.69	7.13	-2.71	2.82e-07	8.99e-06	PHKG2	phosphorylase kinase, gamma 2 (testis)	Multiple_Complex
TC1200011310.hg.1	10.87	8.55	4.99	4.94e-21	3.42e-18	PHLDA1	pleckstrin homology-like domain, family A, member 1	Multiple_Complex
TC1100009212.hg.1	6.51	5.34	2.25	7.59e-08	2.96e-06	PHLDB1; MIR6716	pleckstrin homology-like domain, family B, member 1; microRNA 6716	Multiple_Complex
TC2200008055.hg.1	10.4	11.67	-2.42	0.0014	0.0109	PI4KA	phosphatidylinositol 4-kinase, catalytic, alpha	Multiple_Complex
TC2200008091.hg.1	7.82	8.84	-2.04	9.81e-06	0.0002	PI4KAP2	phosphatidylinositol 4-kinase, catalytic, alpha pseudogene 2	Multiple_Complex
TC1000011524.hg.1	10.46	9.29	2.25	1.05e-07	3.85e-06	PIK3AP1	phosphoinositide-3-kinase adaptor protein 1	Multiple_Complex
TC2200008475.hg.1	11.98	13.99	-4.04	5.6e-15	1.1e-12	PIK3IP1	phosphoinositide-3-kinase interacting protein 1	Multiple_Complex
TC0500007641.hg.1	11.45	13.15	-3.25	0.0021	0.0147	PIK3R1	phosphoinositide-3-kinase, regulatory subunit 1 (alpha)	Multiple_Complex
TC1700009707.hg.1	6.41	5.24	2.25	7.58e-05	0.001	PIK3R6	phosphoinositide-3-kinase, regulatory subunit 6	Multiple_Complex
TC0200010624.hg.1	6.51	7.84	-2.51	3.43e-05	0.0005	PIKFYVE	phosphoinositide kinase, FYVE finger containing	Multiple_Complex
TC1700010545.hg.1	6.97	8.04	-2.09	6.17e-06	0.0001	PIP4K2B	phosphatidylinositol-5-phosphate 4-kinase, type II, beta	Multiple_Complex
TC1700008690.hg.1	10.42	11.7	-2.42	8.85e-09	4.54e-07	PITPNC1	phosphatidylinositol transfer protein, cytoplasmic 1	Multiple_Complex
TC1000009589.hg.1	10.91	9.56	2.56	2.29e-08	1.07e-06	PITRM1	pitrilysin metallopeptidase 1	Multiple_Complex
TC0400011192.hg.1	13.12	15.9	-6.87	2.14e-25	2.7e-22	PLAC8	placenta specific 8	Multiple_Complex
TC2000008845.hg.1	11.51	9.64	3.65	3.07e-16	8.44e-14	PLAGL2	pleiomorphic adenoma gene-like 2	Coding
TC2000009887.hg.1	7.53	6.49	2.05	0.0024	0.0164	PLCB1	phospholipase C, beta 1 (phosphoinositide-specific)	Multiple_Complex
TC1500009089.hg.1	5.92	7.34	-2.67	0.0004	0.0043	PLCB2	phospholipase C, beta 2	Multiple_Complex
TC1900008103.hg.1	7.43	8.59	-2.23	1.98e-07	6.67e-06	PLD3	phospholipase D family, member 3	Multiple_Complex
TC1900007679.hg.1	7.79	9.8	-4.03	6.41e-09	3.4e-07	PLEKHF1	pleckstrin homology domain containing, family F (with FYVE domain) member 1	Coding
TC0600009843.hg.1	6.74	5.28	2.75	7.25e-11	6.55e-09	PLEKHG1	pleckstrin homology domain containing, family G (with RhoGef domain) member 1	Multiple_Complex
TC0200013330.hg.1	6.73	7.79	-2.09	0.0002	0.0021	PLGLB1; PLGLB2	plasminogen-like B1; plasminogen-like B2	Multiple_Complex
TC0300012397.hg.1	6.22	8.14	-3.8	2.47e-05	0.0004	PLXND1	plexin D1	Multiple_Complex
TC1800007471.hg.1	7.63	5.38	4.74	3.89e-10	2.92e-08	PMAIP1	phorbol-12-myristate-13-acetate-induced protein 1	Multiple_Complex
TC2000009604.hg.1	11.36	9.45	3.75	3.83e-06	8.34e-05	PMEPA1	prostate transmembrane protein, androgen induced 1	Multiple_Complex
TC1700009850.hg.1	6.16	4.99	2.26	6.95e-06	0.0001	PMP22	peripheral myelin protein 22	Multiple_Complex
TC0700011554.hg.1	13.45	14.65	-2.29	5.59e-06	0.0001	PMS2P3	PMS1 homolog 2, mismatch repair system component pseudogene 3	Multiple_Complex
TC1400006970.hg.1	9.66	10.7	-2.05	0.0006	0.0057	PNN	pinin, desmosome associated protein	Multiple_Complex
TC0200007886.hg.1	7.86	6.53	2.5	7.08e-06	0.0001	PNO1	partner of NOB1 homolog	Multiple_Complex
TC0700010910.hg.1	9.15	7.79	2.56	1.02e-06	2.69e-05	POLD2	polymerase (DNA directed), delta 2, accessory subunit	Multiple_Complex
TC0600008099.hg.1	9.25	10.41	-2.24	0.0001	0.0015	POLH	polymerase (DNA directed), eta	Multiple_Complex
TC1800007354.hg.1	6.18	7.71	-2.89	1.72e-07	5.92e-06	POLI	polymerase (DNA directed) iota	Multiple_Complex
TC1100009707.hg.1	11.64	10.29	2.54	4.2e-06	9e-05	POLR2L	polymerase (RNA) II (DNA directed) polypeptide L, 7.6kDa	Coding
TC1000010914.hg.1	9.62	8.61	2.02	0.001	0.0081	PPA1	pyrophosphatase (inorganic) 1	Multiple_Complex
TC0100011243.hg.1	6.7	7.96	-2.41	0.0002	0.0018	PPFIA4	protein tyrosine phosphatase, receptor type, f polypeptide (PTPRF), interacting protein (liprin), alpha 4	Multiple_Complex
TC0100009858.hg.1	8.19	9.46	-2.41	6.35e-07	1.81e-05	PPIAL4C	peptidylprolyl isomerase A (cyclophilin A)-like 4C	Coding
TC0100015558.hg.1	6.88	8.22	-2.53	2.81e-07	8.98e-06	PPIAL4E	peptidylprolyl isomerase A (cyclophilin A)-like 4E	Coding
TC0100015577.hg.1	7.09	8.81	-3.29	5.32e-08	2.18e-06	PPIAL4F; PPIAL4D	peptidylprolyl isomerase A (cyclophilin A)-like 4F; peptidylprolyl isomerase A (cyclophilin A)-like 4D	Coding
TC0600011674.hg.1	7.93	6.57	2.55	7.92e-08	3.06e-06	PPIL1	peptidylprolyl isomerase (cyclophilin)-like 1	Multiple_Complex
TC0100011219.hg.1	7.3	8.85	-2.94	2.75e-06	6.34e-05	PPP1R12B	protein phosphatase 1, regulatory subunit 12B	Multiple_Complex
TC1100011157.hg.1	13.5	12.37	2.19	0.0005	0.0044	PPP1R14B	protein phosphatase 1, regulatory (inhibitor) subunit 14B	Multiple_Complex
TC1400010717.hg.1	6.65	8.49	-3.59	2.26e-11	2.21e-09	PPP1R3E	protein phosphatase 1, regulatory subunit 3E	Multiple_Complex
TC0100014014.hg.1	13.5	11.19	4.96	7.47e-18	2.81e-15	PRDX1	peroxiredoxin 1	Multiple_Complex
TC0X00006794.hg.1	9.81	8.46	2.53	8.4e-12	9.19e-10	PRDX4	peroxiredoxin 4	Multiple_Complex
TC1000010925.hg.1	13.66	11.77	3.7	3.47e-13	4.96e-11	PRF1	perforin 1 (pore forming protein)	Multiple_Complex
TC0100008874.hg.1	9.57	10.8	-2.35	5.4e-06	0.0001	PRKACB	protein kinase, cAMP-dependent, catalytic, beta	Multiple_Complex
TC1900007031.hg.1	10.84	11.97	-2.19	2.43e-06	5.73e-05	PRKCSH	protein kinase C substrate 80K-H	Multiple_Complex
TC1900011781.hg.1	11.72	10.43	2.44	5.72e-10	4.06e-08	PRMT1	protein arginine methyltransferase 1	Multiple_Complex
TC2000006576.hg.1	11.9	10.71	2.29	2.62e-09	1.58e-07	PRNP	prion protein	Multiple_Complex
TC1700011795.hg.1	7.64	9.08	-2.73	2.3e-07	7.6e-06	PRPSAP1	phosphoribosyl pyrophosphate synthetase-associated protein 1	Multiple_Complex
TC1900008547.hg.1	7.5	9.14	-3.11	2.05e-05	0.0003	PRR12	proline rich 12	Multiple_Complex
TC0900012184.hg.1	7.79	8.88	-2.13	0.0026	0.0176	PRRC2B	proline-rich coiled-coil 2B	Multiple_Complex
TC1100007216.hg.1	5.33	4.31	2.03	0.0002	0.0021	PRRG4	proline rich Gla (G-carboxyglutamic acid) 4 (transmembrane)	Multiple_Complex
TC0900007667.hg.1	8.55	6.65	3.73	1.82e-15	3.94e-13	PSAT1	phosphoserine aminotransferase 1	Multiple_Complex
TC0700013544.hg.1	14.11	13.03	2.11	1.72e-07	5.92e-06	PSMA2	proteasome subunit alpha 2	Multiple_Complex
TC1400007300.hg.1	13.87	12.86	2.02	3.78e-06	8.26e-05	PSMA3	proteasome subunit alpha 3	Multiple_Complex
TC0100013696.hg.1	12.34	11.33	2.01	5.5e-09	2.99e-07	PSMB2	proteasome subunit beta 2	Multiple_Complex
TC1700007720.hg.1	15.07	14.02	2.06	1.07e-09	7.02e-08	PSMB3	proteasome subunit beta 3	Multiple_Complex
TC1700006644.hg.1	13.14	11.71	2.7	1.76e-09	1.1e-07	PSMB6	proteasome subunit beta 6	Multiple_Complex
TC1900008084.hg.1	9.79	8.66	2.19	9.46e-06	0.0002	PSMC4	proteasome 26S subunit, ATPase 4	Multiple_Complex
TC1700007519.hg.1	10.1	8.96	2.21	2.73e-08	1.26e-06	PSMD11	proteasome 26S subunit, non-ATPase 11	Multiple_Complex
TC1100006441.hg.1	11.84	10.57	2.4	1.46e-10	1.22e-08	PSMD13	proteasome 26S subunit, non-ATPase 13	Multiple_Complex
TC0200009813.hg.1	10.83	9.31	2.86	8.48e-08	3.23e-06	PSMD14	proteasome 26S subunit, non-ATPase 14	Multiple_Complex
TC1400007161.hg.1	6.07	7.14	-2.11	0.0028	0.0185	PTGDR	prostaglandin D2 receptor (DP)	Coding
TC1200006643.hg.1	9.13	8.12	2.01	7.05e-09	3.71e-07	PTMS	parathymosin	Multiple_Complex
TC1100013193.hg.1	12.52	13.71	-2.27	1.04e-11	1.11e-09	PTPRCAP	protein tyrosine phosphatase, receptor type, C-associated protein	Multiple_Complex
TC0900009404.hg.1	11.15	9.74	2.65	0.0003	0.0029	PUM3	pumilio RNA binding family member 3	Multiple_Complex
TC0700013426.hg.1	9.63	11.49	-3.62	3.74e-19	1.87e-16	PVRIG	poliovirus receptor related immunoglobulin domain containing	Multiple_Complex
TC0300008316.hg.1	8.28	7.27	2	7.61e-05	0.001	PVRL3	poliovirus receptor-related 3	Multiple_Complex
TC1700012484.hg.1	6.05	4.71	2.53	1.32e-13	2.03e-11	PYCR1	pyrroline-5-carboxylate reductase 1	Multiple_Complex
TC0100018496.hg.1	10.33	11.35	-2.03	1.51e-07	5.28e-06	PYGO2	pygopus family PHD finger 2	Coding
TC1200012808.hg.1	11.02	12.53	-2.85	1.05e-07	3.85e-06	R3HDM2	R3H domain containing 2	Multiple_Complex
TC0800010138.hg.1	8.53	7.29	2.36	1.69e-08	8.16e-07	RAB11FIP1	RAB11 family interacting protein 1 (class I)	Multiple_Complex
TC0100015895.hg.1	6.17	7.3	-2.18	4.27e-06	9.12e-05	RAB13	RAB13, member RAS oncogene family	Multiple_Complex
TC1400007511.hg.1	7.37	8.81	-2.73	1.16e-07	4.17e-06	RAD51B	RAD51 paralog B	Multiple_Complex
TC1400007514.hg.1	6.76	8.12	-2.56	2.41e-05	0.0004	RAD51B	Jeck2013 ALT_ACCEPTOR, ALT_DONOR, coding, INTERNAL, intronic best transcript NM_133509	NonCoding
TC1200009416.hg.1	14.95	13.56	2.63	8.95e-10	6.08e-08	RAN	RAN, member RAS oncogene family	Multiple_Complex
TC2200006641.hg.1	9.77	8	3.41	7.62e-16	1.81e-13	RANBP1	RAN binding protein 1	Multiple_Complex
TC0300009229.hg.1	7.91	8.95	-2.06	5.05e-08	2.1e-06	RAP2B	RAP2B, member of RAS oncogene family	Coding
TC1100007899.hg.1	13.96	15.6	-3.11	6.52e-17	2.03e-14	RARRES3	retinoic acid receptor responder (tazarotene induced) 3	Multiple_Complex
TC1300009933.hg.1	9.95	11.67	-3.31	2.32e-14	4.14e-12	RASA3	RAS p21 protein activator 3	Multiple_Complex
TSUnmapped00000531.hg.1	9.71	11.27	-2.96	5.8e-12	6.72e-10	RASA3	RAS p21 protein activator 3	Coding
TC0700013601.hg.1	5.62	6.78	-2.24	9.88e-08	3.67e-06	RASA4B; RASA4	RAS p21 protein activator 4B; RAS p21 protein activator 4	Multiple_Complex
TC1900009872.hg.1	9.55	10.77	-2.33	0.0005	0.0049	RASAL3	RAS protein activator like 3	Multiple_Complex
TC0500007925.hg.1	6.67	7.77	-2.14	0.0022	0.0152	RASGRF2	Ras protein-specific guanine nucleotide-releasing factor 2	Multiple_Complex
TC1500009056.hg.1	11.73	13.03	-2.46	0.0001	0.0017	RASGRP1	RAS guanyl releasing protein 1 (calcium and DAG-regulated)	Multiple_Complex
TC1100011180.hg.1	4.87	6.37	-2.83	1.52e-09	9.66e-08	RASGRP2	RAS guanyl releasing protein 2 (calcium and DAG-regulated)	Multiple_Complex
TC1100006475.hg.1	7.05	8.08	-2.04	0.0007	0.0063	RASSF7	Ras association (RalGDS/AF-6) domain family (N-terminal) member 7	Multiple_Complex
TC1800009221.hg.1	7.25	5.51	3.34	3.17e-08	1.41e-06	RBBP8; MIR4741	retinoblastoma binding protein 8; microRNA 4741	Multiple_Complex
TC1600007887.hg.1	7.56	9.38	-3.53	4.46e-11	4.14e-09	RBL2	retinoblastoma-like 2	Multiple_Complex
TC0800011116.hg.1	4.14	5.16	-2.02	0.0004	0.0043	RBM12B	RNA binding motif protein 12B	Multiple_Complex
TC1400008683.hg.1	9.15	10.99	-3.56	3.76e-05	0.0006	RBM23	RNA binding motif protein 23	Multiple_Complex
TC0X00007195.hg.1	8.96	7.78	2.25	5.18e-10	3.71e-08	RBM3	RNA binding motif (RNP1, RRM) protein 3	Multiple_Complex
TC0X00010462.hg.1	7.05	8.24	-2.27	1.96e-05	0.0003	RBM41	RNA binding motif protein 41	Multiple_Complex
TC0700008328.hg.1	7.04	8.19	-2.23	0.0001	0.0013	RBM48	RNA binding motif protein 48	Coding
TC0300013829.hg.1	12.77	13.83	-2.08	9.06e-05	0.0012	RBM5	RNA binding motif protein 5	Multiple_Complex
TC0800007957.hg.1	7.83	6.46	2.58	5.2e-08	2.15e-06	RDH10	retinol dehydrogenase 10 (all-trans)	Multiple_Complex
TC0200016452.hg.1	13.62	12.06	2.95	3.71e-10	2.82e-08	REL	v-rel avian reticuloendotheliosis viral oncogene homolog	Multiple_Complex
TC0200016484.hg.1	8.15	9.5	-2.56	0.0063	0.0349	RGPD2; RGPD1	RANBP2-like and GRIP domain containing 2; RANBP2-like and GRIP domain containing 1	Multiple_Complex
TC0100011012.hg.1	11.43	8.61	7.07	2.81e-10	2.18e-08	RGS1	regulator of G-protein signaling 1	Multiple_Complex
TC0100016631.hg.1	10.07	5.47	24.3	3.82e-28	1.17e-24	RGS16	regulator of G-protein signaling 16	Coding
TC1600006485.hg.1	8.56	9.88	-2.5	0.0057	0.0322	RHOT2	ras homolog family member T2	Multiple_Complex
TC0500010549.hg.1	9.01	10.04	-2.04	0.001	0.0081	RICTOR	RPTOR independent companion of MTOR, complex 2	Multiple_Complex
TC0200016544.hg.1	6.44	7.72	-2.43	0.0009	0.0077	RIF1	replication timing regulatory factor 1	NonCoding
TC1200012270.hg.1	10.36	9.34	2.03	1.33e-07	4.71e-06	RILPL2	Rab interacting lysosomal protein-like 2	Multiple_Complex
TC0500011529.hg.1	6.27	7.34	-2.11	0.0007	0.0064	RIOK2	RIO kinase 2	Multiple_Complex
TC1900007098.hg.1	8.35	7.31	2.05	0.0003	0.0035	RNASEH2A	ribonuclease H2, subunit A	Multiple_Complex
TC0600014371.hg.1	10.64	12.52	-3.69	1.79e-09	1.11e-07	RNASET2	ribonuclease T2	Multiple_Complex
TC0X00010653.hg.1	8.36	9.43	-2.1	1.94e-05	0.0003	RNF113A	ring finger protein 113A	Coding
TC1600011225.hg.1	7.42	8.78	-2.57	1.07e-09	7.02e-08	RNF166	ring finger protein 166	Multiple_Complex
TC0100018248.hg.1	9.05	10.31	-2.4	3.15e-09	1.85e-07	RNPC3	RNA binding region (RNP1, RRM) containing 3	Multiple_Complex
TC1000012430.hg.1	5.8	7.58	-3.44	0.0001	0.0016	RP11-295P9.3; PRPF18	novel transcript; Transcript Identified by AceView, Entrez Gene ID(s) 8559; RP11-295P9.3 (from geneSymbol)	NonCoding
TC2200007414.hg.1	7.28	8.39	-2.16	0.0008	0.0067	RP3-370M22.8; GRAP2	Transcript Identified by AceView, Entrez Gene ID(s) 9402; putative novel transcript	NonCoding
TC0600009142.hg.1	10.58	9.38	2.31	3.1e-05	0.0005	RPF2	ribosome production factor 2 homolog	Multiple_Complex
TC0300012346.hg.1	13.06	11.84	2.34	1.07e-08	5.42e-07	RPN1	ribophorin I	Multiple_Complex
TC0600010681.hg.1	6.29	5.27	2.04	0.0004	0.0039	RPP40	ribonuclease P/MRP 40kDa subunit	Multiple_Complex
TC0100009903.hg.1	9.65	11.05	-2.65	1.27e-11	1.32e-09	RPRD2	regulation of nuclear pre-mRNA domain containing 2	Multiple_Complex
TC1100010175.hg.1	9.83	8.57	2.4	6e-08	2.41e-06	RRAS2	related RAS viral (r-ras) oncogene homolog 2	Multiple_Complex
TC1000012582.hg.1	6.85	5.63	2.33	2.86e-08	1.3e-06	RRP12	ribosomal RNA processing 12 homolog	Multiple_Complex
TC0100011619.hg.1	11.32	10.18	2.2	0.0019	0.0138	RRP15	ribosomal RNA processing 15 homolog	Multiple_Complex
TC0300011146.hg.1	6.67	5.33	2.53	8.09e-09	4.19e-07	RRP9	ribosomal RNA processing 9, small subunit (SSU) processome component, homolog (yeast)	Multiple_Complex
TC0800012307.hg.1	9.29	8.25	2.06	3.1e-07	9.74e-06	RRS1	ribosome biogenesis regulator homolog	Coding
TC0200016402.hg.1	5.32	6.42	-2.14	0.0002	0.0023	RSAD2	radical S-adenosyl methionine domain containing 2	Multiple_Complex
TC0100013349.hg.1	9.98	11.42	-2.72	2.48e-07	8.16e-06	RSRP1	arginine/serine-rich protein 1	Multiple_Complex
TC0200011431.hg.1	4.53	5.67	-2.19	4.45e-05	0.0006	RTP5	receptor (chemosensory) transporter protein 5 (putative)	Coding
TC0300014041.hg.1	9.08	7.77	2.47	2.94e-09	1.74e-07	RUVBL1	RuvB-like AAA ATPase 1	Multiple_Complex
TC0100015822.hg.1	11.56	10.48	2.12	1.27e-07	4.53e-06	S100A11	S100 calcium binding protein A11	Multiple_Complex
TC0100009241.hg.1	13.6	15.07	-2.75	1.06e-10	9.26e-09	S1PR1	sphingosine-1-phosphate receptor 1	Multiple_Complex
TC1900011861.hg.1	11.26	10.09	2.26	4.08e-06	8.81e-05	S1PR2	sphingosine-1-phosphate receptor 2	Multiple_Complex
TC1900006621.hg.1	8.25	10.19	-3.85	2.71e-07	8.72e-06	S1PR4	sphingosine-1-phosphate receptor 4	Multiple_Complex
TC1300008329.hg.1	7.82	6.61	2.3	2.84e-05	0.0004	SACS	sacsin molecular chaperone	Multiple_Complex
TC1900009393.hg.1	9.43	10.97	-2.9	0.0003	0.0028	SAFB2	scaffold attachment factor B2	Multiple_Complex
TC0600013160.hg.1	9.93	11.95	-4.06	7.14e-07	1.97e-05	SAMD3	sterile alpha motif domain containing 3	Multiple_Complex
TC1400007207.hg.1	6.23	5.14	2.13	0.0002	0.0021	SAMD4A	sterile alpha motif domain containing 4A	Multiple_Complex
TC2100007599.hg.1	14.22	12.94	2.43	6.04e-05	0.0008	SAMSN1	SAM domain, SH3 domain and nuclear localization signals 1	Multiple_Complex
TC0800010016.hg.1	10.44	11.89	-2.73	1.37e-15	3.1e-13	SARAF	store-operated calcium entry-associated regulatory factor	Multiple_Complex
TC0100012278.hg.1	8.27	7.17	2.14	8.45e-06	0.0002	SCCPDH	saccharopine dehydrogenase (putative)	Multiple_Complex
TC1000008643.hg.1	11.67	9.18	5.6	7.77e-16	1.81e-13	SCD	stearoyl-CoA desaturase (delta-9-desaturase)	Multiple_Complex
TC0400010699.hg.1	9.45	8.17	2.42	3.79e-05	0.0006	SCFD2	sec1 family domain containing 2	Multiple_Complex
TC0X00006715.hg.1	4.46	6.53	-4.19	2e-09	1.23e-07	SCML1	sex comb on midleg-like 1 (Drosophila)	Multiple_Complex
TC0600012763.hg.1	7.55	10.18	-6.15	6.45e-16	1.57e-13	SCML4	sex comb on midleg-like 4 (Drosophila)	Multiple_Complex
TC0100016364.hg.1	7.24	8.28	-2.05	0.0001	0.0014	SCYL3	SCY1-like, kinase-like 3	Multiple_Complex
TC2000009218.hg.1	7.75	5.57	4.52	3.2e-16	8.49e-14	SDC4	syndecan 4	Multiple_Complex
TC2200006718.hg.1	10.63	8.6	4.09	4.34e-08	1.87e-06	SDF2L1	stromal cell-derived factor 2-like 1	Multiple_Complex
TC1800007446.hg.1	10.13	8.95	2.27	1.23e-08	6.12e-07	SEC11C	SEC11 homolog C, signal peptidase complex subunit	Multiple_Complex
TC0300010845.hg.1	5.9	6.96	-2.09	0.0025	0.0169	SEC22C	SEC22 homolog C, vesicle trafficking protein	Multiple_Complex
TC1000012586.hg.1	6.73	9.14	-5.31	4.66e-07	1.38e-05	SEC31B	SEC31 homolog B, COPII coat complex component	Multiple_Complex
TC0900008207.hg.1	14.49	13.01	2.78	6.09e-13	8.37e-11	SEC61B	Sec61 translocon beta subunit	Multiple_Complex
TC0700011119.hg.1	14.94	13.77	2.26	3.79e-10	2.85e-08	SEC61G	Sec61 translocon gamma subunit	Multiple_Complex
TC1700012110.hg.1	7.53	6.48	2.06	0.0014	0.0108	SECTM1	secreted and transmembrane 1	Multiple_Complex
TC1800006748.hg.1	8.63	6.97	3.14	6.94e-11	6.34e-09	SEH1L	SEH1-like nucleoporin	Multiple_Complex
TC0100016359.hg.1	10.49	12.73	-4.7	8.13e-12	8.94e-10	SELL	selectin L	Multiple_Complex
TC1200011845.hg.1	12.68	14.25	-2.96	5.55e-12	6.47e-10	SELPLG	selectin P ligand	Coding
TC1500010018.hg.1	9.2	6.08	8.71	1.05e-26	1.88e-23	SEMA7A	semaphorin 7A, GPI membrane anchor (John Milton Hagen blood group)	Multiple_Complex
TC0300011853.hg.1	6.13	7.56	-2.69	1.3e-08	6.44e-07	SENP7	SUMO1/sentrin specific peptidase 7	Multiple_Complex
TC1700008995.hg.1	10.34	13.19	-7.23	3.62e-24	3.89e-21	SEPT9	septin 9	Multiple_Complex
TC0500011260.hg.1	6.04	7.25	-2.33	4.25e-06	9.1e-05	SERINC5	serine incorporator 5	Multiple_Complex
TC1100012019.hg.1	6.73	7.9	-2.25	0.0059	0.0332	SESN3	sestrin 3	Multiple_Complex
TC1800007186.hg.1	9.63	8.62	2.01	3.72e-05	0.0006	SETBP1	SET binding protein 1	Multiple_Complex
TC1200009183.hg.1	8.33	9.6	-2.41	1.65e-07	5.72e-06	SETD1B	SET domain containing 1B	Multiple_Complex
TC0200015348.hg.1	11.18	12.26	-2.12	0.0006	0.0055	SF3B1	splicing factor 3b, subunit 1, 155kDa	Multiple_Complex
TC0600013231.hg.1	7.92	5.92	4.01	5.18e-08	2.15e-06	SGK1	serum/glucocorticoid regulated kinase 1	Multiple_Complex
TC1000007936.hg.1	7.97	6.23	3.34	8.27e-11	7.3e-09	SGPL1	sphingosine-1-phosphate lyase 1	Multiple_Complex
TC0200010897.hg.1	8.24	6.49	3.38	4.21e-10	3.1e-08	SGPP2	sphingosine-1-phosphate phosphatase 2	Multiple_Complex
TC1700006547.hg.1	9.69	11.19	-2.81	7.99e-06	0.0002	SGSM2	small G protein signaling modulator 2	Multiple_Complex
TC1200008873.hg.1	7.55	6.43	2.17	0.0004	0.0038	SH2B3	SH2B adaptor protein 3	Multiple_Complex
TC2200007309.hg.1	8.93	10.09	-2.23	1.34e-08	6.55e-07	SH3BP1; PDXP	SH3-domain binding protein 1; pyridoxal (pyridoxine, vitamin B6) phosphatase	Multiple_Complex
TC0300011023.hg.1	15.01	16.36	-2.56	5.42e-19	2.58e-16	SHISA5	shisa family member 5	Multiple_Complex
TC1200007866.hg.1	11.15	8.88	4.82	3.87e-20	2.31e-17	SHMT2	serine hydroxymethyltransferase 2 (mitochondrial)	Multiple_Complex
TC1100012681.hg.1	5.28	6.58	-2.45	4.09e-05	0.0006	SIAE	sialic acid acetylesterase	Multiple_Complex
TC0300008361.hg.1	8.23	9.44	-2.32	0.0001	0.0015	SIDT1	SID1 transmembrane family, member 1	Multiple_Complex
TC1100009168.hg.1	8.49	9.5	-2.02	3.59e-05	0.0005	SIDT2	SID1 transmembrane family, member 2	Multiple_Complex
TC1100009666.hg.1	6.61	8.35	-3.35	7.74e-12	8.56e-10	SIGIRR	single immunoglobulin and toll-interleukin 1 receptor (TIR) domain	Multiple_Complex
TC1100013045.hg.1	7.87	9.02	-2.22	2.43e-05	0.0004	SIPA1	signal-induced proliferation-associated 1	Multiple_Complex
TC0100016138.hg.1	10.3	8.53	3.41	2.24e-08	1.05e-06	SLAMF1	signaling lymphocytic activation molecule family member 1	Multiple_Complex
TC0100010303.hg.1	6.62	9.16	-5.84	4.09e-06	8.82e-05	SLAMF6	Memczak2013 ANTISENSE, coding, INTERNAL, intronic best transcript NM_052931	NonCoding
TC0100016135.hg.1	10.55	12.02	-2.77	1.03e-07	3.81e-06	SLAMF6	SLAM family member 6	Coding
TC0100015310.hg.1	7.36	6.34	2.02	0.0017	0.0124	SLC16A1	solute carrier family 16 (monocarboxylate transporter), member 1	Multiple_Complex
TSUnmapped00000474.hg.1	7.08	5.79	2.44	1.88e-06	4.59e-05	SLC16A1	solute carrier family 16 (monocarboxylate transporter), member 1	Coding
TC1900011004.hg.1	11.21	8.09	8.68	1.26e-25	1.8e-22	SLC1A5	solute carrier family 1 (neutral amino acid transporter), member 5	Multiple_Complex
TC0300008989.hg.1	9.67	10.69	-2.02	0.0001	0.0013	SLC25A36	solute carrier family 25 (pyrimidine nucleotide carrier), member 36	Multiple_Complex
TC0X00010434.hg.1	4.63	6.07	-2.71	2.13e-10	1.71e-08	SLC25A53	solute carrier family 25, member 53	Multiple_Complex
TC1500007196.hg.1	7.08	4.96	4.32	5.88e-10	4.14e-08	SLC27A2	solute carrier family 27 (fatty acid transporter), member 2	Multiple_Complex
TC0600008127.hg.1	5.84	4.74	2.14	1.47e-07	5.16e-06	SLC29A1	solute carrier family 29 (equilibrative nucleoside transporter), member 1	Multiple_Complex
TC0100018390.hg.1	9.87	11.55	-3.21	4.33e-08	1.87e-06	SLC35E2	solute carrier family 35, member E2	Multiple_Complex
TC0100018388.hg.1	9.1	10.84	-3.33	3.2e-09	1.86e-07	SLC35E2B	solute carrier family 35, member E2B	Multiple_Complex
TC1200010516.hg.1	10.75	11.79	-2.05	5.57e-06	0.0001	SLC38A1	solute carrier family 38, member 1	Multiple_Complex
TC1200011767.hg.1	7.46	6.09	2.59	1.5e-06	3.78e-05	SLC41A2	solute carrier family 41 (magnesium transporter), member 2	Multiple_Complex
TC0200016689.hg.1	7.84	8.88	-2.05	0.0003	0.0033	SLC4A5	solute carrier family 4 (sodium bicarbonate cotransporter), member 5	Multiple_Complex
TC0300006677.hg.1	9.38	11.04	-3.15	2.02e-07	6.79e-06	SLC6A6	solute carrier family 6 (neurotransmitter transporter), member 6	Multiple_Complex
TC1300008487.hg.1	11.03	8.47	5.93	3.48e-22	2.66e-19	SLC7A1	solute carrier family 7 (cationic amino acid transporter, y+ system), member 1	Multiple_Complex
TC1600011186.hg.1	12.01	8.09	15.14	1.12e-12	1.49e-10	SLC7A5	solute carrier family 7 (amino acid transporter light chain, L system), member 5	Multiple_Complex
TC1200011993.hg.1	8.41	9.53	-2.18	2.59e-05	0.0004	SLC8B1	solute carrier family 8 (sodium/lithium/calcium exchanger), member B1	Multiple_Complex
TC1700010426.hg.1	8.99	10.65	-3.16	0.0003	0.0034	SLFN13	schlafen family member 13	Multiple_Complex
TC1700007585.hg.1	9.27	11.62	-5.08	2.2e-08	1.05e-06	SLFN5	schlafen family member 5	Multiple_Complex
TC1600007449.hg.1	9.13	10.32	-2.27	5.17e-06	0.0001	SLX1A; SLX1B; SLX1A-SULT1A3; SLX1B-SULT1A4; SULT1A3	SLX1 homolog A, structure-specific endonuclease subunit; SLX1 homolog B, structure-specific endonuclease subunit; SLX1A-SULT1A3 readthrough (NMD candidate); SLX1B-SULT1A4 readthrough (NMD candidate); sulfotransferase family 1A member 3	Multiple_Complex
TC0300009337.hg.1	8.01	9.17	-2.24	0.0052	0.0302	SMC4	structural maintenance of chromosomes 4	Multiple_Complex
TC0200016637.hg.1	5.55	6.78	-2.36	0.0002	0.0025	SMC6	structural maintenance of chromosomes 6	Multiple_Complex
TC0100018045.hg.1	7.63	8.71	-2.12	1.81e-07	6.18e-06	SMYD3	SET and MYND domain containing 3	Multiple_Complex
TC1700009402.hg.1	6.92	8.05	-2.18	1.72e-06	4.27e-05	SMYD4	SET and MYND domain containing 4	Multiple_Complex
TC0700009020.hg.1	9.47	8.3	2.25	2.9e-09	1.73e-07	SND1; SND1-IT1	staphylococcal nuclease and tudor domain containing 1; SND1 intronic transcript 1	Multiple_Complex
TC0200011379.hg.1	6.11	8.2	-4.26	1.65e-05	0.0003	SNED1	sushi, nidogen and EGF-like domains 1	Multiple_Complex
TC0200016719.hg.1	9.28	10.46	-2.27	2.31e-06	5.48e-05	SNORD89; RNF149	small nucleolar RNA, C/D box 89; ring finger protein 149	Multiple_Complex
TC0300007189.hg.1	8.46	10.18	-3.28	1.3e-12	1.7e-10	SNRK	SNF related kinase	Multiple_Complex
TC2000009972.hg.1	12.7	11.44	2.39	1.19e-10	1.02e-08	SNRPB	small nuclear ribonucleoprotein polypeptides B and B1	Multiple_Complex
TC0600007769.hg.1	9.93	8.83	2.14	4.62e-07	1.37e-05	SNRPC	small nuclear ribonucleoprotein polypeptide C	Multiple_Complex
TC1800006834.hg.1	11.45	10.11	2.52	4.54e-07	1.35e-05	SNRPD1	small nuclear ribonucleoprotein D1 polypeptide	Multiple_Complex
TC1500010698.hg.1	11.6	12.62	-2.03	7.41e-10	5.08e-08	SNRPN; SNURF; SNORD107; PWARSN	small nuclear ribonucleoprotein polypeptide N; SNRPN upstream reading frame; small nucleolar RNA, C/D box 107; Prader Willi/Angelman region RNA, SNRPN neighbor	Multiple_Complex
TC0800011634.hg.1	5.58	6.77	-2.29	2.32e-05	0.0004	SNTB1	syntrophin, beta 1 (dystrophin-associated protein A1, 59kDa, basic component 1)	Multiple_Complex
TC0700006984.hg.1	8.44	6.72	3.3	3.22e-13	4.66e-11	SNX10	sorting nexin 10	Multiple_Complex
TC0800010949.hg.1	5.58	7.06	-2.8	7.6e-07	2.08e-05	SNX16	sorting nexin 16	Multiple_Complex
TC0600014196.hg.1	12.71	10.86	3.6	5.26e-08	2.17e-06	SNX9	sorting nexin 9	Multiple_Complex
TC1200008474.hg.1	9.3	5.71	11.99	8.45e-19	3.7e-16	SOCS2	suppressor of cytokine signaling 2	Coding
TC1100009309.hg.1	8.29	10.74	-5.47	1.56e-15	3.45e-13	SORL1	sortilin-related receptor, L(DLR class) A repeats containing	Multiple_Complex
TC1100012574.hg.1	11.25	13.45	-4.58	6.07e-12	6.95e-10	SORL1	Memczak2013 ANTISENSE, CDS, coding, INTERNAL best transcript NM_003105	NonCoding
TC0200011023.hg.1	11.5	12.75	-2.38	8.46e-07	2.29e-05	SP100	SP100 nuclear antigen	Multiple_Complex
TC0200015976.hg.1	11.12	12.16	-2.06	5.85e-06	0.0001	SP110	SP110 nuclear body protein	Multiple_Complex
TC0200014971.hg.1	11.26	12.33	-2.11	7.76e-07	2.12e-05	SP3	Sp3 transcription factor	Multiple_Complex
TC1100008447.hg.1	12.57	11.55	2.02	1.9e-08	9.09e-07	SPCS2	signal peptidase complex subunit 2	Multiple_Complex
TC0400009379.hg.1	13.27	12.04	2.34	1.51e-11	1.54e-09	SPCS3	signal peptidase complex subunit 3	Multiple_Complex
TC2200009234.hg.1	7.45	8.55	-2.14	0.0001	0.0015	SPECC1L-ADORA2A	SPECC1L-ADORA2A readthrough (NMD candidate)	Multiple_Complex
TC1300008614.hg.1	6.7	7.83	-2.18	0.0005	0.0049	SPG20	spastic paraplegia 20 (Troyer syndrome)	Multiple_Complex
TC0300012023.hg.1	6.46	7.93	-2.78	4.31e-09	2.4e-07	SPICE1	spindle and centriole associated protein 1	Multiple_Complex
TC1500006972.hg.1	7.97	5.76	4.6	1.56e-14	2.85e-12	SPINT1	serine peptidase inhibitor, Kunitz type 1	Multiple_Complex
TC1600011367.hg.1	9.36	10.41	-2.08	5.61e-05	0.0008	SPNS1	spinster homolog 1 (Drosophila)	Multiple_Complex
TC1900011642.hg.1	7.11	8.67	-2.93	1.13e-07	4.11e-06	SPPL2B	signal peptide peptidase like 2B	Multiple_Complex
TC0200007609.hg.1	10.06	11.45	-2.61	8.03e-08	3.1e-06	SPTBN1	spectrin, beta, non-erythrocytic 1	Multiple_Complex
TC0800008783.hg.1	8.86	6.77	4.26	1.88e-11	1.89e-09	SQLE	squalene epoxidase	Multiple_Complex
TC0400007556.hg.1	9.65	8.64	2.01	0.0034	0.0217	SRD5A3	steroid 5 alpha-reductase 3	Multiple_Complex
TC2200007495.hg.1	13.73	12.27	2.76	2.61e-06	6.03e-05	SREBF2	sterol regulatory element binding transcription factor 2	Multiple_Complex
TC1000007883.hg.1	13.2	12.09	2.17	3.24e-13	4.67e-11	SRGN	serglycin	Multiple_Complex
TC0100012869.hg.1	9.71	8.32	2.62	3.42e-08	1.52e-06	SRM	spermidine synthase	Multiple_Complex
TC0300013874.hg.1	10.29	8.81	2.78	5.05e-08	2.1e-06	SRPRB	signal recognition particle receptor, B subunit	Multiple_Complex
TC1600006633.hg.1	13.89	15	-2.15	1.28e-05	0.0002	SRRM2	serine/arginine repetitive matrix 2	Multiple_Complex
TC1400007562.hg.1	14.97	16.24	-2.42	3.85e-06	8.37e-05	SRSF5	serine/arginine-rich splicing factor 5	Multiple_Complex
TC0500013336.hg.1	9.67	10.97	-2.46	5.2e-07	1.52e-05	SSBP2	single-stranded DNA binding protein 2	Multiple_Complex
TC1700010254.hg.1	9.47	10.7	-2.35	1.61e-09	1.02e-07	SSH2	slingshot protein phosphatase 2	Multiple_Complex
TC1100013042.hg.1	7.86	6.49	2.59	4.1e-06	8.82e-05	SSSCA1	Sjogren syndrome/scleroderma autoantigen 1	Multiple_Complex
TC0300009789.hg.1	8.47	9.89	-2.69	9.69e-08	3.61e-06	ST6GAL1	ST6 beta-galactosamide alpha-2,6-sialyltranferase 1	Multiple_Complex
TC0700011519.hg.1	12.98	14.01	-2.04	0.0013	0.0104	STAG3L2	stromal antigen 3-like 2 (pseudogene)	Multiple_Complex
TC0500011702.hg.1	10.48	9.26	2.32	1.25e-10	1.06e-08	STARD4	StAR-related lipid transfer domain containing 4	Multiple_Complex
TC1500010908.hg.1	9.23	10.78	-2.92	1.83e-12	2.34e-10	STARD5	StAR-related lipid transfer domain containing 5	NonCoding
TC1500010909.hg.1	8.45	9.46	-2.01	8.07e-08	3.11e-06	STARD5	StAR-related lipid transfer domain containing 5	Multiple_Complex
TC0200013515.hg.1	10.68	9.52	2.23	2.2e-10	1.75e-08	STARD7	StAR-related lipid transfer domain containing 7	Multiple_Complex
TC1700007883.hg.1	11.63	10.22	2.67	3.26e-11	3.11e-09	STAT5A	signal transducer and activator of transcription 5A	Multiple_Complex
TC0400012781.hg.1	8.12	10.06	-3.85	3.66e-07	1.12e-05	STIM2	stromal interaction molecule 2	NonCoding
TC1100007935.hg.1	12.38	10.52	3.63	6.79e-24	6.93e-21	STIP1	stress-induced phosphoprotein 1	Multiple_Complex
TC0700007345.hg.1	11.76	13.39	-3.09	1.02e-13	1.62e-11	STK17A	serine/threonine kinase 17a	Multiple_Complex
TC0600011661.hg.1	11.21	13.11	-3.74	1.49e-16	4.31e-14	STK38	serine/threonine kinase 38	Multiple_Complex
TC2000009823.hg.1	6.29	7.43	-2.2	4.26e-09	2.38e-07	STMN3	stathmin-like 3	Multiple_Complex
TC0900009932.hg.1	11.67	10.63	2.05	1.55e-07	5.42e-06	STOML2	stomatin (EPB72)-like 2	Multiple_Complex
TC0600009710.hg.1	11.82	9.33	5.63	6.91e-19	3.09e-16	STX11	syntaxin 11	Coding
TC2000009949.hg.1	8	9.96	-3.88	5.95e-09	3.2e-07	STX16	syntaxin 16	Multiple_Complex
TC2000009947.hg.1	8.38	9.76	-2.61	4.36e-07	1.3e-05	STX16-NPEPL1	STX16-NPEPL1 readthrough (NMD candidate)	Multiple_Complex
TC1900010037.hg.1	6.36	7.57	-2.31	4.35e-05	0.0006	SUGP2	SURP and G-patch domain containing 2	Multiple_Complex
TC2200009353.hg.1	7.94	9.78	-3.56	6.48e-14	1.06e-11	SUN2	Sad1 and UNC84 domain containing 2	Multiple_Complex
TSUnmapped00000205.hg.1	13.17	12.14	2.05	3.74e-07	1.14e-05	SURF4	surfeit 4	Coding
TSUnmapped00000333.hg.1	13.76	12.7	2.1	1.23e-07	4.4e-06	SURF4	surfeit 4	Coding
TSUnmapped00000477.hg.1	13.79	12.71	2.12	6.08e-07	1.74e-05	SURF4	surfeit 4	Coding
TC0900007976.hg.1	8.24	9.89	-3.13	8.39e-08	3.21e-06	SUSD3	sushi domain containing 3	Coding
TC0100013348.hg.1	11.55	12.56	-2.02	0.0001	0.0013	SYF2	SYF2 pre-mRNA-splicing factor	Multiple_Complex
TC0600013588.hg.1	5.69	7.04	-2.54	3.24e-05	0.0005	SYNE1	spectrin repeat containing, nuclear envelope 1	Multiple_Complex
TC1400007430.hg.1	9.74	11.55	-3.5	6.35e-05	0.0009	SYNE2	spectrin repeat containing, nuclear envelope 2	Multiple_Complex
TC0600014111.hg.1	9.67	11.25	-2.99	3.7e-09	2.1e-07	SYNGAP1; MIR5004	synaptic Ras GTPase activating protein 1; microRNA 5004	Multiple_Complex
TC1500010796.hg.1	5.15	6.24	-2.13	0.0058	0.0327	SYNM	synemin, intermediate filament protein	Multiple_Complex
TC1700010497.hg.1	11.86	12.9	-2.06	2.37e-13	3.5e-11	SYNRG	synergin, gamma	Multiple_Complex
TC0100007510.hg.1	5.96	7.23	-2.42	3.92e-08	1.71e-06	SYTL1	synaptotagmin like 1	Multiple_Complex
TC0200009986.hg.1	5.95	4.95	2.01	3.72e-05	0.0006	ZAK; pk	sterile alpha motif and leucine zipper containing kinase AZK; Mitogen-activated protein kinase kinase kinase MLT [Source:UniProtKB/Swiss-Prot;Acc:Q9NYL2]; Salzman2013 ANNOTATED, CDS, coding, INTERNAL, OVCODE, OVERLAPTX, OVEXON best transcript NM_133646; Salzman2013 ANNOTATED, CDS, coding, OVCODE, OVERLAPTX, OVEXON, UTR3 best transcript NM_016653; Salzman2013 ANNOTATED, CDS, coding, OVCODE, OVERLA…	Multiple_Complex
TC0200008556.hg.1	10	11.84	-3.57	1.5e-15	3.36e-13	ZAP70	zeta chain of T cell receptor associated protein kinase 70kDa	Multiple_Complex
TC2000009602.hg.1	4.4	6.16	-3.39	9.65e-09	4.91e-07	ZBP1	Z-DNA binding protein 1	Multiple_Complex
TC1400007442.hg.1	11.48	12.9	-2.67	1.74e-07	5.96e-06	ZBTB1	zinc finger and BTB domain containing 1	Multiple_Complex
TC1800007960.hg.1	6.04	7.62	-2.99	4.78e-09	2.64e-07	ZBTB14	zinc finger and BTB domain containing 14	Multiple_Complex
TC0300012048.hg.1	10.69	12.95	-4.79	1.04e-07	3.83e-06	ZBTB20; MIR568	zinc finger and BTB domain containing 20; microRNA 568	Multiple_Complex
TC1400009410.hg.1	12.02	13.61	-3.03	4.06e-10	3.01e-08	ZBTB25	zinc finger and BTB domain containing 25	Multiple_Complex
TC1700009640.hg.1	9.41	10.43	-2.02	2.29e-05	0.0004	ZBTB4	zinc finger and BTB domain containing 4	Multiple_Complex
TC0200008911.hg.1	6.85	8.61	-3.38	4.42e-07	1.32e-05	ZC3H6	zinc finger CCCH-type containing 6	Multiple_Complex
TC0100014203.hg.1	7.49	8.57	-2.11	0.0006	0.0053	ZCCHC11	zinc finger, CCHC domain containing 11	Multiple_Complex
TC2200006643.hg.1	7.5	8.55	-2.08	1.15e-05	0.0002	ZDHHC8	zinc finger, DHHC-type containing 8	Multiple_Complex
TC0900011655.hg.1	6.47	7.84	-2.59	2.6e-05	0.0004	ZER1	zyg-11 related, cell cycle regulator	Multiple_Complex
TC0200012404.hg.1	7.11	8.78	-3.18	6.08e-07	1.74e-05	ZFP36L2	ZFP36 ring finger protein-like 2	Multiple_Complex
TC1600008199.hg.1	8.26	9.34	-2.12	1.13e-06	2.95e-05	ZFP90	ZFP90 zinc finger protein	Multiple_Complex
TC0700008517.hg.1	10.04	11.44	-2.65	0.0002	0.002	ZKSCAN1	zinc finger with KRAB and SCAN domains 1	Multiple_Complex
TC0X00010375.hg.1	6.9	9.09	-4.56	3.06e-06	6.95e-05	ZMAT1	zinc finger, matrin-type 1	Multiple_Complex
TC2000009292.hg.1	8.61	9.65	-2.06	1.5e-05	0.0003	ZMYND8	zinc finger, MYND-type containing 8	Multiple_Complex
TC1900010158.hg.1	10.06	11.23	-2.26	5.14e-06	0.0001	ZNF100	zinc finger protein 100	Multiple_Complex
TC1900007447.hg.1	8.63	9.81	-2.26	0.0002	0.0019	ZNF101	zinc finger protein 101	Multiple_Complex
TC0700013370.hg.1	10.33	11.44	-2.16	0.0005	0.0048	ZNF107; MIR6839	zinc finger protein 107; microRNA 6839	Multiple_Complex
TC0700010216.hg.1	7.27	8.42	-2.22	2.52e-06	5.9e-05	ZNF12	zinc finger protein 12	Multiple_Complex
TC0500013166.hg.1	7.69	8.78	-2.14	0.0003	0.0035	ZNF131	zinc finger protein 131	NonCoding
TC1600011341.hg.1	8.2	9.26	-2.08	7.02e-07	1.95e-05	ZNF174	zinc finger protein 174	Multiple_Complex
TC1900008655.hg.1	5.58	6.91	-2.52	0.0013	0.0101	ZNF175	zinc finger protein 175	Multiple_Complex
TC1900011755.hg.1	9.32	10.55	-2.35	3.08e-08	1.38e-06	ZNF226	zinc finger protein 226	Multiple_Complex
TC1000010362.hg.1	6.11	7.62	-2.85	1.46e-06	3.69e-05	ZNF248	zinc finger protein 248	Multiple_Complex
TC0800012245.hg.1	6.05	7.11	-2.08	6.26e-05	0.0009	ZNF250	zinc finger protein 250	Multiple_Complex
TC1900007456.hg.1	10.26	11.76	-2.85	6.78e-07	1.89e-05	ZNF253	zinc finger protein 253	Multiple_Complex
TC0700013375.hg.1	7.31	8.45	-2.21	3.18e-09	1.86e-07	ZNF273	zinc finger protein 273	Multiple_Complex
TC1900008240.hg.1	8.36	9.4	-2.06	0.0002	0.0023	ZNF283	zinc finger protein 283	Multiple_Complex
TC1900011753.hg.1	5.35	6.37	-2.03	3.74e-06	8.2e-05	ZNF284	zinc finger protein 284	Multiple_Complex
TC0600008722.hg.1	7.45	8.59	-2.2	0.0007	0.0065	ZNF292	zinc finger protein 292	Multiple_Complex
TC0600011162.hg.1	6.45	7.56	-2.16	0.0002	0.002	ZNF322	zinc finger protein 322	Multiple_Complex
TC2000008755.hg.1	7.29	8.3	-2.01	0.0057	0.032	ZNF337	zinc finger protein 337	Multiple_Complex
TC1000010411.hg.1	7.45	8.67	-2.33	0.0004	0.0039	ZNF33B	zinc finger protein 33B	Multiple_Complex
TC1900007963.hg.1	8.13	9.4	-2.41	0.0004	0.0041	ZNF383	zinc finger protein 383	Multiple_Complex
TC0700011944.hg.1	8.44	9.66	-2.33	0.0002	0.0023	ZNF394	zinc finger protein 394	Multiple_Complex
TC1900011692.hg.1	6.74	7.76	-2.03	1.82e-06	4.47e-05	ZNF429	zinc finger protein 429	Multiple_Complex
TC0X00008509.hg.1	5.39	7.61	-4.65	7.2e-09	3.76e-07	ZNF449	zinc finger protein 449	Coding
TC1900008692.hg.1	8.79	9.82	-2.05	5.36e-06	0.0001	ZNF480	zinc finger protein 480	Multiple_Complex
TC0900008425.hg.1	4.2	5.54	-2.54	1.46e-05	0.0003	ZNF483	zinc finger protein 483	Multiple_Complex
TC0200016418.hg.1	6.09	7.2	-2.15	3.3e-05	0.0005	ZNF512	zinc finger protein 512	Multiple_Complex
TC1900011813.hg.1	6.41	8	-3.02	4.5e-05	0.0006	ZNF548	zinc finger protein 548	Multiple_Complex
TC1900011571.hg.1	5.36	6.56	-2.3	5.5e-06	0.0001	ZNF550	zinc finger protein 550	Multiple_Complex
TC1900011933.hg.1	8.88	10.05	-2.25	6.24e-09	3.33e-07	ZNF585A	zinc finger protein 585A	Multiple_Complex
TC1900011934.hg.1	9.46	11	-2.9	2.38e-05	0.0004	ZNF585B	zinc finger protein 585B	Multiple_Complex
TC1900010443.hg.1	6.26	7.31	-2.07	0.0002	0.0019	ZNF599	zinc finger protein 599	Multiple_Complex
TC0300008017.hg.1	7.28	8.5	-2.33	0.0002	0.0024	ZNF654	zinc finger protein 654	Coding
TC0100013384.hg.1	5.3	6.56	-2.39	0.0002	0.0021	ZNF683	zinc finger protein 683	Coding
TC1200012594.hg.1	6.52	8.69	-4.51	2.56e-06	5.95e-05	ZNF705A; FAM66C	zinc finger protein 705A; family with sequence similarity 66, member C	Multiple_Complex
TC1900011919.hg.1	7.99	9.62	-3.09	3.26e-07	1.02e-05	ZNF708	zinc finger protein 708	Multiple_Complex
TC1900011915.hg.1	8.27	9.28	-2.01	2.8e-06	6.42e-05	ZNF737	zinc finger protein 737	Multiple_Complex
TC0X00010895.hg.1	8.64	9.7	-2.08	0.0002	0.0021	ZNF75D	zinc finger protein 75D	Multiple_Complex
TC1900011668.hg.1	6.02	7.6	-2.97	5.53e-06	0.0001	ZNF763	zinc finger protein 763	Coding
TC0700013490.hg.1	7.07	8.34	-2.42	2.69e-13	3.92e-11	ZNF775	zinc finger protein 775	Multiple_Complex
TC1900011821.hg.1	6.96	8.07	-2.16	8.89e-07	2.39e-05	ZNF776	zinc finger protein 776	Multiple_Complex
TSUnmapped00000670.hg.1	7.62	9.16	-2.91	1.06e-05	0.0002	ZNF780A	zinc finger protein 780A	Coding
TSUnmapped00000311.hg.1	7.62	9.08	-2.75	1.84e-06	4.52e-05	ZNF780A	zinc finger protein 780A	Coding
TSUnmapped00000222.hg.1	7.68	9.13	-2.73	6.7e-06	0.0001	ZNF780A	zinc finger protein 780A	Coding
TC1900010460.hg.1	6	7.63	-3.1	6.81e-10	4.73e-08	ZNF792	zinc finger protein 792	Multiple_Complex
TC0300012047.hg.1	9.83	8.8	2.04	0.0017	0.0123	ZNF80	zinc finger protein 80	Coding
TC0700013615.hg.1	10.24	11.25	-2.01	9.82e-06	0.0002	ZNF800	zinc finger protein 800	Multiple_Complex
TC1900011305.hg.1	6.38	8.02	-3.11	3.35e-05	0.0005	ZNF83	zinc finger protein 83	Multiple_Complex
TC1900011858.hg.1	6.01	7.84	-3.56	7.74e-11	6.86e-09	ZNF846	zinc finger protein 846	Multiple_Complex
TC1900010533.hg.1	6.14	7.65	-2.85	0.0006	0.0053	ZNF850	zinc finger protein 850	Multiple_Complex
TC0300010891.hg.1	7.14	8.3	-2.22	0.0019	0.0138	ZNF852	zinc finger protein 852	Multiple_Complex
TC0700009647.hg.1	7.57	9.5	-3.81	4.32e-07	1.29e-05	ZNF862	zinc finger protein 862	Multiple_Complex
TC0700008501.hg.1	7.04	8.47	-2.69	3.25e-09	1.88e-07	ZSCAN25	zinc finger and SCAN domain containing 25	Multiple_Complex
TC0300012281.hg.1	8.34	9.51	-2.26	0.0026	0.0175	ZXDC	ZXD family zinc finger C	Multiple_Complex
TC0600008035.hg.1	10.49	11.53	-2.06	1.04e-08	5.3e-07	TAF8	TATA box binding protein associated factor 8	Multiple_Complex
TC1100009169.hg.1	4.63	5.76	-2.2	0.0005	0.005	TAGLN	transgelin	Multiple_Complex
TC0100017788.hg.1	6.91	8.04	-2.19	9.51e-05	0.0012	TARBP1	TAR (HIV-1) RNA binding protein 1	Multiple_Complex
TC1100008133.hg.1	8.37	9.83	-2.76	3.53e-07	1.09e-05	TBC1D10C	TBC1 domain family, member 10C	Multiple_Complex
TC0400007128.hg.1	7.68	9.05	-2.58	0.0009	0.0076	TBC1D19	TBC1 domain family, member 19	Multiple_Complex
TC1700009277.hg.1	7.9	9.17	-2.4	0.0057	0.0321	TBCD	tubulin folding cofactor D	Multiple_Complex
TC1100009301.hg.1	6.66	7.92	-2.39	6.06e-07	1.73e-05	TBCEL	tubulin folding cofactor E-like	Multiple_Complex
TC1400010777.hg.1	9.43	11.61	-4.51	1.55e-09	9.87e-08	TC2N	tandem C2 domains, nuclear	Multiple_Complex
TC0700009508.hg.1	11.81	12.86	-2.07	4.51e-06	9.56e-05	TCAF2	TRPM8 channel-associated factor 2	Multiple_Complex
TC0100013278.hg.1	6.26	7.43	-2.25	6.02e-05	0.0008	TCEA3	transcription elongation factor A (SII), 3	Multiple_Complex
TC0X00011274.hg.1	6.08	7.15	-2.09	0.002	0.0145	TCEANC	transcription elongation factor A (SII) N-terminal and central domain containing	Multiple_Complex
TC0500008684.hg.1	8.3	9.4	-2.14	2.06e-11	2.04e-09	TCF7	transcription factor 7 (T-cell specific, HMG-box)	Multiple_Complex
TC1100013057.hg.1	11.1	12.24	-2.21	8.6e-05	0.0011	TCIRG1	T-cell, immune regulator 1, ATPase, H+ transporting, lysosomal V0 subunit A3	Multiple_Complex
TC1200008726.hg.1	8.07	10.21	-4.41	1.55e-19	8.76e-17	TCP11L2	t-complex 11, testis-specific-like 2	Multiple_Complex
TC1200008848.hg.1	5.24	6.28	-2.06	0.0006	0.0054	TCTN1	tectonic family member 1	Multiple_Complex
TC1900007181.hg.1	10.86	11.89	-2.04	5.26e-07	1.53e-05	TECR; MIR639	trans-2,3-enoyl-CoA reductase; microRNA 639	Multiple_Complex
TC1300009673.hg.1	9.18	7.97	2.31	0.0001	0.0013	TEX30	testis expressed 30	Multiple_Complex
TC0300012654.hg.1	8.84	9.96	-2.18	1.82e-05	0.0003	TFDP2	transcription factor Dp-2 (E2F dimerization partner 2)	Multiple_Complex
TC0400007876.hg.1	6.81	7.96	-2.23	0.0001	0.0015	THAP6	THAP domain containing 6	Multiple_Complex
TC0100015817.hg.1	8.34	9.54	-2.3	2.59e-06	6.01e-05	THEM4	thioesterase superfamily member 4	Multiple_Complex
TC0600013125.hg.1	11.67	14	-5.03	3.2e-15	6.61e-13	THEMIS	thymocyte selection associated	Coding
TC1700007777.hg.1	9.13	10.44	-2.48	1.22e-07	4.37e-06	THRA	thyroid hormone receptor, alpha	Multiple_Complex
TC0300008385.hg.1	12.69	10.97	3.29	9.51e-10	6.37e-08	TIGIT	T-cell immunoreceptor with Ig and ITIM domains	Multiple_Complex
TC0500012587.hg.1	5.95	4.6	2.55	4.2e-06	9e-05	TIMD4	T-cell immunoglobulin and mucin domain containing 4	Coding
TC1900011840.hg.1	9.49	8.33	2.23	0.0004	0.0042	TIMM13	translocase of inner mitochondrial membrane 13 homolog (yeast)	Coding
TC1900011729.hg.1	8.37	7.29	2.11	0.001	0.0084	TIMM50	translocase of inner mitochondrial membrane 50 homolog (S. cerevisiae)	Multiple_Complex
TC1700010209.hg.1	7.71	6.25	2.75	8.23e-09	4.24e-07	TLCD1	TLC domain containing 1	Multiple_Complex
TC1400010723.hg.1	9.21	7.8	2.66	1e-06	2.66e-05	TM9SF1	transmembrane 9 superfamily member 1	Multiple_Complex
TC0400009179.hg.1	8.26	7.1	2.24	9.05e-06	0.0002	TMA16	translation machinery associated 16 homolog	Multiple_Complex
TC1700009036.hg.1	5.27	6.65	-2.62	0.0004	0.0043	TMC8	transmembrane channel like 8	Multiple_Complex
TC1200011961.hg.1	6.23	8.17	-3.84	5.57e-08	2.27e-06	TMEM116	transmembrane protein 116	Multiple_Complex
TC0200013578.hg.1	9.64	10.69	-2.07	0.0003	0.0032	TMEM131	transmembrane protein 131	Multiple_Complex
TC1900007864.hg.1	11.77	10.7	2.1	0.0005	0.0046	TMEM147	transmembrane protein 147	Multiple_Complex
TC0400012150.hg.1	4.79	5.96	-2.25	0.0003	0.0033	TMEM154	transmembrane protein 154	Multiple_Complex
TC0500011333.hg.1	10.97	9.86	2.16	0.0008	0.0071	TMEM167A	transmembrane protein 167A	Multiple_Complex
TC2200006552.hg.1	4.63	5.71	-2.12	3.11e-06	7.04e-05	TMEM191B	transmembrane protein 191B	Multiple_Complex
TC1600006550.hg.1	6.37	8.27	-3.74	4.92e-12	5.79e-10	TMEM204	transmembrane protein 204	Coding
TC0200015431.hg.1	6.47	5.46	2.02	0.0003	0.0034	TMEM237	transmembrane protein 237	Multiple_Complex
TC0900011151.hg.1	7.97	9.4	-2.7	1.51e-07	5.28e-06	TMEM245	transmembrane protein 245	Multiple_Complex
TC1000008221.hg.1	6.3	7.66	-2.57	1.82e-05	0.0003	TMEM254	transmembrane protein 254	Multiple_Complex
TC1900009128.hg.1	11.43	12.47	-2.05	0.0011	0.0091	TMEM259	transmembrane protein 259	Multiple_Complex
TC1100010063.hg.1	6.17	7.19	-2.03	6.36e-06	0.0001	TMEM41B	transmembrane protein 41B	Multiple_Complex
TSUnmapped00000240.hg.1	7.69	8.84	-2.22	2.23e-08	1.05e-06	TMEM42	transmembrane protein 42	Coding
TC2100007996.hg.1	10.77	12.22	-2.74	7.68e-07	2.1e-05	TMEM50B	transmembrane protein 50B	Multiple_Complex
TC0100017500.hg.1	10.68	12.97	-4.88	1.75e-14	3.16e-12	TMEM63A	transmembrane protein 63A	Multiple_Complex
TC0800011071.hg.1	8.57	7.53	2.05	6.01e-07	1.72e-05	TMEM64	transmembrane protein 64	Multiple_Complex
TC0800012469.hg.1	6.89	8.97	-4.23	2.92e-08	1.32e-06	TMEM71	transmembrane protein 71	NonCoding
TC0800012470.hg.1	8.64	10.28	-3.11	2.92e-12	3.64e-10	TMEM71	transmembrane protein 71	Multiple_Complex
TC1100006485.hg.1	8.29	9.72	-2.69	4.04e-07	1.22e-05	TMEM80	transmembrane protein 80	Multiple_Complex
TC0600007596.hg.1	9.65	5.98	12.76	1.43e-21	1.02e-18	TNF	tumor necrosis factor	Multiple_Complex
TC0500008437.hg.1	11.43	9.03	5.27	1.49e-14	2.76e-12	TNFAIP8	tumor necrosis factor, alpha-induced protein 8	Multiple_Complex
TC0100012452.hg.1	9.95	5.62	20.05	3.2e-24	3.61e-21	TNFRSF18	tumor necrosis factor receptor superfamily, member 18	Coding
TC0100018398.hg.1	9.05	10.28	-2.35	0.0017	0.0129	TNFRSF25	tumor necrosis factor receptor superfamily, member 25	Multiple_Complex
TC0100012453.hg.1	11.89	6.36	46.28	2.65e-27	6.96e-24	TNFRSF4	tumor necrosis factor receptor superfamily, member 4	Multiple_Complex
TC0100012734.hg.1	18.38	9.74	399.46	1.57e-30	8.44e-27	TNFRSF9	tumor necrosis factor receptor superfamily, member 9	Coding
TC1300010000.hg.1	5.39	6.84	-2.73	1.07e-05	0.0002	TNFSF13B	tumor necrosis factor (ligand) superfamily, member 13b	Multiple_Complex
TC1900009442.hg.1	10.5	9.18	2.5	1.2e-13	1.87e-11	TNFSF14	tumor necrosis factor (ligand) superfamily, member 14	Multiple_Complex
TC0300013108.hg.1	7.94	10	-4.17	0.0014	0.0107	TNIK	TRAF2 and NCK interacting kinase	Multiple_Complex
TC0400009784.hg.1	9.62	8.25	2.58	3.15e-10	2.44e-08	TNIP2	TNFAIP3 interacting protein 2	Multiple_Complex
TC0300011172.hg.1	5.69	7.14	-2.72	3.25e-09	1.88e-07	TNNC1	troponin C type 1 (slow)	Multiple_Complex
TC1600007262.hg.1	9.64	10.76	-2.19	0.0077	0.0404	TNRC6A	trinucleotide repeat containing 6A	Multiple_Complex
TC2200007419.hg.1	10.26	11.94	-3.2	7.95e-08	3.07e-06	TNRC6B	trinucleotide repeat containing 6B	Multiple_Complex
TC1700009032.hg.1	7.66	8.67	-2.01	8.57e-06	0.0002	TNRC6C	trinucleotide repeat containing 6C	Multiple_Complex
TC1700011121.hg.1	11.13	12.72	-3.01	2e-15	4.28e-13	TOB1	transducer of ERBB2, 1	Multiple_Complex
TC2000009204.hg.1	10.94	9.28	3.16	6.22e-13	8.5e-11	TOMM34	translocase of outer mitochondrial membrane 34	Multiple_Complex
TC0700010453.hg.1	15.42	16.48	-2.08	2.93e-09	1.74e-07	TOMM7	translocase of outer mitochondrial membrane 7 homolog (yeast)	Multiple_Complex
TC2200008112.hg.1	8.96	10.3	-2.52	1.32e-05	0.0002	TOP3B	topoisomerase (DNA) III beta	Multiple_Complex
TC1200008933.hg.1	8.17	9.52	-2.54	3.91e-06	8.47e-05	TPCN1	two pore segment channel 1	Multiple_Complex
TC0700012917.hg.1	6.14	7.29	-2.22	0.0002	0.0025	TPK1	thiamin pyrophosphokinase 1	Multiple_Complex
TC0900009949.hg.1	5.72	7.77	-4.14	2.01e-05	0.0003	TPM2	tropomyosin 2 (beta)	Multiple_Complex
TC1300007884.hg.1	8.65	9.73	-2.12	4.96e-09	2.73e-07	TPP2	tripeptidyl peptidase II	Multiple_Complex
TC0300013915.hg.1	6.13	8.62	-5.61	0.001	0.008	TPRG1	tumor protein p63 regulated 1	Multiple_Complex
TC0100011458.hg.1	8.99	10.76	-3.4	4.16e-11	3.89e-09	TRAF3IP3	TRAF3 interacting protein 3	Multiple_Complex
TC0100011487.hg.1	5.67	6.81	-2.21	0.0001	0.0016	TRAF5	TNF receptor-associated factor 5	Multiple_Complex
TC0600012040.hg.1	7.73	9.13	-2.64	2.29e-10	1.81e-08	TRAM2	translocation associated membrane protein 2	Multiple_Complex
TC0300010714.hg.1	6.69	8.92	-4.7	6.52e-15	1.26e-12	TRANK1	tetratricopeptide repeat and ankyrin repeat containing 1	Multiple_Complex
TC0400009467.hg.1	8.52	10.04	-2.86	0.0005	0.0048	TRAPPC11	trafficking protein particle complex 11	Multiple_Complex
TC0600011823.hg.1	9.31	10.78	-2.77	6.07e-06	0.0001	TRERF1	transcriptional regulating factor 1	Multiple_Complex
TC0800008801.hg.1	6.89	5.3	3	9.42e-13	1.25e-10	TRIB1	tribbles pseudokinase 1	Multiple_Complex
TC0900010968.hg.1	8.99	10.42	-2.7	2.63e-07	8.53e-06	TRIM14	tripartite motif containing 14	Multiple_Complex
TC0700013594.hg.1	6.67	7.83	-2.22	1.18e-05	0.0002	TRIM4	tripartite motif containing 4	Multiple_Complex
TC0500013130.hg.1	7.11	8.52	-2.65	5.66e-08	2.3e-06	TRIM52	tripartite motif containing 52	Multiple_Complex
TC0700008579.hg.1	7.08	8.1	-2.03	0.0022	0.0155	TRIM56	tripartite motif containing 56	Multiple_Complex
TC1500010732.hg.1	7.92	6.49	2.71	7.44e-09	3.87e-07	TRIM69	tripartite motif containing 69	Multiple_Complex
TC1900006819.hg.1	9.39	7.79	3.02	7.34e-11	6.59e-09	TRIP10	thyroid hormone receptor interactor 10	Multiple_Complex
TC0X00010473.hg.1	9.77	12	-4.68	1.97e-11	1.96e-09	TSC22D3	TSC22 domain family, member 3	Coding
TC2000007760.hg.1	4.26	5.37	-2.16	0.0002	0.0019	TSHZ2	teashirt zinc finger homeobox 2	Coding
TC0100015364.hg.1	5.16	6.59	-2.68	0.0003	0.0035	TSPAN2	tetraspanin 2	Multiple_Complex
TC0600012960.hg.1	8.27	9.33	-2.09	5.1e-07	1.49e-05	TSPYL1	TSPY-like 1	Coding
TC0100018207.hg.1	7.24	8.68	-2.71	7.78e-05	0.001	TSSK3	testis-specific serine kinase 3	Coding
TC2200008630.hg.1	6.21	5.2	2.01	3.68e-07	1.13e-05	TST	thiosulfate sulfurtransferase (rhodanese)	Multiple_Complex
TC1100009078.hg.1	6.46	7.94	-2.79	1.43e-06	3.63e-05	TTC12	tetratricopeptide repeat domain 12	Multiple_Complex
TC0300009625.hg.1	7.68	8.82	-2.21	8.09e-08	3.11e-06	TTC14	tetratricopeptide repeat domain 14	Multiple_Complex
TC1100007366.hg.1	10.46	11.56	-2.14	0.0064	0.0352	TTC17	tetratricopeptide repeat domain 17	Multiple_Complex
TC0200016746.hg.1	5.92	7.1	-2.27	0.0004	0.0041	TTC21B	tetratricopeptide repeat domain 21B	NonCoding
TC0100014275.hg.1	6.73	8.06	-2.52	6.53e-08	2.6e-06	TTC22	tetratricopeptide repeat domain 22	Multiple_Complex
TC2100007072.hg.1	11.07	12.25	-2.26	4.77e-07	1.41e-05	TTC3	tetratricopeptide repeat domain 3	Multiple_Complex
TC0200011885.hg.1	8.18	9.29	-2.17	1.92e-05	0.0003	TTC32	tetratricopeptide repeat domain 32	Multiple_Complex
TC0900012209.hg.1	5.89	7.26	-2.58	8.86e-06	0.0002	TTC39B	tetratricopeptide repeat domain 39B	Multiple_Complex
TC1400009967.hg.1	5.42	4.39	2.04	1.6e-05	0.0003	TTC7B	tetratricopeptide repeat domain 7B	Multiple_Complex
TC1400007584.hg.1	5.79	7.81	-4.06	3.91e-07	1.18e-05	TTC9	tetratricopeptide repeat domain 9	Coding
TC0900011805.hg.1	5.84	7.12	-2.43	2.42e-06	5.72e-05	TTF1	transcription termination factor, RNA polymerase I	Multiple_Complex
TC0300013787.hg.1	9.26	10.64	-2.6	4.88e-08	2.04e-06	TTLL3	tubulin tyrosine ligase-like family member 3	Multiple_Complex
TC1200010616.hg.1	16.88	15.37	2.85	2.74e-16	7.64e-14	TUBA1B	tubulin, alpha 1b	Multiple_Complex
TC1200012624.hg.1	13.43	11.54	3.71	6.74e-19	3.08e-16	TUBA1C	tubulin, alpha 1c	Multiple_Complex
TC0200015771.hg.1	13.29	12.25	2.05	4.44e-10	3.25e-08	TUBA4A	tubulin, alpha 4a	Multiple_Complex
TC0600007544.hg.1	12.32	11.21	2.15	2.33e-09	1.42e-07	TUBB	tubulin, beta class I	Multiple_Complex
TC0900009274.hg.1	10.56	9.17	2.63	1.16e-11	1.22e-09	TUBB4B	tubulin, beta 4B class IVb	Multiple_Complex
TC1800006635.hg.1	7.7	6.49	2.32	1.1e-08	5.55e-07	TWSG1	twisted gastrulation BMP signaling modulator 1	Multiple_Complex
TC0400010615.hg.1	6.01	7.04	-2.04	0.0001	0.0017	TXK	TXK tyrosine kinase	Multiple_Complex
TC0900011177.hg.1	16.47	14.79	3.2	4.76e-16	1.2e-13	TXN	thioredoxin	Multiple_Complex
TC1700006702.hg.1	12.61	11.28	2.5	2.96e-09	1.74e-07	TXNDC17	thioredoxin domain containing 17	Multiple_Complex
TC0100015598.hg.1	11.3	13.12	-3.53	5.54e-19	2.58e-16	TXNIP	thioredoxin interacting protein	Multiple_Complex
TC1800006448.hg.1	7.73	5.97	3.4	1.15e-10	9.97e-09	TYMS	thymidylate synthetase	Multiple_Complex
TC1900011930.hg.1	11.07	12.3	-2.35	2.75e-09	1.65e-07	U2AF1L4	U2 small nuclear RNA auxiliary factor 1-like 4	Multiple_Complex
TC0300007393.hg.1	7.36	8.78	-2.68	2.68e-09	1.62e-07	UBA7	Memczak2013 ANTISENSE, coding, INTERNAL, intronic best transcript NM_003335	NonCoding
TC0300011081.hg.1	9.94	11.59	-3.13	1.58e-13	2.36e-11	UBA7; MIR5193	ubiquitin-like modifier activating enzyme 7; microRNA 5193	Multiple_Complex
TC2100007254.hg.1	12.35	13.38	-2.04	7.07e-08	2.78e-06	UBASH3A	ubiquitin associated and SH3 domain containing A	Multiple_Complex
TC0400008284.hg.1	4.57	5.99	-2.68	1.73e-05	0.0003	UBE2D3	Memczak2013 ANTISENSE, coding, INTERNAL, intronic best transcript NM_181893	NonCoding
TC0200016607.hg.1	11.51	10.2	2.48	5.29e-08	2.17e-06	UBE2F	ubiquitin-conjugating enzyme E2F (putative)	Multiple_Complex
TC1200011535.hg.1	11.76	10.69	2.09	3.05e-12	3.76e-10	UBE2N	ubiquitin conjugating enzyme E2N	Multiple_Complex
TC0600008050.hg.1	8.94	10.13	-2.28	0.0001	0.0015	UBR2	ubiquitin protein ligase E3 component n-recognin 2	Multiple_Complex
TC0800011314.hg.1	5.92	7.12	-2.3	0.0026	0.0176	UBR5	ubiquitin protein ligase E3 component n-recognin 5	Multiple_Complex
TC0100018315.hg.1	10.11	8.11	4.02	2.99e-19	1.6e-16	UCK2; MIR3658	uridine-cytidine kinase 2; microRNA 3658	Multiple_Complex
TC1200011671.hg.1	11.45	10.09	2.57	1.88e-05	0.0003	UHRF1BP1L	UHRF1 binding protein 1-like	Multiple_Complex
TC0600009819.hg.1	6.74	5.54	2.3	1.22e-07	4.37e-06	ULBP2	UL16 binding protein 2	Coding
TC1300008179.hg.1	10.15	11.19	-2.06	0.0016	0.0121	UPF3A	UPF3 regulator of nonsense transcripts homolog A (yeast)	Multiple_Complex
TC0700013604.hg.1	11.21	12.22	-2.01	0.0001	0.0015	UPK3BL; POLR2J2	uroplakin 3B-like; polymerase (RNA) II (DNA directed) polypeptide J2	Multiple_Complex
TC2000008968.hg.1	7.14	8.22	-2.11	0.0006	0.0053	UQCC1	ubiquinol-cytochrome c reductase complex assembly factor 1	Multiple_Complex
TC1100012358.hg.1	7.31	8.74	-2.68	0.0008	0.007	USP28	ubiquitin specific peptidase 28	Multiple_Complex
TC1500007529.hg.1	12.07	13.22	-2.21	3.65e-12	4.4e-10	USP3	ubiquitin specific peptidase 3	Multiple_Complex
TC1500007531.hg.1	6.49	7.62	-2.19	5.43e-05	0.0008	USP3	Memczak2013 ALT_ACCEPTOR, ALT_DONOR, coding, INTERNAL, intronic best transcript NM_006537	NonCoding
TC1200008606.hg.1	7.9	6.6	2.47	8.49e-06	0.0002	UTP20	UTP20 small subunit (SSU) processome component	Multiple_Complex
TC1600008220.hg.1	11.44	10.18	2.39	3.36e-07	1.05e-05	UTP4	UTP4 small subunit (SSU) processome component	Multiple_Complex
TC0600009712.hg.1	9.85	11.6	-3.36	1.82e-08	8.74e-07	UTRN	utrophin	Multiple_Complex
TC1200009734.hg.1	10.07	11.56	-2.81	1.6e-05	0.0003	VAMP1	vesicle associated membrane protein 1	Multiple_Complex
TC1400010195.hg.1	14.55	10.71	14.34	1.04e-24	1.24e-21	WARS	tryptophanyl-tRNA synthetase	Multiple_Complex
TC1900008329.hg.1	11.51	10.36	2.22	9.03e-09	4.62e-07	VASP	vasodilator-stimulated phosphoprotein	Multiple_Complex
TC0100009221.hg.1	6.24	4.94	2.46	2.66e-07	8.6e-06	VCAM1	vascular cell adhesion molecule 1	Multiple_Complex
TC1200010559.hg.1	9.76	7.65	4.32	6.97e-18	2.67e-15	VDR	vitamin D (1,25- dihydroxyvitamin D3) receptor	Multiple_Complex
TC0200015463.hg.1	7.92	5.95	3.9	1.38e-09	8.85e-08	WDR12	WD repeat domain 12	Multiple_Complex
TC0400007280.hg.1	5.35	6.77	-2.67	8.69e-05	0.0011	WDR19	WD repeat domain 19	Multiple_Complex
TC0600014006.hg.1	5.43	6.84	-2.65	7.02e-07	1.95e-05	WDR27	WD repeat domain 27	Multiple_Complex
TC0200007111.hg.1	10.38	9.34	2.06	8.02e-07	2.18e-05	WDR43; SNORD53	WD repeat domain 43; small nucleolar RNA, C/D box 53	Multiple_Complex
TC0200008080.hg.1	7.12	8.31	-2.28	3.53e-09	2.01e-07	WDR54	WD repeat domain 54	Multiple_Complex
TC1500010140.hg.1	6.7	7.76	-2.09	0.0013	0.0102	WDR61	WD repeat domain 61	Multiple_Complex
TC0100015273.hg.1	10.1	8.92	2.27	8.88e-07	2.39e-05	WDR77	WD repeat domain 77	Multiple_Complex
TC1500008100.hg.1	8.89	10.14	-2.38	5.86e-10	4.13e-08	WHAMM	WAS protein homolog associated with actin, golgi membranes and microtubules	Multiple_Complex
TC1500010658.hg.1	8.19	6.96	2.35	1.22e-12	1.61e-10	VIMP	VCP-interacting membrane selenoprotein	Multiple_Complex
TC0200014995.hg.1	13.45	14.8	-2.54	9.23e-10	6.25e-08	WIPF1	WAS/WASL interacting protein family, member 1	Multiple_Complex
TC0600013205.hg.1	7.53	9.65	-4.33	2.02e-09	1.24e-07	VNN2	vanin 2	Multiple_Complex
TC0700011147.hg.1	4.32	5.5	-2.27	0.0065	0.0353	VOPP1	Jeck2013 ALT_ACCEPTOR, ALT_DONOR, coding, INTERNAL, intronic best transcript NM_030796	NonCoding
TSUnmapped00000291.hg.1	5.01	6.17	-2.23	2.81e-08	1.28e-06	VPS11	VPS11, CORVET/HOPS core subunit [Source:HGNC Symbol;Acc:HGNC:14583]	Coding
TC1100009237.hg.1	9	10.03	-2.04	8.5e-06	0.0002	VPS11	vacuolar protein sorting 11 homolog (S. cerevisiae)	Multiple_Complex
TC1500009182.hg.1	7.78	9.06	-2.42	0.0002	0.0018	VPS39	vacuolar protein sorting 39 homolog (S. cerevisiae)	Multiple_Complex
TC1700007319.hg.1	12.58	14.3	-3.28	0.0007	0.0062	WSB1	WD repeat and SOCS box containing 1	Multiple_Complex
TC0X00008080.hg.1	5.73	8.16	-5.37	2.35e-17	8.13e-15	VSIG1	V-set and immunoglobulin domain containing 1	Multiple_Complex
TC1600008505.hg.1	8.95	10.35	-2.64	1.28e-05	0.0002	WWOX	WW domain containing oxidoreductase	Multiple_Complex
TC0100010532.hg.1	14.92	7.95	125.62	6.19e-34	4.59e-30	XCL1	chemokine (C motif) ligand 1	Coding
TC0100016337.hg.1	15.1	8.83	77.16	6.42e-34	4.59e-30	XCL2	chemokine (C motif) ligand 2	Coding
TC0300010358.hg.1	11.06	12.7	-3.12	2.01e-06	4.85e-05	XPC	xeroderma pigmentosum, complementation group C	Multiple_Complex
TC2200009277.hg.1	5.56	6.7	-2.2	0.008	0.0414	XPNPEP3	X-prolyl aminopeptidase 3, mitochondrial	Multiple_Complex
TC1300008267.hg.1	5.62	6.67	-2.08	0.0005	0.0045	XPO4	exportin 4	Multiple_Complex
TC1100011280.hg.1	8.45	7.02	2.69	6.81e-09	3.6e-07	YIF1A	Yip1 interacting factor homolog A (S. cerevisiae)	Multiple_Complex
TC2200008103.hg.1	6.16	7.48	-2.49	8.18e-08	3.14e-06	YPEL1	yippee like 1	Multiple_Complex
TC1600009952.hg.1	8.54	10.64	-4.29	6.78e-14	1.09e-11	YPEL3	yippee like 3	Multiple_Complex
TC1100010903.hg.1	4.68	6.25	-2.97	4.45e-08	1.9e-06	YPEL4	yippee like 4	Multiple_Complex

## Sheet: CMVvsNA
ID	CMV Avg (log2)	NA Avg (log2)	Fold Change	P-val	FDR P-val	Gene Symbol	Description	Group
TC0X00010643.hg.1	13.49	15.07	-2.99	2.66e-14	2.28e-12	SEPT6	septin 6	Multiple_Complex
TC1700008995.hg.1	10.34	13.41	-8.43	2.83e-23	1.01e-20	SEPT9	septin 9	Multiple_Complex
TC1200009847.hg.1	7.74	5.06	6.41	5e-07	9.71e-06	A2M	alpha-2-macroglobulin	Multiple_Complex
TC0900010920.hg.1	7.49	6.47	2.03	9.27e-05	0.001	AAED1	AhpC/TSA antioxidant enzyme domain containing 1	Multiple_Complex
TC1900006508.hg.1	6.95	8.83	-3.67	9.77e-06	0.0001	ABCA7	ATP binding cassette subfamily A member 7	Multiple_Complex
TC1200010413.hg.1	7.45	9.54	-4.24	3.6e-09	1.15e-07	ABCD2	ATP binding cassette subfamily D member 2	Multiple_Complex
TC2100007241.hg.1	3.86	5.26	-2.64	9.3e-05	0.001	ABCG1	ATP binding cassette subfamily G member 1	Multiple_Complex
TC1000011904.hg.1	13.27	16.43	-8.91	1.68e-19	3.39e-17	ABLIM1	actin binding LIM protein 1	Multiple_Complex
TC1700010488.hg.1	7.57	6.41	2.22	0.0002	0.0019	ACACA	acetyl-CoA carboxylase alpha	Multiple_Complex
TC1200008795.hg.1	5.81	6.95	-2.21	0.0011	0.0084	ACACB	acetyl-CoA carboxylase beta	Multiple_Complex
TC0300013635.hg.1	9.57	10.79	-2.33	3.2e-06	5.06e-05	ACAP2	ArfGAP with coiled-coil, ankyrin repeat and PH domains 2	Multiple_Complex
TC0200011219.hg.1	6.31	7.86	-2.91	1.55e-05	0.0002	ACKR3	atypical chemokine receptor 3	Multiple_Complex
TC1700010693.hg.1	11.44	10.09	2.56	5.21e-09	1.6e-07	ACLY	ATP citrate lyase	Multiple_Complex
TC0X00009250.hg.1	8.27	6.08	4.57	1.97e-20	4.35e-18	ACOT9	acyl-CoA thioesterase 9	Multiple_Complex
TC1100010730.hg.1	7.18	6.13	2.06	1.61e-06	2.76e-05	ACP2	acid phosphatase 2, lysosomal	Multiple_Complex
TC0400012621.hg.1	5.52	4.23	2.45	1.68e-05	0.0002	ACSL1	acyl-CoA synthetase long-chain family member 1	Multiple_Complex
TC1600011362.hg.1	5.03	7.31	-4.84	2.84e-10	1.16e-08	ACSM3	acyl-CoA synthetase medium-chain family member 3	Multiple_Complex
TC1000011370.hg.1	10.47	8.8	3.17	8.3e-08	1.93e-06	ACTA2	actin, alpha 2, smooth muscle, aorta	Multiple_Complex
TC1700012052.hg.1	15.22	14.07	2.21	2.71e-09	8.97e-08	ACTG1	actin gamma 1	Multiple_Complex
TC1400009529.hg.1	6.39	13.22	-113.82	5.8e-28	4.44e-25	ACTN1; HMGN1P3	actinin, alpha 1; high mobility group nucleosome binding domain 1 pseudogene 3	Multiple_Complex
TC1900008020.hg.1	13.06	9.52	11.62	2.32e-19	4.57e-17	ACTN4	actinin, alpha 4	Multiple_Complex
TC0200014694.hg.1	6.73	8.01	-2.42	7.04e-05	0.0008	ACVR1C	activin A receptor type IC	Multiple_Complex
TC0500012599.hg.1	8.08	4.59	11.2	3.84e-19	7.23e-17	ADAM19	ADAM metallopeptidase domain 19	Multiple_Complex
TC0700013500.hg.1	9.06	6.32	6.69	6.27e-14	5e-12	ADAP1	ArfGAP with dual PH domains 1	Multiple_Complex
TC0600013425.hg.1	8.73	7.45	2.43	0.0044	0.0265	ADAT2	adenosine deaminase, tRNA-specific 2	Multiple_Complex
TC0200011991.hg.1	5.64	4.03	3.05	5.38e-10	2.08e-08	ADCY3	adenylate cyclase 3	Multiple_Complex
TC1600008005.hg.1	9.3	3.89	42.5	4.32e-16	4.85e-14	ADGRG1	adhesion G protein-coupled receptor G1	Multiple_Complex
TC1600008003.hg.1	8.78	4.27	22.81	1.66e-19	3.39e-17	ADGRG5	adhesion G protein-coupled receptor G5	Multiple_Complex
TC0300008482.hg.1	4.83	3.74	2.13	1.84e-05	0.0002	ADPRH	ADP-ribosylarginine hydrolase	Multiple_Complex
TC1700006877.hg.1	9	11.55	-5.85	9.27e-21	2.16e-18	ADPRM	ADP-ribose/CDP-alcohol diphosphatase, manganese-dependent	Multiple_Complex
TC2000008001.hg.1	11.76	10	3.4	6.09e-09	1.83e-07	ADRM1	adhesion regulating molecule 1	Multiple_Complex
TC0700007370.hg.1	5.01	6.69	-3.2	6.77e-09	2.02e-07	AEBP1; MIR4649	AE binding protein 1; microRNA 4649	Multiple_Complex
TC1900009272.hg.1	9.53	10.79	-2.38	1.56e-08	4.35e-07	AES	amino-terminal enhancer of split	Multiple_Complex
TC0400009953.hg.1	6.83	4.57	4.78	2.35e-08	6.28e-07	AFAP1	actin filament associated protein 1	Multiple_Complex
TC0700008552.hg.1	10.81	8.91	3.74	6.03e-07	1.15e-05	AGFG2	ArfGAP with FG repeats 2	Multiple_Complex
TC0700009394.hg.1	6.14	5.08	2.08	0.0008	0.0064	AGK	acylglycerol kinase	Multiple_Complex
TC0800012474.hg.1	10.86	9.62	2.37	2.21e-05	0.0003	AGO2	argonaute RISC catalytic component 2	Multiple_Complex
TC0100007784.hg.1	7.2	5.81	2.62	1.92e-05	0.0002	AGO4	argonaute RISC catalytic component 4	Multiple_Complex
TC0900011992.hg.1	8.2	6.66	2.91	5.3e-07	1.02e-05	AGPAT2	1-acylglycerol-3-phosphate O-acyltransferase 2	Multiple_Complex
TC0200010100.hg.1	7.83	6.75	2.12	0.0003	0.003	AGPS	alkylglycerone phosphate synthase	Multiple_Complex
TC0700006795.hg.1	13.21	11.54	3.18	3.5e-06	5.48e-05	AHR	aryl hydrocarbon receptor	Multiple_Complex
TC0600007598.hg.1	5.76	11.12	-41.02	2.54e-21	6.33e-19	AIF1	allograft inflammatory factor 1	Multiple_Complex
TC0600008981.hg.1	9.39	7.59	3.48	5.06e-10	1.97e-08	AIM1	absent in melanoma 1	Multiple_Complex
TC0100016086.hg.1	9.44	6.69	6.71	1.64e-11	8.5e-10	AIM2	absent in melanoma 2	Multiple_Complex
TC0700006634.hg.1	9.43	8.42	2.02	1.22e-05	0.0002	AIMP2	aminoacyl tRNA synthetase complex-interacting multifunctional protein 2	Multiple_Complex
TC1500008187.hg.1	12.45	11.42	2.03	2.07e-05	0.0003	AKAP13; MIR7706	A kinase (PRKA) anchor protein 13; microRNA 7706	Multiple_Complex
TC0600009446.hg.1	4.24	6.03	-3.47	4.86e-10	1.9e-08	AKAP7	A kinase (PRKA) anchor protein 7	Multiple_Complex
TC1900009867.hg.1	11.2	12.39	-2.28	2.13e-06	3.54e-05	AKAP8L	A kinase (PRKA) anchor protein 8-like	Multiple_Complex
TC1100006796.hg.1	5.35	6.35	-2	0.0007	0.0053	AKIP1	A kinase (PRKA) interacting protein 1	Multiple_Complex
TC1000006604.hg.1	3.83	5.42	-3.02	6.51e-05	0.0007	AKR1E2	aldo-keto reductase family 1, member E2	Multiple_Complex
TC1600010341.hg.1	6.78	8.3	-2.88	4.94e-05	0.0006	AKTIP	AKT interacting protein	Multiple_Complex
TC0900007187.hg.1	6.67	5.61	2.09	4.19e-06	6.44e-05	ALDH1B1	aldehyde dehydrogenase 1 family, member B1	Multiple_Complex
TC1700010200.hg.1	10.45	11.86	-2.65	3.65e-06	5.68e-05	ALDOC	aldolase C, fructose-bisphosphate	Multiple_Complex
TC1900006796.hg.1	7.14	8.74	-3.04	1.04e-06	1.86e-05	ALKBH7	alkB homolog 7	Multiple_Complex
TC1300006770.hg.1	15.03	12.83	4.61	4.51e-11	2.16e-09	ALOX5AP	arachidonate 5-lipoxygenase-activating protein	Multiple_Complex
TC0400008429.hg.1	4.78	7.05	-4.83	2.01e-12	1.22e-10	ALPK1	alpha kinase 1	Multiple_Complex
TC0200015424.hg.1	6.73	8.25	-2.88	1.17e-06	2.07e-05	ALS2CR12	amyotrophic lateral sclerosis 2 chromosome region candidate 12	Multiple_Complex
TC1700012078.hg.1	8.83	7.82	2.01	0.0008	0.0062	ALYREF	Aly/REF export factor	Multiple_Complex
TC1100012471.hg.1	11.04	13	-3.9	1.98e-07	4.26e-06	AMICA1	adhesion molecule, interacts with CXADR antigen 1	Multiple_Complex
TC0100015200.hg.1	5.45	7.43	-3.94	1.65e-15	1.7e-13	AMIGO1	adhesion molecule with Ig-like domain 1	Coding
TC1200010292.hg.1	5.5	6.74	-2.37	5.1e-05	0.0006	AMN1	antagonist of mitotic exit network 1 homolog	Multiple_Complex
TC0100018260.hg.1	6.24	8.04	-3.49	0.0001	0.0014	AMPD2	adenosine monophosphate deaminase 2	Multiple_Complex
TC0500010169.hg.1	7.09	8.51	-2.67	7.12e-06	0.0001	ANKH	ANKH inorganic pyrophosphate transport regulator	Multiple_Complex
TC1200012543.hg.1	8.31	6.76	2.93	1.9e-09	6.59e-08	ANKLE2	ankyrin repeat and LEM domain containing 2	Multiple_Complex
TC0500011125.hg.1	7.89	9.42	-2.88	6.25e-05	0.0007	ANKRA2	ankyrin repeat, family A (RFXANK-like), 2	Multiple_Complex
TC1000010113.hg.1	7.7	9.86	-4.45	7.91e-15	7.48e-13	ANKRD26	ankyrin repeat domain 26	Multiple_Complex
TC0200010837.hg.1	9.71	10.78	-2.1	0.0012	0.0087	ANKZF1	ankyrin repeat and zinc finger domain containing 1	Multiple_Complex
TC0900008173.hg.1	11.76	13.13	-2.57	4.5e-12	2.6e-10	ANP32B	acidic nuclear phosphoprotein 32 family member B	Multiple_Complex
TC1500009636.hg.1	10.66	5.84	28.24	5.59e-25	2.73e-22	ANXA2	annexin A2	Multiple_Complex
TC0500010628.hg.1	11.44	14.06	-6.13	3.07e-24	1.2e-21	ANXA2R	annexin A2 receptor	Coding
TC0700010751.hg.1	10.32	8.04	4.87	1.79e-07	3.9e-06	AOAH	acyloxyacyl hydrolase (neutrophil)	Multiple_Complex
TC0800007431.hg.1	10.5	9.14	2.55	9.7e-06	0.0001	AP3M2	adaptor-related protein complex 3, mu 2 subunit	Multiple_Complex
TC1500006683.hg.1	8.27	10.97	-6.51	8.08e-09	2.37e-07	APBA2	amyloid beta (A4) precursor protein-binding, family A, member 2	Multiple_Complex
TC1100009969.hg.1	6.44	8.06	-3.06	5.42e-10	2.09e-08	APBB1	amyloid beta (A4) precursor protein-binding, family B, member 1 (Fe65)	Multiple_Complex
TC0300007386.hg.1	6.11	4.81	2.46	2.49e-06	4.06e-05	APEH	acylaminoacyl-peptide hydrolase	Multiple_Complex
TC0200016464.hg.1	8.14	9.32	-2.28	0.0004	0.0034	APLF	aprataxin and PNKP like factor	Multiple_Complex
TC1100009521.hg.1	8.29	6.72	2.96	5.52e-05	0.0006	APLP2	amyloid beta (A4) precursor-like protein 2	Multiple_Complex
TC2000008721.hg.1	11.65	8.7	7.69	8.97e-18	1.37e-15	APMAP	adipocyte plasma membrane associated protein	Multiple_Complex
TC2200009270.hg.1	5.7	4.69	2	4.81e-09	1.49e-07	APOBEC3B	apolipoprotein B mRNA editing enzyme, catalytic polypeptide-like 3B	Coding
TC2200009271.hg.1	14.76	11.35	10.64	4.28e-27	2.74e-24	APOBEC3C	apolipoprotein B mRNA editing enzyme, catalytic polypeptide-like 3C	Multiple_Complex
TC2200009272.hg.1	11.21	8.13	8.43	1e-18	1.76e-16	APOBEC3D	apolipoprotein B mRNA editing enzyme, catalytic polypeptide-like 3D	Coding
TC2200009273.hg.1	12.26	10.3	3.88	2.26e-13	1.62e-11	APOBEC3F	apolipoprotein B mRNA editing enzyme, catalytic polypeptide-like 3F	Multiple_Complex
TC2200009274.hg.1	13.95	9.59	20.51	2e-27	1.34e-24	APOBEC3G	apolipoprotein B mRNA editing enzyme, catalytic polypeptide-like 3G	Multiple_Complex
TC2200007382.hg.1	7.29	4.88	5.3	1.67e-09	5.82e-08	APOBEC3H	apolipoprotein B mRNA editing enzyme, catalytic polypeptide-like 3H	Multiple_Complex
TC2200008588.hg.1	6.37	9.41	-8.26	1.93e-19	3.87e-17	APOL3	apolipoprotein L, 3	Multiple_Complex
TC2100007803.hg.1	7.14	8.73	-3	1.45e-07	3.21e-06	APP	amyloid beta (A4) precursor protein	Multiple_Complex
TC0900009860.hg.1	7	8.6	-3.02	1.6e-11	8.31e-10	AQP3	aquaporin 3 (Gill blood group)	Multiple_Complex
TC0400012917.hg.1	11.36	9.58	3.44	2.66e-10	1.09e-08	ARAP2	ArfGAP with RhoGAP domain, ankyrin repeat and PH domain 2	Multiple_Complex
TC1400007098.hg.1	15.34	14.14	2.29	3.93e-13	2.72e-11	ARF6	ADP-ribosylation factor 6	Multiple_Complex
TC2200009356.hg.1	10.4	8.99	2.65	7.16e-07	1.34e-05	ARFGAP3	ADP-ribosylation factor GTPase activating protein 3	Multiple_Complex
TC1500010707.hg.1	6.56	5.42	2.21	0.0039	0.024	ARHGAP11B	Rho GTPase activating protein 11B	Multiple_Complex
TC0600013147.hg.1	6.41	4.67	3.33	1.05e-07	2.4e-06	ARHGAP18	Rho GTPase activating protein 18	Multiple_Complex
TC1000010065.hg.1	7.66	6.13	2.88	1.56e-08	4.35e-07	ARHGAP21	Rho GTPase activating protein 21	Multiple_Complex
TC0200007900.hg.1	10.72	9.36	2.56	4.32e-07	8.57e-06	ARHGAP25	Rho GTPase activating protein 25	Multiple_Complex
TC0500008941.hg.1	10.44	7.99	5.48	6.07e-19	1.09e-16	ARHGAP26	Rho GTPase activating protein 26	Multiple_Complex
TC0300008467.hg.1	7.61	4.59	8.09	1.61e-12	9.84e-11	ARHGAP31	Rho GTPase activating protein 31	Multiple_Complex
TC1100012794.hg.1	4.63	6.04	-2.66	5.85e-06	8.57e-05	ARHGAP32	Rho GTPase activating protein 32	Multiple_Complex
TC1900008399.hg.1	8.66	7.34	2.49	2.82e-07	5.82e-06	ARHGAP35	Rho GTPase activating protein 35	Multiple_Complex
TC1400006851.hg.1	8.98	10.09	-2.17	0.0003	0.0025	ARHGAP5	Rho GTPase activating protein 5	Multiple_Complex
TC1900011745.hg.1	10.15	11.71	-2.94	0.0002	0.002	ARHGEF1	Rho guanine nucleotide exchange factor 1	Multiple_Complex
TC1900011746.hg.1	6.95	8.41	-2.75	1.01e-05	0.0001	ARHGEF1	Rho guanine nucleotide exchange factor 1	Multiple_Complex
TC1100009287.hg.1	8.51	5.53	7.84	1.29e-09	4.6e-08	ARHGEF12	Rho guanine nucleotide exchange factor (GEF) 12	Multiple_Complex
TC0100018507.hg.1	9.45	8.2	2.38	6.28e-07	1.19e-05	ARHGEF2	Rho/Rac guanine nucleotide exchange factor 2	Multiple_Complex
TC0X00010933.hg.1	9.3	10.3	-2.01	9.78e-05	0.001	ARHGEF6	Rac/Cdc42 guanine nucleotide exchange factor 6	Multiple_Complex
TC1000007761.hg.1	11.94	7.68	19.13	1.24e-22	4.08e-20	ARID5B	AT rich interactive domain 5B (MRF1-like)	Multiple_Complex
TC1100007168.hg.1	9.63	11.08	-2.74	1.11e-05	0.0001	ARL14EP	ADP-ribosylation factor like GTPase 14 effector protein	Multiple_Complex
TC0100016944.hg.1	9.82	8.37	2.73	1.45e-06	2.49e-05	ARL8A	ADP-ribosylation factor like GTPase 8A	Multiple_Complex
TC0X00010369.hg.1	4.77	5.87	-2.14	0.0002	0.0015	ARMCX2	armadillo repeat containing, X-linked 2	Multiple_Complex
TC0300013786.hg.1	9.17	8.16	2.01	7.88e-05	0.0008	ARPC4	actin related protein 2/3 complex subunit 4	Multiple_Complex
TC0900008742.hg.1	10	8.24	3.39	2.05e-12	1.24e-10	ARPC5L	actin related protein 2/3 complex subunit 5-like	Multiple_Complex
TC1100011643.hg.1	7.42	9.85	-5.41	2.8e-09	9.21e-08	ARRB1	arrestin, beta 1	Multiple_Complex
TC1900007358.hg.1	5.29	9.15	-14.57	2.48e-17	3.48e-15	ARRDC2	arrestin domain containing 2	Multiple_Complex
TC0500011448.hg.1	11.36	12.99	-3.1	0.0006	0.005	ARRDC3	arrestin domain containing 3	Multiple_Complex
TC1900009371.hg.1	7.77	9.29	-2.87	1.97e-07	4.24e-06	ARRDC5	arrestin domain containing 5	Coding
TC0500011228.hg.1	9.77	8.01	3.4	8.81e-11	4.02e-09	ARSB	arylsulfatase B	Multiple_Complex
TC1200007594.hg.1	3.7	6.35	-6.3	3.84e-17	5.21e-15	ASIC1	acid sensing ion channel 1	Multiple_Complex
TC1900007089.hg.1	11.66	10.48	2.28	4.96e-07	9.65e-06	ASNA1	arsA arsenite transporter, ATP-binding, homolog 1 (bacterial)	Multiple_Complex
TC0700011876.hg.1	8.75	6.96	3.46	3.16e-08	8.18e-07	ASNS	asparagine synthetase (glutamine-hydrolyzing)	Multiple_Complex
TC0100018157.hg.1	7.82	6.65	2.26	0.0001	0.0012	ATAD3A	ATPase family, AAA domain containing 3A	Multiple_Complex
TC0100011533.hg.1	6.78	4.79	3.99	5.57e-11	2.64e-09	ATF3	activating transcription factor 3	Multiple_Complex
TC1100011128.hg.1	7.49	6.38	2.16	0.0009	0.0071	ATL3	atlastin GTPase 3	Multiple_Complex
TC1100008985.hg.1	10.99	13.99	-8.03	1.11e-20	2.56e-18	ATM	ATM serine/threonine kinase	Multiple_Complex
TC0300014090.hg.1	11.74	10.69	2.07	1.68e-05	0.0002	ATP13A3	ATPase type 13A3	Multiple_Complex
TC0100010543.hg.1	7.02	5.12	3.71	2.47e-08	6.54e-07	ATP1B1	ATPase, Na+/K+ transporting, beta 1 polypeptide	Multiple_Complex
TC0300009016.hg.1	11.08	8.43	6.27	1.43e-14	1.29e-12	ATP1B3	ATPase, Na+/K+ transporting, beta 3 polypeptide	Multiple_Complex
TC1200008835.hg.1	8.47	7.25	2.33	2.42e-06	3.97e-05	ATP2A2	ATPase, Ca++ transporting, cardiac muscle, slow twitch 2	Multiple_Complex
TC0100011267.hg.1	13.78	12.42	2.56	1.02e-06	1.82e-05	ATP2B4	ATPase, Ca++ transporting, plasma membrane 4	Multiple_Complex
TC1600008646.hg.1	4.91	5.99	-2.11	0.0002	0.0022	ATP2C2	ATPase, Ca++ transporting, type 2C, member 2	Multiple_Complex
TC0900008515.hg.1	11.27	12.8	-2.88	1.81e-08	5e-07	ATP6V1G1	ATPase, H+ transporting, lysosomal 13kDa, V1 subunit G1	Multiple_Complex
TC0600014260.hg.1	4.66	6.29	-3.08	4.85e-09	1.49e-07	ATP6V1G2	ATPase, H+ transporting, lysosomal 13kDa, V1 subunit G2	Multiple_Complex
TC0400010558.hg.1	5.93	8.26	-5.03	2.75e-07	5.71e-06	ATP8A1	ATPase, aminophospholipid transporter (APLT), class I, type 8A, member 1	Multiple_Complex
TC0600010936.hg.1	6.4	5.27	2.19	0.0001	0.0014	ATXN1	Memczak2013 ALT_ACCEPTOR, ALT_DONOR, coding, INTERNAL, intronic best transcript NM_000332	NonCoding
TC0600010921.hg.1	9.06	7.52	2.92	1.45e-08	4.07e-07	ATXN1	ataxin 1	Multiple_Complex
TC0700007905.hg.1	8.9	6.15	6.73	6.76e-12	3.75e-10	AUTS2	autism susceptibility candidate 2	Multiple_Complex
TC1600008940.hg.1	8.98	7.78	2.3	0.0005	0.0044	AXIN1	Memczak2013 ALT_ACCEPTOR, ALT_DONOR, coding, INTERNAL, intronic best transcript NM_003502	NonCoding
TC0100016794.hg.1	7.07	5.63	2.7	9.18e-05	0.001	B3GALT2	UDP-Gal:betaGlcNAc beta 1,3-galactosyltransferase 2	Coding
TC0300009661.hg.1	6.39	4.99	2.63	2.48e-06	4.05e-05	B3GNT5	UDP-GlcNAc:betaGal beta-1,3-N-acetylglucosaminyltransferase 5	Multiple_Complex
TC0100008082.hg.1	7.18	5.31	3.63	1.63e-14	1.47e-12	B4GALT2	UDP-Gal:betaGlcNAc beta 1,4- galactosyltransferase, polypeptide 2	Multiple_Complex
TC2000009392.hg.1	7.7	5.43	4.83	2.3e-14	2.01e-12	B4GALT5	UDP-Gal:betaGlcNAc beta 1,4- galactosyltransferase, polypeptide 5	Multiple_Complex
TC0600012556.hg.1	6.1	7.48	-2.59	0.0002	0.0016	BACH2	Transcript Identified by AceView, Entrez Gene ID(s) 60468	Unassigned
TC0600012562.hg.1	5.18	6.55	-2.58	0.0003	0.0027	BACH2	Memczak2013 ALT_ACCEPTOR, ALT_DONOR, coding, INTERNAL, intronic best transcript NM_001170794	NonCoding
TC1400007712.hg.1	12.38	9.6	6.89	3.17e-16	3.65e-14	BATF	basic leucine zipper transcription factor, ATF-like	Multiple_Complex
TC0100017258.hg.1	12.56	7.9	25.35	3.74e-22	1.07e-19	BATF3	basic leucine zipper transcription factor, ATF-like 3	Multiple_Complex
TC0700013439.hg.1	7.2	6.19	2	8.07e-05	0.0009	BCAP29	B-cell receptor-associated protein 29	Multiple_Complex
TC1200010145.hg.1	5.83	4.83	2	8.65e-06	0.0001	BCAT1	branched chain amino-acid transaminase 1, cytosolic	Multiple_Complex
TC1500010184.hg.1	13.3	11.5	3.47	4.34e-09	1.36e-07	BCL2A1	BCL2-related protein A1	Coding
TC2000008815.hg.1	9.9	6.28	12.3	1.21e-24	5.28e-22	BCL2L1	BCL2-like 1	Multiple_Complex
TC0200008870.hg.1	11.36	9.31	4.13	9.34e-10	3.42e-08	BCL2L11	BCL2-like 11 (apoptosis facilitator)	Multiple_Complex
TC1200009192.hg.1	4.23	5.41	-2.26	5.39e-07	1.04e-05	BCL7A	B-cell CLL/lymphoma 7A	Multiple_Complex
TC1100013230.hg.1	8.18	10.19	-4.02	2.53e-11	1.27e-09	BCL9L	B-cell CLL/lymphoma 9-like	Multiple_Complex
TC0X00009427.hg.1	9.64	8.54	2.14	4.16e-06	6.4e-05	BCOR	BCL6 corepressor	Multiple_Complex
TC0X00010409.hg.1	7	8.74	-3.36	4.89e-08	1.2e-06	BEX2	brain expressed X-linked 2	Coding
TC0X00007999.hg.1	7.99	9.94	-3.86	1.54e-10	6.61e-09	BEX4	brain expressed X-linked 4	Multiple_Complex
TC0X00010382.hg.1	9.14	10.24	-2.15	9.89e-05	0.001	BEX5	brain expressed X-linked 5	Multiple_Complex
TC0300006483.hg.1	14.33	11.73	6.05	9.32e-18	1.4e-15	BHLHE40	basic helix-loop-helix family, member e40	Multiple_Complex
TC0200014160.hg.1	8.68	10.52	-3.57	1.34e-10	5.84e-09	BIN1	bridging integrator 1	Multiple_Complex
TC1100013087.hg.1	13.45	11.86	3	1.01e-06	1.81e-05	BIRC3	baculoviral IAP repeat containing 3	Multiple_Complex
TC1100012119.hg.1	10.2	8.59	3.05	4.45e-06	6.81e-05	BIRC3	Memczak2013 ANTISENSE, CDS, coding, INTERNAL best transcript NM_182962	NonCoding
TC1000012329.hg.1	10.71	12.17	-2.74	1.34e-11	7.09e-10	BNIP3	BCL2/adenovirus E1B 19kDa interacting protein 3	Multiple_Complex
TC0200013095.hg.1	10.72	9.2	2.88	5.25e-09	1.6e-07	BOLA3	bolA family member 3	Multiple_Complex
TC0800012202.hg.1	8.31	7.2	2.16	0.0004	0.0031	BOP1; MIR7112	block of proliferation 1; microRNA 7112	Multiple_Complex
TC1100013174.hg.1	7.34	8.72	-2.61	4.37e-05	0.0005	BSCL2	Berardinelli-Seip congenital lipodystrophy 2 (seipin)	Multiple_Complex
TC1900006470.hg.1	12.27	11.26	2.01	0.0006	0.0047	BSG	basigin (Ok blood group)	Multiple_Complex
TC1200008743.hg.1	6.2	8.46	-4.78	9.03e-11	4.09e-09	BTBD11	BTB (POZ) domain containing 11	Multiple_Complex
TC1200011506.hg.1	8.16	9.41	-2.38	1.61e-08	4.48e-07	BTG1; LINC01619	B-cell translocation gene 1, anti-proliferative; long intergenic non-protein coding RNA 1619	Multiple_Complex
TC0600007303.hg.1	11.49	12.67	-2.26	7.41e-06	0.0001	BTN3A1	butyrophilin, subfamily 3, member A1	Multiple_Complex
TC1000010593.hg.1	7.13	5.57	2.94	2.92e-07	6e-06	C10orf128	chromosome 10 open reading frame 128	Multiple_Complex
TC1100009040.hg.1	8.02	10.68	-6.31	9.42e-18	1.4e-15	C11orf1	chromosome 11 open reading frame 1	Coding
TC1100009335.hg.1	6.81	5.79	2.02	0.0003	0.0025	C11orf63	chromosome 11 open reading frame 63	Multiple_Complex
TC1100011260.hg.1	7.73	9.16	-2.7	2.55e-09	8.48e-08	C11orf68	chromosome 11 open reading frame 68	Multiple_Complex
TC1200006656.hg.1	13.99	15.71	-3.29	1.43e-12	8.88e-11	C12orf57; RNU7-1	chromosome 12 open reading frame 57; RNA, U7 small nuclear 1	Multiple_Complex
TC1200009235.hg.1	11.35	12.97	-3.08	7.48e-11	3.44e-09	C12orf65	chromosome 12 open reading frame 65	Multiple_Complex
TC1200011081.hg.1	6.46	8	-2.92	2.76e-10	1.13e-08	C12orf66	chromosome 12 open reading frame 66	Multiple_Complex
TC1200012700.hg.1	10.09	6.71	10.42	4.66e-16	5.18e-14	C12orf75	chromosome 12 open reading frame 75	Multiple_Complex
TC1600011358.hg.1	8.2	6.85	2.54	0.0007	0.0058	C16orf45	chromosome 16 open reading frame 45	Multiple_Complex
TC0100009417.hg.1	6.84	8.28	-2.72	1.29e-06	2.25e-05	C1orf162	chromosome 1 open reading frame 162	Multiple_Complex
TC0100010887.hg.1	10.32	6.22	17.09	3.99e-22	1.1e-19	C1orf21	chromosome 1 open reading frame 21	Multiple_Complex
TC2200009346.hg.1	6.08	7.53	-2.74	1.05e-05	0.0001	C1QTNF6	C1q and tumor necrosis factor related protein 6	NonCoding
TC0200016497.hg.1	4.83	6.07	-2.37	0.0001	0.0013	C2orf15	chromosome 2 open reading frame 15	Multiple_Complex
TC0200009350.hg.1	5.03	6.71	-3.21	3.52e-07	7.15e-06	C2orf27A	chromosome 2 open reading frame 27A	Multiple_Complex
TC0200016455.hg.1	6.57	7.83	-2.4	0.0004	0.0038	C2orf74	chromosome 2 open reading frame 74	Multiple_Complex
TC1900009443.hg.1	5.34	4.09	2.38	0.0016	0.011	C3	complement component 3	Multiple_Complex
TC0500008633.hg.1	8.7	9.72	-2.03	6.96e-08	1.65e-06	C5orf56	chromosome 5 open reading frame 56	Multiple_Complex
TC0600013144.hg.1	5.3	4.23	2.11	0.0001	0.0014	C6orf191andARHGAP18; RP1-69D17.4; RP1-69D17.3; TCONS_l2_00025470; TCONS_l2_00024911; LAMA2	Transcript Identified by AceView, Entrez Gene ID(s) 93663; 253582; Jeck2013 ALT_ACCEPTOR, ALT_DONOR, downstream_end, ncRNA, OVEXON, upstream_start best transcript TCONS_l2_00025470; Jeck2013 ALT_ACCEPTOR, ncRNA, OVEXON, upstream_start best transcript TCONS_l2_00024911; Salzman2013 ANTISENSE, CDS, coding, downstream_end, intronic, OVCODE, OVEXON, UTR3 best transcript NM_000426; Salzman2013 ANNOTAT…	NonCoding
TC0600007617.hg.1	15.11	16.68	-2.98	1.87e-16	2.21e-14	C6orf48; SNORD52; SNORD48	chromosome 6 open reading frame 48; small nucleolar RNA, C/D box 52; small nucleolar RNA, C/D box 48	Multiple_Complex
TC0700010510.hg.1	7.25	8.77	-2.88	7.36e-07	1.38e-05	C7orf31	chromosome 7 open reading frame 31	Multiple_Complex
TC0900010586.hg.1	7.46	6.09	2.59	7.9e-05	0.0008	C9orf64	chromosome 9 open reading frame 64	Multiple_Complex
TC0900009779.hg.1	5.13	7.46	-5.02	9.64e-09	2.79e-07	C9orf72	chromosome 9 open reading frame 72	Multiple_Complex
TC0900008516.hg.1	5.9	7.25	-2.55	1.39e-07	3.08e-06	C9orf91	chromosome 9 open reading frame 91	Multiple_Complex
TC0100006761.hg.1	4.72	7.01	-4.91	3.34e-11	1.64e-09	CA6	carbonic anhydrase VI	Multiple_Complex
TC0100008602.hg.1	3.22	4.41	-2.28	8.08e-06	0.0001	CACHD1	cache domain containing 1	Multiple_Complex
TC1700010563.hg.1	9.78	8.13	3.14	1.57e-09	5.53e-08	CACNB1	calcium channel, voltage-dependent, beta 1 subunit	Multiple_Complex
TC1200007535.hg.1	7.89	6.56	2.52	5.34e-06	7.93e-05	CACNB3	calcium channel, voltage-dependent, beta 3 subunit	Multiple_Complex
TC1100012389.hg.1	7.87	4.32	11.73	5.22e-13	3.55e-11	CADM1	cell adhesion molecule 1	Multiple_Complex
TC1900007108.hg.1	14.41	13.1	2.47	2.84e-09	9.32e-08	CALR	calreticulin	Multiple_Complex
TC1000011040.hg.1	9.17	11.07	-3.73	6.1e-15	5.92e-13	CAMK2G	calcium/calmodulin-dependent protein kinase II gamma	Multiple_Complex
TC0500008309.hg.1	9.76	11.77	-4.04	1.65e-10	7.02e-09	CAMK4	calcium/calmodulin-dependent protein kinase IV	Multiple_Complex
TC0500008702.hg.1	12.55	13.8	-2.38	1.95e-14	1.73e-12	CAMLG	calcium modulating ligand	Multiple_Complex
TC0100011721.hg.1	10.95	9.67	2.44	0.0015	0.0104	CAPN2	calpain 2, (m/II) large subunit	Multiple_Complex
TC0700008360.hg.1	6.99	8.08	-2.14	0.0088	0.0461	CASD1	CAS1 domain containing 1	Multiple_Complex
TC0200010445.hg.1	4.9	8.47	-11.86	6.42e-18	9.98e-16	CASP10	caspase 10	Multiple_Complex
TC0400011578.hg.1	7.97	9.2	-2.34	0.0031	0.0197	CASP6	caspase 6	Multiple_Complex
TC1600008141.hg.1	10.02	8.99	2.05	3.65e-05	0.0004	CBFB	core-binding factor, beta subunit	Multiple_Complex
TC0300011899.hg.1	13.3	12.08	2.33	4.9e-09	1.51e-07	CBLB	Cbl proto-oncogene B, E3 ubiquitin protein ligase	Multiple_Complex
TC2100007037.hg.1	6.77	8.94	-4.51	8.5e-12	4.63e-10	CBR3	carbonyl reductase 3	Multiple_Complex
TC2200007360.hg.1	5.72	7.51	-3.46	6.86e-11	3.19e-09	CBY1	chibby homolog 1 (Drosophila)	Multiple_Complex
TC1900007150.hg.1	7.33	6.22	2.15	0.0012	0.0088	CC2D1A	coiled-coil and C2 domain containing 1A	Multiple_Complex
TC1600010453.hg.1	7.18	5.87	2.48	3.47e-06	5.44e-05	CCDC102A	coiled-coil domain containing 102A	Multiple_Complex
TC0400008380.hg.1	9.12	10.37	-2.38	3.14e-08	8.12e-07	CCDC109B	coiled-coil domain containing 109B	Multiple_Complex
TC1900007355.hg.1	10.03	8.93	2.15	1.26e-07	2.84e-06	CCDC124	coiled-coil domain containing 124	Multiple_Complex
TC0500010998.hg.1	4.54	5.99	-2.73	2.7e-05	0.0003	CCDC125	coiled-coil domain containing 125	Multiple_Complex
TC0600011697.hg.1	8.94	7.29	3.16	1.44e-07	3.18e-06	CCDC167	coiled-coil domain containing 167	Coding
TC0600009622.hg.1	8.49	9.52	-2.05	1.64e-09	5.73e-08	CCDC28A	coiled-coil domain containing 28A	Multiple_Complex
TC1000010725.hg.1	12.67	10.87	3.46	2.63e-13	1.85e-11	CCDC6	coiled-coil domain containing 6	Multiple_Complex
TC1400009980.hg.1	8.36	9.4	-2.06	0.0008	0.0062	CCDC88C	coiled-coil domain containing 88C	Multiple_Complex
TC0200010980.hg.1	8.04	4.81	9.4	9.28e-07	1.68e-05	CCL20	chemokine (C-C motif) ligand 20	Multiple_Complex
TC1700010459.hg.1	13.24	5.5	213.18	1.57e-26	8.89e-24	CCL3	chemokine (C-C motif) ligand 3	Multiple_Complex
TC1700010461.hg.1	9.45	4.97	22.22	3.7e-20	7.78e-18	CCL3L3; CCL3L1	chemokine (C-C motif) ligand 3-like 3; chemokine (C-C motif) ligand 3-like 1	Multiple_Complex
TC1700007620.hg.1	14.15	5.46	415.31	4.04e-38	1.73e-34	CCL4L2; CCL4; CCL4L1	chemokine (C-C motif) ligand 4-like 2; chemokine (C-C motif) ligand 4; chemokine (C-C motif) ligand 4-like 1	Multiple_Complex
TC1700007626.hg.1	12.15	5.97	72.51	2.29e-24	9.15e-22	CCL4L2; CCL4L1	chemokine (C-C motif) ligand 4-like 2; chemokine (C-C motif) ligand 4-like 1	Multiple_Complex
TC1700010447.hg.1	11.67	7.79	14.8	7.33e-17	9.48e-15	CCL5	chemokine (C-C motif) ligand 5	Coding
TC1200006555.hg.1	14.79	12.52	4.81	2.37e-16	2.76e-14	CCND2	cyclin D2	Multiple_Complex
TC0600011809.hg.1	12.87	14.27	-2.64	6.2e-10	2.35e-08	CCND3	cyclin D3	Multiple_Complex
TC1900007688.hg.1	4.96	6.65	-3.23	1.95e-06	3.27e-05	CCNE1	cyclin E1	Multiple_Complex
TC0500009319.hg.1	9.89	11.5	-3.06	8.01e-11	3.68e-09	CCNG1	cyclin G1	Multiple_Complex
TC0400012818.hg.1	9.17	10.36	-2.29	0.0004	0.0034	CCNG2	cyclin G2	Multiple_Complex
TC0200010615.hg.1	7.93	6.89	2.05	1.42e-05	0.0002	CCNYL1; MIR4775	cyclin Y like 1; microRNA 4775	Multiple_Complex
TC0300007256.hg.1	5.33	4.31	2.03	0.0008	0.0059	CCR2	chemokine (C-C motif) receptor 2	Multiple_Complex
TC0300006985.hg.1	8.78	4.61	17.96	1.19e-11	6.38e-10	CCR4	chemokine (C-C motif) receptor 4	Coding
TC0300007257.hg.1	8.72	5.23	11.21	7.51e-15	7.19e-13	CCR5	chemokine (C-C motif) receptor 5 (gene/pseudogene)	Multiple_Complex
TC1700010630.hg.1	15.81	18.23	-5.35	1.06e-10	4.68e-09	CCR7	chemokine (C-C motif) receptor 7	Coding
TC0300007259.hg.1	7.34	5.79	2.92	1.51e-05	0.0002	CCRL2	chemokine (C-C motif) receptor-like 2	Multiple_Complex
TC0100015994.hg.1	11.08	9.59	2.81	2.11e-13	1.52e-11	CCT3	chaperonin containing TCP1, subunit 3 (gamma)	Multiple_Complex
TC0500006730.hg.1	14.45	12.98	2.78	3.1e-11	1.54e-09	CCT5	chaperonin containing TCP1, subunit 5 (epsilon)	Multiple_Complex
TC1100006494.hg.1	5.82	4.65	2.25	0.0051	0.0298	CD151	CD151 molecule (Raph blood group)	Multiple_Complex
TC0100009742.hg.1	6.68	4.23	5.44	2.53e-14	2.19e-12	CD160	CD160 molecule	Multiple_Complex
TC0300012007.hg.1	5.81	6.96	-2.22	0.0061	0.0347	CD200R1	CD200 receptor 1	Coding
TC1800008977.hg.1	9.91	6.73	9.05	8.47e-10	3.13e-08	CD226	CD226 molecule	Multiple_Complex
TC0100016145.hg.1	6.36	4.66	3.25	5.81e-08	1.4e-06	CD244	CD244 molecule, natural killer cell receptor 2B4	Multiple_Complex
TC1100011282.hg.1	4.87	10.57	-52.26	5.55e-35	1.49e-31	CD248	CD248 molecule, endosialin	Coding
TC1200012583.hg.1	8.55	11.27	-6.58	1.04e-15	1.1e-13	CD27	CD27 molecule	Multiple_Complex
TC0900006559.hg.1	9.94	7.51	5.37	1.01e-14	9.36e-13	CD274	CD274 molecule	Multiple_Complex
TC0200010523.hg.1	8.85	10.38	-2.88	1.84e-06	3.11e-05	CD28	CD28 molecule	Coding
TC1700008852.hg.1	8.33	7.26	2.09	0.003	0.0194	CD300A	CD300a molecule	Multiple_Complex
TC1900008533.hg.1	12.73	14.48	-3.35	1.38e-13	1.03e-11	CD37	CD37 molecule	Multiple_Complex
TC1100007790.hg.1	9.72	10.83	-2.17	2.86e-06	4.57e-05	CD5	CD5 molecule	Multiple_Complex
TC0100007451.hg.1	6.67	7.75	-2.12	0.0003	0.0026	CD52	CD52 molecule	Multiple_Complex
TC0100011406.hg.1	13.6	15.12	-2.87	1.04e-12	6.66e-11	CD55	CD55 molecule, decay accelerating factor for complement (Cromer blood group)	Multiple_Complex
TC0100015397.hg.1	11.93	8.45	11.17	3.85e-22	1.09e-19	CD58	CD58 molecule	Multiple_Complex
TC1200010866.hg.1	15.1	12.76	5.09	2.71e-15	2.73e-13	CD63	CD63 molecule	Multiple_Complex
TC1900009439.hg.1	7.63	4.32	9.92	5.59e-21	1.35e-18	CD70	CD70 molecule	Multiple_Complex
TC1900008166.hg.1	5.99	7	-2.01	7.17e-08	1.69e-06	CD79A	CD79a molecule, immunoglobulin-associated alpha	Multiple_Complex
TC0300012123.hg.1	5.79	4.69	2.15	2.72e-06	4.4e-05	CD80	CD80 molecule	Multiple_Complex
TC1100006576.hg.1	9.75	8.5	2.38	4.27e-05	0.0005	CD81	CD81 molecule	Multiple_Complex
TC1100007394.hg.1	9.54	6.27	9.67	3.95e-15	3.89e-13	CD82	CD82 molecule	Multiple_Complex
TC0600007012.hg.1	10.38	6.86	11.42	3.65e-18	6.02e-16	CD83	CD83 molecule	Multiple_Complex
TC0100016137.hg.1	9.5	8.37	2.18	0.0069	0.0379	CD84	CD84 molecule	Multiple_Complex
TC0200013323.hg.1	12.3	10.61	3.22	8.4e-10	3.11e-08	CD8A	CD8a molecule	Multiple_Complex
TC0X00006477.hg.1	13.68	12.34	2.53	3.16e-09	1.02e-07	CD99	CD99 molecule	Multiple_Complex
TC0Y00006476.hg.1	13.34	11.93	2.65	1.2e-09	4.32e-08	CD99	Homo sapiens CD99 molecule (CD99), transcript variant 2, mRNA.; Homo sapiens CD99 molecule (CD99), transcript variant 3, mRNA.; Homo sapiens CD99 molecule (CD99), transcript variant 1, mRNA.; CD99 molecule [Source:HGNC Symbol;Acc:HGNC:7082]; Homo sapiens CD99 molecule, mRNA (cDNA clone MGC:2282 IMAGE:3161673), complete cds.; Homo sapiens CD99 molecule, mRNA (cDNA clone MGC:3938 IMAGE:2906143), co…	Multiple_Complex
TC0900012256.hg.1	7.73	6.07	3.16	8.25e-06	0.0001	CDC14B	cell division cycle 14B	Multiple_Complex
TC2000006559.hg.1	8.05	9.53	-2.8	2.8e-07	5.78e-06	CDC25B	cell division cycle 25B	Multiple_Complex
TC0600009112.hg.1	10.69	11.71	-2.03	0.0003	0.0028	CDC40	cell division cycle 40	Multiple_Complex
TC0500013225.hg.1	8.58	10.27	-3.23	8.05e-05	0.0009	CDC42SE2	CDC42 small effector 2	NonCoding
TC0200009994.hg.1	4.78	3.68	2.14	0.0003	0.0027	CDCA7	cell division cycle associated 7	Multiple_Complex
TC0700010435.hg.1	6.15	9.34	-9.14	7.51e-17	9.59e-15	CDCA7L	cell division cycle associated 7-like	Multiple_Complex
TC1600008209.hg.1	5.67	4.39	2.43	0.0011	0.0081	CDH1	cadherin 1, type 1	Multiple_Complex
TC0X00007132.hg.1	8.08	7	2.11	0.0023	0.0151	CDK16	cyclin-dependent kinase 16	Multiple_Complex
TC1100011338.hg.1	10.92	9.7	2.33	2.56e-07	5.33e-06	CDK2AP2	cyclin-dependent kinase 2 associated protein 2	Multiple_Complex
TC0700011785.hg.1	10.52	7.34	9.04	6.07e-25	2.89e-22	CDK6	cyclin-dependent kinase 6	Multiple_Complex
TC0600007847.hg.1	8.65	6.1	5.82	9.65e-13	6.27e-11	CDKN1A	cyclin-dependent kinase inhibitor 1A (p21, Cip1)	Multiple_Complex
TC0900012219.hg.1	6.71	4.53	4.54	1.49e-11	7.73e-10	CDKN2A	cyclin-dependent kinase inhibitor 2A	Multiple_Complex
TC0400009458.hg.1	6.27	7.9	-3.09	5.39e-06	8e-05	CDKN2AIP	CDKN2A interacting protein	Multiple_Complex
TC1000009869.hg.1	4.09	5.14	-2.08	5.24e-06	7.81e-05	CDNF	cerebral dopamine neurotrophic factor	Multiple_Complex
TC1600011508.hg.1	6.45	7.93	-2.79	4.51e-06	6.89e-05	CDR2	cerebellar degeneration related protein 2	Multiple_Complex
TC1600010966.hg.1	7.23	6.14	2.13	0.0053	0.0307	CDYL2	chromodomain protein, Y-like 2	Multiple_Complex
TC2200007894.hg.1	7.52	9.18	-3.15	1.62e-05	0.0002	CECR1	cat eye syndrome chromosome region, candidate 1	Multiple_Complex
TC1000006754.hg.1	14.55	13.48	2.09	3.42e-05	0.0004	CELF2	CUGBP, Elav-like family member 2	Multiple_Complex
TC1600008567.hg.1	6.79	5.74	2.07	9.79e-05	0.001	CENPN	centromere protein N	Multiple_Complex
TC0300013719.hg.1	6.54	8.02	-2.77	7.53e-07	1.4e-05	CEP19	centrosomal protein 19kDa	Multiple_Complex
TC0700012602.hg.1	4.82	6	-2.27	3.07e-06	4.88e-05	CEP41	centrosomal protein 41kDa	Multiple_Complex
TC0300008888.hg.1	7.52	8.86	-2.52	0.0009	0.0068	CEP63	centrosomal protein 63kDa	Multiple_Complex
TC0200007825.hg.1	9.91	11.11	-2.3	2.9e-05	0.0003	CEP68	centrosomal protein 68kDa	Multiple_Complex
TC1200010653.hg.1	10.5	9.1	2.63	3.41e-08	8.68e-07	CERS5	ceramide synthase 5	Multiple_Complex
TC0200009895.hg.1	6.58	10.01	-10.71	1.31e-16	1.59e-14	CERS6	ceramide synthase 6	Multiple_Complex
TC0200007636.hg.1	9.04	10.55	-2.85	3.93e-07	7.86e-06	CFAP36	cilia and flagella associated protein 36	Multiple_Complex
TC0100011064.hg.1	5.67	4.57	2.14	0.0032	0.0202	CFH	complement factor H	Multiple_Complex
TC0200010443.hg.1	16.67	13.59	8.47	3.75e-23	1.32e-20	CFLAR	CASP8 and FADD like apoptosis regulator	Multiple_Complex
TC1500010723.hg.1	7.56	4.84	6.57	2.81e-19	5.44e-17	CHAC1	ChaC glutathione-specific gamma-glutamylcyclotransferase 1	Multiple_Complex
TC0800007697.hg.1	10.74	11.94	-2.3	5.32e-05	0.0006	CHCHD7	coiled-coil-helix-coiled-coil-helix domain containing 7	Multiple_Complex
TC1100013111.hg.1	5.86	4.8	2.08	0.0001	0.0014	CHEK1	checkpoint kinase 1	Multiple_Complex
TC2000007169.hg.1	10.1	8.96	2.21	2.53e-07	5.3e-06	CHMP4B	charged multivesicular body protein 4B	Multiple_Complex
TC0800007013.hg.1	7.28	9.67	-5.23	1.52e-16	1.82e-14	CHMP7	charged multivesicular body protein 7	Multiple_Complex
TC1500006994.hg.1	10.82	9.73	2.13	1.37e-07	3.06e-06	CHP1	calcineurin-like EF-hand protein 1	Multiple_Complex
TC0800010297.hg.1	4.17	5.38	-2.31	6.45e-05	0.0007	CHRNA6	cholinergic receptor, nicotinic alpha 6	Multiple_Complex
TC1200008685.hg.1	6.54	5.15	2.61	0.0042	0.0254	CHST11	Transcript Identified by AceView, Entrez Gene ID(s) 50515	Unassigned
TC1200008686.hg.1	7.95	6.3	3.15	7.04e-06	0.0001	CHST11	Transcript Identified by AceView, Entrez Gene ID(s) 50515	Unassigned
TC1200008683.hg.1	11.61	9.41	4.59	4.12e-10	1.63e-08	CHST11	carbohydrate (chondroitin 4) sulfotransferase 11	Multiple_Complex
TC0700013327.hg.1	9.26	7.78	2.78	6.31e-07	1.2e-05	CHST12	carbohydrate (chondroitin 4) sulfotransferase 12	Coding
TC0100009900.hg.1	5.08	6.88	-3.48	2.52e-07	5.26e-06	CIART	circadian associated repressor of transcription	Multiple_Complex
TC1600006888.hg.1	7.75	5.91	3.58	2.77e-06	4.48e-05	CIITA	class II, major histocompatibility complex, transactivator	Multiple_Complex
TC0200014990.hg.1	10.6	11.71	-2.17	0.0041	0.025	CIR1	corepressor interacting with RBPJ, 1	Multiple_Complex
TC1900006524.hg.1	11.04	12.76	-3.29	2.24e-07	4.76e-06	CIRBP	cold inducible RNA binding protein	Multiple_Complex
TC1700007718.hg.1	8.71	6.88	3.55	2.78e-13	1.95e-11	CISD3	CDGSH iron sulfur domain 3	Multiple_Complex
TC0300011124.hg.1	10.62	7.77	7.23	5.9e-06	8.64e-05	CISH	cytokine inducible SH2-containing protein	Multiple_Complex
TC0600013361.hg.1	9.86	11.47	-3.05	3.55e-10	1.42e-08	CITED2	Cbp/p300-interacting transactivator, with Glu/Asp rich carboxy-terminal domain, 2	Coding
TC0900007863.hg.1	7.58	6.39	2.29	0.0001	0.0014	CKS2	CDC28 protein kinase regulatory subunit 2	Multiple_Complex
TC1100013192.hg.1	6.21	4.63	2.99	2.02e-07	4.34e-06	CLCF1	cardiotrophin-like cytokine factor 1	Coding
TC0700013396.hg.1	5.11	3.81	2.46	8.53e-06	0.0001	CLDN12	claudin 12	Multiple_Complex
TC0300014020.hg.1	16.54	15.07	2.79	3.08e-07	6.3e-06	CLDND1	claudin domain containing 1	Multiple_Complex
TC1900012017.hg.1	7.85	6.52	2.52	1.35e-07	3.01e-06	CLDND2	claudin domain containing 2	Coding
TC0600014265.hg.1	14.38	11.91	5.54	8.57e-17	1.08e-14	CLIC1	chloride intracellular channel 1	Coding
TC0100007378.hg.1	8.54	7.24	2.45	8.68e-05	0.0009	CLIC4	chloride intracellular channel 4	Multiple_Complex
TC0600011938.hg.1	6.23	7.57	-2.53	0.0008	0.0062	CLIC5	chloride intracellular channel 5	Multiple_Complex
TC1200012234.hg.1	8.03	6.81	2.32	4.17e-07	8.29e-06	CLIP1	CAP-GLY domain containing linker protein 1	Multiple_Complex
TC0200015397.hg.1	14.24	15.49	-2.38	0.0002	0.0021	CLK1	CDC like kinase 1	Multiple_Complex
TC0500013020.hg.1	9.53	11.19	-3.17	9.22e-05	0.001	CLK4	CDC like kinase 4	Multiple_Complex
TC1300007549.hg.1	8.09	9.65	-2.94	1.91e-07	4.13e-06	CLN5	ceroid-lipofuscinosis, neuronal 5	Multiple_Complex
TC1700008465.hg.1	11.13	9.99	2.21	0.0002	0.0018	CLTC	clathrin, heavy chain (Hc)	Multiple_Complex
TC1600011343.hg.1	5.17	6.99	-3.54	4.54e-09	1.41e-07	CLUAP1	clusterin associated protein 1	Multiple_Complex
TC1700009451.hg.1	7.83	6.63	2.3	4.42e-06	6.78e-05	CLUH	clustered mitochondria (cluA/CLU1) homolog	Multiple_Complex
TC0300006894.hg.1	13.88	9.9	15.82	3.24e-17	4.45e-15	CMC1	C-x(9)-C motif containing 1	Multiple_Complex
TC0X00006758.hg.1	6.52	9.11	-6.04	5.23e-16	5.72e-14	CNKSR2	connector enhancer of kinase suppressor of Ras 2	Multiple_Complex
TC1900006507.hg.1	5.53	6.69	-2.25	1.39e-05	0.0002	CNN2	calponin 2	Multiple_Complex
TC0100014995.hg.1	4.64	8.05	-10.65	7.49e-17	9.59e-15	CNN3	calponin 3, acidic	Multiple_Complex
TC1200008162.hg.1	10.52	11.6	-2.11	0.0029	0.0188	CNOT2	CCR4-NOT transcription complex subunit 2	Multiple_Complex
TC0500009181.hg.1	9.98	11.03	-2.07	7.95e-05	0.0008	CNOT8	CCR4-NOT transcription complex subunit 8	Multiple_Complex
TC0600008059.hg.1	11.06	12.1	-2.05	2.07e-07	4.43e-06	CNPY3	canopy FGF signaling regulator 3	Multiple_Complex
TC0700008524.hg.1	7.32	9.66	-5.06	9.59e-13	6.25e-11	CNPY4	canopy FGF signaling regulator 4	Multiple_Complex
TC0200007739.hg.1	8.96	7.9	2.08	0.0004	0.0037	COMMD1	copper metabolism (Murr1) domain containing 1	Multiple_Complex
TC1700010327.hg.1	7.53	5.77	3.38	3.1e-09	1e-07	COPRS	coordinator of PRMT5, differentiation stimulator	Multiple_Complex
TC1400007663.hg.1	6.01	7.27	-2.38	2.5e-05	0.0003	COQ6	coenzyme Q6 monooxygenase	Multiple_Complex
TC1200011846.hg.1	7.9	6.55	2.57	0.0001	0.0012	CORO1C	coronin, actin binding protein, 1C	Multiple_Complex
TC0900010969.hg.1	6.94	7.97	-2.05	6.88e-05	0.0007	CORO2A	coronin, actin binding protein, 2A	Multiple_Complex
TC1000011592.hg.1	8.51	9.6	-2.13	2.49e-08	6.59e-07	COX15	cytochrome c oxidase assembly homolog 15 (yeast)	Multiple_Complex
TC0M00006437.hg.1	12.06	13.29	-2.35	6.08e-06	8.87e-05	COX2	cytochrome c oxidase subunit II	Multiple_Complex
TC1600008709.hg.1	11.23	12.53	-2.47	5.6e-06	8.27e-05	COX4I1	cytochrome c oxidase subunit IV isoform 1	Multiple_Complex
TC1700007451.hg.1	6.17	5.12	2.07	2.14e-05	0.0003	CPD	carboxypeptidase D	Multiple_Complex
TC1200010397.hg.1	7.89	6.38	2.86	2.55e-06	4.15e-05	CPNE8	copine VIII	Multiple_Complex
TC1600009446.hg.1	7.93	6.53	2.64	3.4e-05	0.0004	CPPED1	calcineurin-like phosphoesterase domain containing 1	Multiple_Complex
TC0300010123.hg.1	9.8	10.99	-2.28	8.63e-07	1.58e-05	CRBN	cereblon	Multiple_Complex
TC0900007096.hg.1	10.38	9.23	2.22	6.68e-08	1.59e-06	CREB3	cAMP responsive element binding protein 3	Multiple_Complex
TC0700012734.hg.1	8.92	6.93	3.98	7.42e-12	4.11e-10	CREB3L2	cAMP responsive element binding protein 3-like 2	Multiple_Complex
TC0500009488.hg.1	8.29	10.05	-3.4	8.05e-05	0.0009	CREBRF	CREB3 regulatory factor	Multiple_Complex
TC2200007780.hg.1	7.55	6.37	2.26	1.09e-05	0.0001	CRELD2	cysteine rich with EGF-like domains 2	Multiple_Complex
TC1000007272.hg.1	13.33	11.61	3.3	5.92e-08	1.43e-06	CREM	cAMP responsive element modulator	Multiple_Complex
TC0200007237.hg.1	8.36	5.35	8.05	1.54e-19	3.17e-17	CRIM1	cysteine rich transmembrane BMP regulator 1 (chordin-like)	Multiple_Complex
TC1700010293.hg.1	9.49	10.78	-2.45	3.64e-08	9.22e-07	CRLF3	cytokine receptor-like factor 3	Multiple_Complex
TC1100009334.hg.1	12.69	8.91	13.75	5.73e-17	7.59e-15	CRTAM	cytotoxic and regulatory T-cell molecule	Multiple_Complex
TC0100015891.hg.1	10.1	11.15	-2.06	4.89e-06	7.39e-05	CRTC2	CREB regulated transcription coactivator 2	Multiple_Complex
TC1500008317.hg.1	10.02	11.19	-2.24	1.37e-11	7.16e-10	CRTC3	CREB regulated transcription coactivator 3	Multiple_Complex
TC0100009364.hg.1	12.03	8.24	13.83	1.58e-12	9.67e-11	CSF1	colony stimulating factor 1 (macrophage)	Multiple_Complex
TC0500008620.hg.1	7.46	4.81	6.28	2.14e-18	3.64e-16	CSF2	colony stimulating factor 2 (granulocyte-macrophage)	Coding
TC1900006565.hg.1	8.67	9.76	-2.13	0.0007	0.0058	CSNK1G2	casein kinase 1, gamma 2	Multiple_Complex
TC2000007005.hg.1	13.73	6.87	115.88	6.44e-32	9.2e-29	CST7	cystatin F (leukocystatin)	Coding
TC1200010984.hg.1	8.62	9.97	-2.55	1.37e-05	0.0002	CTDSP2	CTD small phosphatase 2	Multiple_Complex
TC0200010525.hg.1	6.91	5.28	3.11	7.47e-05	0.0008	CTLA4	cytotoxic T-lymphocyte-associated protein 4	Multiple_Complex
TC0500008794.hg.1	5.57	3.57	4.03	7.36e-09	2.17e-07	CTNNA1	catenin (cadherin-associated protein), alpha 1	Multiple_Complex
TC0X00009153.hg.1	7.79	9.31	-2.86	9.99e-05	0.001	CTPS2	CTP synthase 2	Multiple_Complex
TC1100011888.hg.1	9.48	7.63	3.61	5.82e-13	3.92e-11	CTSC	cathepsin C	Multiple_Complex
TC0100009441.hg.1	6.53	4.94	3.01	8.47e-08	1.97e-06	CTTNBP2NL	CTTNBP2 N-terminal like	Multiple_Complex
TC1000009916.hg.1	5.81	7.85	-4.11	1.34e-07	2.99e-06	CUBN	cubilin (intrinsic factor-cobalamin receptor)	Multiple_Complex
TC0X00010675.hg.1	6.24	7.25	-2.02	1.94e-05	0.0002	CUL4B	cullin 4B	Multiple_Complex
TC0600011546.hg.1	14.03	15.35	-2.49	1.82e-10	7.73e-09	CUTA	cutA divalent cation tolerance homolog (E. coli)	Multiple_Complex
TC1000012492.hg.1	7.89	8.96	-2.09	3.31e-05	0.0004	CUTC	cutC copper transporter	Multiple_Complex
TC0300010775.hg.1	7.21	3.66	11.77	9.65e-09	2.79e-07	CX3CR1	chemokine (C-X3-C motif) receptor 1	Coding
TC1700009528.hg.1	7.3	8.57	-2.41	0.0003	0.0024	CXCL16	chemokine (C-X-C motif) ligand 16	Multiple_Complex
TC0X00010005.hg.1	9.75	8.58	2.25	2.4e-06	3.93e-05	CXCR3	chemokine (C-X-C motif) receptor 3	Coding
TC0300007251.hg.1	8.61	5.99	6.17	1.13e-14	1.04e-12	CXCR6	chemokine (C-X-C motif) receptor 6	Multiple_Complex
TC0X00009328.hg.1	5.6	6.97	-2.58	2.54e-05	0.0003	CXorf21	chromosome X open reading frame 21	Coding
TC0700010509.hg.1	12.92	11.54	2.6	1.64e-10	7e-09	CYCS	cytochrome c, somatic	Coding
TC0500009211.hg.1	8.84	9.97	-2.2	0.0003	0.0024	CYFIP2	cytoplasmic FMR1 interacting protein 2	Multiple_Complex
TC1700012476.hg.1	4.64	5.83	-2.28	4.47e-08	1.11e-06	CYGB	cytoglobin	Multiple_Complex
TC1700012477.hg.1	5.78	7.41	-3.09	3.42e-06	5.37e-05	CYGB; RP11-666A8.8	Transcript Identified by AceView, Entrez Gene ID(s) 114757; novel transcript, antisense to PRCD	Multiple_Complex
TC0100014365.hg.1	3.75	5.61	-3.64	5.33e-11	2.54e-09	CYP2J2	cytochrome P450, family 2, subfamily J, polypeptide 2	Multiple_Complex
TC1100010185.hg.1	8.16	9.89	-3.32	6.27e-05	0.0007	CYP2R1	cytochrome P450, family 2, subfamily R, polypeptide 1	Multiple_Complex
TC0700013584.hg.1	10.42	8.18	4.74	8.93e-14	6.87e-12	CYP51A1	cytochrome P450, family 51, subfamily A, polypeptide 1	Multiple_Complex
TC0500008849.hg.1	8.03	6.48	2.94	8.42e-12	4.61e-10	CYSTM1	cysteine-rich transmembrane module containing 1	Multiple_Complex
TC1700011910.hg.1	10.6	11.65	-2.07	0.0001	0.0013	CYTH1	cytohesin 1	Multiple_Complex
TC0700010189.hg.1	9.24	6.14	8.6	1.2e-09	4.3e-08	CYTH3	cytohesin 3	Multiple_Complex
TC2200007287.hg.1	7.66	8.97	-2.47	5.56e-06	8.23e-05	CYTH4	cytohesin 4	Multiple_Complex
TC1400007328.hg.1	7.76	6.58	2.26	5.31e-05	0.0006	DAAM1	dishevelled associated activator of morphogenesis 1	Multiple_Complex
TC0700013509.hg.1	7.68	8.78	-2.15	3.11e-05	0.0004	DAGLB	diacylglycerol lipase, beta	Multiple_Complex
TC0400008240.hg.1	4.12	5.52	-2.64	5.81e-05	0.0006	DAPP1	dual adaptor of phosphotyrosine and 3-phosphoinositides	Multiple_Complex
TC0200009065.hg.1	13.24	12.2	2.05	3.4e-05	0.0004	DBI	diazepam binding inhibitor (GABA receptor modulator, acyl-CoA binding protein)	Multiple_Complex
TC1900011084.hg.1	6.46	8.52	-4.19	4.12e-13	2.83e-11	DBP	D site of albumin promoter (albumin D-box) binding protein	Multiple_Complex
TC1700010859.hg.1	8.36	9.68	-2.49	1.43e-05	0.0002	DCAKD	dephospho-CoA kinase domain containing	Multiple_Complex
TC0300011815.hg.1	4.5	5.6	-2.15	0.0002	0.0019	DCBLD2	discoidin, CUB and LCCL domain containing 2	Multiple_Complex
TC1100009982.hg.1	3.67	4.77	-2.14	6.06e-07	1.16e-05	DCHS1	dachsous cadherin-related 1	Multiple_Complex
TC0400012811.hg.1	6.27	7.36	-2.13	1.61e-09	5.65e-08	DCK	deoxycytidine kinase	Multiple_Complex
TC1600009966.hg.1	9.48	8.03	2.74	7.99e-09	2.35e-07	DCTPP1	dCTP pyrophosphatase 1	Multiple_Complex
TC1000007876.hg.1	9.11	7.84	2.4	0.0005	0.0039	DDX21	DEAD (Asp-Glu-Ala-Asp) box helicase 21	Multiple_Complex
TC0100016839.hg.1	7.64	6.37	2.41	0.0005	0.0045	DENND1B	DENN/MADD domain containing 1B	Multiple_Complex
TC0100015265.hg.1	8.58	10.18	-3.03	5.76e-08	1.39e-06	DENND2D	DENN/MADD domain containing 2D	Multiple_Complex
TC0800009094.hg.1	8.88	6.59	4.9	4.63e-08	1.14e-06	DENND3	DENN/MADD domain containing 3	Multiple_Complex
TC0900006758.hg.1	8.15	9.19	-2.06	0.0029	0.0188	DENND4C	DENN/MADD domain containing 4C	Multiple_Complex
TC1100010058.hg.1	6.89	8.12	-2.34	2.36e-05	0.0003	DENND5A	DENN/MADD domain containing 5A	Multiple_Complex
TC1100007220.hg.1	5.11	6.6	-2.81	4.64e-07	9.11e-06	DEPDC7	DEP domain containing 7	Multiple_Complex
TC2200008832.hg.1	11.56	10.19	2.59	3.88e-11	1.89e-09	DESI1	desumoylating isopeptidase 1	Multiple_Complex
TC0900011286.hg.1	8.41	6.63	3.45	1.21e-06	2.13e-05	DFNB31	deafness, autosomal recessive 31	Multiple_Complex
TC1200007816.hg.1	5.21	6.24	-2.05	4.2e-06	6.44e-05	DGKA	diacylglycerol kinase alpha	Multiple_Complex
TC0100014276.hg.1	9.16	6.91	4.76	3.17e-09	1.02e-07	DHCR24	24-dehydrocholesterol reductase	Multiple_Complex
TC1100011514.hg.1	10.19	9.1	2.12	8.15e-05	0.0009	DHCR7	7-dehydrocholesterol reductase	Multiple_Complex
TC1300008997.hg.1	7.7	9.45	-3.37	6.23e-06	9.07e-05	DHRS12	dehydrogenase/reductase (SDR family) member 12	Multiple_Complex
TC1700010221.hg.1	7.52	8.96	-2.72	6.82e-10	2.55e-08	DHRS13	dehydrogenase/reductase (SDR family) member 13	Multiple_Complex
TC0100012921.hg.1	8.29	10.34	-4.15	6.58e-11	3.07e-09	DHRS3; MIR6730	dehydrogenase/reductase (SDR family) member 3; microRNA 6730	Multiple_Complex
TC1000012164.hg.1	6.18	7.42	-2.36	4.05e-06	6.24e-05	DHX32	DEAH (Asp-Glu-Ala-His) box polypeptide 32	Multiple_Complex
TC1700012342.hg.1	6.89	5.5	2.63	2.2e-06	3.64e-05	DHX33	DEAH (Asp-Glu-Ala-His) box polypeptide 33	Multiple_Complex
TC1700010707.hg.1	5.9	7.25	-2.55	7.17e-06	0.0001	DHX58	DEXH (Asp-Glu-X-His) box polypeptide 58	Multiple_Complex
TC0X00007889.hg.1	9.2	8.1	2.14	1.83e-05	0.0002	DIAPH2	diaphanous-related formin 2	Multiple_Complex
TC0300008563.hg.1	6.07	7.41	-2.52	1.43e-05	0.0002	DIRC2	disrupted in renal carcinoma 2	Multiple_Complex
TC1300008938.hg.1	9.07	6.72	5.09	1.47e-12	9.07e-11	DLEU2; MIR15A; MIR16-1; MIR3613	deleted in lymphocytic leukemia 2 (non-protein coding); microRNA 15a; microRNA 16-1; microRNA 3613	Multiple_Complex
TC1700009619.hg.1	4.09	7.66	-11.94	2.23e-17	3.15e-15	DLG4	discs, large homolog 4 (Drosophila)	Multiple_Complex
TC0600014031.hg.1	5.34	7	-3.17	6.94e-10	2.59e-08	DLL1	delta-like 1 (Drosophila)	Multiple_Complex
TC0300013911.hg.1	12.11	9.58	5.78	2.21e-14	1.94e-12	DNAJB11	DnaJ (Hsp40) homolog, subfamily B, member 11	Multiple_Complex
TC0700008786.hg.1	11.62	10.39	2.34	9.19e-07	1.67e-05	DNAJB9	DnaJ (Hsp40) homolog, subfamily B, member 9	Multiple_Complex
TC1300007755.hg.1	7.82	6.4	2.68	6.61e-07	1.25e-05	DNAJC3	DnaJ (Hsp40) homolog, subfamily C, member 3	Multiple_Complex
TC1100013032.hg.1	10.66	12.02	-2.56	1.47e-08	4.13e-07	DNAJC4	DnaJ (Hsp40) homolog, subfamily C, member 4	Multiple_Complex
TC0100010609.hg.1	5.42	6.72	-2.48	3.15e-05	0.0004	DNM3	dynamin 3	Multiple_Complex
TC0200015893.hg.1	10.23	11.44	-2.32	0.0062	0.035	DOCK10	dedicator of cytokinesis 10	Multiple_Complex
TC1300009583.hg.1	9.84	11.3	-2.74	2.31e-06	3.8e-05	DOCK9	dedicator of cytokinesis 9	Multiple_Complex
TC0800009819.hg.1	12.18	7.22	31.12	1.71e-29	1.67e-26	DOK2	docking protein 2	Multiple_Complex
TC0300010424.hg.1	10.14	8.8	2.53	2.17e-09	7.36e-08	DPH3	diphthamide biosynthesis 3	Multiple_Complex
TC0100015082.hg.1	8.88	10.09	-2.31	2.59e-13	1.83e-11	DPH5	diphthamide biosynthesis 5	Multiple_Complex
TC0100015258.hg.1	8.43	9.91	-2.79	6.7e-06	9.67e-05	DRAM2	DNA-damage regulated autophagy modulator 2	Multiple_Complex
TC2000009016.hg.1	6.04	7.1	-2.07	6.07e-05	0.0007	DSN1	DSN1 homolog, MIS12 kinetochore complex component	Multiple_Complex
TC0300008289.hg.1	5.12	6.54	-2.67	1.02e-06	1.83e-05	DZIP3	DAZ interacting zinc finger protein 3	Multiple_Complex
TC0400007225.hg.1	9.5	4.88	24.49	1.5e-22	4.83e-20	DTHD1	death domain containing 1	Multiple_Complex
TC0600010901.hg.1	9.67	11.06	-2.63	3.18e-08	8.21e-07	DTNBP1	dystrobrevin binding protein 1	Multiple_Complex
TC0100017420.hg.1	10.54	8.34	4.58	2.73e-13	1.92e-11	DUSP10	dual specificity phosphatase 10	Multiple_Complex
TC2200008449.hg.1	7.43	6.19	2.36	3.87e-06	6e-05	DUSP18	dual specificity phosphatase 18	Multiple_Complex
TC0200013511.hg.1	11.69	8.88	7	5.12e-12	2.9e-10	DUSP2	dual specificity phosphatase 2	Multiple_Complex
TC0800010002.hg.1	12.87	6.74	69.94	1.94e-25	9.88e-23	DUSP4	dual specificity phosphatase 4	Multiple_Complex
TC1000008891.hg.1	11.42	6.54	29.52	4.35e-27	2.74e-24	DUSP5	dual specificity phosphatase 5	Multiple_Complex
TC1200011470.hg.1	10.12	7.96	4.47	1.15e-07	2.59e-06	DUSP6	dual specificity phosphatase 6	Multiple_Complex
TC0300011152.hg.1	5.08	6.24	-2.23	2.23e-05	0.0003	DUSP7	dual specificity phosphatase 7	Multiple_Complex
TC1500007163.hg.1	9.25	10.3	-2.07	1.11e-05	0.0002	DUT	deoxyuridine triphosphatase	Multiple_Complex
TC0600011471.hg.1	6.97	8.13	-2.23	8.4e-07	1.54e-05	DXO	decapping exoribonuclease	Multiple_Complex
TC1200008081.hg.1	6.42	7.71	-2.46	0.0002	0.0022	DYRK2	dual specificity tyrosine-(Y)-phosphorylation regulated kinase 2	Multiple_Complex
TC0100011382.hg.1	8.23	6.8	2.68	1.89e-07	4.11e-06	DYRK3	dual specificity tyrosine-(Y)-phosphorylation regulated kinase 3	Multiple_Complex
TC1400008908.hg.1	10.55	11.86	-2.47	1.36e-06	2.35e-05	EAPP	E2F-associated phosphoprotein	Multiple_Complex
TC0100018435.hg.1	8.95	7.15	3.48	3.63e-07	7.33e-06	EBNA1BP2; MIR6733	EBNA1 binding protein 2; microRNA 6733	Multiple_Complex
TC0X00007191.hg.1	12.45	11.17	2.43	1.19e-06	2.09e-05	EBP	emopamil binding protein (sterol isomerase)	Multiple_Complex
TC0100012093.hg.1	6.33	5.08	2.37	1.88e-06	3.17e-05	EDARADD	EDAR-associated death domain	Multiple_Complex
TC0200010567.hg.1	12.28	14.08	-3.5	4.85e-08	1.19e-06	EEF1B2; SNORA41	eukaryotic translation elongation factor 1 beta 2; small nucleolar RNA, H/ACA box 41	Multiple_Complex
TC0800012144.hg.1	10.04	11.33	-2.44	9.43e-08	2.18e-06	EEF1D	eukaryotic translation elongation factor 1 delta (guanine nucleotide exchange protein)	Multiple_Complex
TC0100008588.hg.1	5.01	6.05	-2.06	0.001	0.0076	EFCAB7; DLEU2L	EF-hand calcium binding domain 7; deleted in lymphocytic leukemia 2-like	Multiple_Complex
TC0100006982.hg.1	10.77	7.48	9.84	1.99e-20	4.35e-18	EFHD2	EF-hand domain family member D2	Coding
TC0100010111.hg.1	4.51	5.64	-2.2	0.0001	0.0011	EFNA1	ephrin-A1	Multiple_Complex
TC0500011648.hg.1	5.01	3.82	2.29	0.0003	0.003	EFNA5	ephrin-A5	Multiple_Complex
TC1400010731.hg.1	4.38	7.49	-8.65	4.86e-11	2.32e-09	EGLN3	egl-9 family hypoxia-inducible factor 3	NonCoding
TC1000010768.hg.1	13.94	6.42	184.07	3.88e-25	1.94e-22	EGR2	early growth response 2	Multiple_Complex
TC1500007174.hg.1	10.39	9.32	2.1	1.77e-05	0.0002	EID1	EP300 interacting inhibitor of differentiation 1	Multiple_Complex
TC0200013376.hg.1	10.2	8.98	2.32	0.0004	0.0033	EIF2AK3	eukaryotic translation initiation factor 2-alpha kinase 3	Multiple_Complex
TC0100017100.hg.1	9.19	10.87	-3.19	7.62e-14	6.01e-12	EIF2D	eukaryotic translation initiation factor 2D	Multiple_Complex
TC0X00006803.hg.1	8.68	9.82	-2.21	0.0075	0.0406	EIF2S3	eukaryotic translation initiation factor 2, subunit 3 gamma, 52kDa	Multiple_Complex
TC0800012451.hg.1	12.7	14.18	-2.79	2.21e-08	5.94e-07	EIF3E	eukaryotic translation initiation factor 3, subunit E	Multiple_Complex
TSUnmapped00000397.hg.1	11.58	12.71	-2.18	3.67e-09	1.17e-07	EIF3F	Eukaryotic translation initiation factor 3 subunit F [Source:UniProtKB/Swiss-Prot;Acc:O00303]	Coding
TC1900009608.hg.1	10.73	11.78	-2.07	0.0011	0.008	EIF3G	eukaryotic translation initiation factor 3, subunit G	Multiple_Complex
TC0800011561.hg.1	13.43	14.48	-2.06	5.66e-07	1.09e-05	EIF3H	eukaryotic translation initiation factor 3, subunit H	Multiple_Complex
TC1200007687.hg.1	12.01	13.75	-3.34	2.84e-06	4.56e-05	EIF4B	eukaryotic translation initiation factor 4B	Multiple_Complex
TC0800007316.hg.1	8.43	6.66	3.4	3.42e-07	6.96e-06	EIF4EBP1	eukaryotic translation initiation factor 4E binding protein 1	Multiple_Complex
TC2200008482.hg.1	10.54	8.74	3.48	8.87e-14	6.84e-12	EIF4ENIF1	eukaryotic translation initiation factor 4E nuclear import factor 1	Multiple_Complex
TC0100013194.hg.1	9.29	7.91	2.61	2.44e-08	6.47e-07	EIF4G3	eukaryotic translation initiation factor 4 gamma, 3	Multiple_Complex
TC2000009268.hg.1	12.92	11.43	2.79	3e-09	9.81e-08	ELMO2	engulfment and cell motility 2	Multiple_Complex
TC0400012956.hg.1	7.53	4.87	6.31	1.49e-12	9.16e-11	ELOVL6	ELOVL fatty acid elongase 6	Multiple_Complex
TC1900008337.hg.1	8.61	7	3.06	1.09e-06	1.93e-05	EML2-AS1	EML2 antisense RNA 1	Multiple_Complex
TC0500011146.hg.1	5.51	4.41	2.15	7.84e-05	0.0008	ENC1	ectodermal-neural cortex 1 (with BTB domain)	Multiple_Complex
TC1800007863.hg.1	9.65	8.23	2.69	0.0003	0.0023	ENOSF1	enolase superfamily member 1	Multiple_Complex
TC1000012482.hg.1	7.65	5.08	5.92	0.0002	0.0021	ENTPD1	ectonucleoside triphosphate diphosphohydrolase 1	Multiple_Complex
TC0300011448.hg.1	6.88	5.72	2.24	0.0003	0.0027	EOGT	EGF domain-specific O-linked N-acetylglucosamine (GlcNAc) transferase	Multiple_Complex
TC0300010566.hg.1	11.39	7.02	20.66	1.34e-20	3.02e-18	EOMES	eomesodermin	Coding
TC0200007458.hg.1	6.64	5.21	2.69	4.25e-08	1.06e-06	EPAS1	endothelial PAS domain protein 1	Multiple_Complex
TC0100007574.hg.1	13.21	14.47	-2.4	8.02e-12	4.42e-10	EPB41	erythrocyte membrane protein band 4.1	Multiple_Complex
TC0700012886.hg.1	4.17	6.22	-4.14	5.43e-08	1.32e-06	EPHA1	EPH receptor A1	Multiple_Complex
TC0700009472.hg.1	8.57	10.02	-2.72	8.65e-10	3.19e-08	EPHB6	EPH receptor B6	Multiple_Complex
TC0100011770.hg.1	5.43	6.6	-2.25	0.0016	0.0115	EPHX1	epoxide hydrolase 1, microsomal (xenobiotic)	Multiple_Complex
TC0800007110.hg.1	4.06	7.32	-9.57	8.1e-18	1.24e-15	EPHX2	epoxide hydrolase 2, cytoplasmic	Multiple_Complex
TC1700012207.hg.1	6.58	4.84	3.35	8.53e-08	1.98e-06	EPN2; EPN2-IT1	epsin 2; EPN2 intronic transcript 1	Multiple_Complex
TC0100014175.hg.1	9.1	7.06	4.09	5.4e-11	2.57e-09	EPS15	epidermal growth factor receptor pathway substrate 15	Multiple_Complex
TC0800009331.hg.1	12.31	14.38	-4.19	5.4e-09	1.64e-07	ERICH1	glutamate rich 1	Multiple_Complex
TC1700011436.hg.1	10.62	7.66	7.79	1.2e-20	2.73e-18	ERN1	endoplasmic reticulum to nucleus signaling 1	Multiple_Complex
TC1200010023.hg.1	7.95	9.34	-2.61	0.0013	0.0095	ERP27	endoplasmic reticulum protein 27	Multiple_Complex
TC0900011013.hg.1	11.4	10.37	2.05	2.54e-08	6.73e-07	ERP44	endoplasmic reticulum protein 44	Multiple_Complex
TC0100018403.hg.1	6.83	4.36	5.51	2.33e-13	1.66e-11	ERRFI1	ERBB receptor feedback inhibitor 1	Multiple_Complex
TC1300008855.hg.1	10.21	11.42	-2.31	8.96e-07	1.63e-05	ESD	esterase D	Multiple_Complex
TC0700012959.hg.1	9.57	8.27	2.46	5.64e-06	8.31e-05	EZH2	enhancer of zeste 2 polycomb repressive complex 2 subunit	Multiple_Complex
TC1100012775.hg.1	12.72	13.91	-2.28	0.0016	0.0113	ETS1	v-ets avian erythroblastosis virus E26 oncogene homolog 1	Multiple_Complex
TC2100007140.hg.1	8.2	6.85	2.55	3.05e-07	6.25e-06	ETS2	v-ets avian erythroblastosis virus E26 oncogene homolog 2	Multiple_Complex
TC1200006850.hg.1	13.09	11.67	2.69	1.27e-06	2.21e-05	ETV6	ets variant 6	Multiple_Complex
TC1400008193.hg.1	12.33	14.5	-4.5	1.42e-18	2.46e-16	EVL	Enah/Vasp-like	Multiple_Complex
TC1100012230.hg.1	5.07	6.45	-2.62	4.13e-05	0.0005	EXPH5	exophilin 5	Multiple_Complex
TC0100013458.hg.1	6.29	5.21	2.12	1.71e-05	0.0002	EYA3	EYA transcriptional coactivator and phosphatase 3	Multiple_Complex
TC0500007831.hg.1	7.73	6.62	2.16	1.92e-06	3.23e-05	F2R	coagulation factor II (thrombin) receptor	Multiple_Complex
TC0500011194.hg.1	6.92	5.29	3.1	0.0009	0.0066	F2RL2	coagulation factor II (thrombin) receptor-like 2	Coding
TC0100016356.hg.1	7.81	5.33	5.58	1.78e-08	4.92e-07	F5	coagulation factor V (proaccelerin, labile factor)	Multiple_Complex
TC0X00007416.hg.1	6.69	9.08	-5.23	4.32e-09	1.35e-07	FAAH2	fatty acid amide hydrolase 2	Multiple_Complex
TC0800008080.hg.1	12.82	9.74	8.45	4.53e-15	4.43e-13	FABP5	fatty acid binding protein 5 (psoriasis-associated)	Multiple_Complex
TC1100010987.hg.1	12.91	9.73	9.03	2.4e-19	4.68e-17	FABP5	fatty acid binding protein 5 (psoriasis-associated)	Multiple_Complex
TC1100011050.hg.1	6.01	4.97	2.06	0.0017	0.0119	FADS1; MIR1908	fatty acid desaturase 1; microRNA 1908	Multiple_Complex
TC1100013022.hg.1	6.36	4.85	2.84	0.0002	0.0015	FADS2	fatty acid desaturase 2	Multiple_Complex
TC1500008029.hg.1	5.78	4.75	2.04	0.0025	0.0165	FAH	fumarylacetoacetate hydrolase (fumarylacetoacetase)	Multiple_Complex
TC0900011613.hg.1	11.6	13.77	-4.49	8.88e-12	4.82e-10	FAM102A	family with sequence similarity 102, member A	Multiple_Complex
TC0900008836.hg.1	8.68	10.55	-3.67	3.15e-10	1.28e-08	FAM102A	Memczak2013 ANTISENSE, CDS, coding, INTERNAL, intronic, UTR3 best transcript NM_203305	NonCoding
TC0100009324.hg.1	9.07	7.62	2.73	0.0007	0.0056	FAM102B	family with sequence similarity 102, member B	Multiple_Complex
TC1000009865.hg.1	7.99	6.69	2.47	0.0015	0.0109	FAM107B	Memczak2013 ALT_ACCEPTOR, ALT_DONOR, coding, INTERNAL, intronic best transcript NM_031453	NonCoding
TC0200010502.hg.1	8.82	12.85	-16.25	2.08e-22	6.3e-20	FAM117B	family with sequence similarity 117, member B	Multiple_Complex
TC2200007614.hg.1	8.89	10.18	-2.45	0.0005	0.0038	FAM118A	family with sequence similarity 118, member A	Multiple_Complex
TC0100016678.hg.1	12.25	6.5	53.74	4.18e-29	3.9e-26	FAM129A	family with sequence similarity 129, member A	Multiple_Complex
TC0500010199.hg.1	4.87	7.08	-4.62	2.43e-11	1.23e-09	FAM134B	family with sequence similarity 134, member B	Multiple_Complex
TC0500013417.hg.1	6.38	10.36	-15.83	2.94e-08	7.66e-07	FAM153A	family with sequence similarity 153, member A	NonCoding
TC0500013418.hg.1	4.63	7.65	-8.13	4.37e-11	2.11e-09	FAM153A	family with sequence similarity 153, member A	Multiple_Complex
TC0500013269.hg.1	4.54	7.84	-9.83	1.78e-10	7.54e-09	FAM153B	family with sequence similarity 153, member B	NonCoding
TC0500013268.hg.1	4.76	7.49	-6.64	3.46e-08	8.79e-07	FAM153B	family with sequence similarity 153, member B	Multiple_Complex
TC0500013273.hg.1	5.12	8.11	-7.95	3.58e-08	9.08e-07	FAM153C	family with sequence similarity 153, member C, pseudogene	Multiple_Complex
TC0100008326.hg.1	8.25	10.37	-4.34	2.73e-17	3.81e-15	FAM159A	family with sequence similarity 159, member A	Multiple_Complex
TC0400009001.hg.1	3.21	5.22	-4.03	8.68e-08	2.01e-06	FAM160A1	family with sequence similarity 160, member A1	Multiple_Complex
TC0300008551.hg.1	11.12	12.19	-2.09	8.45e-06	0.0001	FAM162A	family with sequence similarity 162, member A	Multiple_Complex
TC0400011208.hg.1	7.85	8.98	-2.18	5.71e-06	8.4e-05	FAM175A	family with sequence similarity 175, member A	Multiple_Complex
TC1600011322.hg.1	8.52	10.11	-3	1.52e-07	3.34e-06	FAM195A	family with sequence similarity 195, member A	Multiple_Complex
TC1700012070.hg.1	11.42	10.24	2.26	2.54e-07	5.3e-06	FAM195B	family with sequence similarity 195, member B	Multiple_Complex
TC0700011948.hg.1	6.83	7.96	-2.19	2.42e-07	5.09e-06	FAM200A	family with sequence similarity 200, member A	Coding
TC0400012768.hg.1	9.83	11.03	-2.3	2.61e-08	6.88e-07	FAM200B	family with sequence similarity 200, member B	Multiple_Complex
TC1000008234.hg.1	6.92	8.44	-2.87	3.1e-09	1e-07	FAM213A	family with sequence similarity 213, member A	Multiple_Complex
TC1500009460.hg.1	5.58	6.96	-2.62	0.0007	0.0053	FAM214A	family with sequence similarity 214, member A	Multiple_Complex
TC1200008843.hg.1	7.12	9.6	-5.59	7.63e-16	8.22e-14	FAM216A	family with sequence similarity 216, member A	Multiple_Complex
TC0600009169.hg.1	5.66	7.15	-2.8	4.73e-06	7.17e-05	FAM229B	family with sequence similarity 229, member B	Coding
TC1000012600.hg.1	6.91	8.2	-2.44	3.04e-05	0.0004	FAM24B	family with sequence similarity 24, member B	Multiple_Complex
TC0700012427.hg.1	10.47	9.14	2.52	2.67e-09	8.84e-08	FAM3C	family with sequence similarity 3, member C	Multiple_Complex
TC0X00006789.hg.1	10.86	9.41	2.72	4.99e-10	1.95e-08	FAM3C2	FAM3C pseudogene	Multiple_Complex
TC0600014318.hg.1	5.75	6.91	-2.24	0.0001	0.0013	FAM46A	family with sequence similarity 46, member A	Coding
TC0100009572.hg.1	8.14	6.18	3.88	1.35e-11	7.11e-10	FAM46C	family with sequence similarity 46, member C	Coding
TC0200011837.hg.1	8.97	6.58	5.23	1.36e-11	7.11e-10	FAM49A	family with sequence similarity 49, member A	Multiple_Complex
TC1000012130.hg.1	8.53	6.43	4.26	3.71e-09	1.18e-07	FAM53B	Memczak2013 ALT_ACCEPTOR, ALT_DONOR, coding, INTERNAL, intronic best transcript NM_014661	NonCoding
TC1000012603.hg.1	8.45	6	5.47	1.19e-09	4.28e-08	FAM53B	family with sequence similarity 53, member B	Multiple_Complex
TC0600014247.hg.1	11.92	13.89	-3.92	3.72e-10	1.48e-08	FAM65B	family with sequence similarity 65, member B	Multiple_Complex
TC0900011769.hg.1	5.97	7.3	-2.51	3.78e-07	7.6e-06	FAM78A	family with sequence similarity 78, member A	Multiple_Complex
TC0200012219.hg.1	8.82	7.62	2.3	1.05e-05	0.0001	FAM98A	family with sequence similarity 98, member A	Multiple_Complex
TC1500006748.hg.1	5.94	7.02	-2.12	0.0008	0.0065	FAN1	FANCD2/FANCI-associated nuclease 1	Multiple_Complex
TC0200012684.hg.1	6.32	5.26	2.09	0.001	0.0072	FANCL	Fanconi anemia complementation group L	Multiple_Complex
TC1100006906.hg.1	9.67	8.64	2.04	0.0048	0.0284	FAR1	fatty acyl CoA reductase 1	Multiple_Complex
TC1000008388.hg.1	10.76	8.3	5.52	3.87e-15	3.82e-13	FAS	Fas cell surface death receptor	Multiple_Complex
TC0100010625.hg.1	6.35	4.64	3.26	3.75e-08	9.47e-07	FASLG	Fas ligand (TNF superfamily, member 6)	Coding
TC1700012093.hg.1	10.03	8.55	2.78	0.0005	0.0043	FASN	fatty acid synthase	Multiple_Complex
TSUnmapped00000162.hg.1	13.67	14.79	-2.17	6.72e-08	1.6e-06	FBL	fibrillarin	Coding
TSUnmapped00000344.hg.1	14.35	15.36	-2.01	9.06e-10	3.33e-08	FBL	fibrillarin	Coding
TC0800012478.hg.1	8.28	7.01	2.41	2.35e-06	3.87e-05	FBXL6	F-box and leucine-rich repeat protein 6	Multiple_Complex
TC1800009026.hg.1	3.95	5.42	-2.76	1e-09	3.66e-08	FBXO15	F-box protein 15	Multiple_Complex
TC0800006447.hg.1	7.78	8.8	-2.03	3.41e-05	0.0004	FBXO25	F-box protein 25	Multiple_Complex
TC0800011683.hg.1	7.01	8.93	-3.78	4.02e-09	1.27e-07	FBXO32	F-box protein 32	Multiple_Complex
TC0100010341.hg.1	6.78	8.32	-2.91	0.0006	0.0046	FCER1G	Fc fragment of IgE, high affinity I, receptor for; gamma polypeptide	Multiple_Complex
TSUnmapped00000392.hg.1	5.51	7.16	-3.13	6.01e-08	1.44e-06	FCGBP	Fc fragment of IgG binding protein	Coding
TC1900010676.hg.1	6.6	7.96	-2.57	5.16e-06	7.73e-05	FCGBP	Fc fragment of IgG binding protein	Multiple_Complex
TC0100016185.hg.1	5.65	4.61	2.06	0.0047	0.0278	FCGR3A	Fc fragment of IgG, low affinity IIIa, receptor (CD16a)	Multiple_Complex
TC0100017110.hg.1	9.87	14.33	-22.1	4.24e-26	2.33e-23	FCMR	Fc fragment of IgM receptor	Multiple_Complex
TC0100016049.hg.1	11.84	5.95	59.3	7.73e-14	6.07e-12	FCRL3	Fc receptor-like 3	Multiple_Complex
TC0100010123.hg.1	10.94	9.26	3.2	1.01e-07	2.32e-06	FDPS	farnesyl diphosphate synthase	Multiple_Complex
TC1100013021.hg.1	6.48	5.25	2.34	7.77e-05	0.0008	FEN1	flap structure-specific endonuclease 1	Coding
TC1100007938.hg.1	8.08	6.89	2.28	0.0002	0.0015	FERMT3	fermitin family member 3	Multiple_Complex
TC1100012708.hg.1	10.73	3.9	113.76	1.55e-27	1.07e-24	FEZ1	fasciculation and elongation protein zeta 1	Multiple_Complex
TC0900007971.hg.1	9.96	11.93	-3.94	9.95e-15	9.28e-13	FGD3	FYVE, RhoGEF and PH domain containing 3	Multiple_Complex
TC1700012183.hg.1	5.06	7.7	-6.24	1.94e-14	1.73e-12	FGF11	fibroblast growth factor 11	Multiple_Complex
TC1300006543.hg.1	5.99	8.05	-4.17	6.54e-05	0.0007	FGF9	fibroblast growth factor 9	Multiple_Complex
TC0300011324.hg.1	4.25	5.43	-2.27	4.78e-05	0.0005	FHIT	fragile histidine triad	Multiple_Complex
TC0600011635.hg.1	8.29	9.88	-3.01	7.34e-06	0.0001	FKBP5	FK506 binding protein 5	Multiple_Complex
TC0X00008827.hg.1	7.12	5.65	2.79	4.62e-05	0.0005	FLNA	Memczak2013 ANTISENSE, CDS, coding, INTERNAL best transcript NM_001456	NonCoding
TC0X00011194.hg.1	12.66	10.57	4.27	3.44e-10	1.38e-08	FLNA	filamin A, alpha	Multiple_Complex
TC0X00008826.hg.1	10.66	8.16	5.67	5.29e-07	1.02e-05	FLNA	Jeck2013 ANTISENSE, CDS, coding, INTERNAL, OVCODE, OVEXON best transcript NM_001110556	NonCoding
TC1200012791.hg.1	8.59	7.49	2.14	4e-05	0.0005	FMNL3	formin like 3	Multiple_Complex
TC0900011713.hg.1	15.01	13.5	2.85	2.94e-11	1.47e-09	FNBP1	formin binding protein 1	Multiple_Complex
TC0300009500.hg.1	12.94	11.03	3.74	1.4e-11	7.28e-10	FNDC3B	fibronectin type III domain containing 3B	Multiple_Complex
TC0400009137.hg.1	7.52	8.64	-2.17	6.57e-05	0.0007	FNIP2	folliculin interacting protein 2	Multiple_Complex
TC1100011259.hg.1	6.8	5.04	3.38	7.2e-09	2.14e-07	FOSL1	FOS-like antigen 1	Multiple_Complex
TC0200007096.hg.1	10.06	7.37	6.47	6.84e-10	2.55e-08	FOSL2	FOS-like antigen 2	Multiple_Complex
TC1300008688.hg.1	8.97	10.43	-2.76	1.8e-13	1.3e-11	FOXO1	forkhead box O1	Multiple_Complex
TC0300011485.hg.1	14.46	15.69	-2.34	1.21e-11	6.41e-10	FOXP1	forkhead box P1	Multiple_Complex
TC0300011502.hg.1	5.92	8	-4.23	7.87e-07	1.46e-05	FOXP1; RP11-298C2.1	Transcript Identified by AceView, Entrez Gene ID(s) 27086; novel transcript, sense intronic to FOXP1	NonCoding
TC0X00009667.hg.1	6.74	4.39	5.12	3e-11	1.5e-09	FOXP3	forkhead box P3	Coding
TC0600008006.hg.1	9.63	5.72	14.98	1.51e-22	4.83e-20	FOXP4; MIR4641	forkhead box P4; microRNA 4641	Multiple_Complex
TC1500008335.hg.1	10.32	7.71	6.07	2.12e-08	5.73e-07	FURIN	furin (paired basic amino acid cleaving enzyme)	Multiple_Complex
TC1600007521.hg.1	11.93	10.82	2.16	6.17e-05	0.0007	FUS	FUS RNA binding protein	Multiple_Complex
TC1900012001.hg.1	5.27	6.36	-2.14	0.0039	0.0238	FUZ	fuzzy planar cell polarity protein	Multiple_Complex
TC1400007466.hg.1	7.55	8.57	-2.03	4.96e-07	9.65e-06	FUT8	fucosyltransferase 8 (alpha (1,6) fucosyltransferase)	Multiple_Complex
TC1900011710.hg.1	5.8	7.37	-2.97	8.72e-08	2.02e-06	FXYD7	FXYD domain containing ion transport regulator 7	Multiple_Complex
TC0500010553.hg.1	12.98	14.52	-2.9	2.49e-07	5.23e-06	FYB	FYN binding protein	Multiple_Complex
TC0300010933.hg.1	10.17	8.41	3.37	1.12e-09	4.03e-08	FYCO1	FYVE and coiled-coil domain containing 1	Multiple_Complex
TC0600012875.hg.1	14.35	12.47	3.69	8.47e-11	3.87e-09	FYN	FYN proto-oncogene, Src family tyrosine kinase	Multiple_Complex
TC0X00011211.hg.1	10.13	9.1	2.03	3.7e-06	5.75e-05	G6PD	glucose-6-phosphate dehydrogenase	Multiple_Complex
TC0X00011221.hg.1	9.38	6.87	5.71	1.52e-13	1.13e-11	GAB3	GRB2-associated binding protein 3	Multiple_Complex
TC1500009386.hg.1	10.17	8.95	2.33	1.19e-08	3.39e-07	GABPB1	GA binding protein transcription factor, beta subunit 1	Multiple_Complex
TC0100008664.hg.1	8.79	6.21	5.96	1.43e-10	6.22e-09	GADD45A	growth arrest and DNA-damage-inducible, alpha	Multiple_Complex
TC0700011977.hg.1	4.19	5.97	-3.44	2.7e-14	2.3e-12	GAL3ST4	galactose-3-O-sulfotransferase 4	Multiple_Complex
TC0200007296.hg.1	9.56	6.36	9.19	8.28e-14	6.41e-12	GALM	galactose mutarotase (aldose 1-epimerase)	Multiple_Complex
TC0200014809.hg.1	5.55	4	2.93	1.87e-08	5.12e-07	GALNT3	polypeptide N-acetylgalactosaminyltransferase 3	Multiple_Complex
TC1500010724.hg.1	6.44	8.07	-3.08	3.25e-06	5.13e-05	GANC	glucosidase, alpha; neutral C	Multiple_Complex
TC0700007098.hg.1	13.98	12.25	3.32	1.3e-14	1.18e-12	GARS	glycyl-tRNA synthetase	Multiple_Complex
TC1500010864.hg.1	4.44	6.06	-3.06	5.64e-08	1.37e-06	GATM	glycine amidinotransferase (L-arginine:glycine amidinotransferase)	Multiple_Complex
TC2200009337.hg.1	5.9	6.95	-2.07	2.02e-05	0.0003	GATSL3	GATS protein-like 3	Multiple_Complex
TC0100018451.hg.1	14.49	15.59	-2.15	0.0001	0.0011	GBP2	guanylate binding protein 2, interferon-inducible	Multiple_Complex
TC0200013805.hg.1	6.38	8	-3.09	4.27e-05	0.0005	GCC2	Jeck2013 ANTISENSE, CDS, coding, INTERNAL, intronic, OVCODE, OVEXON best transcript NM_181453	NonCoding
TC0100014966.hg.1	7.58	6.23	2.56	5.65e-07	1.09e-05	GCLM	glutamate-cysteine ligase, modifier subunit	Multiple_Complex
TC0900012141.hg.1	5.99	3.82	4.51	2.33e-13	1.66e-11	GCNT1	glucosaminyl (N-acetyl) transferase 1, core 2	Multiple_Complex
TC0500011157.hg.1	7.01	8.53	-2.86	6.99e-05	0.0008	GCNT4	glucosaminyl (N-acetyl) transferase 4, core 2	Coding
TC1600009953.hg.1	6.36	8.02	-3.16	0.0011	0.0085	GDPD3	glycerophosphodiester phosphodiesterase domain containing 3	Multiple_Complex
TC1900011764.hg.1	9.19	7.65	2.91	1.73e-05	0.0002	GEMIN7	gem nuclear organelle associated protein 7	Multiple_Complex
TC0100014926.hg.1	7.54	6.39	2.23	0.0005	0.0043	GFI1	growth factor independent 1 transcription repressor	Multiple_Complex
TC1600009737.hg.1	12.86	11.63	2.35	2.92e-06	4.65e-05	GGA2	golgi-associated, gamma adaptin ear containing, ARF binding protein 2	Multiple_Complex
TC0100012055.hg.1	9.12	10.5	-2.6	7.33e-07	1.37e-05	GGPS1	geranylgeranyl diphosphate synthase 1	Multiple_Complex
TC2200008078.hg.1	10.39	8.71	3.19	9.97e-09	2.87e-07	GGT2	gamma-glutamyltransferase 2	Multiple_Complex
TC0700013491.hg.1	11.46	12.89	-2.7	6.68e-11	3.12e-09	GIMAP1-GIMAP5; GIMAP5; GIMAP1	GIMAP1-GIMAP5 readthrough; GTPase, IMAP family member 5; GTPase, IMAP family member 1	Multiple_Complex
TC0700009678.hg.1	8.96	11.03	-4.21	5.63e-08	1.37e-06	GIMAP2	GTPase, IMAP family member 2	Multiple_Complex
TC0700009677.hg.1	9.6	11.7	-4.28	2.44e-10	1.01e-08	GIMAP4	GTPase, IMAP family member 4	Multiple_Complex
TC0700013043.hg.1	8.65	9.71	-2.08	4.4e-05	0.0005	GIMAP6	GTPase, IMAP family member 6	Multiple_Complex
TC0700009676.hg.1	11.11	13.66	-5.86	3.8e-14	3.13e-12	GIMAP7	GTPase, IMAP family member 7	Coding
TC0700009675.hg.1	5.81	7.27	-2.75	2e-08	5.41e-07	GIMAP8	GTPase, IMAP family member 8	Multiple_Complex
TC0500011602.hg.1	7.1	8.25	-2.22	0.0003	0.0029	GIN1	gypsy retrotransposon integrase 1	Multiple_Complex
TC1700010248.hg.1	11.33	10.28	2.07	1.23e-05	0.0002	GIT1	G protein-coupled receptor kinase interacting ArfGAP 1	Multiple_Complex
TC0900010580.hg.1	7.48	9.77	-4.89	1.3e-09	4.62e-08	GKAP1	G kinase anchoring protein 1	Multiple_Complex
TC1500007691.hg.1	5.56	6.79	-2.34	0.0002	0.0016	GLCE	glucuronic acid epimerase	Multiple_Complex
TC0900007115.hg.1	8.09	6.13	3.9	1.45e-09	5.14e-08	GLIPR2	GLI pathogenesis-related 2	Multiple_Complex
TC0500011497.hg.1	8.22	10.37	-4.42	3.67e-14	3.05e-12	GLRX	glutaredoxin	Multiple_Complex
TC1900008433.hg.1	14.17	15.37	-2.31	2.72e-06	4.4e-05	GLTSCR2; SNORD23	glioma tumor suppressor candidate region gene 2; small nucleolar RNA, C/D box 23	Multiple_Complex
TC0100016625.hg.1	10.13	7.5	6.2	4.9e-16	5.39e-14	GLUL	glutamate-ammonia ligase	Multiple_Complex
TC0200007929.hg.1	7.64	9	-2.57	0.0031	0.0201	GMCL1	germ cell-less, spermatogenesis associated 1	Multiple_Complex
TC0200010852.hg.1	8.68	7.63	2.07	4.81e-05	0.0005	GMPPA	GDP-mannose pyrophosphorylase A	Multiple_Complex
TC0300013980.hg.1	7.84	6.13	3.26	3.64e-09	1.16e-07	GMPPB	GDP-mannose pyrophosphorylase B	Multiple_Complex
TC1900006616.hg.1	6.32	7.74	-2.66	7.34e-06	0.0001	GNA11	guanine nucleotide binding protein (G protein), alpha 11 (Gq class)	Multiple_Complex
TC0700010075.hg.1	9.68	8.64	2.05	1.65e-05	0.0002	GNA12	guanine nucleotide binding protein (G protein) alpha 12	Multiple_Complex
TC1900006620.hg.1	6.64	5.05	3	3.87e-07	7.76e-06	GNA15	guanine nucleotide binding protein (G protein), alpha 15 (Gq class)	Multiple_Complex
TC1600007944.hg.1	9.34	7.09	4.75	3.36e-09	1.08e-07	GNAO1	guanine nucleotide binding protein (G protein), alpha activating activity polypeptide O	Multiple_Complex
TC0900010485.hg.1	6.47	8.02	-2.92	0.0016	0.0112	GNAQ	guanine nucleotide binding protein (G protein), q polypeptide	Multiple_Complex
TC1400007154.hg.1	12.71	10.25	5.51	2.95e-22	8.78e-20	GNG2	guanine nucleotide binding protein (G protein), gamma 2	Multiple_Complex
TC0100017834.hg.1	7.3	4.28	8.11	8.73e-17	1.1e-14	GNG4	guanine nucleotide binding protein (G protein), gamma 4	Multiple_Complex
TC1900009240.hg.1	5.47	9.23	-13.53	1.12e-15	1.18e-13	GNG7	guanine nucleotide binding protein (G protein), gamma 7	Coding
TC1700011032.hg.1	7.19	5.67	2.88	7.45e-06	0.0001	GNGT2	guanine nucleotide binding protein (G protein), gamma transducing activity polypeptide 2	Coding
TC0200008268.hg.1	15.41	8.02	167.11	6.82e-31	9.15e-28	GNLY	granulysin	Multiple_Complex
TC1200011711.hg.1	10.79	9.51	2.44	5.23e-08	1.28e-06	GNPTAB	N-acetylglucosamine-1-phosphate transferase, alpha and beta subunits	Multiple_Complex
TC0300013058.hg.1	4.78	3.77	2.01	0.0005	0.0043	GOLIM4	golgi integral membrane protein 4	Multiple_Complex
TC1000011585.hg.1	10.24	8.7	2.91	1.1e-08	3.15e-07	GOT1	glutamic-oxaloacetic transaminase 1, soluble	Multiple_Complex
TC0300013599.hg.1	3.45	4.56	-2.16	2.82e-06	4.53e-05	GP5	glycoprotein V (platelet)	Coding
TC0800009237.hg.1	10.26	8.81	2.74	8.35e-06	0.0001	GPAA1	glycosylphosphatidylinositol anchor attachment 1	Multiple_Complex
TC0600011443.hg.1	8.64	9.95	-2.48	1.61e-08	4.48e-07	GPANK1	G-patch domain and ankyrin repeats 1	Coding
TC0200016548.hg.1	5.47	4.34	2.2	0.0036	0.0223	GPD2	glycerol-3-phosphate dehydrogenase 2	Multiple_Complex
TC1900009445.hg.1	12.04	10.72	2.5	6.41e-08	1.53e-06	GPR108; MIR6791	G protein-coupled receptor 108; microRNA 6791	Multiple_Complex
TC0100012089.hg.1	8.91	7.44	2.75	2.81e-12	1.66e-10	GPR137B	G protein-coupled receptor 137B	Multiple_Complex
TC0700013354.hg.1	6.49	4.54	3.86	2.78e-05	0.0003	GPR141	G protein-coupled receptor 141	Multiple_Complex
TC0200014991.hg.1	7.09	10.1	-8.01	3.27e-14	2.73e-12	GPR155	G protein-coupled receptor 155	Multiple_Complex
TC0300012812.hg.1	10.88	8.3	5.99	6.77e-15	6.54e-13	GPR171	G protein-coupled receptor 171	Coding
TC0100010674.hg.1	7.6	5.82	3.42	9.17e-06	0.0001	GPR52	G protein-coupled receptor 52	Coding
TC0X00007977.hg.1	5.33	7.11	-3.42	1.06e-08	3.03e-07	GPRASP1	G protein-coupled receptor associated sorting protein 1	Multiple_Complex
TC0400012947.hg.1	10.71	8.61	4.3	3.11e-10	1.26e-08	GPRIN3	GPRIN family member 3	Coding
TC0300011059.hg.1	10.47	12.42	-3.87	1.42e-12	8.83e-11	GPX1	glutathione peroxidase 1	Multiple_Complex
TC0500009109.hg.1	8.37	6.02	5.12	2.19e-09	7.42e-08	GPX3	glutathione peroxidase 3	Multiple_Complex
TC1100013109.hg.1	7.86	5.29	5.96	3.42e-10	1.38e-08	GRAMD1B	GRAM domain containing 1B	Multiple_Complex
TC1700009995.hg.1	4.84	7.68	-7.15	5.19e-18	8.31e-16	GRAP	GRB2-related adaptor protein	Multiple_Complex
TC1700007153.hg.1	6.04	8.08	-4.11	1.07e-13	8.13e-12	GRAPL	GRB2-related adaptor protein-like	Coding
TC1000009067.hg.1	8.27	9.84	-2.98	1.01e-06	1.81e-05	GRK5	G protein-coupled receptor kinase 5	Multiple_Complex
TC0700013424.hg.1	6.84	8.28	-2.71	3.99e-11	1.94e-09	GS1-259H13.2; TCONS_l2_00026125; TCONS_l2_00026126; ZNF655	transmembrane protein 225-like; Jeck2013 ALT_ACCEPTOR, ALT_DONOR, ncRNA, OVCODE, OVEXON, upstream_start best transcript TCONS_l2_00026125; Salzman2013 ANNOTATED, INTERNAL, ncRNA, OVCODE, OVEXON best transcript TCONS_l2_00026126; novel transcript; Transcript Identified by AceView, Entrez Gene ID(s) 79027	Multiple_Complex
TC0100018263.hg.1	5.85	6.88	-2.04	0.0049	0.0287	GSTM1	glutathione S-transferase mu 1	Multiple_Complex
TC0100018262.hg.1	4.87	6.12	-2.38	0.0009	0.0066	GSTM2	glutathione S-transferase mu 2 (muscle)	Multiple_Complex
TC0500007413.hg.1	12.21	6.53	51.33	3.49e-30	4.16e-27	GZMA	granzyme A	Multiple_Complex
TC1400008764.hg.1	13.61	7.72	59.36	8.01e-30	8.59e-27	GZMB	granzyme B	Coding
TC1400008763.hg.1	12.44	5.67	108.98	2.27e-34	5.42e-31	GZMH	granzyme H	Coding
TC0500007408.hg.1	12.51	8.74	13.7	6e-08	1.44e-06	GZMK	granzyme K	Multiple_Complex
TC0200014509.hg.1	10.75	9.61	2.2	9.83e-07	1.78e-05	GTDC1	glycosyltransferase like domain containing 1	Multiple_Complex
TC1300006683.hg.1	13.18	14.65	-2.76	9.33e-13	6.1e-11	GTF3A	general transcription factor IIIA	Multiple_Complex
TC0700013395.hg.1	7.88	9.29	-2.67	4.46e-05	0.0005	GTPBP10	GTP-binding protein 10 (putative)	Multiple_Complex
TC0300008352.hg.1	10.39	11.5	-2.16	0.0027	0.0177	GTPBP8	GTP-binding protein 8 (putative)	Multiple_Complex
TC1800008988.hg.1	4.22	8.12	-14.93	8.03e-21	1.89e-18	GTSCR1	Gilles de la Tourette syndrome chromosome region, candidate 1 (non-protein coding)	Multiple_Complex
TC0200009189.hg.1	9.63	11.92	-4.91	9.93e-18	1.47e-15	GYPC	glycophorin C (Gerbich blood group)	Multiple_Complex
TC0200014154.hg.1	9.29	11.13	-3.57	1.03e-05	0.0001	GYPC	Memczak2013 ANTISENSE, coding, INTERNAL, UTR3 best transcript NM_016815	NonCoding
TC1200006946.hg.1	9.94	11.12	-2.26	1.85e-05	0.0002	H2AFJ	H2A histone family, member J	Multiple_Complex
TC1100012513.hg.1	9.22	8.21	2.02	3.46e-05	0.0004	H2AFX	H2A histone family, member X	Coding
TC1500010368.hg.1	8.28	9.54	-2.39	2.48e-05	0.0003	HAPLN3	hyaluronan and proteoglycan link protein 3	Multiple_Complex
TC0500012588.hg.1	4.68	5.96	-2.42	5.19e-06	7.75e-05	HAVCR1	hepatitis A virus cellular receptor 1	Multiple_Complex
TC0500012238.hg.1	7.78	6.07	3.27	1.3e-07	2.91e-06	HBEGF	heparin-binding EGF-like growth factor	Multiple_Complex
TC0700008747.hg.1	10.39	11.55	-2.23	6.8e-05	0.0007	HBP1	HMG-box transcription factor 1	Multiple_Complex
TC0700006813.hg.1	5.61	4.36	2.39	2.83e-06	4.54e-05	HDAC9	histone deacetylase 9	Multiple_Complex
TC1500010914.hg.1	7.46	6.02	2.71	0.0003	0.0029	HDGFRP3	hepatoma-derived growth factor, related protein 3; Hepatoma-derived growth factor-related protein 3 [Source:UniProtKB/Swiss-Prot;Acc:Q9Y3E1]; Transcript Identified by AceView, Entrez Gene ID(s) 50810; Jeck2013, Memczak2013, Salzman2013 ANNOTATED, CDS, coding, INTERNAL, OVCODE, OVEXON best transcript NM_016073; Jeck2013 ALT_ACCEPTOR, ALT_DONOR, coding, INTERNAL, intronic best transcript NM_016073;…	Multiple_Complex
TC1400010728.hg.1	5.36	4.11	2.38	0.0004	0.0034	HEATR5A	HEAT repeat containing 5A	Multiple_Complex
TC1200009981.hg.1	6.05	7.44	-2.63	2.15e-08	5.78e-07	HEBP1	heme binding protein 1	Multiple_Complex
TC1000008435.hg.1	7.54	5.9	3.1	2.09e-09	7.14e-08	HECTD2	HECT domain containing E3 ubiquitin protein ligase 2	Multiple_Complex
TC1500010689.hg.1	5.98	7.32	-2.53	2.78e-08	7.29e-07	HERC2P2	hect domain and RLD 2 pseudogene 2	Multiple_Complex
TC0400012826.hg.1	6.75	7.95	-2.3	0.0006	0.0046	HERC3	HECT and RLD domain containing E3 ubiquitin protein ligase 3	Multiple_Complex
TC1700009189.hg.1	8.97	7.68	2.44	0.0002	0.0015	HGS	hepatocyte growth factor-regulated tyrosine kinase substrate	Multiple_Complex
TC0700013458.hg.1	8.81	10.2	-2.61	0.0002	0.0015	HILPDA	hypoxia inducible lipid droplet-associated	Multiple_Complex
TC0600007270.hg.1	8.11	9.83	-3.31	1.5e-10	6.45e-09	HIST1H2AC	histone cluster 1, H2ac	Multiple_Complex
TC0600007285.hg.1	8.74	10.35	-3.04	0.0014	0.0099	HIST1H2AE	histone cluster 1, H2ae	Coding
TC0600014083.hg.1	12.3	14.28	-3.97	7.43e-08	1.75e-06	HIST1H2AG	histone cluster 1, H2ag	Coding
TC0600011228.hg.1	4.93	6.1	-2.25	0.0086	0.0453	HIST1H2AK	histone cluster 1, H2ak	Coding
TC0600007274.hg.1	6.42	7.72	-2.46	4.22e-05	0.0005	HIST1H2BD	histone cluster 1, H2bd	Coding
TC0600007282.hg.1	7.55	8.78	-2.34	0.0009	0.0072	HIST1H2BF	histone cluster 1, H2bf	Coding
TC0600011233.hg.1	12.33	13.59	-2.39	0.0024	0.0159	HIST1H3I	histone cluster 1, H3i	Coding
TC0600007268.hg.1	16.05	17.13	-2.13	0.0002	0.0016	HIST1H4C	histone cluster 1, H4c	Coding
TC0600007284.hg.1	13.23	15.53	-4.92	9.51e-09	2.75e-07	HIST1H4E	histone cluster 1, H4e	Multiple_Complex
TC0600011145.hg.1	6.36	8.05	-3.22	4.86e-05	0.0006	HIST1H4H	histone cluster 1, H4h	Coding
TC0100013873.hg.1	7.9	5.4	5.66	1.73e-14	1.55e-12	HIVEP3	human immunodeficiency virus type I enhancer binding protein 3	Multiple_Complex
TC0200008099.hg.1	6.34	7.36	-2.02	7.35e-05	0.0008	HK2	hexokinase 2	Multiple_Complex
TC0600014277.hg.1	10.8	8.97	3.56	3.03e-08	7.88e-07	HLA-DMA	major histocompatibility complex, class II, DM alpha	Multiple_Complex
TC0600011516.hg.1	3.63	5.72	-4.26	3.48e-11	1.71e-09	HLA-DOA	major histocompatibility complex, class II, DO alpha	Multiple_Complex
TC0600011517.hg.1	11.82	9.87	3.86	7.09e-11	3.28e-09	HLA-DPA1	major histocompatibility complex, class II, DP alpha 1	Multiple_Complex
TC0600007677.hg.1	14.03	12.58	2.73	2.09e-05	0.0003	HLA-DPB1	major histocompatibility complex, class II, DP beta 1	Multiple_Complex
TC0600007657.hg.1	9.63	7.31	4.98	7.75e-06	0.0001	HLA-DQA1	major histocompatibility complex, class II, DQ alpha 1	Multiple_Complex
TC0600011499.hg.1	7.77	6.39	2.6	0.0006	0.0051	HLA-DQB1	major histocompatibility complex, class II, DQ beta 1	Multiple_Complex
TC0600011503.hg.1	9.13	8.01	2.17	0.0002	0.0016	HLA-DQB2	major histocompatibility complex, class II, DQ beta 2	Coding
TC0600014273.hg.1	9.49	6.19	9.82	3.34e-08	8.54e-07	HLA-DRB1	major histocompatibility complex, class II, DR beta 1	Multiple_Complex
TC2000009903.hg.1	13.31	11.78	2.89	3.07e-12	1.81e-10	HM13; MCTS2P	histocompatibility (minor) 13; malignant T-cell amplified sequence 2, pseudogene	Multiple_Complex
TSUnmapped00000077.hg.1	9.59	8.54	2.08	2.41e-05	0.0003	HMBS	hydroxymethylbilane synthase	Coding
TC0600007748.hg.1	9.55	10.94	-2.64	3.17e-10	1.28e-08	HMGA1	high mobility group AT-hook 1	Multiple_Complex
TC0500010635.hg.1	7.45	5.97	2.79	7.2e-06	0.0001	HMGCS1	3-hydroxy-3-methylglutaryl-CoA synthase 1 (soluble)	Multiple_Complex
TC1900006509.hg.1	6.58	8.07	-2.8	2.69e-08	7.08e-07	HMHA1	histocompatibility (minor) HA-1	Multiple_Complex
TC1800009244.hg.1	5.16	3.93	2.35	7.56e-05	0.0008	HMSD	histocompatibility (minor) serpin domain containing	Multiple_Complex
TC1700012468.hg.1	11.28	9.51	3.41	2.2e-14	1.94e-12	HN1	hematological and neurological expressed 1	Multiple_Complex
TC0X00011309.hg.1	8.24	9.35	-2.16	0.0003	0.003	HNRNPH2	heterogeneous nuclear ribonucleoprotein H2 (H)	Coding
TC0200012288.hg.1	8.73	6.41	4.99	1.37e-10	5.97e-09	HNRNPLL	heterogeneous nuclear ribonucleoprotein L-like	Multiple_Complex
TC1900006896.hg.1	12.71	11.71	2.01	2.2e-05	0.0003	HNRNPM	heterogeneous nuclear ribonucleoprotein M	Multiple_Complex
TC1100013175.hg.1	8.5	9.77	-2.41	9.03e-07	1.64e-05	HNRNPUL2-BSCL2	HNRNPUL2-BSCL2 readthrough (NMD candidate)	Multiple_Complex
TC1400010716.hg.1	9.13	10.15	-2.04	3.11e-07	6.36e-06	HOMEZ	homeobox and leucine zipper encoding	Multiple_Complex
TC0100008503.hg.1	7.48	9.76	-4.85	1.62e-09	5.68e-08	HOOK1	hook microtubule-tethering protein 1	Multiple_Complex
TC0400010775.hg.1	5.91	4.19	3.3	1.96e-08	5.32e-07	HOPX	HOP homeobox	Multiple_Complex
TC1700012434.hg.1	5.71	4.35	2.57	7.59e-07	1.41e-05	HOXB7	homeobox B7	Multiple_Complex
TC0200006687.hg.1	6.61	7.93	-2.5	2.3e-09	7.76e-08	HPCAL1	hippocalcin-like 1	Multiple_Complex
TC0100013802.hg.1	6.09	7.15	-2.08	1.94e-06	3.26e-05	HPCAL4	hippocalcin like 4	Coding
TC1800007829.hg.1	6.12	8.54	-5.33	7.23e-11	3.34e-09	HSBP1L1	heat shock factor binding protein 1-like 1	Multiple_Complex
TC0400012945.hg.1	10.35	11.8	-2.72	9.41e-07	1.7e-05	HSD17B11	hydroxysteroid (17-beta) dehydrogenase 11	Multiple_Complex
TC0600009322.hg.1	8.37	10.18	-3.52	3.04e-09	9.89e-08	HSF2	heat shock transcription factor 2	Multiple_Complex
TC1600008146.hg.1	7.59	6.46	2.18	5.82e-05	0.0006	HSF4; FBXL8	heat shock transcription factor 4; F-box and leucine-rich repeat protein 8	Multiple_Complex
TC0900011523.hg.1	11.12	9.6	2.88	1.04e-08	2.99e-07	HSPA5	heat shock 70kDa protein 5 (glucose-regulated protein, 78kDa)	Multiple_Complex
TC1100012613.hg.1	17.91	16.89	2.03	6.63e-10	2.49e-08	HSPA8; SNORD14C; SNORD14D	heat shock 70kDa protein 8; small nucleolar RNA, C/D box 14C; small nucleolar RNA, C/D box 14D	Multiple_Complex
TC0700008090.hg.1	10.17	8.86	2.47	6.06e-06	8.85e-05	HSPB1	heat shock 27kDa protein 1	Multiple_Complex
TC0100013229.hg.1	4.1	6.07	-3.93	1.94e-11	9.93e-10	HSPG2	heparan sulfate proteoglycan 2	Multiple_Complex
TC1300008533.hg.1	13.19	11.68	2.86	1.39e-07	3.08e-06	HSPH1	heat shock 105kDa/110kDa protein 1	Multiple_Complex
TC0X00009767.hg.1	9.5	7.83	3.2	3.92e-09	1.24e-07	HUWE1	HECT, UBA and WWE domain containing 1, E3 ubiquitin protein ligase	Multiple_Complex
TSUnmapped00000517.hg.1	9.66	8.36	2.46	4.72e-08	1.16e-06	HYOU1	hypoxia up-regulated 1	Coding
TSUnmapped00000310.hg.1	8.37	7.06	2.47	9.64e-05	0.001	HYOU1	hypoxia up-regulated 1	Coding
TSUnmapped00000440.hg.1	9.81	8.45	2.56	1.26e-07	2.84e-06	HYOU1	hypoxia up-regulated 1	Coding
TSUnmapped00000383.hg.1	9.35	7.71	3.1	2.93e-08	7.65e-07	HYOU1	hypoxia up-regulated 1	Coding
TSUnmapped00000322.hg.1	9.05	7.4	3.15	1.81e-06	3.07e-05	HYOU1	hypoxia up-regulated 1	Coding
TSUnmapped00000484.hg.1	12.27	10.51	3.39	1.6e-10	6.83e-09	HYOU1	hypoxia up-regulated 1	Coding
TSUnmapped00000244.hg.1	13.22	11.22	4	1.14e-10	5.06e-09	HYOU1	hypoxia up-regulated 1	Coding
TC1100012510.hg.1	14.4	12.37	4.1	1.95e-10	8.24e-09	HYOU1	hypoxia up-regulated 1	Multiple_Complex
TSUnmapped00000777.hg.1	12.11	10.04	4.21	2.39e-14	2.08e-12	HYOU1	hypoxia up-regulated 1	Coding
TSUnmapped00000558.hg.1	11.74	9.66	4.23	1.22e-09	4.36e-08	HYOU1	hypoxia up-regulated 1	NonCoding
TSUnmapped00000138.hg.1	11.98	9.89	4.25	2.59e-14	2.22e-12	HYOU1	hypoxia up-regulated 1	Coding
TSUnmapped00000300.hg.1	12.83	10.56	4.82	7.77e-15	7.37e-13	HYOU1	hypoxia up-regulated 1	Coding
TSUnmapped00000327.hg.1	10.22	7.8	5.34	4.65e-10	1.82e-08	HYOU1	hypoxia up-regulated 1	Coding
TC0900010789.hg.1	9.94	8.57	2.59	7.76e-07	1.44e-05	IARS	isoleucyl-tRNA synthetase	Multiple_Complex
TC0200006627.hg.1	11.38	8.34	8.28	5.72e-18	9.09e-16	ID2	inhibitor of DNA binding 2, dominant negative helix-loop-helix protein	Multiple_Complex
TC0100013293.hg.1	6.39	9.42	-8.16	2.52e-11	1.27e-09	ID3	inhibitor of DNA binding 3, dominant negative helix-loop-helix protein	Multiple_Complex
TC1000009536.hg.1	12.72	11.54	2.27	2.84e-06	4.55e-05	IDI1	isopentenyl-diphosphate delta isomerase 1	Multiple_Complex
TC0100018323.hg.1	6.97	5.6	2.57	2.49e-05	0.0003	IER5	immediate early response 5	Coding
TC0100008816.hg.1	9.1	10.36	-2.39	1.62e-05	0.0002	IFI44	interferon-induced protein 44	Multiple_Complex
TC0100008815.hg.1	6.41	8.33	-3.77	0.0028	0.0181	IFI44L	interferon-induced protein 44-like	Multiple_Complex
TC1000008400.hg.1	3.99	5.76	-3.43	9.28e-06	0.0001	IFIT1	interferon-induced protein with tetratricopeptide repeats 1	Coding
TC1000008396.hg.1	6.01	8.47	-5.51	2.48e-06	4.05e-05	IFIT2	interferon-induced protein with tetratricopeptide repeats 2	Coding
TC1100012949.hg.1	13.84	15.22	-2.6	1.41e-07	3.13e-06	IFITM1	interferon induced transmembrane protein 1	Multiple_Complex
TC1100009657.hg.1	10.9	12.39	-2.81	3.27e-08	8.39e-07	IFITM3	interferon induced transmembrane protein 3	Multiple_Complex
TC1200011177.hg.1	15.95	5.31	1604.34	1.78e-28	1.47e-25	IFNG	interferon, gamma	Multiple_Complex
TC0600013300.hg.1	9	7.77	2.35	0.0006	0.0052	IFNGR1	interferon gamma receptor 1	Multiple_Complex
TC2100006967.hg.1	7.23	10.07	-7.16	3.26e-17	4.46e-15	IFNGR2	interferon gamma receptor 2 (interferon gamma transducer 1)	Multiple_Complex
TC2100006968.hg.1	6.17	7.71	-2.91	0.0046	0.0272	IFNGR2	Memczak2013 ALT_ACCEPTOR, ALT_DONOR, coding, INTERNAL, intronic best transcript NM_005534	NonCoding
TC0X00007529.hg.1	9.96	11.26	-2.47	1.74e-13	1.27e-11	IGBP1	immunoglobulin (CD79A) binding protein 1	Multiple_Complex
TC1500008485.hg.1	6.79	11.81	-32.37	4.94e-27	3.03e-24	IGF1R	insulin-like growth factor 1 receptor	Multiple_Complex
TC0600010066.hg.1	10.68	7.91	6.8	7.17e-17	9.32e-15	IGF2R	insulin-like growth factor 2 receptor	Multiple_Complex
TC0200010745.hg.1	5.93	7.14	-2.32	1.03e-06	1.84e-05	IGFBP2	insulin like growth factor binding protein 2	Multiple_Complex
TC1900011929.hg.1	11.56	9.03	5.76	4.84e-11	2.32e-09	IGFLR1	IGF like family receptor 1	Multiple_Complex
TC0500008846.hg.1	8.76	10.08	-2.49	0.0001	0.0012	IGIP	IgA-inducing protein	Coding
TC0100011374.hg.1	7.09	8.44	-2.55	5.44e-05	0.0006	IKBKE	inhibitor of kappa light polypeptide gene enhancer in B-cells, kinase epsilon	Multiple_Complex
TC0700007505.hg.1	10.02	11.75	-3.33	1.06e-06	1.9e-05	IKZF1	IKAROS family zinc finger 1	Multiple_Complex
TC0100008653.hg.1	10.6	5.96	24.8	6.41e-18	9.98e-16	IL12RB2	interleukin 12 receptor, beta 2	Multiple_Complex
TC0500008642.hg.1	5.75	3.37	5.2	7.31e-13	4.86e-11	IL13	interleukin 13	Multiple_Complex
TC0400008861.hg.1	7.64	5.99	3.12	9.94e-05	0.001	IL15	interleukin 15	Multiple_Complex
TC1000012519.hg.1	9.6	8.12	2.79	4.2e-10	1.66e-08	IL15RA	interleukin 15 receptor, alpha	Multiple_Complex
TC1500010778.hg.1	11.79	14.3	-5.66	7.09e-29	6.27e-26	IL16	interleukin 16	Multiple_Complex
TC2200006501.hg.1	7.45	8.69	-2.36	1.51e-05	0.0002	IL17RA	interleukin 17 receptor A	Multiple_Complex
TC0200016502.hg.1	9.29	6.5	6.9	5.14e-13	3.51e-11	IL18R1	interleukin 18 receptor 1	Multiple_Complex
TC0200008675.hg.1	10.1	4.13	62.62	1.87e-16	2.21e-14	IL18RAP	interleukin 18 receptor accessory protein	Multiple_Complex
TC0400011754.hg.1	5.18	4.07	2.16	4.15e-09	1.31e-07	IL2	interleukin 2	Multiple_Complex
TC1600007315.hg.1	6.59	5.47	2.18	0.0002	0.0018	IL21R	interleukin 21 receptor	Multiple_Complex
TC0100008648.hg.1	5.65	4.18	2.77	3.67e-05	0.0004	IL23R	interleukin 23 receptor	Multiple_Complex
TC0100011391.hg.1	6.62	8.3	-3.21	2.14e-12	1.28e-10	IL24	interleukin 24	Multiple_Complex
TC1000009691.hg.1	15.39	6.73	403.2	1.79e-33	3.84e-30	IL2RA	interleukin 2 receptor, alpha	Coding
TC2200008637.hg.1	12.07	9.96	4.32	6.27e-16	6.83e-14	IL2RB	interleukin 2 receptor, beta	Multiple_Complex
TC0100010078.hg.1	5.66	7.32	-3.15	1.17e-05	0.0002	IL6R	interleukin 6 receptor	Multiple_Complex
TC0500010788.hg.1	9	11.66	-6.34	1.22e-11	6.48e-10	IL6ST	interleukin 6 signal transducer	Multiple_Complex
TC0500007138.hg.1	13.06	14.15	-2.13	0.0014	0.0101	IL7R	interleukin 7 receptor	Multiple_Complex
TC0700012255.hg.1	6.67	7.86	-2.28	1.12e-05	0.0002	IMMP2L	inner mitochondrial membrane peptidase subunit 2	Multiple_Complex
TC0800010524.hg.1	7.69	6.57	2.18	3.44e-05	0.0004	IMPAD1	inositol monophosphatase domain containing 1	Multiple_Complex
TC0400009462.hg.1	7.63	9.07	-2.7	1.63e-05	0.0002	ING2	inhibitor of growth family member 2	Coding
TC1200009747.hg.1	10.02	11.43	-2.66	5.36e-08	1.31e-06	ING4	inhibitor of growth family member 4	Multiple_Complex
TC1000009414.hg.1	4.93	6.48	-2.91	3.99e-07	7.98e-06	INPP5A	inositol polyphosphate-5-phosphatase A	Multiple_Complex
TC1100011735.hg.1	6.5	7.87	-2.59	0.0013	0.0096	INTS4	integrator complex subunit 4	Multiple_Complex
TC0100017229.hg.1	6.26	5.24	2.04	0.0044	0.0265	INTS7	integrator complex subunit 7	Multiple_Complex
TC0600014360.hg.1	12.1	13.51	-2.67	2.46e-09	8.19e-08	IPCEF1	interaction protein for cytohesin exchange factors 1	Multiple_Complex
TC0200016166.hg.1	3.82	5.16	-2.54	5.84e-05	0.0006	IQCA1	IQ motif containing with AAA domain 1	Multiple_Complex
TC1500008312.hg.1	12.06	10.63	2.69	9.81e-08	2.25e-06	IQGAP1	IQ motif containing GTPase activating protein 1	Multiple_Complex
TC1200006438.hg.1	5.46	6.9	-2.72	9.01e-06	0.0001	IQSEC3	IQ motif and Sec7 domain 3	Multiple_Complex
TC0600006442.hg.1	13.99	10.61	10.37	9.25e-17	1.15e-14	IRF4	interferon regulatory factor 4	Multiple_Complex
TC0200015912.hg.1	5.25	6.64	-2.63	4.31e-09	1.35e-07	IRS1	insulin receptor substrate 1	Multiple_Complex
TC1400007679.hg.1	5.25	6.37	-2.18	0.0002	0.002	ISCA2	iron-sulfur cluster assembly 2	Multiple_Complex
TC1900010016.hg.1	7.71	9.68	-3.91	6.89e-10	2.57e-08	ISYNA1	inositol-3-phosphate synthase 1	Multiple_Complex
TC0200010157.hg.1	9.61	8.09	2.87	0.0012	0.0086	ITGA4	integrin alpha 4	Multiple_Complex
TC0200009973.hg.1	8.65	10.73	-4.23	4.2e-07	8.34e-06	ITGA6	integrin alpha 6	Multiple_Complex
TC1000010265.hg.1	13.49	11.17	4.98	4.27e-08	1.06e-06	ITGB1	integrin beta 1	Multiple_Complex
TC0100014428.hg.1	9.05	10.1	-2.07	0.0006	0.0047	ITGB3BP	integrin beta 3 binding protein (beta3-endonexin)	Multiple_Complex
TC0500009210.hg.1	9.2	10.21	-2	4.4e-05	0.0005	ITK	IL2-inducible T-cell kinase	Multiple_Complex
TC0100017534.hg.1	7.33	8.67	-2.53	1.85e-08	5.06e-07	ITPKB	inositol-trisphosphate 3-kinase B	Multiple_Complex
TC0200008501.hg.1	7.7	5.18	5.75	4.54e-12	2.61e-10	ITPRIPL1	inositol 1,4,5-trisphosphate receptor interacting protein-like 1	Coding
TC0100014457.hg.1	13.68	14.76	-2.11	3e-05	0.0004	JAK1	Janus kinase 1	Multiple_Complex
TC0400009897.hg.1	9.03	4.68	20.28	1.78e-24	7.63e-22	JAKMIP1	janus kinase and microtubule interacting protein 1	Multiple_Complex
TC0500012390.hg.1	5.82	4.35	2.77	0.0001	0.0012	JAKMIP2	janus kinase and microtubule interacting protein 2	Multiple_Complex
TC0600007038.hg.1	8.74	7.61	2.19	1.84e-08	5.04e-07	JARID2	jumonji, AT rich interactive domain 2	Multiple_Complex
TC0700007031.hg.1	7.08	5.19	3.72	7.03e-07	1.32e-05	JAZF1	Memczak2013 ANTISENSE, coding, INTERNAL, intronic best transcript NM_175061	NonCoding
TC1000012561.hg.1	12.12	13.31	-2.28	0.0024	0.016	JMJD1C	jumonji domain containing 1C	Multiple_Complex
TC1700011818.hg.1	12.52	11.45	2.1	1.05e-05	0.0001	JMJD6	jumonji domain containing 6	Multiple_Complex
TC0900006442.hg.1	4.39	5.51	-2.18	0.0003	0.0029	KANK1	KN motif and ankyrin repeat domains 1	Multiple_Complex
TC0200015601.hg.1	6.99	8.37	-2.6	9.3e-05	0.001	KANSL1L	KAT8 regulatory NSL complex subunit 1 like	Multiple_Complex
TC1700012415.hg.1	8	9.83	-3.55	4.24e-07	8.41e-06	KAT2A	K(lysine) acetyltransferase 2A	Multiple_Complex
TSUnmapped00000492.hg.1	6.44	7.48	-2.05	0.0056	0.0322	KAT6B	K(lysine) acetyltransferase 6B	Coding
TC1300008511.hg.1	5.64	4.21	2.7	0.0005	0.0041	KATNAL1	katanin p60 subunit A-like 1	Multiple_Complex
TC0300007720.hg.1	6.78	5.61	2.24	2.01e-06	3.36e-05	KBTBD8	kelch repeat and BTB (POZ) domain containing 8	Multiple_Complex
TC0100006675.hg.1	12.73	13.84	-2.16	1.1e-05	0.0001	KCNAB2	potassium channel, voltage gated subfamily A regulatory beta subunit 2	Multiple_Complex
TC0600011733.hg.1	5.71	4.01	3.25	6.84e-16	7.41e-14	KCNK5	potassium channel, two pore domain subfamily K, member 5	Multiple_Complex
TC1200008165.hg.1	4.51	5.79	-2.44	3e-10	1.22e-08	KCNMB4	potassium channel subfamily M regulatory beta subunit 4	Multiple_Complex
TC1100008553.hg.1	5.4	6.51	-2.17	0.0005	0.0043	KCTD21-AS1	KCTD21 antisense RNA 1	Multiple_Complex
TC0700013510.hg.1	11.1	10.07	2.04	2.39e-08	6.36e-07	KDELR2	KDEL (Lys-Asp-Glu-Leu) endoplasmic reticulum protein retention receptor 2	Multiple_Complex
TC1700006772.hg.1	12.63	11.57	2.08	0.0002	0.0022	KDM6B	lysine (K)-specific demethylase 6B	Multiple_Complex
TC0700012798.hg.1	10.83	12.09	-2.41	0.0097	0.0498	KDM7A	lysine (K)-specific demethylase 7A	Multiple_Complex
TC1600009530.hg.1	9.75	10.98	-2.35	1e-06	1.8e-05	KIAA0430; MIR6506	KIAA0430; microRNA 6506	Multiple_Complex
TC1400007310.hg.1	9.01	10.49	-2.79	6.54e-07	1.24e-05	KIAA0586	KIAA0586	Multiple_Complex
TC0400009038.hg.1	9.91	10.92	-2.02	1.08e-08	3.08e-07	KIAA0922	KIAA0922	Multiple_Complex
TC0700012836.hg.1	9.86	11.09	-2.35	3.2e-07	6.53e-06	KIAA1147	KIAA1147	Multiple_Complex
TC1200007251.hg.1	10.36	12.22	-3.63	1.37e-05	0.0002	KIAA1551	KIAA1551	Multiple_Complex
TC0200016454.hg.1	6.01	4.79	2.33	5.29e-05	0.0006	KIAA1841	KIAA1841	Multiple_Complex
TC0900008467.hg.1	6.03	7.79	-3.38	2.05e-10	8.61e-09	KIAA1958	KIAA1958	Multiple_Complex
TC0100006812.hg.1	6.3	4.27	4.09	0.0001	0.0014	KIF1B	kinesin family member 1B	Multiple_Complex
TC1200010407.hg.1	8.02	5.54	5.57	3.02e-14	2.55e-12	KIF21A	kinesin family member 21A	Multiple_Complex
TC0900010582.hg.1	5.61	6.71	-2.14	0.0002	0.0015	KIF27	kinesin family member 27	Multiple_Complex
TC2000007114.hg.1	7.53	6.05	2.79	3.05e-07	6.25e-06	KIF3B	kinesin family member 3B	Multiple_Complex
TC1900008879.hg.1	7.61	5.6	4.03	3.45e-05	0.0004	KIR2DS5; KIR3DL2; KIR2DL1; KIR3DL3; KIR3DL1; KIR2DS4; KIR2DL3; KIR3DS1; KIR2DS2; KIR2DP1; KIR3DP1	killer cell immunoglobulin-like receptor, two domains, short cytoplasmic tail, 5; killer cell immunoglobulin-like receptor, three domains, long cytoplasmic tail, 2; killer cell immunoglobulin-like receptor, two domains, long cytoplasmic tail, 1; killer cell immunoglobulin-like receptor, three domains, long cytoplasmic tail, 3; killer cell immunoglobulin-like receptor, three domains, long cytoplas…	Multiple_Complex
TC0200006674.hg.1	6.53	5.18	2.56	0.0002	0.002	KLF11	Kruppel-like factor 11	Multiple_Complex
TC1900007270.hg.1	7.74	8.9	-2.23	0.0002	0.0019	KLF2	Kruppel-like factor 2	Coding
TC1000009612.hg.1	14.53	12.97	2.96	9.37e-08	2.16e-06	KLF6	Kruppel-like factor 6	Multiple_Complex
TC0200015538.hg.1	10.01	12.65	-6.25	1.69e-11	8.7e-10	KLF7	Kruppel-like factor 7 (ubiquitous)	Multiple_Complex
TC1400007093.hg.1	7.1	8.67	-2.97	5.69e-09	1.72e-07	KLHDC1	kelch domain containing 1	Multiple_Complex
TC0300009673.hg.1	9.09	10.61	-2.88	2.41e-09	8.06e-08	KLHL24	kelch-like family member 24	Multiple_Complex
TC0300013344.hg.1	6.81	8.21	-2.63	1.36e-05	0.0002	KLHL6	kelch-like family member 6	Multiple_Complex
TC1200009872.hg.1	10.44	5.28	35.85	4e-18	6.55e-16	KLRB1	killer cell lectin-like receptor subfamily B, member 1	Coding
TC1200012753.hg.1	8.85	7.1	3.37	0.0004	0.0035	KLRC2	killer cell lectin-like receptor subfamily C, member 2	Coding
TC1200006788.hg.1	13.48	6.12	163.76	6.36e-33	1.24e-29	KLRD1	killer cell lectin-like receptor subfamily D, member 1	Multiple_Complex
TC1200006773.hg.1	7.1	5.7	2.65	4.51e-05	0.0005	KLRF1	killer cell lectin-like receptor subfamily F, member 1	Multiple_Complex
TC1200006738.hg.1	10.18	6.51	12.73	8.18e-14	6.36e-12	KLRG1	killer cell lectin-like receptor subfamily G, member 1	Multiple_Complex
TC1700008719.hg.1	9.95	7.68	4.83	1.3e-17	1.9e-15	KPNA2	karyopherin alpha 2 (RAG cohort 1, importin alpha 1)	Multiple_Complex
TC0600009240.hg.1	10.78	11.78	-2	0.0004	0.0035	KPNA5	karyopherin alpha 5 (importin alpha 6)	Multiple_Complex
TC1200010764.hg.1	4.06	5.45	-2.62	1.95e-06	3.28e-05	KRT73	keratin 73, type II	Multiple_Complex
TC1700012215.hg.1	9.95	8.58	2.58	7.24e-07	1.36e-05	KSR1	kinase suppressor of ras 1	Multiple_Complex
TC1200006644.hg.1	6.41	4.9	2.84	1.41e-09	5e-08	LAG3	lymphocyte-activation gene 3	Multiple_Complex
TC1900011414.hg.1	8.36	7.1	2.41	8.14e-05	0.0009	LAIR1	leukocyte-associated immunoglobulin-like receptor 1	Multiple_Complex
TC0700008527.hg.1	11.24	12.24	-2	1.38e-09	4.92e-08	LAMTOR4	late endosomal/lysosomal adaptor, MAPK and MTOR activator 4	Multiple_Complex
TC0700007610.hg.1	9.11	6.9	4.64	4.92e-06	7.42e-05	LANCL2	LanC lantibiotic synthetase component C-like 2 (bacterial)	Multiple_Complex
TC0100013534.hg.1	11.4	12.74	-2.52	2.6e-08	6.86e-07	LAPTM5	lysosomal protein transmembrane 5	Multiple_Complex
TC1600011368.hg.1	10.6	12.14	-2.92	1.87e-09	6.5e-08	LAT	linker for activation of T-cells	Multiple_Complex
TC0100011270.hg.1	8.02	6.86	2.24	0.0043	0.026	LAX1	lymphocyte transmembrane adaptor 1	Multiple_Complex
TC1100009024.hg.1	4.2	7.19	-7.99	7.15e-14	5.66e-12	LAYN	layilin	Multiple_Complex
TC0100007676.hg.1	7.87	9.71	-3.57	2.37e-09	7.93e-08	LCK	LCK proto-oncogene, Src family tyrosine kinase	Multiple_Complex
TC1000011669.hg.1	10.34	11.51	-2.25	4.61e-06	7e-05	LDB1	LIM domain binding 1	Multiple_Complex
TC1200010109.hg.1	11.3	13.06	-3.38	1.23e-16	1.51e-14	LDHB	lactate dehydrogenase B	Multiple_Complex
TC1900007012.hg.1	8.6	6.47	4.39	1.2e-06	2.1e-05	LDLR; MIR6886	low density lipoprotein receptor; microRNA 6886	Multiple_Complex
TC1800006757.hg.1	10.23	11.98	-3.35	7.3e-06	0.0001	LDLRAD4	low density lipoprotein receptor class A domain containing 4	Multiple_Complex
TC0100007406.hg.1	8.22	12.92	-26.09	5.03e-30	5.68e-27	LDLRAP1	low density lipoprotein receptor adaptor protein 1	Multiple_Complex
TC0X00010989.hg.1	5.67	7.35	-3.21	2.55e-06	4.15e-05	LDOC1	leucine zipper, down-regulated in cancer 1	Multiple_Complex
TC0400011548.hg.1	10.81	15.22	-21.27	3.16e-28	2.51e-25	LEF1	lymphoid enhancer-binding factor 1	Multiple_Complex
TC0800012287.hg.1	12.39	14.39	-4.01	4.57e-17	6.13e-15	LEPROTL1	leptin receptor overlapping transcript-like 1	Multiple_Complex
TC1200007630.hg.1	8.36	9.87	-2.84	5.04e-12	2.87e-10	LETMD1	LETM1 domain containing 1	Multiple_Complex
TC2200007312.hg.1	14.99	11.55	10.86	1.65e-15	1.7e-13	LGALS1	lectin, galactoside-binding, soluble, 1	Multiple_Complex
TC1400007227.hg.1	8.3	6.45	3.61	1.28e-10	5.6e-09	LGALS3	lectin, galactoside-binding, soluble, 3	Multiple_Complex
TC1400010012.hg.1	5.93	8.39	-5.48	6.4e-11	3e-09	LGMN	legumain	Multiple_Complex
TC1000012505.hg.1	7.65	8.71	-2.08	3.83e-06	5.94e-05	LHPP	phospholysine phosphohistidine inorganic pyrophosphate phosphatase	Multiple_Complex
TC1900011799.hg.1	7.69	6.14	2.93	0.0002	0.0016	LILRB1	leukocyte immunoglobulin-like receptor, subfamily B (with TM and ITIM domains), member 1	Multiple_Complex
TC1200010655.hg.1	9.39	8.07	2.5	0.0012	0.0091	LIMA1	LIM domain and actin binding 1	Multiple_Complex
TC1700011418.hg.1	8.86	9.9	-2.05	8.98e-07	1.63e-05	LIMD2	LIM domain containing 2	Multiple_Complex
TC0700011508.hg.1	10.74	9.16	2.99	0.0003	0.0029	LIMK1	Memczak2013 ANTISENSE, CDS, coding, INTERNAL best transcript NM_001204426	NonCoding
TC0600011387.hg.1	6.28	7.76	-2.8	3.48e-06	5.45e-05	LINC00243	long intergenic non-protein coding RNA 243	NonCoding
TC0100011269.hg.1	8.68	6.72	3.9	6.72e-06	9.68e-05	LINC00260	long intergenic non-protein coding RNA 260	Multiple_Complex
TC2000009957.hg.1	8.37	9.43	-2.07	0.001	0.0076	LINC00266-1	long intergenic non-protein coding RNA 266-1	Multiple_Complex
TC1300008998.hg.1	4.21	5.6	-2.61	6.7e-08	1.6e-06	LINC00282	long intergenic non-protein coding RNA 282	NonCoding
TC2000009895.hg.1	11.7	12.84	-2.21	4.45e-09	1.39e-07	LINC00493	long intergenic non-protein coding RNA 493	Multiple_Complex
TC1200009846.hg.1	9.8	6.82	7.93	1.91e-08	5.21e-07	LINC00612	long intergenic non-protein coding RNA 612	Multiple_Complex
TC2100006982.hg.1	5.55	6.72	-2.25	0.0018	0.0124	LINC00649	long intergenic non-protein coding RNA 649	Multiple_Complex
TC1200012860.hg.1	9.25	11.15	-3.74	1.95e-12	1.18e-10	LINC01089	long intergenic non-protein coding RNA 1089	NonCoding
TC1500010787.hg.1	13.05	14.34	-2.45	6.44e-10	2.43e-08	LINC01578	long intergenic non-protein coding RNA 1578	NonCoding
TC1400010748.hg.1	8.71	6.71	3.99	3.03e-09	9.86e-08	LINC01588	long intergenic non-protein coding RNA 1588	Multiple_Complex
TC1500010119.hg.1	9.16	7.95	2.33	1.11e-05	0.0001	LINGO1	leucine rich repeat and Ig domain containing 1	Multiple_Complex
TC0200016498.hg.1	4.35	5.36	-2	0.0001	0.0014	LIPT1	lipoyltransferase 1	Multiple_Complex
TC1800008824.hg.1	12.56	11.47	2.13	2.36e-07	4.97e-06	LMAN1	lectin, mannose-binding, 1	Multiple_Complex
TC0500012965.hg.1	13.43	12.02	2.67	5.45e-13	3.69e-11	LMAN2	lectin, mannose-binding 2	Multiple_Complex
TC1600008991.hg.1	5.89	7.45	-2.95	2.47e-06	4.04e-05	LMF1	lipase maturation factor 1	Multiple_Complex
TC0300010077.hg.1	4.44	5.78	-2.54	0.0002	0.0019	LMLN	leishmanolysin-like (metallopeptidase M8 family)	Multiple_Complex
TC0100010152.hg.1	8.27	5.16	8.63	1.12e-12	7.15e-11	LMNA	lamin A/C	Multiple_Complex
TC0500008544.hg.1	6.48	5.09	2.62	5.05e-07	9.77e-06	LMNB1	lamin B1	Multiple_Complex
TC0100008938.hg.1	8.17	6.8	2.57	2.02e-05	0.0003	LMO4	LIM domain only 4	Multiple_Complex
TC1300009980.hg.1	5.18	8.39	-9.26	9.76e-13	6.31e-11	LMO7	LIM domain 7	Multiple_Complex
TC0500008157.hg.1	13.66	14.85	-2.28	2.82e-08	7.38e-07	LNPEP	leucyl/cystinyl aminopeptidase	Multiple_Complex
TC2200009352.hg.1	8.77	6.79	3.94	0.0006	0.0052	LOC400927; CSNK1E	TPTE and PTEN homologous inositol lipid phosphatase pseudogene; Transcript Identified by AceView, Entrez Gene ID(s) 1454; 400927	Multiple_Complex
TC0500013271.hg.1	8.14	9.44	-2.46	8.24e-07	1.52e-05	LOC728554; THOC3	THO complex 3 pseudogene; Homo sapiens THO complex 3, mRNA (cDNA clone MGC:5469 IMAGE:3451612), complete cds.; Homo sapiens THO complex 3, mRNA (cDNA clone MGC:87233 IMAGE:5262880), complete cds.; Salzman2013 ANNOTATED, INTERNAL, ncRNA, OVERLAPTX, OVEXON best transcript NR_003615; Transcript Identified by AceView, Entrez Gene ID(s) 728554	Multiple_Complex
TC0100009112.hg.1	5.38	6.92	-2.92	1.57e-10	6.73e-09	LOC729970; RP4-639F20.1	hCG2028352-like; novel transcript	NonCoding
TC1700007152.hg.1	4.65	6.23	-2.99	1.6e-06	2.75e-05	LOC79999; LOC388436; AC007952.5	Homo sapiens uncharacterized LOC79999 (LOC79999), mRNA.; uncharacterized protein ENSP00000382042; novel transcript	Multiple_Complex
TC1700010004.hg.1	5.66	7.76	-4.29	1.23e-07	2.78e-06	LOC79999; LOC388436; AC007952.6	Homo sapiens uncharacterized LOC79999 (LOC79999), mRNA.; Homo sapiens uncharacterized protein ENSP00000382042 (LOC388436), mRNA.; novel transcript antisense to GRAPL	Multiple_Complex
TC1700012206.hg.1	5.04	7.41	-5.19	6.94e-08	1.65e-06	LOC79999; LOC388436; RP11-744A16.4	uncharacterized LOC79999; Homo sapiens uncharacterized protein ENSP00000382042 (LOC388436), mRNA.; novel transcript	Multiple_Complex
TC1300008892.hg.1	12.22	9.87	5.09	3.62e-07	7.33e-06	LPAR6	lysophosphatidic acid receptor 6	Multiple_Complex
TC0100017223.hg.1	6.84	5.44	2.63	1.03e-09	3.75e-08	LPGAT1	lysophosphatidylglycerol acyltransferase 1	Multiple_Complex
TSUnmapped00000585.hg.1	9.18	7.49	3.23	2.65e-07	5.51e-06	LRIG1		NonCoding
TC0300011423.hg.1	8.27	6.48	3.45	1.98e-06	3.31e-05	LRIG1	leucine-rich repeats and immunoglobulin-like domains 1	Multiple_Complex
TSUnmapped00000154.hg.1	4.75	7.05	-4.94	1.13e-12	7.18e-11	LRP6	LDL receptor related protein 6	Coding
TSUnmapped00000267.hg.1	4.05	5.8	-3.36	2.22e-09	7.49e-08	LRP6	LDL receptor related protein 6	Coding
TSUnmapped00000106.hg.1	4.47	5.87	-2.65	2.13e-08	5.75e-07	LRP6	LDL receptor related protein 6	NonCoding
TC0100014228.hg.1	9.52	6.78	6.68	1.69e-15	1.73e-13	LRP8	LDL receptor related protein 8	Multiple_Complex
TC0600007231.hg.1	5.42	6.71	-2.45	6.7e-06	9.67e-05	LRRC16A	leucine rich repeat containing 16A	Multiple_Complex
TC1200012590.hg.1	5.71	7.19	-2.8	4.16e-07	8.27e-06	LRRC23	leucine rich repeat containing 23	Multiple_Complex
TC1500008511.hg.1	7.32	8.32	-2	0.0043	0.0259	LRRC28	leucine rich repeat containing 28	Multiple_Complex
TC1100011694.hg.1	6.84	5.18	3.14	2.06e-09	7.07e-08	LRRC32	leucine rich repeat containing 32	Multiple_Complex
TC1700012227.hg.1	6.74	8.26	-2.86	2.93e-08	7.65e-07	LRRC37B	leucine rich repeat containing 37B	NonCoding
TC1700011097.hg.1	8.79	7.31	2.78	7.3e-08	1.72e-06	LRRC59	leucine rich repeat containing 59	Multiple_Complex
TC0100018247.hg.1	8.82	10.87	-4.12	2.1e-09	7.17e-08	LRRC8D	leucine rich repeat containing 8 family, member D	Multiple_Complex
TC0700008809.hg.1	6.78	12.26	-44.69	5.97e-22	1.6e-19	LRRN3	leucine rich repeat neuronal 3	Multiple_Complex
TC0700010678.hg.1	9.16	10.44	-2.43	0.0002	0.0021	LSM5	LSM5 homolog, U6 small nuclear RNA and mRNA degradation associated	Multiple_Complex
TC1900007844.hg.1	6.35	7.69	-2.54	3.64e-08	9.22e-07	LSR	lipolysis stimulated lipoprotein receptor	Multiple_Complex
TC0600007595.hg.1	8.63	6.69	3.85	1.1e-12	7.07e-11	LTA	lymphotoxin alpha	Multiple_Complex
TC1200011599.hg.1	10.65	11.73	-2.12	1.07e-06	1.9e-05	LTA4H	leukotriene A4 hydrolase	Multiple_Complex
TC0600011438.hg.1	12.91	15.26	-5.08	1.08e-07	2.46e-06	LTB	lymphotoxin beta (TNF superfamily, member 3)	Multiple_Complex
TC1900008114.hg.1	6.13	5.12	2.01	1.24e-06	2.17e-05	LTBP4	Transcript Identified by AceView, Entrez Gene ID(s) 8425	Unassigned
TC0100010314.hg.1	6.44	7.82	-2.6	2.29e-06	3.78e-05	LY9	lymphocyte antigen 9	Multiple_Complex
TC0800007978.hg.1	5.59	7.59	-4	8.09e-09	2.37e-07	LY96	lymphocyte antigen 96	Coding
TC1900010847.hg.1	4.05	5.53	-2.8	2.04e-09	7e-08	LYPD3	LY6/PLAUR domain containing 3	Multiple_Complex
TC0100018344.hg.1	8.15	9.29	-2.21	0.0012	0.0087	LYPLAL1	lysophospholipase-like 1	Multiple_Complex
TC1200007105.hg.1	6.16	8.9	-6.68	1.22e-13	9.21e-12	LYRM5	LYR motif containing 5	Multiple_Complex
TC1500009438.hg.1	6.56	7.74	-2.26	2.48e-05	0.0003	LYSMD2	LysM, putative peptidoglycan-binding, domain containing 2	Coding
TC0100017836.hg.1	14.55	12.05	5.65	4.7e-12	2.7e-10	LYST	lysosomal trafficking regulator	Multiple_Complex
TC1600010951.hg.1	10.93	5.26	50.95	6.16e-38	2.2e-34	MAF	v-maf avian musculoaponeurotic fibrosarcoma oncogene homolog	Coding
TC0X00010130.hg.1	13.6	12.42	2.25	1.25e-05	0.0002	MAGT1	magnesium transporter 1	Multiple_Complex
TC0200008452.hg.1	8.7	12.54	-14.3	1.53e-17	2.19e-15	MAL	mal, T-cell differentiation protein	Multiple_Complex
TC0X00008712.hg.1	7	3.85	8.84	1.41e-18	2.46e-16	MAMLD1	mastermind-like domain containing 1	Multiple_Complex
TC0600013010.hg.1	8.75	7.49	2.4	2.17e-07	4.64e-06	MAN1A1	mannosidase, alpha, class 1A, member 1	Multiple_Complex
TC0100007412.hg.1	7.86	11.42	-11.8	6.51e-20	1.36e-17	MAN1C1	mannosidase, alpha, class 1C, member 1	Multiple_Complex
TC0300007437.hg.1	13.3	11.86	2.72	6.71e-10	2.51e-08	MANF	mesencephalic astrocyte-derived neurotrophic factor	Multiple_Complex
TC1000007176.hg.1	11.62	7.15	22.18	8.05e-22	2.08e-19	MAP3K8	mitogen-activated protein kinase kinase kinase 8	Multiple_Complex
TC0300010999.hg.1	10.72	9.31	2.66	2.75e-09	9.08e-08	MAP4	microtubule associated protein 4	Multiple_Complex
TC1400009131.hg.1	10.22	8.99	2.34	3.13e-07	6.38e-06	MAP4K5	mitogen-activated protein kinase kinase kinase kinase 5	Multiple_Complex
TC1000007564.hg.1	10.76	11.88	-2.18	5.66e-05	0.0006	MAPK8	mitogen-activated protein kinase 8	Multiple_Complex
TC0300007432.hg.1	10.69	9.18	2.86	9.14e-10	3.35e-08	MAPKAPK3	mitogen-activated protein kinase-activated protein kinase 3	Multiple_Complex
TC0500011935.hg.1	4.55	6.37	-3.53	4.42e-07	8.72e-06	MARCH3	membrane associated ring finger 3	Multiple_Complex
TC1000010497.hg.1	7.14	8.17	-2.04	4.68e-07	9.18e-06	MARCH8	membrane associated ring finger 8	Multiple_Complex
TC1200012650.hg.1	9.48	7.74	3.34	4.86e-07	9.48e-06	MARS; MIR6758	methionyl-tRNA synthetase; microRNA 6758	Multiple_Complex
TC0200008259.hg.1	9.9	8.73	2.26	0.0007	0.0056	MAT2A	methionine adenosyltransferase II, alpha	Multiple_Complex
TC0600012293.hg.1	9.24	6.89	5.09	6.57e-14	5.22e-12	MB21D1	Mab-21 domain containing 1	Multiple_Complex
TC0800010021.hg.1	4.86	6	-2.2	1.07e-06	1.9e-05	MBOAT4	membrane bound O-acyltransferase domain containing 4	Coding
TC1800009112.hg.1	9.26	8.08	2.26	5.4e-07	1.04e-05	MBP	myelin basic protein	Multiple_Complex
TC2200007206.hg.1	7.19	6.16	2.04	0.0022	0.0151	MCM5	minichromosome maintenance complex component 5	Multiple_Complex
TC0700011969.hg.1	6.57	7.61	-2.05	0.0024	0.0157	MCM7	minichromosome maintenance complex component 7	Multiple_Complex
TC0100014768.hg.1	8.07	4.64	10.78	1.2e-11	6.41e-10	MCOLN2	mucolipin 2	Multiple_Complex
TC1500010792.hg.1	7.21	5.29	3.8	2.32e-08	6.19e-07	MCTP2	multiple C2 domains, transmembrane 2	Multiple_Complex
TC0700008857.hg.1	9.73	6.89	7.16	7.08e-15	6.81e-13	MDFIC	MyoD family inhibitor domain containing	Multiple_Complex
TC1400010725.hg.1	10.04	11.16	-2.16	0.0001	0.0013	MDP1; NEDD8-MDP1; NEDD8; CHMP4A	magnesium-dependent phosphatase 1; NEDD8-MDP1 readthrough; neural precursor cell expressed, developmentally down-regulated 8; charged multivesicular body protein 4A	Multiple_Complex
TC1700009293.hg.1	12.91	8.42	22.44	3.56e-19	6.75e-17	METRNL	meteorin, glial cell differentiation regulator-like	Multiple_Complex
TC0200015548.hg.1	8.87	10.15	-2.42	9.44e-05	0.001	METTL21A	methyltransferase like 21A	Multiple_Complex
TC1200008318.hg.1	8.67	9.86	-2.27	6.04e-05	0.0007	METTL25	methyltransferase like 25	Multiple_Complex
TC0200014899.hg.1	8.19	7.04	2.21	0.0002	0.0017	METTL8	methyltransferase like 8	Multiple_Complex
TC2200008654.hg.1	9.72	11.22	-2.82	4.58e-06	6.98e-05	MFNG	MFNG O-fucosylpeptide 3-beta-N-acetylglucosaminyltransferase	Multiple_Complex
TC0400009790.hg.1	12.08	10.34	3.35	9.23e-12	5e-10	MFSD10	major facilitator superfamily domain containing 10	Multiple_Complex
TC0900008028.hg.1	9.42	8.36	2.08	6.49e-06	9.41e-05	MFSD14B	major facilitator superfamily domain containing 14B	Multiple_Complex
TC0100007936.hg.1	6.1	5.02	2.12	4.34e-07	8.59e-06	MFSD2A	major facilitator superfamily domain containing 2A	Multiple_Complex
TC1400007087.hg.1	9.56	8.22	2.54	4.5e-10	1.77e-08	MGAT2	mannosyl (alpha-1,6-)-glycoprotein beta-1,2-N-acetylglucosaminyltransferase	Coding
TC0200013595.hg.1	9.17	12.1	-7.62	1.15e-14	1.05e-12	MGAT4A	mannosyl (alpha-1,3-)-glycoprotein beta-1,4-N-acetylglucosaminyltransferase, isozyme A	Multiple_Complex
TC0600009095.hg.1	10.92	9.57	2.55	0.0037	0.0232	MICAL1	Jeck2013 ANTISENSE, coding, INTERNAL, intronic best transcript NM_022765	NonCoding
TC1100012966.hg.1	8.63	6.52	4.31	3.21e-11	1.58e-09	MICAL2	microtubule associated monooxygenase, calponin and LIM domain containing 2	Multiple_Complex
TC0800006860.hg.1	3.9	5.85	-3.88	4.06e-11	1.97e-09	MICU3	mitochondrial calcium uptake family, member 3	Multiple_Complex
TC0700012812.hg.1	9.47	10.47	-2.01	1.21e-05	0.0002	MKRN1	makorin ring finger protein 1	Multiple_Complex
TC1400009709.hg.1	7.19	8.49	-2.46	0.0003	0.0029	MLH3	mutL homolog 3	Multiple_Complex
TC0900009673.hg.1	13.16	14.41	-2.38	4.81e-07	9.41e-06	MLLT3	myeloid/lymphoid or mixed-lineage leukemia; translocated to, 3	Multiple_Complex
TC0600010235.hg.1	6.4	4.9	2.83	8.2e-07	1.51e-05	MLLT4	myeloid/lymphoid or mixed-lineage leukemia; translocated to, 4	Multiple_Complex
TC1200009196.hg.1	5.8	8.09	-4.9	3.98e-13	2.75e-11	MLXIP	MLX interacting protein	Multiple_Complex
TSUnmapped00000103.hg.1	10.26	11.93	-3.2	2.62e-12	1.56e-10	MLXIP	MLX interacting protein	NonCoding
TSUnmapped00000683.hg.1	6.02	7.68	-3.16	5.68e-09	1.72e-07	MLXIP	MLX interacting protein	NonCoding
TSUnmapped00000502.hg.1	9.28	10.76	-2.8	5.16e-13	3.52e-11	MLXIP	MLX interacting protein	NonCoding
TSUnmapped00000486.hg.1	6.51	7.99	-2.79	7.42e-13	4.91e-11	MLXIP	MLX interacting protein	Coding
TSUnmapped00000050.hg.1	6.22	7.47	-2.39	3.73e-08	9.43e-07	MLXIP	MLX interacting protein	Coding
TSUnmapped00000285.hg.1	6.98	8.05	-2.1	3.24e-08	8.33e-07	MLXIP	MLX interacting protein	Coding
TC0500010717.hg.1	6.99	8.59	-3.02	1.44e-07	3.18e-06	MOCS2	molybdenum cofactor synthesis 2	Multiple_Complex
TC2100008506.hg.1	8.88	10.39	-2.86	8.5e-09	2.47e-07	MORC3	MORC family CW-type zinc finger 3	Multiple_Complex
TC1700006758.hg.1	8.77	7.61	2.24	5e-05	0.0006	MPDU1	mannose-P-dolichol utilization defect 1	Multiple_Complex
TC1500007860.hg.1	9.56	10.91	-2.55	3.97e-10	1.58e-08	MPI	mannose phosphate isomerase	Multiple_Complex
TC1000012536.hg.1	6.49	9.05	-5.92	3.21e-11	1.58e-09	MPP7	membrane protein, palmitoylated 7	Multiple_Complex
TC2200007277.hg.1	5.33	4.2	2.19	7.25e-07	1.36e-05	MPST	mercaptopyruvate sulfurtransferase	Multiple_Complex
TC0100010514.hg.1	8.69	7.44	2.38	2.86e-06	4.57e-05	MPZL1	myelin protein zero-like 1	Multiple_Complex
TC1700012313.hg.1	8.84	7.7	2.2	7.96e-08	1.87e-06	MRPL12	mitochondrial ribosomal protein L12	Multiple_Complex
TC1700007700.hg.1	9.25	10.49	-2.37	1.82e-08	5.01e-07	MRPL45	mitochondrial ribosomal protein L45	Multiple_Complex
TC0100017587.hg.1	10.91	11.93	-2.03	0.0025	0.0165	MRPL55	mitochondrial ribosomal protein L55	Multiple_Complex
TC1700011233.hg.1	8.24	7.1	2.21	0.0011	0.0085	MRPS23	mitochondrial ribosomal protein S23	Multiple_Complex
TC0700012824.hg.1	9.07	10.28	-2.32	3.61e-07	7.31e-06	MRPS33	mitochondrial ribosomal protein S33	Multiple_Complex
TC0100007160.hg.1	6.87	5.48	2.61	3.02e-08	7.85e-07	MRTO4	MRT4 homolog, ribosome maturation factor	Multiple_Complex
TC0800010783.hg.1	7.11	5.04	4.22	5.06e-10	1.97e-08	MSC	musculin	Multiple_Complex
TC0600007610.hg.1	6.21	5.21	2.01	0.0007	0.0054	MSH5; MSH5-SAPCD1; SAPCD1	mutS homolog 5; MSH5-SAPCD1 readthrough (NMD candidate); suppressor APC domain containing 1	Multiple_Complex
TC0X00006614.hg.1	9.93	11.58	-3.15	3.03e-12	1.78e-10	MSL3	male-specific lethal 3 homolog (Drosophila)	Multiple_Complex
TC0400009221.hg.1	12.53	11.14	2.61	4.07e-08	1.02e-06	MSMO1	methylsterol monooxygenase 1	Multiple_Complex
TC1600009074.hg.1	11.25	10.19	2.09	0.0079	0.0422	MSRB1	methionine sulfoxide reductase B1	Multiple_Complex
TC1600007959.hg.1	8.69	7.15	2.92	0.0047	0.0278	MT1E	metallothionein 1E	Multiple_Complex
TC0200007363.hg.1	7.74	8.9	-2.25	4.77e-07	9.33e-06	MTA3	metastasis associated 1 family member 3	Multiple_Complex
TC1200011811.hg.1	8.28	9.32	-2.06	0.0012	0.009	MTERF2	mitochondrial transcription termination factor 2	Multiple_Complex
TC0200016344.hg.1	8.12	10.01	-3.7	2.19e-06	3.63e-05	MTERF4	mitochondrial transcription termination factor 4	Multiple_Complex
TC0600009851.hg.1	6.66	5.53	2.19	1.84e-05	0.0002	MTHFD1L	methylenetetrahydrofolate dehydrogenase (NADP+ dependent) 1-like	Multiple_Complex
TC0200008071.hg.1	8.21	6.91	2.47	2.19e-09	7.42e-08	MTHFD2	methylenetetrahydrofolate dehydrogenase (NADP+ dependent) 2, methenyltetrahydrofolate cyclohydrolase	Multiple_Complex
TC1500010900.hg.1	7.36	8.49	-2.18	7e-05	0.0008	MTHFS	5,10-methenyltetrahydrofolate synthetase (5-formyltetrahydrofolate cyclo-ligase)	Multiple_Complex
TC1300008439.hg.1	8.26	9.32	-2.08	7.66e-05	0.0008	MTIF3	mitochondrial translational initiation factor 3	Multiple_Complex
TC1300008720.hg.1	6.85	7.98	-2.19	0.001	0.0078	MTRF1	mitochondrial translational release factor 1	Multiple_Complex
TC0800011713.hg.1	8.11	6.2	3.77	8.97e-05	0.0009	MTSS1	metastasis suppressor 1	Multiple_Complex
TC1600011560.hg.1	5.18	7.7	-5.74	1.93e-12	1.17e-10	MTSS1L	metastasis suppressor 1-like	Multiple_Complex
TC0800009735.hg.1	5.76	8.16	-5.26	1.35e-13	1.02e-11	MTUS1	microtubule associated tumor suppressor 1	Multiple_Complex
TC2100007208.hg.1	8.9	10.22	-2.5	0.0008	0.006	MX1	MX dynamin-like GTPase 1	Multiple_Complex
TC2100007205.hg.1	7.49	8.89	-2.64	0.0006	0.0048	MX2	MX dynamin-like GTPase 2	Multiple_Complex
TC1000008881.hg.1	13.26	14.43	-2.26	2.79e-09	9.18e-08	MXI1	MAX interactor 1, dimerization protein	Multiple_Complex
TC1700011815.hg.1	12.97	10.02	7.75	2.57e-14	2.22e-12	MXRA7	matrix-remodelling associated 7	Multiple_Complex
TC0600009534.hg.1	9	10.94	-3.83	9.67e-08	2.22e-06	MYB	v-myb avian myeloblastosis viral oncogene homolog	Multiple_Complex
TC0800010685.hg.1	7.92	5.31	6.08	5.93e-11	2.8e-09	MYBL1	v-myb avian myeloblastosis viral oncogene homolog-like 1	Multiple_Complex
TC1900009357.hg.1	8.33	7.11	2.32	8.26e-05	0.0009	MYDGF	myeloid-derived growth factor	Multiple_Complex
TC0400006472.hg.1	6.67	8.51	-3.57	1.53e-10	6.57e-09	MYL5	myosin light chain 5	Multiple_Complex
TC0600007060.hg.1	9.84	11.33	-2.81	2.52e-05	0.0003	MYLIP; MIR4639	myosin regulatory light chain interacting protein; microRNA 4639	Multiple_Complex
TC1700010358.hg.1	8.97	6.57	5.28	4.13e-09	1.3e-07	MYO1D	myosin ID	Multiple_Complex
TC1900009548.hg.1	9.89	7.08	7.02	1.65e-12	1.01e-10	MYO1F	myosin IF	Multiple_Complex
TC0700007406.hg.1	4.94	3.87	2.1	0.0001	0.0014	MYO1G	Memczak2013 ANTISENSE, CDS, coding, INTERNAL best transcript NM_033054	NonCoding
TC0700010941.hg.1	12.11	8.75	10.22	3.4e-18	5.65e-16	MYO1G	myosin IG	Multiple_Complex
TC1500009457.hg.1	7.19	5.86	2.5	0.0002	0.002	MYO5A	myosin VA	Multiple_Complex
TC0600008569.hg.1	7.13	5.9	2.35	2.74e-06	4.42e-05	MYO6	myosin VI	Multiple_Complex
TC1900009947.hg.1	11.06	9.93	2.18	0.0003	0.0024	MYO9B	Memczak2013 ANTISENSE, CDS, coding, INTERNAL best transcript NM_004145	NonCoding
TC1100007819.hg.1	5	3.8	2.29	0.0001	0.0014	MYRF	myelin regulatory factor	Multiple_Complex
TC1300006974.hg.1	8.82	10.03	-2.31	1.25e-09	4.46e-08	NAA16	N(alpha)-acetyltransferase 16, NatA auxiliary subunit	Multiple_Complex
TC0300012029.hg.1	13.6	12.49	2.15	4.9e-07	9.56e-06	NAA50	N(alpha)-acetyltransferase 50, NatE catalytic subunit	Multiple_Complex
TC1100011199.hg.1	6.64	7.71	-2.1	5.04e-06	7.58e-05	NAALADL1	N-acetylated alpha-linked acidic dipeptidase-like 1	Multiple_Complex
TC0200010273.hg.1	8.59	6.74	3.62	8.65e-07	1.58e-05	NAB1	NGFI-A binding protein 1	Multiple_Complex
TC0200016582.hg.1	11.33	10.06	2.42	0.0015	0.0107	NABP1	nucleic acid binding protein 1	Multiple_Complex
TC1200007832.hg.1	9.43	8.41	2.02	1.23e-06	2.15e-05	NABP2	nucleic acid binding protein 2	Multiple_Complex
TC1900007125.hg.1	11.25	9.12	4.38	2.5e-13	1.78e-11	NACC1	nucleus accumbens associated 1, BEN and BTB (POZ) domain containing	Multiple_Complex
TC0100012496.hg.1	9.6	8.41	2.28	9.51e-06	0.0001	NADK	NAD kinase	Multiple_Complex
TC0700012182.hg.1	10.3	7.27	8.14	4.54e-12	2.61e-10	NAMPT	nicotinamide phosphoribosyltransferase	Multiple_Complex
TC0X00010278.hg.1	5.27	6.64	-2.6	2.76e-07	5.72e-06	NAP1L3	nucleosome assembly protein 1-like 3	Coding
TC1100009819.hg.1	9.79	10.92	-2.19	1.34e-07	3e-06	NAP1L4	nucleosome assembly protein 1-like 4	Multiple_Complex
TC1300006861.hg.1	3.42	4.72	-2.46	5.07e-07	9.8e-06	NBEA	neurobeachin	Multiple_Complex
TC0200010511.hg.1	6.82	5.23	3.01	0.003	0.0194	NBEAL1	neurobeachin like 1	Multiple_Complex
TC0300007278.hg.1	7.39	5.52	3.67	2.92e-05	0.0004	NBEAL2	neurobeachin like 2	Multiple_Complex
TC0100015561.hg.1	7.42	8.5	-2.11	4.28e-06	6.56e-05	NBPF15	neuroblastoma breakpoint family, member 15	Multiple_Complex
TC0100018285.hg.1	8.28	9.55	-2.41	0.0013	0.0093	NBPF19	neuroblastoma breakpoint family, member 19	Coding
TC0800011305.hg.1	6.55	5.53	2.03	9.76e-05	0.001	NCALD	neurocalcin delta	Multiple_Complex
TC1100009068.hg.1	5.85	4.53	2.5	0.0003	0.0031	NCAM1	neural cell adhesion molecule 1	Multiple_Complex
TC0200008502.hg.1	5.7	4.16	2.9	5.24e-07	1.01e-05	NCAPH	non-SMC condensin I complex subunit H	Multiple_Complex
TC0300010040.hg.1	7.28	8.3	-2.02	7.5e-07	1.4e-05	NCBP2-AS2	NCBP2 antisense RNA 2 (head to head)	Multiple_Complex
TC0200016757.hg.1	5.56	4.28	2.42	5.12e-05	0.0006	NCKAP1	NCK-associated protein 1	Multiple_Complex
TC0300011032.hg.1	8.46	9.72	-2.4	5.22e-09	1.6e-07	NCKIPSD	NCK interacting protein with SH3 domain	Multiple_Complex
TC0800010749.hg.1	10.04	8.62	2.66	2.31e-05	0.0003	NCOA2	nuclear receptor coactivator 2	Multiple_Complex
TC0600009364.hg.1	9.44	8.07	2.59	7.08e-06	0.0001	NCOA7	nuclear receptor coactivator 7	Multiple_Complex
TC1900008882.hg.1	7.25	5.31	3.85	1.19e-07	2.68e-06	NCR1	natural cytotoxicity triggering receptor 1	Multiple_Complex
TC0600011439.hg.1	7.99	5.67	5	3.75e-09	1.19e-07	NCR3	natural cytotoxicity triggering receptor 3	Multiple_Complex
TC1100006966.hg.1	7.8	5.84	3.89	2.27e-07	4.8e-06	NCR3LG1	natural killer cell cytotoxicity receptor 3 ligand 1	Multiple_Complex
TC0900008949.hg.1	10.44	5.12	39.9	1.04e-23	3.9e-21	NCS1	neuronal calcium sensor 1	Multiple_Complex
TC0M00006440.hg.1	10.04	11.05	-2.02	0.0003	0.0027	ND3	NADH dehydrogenase, subunit 3 (complex I)	Multiple_Complex
TC1300007592.hg.1	8.68	4.41	19.24	1.28e-30	1.62e-27	NDFIP2	Nedd4 family interacting protein 2	Multiple_Complex
TC0800011881.hg.1	10.99	9.76	2.35	2.14e-08	5.75e-07	NDRG1	N-myc downstream regulated 1	Multiple_Complex
TC2000009014.hg.1	9.47	10.81	-2.54	5.3e-07	1.02e-05	NDRG3	NDRG family member 3	Multiple_Complex
TC0300009610.hg.1	10.77	12.23	-2.75	5.92e-06	8.66e-05	NDUFB5	NADH dehydrogenase (ubiquinone) 1 beta subcomplex, 5, 16kDa	Multiple_Complex
TC1900009828.hg.1	12.23	11.16	2.11	1.7e-05	0.0002	NDUFB7	NADH dehydrogenase (ubiquinone) 1 beta subcomplex, 7, 18kDa	Multiple_Complex
TC0100010340.hg.1	7.77	9.03	-2.39	3.8e-10	1.51e-08	NDUFS2	NADH dehydrogenase (ubiquinone) Fe-S protein 2, 49kDa (NADH-coenzyme Q reductase)	Multiple_Complex
TC1200006701.hg.1	9.16	10.21	-2.07	1.13e-07	2.56e-06	NECAP1	NECAP endocytosis associated 1	Multiple_Complex
TC1200008544.hg.1	6.05	7.1	-2.07	1.78e-05	0.0002	NEDD1	neural precursor cell expressed, developmentally down-regulated 1	Multiple_Complex
TC1500009508.hg.1	6.37	5.26	2.16	0.0002	0.0016	NEDD4	neural precursor cell expressed, developmentally down-regulated 4, E3 ubiquitin protein ligase	Multiple_Complex
TC0600010810.hg.1	8.94	6.56	5.21	1.03e-11	5.57e-10	NEDD9	neural precursor cell expressed, developmentally down-regulated 9	Multiple_Complex
TC0900008716.hg.1	7.46	5.4	4.18	4.85e-16	5.36e-14	NEK6	NIMA-related kinase 6	Multiple_Complex
TC0100011096.hg.1	8.22	6.53	3.22	5.23e-06	7.81e-05	NEK7	NIMA-related kinase 7	Multiple_Complex
TC1200010490.hg.1	9.47	13.39	-15.13	2.05e-15	2.08e-13	NELL2	neural EGFL like 2	Multiple_Complex
TC1600010181.hg.1	8.55	5.3	9.48	5.05e-14	4.1e-12	NETO2	neuropilin (NRP) and tolloid (TLL)-like 2	Multiple_Complex
TC1600008231.hg.1	11.35	9.17	4.55	2.26e-09	7.64e-08	NFAT5	nuclear factor of activated T-cells 5, tonicity-responsive	Multiple_Complex
TC2000009458.hg.1	12.78	10.66	4.37	1.08e-14	9.96e-13	NFATC2	nuclear factor of activated T-cells, cytoplasmic, calcineurin-dependent 2	Multiple_Complex
TC0700006977.hg.1	9.71	8.47	2.37	5.27e-05	0.0006	NFE2L3	nuclear factor, erythroid 2-like 3	Multiple_Complex
TC0100008517.hg.1	6.31	7.51	-2.3	0.0003	0.0029	NFIA	nuclear factor I/A	Multiple_Complex
TC0900010769.hg.1	11.68	8.16	11.46	4.31e-19	7.96e-17	NFIL3	nuclear factor, interleukin 3 regulated	Coding
TC1900007115.hg.1	6.61	9.14	-5.79	1.2e-13	9.09e-12	NFIX	nuclear factor I/X (CCAAT-binding transcription factor)	Multiple_Complex
TC0400008271.hg.1	9.7	8.21	2.81	1.5e-08	4.19e-07	NFKB1	nuclear factor of kappa light polypeptide gene enhancer in B-cells 1	Multiple_Complex
TC1400008940.hg.1	12.51	11.04	2.76	1.44e-06	2.49e-05	NFKBIA	nuclear factor of kappa light polypeptide gene enhancer in B-cells inhibitor, alpha	Multiple_Complex
TC1900010502.hg.1	8.05	6.54	2.85	5.77e-05	0.0006	NFKBID	nuclear factor of kappa light polypeptide gene enhancer in B-cells inhibitor, delta	Multiple_Complex
TC0X00008002.hg.1	8.03	12.54	-22.81	6.16e-22	1.63e-19	NGFRAP1	nerve growth factor receptor (TNFRSF16) associated protein 1	Multiple_Complex
TC1500010691.hg.1	10.6	9.45	2.22	3.9e-07	7.81e-06	NIPA1	non imprinted in Prader-Willi/Angelman syndrome 1	Multiple_Complex
TC0100007365.hg.1	6.25	7.8	-2.93	4.95e-09	1.52e-07	NIPAL3	NIPA-like domain containing 3	Multiple_Complex
TC1900011251.hg.1	17.25	10.23	129.51	7.29e-39	3.91e-35	NKG7	natural killer cell granule protein 7	Coding
TC1700009566.hg.1	8	9.59	-3	1.71e-05	0.0002	NLRP1	NLR family, pyrin domain containing 1	Multiple_Complex
TC1500010291.hg.1	5.85	4.76	2.13	5.49e-07	1.05e-05	NMB	neuromedin B	Coding
TC1600011317.hg.1	10.4	11.87	-2.77	1.19e-06	2.1e-05	NME4	NME/NM23 nucleoside diphosphate kinase 4	Multiple_Complex
TC1000009880.hg.1	8.92	10.07	-2.21	1.16e-06	2.06e-05	NMT2	N-myristoyltransferase 2	Multiple_Complex
TC0400010784.hg.1	8.32	9.73	-2.66	1.93e-08	5.27e-07	NOA1	nitric oxide associated 1	Multiple_Complex
TC1700008350.hg.1	4.99	8.02	-8.17	3.64e-22	1.05e-19	NOG	noggin	Coding
TC1000008713.hg.1	14.08	13.03	2.07	2.37e-07	4.99e-06	NOLC1	nucleolar and coiled-body phosphoprotein 1	Multiple_Complex
TC1600007001.hg.1	13.19	11.99	2.29	4.04e-06	6.23e-05	NOMO1	NODAL modulator 1	Multiple_Complex
TC1600009608.hg.1	10.61	9.21	2.64	5.88e-08	1.42e-06	NOMO2	NODAL modulator 2	Multiple_Complex
TC1600007026.hg.1	12.34	10.74	3.03	5.23e-08	1.28e-06	NOMO3; NOMO2	NODAL modulator 3; NODAL modulator 2	Multiple_Complex
TC0500012937.hg.1	11.62	9.55	4.2	1.94e-11	9.93e-10	NOP16	NOP16 nucleolar protein	Multiple_Complex
TC0200008627.hg.1	4.24	6.9	-6.33	6.21e-14	4.99e-12	NPAS2	neuronal PAS domain protein 2	Multiple_Complex
TC1100012225.hg.1	10.37	11.93	-2.95	2.44e-09	8.14e-08	NPAT	nuclear protein, ataxia-telangiectasia locus	Multiple_Complex
TC1800008285.hg.1	9.89	8.21	3.21	4.01e-07	8.01e-06	NPC1	Niemann-Pick disease, type C1	Multiple_Complex
TC1400009697.hg.1	6.94	8.53	-3.02	7.08e-07	1.33e-05	NPC2; MIR4709	Niemann-Pick disease, type C2; microRNA 4709	Multiple_Complex
TC1500009984.hg.1	8.9	7.62	2.42	1.89e-05	0.0002	NPTN	neuroplastin	Multiple_Complex
TC1600010732.hg.1	5.66	4.31	2.55	4.75e-05	0.0005	NQO1	NAD(P)H dehydrogenase, quinone 1	Multiple_Complex
TC0300006847.hg.1	7.27	8.47	-2.28	0.0005	0.004	NR1D2	nuclear receptor subfamily 1, group D, member 2	Multiple_Complex
TC0500012340.hg.1	12.65	11.06	3.01	5.46e-12	3.07e-10	NR3C1	nuclear receptor subfamily 3, group C, member 1 (glucocorticoid receptor)	Multiple_Complex
TC0400012078.hg.1	6.58	8.81	-4.69	2.39e-10	9.9e-09	NR3C2	nuclear receptor subfamily 3, group C, member 2	Multiple_Complex
TC1200007653.hg.1	10.44	7.15	9.78	1.2e-12	7.56e-11	NR4A1	nuclear receptor subfamily 4, group A, member 1	Multiple_Complex
TC0200014672.hg.1	10.63	7.47	8.94	8.25e-08	1.92e-06	NR4A2	nuclear receptor subfamily 4, group A, member 2	Multiple_Complex
TC0900008219.hg.1	10.44	4.46	63.33	1.54e-20	3.44e-18	NR4A3	nuclear receptor subfamily 4, group A, member 3	Multiple_Complex
TC0100015352.hg.1	12.77	11.47	2.45	0.0003	0.0025	NRAS	neuroblastoma RAS viral (v-ras) oncogene homolog	Multiple_Complex
TC0700012230.hg.1	7.09	9.46	-5.15	2.72e-18	4.56e-16	NRCAM	neuronal cell adhesion molecule	Multiple_Complex
TC0500011705.hg.1	5.64	8.69	-8.31	3.94e-19	7.35e-17	NREP	neuronal regeneration related protein	Multiple_Complex
TC0600011377.hg.1	9.23	7.99	2.37	2.16e-07	4.61e-06	NRM	nurim (nuclear envelope membrane protein)	Multiple_Complex
TC0600010707.hg.1	4.55	5.87	-2.5	5.07e-05	0.0006	NRN1	neuritin 1	Multiple_Complex
TC2000008123.hg.1	5.89	7.23	-2.54	6.25e-07	1.19e-05	NRSN2-AS1	NRSN2 antisense RNA 1	NonCoding
TC0600009228.hg.1	5.86	7.44	-2.99	0.0006	0.0047	NT5DC1	5-nucleotidase domain containing 1	Multiple_Complex
TC0300011173.hg.1	9.6	6.98	6.12	6.88e-08	1.63e-06	NT5DC2	5-nucleotidase domain containing 2	Multiple_Complex
TC0600008697.hg.1	6.16	7.93	-3.42	1.47e-05	0.0002	NT5E	5-nucleotidase, ecto (CD73)	Multiple_Complex
TC0100017064.hg.1	4.41	6.26	-3.61	3.97e-08	9.96e-07	NUAK2	NUAK family, SNF1-like kinase, 2	Multiple_Complex
TC0700009700.hg.1	10.04	11.19	-2.21	5.49e-05	0.0006	NUB1	negative regulator of ubiquitin-like proteins 1	Multiple_Complex
TC1100012976.hg.1	10.6	13.22	-6.12	9.88e-07	1.78e-05	NUCB2	nucleobindin 2	Multiple_Complex
TC0900007038.hg.1	6.47	7.53	-2.08	0.0002	0.0021	NUDT2	nudix hydrolase 2	Multiple_Complex
TC1100011539.hg.1	7.66	9.49	-3.56	1.89e-07	4.11e-06	NUMA1	nuclear mitotic apparatus protein 1	Multiple_Complex
TC0900011668.hg.1	11.47	10.19	2.42	0.0012	0.0086	NUP188	Memczak2013 ANTISENSE, coding, INTERNAL, UTR3 best transcript NM_015354	NonCoding
TC0300010329.hg.1	10.2	11.6	-2.65	5.22e-06	7.79e-05	NUP210	nucleoporin 210kDa	Multiple_Complex
TC1200012190.hg.1	9.49	7.75	3.34	1e-06	1.8e-05	OASL	2-5-oligoadenylate synthetase-like	Multiple_Complex
TC1900011641.hg.1	15.11	14.11	2.01	1.9e-09	6.59e-08	OAZ1	ornithine decarboxylase antizyme 1	Multiple_Complex
TC1000011736.hg.1	8.91	10.99	-4.22	1.58e-13	1.16e-11	OBFC1	oligonucleotide/oligosaccharide-binding fold containing 1	Multiple_Complex
TC0400010636.hg.1	11.63	13.47	-3.59	4.76e-12	2.72e-10	OCIAD2	OCIA domain containing 2	Multiple_Complex
TC0700006632.hg.1	4.51	6.29	-3.43	6.36e-08	1.52e-06	OCM	oncomodulin	Coding
TC0700011886.hg.1	6.69	7.76	-2.1	6.21e-07	1.18e-05	OCM2	oncomodulin 2	Multiple_Complex
TC0200011720.hg.1	9.09	8.07	2.02	0.0005	0.0041	ODC1; SNORA80B	ornithine decarboxylase 1; small nucleolar RNA, H/ACA box 80B	Multiple_Complex
TC0900008869.hg.1	9.67	8.43	2.35	5.12e-05	0.0006	ODF2	outer dense fiber of sperm tails 2	Multiple_Complex
TC0700007392.hg.1	11.02	9.99	2.05	7.17e-05	0.0008	OGDH	oxoglutarate (alpha-ketoglutarate) dehydrogenase (lipoamide)	Multiple_Complex
TC1900009603.hg.1	5.23	6.74	-2.84	1.12e-07	2.55e-06	OLFM2	olfactomedin 2	Multiple_Complex
TC0100018446.hg.1	6.37	7.73	-2.56	5.17e-06	7.74e-05	OMA1	OMA1 zinc metallopeptidase	Multiple_Complex
TC0100017947.hg.1	4.79	7.12	-5.02	1.65e-09	5.75e-08	OPN3	opsin 3	Multiple_Complex
TC1700010592.hg.1	7.94	9.02	-2.12	0.0007	0.0056	ORMDL3	ORMDL sphingolipid biosynthesis regulator 3	Multiple_Complex
TC2200007069.hg.1	6.11	7.27	-2.24	1.79e-06	3.03e-05	OSBP2	oxysterol binding protein 2	Multiple_Complex
TC0700010504.hg.1	9.45	5.54	15.06	7.02e-19	1.25e-16	OSBPL3	oxysterol binding protein-like 3	Multiple_Complex
TC2000009180.hg.1	9.6	10.65	-2.06	0.0001	0.0011	OSER1	oxidative stress responsive serine-rich 1	Coding
TC2200008427.hg.1	4.96	3.85	2.17	9.49e-08	2.19e-06	OSM	oncostatin M	Coding
TC0900007604.hg.1	10.78	9.77	2.01	1.48e-07	3.25e-06	OSTF1	osteoclast stimulating factor 1	Multiple_Complex
TC0500010599.hg.1	10	8.46	2.9	1.86e-05	0.0002	OXCT1	3-oxoacid CoA-transferase 1	Multiple_Complex
TC0300013795.hg.1	5.48	7.4	-3.77	5.74e-14	4.64e-12	OXNAD1	oxidoreductase NAD-binding domain containing 1	Multiple_Complex
TC1700012337.hg.1	7.54	5.75	3.46	1.27e-05	0.0002	P2RX5	purinergic receptor P2X, ligand gated ion channel, 5	Multiple_Complex
TC1700012338.hg.1	7.17	6.09	2.12	0.0002	0.002	P2RX5-TAX1BP3	P2RX5-TAX1BP3 readthrough (NMD candidate)	Multiple_Complex
TC0300012813.hg.1	7.14	5.43	3.26	2.72e-05	0.0003	P2RY14	purinergic receptor P2Y, G-protein coupled, 14	Coding
TC1700012073.hg.1	11.09	9.78	2.48	3.93e-08	9.88e-07	P4HB	prolyl 4-hydroxylase, beta polypeptide	Multiple_Complex
TC0800012444.hg.1	10.18	12.82	-6.21	5.92e-10	2.26e-08	PABPC1; MIR7705	poly(A) binding protein, cytoplasmic 1; microRNA 7705	Multiple_Complex
TC1300006633.hg.1	9.94	11.03	-2.13	8.72e-10	3.21e-08	PABPC3	poly(A) binding protein, cytoplasmic 3	Coding
TC1100008054.hg.1	10.47	11.96	-2.81	8.32e-09	2.43e-07	PACS1	phosphofurin acidic cluster sorting protein 1	Multiple_Complex
TC0600006926.hg.1	9.15	8.08	2.11	2.53e-05	0.0003	PAK1IP1	PAK1 interacting protein 1	Multiple_Complex
TC0500008229.hg.1	9.97	8.33	3.12	1.54e-08	4.3e-07	PAM	peptidylglycine alpha-amidating monooxygenase	Multiple_Complex
TC1200012802.hg.1	6.76	8.21	-2.73	1.1e-05	0.0001	PAN2; CNPY2	PAN2 poly(A) specific ribonuclease subunit; canopy FGF signaling regulator 2	Multiple_Complex
TC0100006729.hg.1	16.72	15.36	2.55	5.55e-10	2.13e-08	PARK7	parkinson protein 7	Multiple_Complex
TC1500010877.hg.1	4.79	6	-2.32	6.65e-06	9.62e-05	PARP16	poly(ADP-ribose) polymerase family member 16	Multiple_Complex
TC0300012191.hg.1	12.6	13.69	-2.13	1.89e-05	0.0002	PARP9	poly(ADP-ribose) polymerase family member 9	Multiple_Complex
TC2200007574.hg.1	6.57	5.45	2.17	5.69e-05	0.0006	PARVB	parvin, beta	Multiple_Complex
TC2200007576.hg.1	9.21	10.22	-2.01	0.0001	0.0012	PARVG	parvin, gamma	Multiple_Complex
TC2200008477.hg.1	9.15	11.31	-4.45	1.35e-14	1.22e-12	PATZ1	POZ (BTB) and AT hook containing zinc finger 1	Multiple_Complex
TC0900008763.hg.1	7.15	8.45	-2.46	8.39e-06	0.0001	PBX3	pre-B-cell leukemia homeobox 3	Multiple_Complex
TC1900010067.hg.1	10.3	7.99	4.96	1.54e-10	6.61e-09	PBX4	pre-B-cell leukemia homeobox 4	Multiple_Complex
TC1000010930.hg.1	9.16	7.55	3.05	1.46e-10	6.34e-09	PCBD1	pterin-4 alpha-carbinolamine dehydratase/dimerization cofactor of hepatocyte nuclear factor 1 alpha	Multiple_Complex
TC0300013988.hg.1	8.3	6.84	2.76	6.91e-06	9.95e-05	PCBP4	poly(rC) binding protein 4	Multiple_Complex
TC0800010417.hg.1	9.01	10.08	-2.1	0.0032	0.0204	PCMTD1	protein-L-isoaspartate (D-aspartate) O-methyltransferase domain containing 1	Multiple_Complex
TC2000009956.hg.1	7.59	10.01	-5.34	1.2e-11	6.4e-10	PCMTD2	protein-L-isoaspartate (D-aspartate) O-methyltransferase domain containing 2	Multiple_Complex
TC0900007618.hg.1	4.39	7.12	-6.62	1.09e-15	1.15e-13	PCSK5	proprotein convertase subtilisin/kexin type 5	Multiple_Complex
TC1700008342.hg.1	8.31	6.68	3.1	8.56e-05	0.0009	PCTP	phosphatidylcholine transfer protein	Multiple_Complex
TC0500009061.hg.1	8.28	10.16	-3.68	1.04e-10	4.6e-09	PCYOX1L	prenylcysteine oxidase 1 like	Multiple_Complex
TC1900011708.hg.1	10.94	12.07	-2.18	2.95e-06	4.71e-05	PDCD2L	programmed cell death 2-like	Multiple_Complex
TC1000008904.hg.1	9.16	11.1	-3.83	1.23e-10	5.4e-09	PDCD4; MIR4680	programmed cell death 4 (neoplastic transformation inhibitor); microRNA 4680	Multiple_Complex
TC1100006923.hg.1	8.72	12.32	-12.16	2.7e-18	4.55e-16	PDE3B	phosphodiesterase 3B, cGMP-inhibited	Multiple_Complex
TC1100006925.hg.1	6.17	8.73	-5.89	1.46e-07	3.21e-06	PDE3B	phosphodiesterase 3B, cGMP-inhibited	NonCoding
TC1900006985.hg.1	6.93	5.19	3.33	1.03e-09	3.75e-08	PDE4A	phosphodiesterase 4A, cAMP-specific	Multiple_Complex
TC0100008625.hg.1	11.91	9.45	5.52	3.34e-12	1.96e-10	PDE4B	phosphodiesterase 4B, cAMP-specific	Multiple_Complex
TC0800010667.hg.1	6.07	7.38	-2.49	0.0003	0.003	PDE7A	phosphodiesterase 7A	Multiple_Complex
TC2100007263.hg.1	4.45	8.01	-11.79	9.99e-13	6.44e-11	PDE9A	phosphodiesterase 9A	Multiple_Complex
TC0700009977.hg.1	5.79	3.74	4.12	2.18e-11	1.1e-09	PDGFA	platelet-derived growth factor alpha polypeptide	Multiple_Complex
TC1500007072.hg.1	9.71	8.61	2.14	0.0002	0.0021	PDIA3	protein disulfide isomerase family A member 3	Multiple_Complex
TC0700012968.hg.1	10.23	9.07	2.24	8.71e-07	1.59e-05	PDIA4	protein disulfide isomerase family A, member 4	Multiple_Complex
TC0200011731.hg.1	12.42	9.87	5.86	8.01e-16	8.58e-14	PDIA6	protein disulfide isomerase family A, member 6	Multiple_Complex
TC0200009978.hg.1	8.37	10.47	-4.29	8.45e-09	2.46e-07	PDK1	pyruvate dehydrogenase kinase, isozyme 1	Multiple_Complex
TC1000011485.hg.1	6.74	5.33	2.67	1.06e-05	0.0001	PDLIM1	PDZ and LIM domain 1	Multiple_Complex
TC0X00009964.hg.1	9.81	8.66	2.22	2.84e-06	4.56e-05	PDZD11	PDZ domain containing 11	Multiple_Complex
TC0100010284.hg.1	12.08	10.35	3.33	3.23e-17	4.45e-15	PEA15	phosphoprotein enriched in astrocytes 15	Multiple_Complex
TC1700011442.hg.1	7.49	10.82	-10.03	8.31e-13	5.47e-11	PECAM1	platelet/endothelial cell adhesion molecule 1	Multiple_Complex
TC1700012353.hg.1	6.21	7.48	-2.41	3.12e-05	0.0004	PER1; MIR6883	period circadian clock 1; microRNA 6883	Multiple_Complex
TC0600013326.hg.1	8.54	6.18	5.13	8.01e-14	6.25e-12	PERP	PERP, TP53 apoptosis effector	Coding
TC0600011852.hg.1	5.35	6.4	-2.06	0.0001	0.0012	PEX6	peroxisomal biogenesis factor 6	Multiple_Complex
TC0300013970.hg.1	9.04	10.59	-2.93	5.31e-06	7.9e-05	PFKFB4; MIR6823	6-phosphofructo-2-kinase/fructose-2,6-biphosphatase 4; microRNA 6823	Multiple_Complex
TC1700009539.hg.1	16.31	15.27	2.06	5.8e-07	1.11e-05	PFN1	profilin 1	Multiple_Complex
TC1000008574.hg.1	15.23	13.86	2.57	6.51e-10	2.45e-08	PGAM1	phosphoglycerate mutase 1 (brain)	Multiple_Complex
TC0600014188.hg.1	9.42	7.65	3.41	1.02e-07	2.32e-06	PHACTR2	phosphatase and actin regulator 2	Multiple_Complex
TC1700011045.hg.1	15.75	14.65	2.14	4.76e-06	7.2e-05	PHB	prohibitin	Multiple_Complex
TC0300013090.hg.1	12.85	14.03	-2.27	2.31e-07	4.87e-06	PHC3	polyhomeotic homolog 3 (Drosophila)	Multiple_Complex
TC0900011388.hg.1	8.58	9.96	-2.6	5.74e-08	1.39e-06	PHF19	PHD finger protein 19	Multiple_Complex
TC0600014143.hg.1	10.54	12.03	-2.81	0.0007	0.0055	PHF3	PHD finger protein 3	Multiple_Complex
TC0100009621.hg.1	5.3	6.45	-2.21	3.84e-08	9.65e-07	PHGDH	phosphoglycerate dehydrogenase	Multiple_Complex
TC1200011310.hg.1	10.87	7.96	7.5	1.88e-22	5.84e-20	PHLDA1	pleckstrin homology-like domain, family A, member 1	Multiple_Complex
TC1100009212.hg.1	6.51	5.26	2.38	4.74e-07	9.29e-06	PHLDB1; MIR6716	pleckstrin homology-like domain, family B, member 1; microRNA 6716	Multiple_Complex
TC0300008324.hg.1	7.07	5.25	3.54	1.98e-07	4.26e-06	PHLDB2; PLCXD2	pleckstrin homology-like domain, family B, member 2; phosphatidylinositol-specific phospholipase C, X domain containing 2	Multiple_Complex
TC1800009277.hg.1	9.51	10.54	-2.04	0.0002	0.002	PIAS2	protein inhibitor of activated STAT 2	Multiple_Complex
TC1100011838.hg.1	12.54	10.88	3.16	7.45e-18	1.15e-15	PICALM	phosphatidylinositol binding clathrin assembly protein	Multiple_Complex
TC1600011228.hg.1	8.83	7.12	3.27	7.9e-09	2.33e-07	PIEZO1	piezo-type mechanosensitive ion channel component 1	Multiple_Complex
TC0100007481.hg.1	7.38	6.24	2.19	2.9e-05	0.0003	PIGV	phosphatidylinositol glycan anchor biosynthesis class V	Multiple_Complex
TC1000011524.hg.1	10.46	7.58	7.37	4.63e-19	8.49e-17	PIK3AP1	phosphoinositide-3-kinase adaptor protein 1	Multiple_Complex
TC0100006787.hg.1	11.94	13.17	-2.34	2.02e-05	0.0003	PIK3CD	phosphatidylinositol-4,5-bisphosphate 3-kinase, catalytic subunit delta	Multiple_Complex
TC2200008475.hg.1	11.98	15	-8.11	2.89e-20	6.14e-18	PIK3IP1	phosphoinositide-3-kinase interacting protein 1	Multiple_Complex
TC0500007641.hg.1	11.45	10.41	2.06	0.0023	0.0157	PIK3R1	phosphoinositide-3-kinase, regulatory subunit 1 (alpha)	Multiple_Complex
TC0100014040.hg.1	5.26	4.06	2.3	7.22e-07	1.35e-05	PIK3R3	phosphoinositide-3-kinase, regulatory subunit 3 (gamma)	Multiple_Complex
TC1700009707.hg.1	6.41	4.29	4.34	6.01e-10	2.29e-08	PIK3R6	phosphoinositide-3-kinase, regulatory subunit 6	Multiple_Complex
TC0600007862.hg.1	10.71	9.35	2.55	7.3e-05	0.0008	PIM1	Pim-1 proto-oncogene, serine/threonine kinase	Multiple_Complex
TC1700008690.hg.1	10.42	11.87	-2.74	7.25e-09	2.15e-07	PITPNC1	phosphatidylinositol transfer protein, cytoplasmic 1	Multiple_Complex
TC1000009589.hg.1	10.91	9.34	2.98	2.4e-08	6.39e-07	PITRM1	pitrilysin metallopeptidase 1	Multiple_Complex
TC0800008028.hg.1	7.5	9.54	-4.1	8.47e-07	1.55e-05	PKIA	protein kinase (cAMP-dependent, catalytic) inhibitor alpha	Multiple_Complex
TC2000007457.hg.1	5.04	6.54	-2.82	3.16e-08	8.18e-07	PKIG	protein kinase (cAMP-dependent, catalytic) inhibitor gamma	Multiple_Complex
TC1100011126.hg.1	7.2	5.38	3.53	4.73e-08	1.16e-06	PLA2G16	phospholipase A2, group XVI	Multiple_Complex
TC0400011192.hg.1	13.12	16.79	-12.76	1.52e-29	1.55e-26	PLAC8	placenta specific 8	Multiple_Complex
TC0800010506.hg.1	5.51	9.6	-16.97	9.38e-15	8.82e-13	PLAG1	pleiomorphic adenoma gene 1	Multiple_Complex
TC2000008845.hg.1	11.51	9.39	4.35	1.71e-15	1.75e-13	PLAGL2	pleiomorphic adenoma gene-like 2	Coding
TC2000009887.hg.1	7.53	5.05	5.58	9.79e-09	2.82e-07	PLCB1	phospholipase C, beta 1 (phosphoinositide-specific)	Multiple_Complex
TC2000007386.hg.1	6.66	7.9	-2.35	2.21e-05	0.0003	PLCG1; RPL23AP81	phospholipase C, gamma 1; ribosomal protein L23a pseudogene 81	Multiple_Complex
TC1600008607.hg.1	6.37	4.33	4.12	4.34e-05	0.0005	PLCG2	phospholipase C, gamma 2 (phosphatidylinositol-specific)	Multiple_Complex
TC0300006758.hg.1	8.21	9.27	-2.09	2.72e-06	4.4e-05	PLCL2; MIR3714	phospholipase C-like 2; microRNA 3714	Multiple_Complex
TC0200007895.hg.1	9.51	5.32	18.21	3.9e-22	1.09e-19	PLEK	pleckstrin	Multiple_Complex
TC1200007010.hg.1	6.84	4.28	5.92	1.3e-12	8.23e-11	PLEKHA5	pleckstrin homology domain containing, family A member 5	Multiple_Complex
TC1100008392.hg.1	9.39	10.77	-2.59	4.58e-10	1.8e-08	PLEKHB1	pleckstrin homology domain containing, family B (evectins) member 1	Multiple_Complex
TC1900007679.hg.1	7.79	9.18	-2.62	0.0003	0.0029	PLEKHF1	pleckstrin homology domain containing, family F (with FYVE domain) member 1	Coding
TC0600009843.hg.1	6.74	4.27	5.51	5.35e-17	7.12e-15	PLEKHG1	pleckstrin homology domain containing, family G (with RhoGef domain) member 1	Multiple_Complex
TC1900008058.hg.1	7.41	6.3	2.15	3.5e-05	0.0004	PLEKHG2	pleckstrin homology domain containing, family G (with RhoGef domain) member 2	Multiple_Complex
TC0800010158.hg.1	9.65	8.47	2.26	4.41e-11	2.12e-09	PLPP5	phospholipid phosphatase 5	Multiple_Complex
TC0900006526.hg.1	5.14	6.28	-2.2	1.42e-05	0.0002	PLPP6	phospholipid phosphatase 6	Coding
TC1700010560.hg.1	4.87	6.27	-2.64	0.0001	0.0014	PLXDC1	plexin domain containing 1	Multiple_Complex
TC0X00008836.hg.1	7.55	6.2	2.56	7.36e-08	1.74e-06	PLXNA3	plexin A3	Multiple_Complex
TC2200009152.hg.1	4.87	7.33	-5.49	6.24e-14	4.99e-12	PLXNB2	plexin B2	Multiple_Complex
TC0300012397.hg.1	6.22	4.74	2.78	0.004	0.0246	PLXND1	plexin D1	Multiple_Complex
TC1800007471.hg.1	7.63	5.05	5.95	2.05e-10	8.61e-09	PMAIP1	phorbol-12-myristate-13-acetate-induced protein 1	Multiple_Complex
TC2000009604.hg.1	11.36	9.72	3.13	0.0008	0.006	PMEPA1	prostate transmembrane protein, androgen induced 1	Multiple_Complex
TC1700009850.hg.1	6.16	5.06	2.14	0.0005	0.004	PMP22	peripheral myelin protein 22	Multiple_Complex
TC0200007886.hg.1	7.86	6.56	2.46	0.0002	0.0023	PNO1	partner of NOB1 homolog	Multiple_Complex
TC0X00009018.hg.1	6.62	8.04	-2.68	5.25e-08	1.28e-06	PNPLA4	patatin-like phospholipase domain containing 4	Coding
TC1900011654.hg.1	8.83	7.77	2.09	0.0005	0.0042	PNPLA6	patatin-like phospholipase domain containing 6	Multiple_Complex
TC0100015788.hg.1	5.15	3.96	2.29	0.0002	0.0018	POGZ	Transcript Identified by AceView, Entrez Gene ID(s) 23126	Unassigned
TC1800007354.hg.1	6.18	7.39	-2.31	0.0002	0.0017	POLI	polymerase (DNA directed) iota	Multiple_Complex
TC1100009707.hg.1	11.64	10.62	2.02	0.001	0.0073	POLR2L	polymerase (RNA) II (DNA directed) polypeptide L, 7.6kDa	Coding
TC0100014048.hg.1	8.85	7.73	2.16	6.77e-07	1.28e-05	POMGNT1	protein O-linked mannose N-acetylglucosaminyltransferase 1 (beta 1,2-)	Multiple_Complex
TC0500009072.hg.1	5.12	6.63	-2.86	2.04e-11	1.04e-09	PPARGC1B	peroxisome proliferator-activated receptor gamma, coactivator 1 beta	Multiple_Complex
TC0400011013.hg.1	6.81	8	-2.29	0.002	0.0138	PPBP	pro-platelet basic protein	Coding
TC1100006760.hg.1	4.33	6.37	-4.13	9.31e-11	4.2e-09	PPFIBP2	PTPRF interacting protein, binding protein 2 (liprin beta 2)	Multiple_Complex
TC0100015558.hg.1	6.88	8.07	-2.28	6.55e-05	0.0007	PPIAL4E	peptidylprolyl isomerase A (cyclophilin A)-like 4E	Coding
TC0100015577.hg.1	7.09	8.2	-2.16	0.0007	0.0057	PPIAL4F; PPIAL4D	peptidylprolyl isomerase A (cyclophilin A)-like 4F; peptidylprolyl isomerase A (cyclophilin A)-like 4D	Coding
TC1100011157.hg.1	13.5	11.97	2.88	0.0001	0.0014	PPP1R14B	protein phosphatase 1, regulatory (inhibitor) subunit 14B	Multiple_Complex
TC2000007336.hg.1	10.23	8.34	3.71	3.11e-09	1.01e-07	PPP1R16B	protein phosphatase 1, regulatory subunit 16B	Multiple_Complex
TC0600011376.hg.1	12.49	11.39	2.14	0.0002	0.0016	PPP1R18	protein phosphatase 1, regulatory subunit 18	Multiple_Complex
TC1400010717.hg.1	6.65	8.78	-4.39	1.34e-12	8.45e-11	PPP1R3E	protein phosphatase 1, regulatory subunit 3E	Multiple_Complex
TC0500013384.hg.1	7.9	5.65	4.77	1.27e-13	9.59e-12	PPP2R2B	protein phosphatase 2, regulatory subunit B, beta	Multiple_Complex
TC1800008035.hg.1	7.46	6.36	2.13	0.0046	0.0273	PPP4R1	protein phosphatase 4, regulatory subunit 1	Multiple_Complex
TC1500010463.hg.1	5.97	4.64	2.52	0.0034	0.0211	PRC1	protein regulator of cytokinesis 1	Multiple_Complex
TC0600008972.hg.1	14.74	7.07	203.43	1.58e-42	3.4e-38	PRDM1	PR domain containing 1, with ZNF domain	Multiple_Complex
TC0100006937.hg.1	11.18	12.82	-3.13	3.23e-09	1.04e-07	PRDM2	PR domain containing 2, with ZNF domain	Multiple_Complex
TC0100014014.hg.1	13.5	11.57	3.8	8.01e-12	4.42e-10	PRDX1	peroxiredoxin 1	Multiple_Complex
TC0X00006794.hg.1	9.81	8.61	2.29	5.98e-09	1.8e-07	PRDX4	peroxiredoxin 4	Multiple_Complex
TC2000009357.hg.1	12.87	11.52	2.55	1.02e-05	0.0001	PREX1	phosphatidylinositol-3,4,5-trisphosphate-dependent Rac exchange factor 1	Multiple_Complex
TC1000010925.hg.1	13.66	6.21	175.61	4.56e-35	1.4e-31	PRF1	perforin 1 (pore forming protein)	Multiple_Complex
TC1200012804.hg.1	4.46	5.69	-2.35	3.52e-06	5.5e-05	PRIM1	primase, DNA, polypeptide 1 (49kDa)	Multiple_Complex
TC0100008874.hg.1	9.57	10.86	-2.44	6.56e-05	0.0007	PRKACB	protein kinase, cAMP-dependent, catalytic, beta	Multiple_Complex
TC1700008661.hg.1	5.73	7.78	-4.13	6.58e-12	3.68e-10	PRKCA	protein kinase C, alpha	Multiple_Complex
TC1700008668.hg.1	5.44	6.96	-2.87	8.32e-05	0.0009	PRKCA	Jeck2013 ALT_ACCEPTOR, ALT_DONOR, coding, INTERNAL, intronic best transcript NM_002737	NonCoding
TC0300007512.hg.1	7.34	6.2	2.21	2.81e-06	4.53e-05	PRKCD	protein kinase C, delta	Multiple_Complex
TC1900007031.hg.1	10.84	12	-2.24	1.05e-05	0.0001	PRKCSH	protein kinase C substrate 80K-H	Multiple_Complex
TC0800010360.hg.1	8.72	7.56	2.24	0.0026	0.0174	PRKDC	protein kinase, DNA-activated, catalytic polypeptide	Multiple_Complex
TC0X00008945.hg.1	10.07	8.34	3.3	7.29e-09	2.16e-07	PRKX	protein kinase, X-linked	Multiple_Complex
TC2100007474.hg.1	10.82	12.65	-3.55	8.22e-13	5.42e-11	PRMT2	protein arginine methyltransferase 2	Multiple_Complex
TC2000006576.hg.1	11.9	10.36	2.92	3.16e-11	1.56e-09	PRNP	prion protein	Multiple_Complex
TC0300011517.hg.1	7.1	5.72	2.59	0.0045	0.027	PROK2	prokineticin 2	Coding
TC1100007301.hg.1	8.44	4.8	12.4	1.48e-16	1.78e-14	PRR5L	proline rich 5 like	Multiple_Complex
TC0600014268.hg.1	3.83	4.95	-2.17	3.72e-09	1.18e-07	PRRT1	proline-rich transmembrane protein 1	Multiple_Complex
TC0600014269.hg.1	5.25	6.35	-2.14	1.82e-08	5.01e-07	PRRT1	proline-rich transmembrane protein 1	Multiple_Complex
TC0100009935.hg.1	6.37	7.56	-2.27	8.87e-11	4.04e-09	PRUNE	prune exopolyphosphatase	Multiple_Complex
TC0900007667.hg.1	8.55	6.77	3.43	4.49e-12	2.6e-10	PSAT1	phosphoserine aminotransferase 1	Multiple_Complex
TC0100013696.hg.1	12.34	11.08	2.38	1.26e-09	4.49e-08	PSMB2	proteasome subunit beta 2	Multiple_Complex
TC1900008084.hg.1	9.79	8.6	2.29	6.21e-06	9.05e-05	PSMC4	proteasome 26S subunit, ATPase 4	Multiple_Complex
TC1700007519.hg.1	10.1	8.76	2.53	4.22e-09	1.33e-07	PSMD11	proteasome 26S subunit, non-ATPase 11	Multiple_Complex
TC1700011523.hg.1	9.71	8.66	2.08	0.0005	0.0044	PSMD12	proteasome 26S subunit, non-ATPase 12	Multiple_Complex
TC1100006441.hg.1	11.84	10.7	2.2	3.27e-08	8.39e-07	PSMD13	proteasome 26S subunit, non-ATPase 13	Multiple_Complex
TC0200009813.hg.1	10.83	8.8	4.07	5.37e-10	2.07e-08	PSMD14	proteasome 26S subunit, non-ATPase 14	Multiple_Complex
TC0300009701.hg.1	8.82	7.55	2.42	1.01e-05	0.0001	PSMD2	proteasome 26S subunit, non-ATPase 2	Multiple_Complex
TC1900008013.hg.1	14.44	13.4	2.06	2.86e-06	4.57e-05	PSMD8	proteasome 26S subunit, non-ATPase 8	Multiple_Complex
TC1200009852.hg.1	5.73	4.5	2.34	0.0004	0.0037	PZP	pregnancy-zone protein	Multiple_Complex
TC0800008295.hg.1	10.1	11.77	-3.18	9.02e-11	4.09e-09	PTDSS1	phosphatidylserine synthase 1	Multiple_Complex
TC1400007161.hg.1	6.07	4.34	3.31	1.56e-05	0.0002	PTGDR	prostaglandin D2 receptor (DP)	Coding
TC1100011008.hg.1	6.58	5.53	2.06	3.83e-07	7.69e-06	PTGDR2	prostaglandin D2 receptor 2	Multiple_Complex
TC1400007165.hg.1	10.45	7.31	8.8	4.71e-14	3.85e-12	PTGER2	prostaglandin E receptor 2	Coding
TC1400010624.hg.1	5.55	6.86	-2.48	3.54e-05	0.0004	PTGR2	prostaglandin reductase 2	Multiple_Complex
TC1200006643.hg.1	9.13	5.88	9.54	2.75e-20	5.89e-18	PTMS	parathymosin	Multiple_Complex
TC0100015333.hg.1	11.01	8.76	4.77	3.21e-14	2.7e-12	PTPN22	protein tyrosine phosphatase, non-receptor type 22 (lymphoid)	Multiple_Complex
TC0100016945.hg.1	8.14	6.89	2.39	2.79e-08	7.31e-07	PTPN7	protein tyrosine phosphatase, non-receptor type 7	Multiple_Complex
TC1500010893.hg.1	5.64	4.55	2.13	0.0003	0.0029	PTPN9	protein tyrosine phosphatase, non-receptor type 9	Multiple_Complex
TC1100007507.hg.1	8.18	7	2.26	0.002	0.0139	PTPRJ	protein tyrosine phosphatase, receptor type, J	Multiple_Complex
TC0600013126.hg.1	3.84	6.61	-6.83	3.95e-16	4.49e-14	PTPRK	protein tyrosine phosphatase, receptor type, K	Multiple_Complex
TC1800006589.hg.1	8.76	4.54	18.67	4.29e-11	2.07e-09	PTPRM	protein tyrosine phosphatase, receptor type, M	Multiple_Complex
TC0200011990.hg.1	8.37	9.91	-2.89	1.08e-07	2.45e-06	PTRHD1	peptidyl-tRNA hydrolase domain containing 1	Multiple_Complex
TC0500009281.hg.1	8.38	6.6	3.45	2.26e-08	6.04e-07	PTTG1	pituitary tumor-transforming 1	Multiple_Complex
TC0900009404.hg.1	11.15	9.78	2.58	0.0008	0.0063	PUM3	pumilio RNA binding family member 3	Multiple_Complex
TC0700013426.hg.1	9.63	11.57	-3.85	7.6e-17	9.64e-15	PVRIG	poliovirus receptor related immunoglobulin domain containing	Multiple_Complex
TC1100012535.hg.1	7.17	5.11	4.15	2.19e-06	3.63e-05	PVRL1	poliovirus receptor-related 1 (herpesvirus entry mediator C)	Multiple_Complex
TC0300008316.hg.1	8.28	7.19	2.13	8e-05	0.0008	PVRL3	poliovirus receptor-related 3	Multiple_Complex
TC1700012484.hg.1	6.05	4.94	2.17	1.2e-08	3.42e-07	PYCR1	pyrroline-5-carboxylate reductase 1	Multiple_Complex
TC0100010243.hg.1	11.38	8.82	5.93	3.52e-11	1.72e-09	PYHIN1	pyrin and HIN domain family, member 1	Multiple_Complex
TC1200007051.hg.1	8.51	7.39	2.18	0.0056	0.0321	PYROXD1	pyridine nucleotide-disulphide oxidoreductase domain 1	Multiple_Complex
TC1900009116.hg.1	6.75	8.34	-3	8.67e-09	2.51e-07	R3HDM4	R3H domain containing 4	Multiple_Complex
TC0800010138.hg.1	8.53	5.96	5.97	2.54e-16	2.95e-14	RAB11FIP1	RAB11 family interacting protein 1 (class I)	Multiple_Complex
TC0100015895.hg.1	6.17	8.79	-6.14	1.61e-13	1.18e-11	RAB13	RAB13, member RAS oncogene family	Multiple_Complex
TC1400009422.hg.1	6.36	7.47	-2.16	0.0004	0.0037	RAB15	RAB15, member RAS oncogene family	Multiple_Complex
TC1300009797.hg.1	4.32	5.39	-2.1	6.06e-07	1.16e-05	RAB20	RAB20, member RAS oncogene family	Multiple_Complex
TC1500010866.hg.1	9.11	7.81	2.47	5.14e-10	1.99e-08	RAB27A	RAB27A, member RAS oncogene family	Multiple_Complex
TC1800007360.hg.1	6.14	4.87	2.41	1.82e-05	0.0002	RAB27B	RAB27B, member RAS oncogene family	Multiple_Complex
TC0X00008401.hg.1	8.48	10.04	-2.95	4.67e-07	9.16e-06	RAB33A	RAB33A, member RAS oncogene family	Coding
TC0X00011236.hg.1	6.16	7.26	-2.15	0.0094	0.0488	RAB39B	Transcript Identified by AceView, Entrez Gene ID(s) 116442	Unassigned
TC0300014042.hg.1	7.88	10.15	-4.81	1.01e-13	7.71e-12	RAB43	RAB43, member RAS oncogene family	Coding
TC1500007518.hg.1	10.76	9.32	2.69	9.52e-06	0.0001	RAB8B	RAB8B, member RAS oncogene family	Multiple_Complex
TC0X00006656.hg.1	7.13	5.86	2.41	3.33e-08	8.5e-07	RAB9A	RAB9A, member RAS oncogene family	Multiple_Complex
TC1400007511.hg.1	7.37	8.74	-2.58	8.02e-06	0.0001	RAD51B	RAD51 paralog B	Multiple_Complex
TC0800011137.hg.1	4.17	5.35	-2.26	9.03e-05	0.0009	RAD54B; FSBP	RAD54 homolog B (S. cerevisiae); fibrinogen silencer binding protein	Multiple_Complex
TC0X00009179.hg.1	4.44	5.53	-2.13	1.94e-09	6.68e-08	RAI2	retinoic acid induced 2	Multiple_Complex
TC0100010755.hg.1	4.25	5.53	-2.43	1.52e-06	2.61e-05	RALGPS2	Ral GEF with PH domain and SH3 binding motif 2	Multiple_Complex
TC2200006641.hg.1	9.77	8.27	2.83	4.48e-10	1.77e-08	RANBP1	RAN binding protein 1	Multiple_Complex
TC0900011778.hg.1	9.96	8.69	2.41	0.0004	0.0038	RAPGEF1	Rap guanine nucleotide exchange factor 1	Multiple_Complex
TC0500013350.hg.1	5.44	6.83	-2.61	0.0008	0.0059	RAPGEF6	Rap guanine nucleotide exchange factor 6	Multiple_Complex
TC1100007899.hg.1	13.96	15.2	-2.36	1.48e-09	5.21e-08	RARRES3	retinoic acid receptor responder (tazarotene induced) 3	Multiple_Complex
TC1300009933.hg.1	9.95	11.31	-2.58	5.67e-09	1.72e-07	RASA3	RAS p21 protein activator 3	Multiple_Complex
TSUnmapped00000531.hg.1	9.71	11.04	-2.51	8.07e-08	1.89e-06	RASA3	RAS p21 protein activator 3	Coding
TC0700013601.hg.1	5.62	7.67	-4.15	3.35e-12	1.96e-10	RASA4B; RASA4	RAS p21 protein activator 4B; RAS p21 protein activator 4	Multiple_Complex
TC1000010432.hg.1	7.18	5.79	2.62	9.04e-08	2.09e-06	RASGEF1A	RasGEF domain family member 1A	Multiple_Complex
TC0500007925.hg.1	6.67	9.15	-5.58	2.9e-10	1.18e-08	RASGRF2	Ras protein-specific guanine nucleotide-releasing factor 2	Multiple_Complex
TC1100011180.hg.1	4.87	7.4	-5.78	2.36e-14	2.06e-12	RASGRP2	RAS guanyl releasing protein 2 (calcium and DAG-regulated)	Multiple_Complex
TC1200008005.hg.1	7.11	8.21	-2.14	1.96e-08	5.32e-07	RASSF3	Ras association (RalGDS/AF-6) domain family member 3	Multiple_Complex
TC0100008607.hg.1	6.41	4.95	2.76	1.92e-05	0.0002	RAVER2	ribonucleoprotein, PTB-binding 2	Multiple_Complex
TC1800009221.hg.1	7.25	5.35	3.73	1.44e-06	2.49e-05	RBBP8; MIR4741	retinoblastoma binding protein 8; microRNA 4741	Multiple_Complex
TC1600007887.hg.1	7.56	9.39	-3.54	6.28e-09	1.89e-07	RBL2	retinoblastoma-like 2	Multiple_Complex
TC2100006585.hg.1	5.6	8.26	-6.35	4.4e-17	5.94e-15	RBM11	RNA binding motif protein 11	Multiple_Complex
TC0800011116.hg.1	4.14	5.21	-2.09	0.0013	0.0095	RBM12B	RNA binding motif protein 12B	Multiple_Complex
TC1400008683.hg.1	9.15	11	-3.6	0.0005	0.0039	RBM23	RNA binding motif protein 23	Multiple_Complex
TC1300009332.hg.1	5.37	6.72	-2.55	2.41e-05	0.0003	RBM26	Transcript Identified by AceView, Entrez Gene ID(s) 64062	Unassigned
TC2000007859.hg.1	6.32	7.34	-2.03	5.58e-06	8.24e-05	RBM38	RNA binding motif protein 38	Multiple_Complex
TC0X00010462.hg.1	7.05	8.21	-2.24	0.0018	0.0125	RBM41	RNA binding motif protein 41	Multiple_Complex
TC0700008328.hg.1	7.04	8.25	-2.31	0.0019	0.0131	RBM48	RNA binding motif protein 48	Coding
TC0600011945.hg.1	8.62	4.76	14.49	9.76e-13	6.31e-11	RCAN2	regulator of calcineurin 2	Coding
TC0100007370.hg.1	8.21	11.22	-8.1	2.91e-11	1.46e-09	RCAN3	RCAN family member 3	Multiple_Complex
TC1300008894.hg.1	5.47	4.24	2.33	4.82e-06	7.28e-05	RCBTB2	regulator of chromosome condensation (RCC1) and BTB (POZ) domain containing protein 2	Multiple_Complex
TC0800007957.hg.1	7.83	4.47	10.26	4.22e-18	6.86e-16	RDH10	retinol dehydrogenase 10 (all-trans)	Multiple_Complex
TC1100012262.hg.1	7.45	6.18	2.41	3.79e-05	0.0004	RDX	radixin	Multiple_Complex
TC0200016452.hg.1	13.62	11.01	6.09	3.33e-15	3.3e-13	REL	v-rel avian reticuloendotheliosis viral oncogene homolog	Multiple_Complex
TC0100011012.hg.1	11.43	6.89	23.32	1.12e-15	1.18e-13	RGS1	regulator of G-protein signaling 1	Multiple_Complex
TC1000012011.hg.1	13.73	16.28	-5.87	5.86e-24	2.24e-21	RGS10	regulator of G-protein signaling 10	Multiple_Complex
TC0500009620.hg.1	9.71	10.86	-2.21	0.0002	0.0017	RGS14	regulator of G-protein signaling 14	Multiple_Complex
TC0100016631.hg.1	10.07	5.26	28.07	8.87e-26	4.64e-23	RGS16	regulator of G-protein signaling 16	Coding
TC0100011022.hg.1	9.52	7.74	3.41	7.84e-06	0.0001	RGS2	regulator of G-protein signaling 2	Multiple_Complex
TC1700008635.hg.1	7.84	4.39	10.94	9.86e-16	1.05e-13	RGS9	regulator of G-protein signaling 9	Multiple_Complex
TC1700011802.hg.1	13.37	10.53	7.14	3.49e-16	3.99e-14	RHBDF2	rhomboid 5 homolog 2 (Drosophila)	Multiple_Complex
TC0100018463.hg.1	8.78	6.35	5.36	4.84e-14	3.95e-12	RHOC	ras homolog family member C	Multiple_Complex
TC0100018355.hg.1	6.4	5.16	2.36	1.24e-05	0.0002	RHOU	ras homolog family member U	Multiple_Complex
TC1100006440.hg.1	8.31	7.18	2.18	3.3e-06	5.19e-05	RIC8A; MIR6743	RIC8 guanine nucleotide exchange factor A; microRNA 6743	Multiple_Complex
TC1200012270.hg.1	10.36	8.64	3.31	1.39e-10	6.06e-09	RILPL2	Rab interacting lysosomal protein-like 2	Multiple_Complex
TC0500011529.hg.1	6.27	7.55	-2.44	0.0008	0.0063	RIOK2	RIO kinase 2	Multiple_Complex
TC0X00010097.hg.1	9.83	10.97	-2.21	0.0008	0.0062	RLIM	ring finger protein, LIM domain interacting	Multiple_Complex
TC1500009120.hg.1	9.55	8.33	2.33	3.96e-06	6.13e-05	RMDN3	regulator of microtubule dynamics 3	Multiple_Complex
TC1900007098.hg.1	8.35	6.9	2.74	2.48e-05	0.0003	RNASEH2A	ribonuclease H2, subunit A	Multiple_Complex
TC0600014371.hg.1	10.64	12.19	-2.93	6.71e-06	9.67e-05	RNASET2	ribonuclease T2	Multiple_Complex
TC0200016705.hg.1	9.76	10.92	-2.24	4.63e-09	1.43e-07	RNF103-CHMP3; CHMP3	RNF103-CHMP3 readthrough; charged multivesicular body protein 3	Coding
TC0X00010653.hg.1	8.36	9.68	-2.5	3.82e-07	7.67e-06	RNF113A	ring finger protein 113A	Coding
TC0100015588.hg.1	10.58	9.53	2.07	3.01e-07	6.17e-06	RNF115	ring finger protein 115	Multiple_Complex
TC0500013429.hg.1	9.02	10.09	-2.1	0.0006	0.0048	RNF130	ring finger protein 130	Multiple_Complex
TC1700011787.hg.1	5.42	7.15	-3.32	3.28e-08	8.4e-07	RNF157	ring finger protein 157	Multiple_Complex
TC0300013703.hg.1	10.74	11.83	-2.12	8.04e-07	1.49e-05	RNF168	ring finger protein 168, E3 ubiquitin protein ligase	Multiple_Complex
TC0800011249.hg.1	11.71	8.93	6.87	1.33e-15	1.38e-13	RNF19A	ring finger protein 19A, RBR E3 ubiquitin protein ligase	Multiple_Complex
TC0700010170.hg.1	9.8	10.85	-2.07	3.06e-05	0.0004	RNF216	ring finger protein 216	Multiple_Complex
TC0600007636.hg.1	9.09	10.14	-2.07	0.0023	0.0152	RNF5	ring finger protein 5, E3 ubiquitin protein ligase	Multiple_Complex
TC0100018248.hg.1	9.05	10.15	-2.14	7.79e-06	0.0001	RNPC3	RNA binding region (RNP1, RRM) containing 3	Multiple_Complex
TC0300011628.hg.1	4.14	5.42	-2.43	3.73e-07	7.54e-06	ROBO1	roundabout guidance receptor 1	Multiple_Complex
TC0200011745.hg.1	8.21	7.12	2.14	0.0038	0.0233	ROCK2	Rho-associated, coiled-coil containing protein kinase 2	Multiple_Complex
TC1700010363.hg.1	5.56	4.56	2	0.0008	0.006	RP11-466A19.5; MYO1D	Transcript Identified by AceView, Entrez Gene ID(s) 4642; novel transcript, sense intronic MYO1D	NonCoding
TC1000008731.hg.1	11.27	12.28	-2.01	1.61e-08	4.48e-07	RPARP-AS1	RPARP antisense RNA 1	Multiple_Complex
TC1600008888.hg.1	14.37	15.67	-2.46	5.82e-10	2.23e-08	RPL13; SNORD68	ribosomal protein L13; small nucleolar RNA, C/D box 68	Multiple_Complex
TC0100012670.hg.1	16.06	17.08	-2.02	6.15e-11	2.89e-09	RPL22	ribosomal protein L22	Multiple_Complex
TC1100006791.hg.1	13.3	14.49	-2.28	1.39e-06	2.41e-05	RPL27A; SNORA3A; SNORA3B	ribosomal protein L27a; small nucleolar RNA, H/ACA box 3A; small nucleolar RNA, H/ACA box 3B	Multiple_Complex
TC0300013458.hg.1	9.06	7.78	2.44	6.53e-06	9.46e-05	RPL39L	ribosomal protein L39-like	Coding
TC0300012346.hg.1	13.06	11.5	2.95	2.66e-10	1.09e-08	RPN1	ribophorin I	Multiple_Complex
TC0100009903.hg.1	9.65	10.67	-2.03	7.04e-06	0.0001	RPRD2	regulation of nuclear pre-mRNA domain containing 2	Multiple_Complex
TC1100013147.hg.1	14.93	16.41	-2.79	1.41e-08	3.97e-07	RPS13; SNORD14B	ribosomal protein S13; small nucleolar RNA, C/D box 14B	Multiple_Complex
TC1900006890.hg.1	14.58	15.72	-2.2	9.72e-07	1.76e-05	RPS28	ribosomal protein S28	Multiple_Complex
TSUnmapped00000485.hg.1	11.37	10.34	2.04	1.84e-05	0.0002	RPS6KA1	ribosomal protein S6 kinase, 90kDa, polypeptide 1	Coding
TC0100007469.hg.1	6.76	5.4	2.56	9.69e-06	0.0001	RPS6KA1	ribosomal protein S6 kinase, 90kDa, polypeptide 1	Multiple_Complex
TC1900011698.hg.1	6.37	7.45	-2.11	7.45e-06	0.0001	RPSAP58; RPSA	ribosomal protein SA pseudogene 58; ribosomal protein SA	Multiple_Complex
TC0600012544.hg.1	7.81	9.33	-2.88	1.68e-05	0.0002	RRAGD	Ras-related GTP binding D	Multiple_Complex
TC1100010175.hg.1	9.83	8.22	3.06	5.85e-09	1.77e-07	RRAS2	related RAS viral (r-ras) oncogene homolog 2	Multiple_Complex
TC2000008499.hg.1	10	8.73	2.42	1.06e-06	1.89e-05	RRBP1	ribosome binding protein 1	Multiple_Complex
TC0300011146.hg.1	6.67	5.17	2.83	8.53e-07	1.56e-05	RRP9	ribosomal RNA processing 9, small subunit (SSU) processome component, homolog (yeast)	Multiple_Complex
TC0200016402.hg.1	5.32	6.46	-2.2	0.0022	0.015	RSAD2	radical S-adenosyl methionine domain containing 2	Multiple_Complex
TC0300009799.hg.1	6.48	7.77	-2.44	0.0001	0.001	RTP4	receptor (chemosensory) transporter protein 4	Coding
TC2100008562.hg.1	14.38	13.22	2.23	2.51e-07	5.25e-06	RUNX1	runt-related transcription factor 1	Multiple_Complex
TC0300014041.hg.1	9.08	7.84	2.36	6.21e-07	1.18e-05	RUVBL1	RuvB-like AAA ATPase 1	Multiple_Complex
TC0100015822.hg.1	11.56	10.02	2.91	2.66e-09	8.84e-08	S100A11	S100 calcium binding protein A11	Multiple_Complex
TC2100008477.hg.1	4.3	8.85	-23.53	1.04e-17	1.53e-15	S100B	S100 calcium binding protein B	Coding
TC0100009241.hg.1	13.6	14.9	-2.45	3.79e-08	9.54e-07	S1PR1	sphingosine-1-phosphate receptor 1	Multiple_Complex
TC1900011861.hg.1	11.26	10.16	2.15	5.52e-05	0.0006	S1PR2	sphingosine-1-phosphate receptor 2	Multiple_Complex
TC1900006621.hg.1	8.25	10	-3.38	2.4e-05	0.0003	S1PR4	sphingosine-1-phosphate receptor 4	Multiple_Complex
TC1900009633.hg.1	7.94	4.52	10.73	1.5e-12	9.23e-11	S1PR5	sphingosine-1-phosphate receptor 5	Coding
TC1300008329.hg.1	7.82	6.04	3.42	1.81e-07	3.94e-06	SACS	sacsin molecular chaperone	Multiple_Complex
TC0800011601.hg.1	3.65	6.12	-5.53	1.25e-08	3.56e-07	SAMD12	sterile alpha motif domain containing 12	Multiple_Complex
TC2100007599.hg.1	14.22	11.11	8.63	1.26e-11	6.65e-10	SAMSN1	SAM domain, SH3 domain and nuclear localization signals 1	Multiple_Complex
TC0400009330.hg.1	8.68	7.48	2.3	1.12e-06	1.99e-05	SAP30	Sin3A associated protein 30kDa	Multiple_Complex
TC0800010016.hg.1	10.44	12.88	-5.42	7.32e-23	2.45e-20	SARAF	store-operated calcium entry-associated regulatory factor	Multiple_Complex
TC1000008643.hg.1	11.67	10.03	3.12	1.59e-08	4.44e-07	SCD	stearoyl-CoA desaturase (delta-9-desaturase)	Multiple_Complex
TC0X00006715.hg.1	4.46	9.7	-37.8	1.11e-24	5.07e-22	SCML1	sex comb on midleg-like 1 (Drosophila)	Multiple_Complex
TC0600012763.hg.1	7.55	9.74	-4.54	5.92e-09	1.79e-07	SCML4	sex comb on midleg-like 4 (Drosophila)	Multiple_Complex
TC0100014218.hg.1	8.95	7.88	2.1	0.0015	0.0109	SCP2	Jeck2013 ANTISENSE, coding, INTERNAL, OVEXON, UTR3 best transcript NM_001007098	Multiple_Complex
TC0700010619.hg.1	5.27	8.13	-7.24	4.5e-08	1.11e-06	SCRN1	secernin 1	Multiple_Complex
TC0100016364.hg.1	7.24	8.35	-2.16	0.0008	0.0061	SCYL3	SCY1-like, kinase-like 3	Multiple_Complex
TC2000009218.hg.1	7.75	5.19	5.91	3.45e-16	3.96e-14	SDC4	syndecan 4	Multiple_Complex
TC2000009964.hg.1	5.86	6.89	-2.04	3.11e-05	0.0004	SDCBP2	syndecan binding protein (syntenin) 2	Multiple_Complex
TC2200006718.hg.1	10.63	8.22	5.33	1.52e-07	3.34e-06	SDF2L1	stromal cell-derived factor 2-like 1	Multiple_Complex
TC0100012454.hg.1	8.38	7.29	2.13	1.57e-05	0.0002	SDF4	stromal cell derived factor 4	Multiple_Complex
TC0700008430.hg.1	9.39	10.87	-2.8	1.71e-06	2.92e-05	SDHAF3	succinate dehydrogenase complex assembly factor 3	Multiple_Complex
TC1700011653.hg.1	4.85	10.59	-53.42	1.63e-21	4.11e-19	SDK2	sidekick cell adhesion molecule 2	Multiple_Complex
TC1800007446.hg.1	10.13	8.5	3.1	1.12e-11	5.99e-10	SEC11C	SEC11 homolog C, signal peptidase complex subunit	Multiple_Complex
TC0400011695.hg.1	10.99	9.6	2.63	2.35e-10	9.77e-09	SEC24D	SEC24 homolog D, COPII coat complex component	Multiple_Complex
TC0300008713.hg.1	7.91	5.89	4.04	2.41e-07	5.06e-06	SEC61A1	Sec61 translocon alpha 1 subunit	Multiple_Complex
TC0900008207.hg.1	14.49	12.8	3.22	1.38e-12	8.64e-11	SEC61B	Sec61 translocon beta subunit	Multiple_Complex
TC0700011119.hg.1	14.94	13.8	2.21	7.42e-08	1.75e-06	SEC61G	Sec61 translocon gamma subunit	Multiple_Complex
TC1800006748.hg.1	8.63	7.61	2.03	0.0002	0.0015	SEH1L	SEH1-like nucleoporin	Multiple_Complex
TC0400010282.hg.1	11.29	10.24	2.07	5.02e-07	9.74e-06	SEL1L3	sel-1 suppressor of lin-12-like 3 (C. elegans)	Multiple_Complex
TC0100016359.hg.1	10.49	15.33	-28.68	5.97e-27	3.55e-24	SELL	selectin L	Multiple_Complex
TC0100016360.hg.1	5.34	7.45	-4.31	0.0037	0.0231	SELL	Memczak2013 ALT_ACCEPTOR, ALT_DONOR, coding, INTERNAL, intronic best transcript NM_000655	NonCoding
TC1200011845.hg.1	12.68	13.85	-2.25	4.35e-07	8.59e-06	SELPLG	selectin P ligand	Coding
TC0100010155.hg.1	6.78	5.56	2.33	3.78e-06	5.87e-05	SEMA4A	sema domain, immunoglobulin domain (Ig), transmembrane domain (TM) and short cytoplasmic domain, (semaphorin) 4A	Multiple_Complex
TC1500010018.hg.1	9.2	6.12	8.47	4.04e-23	1.4e-20	SEMA7A	semaphorin 7A, GPI membrane anchor (John Milton Hagen blood group)	Multiple_Complex
TC0300011853.hg.1	6.13	7.85	-3.28	9.56e-08	2.2e-06	SENP7	SUMO1/sentrin specific peptidase 7	Multiple_Complex
TC0500011260.hg.1	6.04	8.96	-7.57	4.51e-16	5.03e-14	SERINC5	serine incorporator 5	Multiple_Complex
TC0500011263.hg.1	4.57	5.85	-2.42	2.22e-05	0.0003	SERINC5	Memczak2013 ALT_ACCEPTOR, ALT_DONOR, coding, INTERNAL, intronic best transcript NM_001174072	NonCoding
TC0600014220.hg.1	13.1	11.39	3.28	7.63e-06	0.0001	SERPINB9	serpin peptidase inhibitor, clade B (ovalbumin), member 9	Multiple_Complex
TC0100007552.hg.1	7.29	5.71	2.99	5.13e-09	1.57e-07	SESN2	sestrin 2	Multiple_Complex
TC1100012019.hg.1	6.73	8.3	-2.98	0.0007	0.0053	SESN3	sestrin 3	Multiple_Complex
TC1800007186.hg.1	9.63	5.12	22.78	4.35e-22	1.18e-19	SETBP1	SET binding protein 1	Multiple_Complex
TC1200009183.hg.1	8.33	9.34	-2.02	2.08e-05	0.0003	SETD1B	SET domain containing 1B	Multiple_Complex
TC0800009511.hg.1	4.39	6.35	-3.9	5.14e-12	2.91e-10	SGK223	homolog of rat pragma of Rnd2; Tyrosine-protein kinase SgK223 [Source:UniProtKB/Swiss-Prot;Acc:Q86YV5]	Coding
TC1000007936.hg.1	7.97	5.9	4.21	1.01e-10	4.5e-09	SGPL1	sphingosine-1-phosphate lyase 1	Multiple_Complex
TC0200010897.hg.1	8.24	6.14	4.31	1.1e-09	3.97e-08	SGPP2	sphingosine-1-phosphate phosphatase 2	Multiple_Complex
TC0500010932.hg.1	7.64	9.16	-2.86	1.24e-06	2.17e-05	SGTB	small glutamine-rich tetratricopeptide repeat (TPR)-containing, beta	Multiple_Complex
TC1200008873.hg.1	7.55	5.69	3.63	1.22e-06	2.14e-05	SH2B3	SH2B adaptor protein 3	Multiple_Complex
TC0X00008344.hg.1	10.95	9.76	2.28	8.18e-06	0.0001	SH2D1A	SH2 domain containing 1A	Multiple_Complex
TC0100016024.hg.1	12.62	8.9	13.13	1.35e-26	7.82e-24	SH2D2A	SH2 domain containing 2A	Multiple_Complex
TC2200007309.hg.1	8.93	9.96	-2.05	9.78e-06	0.0001	SH3BP1; PDXP	SH3-domain binding protein 1; pyridoxal (pyridoxine, vitamin B6) phosphatase	Multiple_Complex
TC0400006578.hg.1	7.64	6.04	3.02	5.08e-06	7.63e-05	SH3BP2	SH3-domain binding protein 2	Multiple_Complex
TC0X00009205.hg.1	12.57	11.34	2.34	8.24e-09	2.41e-07	SH3KBP1	SH3-domain kinase binding protein 1	Multiple_Complex
TC0200008811.hg.1	3.95	5.14	-2.28	6.96e-09	2.07e-07	SH3RF3	SH3 domain containing ring finger 3	Multiple_Complex
TC1200007866.hg.1	11.15	8.79	5.15	1.79e-18	3.08e-16	SHMT2	serine hydroxymethyltransferase 2 (mitochondrial)	Multiple_Complex
TC1100012681.hg.1	5.28	6.51	-2.33	0.0003	0.0026	SIAE	sialic acid acetylesterase	Multiple_Complex
TC1100009666.hg.1	6.61	7.62	-2.01	0.0001	0.0014	SIGIRR	single immunoglobulin and toll-interleukin 1 receptor (TIR) domain	Multiple_Complex
TC1100012424.hg.1	9.7	8.45	2.39	3.26e-09	1.04e-07	SIK3	SIK family kinase 3	Multiple_Complex
TC1100013045.hg.1	7.87	9.26	-2.61	1e-05	0.0001	SIPA1	signal-induced proliferation-associated 1	Multiple_Complex
TC2000009971.hg.1	4.51	7.34	-7.08	9.14e-17	1.14e-14	SIRPG	signal-regulatory protein gamma	Multiple_Complex
TC0700013527.hg.1	7.09	5.9	2.28	8.26e-05	0.0009	SKAP2	src kinase associated phosphoprotein 2	Multiple_Complex
TC0800011872.hg.1	9.71	8.42	2.45	2.23e-10	9.33e-09	SLA	Src-like-adaptor	Multiple_Complex
TC2000009013.hg.1	8.07	6.83	2.36	5.99e-06	8.75e-05	SLA2	Src-like-adaptor 2	Coding
TC1300007565.hg.1	9.67	11.14	-2.77	9.31e-07	1.69e-05	SLAIN1	SLAIN motif family member 1	Multiple_Complex
TC0100016138.hg.1	10.3	7.68	6.13	9.42e-11	4.25e-09	SLAMF1	signaling lymphocytic activation molecule family member 1	Multiple_Complex
TC0100010310.hg.1	11.55	7.59	15.53	7.31e-29	6.27e-26	SLAMF7	SLAM family member 7	Multiple_Complex
TC0X00011206.hg.1	10.09	8.84	2.37	6.02e-05	0.0007	SLC10A3	solute carrier family 10, member 3	Coding
TC0500009837.hg.1	4.84	6.03	-2.29	0.0003	0.003	SLC12A7	solute carrier family 12 (potassium/chloride transporter), member 7	Multiple_Complex
TC1100011014.hg.1	4.58	6.16	-2.99	2.04e-08	5.53e-07	SLC15A3	solute carrier family 15 (oligopeptide transporter), member 3	Multiple_Complex
TC1200012417.hg.1	10.63	7.54	8.52	1.94e-17	2.75e-15	SLC15A4	solute carrier family 15 (oligopeptide transporter), member 4	Multiple_Complex
TC0100015310.hg.1	7.36	6.21	2.21	0.0008	0.0065	SLC16A1	solute carrier family 16 (monocarboxylate transporter), member 1	Multiple_Complex
TSUnmapped00000474.hg.1	7.08	5.68	2.64	2.56e-06	4.16e-05	SLC16A1	solute carrier family 16 (monocarboxylate transporter), member 1	Coding
TC0600009143.hg.1	4.47	6.25	-3.43	8.33e-12	4.57e-10	SLC16A10	solute carrier family 16 (aromatic amino acid transporter), member 10	Multiple_Complex
TC2000008037.hg.1	7.15	6.11	2.05	0.0003	0.0026	SLC17A9	solute carrier family 17 (vesicular nucleotide transporter), member 9	Multiple_Complex
TC0200007821.hg.1	7.36	5.87	2.8	4.99e-06	7.5e-05	SLC1A4	solute carrier family 1 (glutamate/neutral amino acid transporter), member 4	Multiple_Complex
TC1900011004.hg.1	11.21	6.75	22.01	4.42e-32	6.77e-29	SLC1A5	solute carrier family 1 (neutral amino acid transporter), member 5	Multiple_Complex
TC0200008930.hg.1	8.12	6.69	2.7	1.76e-07	3.85e-06	SLC20A1	solute carrier family 20 (phosphate transporter), member 1	Multiple_Complex
TC0600010071.hg.1	5.79	4.65	2.2	6.59e-06	9.54e-05	SLC22A1	solute carrier family 22 (organic cation transporter), member 1	Multiple_Complex
TC1400008714.hg.1	7.22	8.78	-2.94	5.68e-12	3.18e-10	SLC22A17	solute carrier family 22, member 17	Multiple_Complex
TC0100015160.hg.1	6.47	5.26	2.3	2.27e-06	3.74e-05	SLC25A24	solute carrier family 25 (mitochondrial carrier; phosphate carrier), member 24	Multiple_Complex
TC0300008989.hg.1	9.67	10.99	-2.49	0.0004	0.0034	SLC25A36	solute carrier family 25 (pyrimidine nucleotide carrier), member 36	Multiple_Complex
TC0X00008246.hg.1	8.47	7.06	2.66	5.27e-05	0.0006	SLC25A43	solute carrier family 25, member 43	Multiple_Complex
TC0100010159.hg.1	8.87	7.57	2.46	4.53e-07	8.92e-06	SLC25A44	solute carrier family 25, member 44	Multiple_Complex
TC0X00010434.hg.1	4.63	6.08	-2.72	2.61e-08	6.88e-07	SLC25A53	solute carrier family 25, member 53	Multiple_Complex
TC1500007196.hg.1	7.08	3.96	8.7	2.16e-12	1.29e-10	SLC27A2	solute carrier family 27 (fatty acid transporter), member 2	Multiple_Complex
TC0900008860.hg.1	7.29	6.25	2.07	2.1e-05	0.0003	SLC27A4	solute carrier family 27 (fatty acid transporter), member 4	Multiple_Complex
TC0600008127.hg.1	5.84	4.74	2.15	6.25e-06	9.1e-05	SLC29A1	solute carrier family 29 (equilibrative nucleoside transporter), member 1	Multiple_Complex
TC0100017212.hg.1	7.26	6.25	2.01	0.0011	0.0085	SLC30A1	solute carrier family 30 (zinc transporter), member 1	Multiple_Complex
TC0100018390.hg.1	9.87	11.25	-2.6	4.52e-05	0.0005	SLC35E2	solute carrier family 35, member E2	Multiple_Complex
TC0100018388.hg.1	9.1	10.62	-2.85	8.02e-06	0.0001	SLC35E2B	solute carrier family 35, member E2B	Multiple_Complex
TC2200007068.hg.1	7.27	5.79	2.79	2.08e-09	7.11e-08	SLC35E4	solute carrier family 35, member E4	Multiple_Complex
TC0300008919.hg.1	6.01	4.74	2.4	0.0007	0.0058	SLC35G2	solute carrier family 35, member G2	Multiple_Complex
TC1200010516.hg.1	10.75	11.87	-2.17	4.51e-05	0.0005	SLC38A1	solute carrier family 38, member 1	Multiple_Complex
TC1100007884.hg.1	12.98	11.83	2.21	1.4e-07	3.11e-06	SLC3A2	solute carrier family 3 (amino acid transporter heavy chain), member 2	Multiple_Complex
TC1200011767.hg.1	7.46	5.86	3.05	1.87e-06	3.16e-05	SLC41A2	solute carrier family 41 (magnesium transporter), member 2	Multiple_Complex
TC2100008496.hg.1	9.39	11.38	-3.98	2.01e-14	1.79e-12	SLC5A3; MRPS6	solute carrier family 5 (sodium/myo-inositol cotransporter), member 3; mitochondrial ribosomal protein S6	Multiple_Complex
TC0100013949.hg.1	5.92	4.71	2.32	3.95e-08	9.92e-07	SLC6A9	solute carrier family 6 (neurotransmitter transporter, glycine), member 9	Multiple_Complex
TC1300008487.hg.1	11.03	7.96	8.43	1.53e-22	4.83e-20	SLC7A1	solute carrier family 7 (cationic amino acid transporter, y+ system), member 1	Multiple_Complex
TC1600011186.hg.1	12.01	5.79	74.61	5.36e-19	9.75e-17	SLC7A5	solute carrier family 7 (amino acid transporter light chain, L system), member 5	Multiple_Complex
TC1400008705.hg.1	4.08	6.85	-6.85	4.88e-15	4.76e-13	SLC7A8	solute carrier family 7 (amino acid transporter light chain, L system), member 8	Multiple_Complex
TC1200011993.hg.1	8.41	10.85	-5.42	3.95e-11	1.92e-09	SLC8B1	solute carrier family 8 (sodium/lithium/calcium exchanger), member B1	Multiple_Complex
TC0X00009541.hg.1	5.55	3.74	3.51	1.92e-07	4.16e-06	SLC9A7	solute carrier family 9, subfamily A (NHE7, cation proton antiporter 7), member 7	Multiple_Complex
TC1700010420.hg.1	9.35	8.03	2.49	2.04e-05	0.0003	SLFN11	schlafen family member 11	Multiple_Complex
TC1700012387.hg.1	8.37	7.02	2.54	1.78e-05	0.0002	SLFN12L	schlafen family member 12-like	Multiple_Complex
TC1700007585.hg.1	9.27	11.21	-3.83	1.64e-05	0.0002	SLFN5	schlafen family member 5	Multiple_Complex
TC0500013232.hg.1	9.76	8.58	2.26	0.0001	0.0013	SMAD5	SMAD family member 5	Multiple_Complex
TC1800008650.hg.1	8.94	7.26	3.2	8.14e-08	1.9e-06	SMAD7	SMAD family member 7	Multiple_Complex
TC2200009279.hg.1	11.7	13.44	-3.34	2.07e-06	3.45e-05	SMDT1	single-pass membrane protein with aspartate-rich tail 1	Multiple_Complex
TC1700009402.hg.1	6.92	7.96	-2.05	4.74e-05	0.0005	SMYD4	SET and MYND domain containing 4	Multiple_Complex
TC1400010620.hg.1	8.57	9.8	-2.34	3.03e-06	4.82e-05	SNAPC1	small nuclear RNA activating complex polypeptide 1	Multiple_Complex
TC0700009020.hg.1	9.47	8.02	2.74	6.38e-10	2.41e-08	SND1; SND1-IT1	staphylococcal nuclease and tudor domain containing 1; SND1 intronic transcript 1	Multiple_Complex
TC0200011379.hg.1	6.11	8.76	-6.31	4.1e-06	6.31e-05	SNED1	sushi, nidogen and EGF-like domains 1	Multiple_Complex
TC0900011998.hg.1	10.69	12.59	-3.72	5.41e-11	2.57e-09	SNORA17A; SNORA17B; SNHG7	small nucleolar RNA, H/ACA box 17A; small nucleolar RNA, H/ACA box 17B; small nucleolar RNA host gene 7	Multiple_Complex
TC1700007017.hg.1	12.66	14.07	-2.64	3.04e-11	1.51e-09	SNORD49A; SNORD65; LRRC75A-AS1	small nucleolar RNA, C/D box 49A; small nucleolar RNA, C/D box 65; LRRC75A antisense RNA 1	Multiple_Complex
TC0300007189.hg.1	8.46	10.94	-5.57	9.82e-15	9.2e-13	SNRK	SNF related kinase	Multiple_Complex
TC2000009972.hg.1	12.7	11.57	2.19	2.26e-07	4.8e-06	SNRPB	small nuclear ribonucleoprotein polypeptides B and B1	Multiple_Complex
TC1500010698.hg.1	11.6	13.53	-3.82	6.81e-17	8.91e-15	SNRPN; SNURF; SNORD107; PWARSN	small nuclear ribonucleoprotein polypeptide N; SNRPN upstream reading frame; small nucleolar RNA, C/D box 107; Prader Willi/Angelman region RNA, SNRPN neighbor	Multiple_Complex
TC0800011634.hg.1	5.58	7.26	-3.2	6.98e-07	1.31e-05	SNTB1	syntrophin, beta 1 (dystrophin-associated protein A1, 59kDa, basic component 1)	Multiple_Complex
TC0700006984.hg.1	8.44	6.52	3.79	3.52e-12	2.05e-10	SNX10	sorting nexin 10	Multiple_Complex
TC0800010949.hg.1	5.58	7.12	-2.9	1.59e-05	0.0002	SNX16	sorting nexin 16	Multiple_Complex
TC0500008483.hg.1	6.15	4.84	2.49	8.13e-07	1.5e-05	SNX24	sorting nexin 24	Multiple_Complex
TC1500007901.hg.1	5.74	4.73	2.02	2.06e-06	3.44e-05	SNX33	sorting nexin 33	Multiple_Complex
TC2000009986.hg.1	10.89	9.65	2.38	1.04e-06	1.86e-05	SNX5	sorting nexin 5	Multiple_Complex
TC1200008474.hg.1	9.3	4.95	20.4	2.04e-20	4.42e-18	SOCS2	suppressor of cytokine signaling 2	Coding
TC0600013119.hg.1	7.14	5.78	2.56	1.26e-07	2.84e-06	SOGA3; KIAA0408	SOGA family member 3; KIAA0408	Multiple_Complex
TC1100009309.hg.1	8.29	10.76	-5.53	1.18e-12	7.47e-11	SORL1	sortilin-related receptor, L(DLR class) A repeats containing	Multiple_Complex
TC1100012574.hg.1	11.25	13.27	-4.05	2.72e-09	9e-08	SORL1	Memczak2013 ANTISENSE, CDS, coding, INTERNAL best transcript NM_003105	NonCoding
TC0200015976.hg.1	11.12	12.23	-2.17	8.43e-05	0.0009	SP110	SP110 nuclear body protein	Multiple_Complex
TC0200011020.hg.1	11.65	10.1	2.94	2.89e-06	4.62e-05	SP140	SP140 nuclear body protein	Multiple_Complex
TC0100014127.hg.1	4.98	6.74	-3.38	5.95e-11	2.8e-09	SPATA6	spermatogenesis associated 6	Multiple_Complex
TC0200010410.hg.1	8.47	7.25	2.33	2.8e-06	4.5e-05	SPATS2L	spermatogenesis associated, serine-rich 2-like	Multiple_Complex
TC0100013466.hg.1	11.68	10.49	2.27	5.33e-10	2.06e-08	SPCS2	signal peptidase complex subunit 2	Multiple_Complex
TC1100008447.hg.1	12.57	11.24	2.51	5.51e-10	2.12e-08	SPCS2	signal peptidase complex subunit 2	Multiple_Complex
TC0400009379.hg.1	13.27	11.74	2.88	8.18e-12	4.5e-10	SPCS3	signal peptidase complex subunit 3	Multiple_Complex
TC1700007204.hg.1	5.7	4.56	2.22	0.0001	0.0013	SPECC1	sperm antigen with calponin homology and coiled-coil domains 1	Multiple_Complex
TC2200009234.hg.1	7.45	9.64	-4.56	3.23e-09	1.04e-07	SPECC1L-ADORA2A	SPECC1L-ADORA2A readthrough (NMD candidate)	Multiple_Complex
TC1300008614.hg.1	6.7	10.12	-10.7	7.2e-13	4.8e-11	SPG20	spastic paraplegia 20 (Troyer syndrome)	Multiple_Complex
TC1700008945.hg.1	4.84	3.81	2.04	4.52e-06	6.9e-05	SPHK1	sphingosine kinase 1	Multiple_Complex
TC0300012023.hg.1	6.46	8.23	-3.41	1.78e-08	4.92e-07	SPICE1	spindle and centriole associated protein 1	Multiple_Complex
TC0400010780.hg.1	5.13	7.05	-3.79	3.68e-14	3.05e-12	SPINK2	serine peptidase inhibitor, Kazal type 2 (acrosin-trypsin inhibitor)	Multiple_Complex
TC1500006972.hg.1	7.97	5.42	5.83	7.59e-15	7.23e-13	SPINT1	serine peptidase inhibitor, Kunitz type 1	Multiple_Complex
TC1900011725.hg.1	6.86	9.38	-5.76	3.22e-11	1.59e-09	SPINT2	serine peptidase inhibitor, Kunitz type, 2	Multiple_Complex
TC1600009935.hg.1	10.57	9.31	2.4	0.0002	0.0021	SPN	Memczak2013 ANTISENSE, CDS, coding, INTERNAL best transcript NM_003123	NonCoding
TC1000010976.hg.1	9.87	11.3	-2.68	3.24e-05	0.0004	SPOCK2	sparc/osteonectin, cwcv and kazal-like domains proteoglycan (testican) 2	Multiple_Complex
TC0400008091.hg.1	6.06	7.49	-2.69	0.0034	0.0215	SPP1	secreted phosphoprotein 1	Multiple_Complex
TC1500009396.hg.1	14.71	13.25	2.74	8.63e-09	2.51e-07	SPPL2A	signal peptide peptidase like 2A	Multiple_Complex
TC1900011642.hg.1	7.11	8.61	-2.83	4e-06	6.18e-05	SPPL2B	signal peptide peptidase like 2B	Multiple_Complex
TC0200012863.hg.1	4.73	3.61	2.17	1.77e-06	3e-05	SPRED2	sprouty-related, EVH1 domain containing 2	Multiple_Complex
TC0200007609.hg.1	10.06	12.59	-5.76	2.68e-15	2.71e-13	SPTBN1	spectrin, beta, non-erythrocytic 1	Multiple_Complex
TC0800008783.hg.1	8.86	7.13	3.32	6.1e-07	1.16e-05	SQLE	squalene epoxidase	Multiple_Complex
TC0400007556.hg.1	9.65	8.46	2.29	0.0062	0.0347	SRD5A3	steroid 5 alpha-reductase 3	Multiple_Complex
TC1700009949.hg.1	9.8	11.64	-3.56	1.66e-06	2.84e-05	SREBF1	sterol regulatory element binding transcription factor 1	Multiple_Complex
TC0100011364.hg.1	9.04	7.69	2.56	3.77e-08	9.5e-07	SRGAP2	SLIT-ROBO Rho GTPase activating protein 2	Multiple_Complex
TC0100015572.hg.1	8.97	7.33	3.12	3.94e-06	6.1e-05	SRGAP2B	SLIT-ROBO Rho GTPase activating protein 2B	Multiple_Complex
TC0100009658.hg.1	9.38	8.18	2.3	8.72e-05	0.0009	SRGAP2C	SLIT-ROBO Rho GTPase activating protein 2C	Multiple_Complex
TC1000010870.hg.1	17.79	16	3.46	3.87e-21	9.54e-19	SRGN	Memczak2013 ANTISENSE, coding, INTERNAL, UTR3 best transcript NM_002727	NonCoding
TC1000007883.hg.1	13.2	11.15	4.16	2.03e-19	4.03e-17	SRGN	serglycin	Multiple_Complex
TC0100012869.hg.1	9.71	8.62	2.12	3.65e-05	0.0004	SRM	spermidine synthase	Multiple_Complex
TC0300013874.hg.1	10.29	9.07	2.32	4.42e-05	0.0005	SRPRB	signal recognition particle receptor, B subunit	Multiple_Complex
TC0700008568.hg.1	12.18	11.15	2.05	1.67e-06	2.84e-05	SRRT	serrate, RNA effector molecule	Multiple_Complex
TC1400007562.hg.1	14.97	16.11	-2.21	0.0003	0.0029	SRSF5	serine/arginine-rich splicing factor 5	Multiple_Complex
TC0500013336.hg.1	9.67	11.15	-2.79	3.51e-08	8.92e-07	SSBP2	single-stranded DNA binding protein 2	Multiple_Complex
TC1200012841.hg.1	8.33	6.91	2.69	1.74e-05	0.0002	SSH1	slingshot protein phosphatase 1	Multiple_Complex
TC1700010254.hg.1	9.47	10.8	-2.52	1.64e-08	4.55e-07	SSH2	slingshot protein phosphatase 2	Multiple_Complex
TC1500010899.hg.1	8.01	9.51	-2.84	3.27e-06	5.15e-05	ST20-MTHFS	ST20-MTHFS readthrough	Multiple_Complex
TC1100009453.hg.1	5.09	3.86	2.35	0.0001	0.0011	ST3GAL4	ST3 beta-galactoside alpha-2,3-sialyltransferase 4	Multiple_Complex
TC0300009789.hg.1	8.47	10.44	-3.91	2.4e-10	9.92e-09	ST6GAL1	ST6 beta-galactosamide alpha-2,6-sialyltranferase 1	Multiple_Complex
TC0700008882.hg.1	7.28	5.14	4.4	6.01e-13	4.04e-11	ST7; ST7-OT4; ST7-OT3; MIR6132	suppression of tumorigenicity 7; ST7 overlapping transcript 4; ST7 overlapping transcript 3; microRNA 6132	Multiple_Complex
TC1200012775.hg.1	6.9	5	3.73	3.32e-06	5.22e-05	ST8SIA1	ST8 alpha-N-acetyl-neuraminide alpha-2,8-sialyltransferase 1	Multiple_Complex
TC0500011579.hg.1	6.98	5.57	2.67	7.46e-09	2.2e-07	ST8SIA4	ST8 alpha-N-acetyl-neuraminide alpha-2,8-sialyltransferase 4	Multiple_Complex
TC0500011702.hg.1	10.48	8.67	3.5	4.16e-12	2.42e-10	STARD4	StAR-related lipid transfer domain containing 4	Multiple_Complex
TC1500010908.hg.1	9.23	11.12	-3.71	3.7e-13	2.57e-11	STARD5	StAR-related lipid transfer domain containing 5	NonCoding
TC1500010909.hg.1	8.45	9.97	-2.86	2.37e-10	9.85e-09	STARD5	StAR-related lipid transfer domain containing 5	Multiple_Complex
TC0200013515.hg.1	10.68	9.11	2.97	2.37e-12	1.41e-10	STARD7	StAR-related lipid transfer domain containing 7	Multiple_Complex
TC0200015242.hg.1	13.66	14.99	-2.51	1.92e-05	0.0002	STAT1	signal transducer and activator of transcription 1	Multiple_Complex
TC1700007883.hg.1	11.63	10.08	2.93	9.84e-11	4.4e-09	STAT5A	signal transducer and activator of transcription 5A	Multiple_Complex
TC1700010717.hg.1	12.24	10.68	2.94	9.57e-11	4.3e-09	STAT5B	signal transducer and activator of transcription 5B	Multiple_Complex
TC0400012781.hg.1	8.12	9.77	-3.14	2.06e-05	0.0003	STIM2	stromal interaction molecule 2	NonCoding
TC1100007935.hg.1	12.38	10.85	2.89	1.3e-16	1.59e-14	STIP1	stress-induced phosphoprotein 1	Multiple_Complex
TC0700007345.hg.1	11.76	13.78	-4.07	2.89e-14	2.45e-12	STK17A	serine/threonine kinase 17a	Multiple_Complex
TC0800011216.hg.1	7.35	5.97	2.61	5.19e-05	0.0006	STK3	serine/threonine kinase 3	Multiple_Complex
TC0600011661.hg.1	11.21	12.43	-2.33	1.56e-07	3.43e-06	STK38	serine/threonine kinase 38	Multiple_Complex
TC0200014834.hg.1	11.83	10.8	2.05	5.79e-06	8.49e-05	STK39	serine threonine kinase 39	Multiple_Complex
TC2000009823.hg.1	6.29	7.39	-2.14	1.36e-06	2.36e-05	STMN3	stathmin-like 3	Multiple_Complex
TC0900011404.hg.1	9.7	7.97	3.32	5.26e-06	7.83e-05	STOM	stomatin	Multiple_Complex
TC0200010448.hg.1	8.91	10.12	-2.32	5.58e-06	8.24e-05	STRADB	STE20-related kinase adaptor beta	Multiple_Complex
TC1100013110.hg.1	13.81	12.47	2.52	3.75e-10	1.5e-08	STT3A	STT3A, subunit of the oligosaccharyltransferase complex (catalytic)	Multiple_Complex
TC0600009710.hg.1	11.82	8.59	9.41	9.92e-22	2.53e-19	STX11	syntaxin 11	Coding
TC2000009949.hg.1	8	9.88	-3.68	1.94e-07	4.2e-06	STX16	syntaxin 16	Multiple_Complex
TC0900008811.hg.1	7.07	8.4	-2.52	4.09e-05	0.0005	STXBP1	syntaxin binding protein 1	Multiple_Complex
TC1900011656.hg.1	11.3	10.29	2.02	0.0002	0.0019	STXBP2	syntaxin binding protein 2	Multiple_Complex
TC0500007075.hg.1	15.16	14.15	2.01	2.96e-09	9.7e-08	SUB1	SUB1 homolog, transcriptional regulator	Multiple_Complex
TC0300011436.hg.1	6.1	7.25	-2.21	7.47e-05	0.0008	SUCLG2	succinate-CoA ligase, GDP-forming, beta subunit	Multiple_Complex
TC0700013323.hg.1	8.07	9.32	-2.38	1.17e-05	0.0002	SUN1	Sad1 and UNC84 domain containing 1	Multiple_Complex
TC2200009353.hg.1	7.94	9.39	-2.73	7.7e-08	1.81e-06	SUN2	Sad1 and UNC84 domain containing 2	Multiple_Complex
TC0600011927.hg.1	10.08	11.67	-3.01	7.81e-10	2.9e-08	SUPT3H	SPT3 homolog, SAGA and STAGA complex component	Multiple_Complex
TSUnmapped00000489.hg.1	9.38	8.34	2.05	4.66e-07	9.14e-06	SURF4	surfeit 4	NonCoding
TSUnmapped00000329.hg.1	8.72	7.68	2.06	3.49e-07	7.09e-06	SURF4	surfeit 4	NonCoding
TSUnmapped00000258.hg.1	9.86	8.6	2.39	4.03e-08	1.01e-06	SURF4	surfeit 4	NonCoding
TSUnmapped00000076.hg.1	10.01	8.58	2.69	1.36e-11	7.11e-10	SURF4	surfeit 4	Coding
TSUnmapped00000205.hg.1	13.17	11.71	2.77	3.04e-09	9.89e-08	SURF4	surfeit 4	Coding
TSUnmapped00000333.hg.1	13.76	12.25	2.85	8.88e-10	3.27e-08	SURF4	surfeit 4	Coding
TSUnmapped00000477.hg.1	13.79	12.27	2.87	1.17e-08	3.34e-07	SURF4	surfeit 4	Coding
TC0900011842.hg.1	8.15	6.53	3.06	6.24e-10	2.36e-08	SURF4	surfeit 4	Multiple_Complex
TC0900011220.hg.1	7.49	6.21	2.44	4.68e-06	7.1e-05	SUSD1	sushi domain containing 1	Multiple_Complex
TC0900007976.hg.1	8.24	10.43	-4.55	8.95e-11	4.07e-09	SUSD3	sushi domain containing 3	Coding
TC1400007558.hg.1	11.12	9.99	2.18	1.75e-05	0.0002	SUSD6	sushi domain containing 6	Multiple_Complex
TC0100014772.hg.1	5.08	6.32	-2.37	2.76e-07	5.72e-06	SYDE2	synapse defective 1, Rho GTPase, homolog 2 (C. elegans)	Multiple_Complex
TC0100013348.hg.1	11.55	12.96	-2.66	7.17e-05	0.0008	SYF2	SYF2 pre-mRNA-splicing factor	Multiple_Complex
TC0600014111.hg.1	9.67	11.8	-4.37	9.31e-12	5.03e-10	SYNGAP1; MIR5004	synaptic Ras GTPase activating protein 1; microRNA 5004	Multiple_Complex
TC1700010497.hg.1	11.86	12.93	-2.11	6.98e-11	3.24e-09	SYNRG	synergin, gamma	Multiple_Complex
TC0700012180.hg.1	6.2	7.29	-2.13	3.78e-06	5.87e-05	SYPL1	synaptophysin-like 1	Multiple_Complex
TC0100010140.hg.1	10.32	8.62	3.24	2.68e-12	1.59e-10	SYT11	synaptotagmin XI	Coding
TC0600010021.hg.1	11.84	9.51	5.03	2.92e-15	2.91e-13	SYTL3	synaptotagmin-like 3	Multiple_Complex
TC1100013186.hg.1	11.29	10.01	2.43	1.08e-05	0.0001	SYVN1	synovial apoptosis inhibitor 1, synoviolin	Multiple_Complex
TC0200009986.hg.1	5.95	4.56	2.62	1.24e-06	2.17e-05	ZAK; pk	sterile alpha motif and leucine zipper containing kinase AZK; Mitogen-activated protein kinase kinase kinase MLT [Source:UniProtKB/Swiss-Prot;Acc:Q9NYL2]; Salzman2013 ANNOTATED, CDS, coding, INTERNAL, OVCODE, OVERLAPTX, OVEXON best transcript NM_133646; Salzman2013 ANNOTATED, CDS, coding, OVCODE, OVERLAPTX, OVEXON, UTR3 best transcript NM_016653; Salzman2013 ANNOTATED, CDS, coding, OVCODE, OVERLA…	Multiple_Complex
TC0200008556.hg.1	10	11.21	-2.3	2e-08	5.42e-07	ZAP70	zeta chain of T cell receptor associated protein kinase 70kDa	Multiple_Complex
TC1400007442.hg.1	11.48	12.55	-2.1	0.004	0.0243	ZBTB1	zinc finger and BTB domain containing 1	Multiple_Complex
TC1800007960.hg.1	6.04	7.47	-2.71	8.65e-07	1.58e-05	ZBTB14	zinc finger and BTB domain containing 14	Multiple_Complex
TC0100012211.hg.1	5.35	6.86	-2.86	2.2e-10	9.23e-09	ZBTB18	zinc finger and BTB domain containing 18	Multiple_Complex
TC0300012048.hg.1	10.69	12.17	-2.8	0.002	0.0135	ZBTB20; MIR568	zinc finger and BTB domain containing 20; microRNA 568	Multiple_Complex
TC1400009410.hg.1	12.02	13.67	-3.14	1.82e-08	5.01e-07	ZBTB25	zinc finger and BTB domain containing 25	Multiple_Complex
TC0300008999.hg.1	11.55	8.81	6.7	1.45e-13	1.08e-11	ZBTB38	zinc finger and BTB domain containing 38	Multiple_Complex
TC1700009640.hg.1	9.41	10.69	-2.42	3.75e-07	7.56e-06	ZBTB4	zinc finger and BTB domain containing 4	Multiple_Complex
TC0100010104.hg.1	8.15	6.8	2.55	4.53e-08	1.12e-06	ZBTB7B	zinc finger and BTB domain containing 7B	Multiple_Complex
TC0600013519.hg.1	9.97	11.71	-3.34	1.38e-07	3.07e-06	ZC3H12D	zinc finger CCCH-type containing 12D	Multiple_Complex
TC0200008911.hg.1	6.85	8.78	-3.8	2.92e-05	0.0004	ZC3H6	zinc finger CCCH-type containing 6	Multiple_Complex
TC0X00009890.hg.1	8.78	10.49	-3.27	6.43e-09	1.92e-07	ZC4H2	zinc finger, C4H2 domain containing	Multiple_Complex
TC1600011168.hg.1	7.56	8.72	-2.23	2.79e-07	5.76e-06	ZCCHC14	zinc finger, CCHC domain containing 14	Multiple_Complex
TC0600009980.hg.1	6.72	5.17	2.92	1.47e-08	4.13e-07	ZDHHC14	zinc finger, DHHC-type containing 14	Multiple_Complex
TC0100007484.hg.1	10.14	9.03	2.17	5.1e-05	0.0006	ZDHHC18	zinc finger, DHHC-type containing 18	Multiple_Complex
TC0700006649.hg.1	7.7	8.81	-2.17	8.44e-05	0.0009	ZDHHC4	zinc finger, DHHC-type containing 4	Multiple_Complex
TC1000007199.hg.1	10.49	12.24	-3.36	1.16e-06	2.04e-05	ZEB1	zinc finger E-box binding homeobox 1	Multiple_Complex
TC0200014512.hg.1	11.35	5.66	51.95	2.3e-24	9.15e-22	ZEB2	zinc finger E-box binding homeobox 2	Multiple_Complex
TC0900011655.hg.1	6.47	7.63	-2.23	0.0006	0.005	ZER1	zyg-11 related, cell cycle regulator	Multiple_Complex
TC0800012435.hg.1	9.19	10.54	-2.54	1.47e-06	2.53e-05	ZFAND1	zinc finger, AN1-type domain 1	Multiple_Complex
TC0200010836.hg.1	7.95	9.1	-2.22	4.28e-08	1.06e-06	ZFAND2B	zinc finger, AN1-type domain 2B	Multiple_Complex
TC0200012404.hg.1	7.11	8.46	-2.55	0.0003	0.003	ZFP36L2	ZFP36 ring finger protein-like 2	Multiple_Complex
TC0100008308.hg.1	4.87	6.22	-2.54	3.49e-06	5.46e-05	ZFYVE9	zinc finger, FYVE domain containing 9	Multiple_Complex
TC1900009001.hg.1	5.15	7.54	-5.25	3.64e-06	5.67e-05	ZIK1	zinc finger protein interacting with K protein 1	Multiple_Complex
TC0700008517.hg.1	10.04	11.07	-2.05	0.0083	0.0441	ZKSCAN1	zinc finger with KRAB and SCAN domains 1	Multiple_Complex
TC0X00010375.hg.1	6.9	8.65	-3.35	0.0007	0.0054	ZMAT1	zinc finger, matrin-type 1	Multiple_Complex
TC1200012736.hg.1	4.94	6.24	-2.46	0.0002	0.0017	ZNF10	zinc finger protein 10	Multiple_Complex
TC1900010158.hg.1	10.06	11.24	-2.27	0.0003	0.0024	ZNF100	zinc finger protein 100	Multiple_Complex
TC1900007447.hg.1	8.63	11.34	-6.56	1.39e-13	1.04e-11	ZNF101	zinc finger protein 101	Multiple_Complex
TC0700013370.hg.1	10.33	11.7	-2.58	0.0086	0.0455	ZNF107; MIR6839	zinc finger protein 107; microRNA 6839	Multiple_Complex
TC1900009022.hg.1	4.06	5.73	-3.18	1.74e-09	6.05e-08	ZNF135	zinc finger protein 135	Multiple_Complex
TC0700013371.hg.1	8.97	9.99	-2.02	0.0009	0.0068	ZNF138	zinc finger protein 138	Multiple_Complex
TC1900010078.hg.1	6.47	7.66	-2.27	0.0047	0.0281	ZNF14	zinc finger protein 14	Multiple_Complex
TC0400012754.hg.1	8.78	9.93	-2.21	6.66e-06	9.63e-05	ZNF141	zinc finger protein 141	Multiple_Complex
TC0300012245.hg.1	10.36	11.45	-2.12	0.0017	0.0122	ZNF148	zinc finger protein 148	Multiple_Complex
TC1900011581.hg.1	5.13	6.24	-2.15	4.9e-07	9.56e-06	ZNF154	zinc finger protein 154	Multiple_Complex
TC1900010164.hg.1	9.1	10.37	-2.42	1.92e-05	0.0002	ZNF208	zinc finger protein 208	Multiple_Complex
TC1900011752.hg.1	5.65	7.26	-3.07	5.04e-08	1.23e-06	ZNF223	zinc finger protein 223	Multiple_Complex
TC1000010362.hg.1	6.11	7.71	-3.03	1.41e-05	0.0002	ZNF248	zinc finger protein 248	Multiple_Complex
TC1900007456.hg.1	10.26	11.93	-3.18	4.89e-06	7.38e-05	ZNF253	zinc finger protein 253	Multiple_Complex
TC0700013375.hg.1	7.31	8.8	-2.83	1.03e-10	4.59e-09	ZNF273	zinc finger protein 273	Multiple_Complex
TC1900011753.hg.1	5.35	6.39	-2.05	2.07e-05	0.0003	ZNF284	zinc finger protein 284	Multiple_Complex
TC1900007819.hg.1	9.54	10.65	-2.15	0.0002	0.002	ZNF302	zinc finger protein 302	Multiple_Complex
TC0600011162.hg.1	6.45	7.56	-2.16	0.0031	0.0199	ZNF322	zinc finger protein 322	Multiple_Complex
TC1000010411.hg.1	7.45	8.67	-2.33	0.002	0.0133	ZNF33B	zinc finger protein 33B	Multiple_Complex
TC1000007776.hg.1	5.58	4.41	2.25	9.01e-05	0.0009	ZNF365	zinc finger protein 365	Multiple_Complex
TC1900007963.hg.1	8.13	9.45	-2.48	0.0018	0.0124	ZNF383	zinc finger protein 383	Multiple_Complex
TC0700011944.hg.1	8.44	9.68	-2.37	0.0012	0.0089	ZNF394	zinc finger protein 394	Multiple_Complex
TC1900011972.hg.1	3.34	4.37	-2.03	6.52e-05	0.0007	ZNF404	zinc finger protein 404	Coding
TC1900011692.hg.1	6.74	7.97	-2.35	2.73e-06	4.41e-05	ZNF429	zinc finger protein 429	Multiple_Complex
TC1900010163.hg.1	9.5	10.55	-2.07	7.94e-05	0.0008	ZNF43	zinc finger protein 43	Multiple_Complex
TC1900007512.hg.1	5.77	7.12	-2.55	4.38e-07	8.65e-06	ZNF431; VN1R82P	zinc finger protein 431; vomeronasal 1 receptor 82 pseudogene	Multiple_Complex
TC1900011880.hg.1	8.01	9.37	-2.57	1.19e-06	2.09e-05	ZNF44	zinc finger protein 44	Multiple_Complex
TC1900011879.hg.1	4.46	5.53	-2.11	0.0011	0.0084	ZNF44	zinc finger protein 44	NonCoding
TC1900007049.hg.1	8.05	9.12	-2.09	1.08e-06	1.92e-05	ZNF440	zinc finger protein 440	Multiple_Complex
TC0X00008509.hg.1	5.39	7.06	-3.17	5.17e-05	0.0006	ZNF449	zinc finger protein 449	Coding
TC1900008692.hg.1	8.79	10.04	-2.39	4.58e-06	6.98e-05	ZNF480	zinc finger protein 480	Multiple_Complex
TC0900008425.hg.1	4.2	5.85	-3.13	1.35e-06	2.35e-05	ZNF483	zinc finger protein 483	Multiple_Complex
TC0200016418.hg.1	6.09	7.66	-2.96	4.87e-06	7.37e-05	ZNF512	zinc finger protein 512	Multiple_Complex
TC1800007440.hg.1	5.45	3.96	2.82	0.0006	0.0051	ZNF532	zinc finger protein 532	Multiple_Complex
TC1900011813.hg.1	6.41	7.88	-2.77	0.0009	0.0067	ZNF548	zinc finger protein 548	Multiple_Complex
TC1900011571.hg.1	5.36	6.51	-2.23	2.98e-05	0.0004	ZNF550	zinc finger protein 550	Multiple_Complex
TC1900009729.hg.1	5.1	7.11	-4.02	1.67e-11	8.59e-10	ZNF563	zinc finger protein 563	Multiple_Complex
TC1900011806.hg.1	7.96	9.19	-2.35	8.51e-05	0.0009	ZNF582-AS1	ZNF582 antisense RNA 1 (head to head)	NonCoding
TC1900011933.hg.1	8.88	10.37	-2.83	2.8e-09	9.21e-08	ZNF585A	zinc finger protein 585A	Multiple_Complex
TC1900011934.hg.1	9.46	10.7	-2.36	0.0067	0.0372	ZNF585B	zinc finger protein 585B	Multiple_Complex
TC0900007452.hg.1	3.37	4.56	-2.28	5.39e-05	0.0006	ZNF658	zinc finger protein 658	Coding
TC1900011582.hg.1	5.18	6.33	-2.22	6.08e-05	0.0007	ZNF671	zinc finger protein 671	Multiple_Complex
TC1900010221.hg.1	8.45	9.94	-2.8	2.3e-07	4.86e-06	ZNF681	zinc finger protein 681	Multiple_Complex
TC1900007053.hg.1	5.13	6.26	-2.19	1.59e-06	2.73e-05	ZNF69	zinc finger protein 69	Coding
TC1200012594.hg.1	6.52	8.43	-3.75	0.0006	0.0047	ZNF705A; FAM66C	zinc finger protein 705A; family with sequence similarity 66, member C	Multiple_Complex
TC1900011919.hg.1	7.99	9.48	-2.82	0.0001	0.0011	ZNF708	zinc finger protein 708	Multiple_Complex
TC0300011597.hg.1	5.9	7.27	-2.59	4.92e-05	0.0006	ZNF717	zinc finger protein 717	Multiple_Complex
TC0400009681.hg.1	6.54	7.56	-2.03	0.0025	0.0163	ZNF721; ABCA11P	zinc finger protein 721; ATP binding cassette subfamily A member 11, pseudogene	Multiple_Complex
TC1900011915.hg.1	8.27	9.39	-2.18	6.12e-05	0.0007	ZNF737	zinc finger protein 737	Multiple_Complex
TC1900011668.hg.1	6.02	7.98	-3.89	1.41e-06	2.43e-05	ZNF763	zinc finger protein 763	Coding
TC0700013490.hg.1	7.07	8.51	-2.71	5.81e-14	4.68e-12	ZNF775	zinc finger protein 775	Multiple_Complex
TC1900011821.hg.1	6.96	8.26	-2.47	2.88e-07	5.93e-06	ZNF776	zinc finger protein 776	Multiple_Complex
TSUnmapped00000670.hg.1	7.62	9.06	-2.72	0.0007	0.0059	ZNF780A	zinc finger protein 780A	Coding
TSUnmapped00000311.hg.1	7.62	9.06	-2.7	0.0001	0.0012	ZNF780A	zinc finger protein 780A	Coding
TSUnmapped00000630.hg.1	7.24	8.51	-2.41	2.21e-07	4.71e-06	ZNF780A	zinc finger protein 780A	Coding
TSUnmapped00000222.hg.1	7.68	8.93	-2.39	0.0005	0.0044	ZNF780A	zinc finger protein 780A	Coding
TC1900011952.hg.1	9.96	11.21	-2.37	1.47e-06	2.52e-05	ZNF780A	zinc finger protein 780A	Multiple_Complex
TC1900011936.hg.1	4.4	5.71	-2.49	0.0002	0.0019	ZNF781	zinc finger protein 781	Multiple_Complex
TC0900008804.hg.1	9.57	8.45	2.17	1.38e-06	2.39e-05	ZNF79	zinc finger protein 79	Multiple_Complex
TC1900010460.hg.1	6	7.61	-3.05	2.31e-08	6.17e-07	ZNF792	zinc finger protein 792	Multiple_Complex
TC0300012047.hg.1	9.83	6.88	7.71	7.26e-11	3.35e-09	ZNF80	zinc finger protein 80	Coding
TC0700013615.hg.1	10.24	11.3	-2.08	0.0009	0.0066	ZNF800	zinc finger protein 800	Multiple_Complex
TC1900012057.hg.1	6.92	7.93	-2.02	2.4e-07	5.06e-06	ZNF814	zinc finger protein 814	Multiple_Complex
TC1900007061.hg.1	6.02	7.84	-3.53	1.77e-07	3.86e-06	ZNF844	zinc finger protein 844	Coding
TC1900011858.hg.1	6.01	7.68	-3.19	1.26e-08	3.57e-07	ZNF846	zinc finger protein 846	Multiple_Complex
TC0300010891.hg.1	7.14	8.44	-2.45	0.0017	0.0119	ZNF852	zinc finger protein 852	Multiple_Complex
TC0700009647.hg.1	7.57	9.05	-2.79	0.0001	0.0012	ZNF862	zinc finger protein 862	Multiple_Complex
TC0900011246.hg.1	4.35	5.39	-2.05	0.0009	0.0072	ZNF883	zinc finger protein 883	Multiple_Complex
TC1600008427.hg.1	10.76	9.26	2.83	0.0002	0.0016	ZNRF1	zinc and ring finger 1, E3 ubiquitin protein ligase	Multiple_Complex
TC1900011605.hg.1	4.13	5.43	-2.47	2.61e-07	5.44e-06	ZSCAN18	zinc finger and SCAN domain containing 18	Multiple_Complex
TC0700008501.hg.1	7.04	8.61	-2.98	2.48e-09	8.26e-08	ZSCAN25	zinc finger and SCAN domain containing 25	Multiple_Complex
TC0600007410.hg.1	5.88	4.78	2.15	2.25e-06	3.71e-05	ZSCAN9	zinc finger and SCAN domain containing 9	Multiple_Complex
TC2000007507.hg.1	6.75	8.74	-3.98	2.12e-16	2.49e-14	ZSWIM1	zinc finger, SWIM-type containing 1	Multiple_Complex
TC0600008035.hg.1	10.49	12.03	-2.9	2.05e-10	8.61e-09	TAF8	TATA box binding protein associated factor 8	Multiple_Complex
TC0X00010136.hg.1	10.32	11.35	-2.05	0.0003	0.0023	TAF9B	TAF9B RNA polymerase II, TATA box binding protein (TBP)-associated factor, 31kDa	Multiple_Complex
TC0600013743.hg.1	11.24	9.74	2.83	2.12e-07	4.53e-06	TAGAP	T-cell activation RhoGTPase activating protein	Coding
TC0200009806.hg.1	12.31	10.45	3.63	3.24e-08	8.33e-07	TANK	TRAF family member-associated NFKB activator	Multiple_Complex
TC0400010132.hg.1	9.94	11.14	-2.29	0.0002	0.002	TAPT1	transmembrane anterior posterior transformation 1	Multiple_Complex
TC0100017788.hg.1	6.91	8.72	-3.53	3.79e-05	0.0004	TARBP1	TAR (HIV-1) RNA binding protein 1	Multiple_Complex
TC2200009338.hg.1	6.69	8.12	-2.7	1.35e-05	0.0002	TBC1D10A	TBC1 domain family, member 10A	Multiple_Complex
TC1100008133.hg.1	8.37	9.6	-2.36	4.95e-05	0.0006	TBC1D10C	TBC1 domain family, member 10C	Multiple_Complex
TC1200008184.hg.1	8.22	9.54	-2.49	8.49e-05	0.0009	TBC1D15	TBC1 domain family, member 15	Multiple_Complex
TC1300009271.hg.1	8.86	10.25	-2.62	9.66e-05	0.001	TBC1D4	TBC1 domain family, member 4	Multiple_Complex
TC1900007906.hg.1	11.73	10.54	2.29	0.0001	0.0013	TBCB	tubulin folding cofactor B	Multiple_Complex
TC1100009301.hg.1	6.66	8.44	-3.43	3.32e-08	8.5e-07	TBCEL	tubulin folding cofactor E-like	Multiple_Complex
TC0700010719.hg.1	5.56	4.44	2.18	0.0005	0.0044	TBX20	T-box 20	Multiple_Complex
TC1700008135.hg.1	6.78	4.92	3.62	1.22e-16	1.51e-14	TBX21	T-box 21	Multiple_Complex
TC1900009297.hg.1	5.06	6.38	-2.49	1.07e-07	2.43e-06	TBXA2R	thromboxane A2 receptor	Multiple_Complex
TC2000008107.hg.1	7.47	8.86	-2.62	8.45e-12	4.61e-10	TCEA2	transcription elongation factor A (SII), 2	Multiple_Complex
TC0100013278.hg.1	6.26	11.12	-28.94	4.44e-21	1.08e-18	TCEA3	transcription elongation factor A (SII), 3	Multiple_Complex
TC0X00011317.hg.1	7.05	8.7	-3.13	1.49e-10	6.45e-09	TCEAL1	transcription elongation factor A (SII)-like 1	Multiple_Complex
TC0X00007965.hg.1	4.09	5.88	-3.46	1.88e-10	7.96e-09	TCEAL2	transcription elongation factor A (SII)-like 2	Multiple_Complex
TC0X00011315.hg.1	7.55	8.6	-2.07	2.86e-06	4.57e-05	TCEAL3	transcription elongation factor A (SII)-like 3	Coding
TC0X00010406.hg.1	6.75	7.99	-2.37	4.18e-08	1.04e-06	TCEAL8	transcription elongation factor A (SII)-like 8	Multiple_Complex
TC0500008684.hg.1	8.3	11.03	-6.63	9.87e-25	4.6e-22	TCF7	transcription factor 7 (T-cell specific, HMG-box)	Multiple_Complex
TC0600013762.hg.1	11.78	10.57	2.32	0.0001	0.0011	TCP1; SNORA20; SNORA29	t-complex 1; small nucleolar RNA, H/ACA box 20; small nucleolar RNA, H/ACA box 29	Multiple_Complex
TC1200008726.hg.1	8.07	11.09	-8.14	1.25e-23	4.62e-21	TCP11L2	t-complex 11, testis-specific-like 2	Multiple_Complex
TC1200008848.hg.1	5.24	6.42	-2.27	0.0003	0.0029	TCTN1	tectonic family member 1	Multiple_Complex
TC1200012080.hg.1	6.06	4.56	2.83	4.66e-09	1.44e-07	TESC	tescalcin	Multiple_Complex
TC0900007085.hg.1	14.12	12.05	4.2	1.03e-13	7.88e-12	TESK1; MIR4667	testis-specific kinase 1; microRNA 4667	Multiple_Complex
TC1200010850.hg.1	10.68	12.15	-2.77	4.92e-07	9.58e-06	TESPA1	thymocyte expressed, positive selection associated 1	Multiple_Complex
TC1600009220.hg.1	7.06	8.33	-2.41	2.51e-06	4.08e-05	TFAP4	transcription factor AP-4 (activating enhancer binding protein 4)	Multiple_Complex
TC0300013684.hg.1	8.14	6.51	3.1	5.02e-06	7.55e-05	TFRC	transferrin receptor	Multiple_Complex
TC1900010743.hg.1	10.21	8.49	3.3	7.89e-07	1.46e-05	TGFB1	transforming growth factor beta 1	Multiple_Complex
TC0900008202.hg.1	7.81	6.39	2.69	2.82e-06	4.53e-05	TGFBR1	transforming growth factor, beta receptor 1	Multiple_Complex
TC0300006925.hg.1	13.33	14.84	-2.84	1.58e-13	1.16e-11	TGFBR2	transforming growth factor beta receptor II	Multiple_Complex
TC0100014910.hg.1	11.95	8.56	10.49	1.36e-17	1.97e-15	TGFBR3	transforming growth factor beta receptor III	Multiple_Complex
TC1800006513.hg.1	13.53	11.92	3.07	8.01e-14	6.25e-12	TGIF1	TGFB-induced factor homeobox 1	Multiple_Complex
TC2200008067.hg.1	10.06	11.08	-2.02	1.58e-07	3.45e-06	THAP7	THAP domain containing 7	Multiple_Complex
TC0100015817.hg.1	8.34	10.49	-4.44	1.22e-10	5.38e-09	THEM4	thioesterase superfamily member 4	Multiple_Complex
TC0600013125.hg.1	11.67	13.86	-4.56	2.63e-10	1.08e-08	THEMIS	thymocyte selection associated	Coding
TC1000007056.hg.1	6.05	7.18	-2.19	1.13e-06	1.99e-05	THNSL1	threonine synthase-like 1	Multiple_Complex
TC0500013414.hg.1	7.93	9.22	-2.45	1.21e-06	2.13e-05	THOC3	THO complex 3	Multiple_Complex
TC1700007777.hg.1	9.13	10.25	-2.16	2.08e-05	0.0003	THRA	thyroid hormone receptor, alpha	Multiple_Complex
TC1700010230.hg.1	7.38	6.37	2.01	6.25e-05	0.0007	TIAF1; MYO18A	TGFB1-induced anti-apoptotic factor 1; myosin XVIIIA	Multiple_Complex
TC0300008385.hg.1	12.69	6.73	61.92	7.62e-22	1.99e-19	TIGIT	T-cell immunoreceptor with Ig and ITIM domains	Multiple_Complex
TC1900011729.hg.1	8.37	7.26	2.16	0.0052	0.0302	TIMM50	translocase of inner mitochondrial membrane 50 homolog (S. cerevisiae)	Multiple_Complex
TC0X00007149.hg.1	6.19	7.19	-2	0.0015	0.0109	TIMP1	TIMP metallopeptidase inhibitor 1	Multiple_Complex
TC1700010209.hg.1	7.71	6.29	2.68	1.63e-07	3.57e-06	TLCD1	TLC domain containing 1	Multiple_Complex
TC1500009904.hg.1	9.87	11.08	-2.32	3.74e-05	0.0004	TLE3	transducin-like enhancer of split 3	Multiple_Complex
TC0900009950.hg.1	9.39	8.3	2.14	1.23e-05	0.0002	TLN1; MIR6852	talin 1; microRNA 6852	Multiple_Complex
TC0400012922.hg.1	5.54	4.13	2.66	0.0026	0.0173	TLR6	toll-like receptor 6	Multiple_Complex
TC1500008114.hg.1	5.68	4.63	2.07	3.36e-05	0.0004	TM6SF1	transmembrane 6 superfamily member 1	Multiple_Complex
TC1400010723.hg.1	9.21	7.52	3.22	7.93e-07	1.47e-05	TM9SF1	transmembrane 9 superfamily member 1	Multiple_Complex
TC0400009179.hg.1	8.26	7.26	2.01	0.0006	0.005	TMA16	translation machinery associated 16 homolog	Multiple_Complex
TC1200009247.hg.1	13.92	12.88	2.05	5.93e-10	2.26e-08	TMED2	transmembrane p24 trafficking protein 2	Multiple_Complex
TC0700006727.hg.1	6.06	7.27	-2.32	5.83e-09	1.76e-07	TMEM106B	transmembrane protein 106B	Multiple_Complex
TC1200011961.hg.1	6.23	7.66	-2.69	0.0002	0.0017	TMEM116	transmembrane protein 116	Multiple_Complex
TC1100012121.hg.1	15.82	16.82	-2.01	1.04e-06	1.86e-05	TMEM123	transmembrane protein 123	Multiple_Complex
TC0600014068.hg.1	8.7	10.42	-3.31	2.03e-07	4.35e-06	TMEM14C	transmembrane protein 14C	Multiple_Complex
TC0400012150.hg.1	4.79	6.57	-3.43	1.98e-05	0.0003	TMEM154	transmembrane protein 154	Multiple_Complex
TC0900010387.hg.1	6.16	4.79	2.59	0.0008	0.0062	TMEM2	Transcript Identified by AceView, Entrez Gene ID(s) 23670	Unassigned
TC0900010386.hg.1	10.79	8.88	3.74	2.65e-08	6.98e-07	TMEM2	transmembrane protein 2	Multiple_Complex
TC1600006550.hg.1	6.37	10.3	-15.31	2.03e-24	8.36e-22	TMEM204	transmembrane protein 204	Coding
TC1700009750.hg.1	5.44	8.27	-7.09	7.4e-21	1.76e-18	TMEM220	transmembrane protein 220	Multiple_Complex
TC0200015431.hg.1	6.47	5.46	2.02	0.0032	0.0205	TMEM237	transmembrane protein 237	Multiple_Complex
TC0700011698.hg.1	11.68	12.95	-2.4	5.19e-08	1.27e-06	TMEM243	transmembrane protein 243, mitochondrial	Multiple_Complex
TC0900011151.hg.1	7.97	9.51	-2.91	8.27e-07	1.52e-05	TMEM245	transmembrane protein 245	Multiple_Complex
TC1000008221.hg.1	6.3	7.61	-2.47	0.0005	0.0045	TMEM254	transmembrane protein 254	Multiple_Complex
TC1100010063.hg.1	6.17	7.26	-2.14	4.96e-05	0.0006	TMEM41B	transmembrane protein 41B	Multiple_Complex
TSUnmapped00000240.hg.1	7.69	9.16	-2.78	1.27e-10	5.59e-09	TMEM42	transmembrane protein 42	Coding
TC2100007996.hg.1	10.77	11.96	-2.29	0.0004	0.0038	TMEM50B	transmembrane protein 50B	Multiple_Complex
TC0100007403.hg.1	8.2	9.37	-2.26	1.91e-09	6.62e-08	TMEM57	transmembrane protein 57	Multiple_Complex
TC0700011601.hg.1	9.75	10.87	-2.18	5.49e-08	1.33e-06	TMEM60	transmembrane protein 60	Multiple_Complex
TC0100017500.hg.1	10.68	12.94	-4.77	6.33e-13	4.23e-11	TMEM63A	transmembrane protein 63A	Multiple_Complex
TC0800011071.hg.1	8.57	6.99	2.98	1.28e-08	3.61e-07	TMEM64	transmembrane protein 64	Multiple_Complex
TC0800012469.hg.1	6.89	8.82	-3.81	1.97e-06	3.31e-05	TMEM71	transmembrane protein 71	NonCoding
TC0800012470.hg.1	8.64	10.03	-2.61	3.84e-09	1.22e-07	TMEM71	transmembrane protein 71	Multiple_Complex
TC1700006773.hg.1	8.01	6.91	2.14	0.0005	0.0043	TMEM88	transmembrane protein 88	Coding
TC1700007811.hg.1	5.88	6.97	-2.13	0.0001	0.0011	TMEM99	transmembrane protein 99	Multiple_Complex
TC1900009330.hg.1	6.69	8.94	-4.73	3.22e-14	2.7e-12	TMIGD2	transmembrane and immunoglobulin domain containing 2	Coding
TC0900008150.hg.1	5.18	4.1	2.11	2.04e-06	3.42e-05	TMOD1	tropomodulin 1	Multiple_Complex
TC0600007596.hg.1	9.65	5.47	18.18	3.12e-22	9.16e-20	TNF	tumor necrosis factor	Multiple_Complex
TC0600009597.hg.1	16.02	14.97	2.06	4.22e-05	0.0005	TNFAIP3	tumor necrosis factor, alpha-induced protein 3	Multiple_Complex
TC0500008437.hg.1	11.43	9.77	3.15	7.18e-09	2.13e-07	TNFAIP8	tumor necrosis factor, alpha-induced protein 8	Multiple_Complex
TC0800009872.hg.1	5.79	8.37	-5.96	4.54e-09	1.41e-07	TNFRSF10D	tumor necrosis factor receptor superfamily, member 10d, decoy with truncated death domain	Coding
TC1800007508.hg.1	5	4	2.01	0.0043	0.0259	TNFRSF11A	Transcript Identified by AceView, Entrez Gene ID(s) 8792	Unassigned
TC0100018162.hg.1	10.35	11.63	-2.43	2.88e-07	5.93e-06	TNFRSF14	tumor necrosis factor receptor superfamily, member 14	Multiple_Complex
TC0100012452.hg.1	9.95	5.14	28.04	1.98e-24	8.33e-22	TNFRSF18	tumor necrosis factor receptor superfamily, member 18	Coding
TC0100006881.hg.1	12.69	9.28	10.6	4.77e-13	3.27e-11	TNFRSF1B; MIR4632; MIR7846	tumor necrosis factor receptor superfamily, member 1B; microRNA 4632; microRNA 7846	Multiple_Complex
TC0100018398.hg.1	9.05	11.01	-3.89	5.22e-09	1.6e-07	TNFRSF25	tumor necrosis factor receptor superfamily, member 25	Multiple_Complex
TC0100012453.hg.1	11.89	5.74	70.9	1.07e-27	7.65e-25	TNFRSF4	tumor necrosis factor receptor superfamily, member 4	Multiple_Complex
TC0100012734.hg.1	18.38	7.45	1949.61	7.92e-33	1.42e-29	TNFRSF9	tumor necrosis factor receptor superfamily, member 9	Coding
TC0300013146.hg.1	9.6	8.41	2.28	3.22e-06	5.08e-05	TNFSF10	tumor necrosis factor (ligand) superfamily, member 10	Multiple_Complex
TC1300010000.hg.1	5.39	7.71	-4.99	7.83e-08	1.84e-06	TNFSF13B	tumor necrosis factor (ligand) superfamily, member 13b	Multiple_Complex
TC1900009442.hg.1	10.5	6.41	17.09	6.57e-28	4.86e-25	TNFSF14	tumor necrosis factor (ligand) superfamily, member 14	Multiple_Complex
TC1900006804.hg.1	6.82	5.49	2.5	2.02e-09	6.94e-08	TNFSF9	tumor necrosis factor (ligand) superfamily, member 9	Multiple_Complex
TC0400009784.hg.1	9.62	7.76	3.63	8.42e-11	3.86e-09	TNIP2	TNFAIP3 interacting protein 2	Multiple_Complex
TC0400011735.hg.1	6.39	4.35	4.11	4.37e-08	1.08e-06	TNIP3	TNFAIP3 interacting protein 3	Multiple_Complex
TC0300011172.hg.1	5.69	8.57	-7.37	4.02e-16	4.54e-14	TNNC1	troponin C type 1 (slow)	Multiple_Complex
TC2200007419.hg.1	10.26	11.68	-2.68	8.89e-05	0.0009	TNRC6B	trinucleotide repeat containing 6B	Multiple_Complex
TC1700011121.hg.1	11.13	12.61	-2.78	6.61e-12	3.68e-10	TOB1	transducer of ERBB2, 1	Multiple_Complex
TC0100017815.hg.1	13.62	14.65	-2.03	6.32e-09	1.89e-07	TOMM20	translocase of outer mitochondrial membrane 20 homolog (yeast)	Multiple_Complex
TC2000009204.hg.1	10.94	9.73	2.31	2.29e-06	3.78e-05	TOMM34	translocase of outer mitochondrial membrane 34	Multiple_Complex
TC0700010453.hg.1	15.42	17.02	-3.04	6.09e-13	4.08e-11	TOMM7	translocase of outer mitochondrial membrane 7 homolog (yeast)	Multiple_Complex
TC0800010558.hg.1	9.47	5.28	18.19	4.81e-26	2.58e-23	TOX	thymocyte selection-associated high mobility group box	Multiple_Complex
TC1100010639.hg.1	9.11	7.61	2.82	2.3e-10	9.59e-09	TP53I11	tumor protein p53 inducible protein 11	Multiple_Complex
TC1200008933.hg.1	8.17	10.1	-3.8	1.91e-08	5.21e-07	TPCN1	two pore segment channel 1	Multiple_Complex
TC0700012917.hg.1	6.14	7.58	-2.7	0.0002	0.0019	TPK1	thiamin pyrophosphokinase 1	Multiple_Complex
TC0600010960.hg.1	9.11	7.66	2.73	1.01e-07	2.32e-06	TPMT	thiopurine S-methyltransferase	Multiple_Complex
TC1300007884.hg.1	8.65	9.94	-2.44	2.22e-07	4.73e-06	TPP2	tripeptidyl peptidase II	Multiple_Complex
TC0300013915.hg.1	6.13	3.86	4.81	8.13e-08	1.9e-06	TPRG1	tumor protein p63 regulated 1	Multiple_Complex
TC0300013914.hg.1	11.52	6.76	27.21	1.51e-17	2.18e-15	TPRG1	tumor protein p63 regulated 1	NonCoding
TC0200016699.hg.1	5.77	9.66	-14.86	2.06e-22	6.3e-20	TRABD2A	TraB domain containing 2A	Multiple_Complex
TC0600012871.hg.1	7.18	8.22	-2.06	0.0002	0.002	TRAF3IP2	TRAF3 interacting protein 2	Multiple_Complex
TC0100011458.hg.1	8.99	10.4	-2.66	9.72e-08	2.23e-06	TRAF3IP3	TRAF3 interacting protein 3	Multiple_Complex
TC0100011487.hg.1	5.67	6.78	-2.16	0.0028	0.0183	TRAF5	TNF receptor-associated factor 5	Multiple_Complex
TC1100010551.hg.1	9.77	8.71	2.08	6.85e-06	9.87e-05	TRAF6	TNF receptor-associated factor 6, E3 ubiquitin protein ligase	Multiple_Complex
TC0300010714.hg.1	6.69	8.59	-3.74	3.36e-10	1.35e-08	TRANK1	tetratricopeptide repeat and ankyrin repeat containing 1	Multiple_Complex
TC1600009200.hg.1	5.99	7.08	-2.13	0.0002	0.0021	TRAP1	TNF receptor-associated protein 1	Multiple_Complex
TC0300008290.hg.1	9.63	8.32	2.47	0.0037	0.023	TRAT1	T cell receptor associated transmembrane adaptor 1	Multiple_Complex
TC0700013538.hg.1	12.53	9.39	8.85	3.48e-13	2.42e-11	TRGJ1; TRGC2; TRGJ2; TRGV9; TRGC1; TRGJP; TRGJP2	T cell receptor gamma joining 1; T cell receptor gamma constant 2; T cell receptor gamma joining 2; T cell receptor gamma variable 9; T cell receptor gamma constant 1; T cell receptor gamma joining P; T cell receptor gamma joining P2	Multiple_Complex
TC0800008801.hg.1	6.89	5.41	2.78	6.3e-10	2.38e-08	TRIB1	tribbles pseudokinase 1	Multiple_Complex
TC1300007187.hg.1	10.38	9.2	2.27	1.34e-06	2.33e-05	TRIM13; KCNRG	tripartite motif containing 13; potassium channel regulator	Multiple_Complex
TC0900010968.hg.1	8.99	10.33	-2.54	3.25e-05	0.0004	TRIM14	tripartite motif containing 14	Multiple_Complex
TC0700013594.hg.1	6.67	8.02	-2.53	0.0008	0.0059	TRIM4	tripartite motif containing 4	Multiple_Complex
TC1500010732.hg.1	7.92	6.76	2.24	7.86e-06	0.0001	TRIM69	tripartite motif containing 69	Multiple_Complex
TC1900006819.hg.1	9.39	7.57	3.52	1.39e-09	4.92e-08	TRIP10	thyroid hormone receptor interactor 10	Multiple_Complex
TC2000008955.hg.1	10.64	9.37	2.41	5.19e-05	0.0006	TRPC4AP	transient receptor potential cation channel, subfamily C, member 4 associated protein	Multiple_Complex
TC0X00010473.hg.1	9.77	11.71	-3.84	1.23e-07	2.76e-06	TSC22D3	TSC22 domain family, member 3	Coding
TC0300006627.hg.1	6.74	7.84	-2.16	1.74e-06	2.95e-05	TSEN2	TSEN2 tRNA splicing endonuclease subunit	Multiple_Complex
TC0200013602.hg.1	5.9	7.09	-2.28	0.001	0.0074	TSGA10	testis specific 10	Multiple_Complex
TC2000007760.hg.1	4.26	7	-6.68	9.76e-11	4.38e-09	TSHZ2	teashirt zinc finger homeobox 2	Coding
TC1000008236.hg.1	8.63	9.66	-2.05	7.58e-05	0.0008	TSPAN14	tetraspanin 14	Multiple_Complex
TC0X00010329.hg.1	5.45	6.57	-2.18	0.0001	0.0012	TSPAN6	tetraspanin 6	Multiple_Complex
TC0600012958.hg.1	6.32	7.36	-2.06	2.97e-06	4.73e-05	TSPYL4	TSPY-like 4	Multiple_Complex
TC2200008630.hg.1	6.21	5.17	2.05	2.45e-06	4.02e-05	TST	thiosulfate sulfurtransferase (rhodanese)	Multiple_Complex
TC1100009078.hg.1	6.46	8.38	-3.78	5.96e-08	1.43e-06	TTC12	tetratricopeptide repeat domain 12	Multiple_Complex
TC0300009625.hg.1	7.68	9.11	-2.7	1.86e-07	4.03e-06	TTC14	tetratricopeptide repeat domain 14	Multiple_Complex
TC2100007072.hg.1	11.07	12.15	-2.11	0.0005	0.0045	TTC3	tetratricopeptide repeat domain 3	Multiple_Complex
TC0200011885.hg.1	8.18	9.91	-3.33	3.34e-07	6.8e-06	TTC32	tetratricopeptide repeat domain 32	Multiple_Complex
TC0900012209.hg.1	5.89	7.52	-3.1	8.66e-06	0.0001	TTC39B	tetratricopeptide repeat domain 39B	Multiple_Complex
TC1400009967.hg.1	5.42	4.29	2.18	8.3e-05	0.0009	TTC7B	tetratricopeptide repeat domain 7B	Multiple_Complex
TC1400007584.hg.1	5.79	9.72	-15.22	6.04e-17	7.94e-15	TTC9	tetratricopeptide repeat domain 9	Coding
TC0900011805.hg.1	5.84	7.03	-2.29	5.1e-05	0.0006	TTF1	transcription termination factor, RNA polymerase I	Multiple_Complex
TC0200010807.hg.1	8.05	7	2.07	0.0025	0.0164	TTLL4	tubulin tyrosine ligase-like family member 4	Multiple_Complex
TC0200016752.hg.1	6.74	8.04	-2.46	0.008	0.0427	TTN	titin	Multiple_Complex
TC1100006773.hg.1	5.02	6.06	-2.06	0.0002	0.0019	TUB	tubby bipartite transcription factor	Multiple_Complex
TC1200010618.hg.1	11.7	10.56	2.21	4.47e-09	1.39e-07	TUBA1A	tubulin, alpha 1a	Multiple_Complex
TC1200010616.hg.1	16.88	14.99	3.71	9.69e-19	1.72e-16	TUBA1B	tubulin, alpha 1b	Multiple_Complex
TC1200012624.hg.1	13.43	11.36	4.21	5.98e-18	9.43e-16	TUBA1C	tubulin, alpha 1c	Multiple_Complex
TC0200015771.hg.1	13.29	11.97	2.49	6.08e-10	2.31e-08	TUBA4A	tubulin, alpha 4a	Multiple_Complex
TC0900009274.hg.1	10.56	8.95	3.05	1.76e-11	9.04e-10	TUBB4B	tubulin, beta 4B class IVb	Multiple_Complex
TC1700007904.hg.1	11.45	10.41	2.06	0.0006	0.0047	TUBG1	tubulin, gamma 1	Multiple_Complex
TC1800006635.hg.1	7.7	6.18	2.88	1.54e-09	5.43e-08	TWSG1	twisted gastrulation BMP signaling modulator 1	Multiple_Complex
TC0400010615.hg.1	6.01	9.4	-10.47	1.96e-13	1.41e-11	TXK	TXK tyrosine kinase	Multiple_Complex
TC0900011177.hg.1	16.47	14.14	5.01	3.54e-19	6.75e-17	TXN	thioredoxin	Multiple_Complex
TC1700006702.hg.1	12.61	11.08	2.88	2.35e-09	7.89e-08	TXNDC17	thioredoxin domain containing 17	Multiple_Complex
TC0100015598.hg.1	11.3	13.87	-5.95	5.56e-23	1.89e-20	TXNIP	thioredoxin interacting protein	Multiple_Complex
TC0300014039.hg.1	3.62	5.74	-4.32	4.95e-12	2.83e-10	TXNRD3	thioredoxin reductase 3	Multiple_Complex
TC1800006448.hg.1	7.73	5.48	4.76	2.09e-11	1.06e-09	TYMS	thymidylate synthetase	Multiple_Complex
TC1900011930.hg.1	11.07	12.3	-2.34	3.41e-08	8.68e-07	U2AF1L4	U2 small nuclear RNA auxiliary factor 1-like 4	Multiple_Complex
TC0100010381.hg.1	10.99	9.96	2.05	0.0001	0.001	UAP1	UDP-N-acetylglucosamine pyrophosphorylase 1	Multiple_Complex
TC0300007393.hg.1	7.36	8.61	-2.38	4.98e-07	9.67e-06	UBA7	Memczak2013 ANTISENSE, coding, INTERNAL, intronic best transcript NM_003335	NonCoding
TC0300011081.hg.1	9.94	11.42	-2.78	1.22e-10	5.37e-09	UBA7; MIR5193	ubiquitin-like modifier activating enzyme 7; microRNA 5193	Multiple_Complex
TC2100007254.hg.1	12.35	14.19	-3.57	8.57e-13	5.62e-11	UBASH3A	ubiquitin associated and SH3 domain containing A	Multiple_Complex
TC0X00008253.hg.1	10.56	9.55	2.02	4.46e-09	1.39e-07	UBE2A	ubiquitin conjugating enzyme E2A	Multiple_Complex
TC0500008830.hg.1	12.01	13.21	-2.29	8.21e-09	2.4e-07	UBE2D2	ubiquitin conjugating enzyme E2D 2	Multiple_Complex
TC0400008284.hg.1	4.57	5.72	-2.21	0.0005	0.0045	UBE2D3	Memczak2013 ANTISENSE, coding, INTERNAL, intronic best transcript NM_181893	NonCoding
TC0300006827.hg.1	6.17	9.38	-9.23	9.29e-18	1.4e-15	UBE2E2	ubiquitin conjugating enzyme E2E 2	Multiple_Complex
TC0200016607.hg.1	11.51	10.16	2.54	1.6e-06	2.74e-05	UBE2F	ubiquitin-conjugating enzyme E2F (putative)	Multiple_Complex
TC1100010897.hg.1	12.51	13.65	-2.2	1.19e-05	0.0002	UBE2L6	ubiquitin-conjugating enzyme E2L 6	Multiple_Complex
TC0100015984.hg.1	10.11	9.02	2.13	1.99e-08	5.41e-07	UBQLN4	ubiquilin 4	Multiple_Complex
TC1100009932.hg.1	3.57	4.62	-2.07	2.69e-05	0.0003	UBQLNL	ubiquilin-like	Coding
TC1700010817.hg.1	10.02	11.04	-2.03	3.23e-08	8.33e-07	UBTF	upstream binding transcription factor, RNA polymerase I	Multiple_Complex
TC1100011094.hg.1	10.64	11.68	-2.05	5.08e-10	1.98e-08	UBXN1	UBX domain protein 1	Multiple_Complex
TC0100010467.hg.1	5.14	3.74	2.62	4.52e-06	6.9e-05	UCK2	Jeck2013 ALT_ACCEPTOR, ALT_DONOR, coding, INTERNAL, intronic best transcript NM_012474	NonCoding
TC0100018315.hg.1	10.11	6.9	9.3	1.15e-24	5.13e-22	UCK2; MIR3658	uridine-cytidine kinase 2; microRNA 3658	Multiple_Complex
TC1100010271.hg.1	6.63	4.72	3.75	1.01e-05	0.0001	UEVLD	UEV and lactate/malate dehyrogenase domains	Multiple_Complex
TC1200011671.hg.1	11.45	9.57	3.69	4.05e-07	8.09e-06	UHRF1BP1L	UHRF1 binding protein 1-like	Multiple_Complex
TC0600009819.hg.1	6.74	5.33	2.66	2.63e-07	5.47e-06	ULBP2	UL16 binding protein 2	Coding
TC0700007477.hg.1	10.37	9.1	2.4	1.42e-07	3.15e-06	UPP1	uridine phosphorylase 1	Multiple_Complex
TC0X00007668.hg.1	6.88	8	-2.17	8.22e-08	1.92e-06	UPRT	uracil phosphoribosyltransferase (FUR1) homolog (S. cerevisiae)	Multiple_Complex
TC2000008968.hg.1	7.14	8.49	-2.54	0.0002	0.0017	UQCC1	ubiquinol-cytochrome c reductase complex assembly factor 1	Multiple_Complex
TC1500007529.hg.1	12.07	13.56	-2.81	1.38e-12	8.64e-11	USP3	ubiquitin specific peptidase 3	Multiple_Complex
TC1500007531.hg.1	6.49	7.65	-2.23	0.0002	0.002	USP3	Memczak2013 ALT_ACCEPTOR, ALT_DONOR, coding, INTERNAL, intronic best transcript NM_006537	NonCoding
TC1200011588.hg.1	4.68	7.27	-6	2.73e-15	2.73e-13	USP44	ubiquitin specific peptidase 44	Multiple_Complex
TC0100007858.hg.1	7.75	6.65	2.15	0.0003	0.0026	UTP11L	UTP11-like, U3 small nucleolar ribonucleoprotein (yeast)	Multiple_Complex
TC1200008606.hg.1	7.9	6.87	2.05	0.0007	0.0059	UTP20	UTP20 small subunit (SSU) processome component	Multiple_Complex
TC0100009524.hg.1	5.23	3.72	2.85	9.83e-11	4.4e-09	VANGL1	VANGL planar cell polarity protein 1	Multiple_Complex
TC1400010195.hg.1	14.55	10.55	16.03	2.08e-23	7.55e-21	WARS	tryptophanyl-tRNA synthetase	Multiple_Complex
TC1900008329.hg.1	11.51	9.65	3.61	1.41e-12	8.76e-11	VASP	vasodilator-stimulated phosphoprotein	Multiple_Complex
TC0100015155.hg.1	7.4	5.9	2.84	2.2e-05	0.0003	VAV3	vav 3 guanine nucleotide exchange factor	Multiple_Complex
TC0X00008001.hg.1	5.64	6.77	-2.19	2.33e-07	4.91e-06	WBP5	WW domain binding protein 5	Coding
TC0100009221.hg.1	6.24	4.47	3.39	3.01e-09	9.83e-08	VCAM1	vascular cell adhesion molecule 1	Multiple_Complex
TC1000008056.hg.1	8.94	7.03	3.78	2.77e-12	1.64e-10	VCL	vinculin	Multiple_Complex
TC1200010559.hg.1	9.76	7.84	3.79	1.76e-13	1.28e-11	VDR	vitamin D (1,25- dihydroxyvitamin D3) receptor	Multiple_Complex
TC0400010033.hg.1	12.6	11.59	2.02	3.15e-05	0.0004	WDR1	WD repeat domain 1	Multiple_Complex
TC0200015463.hg.1	7.92	6.45	2.77	2.23e-05	0.0003	WDR12	WD repeat domain 12	Multiple_Complex
TC0400007280.hg.1	5.35	6.5	-2.23	0.0073	0.0398	WDR19	WD repeat domain 19	Multiple_Complex
TC0600014006.hg.1	5.43	6.47	-2.04	0.0018	0.0127	WDR27	WD repeat domain 27	Multiple_Complex
TC0300012187.hg.1	6.72	7.81	-2.13	1.51e-05	0.0002	WDR5B	WD repeat domain 5B	Coding
TC0100008897.hg.1	7.21	5.39	3.53	0.0001	0.0013	WDR63	WD repeat domain 63	Multiple_Complex
TC0100015273.hg.1	10.1	8.96	2.21	6.67e-05	0.0007	WDR77	WD repeat domain 77	Multiple_Complex
TC1100006815.hg.1	7.44	4.67	6.84	1.85e-16	2.21e-14	WEE1	WEE1 G2 checkpoint kinase	Multiple_Complex
TC1100007940.hg.1	11.51	12.64	-2.19	2.58e-06	4.18e-05	VEGFB	vascular endothelial growth factor B	Multiple_Complex
TC1500008100.hg.1	8.89	10.87	-3.96	4.07e-14	3.35e-12	WHAMM	WAS protein homolog associated with actin, golgi membranes and microtubules	Multiple_Complex
TC1500010658.hg.1	8.19	6.25	3.84	4.39e-18	7.08e-16	VIMP	VCP-interacting membrane selenoprotein	Multiple_Complex
TC1700011561.hg.1	8.01	5.92	4.25	9.36e-10	3.42e-08	WIPI1	WD repeat domain, phosphoinositide interacting 1	Multiple_Complex
TC0300007161.hg.1	5.5	7.03	-2.9	4.98e-07	9.67e-06	VIPR1	vasoactive intestinal peptide receptor 1	Multiple_Complex
TC0900006481.hg.1	6.17	4.95	2.32	0.0002	0.002	VLDLR	very low density lipoprotein receptor	Multiple_Complex
TC1200006450.hg.1	11.77	10.65	2.17	0.0008	0.0061	WNK1	WNK lysine deficient protein kinase 1	Multiple_Complex
TC0600013205.hg.1	7.53	9.24	-3.25	5.05e-05	0.0006	VNN2	vanin 2	Multiple_Complex
TSUnmapped00000291.hg.1	5.01	6.09	-2.11	3.56e-06	5.56e-05	VPS11	VPS11, CORVET/HOPS core subunit [Source:HGNC Symbol;Acc:HGNC:14583]	Coding
TC0200007664.hg.1	8.66	7.26	2.65	1.38e-07	3.08e-06	VRK2	vaccinia related kinase 2	Multiple_Complex
TC1200012105.hg.1	11.17	9.62	2.93	1.35e-11	7.11e-10	WSB2	WD repeat and SOCS box containing 2	Multiple_Complex
TC0X00008080.hg.1	5.73	10.84	-34.36	3.61e-32	5.95e-29	VSIG1	V-set and immunoglobulin domain containing 1	Multiple_Complex
TC1100009374.hg.1	4.93	6.12	-2.29	1.78e-06	3.02e-05	VWA5A	von Willebrand factor A domain containing 5A	Multiple_Complex
TC0X00006590.hg.1	9	7.92	2.11	1.67e-06	2.84e-05	WWC3	WWC family member 3	Multiple_Complex
TC0100010532.hg.1	14.92	4.9	1037.32	1.62e-39	1.16e-35	XCL1	chemokine (C motif) ligand 1	Coding
TC0100016337.hg.1	15.1	5.08	1036.73	5.05e-41	5.41e-37	XCL2	chemokine (C motif) ligand 2	Coding
TC0300010358.hg.1	11.06	12.29	-2.34	0.0004	0.0033	XPC	xeroderma pigmentosum, complementation group C	Multiple_Complex
TC1300008267.hg.1	5.62	6.72	-2.15	0.0007	0.0057	XPO4	exportin 4	Multiple_Complex
TC1200007906.hg.1	9.32	10.98	-3.16	2.33e-09	7.83e-08	XRCC6BP1	XRCC6 binding protein 1	Multiple_Complex
TC1600009580.hg.1	6.01	7.05	-2.06	0.0013	0.0097	XYLT1	xylosyltransferase I	Multiple_Complex
TC0100013630.hg.1	7.98	6.55	2.7	0.0039	0.024	YARS	Transcript Identified by AceView, Entrez Gene ID(s) 8565	Unassigned
TC0100013629.hg.1	12.34	10.7	3.11	2.99e-13	2.09e-11	YARS	tyrosyl-tRNA synthetase	Multiple_Complex
TC2100007462.hg.1	7.84	9.25	-2.67	1.64e-05	0.0002	YBEY	ybeY metallopeptidase (putative)	Multiple_Complex
TC1200008134.hg.1	6.83	7.96	-2.18	0.0002	0.0017	YEATS4	YEATS domain containing 4	Multiple_Complex
TC1800007868.hg.1	6.01	4.87	2.2	3.47e-05	0.0004	YES1	YES proto-oncogene 1, Src family tyrosine kinase	Multiple_Complex
TC1100011280.hg.1	8.45	6.86	3	1.22e-07	2.75e-06	YIF1A	Yip1 interacting factor homolog A (S. cerevisiae)	Multiple_Complex
TC0700007374.hg.1	8.21	6.83	2.59	3.94e-06	6.1e-05	YKT6	YKT6 v-SNARE homolog (S. cerevisiae)	Multiple_Complex
TC1700008455.hg.1	7.9	9.57	-3.18	2.29e-11	1.16e-09	YPEL2	yippee like 2	Multiple_Complex
TC1600009952.hg.1	8.54	9.57	-2.05	0.0004	0.0038	YPEL3	yippee like 3	Multiple_Complex
TC1100010903.hg.1	4.68	7.42	-6.67	5.34e-12	3.01e-10	YPEL4	yippee like 4	Multiple_Complex
TC2200007114.hg.1	13.39	11.87	2.86	2.06e-06	3.44e-05	YWHAH	tyrosine 3-monooxygenase/tryptophan 5-monooxygenase activation protein, eta	Multiple_Complex
TC0200011690.hg.1	14.05	12.66	2.63	2.55e-10	1.05e-08	YWHAQ	tyrosine 3-monooxygenase/tryptophan 5-monooxygenase activation protein, theta	Multiple_Complex

## Sheet: CMVvsMEM
ID	CMV Avg (log2)	MEM Avg (log2)	Fold Change	P-val	FDR P-val	Gene Symbol	Description	Group
TC1200011177.hg.1	15.95	8.12	227.97	1.27e-20	1.81e-17	IFNG	interferon, gamma	Multiple_Complex
TC0100012734.hg.1	18.38	10.56	225.26	1.6e-23	4.9e-20	TNFRSF9	tumor necrosis factor receptor superfamily, member 9	Coding
TC1000010768.hg.1	13.94	6.62	160.06	2.26e-24	9.68e-21	EGR2	early growth response 2	Multiple_Complex
TC1700010459.hg.1	13.24	6.16	135.45	1.16e-24	6.21e-21	CCL3	chemokine (C-C motif) ligand 3	Multiple_Complex
TC0100010532.hg.1	14.92	8.34	95.82	2.91e-27	6.24e-23	XCL1	chemokine (C motif) ligand 1	Coding
TC0100016337.hg.1	15.1	9	68.31	1.49e-26	1.6e-22	XCL2	chemokine (C motif) ligand 2	Coding
TC1000009691.hg.1	15.39	10.01	41.77	1.85e-21	3.6e-18	IL2RA	interleukin 2 receptor, alpha	Coding
TC1100012708.hg.1	10.73	5.38	40.84	6.51e-20	8.72e-17	FEZ1	fasciculation and elongation protein zeta 1	Multiple_Complex
TC0900008219.hg.1	10.44	5.35	34.02	1.13e-16	7.31e-14	NR4A3	nuclear receptor subfamily 4, group A, member 3	Multiple_Complex
TC1700007620.hg.1	14.15	9.08	33.73	1.92e-22	5.14e-19	CCL4L2; CCL4; CCL4L1	chemokine (C-C motif) ligand 4-like 2; chemokine (C-C motif) ligand 4; chemokine (C-C motif) ligand 4-like 1	Multiple_Complex
TC1100009334.hg.1	12.69	8.02	25.6	7.9e-21	1.21e-17	CRTAM	cytotoxic and regulatory T-cell molecule	Multiple_Complex
TC1700007626.hg.1	12.15	7.52	24.73	4.08e-18	3.5e-15	CCL4L2; CCL4L1	chemokine (C-C motif) ligand 4-like 2; chemokine (C-C motif) ligand 4-like 1	Multiple_Complex
TC0200016649.hg.1	9.78	5.33	21.84	5.08e-05	0.0008	CDC42EP3	CDC42 effector protein (Rho GTPase binding) 3	NonCoding
TC0100016631.hg.1	10.07	5.74	20.05	6.51e-24	2.33e-20	RGS16	regulator of G-protein signaling 16	Coding
TC1200007653.hg.1	10.44	6.21	18.74	3.77e-18	3.37e-15	NR4A1	nuclear receptor subfamily 4, group A, member 1	Multiple_Complex
TC0900008949.hg.1	10.44	6.3	17.61	6.66e-18	5.1e-15	NCS1	neuronal calcium sensor 1	Multiple_Complex
TC0100017258.hg.1	12.56	8.92	12.44	9.82e-20	1.17e-16	BATF3	basic leucine zipper transcription factor, ATF-like 3	Multiple_Complex
TC1400010195.hg.1	14.55	10.94	12.16	1.28e-19	1.44e-16	WARS	tryptophanyl-tRNA synthetase	Multiple_Complex
TC0100012453.hg.1	11.89	8.31	11.96	3.74e-14	1.25e-11	TNFRSF4	tumor necrosis factor receptor superfamily, member 4	Multiple_Complex
TC0600007596.hg.1	9.65	6.21	10.89	4.49e-17	3.01e-14	TNF	tumor necrosis factor	Multiple_Complex
TC0100012452.hg.1	9.95	6.51	10.85	5.13e-16	2.77e-13	TNFRSF18	tumor necrosis factor receptor superfamily, member 18	Coding
TC1100010987.hg.1	12.91	9.52	10.43	8.03e-20	1.01e-16	FABP5	fatty acid binding protein 5 (psoriasis-associated)	Multiple_Complex
TC1500010184.hg.1	13.3	9.95	10.15	2.47e-18	2.3e-15	BCL2A1	BCL2-related protein A1	Coding
TC0600007012.hg.1	10.38	7.05	10.02	1.13e-17	8.08e-15	CD83	CD83 molecule	Multiple_Complex
TC0600006442.hg.1	13.99	10.81	9.08	3.02e-15	1.32e-12	IRF4	interferon regulatory factor 4	Multiple_Complex
TC1700010461.hg.1	9.45	6.32	8.7	8.12e-13	1.83e-10	CCL3L3; CCL3L1	chemokine (C-C motif) ligand 3-like 3; chemokine (C-C motif) ligand 3-like 1	Multiple_Complex
TC0800008080.hg.1	12.82	9.74	8.43	4.71e-14	1.51e-11	FABP5	fatty acid binding protein 5 (psoriasis-associated)	Multiple_Complex
TC0100017834.hg.1	7.3	4.23	8.39	8.81e-18	6.51e-15	GNG4	guanine nucleotide binding protein (G protein), gamma 4	Multiple_Complex
TC0700012182.hg.1	10.3	7.24	8.3	1.21e-12	2.62e-10	NAMPT	nicotinamide phosphoribosyltransferase	Multiple_Complex
TC1300007592.hg.1	8.68	5.65	8.17	7.37e-22	1.76e-18	NDFIP2	Nedd4 family interacting protein 2	Multiple_Complex
TC1200008474.hg.1	9.3	6.29	8.01	4.49e-12	8.45e-10	SOCS2	suppressor of cytokine signaling 2	Coding
TC1500010018.hg.1	9.2	6.29	7.51	8.49e-22	1.82e-18	SEMA7A	semaphorin 7A, GPI membrane anchor (John Milton Hagen blood group)	Multiple_Complex
TC2000008815.hg.1	9.9	7	7.5	3.52e-19	3.59e-16	BCL2L1	BCL2-like 1	Multiple_Complex
TC0300008467.hg.1	7.61	4.77	7.13	1.87e-11	2.97e-09	ARHGAP31	Rho GTPase activating protein 31	Multiple_Complex
TC0500008620.hg.1	7.46	4.66	6.97	3.79e-21	6.25e-18	CSF2	colony stimulating factor 2 (granulocyte-macrophage)	Coding
TC1900011004.hg.1	11.21	8.44	6.84	6.15e-18	4.88e-15	SLC1A5	solute carrier family 1 (neutral amino acid transporter), member 5	Multiple_Complex
TC0500012937.hg.1	11.62	8.87	6.77	1.97e-16	1.18e-13	NOP16	NOP16 nucleolar protein	Multiple_Complex
TC1200011470.hg.1	10.12	7.45	6.36	3.69e-09	3.12e-07	DUSP6	dual specificity phosphatase 6	Multiple_Complex
TC1000008643.hg.1	11.67	9.03	6.23	2.37e-15	1.06e-12	SCD	stearoyl-CoA desaturase (delta-9-desaturase)	Multiple_Complex
TC1600011186.hg.1	12.01	9.42	5.99	3.33e-06	9.36e-05	SLC7A5	solute carrier family 7 (amino acid transporter light chain, L system), member 5	Multiple_Complex
TC1400008764.hg.1	13.61	11.03	5.98	4.92e-12	9.09e-10	GZMB	granzyme B	Coding
TC0800008845.hg.1	10.49	7.91	5.98	1.02e-11	1.72e-09	MYC	v-myc avian myelocytomatosis viral oncogene homolog	Multiple_Complex
TC0100009364.hg.1	12.03	9.46	5.93	7.59e-09	5.75e-07	CSF1	colony stimulating factor 1 (macrophage)	Multiple_Complex
TC1000008891.hg.1	11.42	8.87	5.84	2.68e-12	5.22e-10	DUSP5	dual specificity phosphatase 5	Multiple_Complex
TC0200014672.hg.1	10.63	8.09	5.84	7.11e-05	0.0011	NR4A2	nuclear receptor subfamily 4, group A, member 2	Multiple_Complex
TC0600007595.hg.1	8.63	6.09	5.81	4.59e-18	3.79e-15	LTA	lymphotoxin alpha	Multiple_Complex
TC0900010769.hg.1	11.68	9.21	5.54	1.54e-12	3.17e-10	NFIL3	nuclear factor, interleukin 3 regulated	Coding
TC1900011414.hg.1	8.36	6	5.13	1.6e-08	1.09e-06	LAIR1	leukocyte-associated immunoglobulin-like receptor 1	Multiple_Complex
TC0700009977.hg.1	5.79	3.49	4.91	6.57e-14	2.02e-11	PDGFA	platelet-derived growth factor alpha polypeptide	Multiple_Complex
TC0900006559.hg.1	9.94	7.65	4.9	1.16e-13	3.24e-11	CD274	CD274 molecule	Multiple_Complex
TC1400008940.hg.1	12.51	10.22	4.88	1.41e-12	3e-10	NFKBIA	nuclear factor of kappa light polypeptide gene enhancer in B-cells inhibitor, alpha	Multiple_Complex
TC0500008437.hg.1	11.43	9.16	4.8	1.61e-11	2.59e-09	TNFAIP8	tumor necrosis factor, alpha-induced protein 8	Multiple_Complex
TC1100007394.hg.1	9.54	7.37	4.52	4.71e-09	3.83e-07	CD82	CD82 molecule	Multiple_Complex
TC1900010502.hg.1	8.05	5.9	4.44	4.08e-09	3.4e-07	NFKBID	nuclear factor of kappa light polypeptide gene enhancer in B-cells inhibitor, delta	Multiple_Complex
TC1800007471.hg.1	7.63	5.48	4.43	1.99e-07	9.09e-06	PMAIP1	phorbol-12-myristate-13-acetate-induced protein 1	Multiple_Complex
TC1500010723.hg.1	7.56	5.41	4.42	1.05e-13	3e-11	CHAC1	ChaC glutathione-specific gamma-glutamylcyclotransferase 1	Multiple_Complex
TC0100008653.hg.1	10.6	8.45	4.42	1.54e-06	4.89e-05	IL12RB2	interleukin 12 receptor, beta 2	Multiple_Complex
TC1300008487.hg.1	11.03	8.89	4.42	1.32e-15	6.17e-13	SLC7A1	solute carrier family 7 (cationic amino acid transporter, y+ system), member 1	Multiple_Complex
TC0200015463.hg.1	7.92	5.78	4.41	1.38e-09	1.36e-07	WDR12	WD repeat domain 12	Multiple_Complex
TC0100014014.hg.1	13.5	11.36	4.39	1.27e-14	4.69e-12	PRDX1	peroxiredoxin 1	Multiple_Complex
TC0700011785.hg.1	10.52	8.4	4.33	5.71e-15	2.35e-12	CDK6	cyclin-dependent kinase 6	Multiple_Complex
TC1200007866.hg.1	11.15	9.04	4.33	5.17e-16	2.77e-13	SHMT2	serine hydroxymethyltransferase 2 (mitochondrial)	Multiple_Complex
TC1500008335.hg.1	10.32	8.21	4.3	1.2e-06	3.93e-05	FURIN	furin (paired basic amino acid cleaving enzyme)	Multiple_Complex
TC1600009966.hg.1	9.48	7.38	4.28	3.94e-14	1.3e-11	DCTPP1	dCTP pyrophosphatase 1	Multiple_Complex
TC0500008642.hg.1	5.75	3.65	4.28	6.54e-12	1.16e-09	IL13	interleukin 13	Multiple_Complex
TC1200010559.hg.1	9.76	7.67	4.25	3.48e-15	1.46e-12	VDR	vitamin D (1,25- dihydroxyvitamin D3) receptor	Multiple_Complex
TC0400008271.hg.1	9.7	7.64	4.17	8.1e-13	1.83e-10	NFKB1	nuclear factor of kappa light polypeptide gene enhancer in B-cells 1	Multiple_Complex
TC0300009016.hg.1	11.08	9.04	4.11	1.89e-09	1.77e-07	ATP1B3	ATPase, Na+/K+ transporting, beta 3 polypeptide	Multiple_Complex
TC0200010980.hg.1	8.04	6	4.11	0.0003	0.0039	CCL20	chemokine (C-C motif) ligand 20	Multiple_Complex
TC0800012202.hg.1	8.31	6.29	4.05	9.9e-09	7.18e-07	BOP1; MIR7112	block of proliferation 1; microRNA 7112	Multiple_Complex
TC1900011929.hg.1	11.56	9.55	4.03	1.64e-08	1.11e-06	IGFLR1	IGF like family receptor 1	Multiple_Complex
TC0100014276.hg.1	9.16	7.17	3.99	2.21e-08	1.41e-06	DHCR24	24-dehydrocholesterol reductase	Multiple_Complex
TC0600013231.hg.1	7.92	5.92	3.99	2.17e-07	9.78e-06	SGK1	serum/glucocorticoid regulated kinase 1	Multiple_Complex
TC0700007610.hg.1	9.11	7.12	3.98	5.73e-06	0.0001	LANCL2	LanC lantibiotic synthetase component C-like 2 (bacterial)	Multiple_Complex
TC0100006729.hg.1	16.72	14.73	3.95	1.39e-15	6.36e-13	PARK7	parkinson protein 7	Multiple_Complex
TC2200006641.hg.1	9.77	7.8	3.91	1e-15	5.09e-13	RANBP1	RAN binding protein 1	Multiple_Complex
TC2000009204.hg.1	10.94	8.98	3.88	1.42e-13	3.81e-11	TOMM34	translocase of outer mitochondrial membrane 34	Multiple_Complex
TC0700008857.hg.1	9.73	7.78	3.85	3.1e-07	1.31e-05	MDFIC	MyoD family inhibitor domain containing	Multiple_Complex
TC0700013584.hg.1	10.42	8.48	3.82	2.1e-11	3.31e-09	CYP51A1	cytochrome P450, family 51, subfamily A, polypeptide 1	Multiple_Complex
TC2000009218.hg.1	7.75	5.81	3.82	6.38e-12	1.14e-09	SDC4	syndecan 4	Multiple_Complex
TC0600009710.hg.1	11.82	9.89	3.81	4.9e-11	7.06e-09	STX11	syntaxin 11	Coding
TC0300013911.hg.1	12.11	10.2	3.77	1.89e-08	1.24e-06	DNAJB11	DnaJ (Hsp40) homolog, subfamily B, member 11	Multiple_Complex
TC1700008282.hg.1	13.65	11.74	3.76	1.21e-10	1.55e-08	NME1; NME1-NME2; NME2	NME/NM23 nucleoside diphosphate kinase 1; NME1-NME2 readthrough; NME/NM23 nucleoside diphosphate kinase 2	Multiple_Complex
TC1200011310.hg.1	10.87	8.96	3.73	1.1e-14	4.15e-12	PHLDA1	pleckstrin homology-like domain, family A, member 1	Multiple_Complex
TC0700013500.hg.1	9.06	7.17	3.72	5.22e-08	3e-06	ADAP1	ArfGAP with dual PH domains 1	Multiple_Complex
TC0400012956.hg.1	7.53	5.65	3.68	6.54e-08	3.57e-06	ELOVL6	ELOVL fatty acid elongase 6	Multiple_Complex
TC0100011533.hg.1	6.78	4.91	3.67	1.82e-10	2.23e-08	ATF3	activating transcription factor 3	Multiple_Complex
TC0300011988.hg.1	10.02	8.14	3.66	0.001	0.0089	GCSAM	germinal center-associated, signaling and motility	Coding
TC0800010002.hg.1	12.87	11.02	3.62	1.75e-05	0.0004	DUSP4	dual specificity phosphatase 4	Multiple_Complex
TC0600008006.hg.1	9.63	7.77	3.62	1.17e-08	8.28e-07	FOXP4; MIR4641	forkhead box P4; microRNA 4641	Multiple_Complex
TC0100018315.hg.1	10.11	8.26	3.62	1.92e-12	3.79e-10	UCK2; MIR3658	uridine-cytidine kinase 2; microRNA 3658	Multiple_Complex
TC1000011658.hg.1	9.62	7.76	3.61	1.92e-12	3.79e-10	NPM3	nucleophosmin/nucleoplasmin 3	Multiple_Complex
TC0500006730.hg.1	14.45	12.62	3.57	8.38e-15	3.21e-12	CCT5	chaperonin containing TCP1, subunit 5 (epsilon)	Multiple_Complex
TC0700010509.hg.1	12.92	11.1	3.53	1.7e-12	3.43e-10	CYCS	cytochrome c, somatic	Coding
TC2200006718.hg.1	10.63	8.82	3.51	5.41e-06	0.0001	SDF2L1	stromal cell-derived factor 2-like 1	Multiple_Complex
TC1700008719.hg.1	9.95	8.15	3.47	3.17e-12	6.06e-10	KPNA2	karyopherin alpha 2 (RAG cohort 1, importin alpha 1)	Multiple_Complex
TC0900007667.hg.1	8.55	6.75	3.47	1.74e-12	3.49e-10	PSAT1	phosphoserine aminotransferase 1	Multiple_Complex
TC1100007935.hg.1	12.38	10.6	3.44	2.16e-21	3.85e-18	STIP1	stress-induced phosphoprotein 1	Multiple_Complex
TC0700008090.hg.1	10.17	8.4	3.39	1.12e-08	8.01e-07	HSPB1	heat shock 27kDa protein 1	Multiple_Complex
TC0400008424.hg.1	9.23	7.48	3.38	7.01e-05	0.0011	C4orf32	chromosome 4 open reading frame 32	Coding
TC0300011124.hg.1	10.62	8.87	3.36	0.0003	0.0037	CISH	cytokine inducible SH2-containing protein	Multiple_Complex
TC0800008783.hg.1	8.86	7.13	3.32	2.76e-08	1.71e-06	SQLE	squalene epoxidase	Multiple_Complex
TC0X00008712.hg.1	7	5.27	3.3	1.67e-08	1.12e-06	MAMLD1	mastermind-like domain containing 1	Multiple_Complex
TC2000009604.hg.1	11.36	9.64	3.29	0.0002	0.0026	PMEPA1	prostate transmembrane protein, androgen induced 1	Multiple_Complex
TC1000007936.hg.1	7.97	6.26	3.27	7.94e-09	5.95e-07	SGPL1	sphingosine-1-phosphate lyase 1	Multiple_Complex
TC1000010925.hg.1	13.66	11.96	3.25	0.0003	0.0038	PRF1	perforin 1 (pore forming protein)	Multiple_Complex
TC0200016452.hg.1	13.62	11.93	3.23	2.3e-07	1.02e-05	REL	v-rel avian reticuloendotheliosis viral oncogene homolog	Multiple_Complex
TC0600014196.hg.1	12.71	11.03	3.21	2.59e-06	7.67e-05	SNX9	sorting nexin 9	Multiple_Complex
TSUnmapped00000077.hg.1	9.59	7.92	3.2	1.64e-12	3.36e-10	HMBS	hydroxymethylbilane synthase	Coding
TC0100010152.hg.1	8.27	6.59	3.2	1.36e-05	0.0003	LMNA	lamin A/C	Multiple_Complex
TC1700006644.hg.1	13.14	11.46	3.2	5.61e-10	6.24e-08	PSMB6	proteasome subunit beta 6	Multiple_Complex
TC0100018403.hg.1	6.83	5.15	3.19	1.48e-08	1.02e-06	ERRFI1	ERBB receptor feedback inhibitor 1	Multiple_Complex
TC0700007098.hg.1	13.98	12.31	3.19	1.46e-12	3.08e-10	GARS	glycyl-tRNA synthetase	Multiple_Complex
TC0600008129.hg.1	16.73	15.05	3.19	1.81e-25	1.3e-21	HSP90AB1	heat shock protein 90kDa alpha (cytosolic), class B member 1	Multiple_Complex
TC1300008533.hg.1	13.19	11.53	3.18	9.68e-07	3.34e-05	HSPH1	heat shock 105kDa/110kDa protein 1	Multiple_Complex
TC2000008845.hg.1	11.51	9.84	3.18	5.53e-12	1.01e-09	PLAGL2	pleiomorphic adenoma gene-like 2	Coding
TC1700011233.hg.1	8.24	6.58	3.17	2.14e-07	9.7e-06	MRPS23	mitochondrial ribosomal protein S23	Multiple_Complex
TC0100007160.hg.1	6.87	5.21	3.16	1.51e-12	3.15e-10	MRTO4	MRT4 homolog, ribosome maturation factor	Multiple_Complex
TC1200012624.hg.1	13.43	11.78	3.16	8.22e-14	2.41e-11	TUBA1C	tubulin, alpha 1c	Multiple_Complex
TC0600011733.hg.1	5.71	4.07	3.13	3.39e-15	1.45e-12	KCNK5	potassium channel, two pore domain subfamily K, member 5	Multiple_Complex
TC0200015838.hg.1	10.84	9.2	3.12	2.84e-14	9.84e-12	FARSB	phenylalanyl-tRNA synthetase beta subunit	Multiple_Complex
TC0500012238.hg.1	7.78	6.13	3.12	5.76e-09	4.52e-07	HBEGF	heparin-binding EGF-like growth factor	Multiple_Complex
TC1100006966.hg.1	7.8	6.15	3.12	2.41e-06	7.19e-05	NCR3LG1	natural killer cell cytotoxicity receptor 3 ligand 1	Multiple_Complex
TC1800006748.hg.1	8.63	6.99	3.11	7.89e-10	8.34e-08	SEH1L	SEH1-like nucleoporin	Multiple_Complex
TC1200006788.hg.1	13.48	11.84	3.1	0.0001	0.0015	KLRD1	killer cell lectin-like receptor subfamily D, member 1	Multiple_Complex
TC2200009274.hg.1	13.95	12.34	3.06	3.12e-07	1.32e-05	APOBEC3G	apolipoprotein B mRNA editing enzyme, catalytic polypeptide-like 3G	Multiple_Complex
TC0100008664.hg.1	8.79	7.17	3.06	5.14e-07	1.98e-05	GADD45A	growth arrest and DNA-damage-inducible, alpha	Multiple_Complex
TC0600006926.hg.1	9.15	7.55	3.05	2.21e-07	9.86e-06	PAK1IP1	PAK1 interacting protein 1	Multiple_Complex
TC1100011259.hg.1	6.8	5.2	3.03	2.69e-09	2.4e-07	FOSL1	FOS-like antigen 1	Multiple_Complex
TC1200006555.hg.1	14.79	13.2	3.01	5.45e-10	6.15e-08	CCND2	cyclin D2	Multiple_Complex
TC2200008832.hg.1	11.56	9.98	3.01	1.42e-13	3.81e-11	DESI1	desumoylating isopeptidase 1	Multiple_Complex
TC0X00008862.hg.1	11.27	9.68	3.01	4.48e-11	6.54e-09	FUNDC2	FUN14 domain containing 2	Multiple_Complex
TC1700006772.hg.1	12.63	11.04	3	1.97e-08	1.29e-06	KDM6B	lysine (K)-specific demethylase 6B	Multiple_Complex
TC1600007957.hg.1	12.03	10.44	3	0.0002	0.0027	MT2A	metallothionein 2A	Multiple_Complex
TC0600009851.hg.1	6.66	5.08	3	3.83e-09	3.24e-07	MTHFD1L	methylenetetrahydrofolate dehydrogenase (NADP+ dependent) 1-like	Multiple_Complex
TC2000008001.hg.1	11.76	10.18	2.99	3.13e-07	1.32e-05	ADRM1	adhesion regulating molecule 1	Multiple_Complex
TC1400007712.hg.1	12.38	10.8	2.99	7.88e-09	5.93e-07	BATF	basic leucine zipper transcription factor, ATF-like	Multiple_Complex
TC0800008801.hg.1	6.89	5.31	2.99	1.82e-10	2.23e-08	TRIB1	tribbles pseudokinase 1	Multiple_Complex
TC1500006972.hg.1	7.97	6.39	2.98	1.37e-07	6.67e-06	SPINT1	serine peptidase inhibitor, Kunitz type 1	Multiple_Complex
TC1600011358.hg.1	8.2	6.63	2.97	9.49e-05	0.0014	C16orf45	chromosome 16 open reading frame 45	Multiple_Complex
TC0100015994.hg.1	11.08	9.52	2.97	1.04e-13	3e-11	CCT3	chaperonin containing TCP1, subunit 3 (gamma)	Multiple_Complex
TC1100009707.hg.1	11.64	10.07	2.96	6.84e-06	0.0002	POLR2L	polymerase (RNA) II (DNA directed) polypeptide L, 7.6kDa	Coding
TC0700006984.hg.1	8.44	6.87	2.96	2.65e-11	4.03e-09	SNX10	sorting nexin 10	Multiple_Complex
TC1100013042.hg.1	7.86	6.29	2.96	4.66e-07	1.83e-05	SSSCA1	Sjogren syndrome/scleroderma autoantigen 1	Multiple_Complex
TC0300006483.hg.1	14.33	12.78	2.93	2.41e-08	1.53e-06	BHLHE40	basic helix-loop-helix family, member e40	Multiple_Complex
TC0500007542.hg.1	10.38	8.84	2.92	1.25e-08	8.82e-07	NDUFAF2	NADH dehydrogenase (ubiquinone) complex I, assembly factor 2	Multiple_Complex
TC1800009221.hg.1	7.25	5.72	2.88	6.29e-06	0.0002	RBBP8; MIR4741	retinoblastoma binding protein 8; microRNA 4741	Multiple_Complex
TC0800009856.hg.1	5.92	4.4	2.87	0.0015	0.012	EGR3	early growth response 3	Multiple_Complex
TC1800006448.hg.1	7.73	6.21	2.87	9.73e-08	4.93e-06	TYMS	thymidylate synthetase	Multiple_Complex
TC0700010504.hg.1	9.45	7.94	2.86	5.97e-06	0.0002	OSBPL3	oxysterol binding protein-like 3	Multiple_Complex
TC0500012587.hg.1	5.95	4.44	2.85	2.73e-06	7.99e-05	TIMD4	T-cell immunoglobulin and mucin domain containing 4	Coding
TC1700008178.hg.1	10.27	8.76	2.84	8.91e-10	9.23e-08	ATP5G1	ATP synthase, H+ transporting, mitochondrial Fo complex subunit C1 (subunit 9)	Multiple_Complex
TSUnmapped00000307.hg.1	9.73	8.23	2.82	6.25e-11	8.65e-09	HMBS	hydroxymethylbilane synthase	Coding
TC1800006834.hg.1	11.45	9.95	2.82	1.48e-07	7.1e-06	SNRPD1	small nuclear ribonucleoprotein D1 polypeptide	Multiple_Complex
TC0200009065.hg.1	13.24	11.75	2.81	3.64e-08	2.16e-06	DBI	diazepam binding inhibitor (GABA receptor modulator, acyl-CoA binding protein)	Multiple_Complex
TC0100016021.hg.1	10.17	8.68	2.81	2.27e-07	1.01e-05	MRPL24	mitochondrial ribosomal protein L24	Multiple_Complex
TC0300010424.hg.1	10.14	8.66	2.8	2.65e-10	3.17e-08	DPH3	diphthamide biosynthesis 3	Multiple_Complex
TC0X00006794.hg.1	9.81	8.32	2.8	2.27e-11	3.53e-09	PRDX4	peroxiredoxin 4	Multiple_Complex
TC0700010910.hg.1	9.15	7.68	2.78	3.49e-07	1.43e-05	POLD2	polymerase (DNA directed), delta 2, accessory subunit	Multiple_Complex
TC0200016607.hg.1	11.51	10.04	2.78	2.18e-09	2e-07	UBE2F	ubiquitin-conjugating enzyme E2F (putative)	Multiple_Complex
TC0100016356.hg.1	7.81	6.34	2.77	0.0005	0.0051	F5	coagulation factor V (proaccelerin, labile factor)	Multiple_Complex
TC0100013873.hg.1	7.9	6.43	2.77	1.96e-07	9e-06	HIVEP3	human immunodeficiency virus type I enhancer binding protein 3	Multiple_Complex
TC0900011177.hg.1	16.47	15	2.76	1.07e-09	1.09e-07	TXN	thioredoxin	Multiple_Complex
TC0700006795.hg.1	13.21	11.74	2.75	1.86e-05	0.0004	AHR	aryl hydrocarbon receptor	Multiple_Complex
TC1700006758.hg.1	8.77	7.31	2.75	3.05e-06	8.75e-05	MPDU1	mannose-P-dolichol utilization defect 1	Multiple_Complex
TC1200009416.hg.1	14.95	13.49	2.75	2.2e-09	2.01e-07	RAN	RAN, member RAS oncogene family	Multiple_Complex
TC0200013095.hg.1	10.72	9.27	2.73	4.67e-08	2.75e-06	BOLA3	bolA family member 3	Multiple_Complex
TC1500007196.hg.1	7.08	5.63	2.73	1.92e-05	0.0004	SLC27A2	solute carrier family 27 (fatty acid transporter), member 2	Multiple_Complex
TC1700006702.hg.1	12.61	11.17	2.71	4.65e-08	2.75e-06	TXNDC17	thioredoxin domain containing 17	Multiple_Complex
TC0700013362.hg.1	9.95	8.52	2.7	6.68e-08	3.62e-06	MRPS17	mitochondrial ribosomal protein S17	Multiple_Complex
TC1700010327.hg.1	7.53	6.1	2.69	8.03e-09	6e-07	COPRS	coordinator of PRMT5, differentiation stimulator	Multiple_Complex
TC1900009357.hg.1	8.33	6.9	2.69	6.94e-06	0.0002	MYDGF	myeloid-derived growth factor	Multiple_Complex
TC0400009953.hg.1	6.83	5.4	2.68	0.0005	0.0052	AFAP1	actin filament associated protein 1	Multiple_Complex
TC1100007941.hg.1	8.71	7.29	2.68	0.0001	0.0016	FKBP2	FK506 binding protein 2	Multiple_Complex
TC1900007012.hg.1	8.6	7.18	2.68	0.0007	0.0069	LDLR; MIR6886	low density lipoprotein receptor; microRNA 6886	Multiple_Complex
TC0800012432.hg.1	10.3	8.87	2.68	2.38e-08	1.52e-06	MRPS28	mitochondrial ribosomal protein S28	Multiple_Complex
TC1700012484.hg.1	6.05	4.63	2.68	1.21e-13	3.32e-11	PYCR1	pyrroline-5-carboxylate reductase 1	Multiple_Complex
TC1700012341.hg.1	10.23	8.82	2.67	1.51e-09	1.46e-07	C1QBP	complement component 1, q subcomponent binding protein	Multiple_Complex
TC1900008020.hg.1	13.06	11.65	2.66	5.49e-05	0.0009	ACTN4	actinin, alpha 4	Multiple_Complex
TC0200016584.hg.1	15.51	14.11	2.64	1.01e-09	1.03e-07	HSPE1	heat shock 10kDa protein 1	Multiple_Complex
TC0600011674.hg.1	7.93	6.53	2.64	2.2e-07	9.85e-06	PPIL1	peptidylprolyl isomerase (cyclophilin)-like 1	Multiple_Complex
TC2200007495.hg.1	13.73	12.34	2.63	1.05e-05	0.0002	SREBF2	sterol regulatory element binding transcription factor 2	Multiple_Complex
TC0300013874.hg.1	10.29	8.89	2.63	2.23e-06	6.7e-05	SRPRB	signal recognition particle receptor, B subunit	Multiple_Complex
TC0100018435.hg.1	8.95	7.56	2.62	1.32e-05	0.0003	EBNA1BP2; MIR6733	EBNA1 binding protein 2; microRNA 6733	Multiple_Complex
TC1700007718.hg.1	8.71	7.33	2.61	7.17e-10	7.65e-08	CISD3	CDGSH iron sulfur domain 3	Multiple_Complex
TC1600007521.hg.1	11.93	10.54	2.61	2.28e-07	1.02e-05	FUS	FUS RNA binding protein	Multiple_Complex
TC1700011045.hg.1	15.75	14.36	2.61	7.85e-10	8.33e-08	PHB	prohibitin	Multiple_Complex
TC1500009636.hg.1	10.66	9.28	2.6	5.78e-05	0.0009	ANXA2	annexin A2	Multiple_Complex
TC1200012815.hg.1	7.96	6.59	2.59	5.74e-08	3.22e-06	METTL1	methyltransferase like 1	Multiple_Complex
TC1900011840.hg.1	9.49	8.11	2.59	1.29e-05	0.0003	TIMM13	translocase of inner mitochondrial membrane 13 homolog (yeast)	Coding
TC0400009221.hg.1	12.53	11.16	2.58	5.5e-08	3.13e-06	MSMO1	methylsterol monooxygenase 1	Multiple_Complex
TC0900009404.hg.1	11.15	9.78	2.58	0.003	0.0202	PUM3	pumilio RNA binding family member 3	Multiple_Complex
TC0200007886.hg.1	7.86	6.49	2.57	1.35e-05	0.0003	PNO1	partner of NOB1 homolog	Multiple_Complex
TC1100012992.hg.1	7.38	6.02	2.56	3.02e-06	8.69e-05	HSD17B12	hydroxysteroid (17-beta) dehydrogenase 12	Multiple_Complex
TC0500011228.hg.1	9.77	8.42	2.54	7.33e-08	3.92e-06	ARSB	arylsulfatase B	Multiple_Complex
TC2000007169.hg.1	10.1	8.75	2.54	3.38e-09	2.91e-07	CHMP4B	charged multivesicular body protein 4B	Multiple_Complex
TC0500010599.hg.1	10	8.67	2.52	0.0003	0.0032	OXCT1	3-oxoacid CoA-transferase 1	Multiple_Complex
TC1100010175.hg.1	9.83	8.5	2.52	2.13e-07	9.64e-06	RRAS2	related RAS viral (r-ras) oncogene homolog 2	Multiple_Complex
TC0400010699.hg.1	9.45	8.12	2.52	2.44e-05	0.0005	SCFD2	sec1 family domain containing 2	Multiple_Complex
TC1900009394.hg.1	11.84	10.52	2.51	2.92e-07	1.25e-05	C19orf70	chromosome 19 open reading frame 70	Multiple_Complex
[truncated: 1,392 more rows]

## Sheet: CMVvsTEM
ID	CMV Avg (log2)	TEMRA Avg (log2)	Fold Change	P-val	FDR P-val	Gene Symbol	Description	Group
[truncated: 1,897 more rows]
