# Supplementary material for: Cytotoxic CD8+ Temra cells show loss of chromatin accessibility at genes associated with T cell activation
Source: Front Immunol. 2024 Feb 2;15:1285798. doi: 10.3389/fimmu.2024.1285798 (PMC10870784; doi:10.3389/fimmu.2024.1285798)
Supplement: Supplementary Table 3 — List of differentially accessible regions between CD8+ Temra and Tcm/em cells. [file Table_3.xlsx]

## Sheet: Galaxy902-(ChIPseeker_on_data_4
Chrom	Start	End	Name	Score	Strand	Conc	Conc_tem_CMVhigh	Conc_tem_CMVlow	Fold	p.value	FDR	annotation	geneChr	geneStart	geneEnd	geneLength	geneStrand	transcriptId	distanceToTSS	geneName	geneId
chr18	58043368	58045040	DiffBind	0	.	8.48	9.03	8.06	0.98	1.52e-05	0.045	Promoter (<=1kb)	18	58044226	58401539	357314	1	ENST00000400345.8	0	NEDD4L	ENSG00000049759.19
chr7	130938520	130939122	DiffBind	0	.	6.9	7.49	6.43	1.05	8.15e-06	0.0363	Promoter (2-3kb)	7	130936464	130939661	3198	1	ENST00000608412.1	2057	AC058791.1	ENSG00000273319.1
chr2	110657686	110658257	DiffBind	0	.	5.22	5.92	4.61	1.31	9.16e-06	0.037	Promoter (<=1kb)	2	110637832	110657621	19790	2	ENST00000671097.1	-66	BUB1	ENSG00000169679.15
chr18	58135209	58136135	DiffBind	0	.	5.02	5.73	4.4	1.33	2.43e-05	0.0499	Intron (ENST00000400345.8/ENSG00000049759.19, intron 1 of 30)	18	58149333	58396551	247219	1	ENST00000435432.6	-13198	NEDD4L	ENSG00000049759.19
chr3	183516039	183516757	DiffBind	0	.	6.22	6.94	5.58	1.35	8.51e-07	0.0166	Intron (ENST00000468734.1/ENSG00000172578.12, intron 2 of 7)	3	183520212	183544785	24574	2	ENST00000487643.1	28028	KLHL6	ENSG00000172578.12
chr9	92664478	92665138	DiffBind	0	.	6.35	7.1	5.67	1.43	1.98e-06	0.0206	Intron (ENST00000287996.8/ENSG00000127080.10, intron 1 of 12)	9	92613183	92670131	56949	2	ENST00000287996.8	4993	IPPK	ENSG00000127080.10
chr4	75654939	75656132	DiffBind	0	.	6.57	7.32	5.88	1.44	2e-05	0.0468	Promoter (<=1kb)	4	75648639	75654745	6107	2	ENST00000678642.1	-195	G3BP2	ENSG00000138757.15
chr3	129230455	129231035	DiffBind	0	.	4.62	5.38	3.93	1.44	7.97e-06	0.0363	Distal Intergenic	3	129218093	129218350	258	2	ENST00000464146.1	-12106	RPS27P12	ENSG00000241673.1
chr2	159920636	159920988	DiffBind	0	.	4.78	5.56	4.04	1.52	2.04e-05	0.0468	Distal Intergenic	2	159803355	159904756	101402	2	ENST00000263636.5	-15881	LY75	ENSG00000054219.11
chr1	23103328	23103863	DiffBind	0	.	6.1	6.88	5.35	1.53	2.45e-05	0.0499	Intron (ENST00000418342.5/ENSG00000169641.13, intron 2 of 3)	1	23020147	23088058	67912	2	ENST00000427154.1	-15271	AL031428.1	ENSG00000240553.1
chr1	234309944	234310512	DiffBind	0	.	5.9	6.71	5.13	1.59	8.91e-07	0.0166	Intron (ENST00000366618.8/ENSG00000183780.13, intron 4 of 7)	1	234306467	234306539	73	1	ENST00000583284.1	3478	MIR4671	ENSG00000264377.1
chr16	30767687	30768342	DiffBind	0	.	4.96	5.78	4.17	1.61	2.1e-05	0.0468	Promoter (<=1kb)	16	30767677	30768531	855	1	ENST00000564260.1	11	RNF40	ENSG00000103549.22
chr17	15944571	15945935	DiffBind	0	.	6.55	7.36	5.75	1.61	1.27e-05	0.0421	Promoter (<=1kb)	17	15944917	15975746	30830	1	ENST00000304222.2	0	ADORA2B	ENSG00000170425.3
chr16	90081787	90082803	DiffBind	0	.	6.01	6.84	5.18	1.66	6.09e-06	0.0361	Intron (ENST00000569206.1/ENSG00000126856.15, intron 3 of 3)	16	90057780	90077323	19544	2	ENST00000449207.7	-4465	PRDM7	ENSG00000126856.15
chr12	54173133	54173635	DiffBind	0	.	3.53	4.42	2.62	1.79	1.7e-05	0.045	Promoter (<=1kb)	12	54121277	54173229	51953	2	ENST00000634429.1	0	SMUG1	ENSG00000123415.15
chr5	87230963	87231411	DiffBind	0	.	3.82	4.7	2.91	1.79	2.31e-06	0.0206	Intron (ENST00000611331.1/ENSG00000288569.1, intron 1 of 1)	5	87216606	87239790	23185	2	ENST00000445770.3	8379	LINC01949	ENSG00000288569.1
chr8	80111678	80112129	DiffBind	0	.	4.29	5.21	3.3	1.91	1.3e-05	0.0421	Intron (ENST00000379096.9/ENSG00000076554.15, intron 1 of 5)	8	80122852	80127670	4819	1	ENST00000522494.1	-10723	AC009686.1	ENSG00000254205.1
chr5	131337222	131338055	DiffBind	0	.	5.37	6.29	4.37	1.92	2.08e-05	0.0468	Intron (ENST00000502840.5/ENSG00000158985.14, intron 3 of 3)	5	131385606	131398446	12841	1	ENST00000502582.1	-47551	CDC42SE2	ENSG00000158985.14
chr3	56930720	56931046	DiffBind	0	.	3.56	4.49	2.56	1.93	2.42e-05	0.0499	Intron (ENST00000338458.8/ENSG00000163947.12, intron 3 of 12)	3	56753494	56939907	186414	2	ENST00000498517.5	8861	ARHGEF3	ENSG00000163947.12
chr15	38686040	38686367	DiffBind	0	.	4.41	5.34	3.41	1.93	1.01e-05	0.037	Intron (ENST00000643648.1/ENSG00000175779.4, intron 4 of 4)	15	38696598	38700038	3441	1	ENST00000643127.1	-10231	LINC02694	ENSG00000175779.4
chr16	82425534	82426221	DiffBind	0	.	4.65	5.6	3.6	2	2.18e-06	0.0206	Distal Intergenic	16	82434828	82435381	554	1	ENST00000563948.1	-8607	AC009117.1	ENSG00000259873.1
chr2	26477414	26478106	DiffBind	0	.	3.04	4.05	1.85	2.2	1.88e-05	0.0468	Promoter (<=1kb)	2	26457203	26478042	20840	2	ENST00000338581.10	0	OTOF	ENSG00000115155.19
chr22	40711503	40711895	DiffBind	0	.	3.78	4.79	2.59	2.2	7.59e-06	0.0363	Distal Intergenic	22	40680107	40681412	1306	1	ENST00000465662.1	31397	MCHR1	ENSG00000128285.4
chr10	125146707	125147440	DiffBind	0	.	4.11	5.12	2.89	2.23	1.56e-05	0.045	Intron (ENST00000337195.9/ENSG00000175029.17, intron 1 of 10)	10	125100587	125138250	37664	2	ENST00000530930.1	-8458	CTBP2	ENSG00000175029.17
chr15	84669065	84669429	DiffBind	0	.	3.24	4.29	1.94	2.35	6.76e-06	0.0363	Promoter (2-3kb)	15	84669544	84671747	2204	2	ENST00000559376.1	2318	SEC11A	ENSG00000140612.14
chr21	36145320	36145545	DiffBind	0	.	2.69	3.75	1.37	2.38	9.8e-06	0.037	Promoter (<=1kb)	21	36132800	36146318	13519	2	ENST00000623579.3	773	CBR3-AS1	ENSG00000236830.7
chr5	148319924	148320973	DiffBind	0	.	4.76	5.83	3.41	2.43	2.85e-06	0.0226	Promoter (<=1kb)	5	148321203	148339722	18520	1	ENST00000511717.6	-230	SPINK9	ENSG00000204909.8
chr21	31336263	31336552	DiffBind	0	.	2.68	3.76	1.26	2.5	1.67e-05	0.045	Intron (ENST00000286827.7/ENSG00000156299.13, intron 3 of 28)	21	31266296	31344279	77984	2	ENST00000455508.1	7727	TIAM1	ENSG00000156299.13
chr1	223631484	223632027	DiffBind	0	.	3.17	4.29	1.66	2.63	1.66e-05	0.045	Promoter (2-3kb)	1	223627040	223628970	1931	2	ENST00000525760.1	-2515	CAPN8	ENSG00000203697.12
chr13	101291749	101292456	DiffBind	0	.	3.69	4.85	1.99	2.87	1.35e-06	0.0192	3' UTR	13	101292069	101332002	39934	2	ENST00000675075.1	39546	NALCN	ENSG00000102452.18
chr1	85015759	85016218	DiffBind	0	.	3.65	1.19	4.19	-3.01	4.69e-06	0.0334	Intron (ENST00000370596.5/ENSG00000162643.13, intron 1 of 21)	1	85018083	85023520	5438	2	ENST00000474447.1	7302	MCOLN3	ENSG00000055732.13
chr21	45607115	45607495	DiffBind	0	.	2.92	4.12	1.06	3.06	5.46e-06	0.0353	Promoter (<=1kb)	21	45607386	45609194	1809	1	ENST00000655224.1	0	AL133493.2	ENSG00000286594.1
chr13	101265861	101266272	DiffBind	0	.	3.98	5.24	1.86	3.38	1.49e-08	0.00106	Intron (ENST00000251127.11/ENSG00000102452.18, intron 10 of 43)	13	101292069	101332002	39934	2	ENST00000675075.1	65730	NALCN	ENSG00000102452.18
chr13	101267569	101268347	DiffBind	0	.	5.6	6.93	2.94	3.99	1.04e-05	0.037	Intron (ENST00000251127.11/ENSG00000102452.18, intron 10 of 43)	13	101292069	101332002	39934	2	ENST00000675075.1	63655	NALCN	ENSG00000102452.18
chr13	101264972	101265287	DiffBind	0	.	3.57	4.95	0.37	4.59	9.34e-07	0.0166	Intron (ENST00000251127.11/ENSG00000102452.18, intron 10 of 43)	13	101292069	101332002	39934	2	ENST00000675075.1	66715	NALCN	ENSG00000102452.18
