# Supplementary material for: Cytotoxic CD8+ Temra cells show loss of chromatin accessibility at genes associated with T cell activation
Source: Front Immunol. 2024 Feb 2;15:1285798. doi: 10.3389/fimmu.2024.1285798 (PMC10870784; doi:10.3389/fimmu.2024.1285798)
Supplement: Supplementary Table 4 — List of differentially accessible regions between high and low CMV responders amongst CD8+ Temra cells. [file Table_4.xlsx]

## Sheet: Sheet1
Antybody	Clone	Company	Catalogue nr
CD3 AF488	UCHT1	BioLegend	300415
CD4 AF700	OKT4	BioLegend	317426
CD8 BV605	RPA-T8	BioLegend	301040
CD45RA PE-Cy7	HI100	BioLegend	304125
CCR7 PE-Dazzle	G043H7	BioLegend	353236
CD137 PE	REA765	Miltenyi Biotec	130-110-763
CD154 BV421	24-31	BioLegend	310824
