# Supplementary material for: Cytotoxic CD8+ Temra cells show loss of chromatin accessibility at genes associated with T cell activation
Source: Front Immunol. 2024 Feb 2;15:1285798. doi: 10.3389/fimmu.2024.1285798 (PMC10870784; doi:10.3389/fimmu.2024.1285798)
Supplement: Supplementary Table 5 — List of differentially expressed genes between CD8+ cell subsets identified by single-cell analysis. [file Table_5.xlsx]

## Sheet: Sheet1
Gene name	Forward	Reverse
β2M	TGCTCGCGCTACTCTCTCT	TCCATTCTCTGCTGGATGAC
GZMB	GCGAATCTGACTTACGCCATTA	CCAGAGTCCCCCTTAAAGGAA
KLRD1	GCTCAGCTTCAACAATTCAACGC	CACAGAGTGGTCTTAAACACTGCC
CCR7	CTTGTCATTTTCCAGGTATGCC	GGAGCACAAAGACTCGAACA
XCL1	CAGCAGGACCTCAGCCATGA	TCACTCCCTACACCTTCCACA
CD27	GGCCACCCCAAAGATCCC	TCGTTGATGGAGGAACAGGG
CD28	CCGGACCTTCTAAGCCCTTT	TCCTCTTACTCCTCACCCAGA
